# Supplementary material for: MLL1 and MLL1 fusion proteins have distinct functions in regulating leukemic transcription program
Source: PubMed Central journal article supplement (PMC4869169; doi:10.1038/celldisc.2016.8), 2016-05-17
Supplement: celldisc20168-s1.pdf [file celldisc20168-s1.pdf]

Supplemental Figure 1

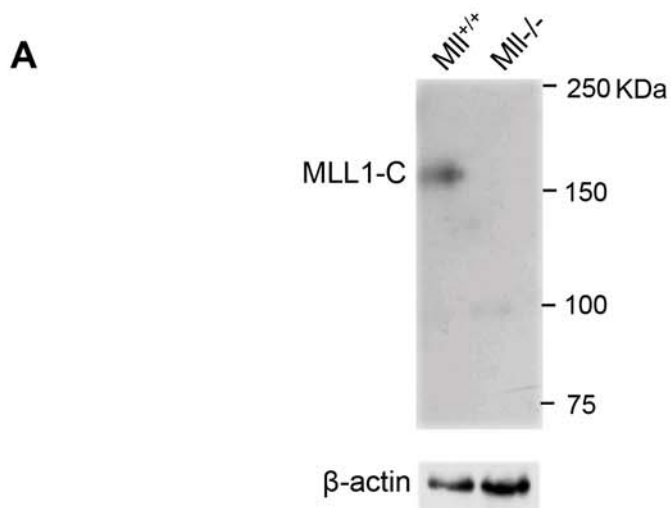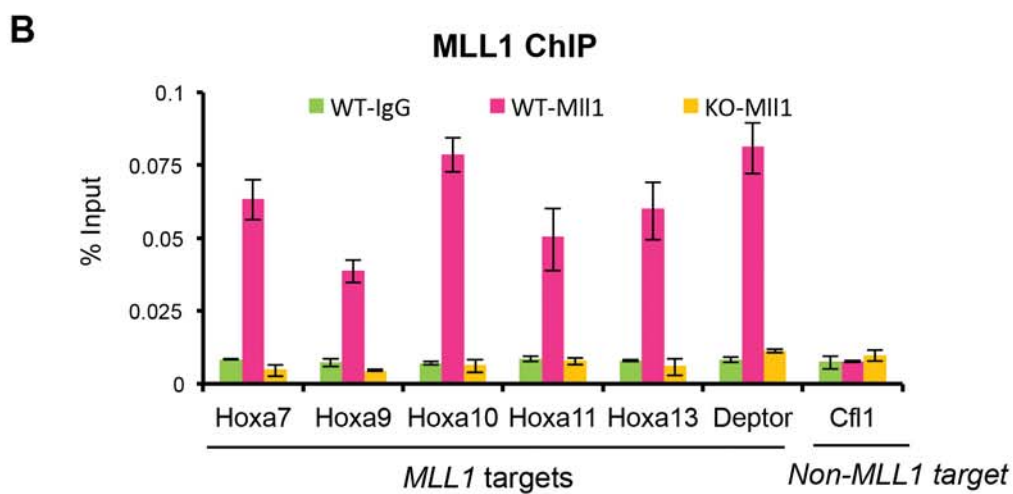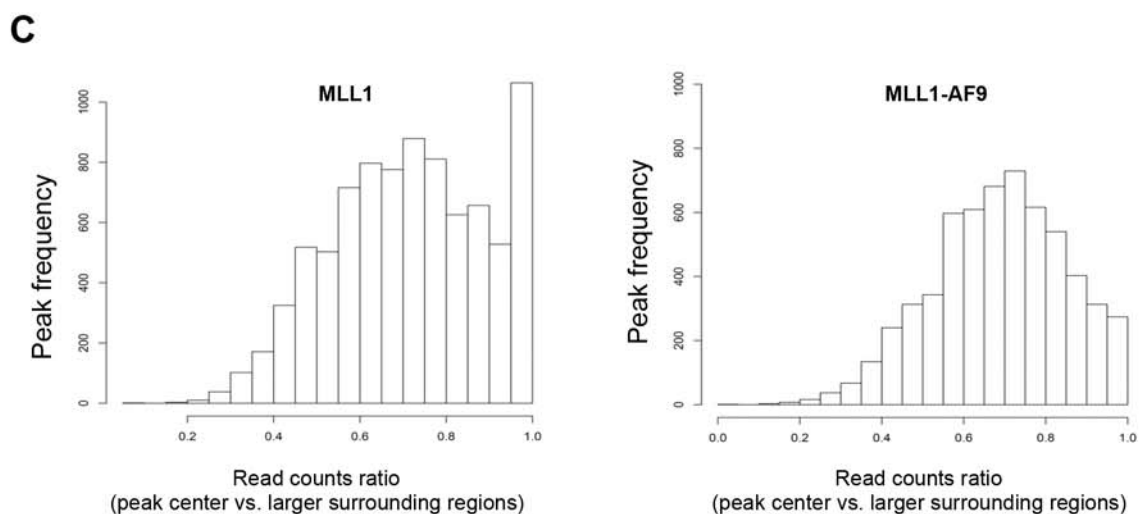

**Supplemental Figure 1.** The anti-MLL1<sup>C</sup> antibody is specific and suitable for the ChIP assay. **A.** Immunoblot of whole cell extracts isolated from MLL1 WT and MLL1 knockout cells as indicated on top. Antibodies were indicated on left. **B.** ChIP for MLL1 at selected targets as indicated on bottom. Blue, IgG control; Red, MLL1 ChIP in wild type cells; Green, MLL1 ChIP in knockout cells. ChIP signals were normalized to 5% input. Means and standard deviations (as error bars) from at least three independent experiments were presented. **C.** Signal to noise ratios for the MLL1 or MLL-AF9 ChIP-seq peaks were calculated and presented as read counts ratio. The tag counts within  $\pm 200$ bp of peak center (called by MACS with P-value cutoff  $1E-04$ ) were compared to the tag counts within  $\pm 500$ bp of peak center. The ratio reflects signal enrichment over the background, i.e. signal/noise ratio. Left, MLL1 ChIP-Seq data; Right, MLL-AF9 ChIP-seq (GSE29130). Y-axis, peak frequency.
