# Supplementary material for: MLL1 and MLL1 fusion proteins have distinct functions in regulating leukemic transcription program
Source: PubMed Central journal article supplement (PMC4869169; doi:10.1038/celldisc.2016.8), 2016-05-17
Supplement: celldisc20168-s3.pdf [file celldisc20168-s3.pdf]

Supplemental Figure 3

**A**

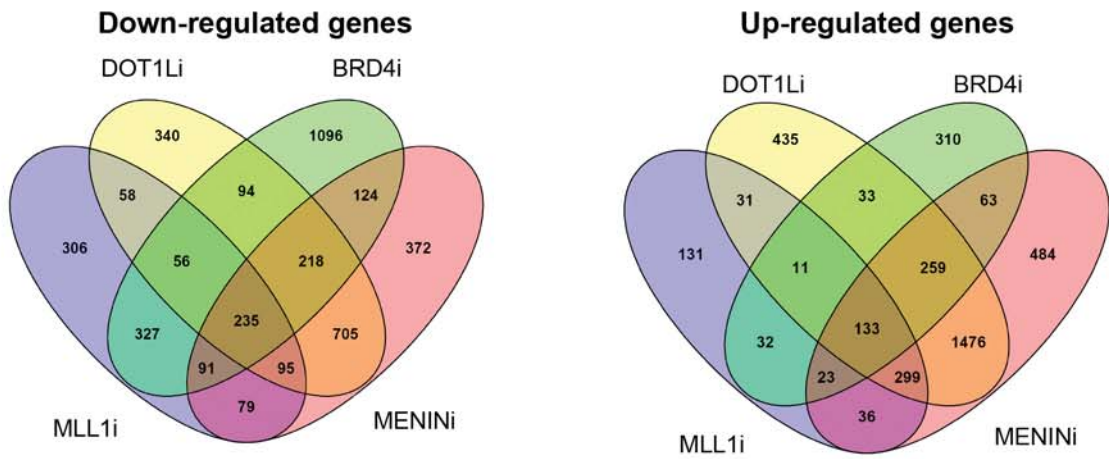

**B**

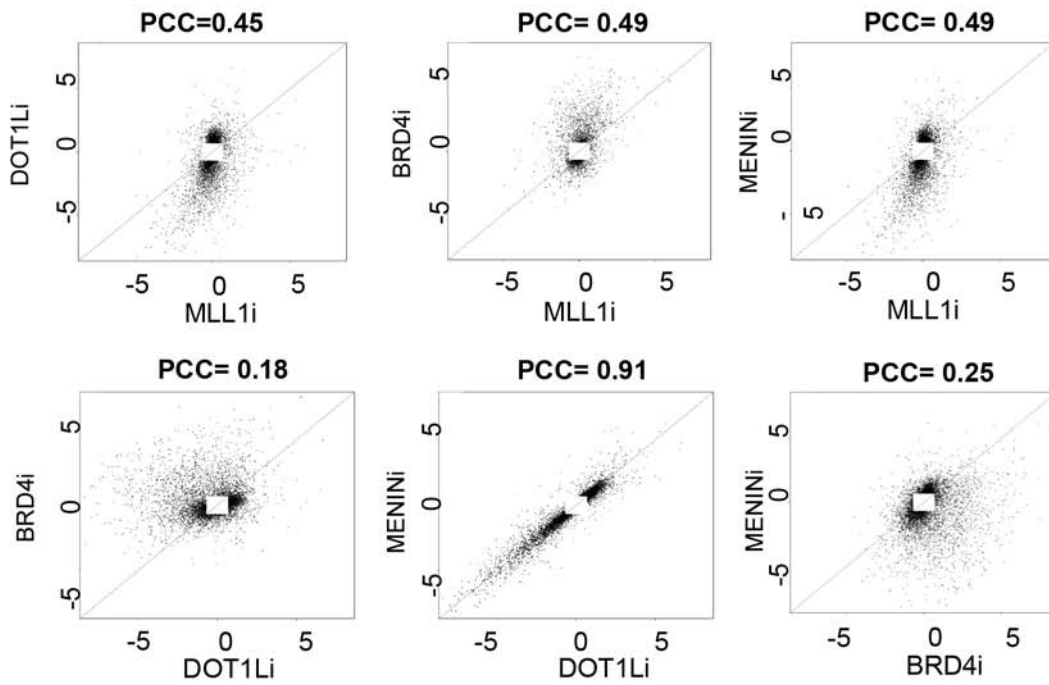

**Supplemental Figure 3.** Transcriptome analyses for MLL-AF9 cells after small molecule inhibitor treatments. **A.** Venn diagram of down (left) and up (right) regulated genes after inhibitor treatments as indicated. Genes with RPKM  $\text{Log}_2$  fold change  $>1$  or  $<-1$  were included. **B.** Scatter plot of pair-wise comparison of gene expression changes after inhibitor treatment. Genes with  $\text{log}_2$  fold change  $>1$  or  $<-1$  were used.
