# Supplementary material for: MLL1 and MLL1 fusion proteins have distinct functions in regulating leukemic transcription program
Source: PubMed Central journal article supplement (PMC4869169; doi:10.1038/celldisc.2016.8), 2016-05-17
Supplement: celldisc20168-s6.pdf [file celldisc20168-s6.pdf]

**A**

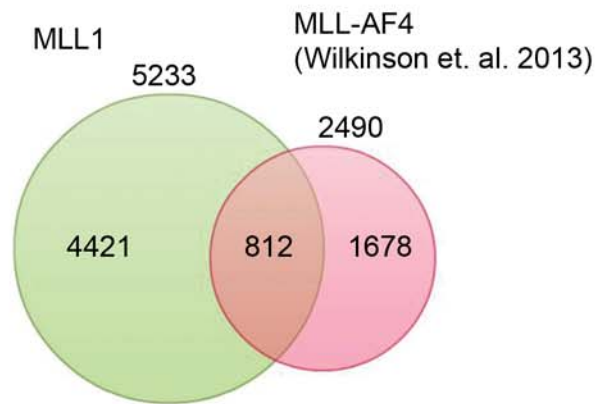

**B**

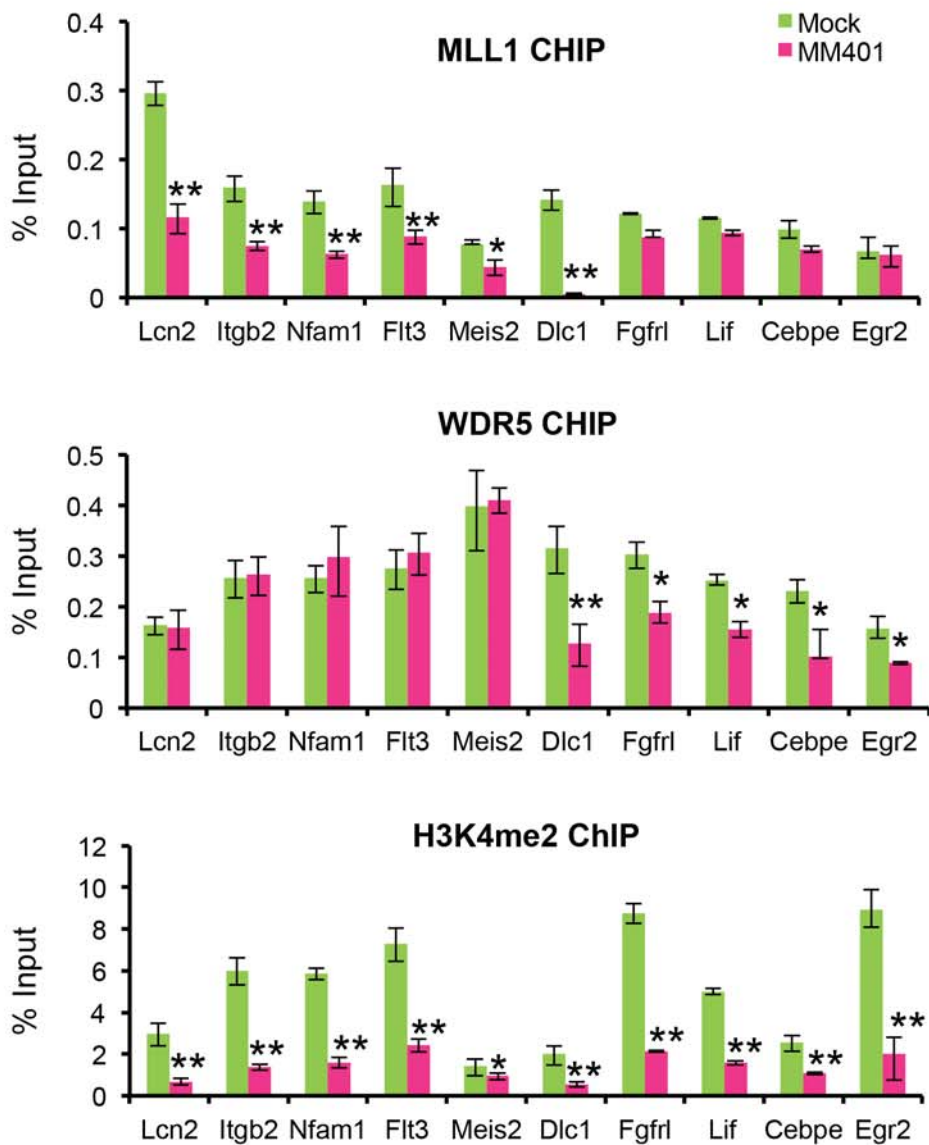

**Supplemental Figure 6** (A) Venn diagram of MLL1 and MLL-AF4 direct targets as indicated. The MLL-AF4 direct targets were previously reported [2]. (B) ChIP assays for MLL1, WDR5 and H3K4me2 in Molm13 cells at selected gene loci as indicated on bottom. Signals for each experiment were normalized to 5% input. Means and standard deviations (as error bars) from at least three independent experiments were presented. Student *t*-test were performed for statistical analyses, \*  $p < 0.05$ , \*\*  $p < 0.01$ .
