# Supplementary material for: MLL1 and MLL1 fusion proteins have distinct functions in regulating leukemic transcription program
Source: PubMed Central journal article supplement (PMC4869169; doi:10.1038/celldisc.2016.8), 2016-05-17
Supplement: celldisc20168-s7.pdf [file celldisc20168-s7.pdf]

**Supplemental Table 1** Complete lists for the binding sites for MLL1, WDR5 and H3K4me2 as detected by CHIP-seq.

**DMSO\_WDR5 bound gene annotation**

| Chr   | Start    | End      | Annotation  | Detailed Ar | Distance to | Nearest Pr | Entrez ID | Gene Name  | Gene Alias |
|-------|----------|----------|-------------|-------------|-------------|------------|-----------|------------|------------|
| chr19 | 58858502 | 58858825 | Intergenic  | MLT1C LTF   | 10241       | NM_02620   | 67507     | 1700019N1- |            |
| chr7  | 87177377 | 87177725 | intron (NM  | intron (NM  | 6437        | NM_17543   | 209225    | Zfp710     | 5430400NC  |
| chr11 | 51912927 | 51913000 | intron (NM  | CpG         | 637         | NM_01941   | 19052     | Ppp2ca     | PP2A R753  |
| chr10 | 77888477 | 77888750 | intron (NM  | CpG         | 198         | NM_00779   | 13014     | Cstb       | AA960480   |
| chr9  | 64128877 | 64128950 | promoter-1  | promoter-1  | -501        | NM_02537   | 66131     | Tipin      | 1110005AC  |
| chr2  | 1.37E+08 | 1.37E+08 | promoter-1  | promoter-1  | -157        | NM_01382   | 16449     | Jag1       | ABE2 Gsfa  |
| chr14 | 60588627 | 60588950 | intron (NM  | intron (NM  | 116883      | NM_01580   | 50769     | Atp8a2     | AI415030 , |
| chr2  | 90757502 | 90758275 | exon (NM_   | exon (NM_   | 319         | NM_02557   | 66461     | Ptpmt1     | 1110001D1  |
| chr13 | 91600677 | 91600825 | promoter-1  | promoter-1  | 49          | NM_02418   | 66970     | Ssbp2      | 1500004KC  |
| chr6  | 51420727 | 51421125 | intron (NM  | CpG-12065   | 311         | NM_00762   | 12417     | Cbx3       | HP1g M32   |
| chr13 | 37491152 | 37491550 | intron (NM  | intron (NM  | 54137       | NM_01074   | 17084     | Ly86       | MD-1 MD1   |
| chr7  | 1.07E+08 | 1.07E+08 | intron (NML | L1MC4a LI   | 10248       | NM_00116   | 446101    | Xrra1      | AI449753   |
| chr9  | 50411652 | 50411725 | promoter-1  | promoter-1  | 266         | NM_02584   | 66925     | Sdhd       | 3110001M   |
| chr1  | 66747902 | 66748450 | intron (NM  | intron (NM  | 709         | NM_02568   | 66646     | Rpe        | 2810429BC  |
| chr9  | 43708327 | 43708625 | Intergenic  | Intergenic  | -142991     | NM_00938   | 21838     | Thy1       | CD90 T25   |
| chr3  | 1.21E+08 | 1.21E+08 | Intergenic  | Intergenic  | -1592       | NM_01017   | 14066     | F3         | AA409063   |
| chr1  | 26334527 | 26334650 | Intergenic  | RMER15 L    | 409717      | NM_00103   | 210940    | 4931408C2- |            |
| chr1  | 1.64E+08 | 1.64E+08 | Intergenic  | Intergenic  | -6300       | NM_01017   | 14103     | Fasl       | APT1LG1 C  |
| chr6  | 1.23E+08 | 1.23E+08 | Intergenic  | B1F2 SINE   | -23925      | NM_01140   | 20527     | Slc2a3     | AA408729   |
| chr4  | 1.19E+08 | 1.19E+08 | promoter-1  | promoter-1  | -303        | NM_00129   | 230700    | Foxj3      | C330039GC  |
| chr10 | 7310002  | 7310100  | exon (NM_   | exon (NM_   | 453         | NM_17278   | 237253    | Lrp11      | 1700034J1' |
| chr1  | 95376152 | 95376250 | promoter-1  | promoter-1  | 563         | NM_00115   | 18000     | 2-Sep      | AW208991   |
| chr16 | 56029977 | 56030225 | promoter-1  | promoter-1  | -271        | NM_00102   | 76302     | Pcnp       | 1110018DC  |
| chr10 | 20859552 | 20859675 | intron (NM  | intron (NM  | 21177       | NM_00119   | 17863     | Myb        | AI550390 I |
| chr2  | 1.64E+08 | 1.64E+08 | intron (NM  | intron (NM  | 9040        | NM_01110   | 18769     | Pkig       | PKIgamma   |
| chr6  | 1.35E+08 | 1.35E+08 | intron (NM  | intron (NM  | 833         | NM_13044   | 70686     | Dusp16     | 3830417M   |
| chr16 | 30604402 | 30604500 | Intergenic  | Intergenic  | 4642        | NM_17763   | 224093    | Fam43a     | Tuf1       |
| chr11 | 28265652 | 28265800 | Intergenic  | Intergenic  | 218598      | NM_00116   | 216613    | Ccdc85a    | -          |
| chr9  | 1.19E+08 | 1.19E+08 | 3' UTR (NV  | 3' UTR (NV  | -10043      | NM_00739   | 11481     | Acvr2b     | ActRIIB    |
| chr6  | 1.21E+08 | 1.21E+08 | intron (NM  | intron (NM  | 1962        | NM_00754   | 12122     | Bid        | 2700049M   |
| chr11 | 1.03E+08 | 1.03E+08 | intron (NM  | intron (NM  | 3599        | NM_01967   | 57778     | Fmnl1      | 8030453N1  |
| chr1  | 95698577 | 95698650 | promoter-1  | promoter-1  | -102        | NM_00110   | 21915     | Dtymk      | AU044245   |
| chr10 | 79578802 | 79578900 | promoter-1  | promoter-1  | -430        | NM_01149   | 20869     | Stk11      | AA408040   |
| chr8  | 1.26E+08 | 1.26E+08 | intron (NM  | intron (NM  | 26831       | NM_02049   | 57247     | Zfp276     | AW048709   |
| chr2  | 1.45E+08 | 1.45E+08 | Intergenic  | Intergenic  | -15759      | NM_05319   | 94249     | Slc24a3    | NCKX3      |
| chr16 | 22060402 | 22060525 | 3' UTR (NV  | 3' UTR (NV  | 50906       | NR_027488  | 75826     | Senp2      | 2310007LO  |
| chr4  | 1.01E+08 | 1.01E+08 | intron (NM  | Lx8 LINE L  | 24814       | NM_00116   | 72685     | Dnajc6     | 2810027M   |
| chr9  | 32346827 | 32347125 | intron (NM  | intron (NM  | 2061        | NM_00802   | 14247     | Fli1       | EWSR2 Fli- |
| chr1  | 99569502 | 99569600 | Intergenic  | Intergenic  | -10956      | NM_13382   | 52392     | D1Ertd622  | AI987691 , |
| chr1  | 21551802 | 21552000 | intron (NM  | intron (NM  | 178264      | NM_00111   | 98582     | Khdc1b     | AU014713   |
| chr15 | 58836002 | 58836075 | intron (NM  | intron (NM  | 70673       | NM_02317   | 66218     | Ndufb9     | 1190008J1. |
| chr1  | 97210177 | 97210625 | exon (NM_   | exon (NM_   | 196         | NM_02632   | 67698     | Fam174a    | 2310044D2  |
| chr11 | 1.2E+08  | 1.2E+08  | promoter-1  | promoter-1  | 378         | NM_01156   | 21681     | Alyref     | ALY REF1   |
| chr9  | 64677852 | 64678050 | intron (NM  | intron (NM  | 19133       | NM_00116   | 102442    | Dennd4a    | AI115600 , |
| chr7  | 52114677 | 52114825 | intron (NM  | intron (NM  | 1978        | NM_00129   | 59047     | Pnkp       | 1810009GC  |

|       |          |          |            |             |        |           |        |          |            |
|-------|----------|----------|------------|-------------|--------|-----------|--------|----------|------------|
| chr4  | 11249102 | 11249400 | promoter-1 | promoter-1  | 27     | NM_00108  | 381510 | Dpy194   | Gm1023 N   |
| chr17 | 78761677 | 78761925 | intron (NM | intron (NM  | 55691  | NM_00128  | 225020 | Fez2     | 9030616F1  |
| chr13 | 61666327 | 61666575 | intron (NM | intron (NM  | 5036   | NM_02690  | 117066 | Cts3     | 160000012: |
| chr12 | 31786252 | 31786325 | Intergenic | Intergenic  | 27455  | NM_02782  | 104943 | Fam110c  | 90306110:  |
| chr2  | 1.8E+08  | 1.8E+08  | promoter-1 | promoter-1  | -883   | NM_02558  | 66481  | Rps21    | 1810049N1  |
| chr2  | 6632077  | 6632175  | intron (NM | intron (NM  | 173916 | NM_01016  | 14007  | Celf2    | B2302180C  |
| chr15 | 12307577 | 12307800 | intron (NM | MIRb SINE   | 56437  | NM_02567  | 66629  | Golph3   | 4733401NC  |
| chr2  | 1.02E+08 | 1.02E+08 | intron (NM | intron (NM  | 41954  | NM_17888  | 241576 | Ldlrad3  | 6430500PC  |
| chr17 | 72507652 | 72507800 | intron (NM | MIRc SINE   | 376439 | NM_03017  | 78785  | Clip4    | 1700024K1  |
| chr16 | 32159102 | 32159275 | intron (NM | intron (NM  | 6374   | NM_14606  | 224109 | Nrros    | E430025L0  |
| chr1  | 33776777 | 33777075 | promoter-1 | promoter-1  | 185    | NM_00899  | 19335  | Rab23    | AW545388   |
| chr11 | 21302952 | 21303200 | Intergenic | Intergenic  | -31806 | NM_00129  | 216558 | Ugp2     | UDPGP UC   |
| chr3  | 19091052 | 19091275 | intron (NR | RLTR11B L   | 2942   | NR_04557! | 67472  | Mtfr1    | 1300002CC  |
| chr11 | 68938652 | 68938875 | Intergenic | Intergenic  | -1116  | NM_01178  | 23801  | Aloxe3   | e-LOX-3 el |
| chr11 | 54734852 | 54735100 | intron (NM | intron (NM  | 18620  | NM_00816  | 14778  | Gpx3     | AA960521   |
| chr1  | 75371702 | 75372150 | promoter-1 | promoter-1  | 54     | NM_00746  | 11790  | Speg     | AW125581   |
| chr9  | 42104627 | 42104850 | Intergenic | Intergenic  | -32355 | NM_17276  | 235293 | Sc5d     | A830037KC  |
| chr7  | 1.17E+08 | 1.17E+08 | Intergenic | Intergenic  | 42090  | NM_00951  | 22390  | Wee1     | Wee1A      |
| chr6  | 1.19E+08 | 1.19E+08 | exon (NM   | exon (NM    | 1140   | NM_13394  | 101358 | Fbxl14   | AW322056   |
| chr5  | 23670952 | 23671075 | exon (NM   | exon (NM    | 232    | NM_15309  | 231042 | Nupl2    | AV116043   |
| chr12 | 21423277 | 21423350 | promoter-1 | promoter-1  | -16    | NM_01173  | 22630  | Ywhaq    | 2700028PC  |
| chr4  | 1.07E+08 | 1.07E+08 | exon (NM   | exon (NM    | 345    | NM_02550  | 56280  | Mrpl37   | 2300004O:  |
| chr17 | 74738227 | 74738625 | promoter-1 | promoter-1  | 99     | NM_01696  | 50850  | Spast    | Spg4 mKIA  |
| chr8  | 47223577 | 47223750 | Intergenic | Intergenic  | -14163 | NM_20721  | 102141 | Snx25    | AI661919 u |
| chr4  | 1.07E+08 | 1.07E+08 | Intergenic | Intergenic  | 47966  | NM_01987  | 56296  | Dmrtb1   | Dmrt6 Prp  |
| chr3  | 1.33E+08 | 1.33E+08 | Intergenic | Intergenic  | -3648  | NM_02995  | 77669  | Arhgef38 | 9130221D:  |
| chr15 | 36782177 | 36782375 | Intergenic | Intergenic  | -55592 | NM_00125  | 22631  | Ywhaz    | 111001311: |
| chr6  | 1.21E+08 | 1.21E+08 | TTS (NM    | 0 TTS (NM_0 | 15488  | NM_01737  | 53857  | Tuba8    | -          |
| chr17 | 27954077 | 27954400 | intron (NM | intron (NM  | 3249   | NM_00103  | 224647 | D17Wsu92 | AU020189   |
| chr18 | 23159577 | 23159825 | intron (NM | intron (NM  | 37463  | NM_00116  | 319211 | Nol4     | 1700013J1: |
| chr1  | 1.62E+08 | 1.62E+08 | intron (NM | CpG         | 297    | NM_00978  | 12301  | Cacybp   | SIP        |
| chr12 | 1.12E+08 | 1.12E+08 | Intergenic | MIRm SINI   | -6193  | NM_00128  | 22031  | Traf3    | AI528849 u |
| chr11 | 1.21E+08 | 1.21E+08 | exon (NM   | exon (NM    | 219    | NM_02642  | 67880  | Dcxr     | 0610038KC  |
| chr11 | 51420152 | 51420425 | promoter-1 | promoter-1  | 95     | NM_00104  | 15384  | Hnrnpab  | 3010025C1  |
| chr6  | 35489402 | 35489625 | intron (NM | CpG         | 375    | NM_00809  | 14489  | Mtpn     | 5033418D1  |
| chr4  | 1.16E+08 | 1.16E+08 | promoter-1 | promoter-1  | -269   | NM_02986  | 77110  | Gbbp111  | 5330440M   |
| chr13 | 1.09E+08 | 1.09E+08 | intron (NM | intron (NM  | -39618 | NM_17868  | 218581 | Depdc1b  | 98301320C  |
| chr13 | 1.02E+08 | 1.02E+08 | Intergenic | Intergenic  | -32931 | NM_02288  | 69048  | Slc30a5  | 1810010KC  |
| chr2  | 1.02E+08 | 1.02E+08 | intron (NM | intron (NM  | -20402 | NM_00107  | 20511  | Slc1a2   | 1700091C1  |
| chr2  | 1.52E+08 | 1.52E+08 | intron (NM | intron (NM  | 1725   | NM_00778  | 12995  | Csnk2a1  | Csnk2a1-rs |
| chr19 | 53962877 | 53963225 | Intergenic | Intergenic  | -3670  | NM_01105  | 18569  | Pdcd4    | D19Ucla1   |
| chr1  | 1.23E+08 | 1.23E+08 | intron (NM | intron (NM  | 492    | NM_00127  | 72999  | Insig2   | 290005311: |
| chr17 | 6106927  | 6107075  | intron (NM | CpG         | 171    | NM_00110  | 68842  | Tulp4    | 1110057PC  |
| chr11 | 59652952 | 59653075 | intron (NM | CpG         | 256    | NM_01199  | 26572  | Cops3    | Csn3 Sgn3  |
| chr9  | 75944777 | 75945100 | intron (NM | intron (NM  | 82154  | NM_17373  | 208982 | Hmgcll1  | BC037381   |
| chr16 | 32644077 | 32644300 | promoter-1 | promoter-1  | -541   | NM_00111  | 51789  | Tnk2     | Ack Ack-1  |
| chr2  | 37278077 | 37278400 | intron (NM | CpG         | 185    | NM_00110  | 319817 | Rc3h2    | 2900024NC  |

|       |          |          |            |             |         |          |        |           |            |
|-------|----------|----------|------------|-------------|---------|----------|--------|-----------|------------|
| chr2  | 1.53E+08 | 1.53E+08 | Intergenic | MTD LTR I   | -32456  | NM_00113 | 329540 | Nol4l     | 4931410H1  |
| chr19 | 46072827 | 46073025 | promoter-1 | promoter-1  | 52      | NM_19829 | 71617  | 9130011E1 | AI431055 I |
| chr17 | 17511352 | 17511425 | promoter-1 | promoter-1  | 92      | NM_02593 | 67045  | Riok2     | 2010110K2  |
| chr16 | 54115652 | 54115850 | Intergenic | L1Md_F2 I   | 1167599 | NM_17872 | 239852 | Zpld1     | 9430016A2  |
| chr10 | 35764927 | 35765600 | Intergenic | RLTR13D3    | -461350 | NM_00125 | 319415 | Hs3st5    | D930005LC  |
| chr6  | 59112977 | 59113150 | Intergenic | Intergenic  | -45801  | NM_00108 | 68140  | Tigd2     | 363241001  |
| chr1  | 97553927 | 97554325 | intron (NM | intron (NM  | 10045   | NM_00918 | 20452  | St8sia4   | PST PST-1  |
| chr1  | 64784802 | 64784975 | promoter-1 | promoter-1  | -564    | NM_02272 | 14367  | Fzd5      | 5330434NC  |
| chr4  | 1.32E+08 | 1.32E+08 | 5' UTR (NM | 5' UTR (NM  | 115     | NM_02792 | 71787  | Trnau1ap  | 1110007F0  |
| chr19 | 38171452 | 38171675 | promoter-1 | promoter-1  | -6      | NM_18174 | 107221 | Ffar4     | AI552415 I |
| chr3  | 94690977 | 94691075 | promoter-1 | promoter-1  | -146    | NM_00894 | 19172  | Psmb4     | Pros-27    |
| chr1  | 1.35E+08 | 1.35E+08 | intron (NM | intron (NM  | 12837   | NM_00857 | 17248  | Mdm4      | 4933417NC  |
| chr7  | 28233627 | 28233700 | intron (NM | MIR SINE    | 666     | NM_14492 | 233016 | Blvr      | -          |
| chr2  | 1.65E+08 | 1.65E+08 | Intergenic | Intergenic  | -1688   | NM_19902 | 329559 | Zfp335    | 1810045J0  |
| chr8  | 1.08E+08 | 1.08E+08 | promoter-1 | promoter-1  | -160    | NM_02888 | 74356  | 4931428F0 | AI426165 I |
| chr2  | 32306602 | 32306775 | exon (NM_  | exon (NM_   | 302     | NM_00116 | 227731 | Slc25a25  | 1110030N1  |
| chr11 | 49832302 | 49832400 | Intergenic | Intergenic  | -6482   | NM_02154 | 59044  | Rnf130    | G1RZFP G1  |
| chr15 | 63872402 | 63872550 | intron (NM | intron (NM  | 19534   | NM_14484 | 223601 | Fam49b    | 0910001AC  |
| chr6  | 1.47E+08 | 1.47E+08 | promoter-1 | promoter-1  | -138    | NM_02531 | 108098 | Med21     | 0610007L0  |
| chr1  | 88421327 | 88422025 | Intergenic | CpG         | -1635   | NM_00897 | 19231  | Ptma      | Thym       |
| chr8  | 72315552 | 72315650 | intron (NM | CpG         | 539     | NM_13322 | 170759 | Atp13a1   | Atp13a Cg  |
| chr5  | 1.22E+08 | 1.22E+08 | exon (NM_  | exon (NM_   | 1266    | NM_01129 | 19988  | Rpl6      | Taxreb107  |
| chr4  | 1.34E+08 | 1.34E+08 | intron (NM | intron (NM  | 382     | NM_00128 | 71904  | Paqr7     | 2310021M   |
| chr3  | 95951877 | 95951950 | intron (NM | intron (NM  | -13980  | NM_18140 | 194126 | Mtmr11    | AI035306 I |
| chr5  | 73243227 | 73243325 | intron (NM | L2 LINE L2  | 16411   | NM_00111 | 21682  | Tec       | -          |
| chr4  | 1.55E+08 | 1.55E+08 | 5' UTR (NM | 5' UTR (NM  | 235     | NM_02533 | 66077  | Aurkaip1  | 0610033HC  |
| chr9  | 1.11E+08 | 1.11E+08 | TTS (NM_1  | TTS (NM_1   | -2872   | NM_18310 | 74306  | Prss46    | 1700112C1  |
| chr2  | 1.25E+08 | 1.25E+08 | intron (NM | intron (NM  | 113462  | NM_02359 | 110074 | Dut       | 5031412I0  |
| chr12 | 29579602 | 29579850 | Intergenic | Intergenic  | 143033  | NM_20135 | 380752 | Tssc1     | D12Erd60   |
| chr6  | 1.25E+08 | 1.25E+08 | intron (NM | ORR1A2-in   | 6176    | NM_17555 | 269800 | Zfp384    | BB163993   |
| chr12 | 1.01E+08 | 1.01E+08 | intron (NM | intron (NM  | 93989   | NM_03017 | 78767  | Efcab11   | 2610021K2  |
| chr3  | 90051877 | 90052075 | promoter-1 | promoter-1  | -138    | NM_01390 | 30791  | Slc39a1   | Zip1 Zirtl |
| chr2  | 29988602 | 29988825 | promoter-1 | promoter-1  | -678    | NM_14625 | 70296  | Tbc1d13   | 2600014AC  |
| chr3  | 1.01E+08 | 1.01E+08 | intron (NM | intron (NM  | 42340   | NM_20720 | 78908  | Igsf3     | 1700016K1  |
| chr18 | 70849177 | 70849600 | Intergenic | Intergenic  | 121442  | NM_01077 | 17191  | Mbd2      | MBD2a      |
| chr7  | 1.08E+08 | 1.08E+08 | promoter-1 | promoter-1  | -474    | NM_02428 | 19346  | Rab6a     | 2610028L1  |
| chr14 | 55502402 | 55502550 | intron (NM | intron (NM  | 214     | NM_00753 | 12050  | Bcl2l2    | AW048834   |
| chr10 | 1.27E+08 | 1.27E+08 | intron (NM | intron (NM  | 16403   | NM_00851 | 16971  | Lrp1      | A2mr AI31  |
| chr2  | 1.67E+08 | 1.67E+08 | Intergenic | Intergenic  | -16331  | NM_17778 | 277360 | Prex1     | G630042GI  |
| chr3  | 1.29E+08 | 1.29E+08 | intron (NM | intron (NM  | 88634   | NM_13045 | 170439 | Elovl6    | C77826 FA  |
| chr1  | 1.31E+08 | 1.31E+08 | Intergenic | Charlie25 I | -34137  | NM_00991 | 12767  | Cxcr4     | CD184 Cm   |
| chr2  | 1.52E+08 | 1.52E+08 | intron (NM | CpG         | 378     | NM_21244 | 228769 | Psmf1     | AW048666   |
| chr2  | 1.2E+08  | 1.2E+08  | exon (NM_  | exon (NM_   | 178     | NM_14612 | 228550 | Itpka     | -          |
| chr1  | 52198552 | 52198650 | intron (NM | intron (NM  | 22135   | NM_00120 | 20846  | Stat1     | 2010005J0  |
| chr7  | 51655277 | 51655400 | TTS (NM_0  | TTS (NM_0   | 15842   | NM_01666 | 20981  | Syt3      | AI385753 I |
| chr6  | 53457552 | 53457725 | Intergenic | Intergenic  | -65730  | NM_17272 | 231991 | Creb5     | Crebpa D4  |
| chr14 | 56724352 | 56724450 | Intergenic | Intergenic  | -2990   | NM_00780 | 13035  | Ctsg      | -          |

|       |          |          |            |             |         |          |        |           |            |
|-------|----------|----------|------------|-------------|---------|----------|--------|-----------|------------|
| chr10 | 19467577 | 19467750 | intron (NM | intron (NM  | 35270   | NM_17278 | 237313 | Il20ra    | E230031K1  |
| chr1  | 1.46E+08 | 1.46E+08 | Intergenic | L3 LINE Cf  | 57166   | NM_00906 | 19735  | Rgs2      | GOS8       |
| chr6  | 32730652 | 32730775 | Intergenic | Intergenic  | -192521 | NM_17575 | 243743 | Plxna4    | 9330117B1  |
| chr18 | 67550977 | 67551400 | intron (NM | CpG-7057    | 803     | NM_02647 | 67951  | Tubb6     | 2310057H1  |
| chr7  | 1.13E+08 | 1.13E+08 | promoter-1 | promoter-1  | 154     | NM_02980 | 76932  | Arfp2     | 2310002N0  |
| chr13 | 4608027  | 4608950  | promoter-1 | promoter-1  | -78     | NM_01885 | 56043  | Akr1e1    | 1810061110 |
| chr5  | 42235377 | 42235625 | promoter-1 | promoter-1  | 53      | NM_00108 | 665775 | Bod1l     | A230054D0  |
| chr15 | 81559677 | 81560000 | intron (NM | CpG         | 511     | NM_01124 | 19387  | Rangap1   | C79654 Fu  |
| chr12 | 56567277 | 56567425 | Intergenic | Intergenic  | 26283   | NM_01090 | 18035  | Nfkbia    | AI462015 I |
| chr5  | 1.46E+08 | 1.46E+08 | intron (NM | CpG         | 301     | NM_02314 | 11867  | Arpc1b    | 41kDa AA4  |
| chr2  | 26662527 | 26662625 | Intergenic | RMER19B     | 57939   | NM_03071 | 80908  | Abo       | NAGAT      |
| chr15 | 38465227 | 38465425 | Intergenic | Intergenic  | -16305  | NM_01874 | 54375  | Azin1     | 1700085L0  |
| chr10 | 23507127 | 23507375 | promoter-1 | promoter-1  | -236    | NM_01129 | 20042  | Rps12     | -          |
| chr8  | 1.08E+08 | 1.08E+08 | intron (NM | CpG         | 177     | NM_17343 | 244631 | Pskh1     | AW539964   |
| chr14 | 59819652 | 59820325 | promoter-1 | promoter-1  | -77     | NM_02776 | 71330  | Rcbtb1    | 5430409110 |
| chr10 | 11407327 | 11407525 | Intergenic | IAP-d-int L | 344183  | NM_01014 | 13853  | Epm2a     | TG-B Tg(Tc |
| chr2  | 68698752 | 68699150 | promoter-1 | promoter-1  | -663    | NM_17285 | 241447 | Cers6     | 4732462CC  |
| chr8  | 64849927 | 64850125 | Intergenic | Intergenic  | -248036 | NM_01192 | 26359  | Anxa10    | -          |
| chr1  | 34858727 | 34859075 | intron (NM | CpG         | 334     | NM_18301 | 226970 | Arhgef4   | 9330140K1  |
| chr19 | 16207752 | 16207875 | 5' UTR (NV | 5' UTR (NV  | 492     | NM_00813 | 14682  | Gnaq      | 1110005L0  |
| chr14 | 1.04E+08 | 1.04E+08 | promoter-1 | promoter-1  | 4       | NM_20721 | 105689 | Mycbp2    | AU023734   |
| chr11 | 1.16E+08 | 1.16E+08 | intron (NM | intron (NM  | 2494    | NM_02417 | 60441  | Mrpl38    | 1110036N2  |
| chr11 | 94232302 | 94232600 | intron (NM | intron (NM  | 21839   | NM_02960 | 76408  | Abcc3     | 1700019L0  |
| chr7  | 86524827 | 86524925 | exon (NM_  | exon (NM_   | 7037    | NM_02059 | 19771  | Rlbp1     | 3110056M   |
| chr17 | 31433227 | 31433325 | 5' UTR (NV | 5' UTR (NV  | 107     | NM_00124 | 224674 | Slc37a1   | G3PP       |
| chr18 | 46901527 | 46901750 | promoter-1 | promoter-1  | 67      | NM_00968 | 11777  | Ap3s1     | [s]3A      |
| chr12 | 96692452 | 96692550 | Intergenic | Intergenic  | -237935 | NM_20151 | 399558 | Flrt2     | -          |
| chr13 | 1.14E+08 | 1.14E+08 | Intergenic | Intergenic  | 57721   | NM_02361 | 71690  | Esm1      | 0610042H2  |
| chr6  | 22301677 | 22301825 | intron (NM | intron (NM  | 4330    | NM_13858 | 27999  | Fam3c     | D6Wsu176   |
| chr3  | 75758077 | 75758375 | intron (NM | intron (NM  | 2645    | NM_17519 | 73124  | Golim4    | 3110027H2  |
| chr7  | 38716802 | 38717075 | Intergenic | Intergenic  | 87633   | NM_01127 | 19777  | Uri1      | C80913 NM  |
| chr4  | 1.55E+08 | 1.55E+08 | exon (NM_  | exon (NM_   | 462     | NM_17869 | 230991 | B930041F1 | MNCb-396   |
| chr4  | 1.38E+08 | 1.38E+08 | intron (NM | intron (NM  | 330     | NM_17270 | 230861 | Eif4g3    | 1500002J2  |
| chr17 | 5189952  | 5190100  | intron (NM | CpG         | 194952  | NM_00108 | 239985 | Arid1b    | 8030481M   |
| chr11 | 45679502 | 45679575 | intron (NM | Lx9 LINE L  | 14072   | NM_00104 | 216705 | Clint1    | AI642036 , |
| chr1  | 1.27E+08 | 1.27E+08 | intron (NM | intron (NM  | 19516   | NM_02373 | 74117  | Actr3     | 1200003AC  |
| chr6  | 28373727 | 28373925 | intron (NM | intron (NM  | 186     | NM_00748 | 11844  | Arf5      | -          |
| chr5  | 32714777 | 32714925 | Intergenic | MLT1D LTI   | -46492  | NM_17270 | 19046  | Ppp1cb    | 1200010B1  |
| chr13 | 98772277 | 98772400 | intron (NM | intron (NM  | 203782  | NM_01202 | 110596 | Arhgef28  | 9230110L0  |
| chr16 | 24090177 | 24090775 | Intergenic | Intergenic  | -101778 | NM_00974 | 12053  | Bcl6      | Bcl5       |
| chrX  | 1.39E+08 | 1.39E+08 | intron (NM | intron (NM  | 1469    | NM_00119 | 209497 | Tmem164   | AI316850 , |
| chr11 | 98662702 | 98663000 | intron (NM | intron (NM  | 5768    | NM_02872 | 74026  | Msl1      | 2810017F1  |
| chr5  | 1.39E+08 | 1.39E+08 | Intergenic | Intergenic  | -71572  | NM_03056 | 80752  | Fam20c    | C76981 DM  |
| chrX  | 13421902 | 13422075 | intron (NM | intron (NM  | 1694    | NM_00128 | 12361  | Cask      | DXPri1 DXI |
| chr3  | 21835277 | 21835350 | Intergenic | Intergenic  | -140261 | NM_03073 | 81004  | Tbl1xr1   | 8030499HC  |
| chr1  | 1.17E+08 | 1.17E+08 | Intergenic | RMER17B     | -974276 | NM_00107 | 636808 | Cntnap5a  | Caspr5-1 E |
| chr2  | 32815902 | 32816100 | intron (NM | MIRb SINE   | 774     | NM_19930 | 227738 | Lrsam1    | -          |

|       |          |          |            |            |         |          |        |            |            |
|-------|----------|----------|------------|------------|---------|----------|--------|------------|------------|
| chr18 | 32513002 | 32513175 | Intergenic | MTC LTR I  | -23783  | NM_00108 | 30948  | Bin1       | ALP-1 Amq  |
| chr9  | 54798277 | 54798425 | promoter-1 | promoter-1 | -315    | NM_01196 | 26441  | Psma4      | C9         |
| chr17 | 24343627 | 24343800 | exon (NM_  | exon (NM_  | -1206   | NM_00116 | 224617 | Tbc1d24    | 9630033P1  |
| chr4  | 1.53E+08 | 1.53E+08 | promoter-1 | promoter-1 | -233    | NM_17528 | 97159  | A430005L1  | C79672     |
| chr16 | 32113852 | 32114050 | Intergenic | Intergenic | 14063   | NM_02589 | 66994  | Cep19      | 1500031L0  |
| chr1  | 1.93E+08 | 1.93E+08 | intron (NM | intron (NM | 1836    | NM_17877 | 320119 | Rps6kc1    | AA682037   |
| chr17 | 27760202 | 27760400 | promoter-1 | promoter-1 | 96      | NM_01983 | 56409  | Nudt3      | 1110011BC  |
| chr5  | 1.15E+08 | 1.15E+08 | Intergenic | Intergenic | -13480  | NM_00932 | 21405  | Hnf1a      | AI323641 I |
| chr3  | 1.09E+08 | 1.09E+08 | intron (NM | intron (NM | -61962  | NM_14613 | 57257  | Vav3       | A530094I0  |
| chr1  | 1.58E+08 | 1.58E+08 | promoter-1 | promoter-1 | -368    | NM_17284 | 240832 | Tor1aip2   | 1110020D1  |
| chr11 | 1.03E+08 | 1.03E+08 | Intergenic | Intergenic | -23573  | NM_18303 | 353047 | Plekhn1    | AP162 B2   |
| chr11 | 1.16E+08 | 1.16E+08 | promoter-1 | promoter-1 | -215    | NM_02955 | 76265  | Tsen54     | 0610034PC  |
| chr1  | 30929952 | 30930025 | Intergenic | CpG        | -9887   | NM_00108 | 213109 | Phf3       | 2310061N1  |
| chr2  | 52826352 | 52826500 | intron (NM | intron (NM | 109524  | NM_17240 | 71409  | Fmnl2      | 5430425KC  |
| chr14 | 1.06E+08 | 1.06E+08 | Intergenic | Intergenic | -61739  | NM_19860 | 212085 | Trim52     | 4921513BC  |
| chr1  | 9418052  | 9418175  | Intergenic | RMER16-in  | -117376 | NM_02151 | 59014  | Rrs1       | 5730466AC  |
| chrX  | 1.48E+08 | 1.48E+08 | intron (NM | CpG        | 198     | NM_00116 | 69499  | Tsr2       | 2310007F1  |
| chr3  | 61168502 | 61168750 | 5' UTR (NV | 5' UTR (NV | 197     | NM_02871 | 74012  | Rap2b      | 4021402C1  |
| chr10 | 13194102 | 13194175 | promoter-1 | promoter-1 | 64      | NM_00119 | 215789 | Phactr2    | AV158170   |
| chr14 | 52724302 | 52724425 | promoter-1 | promoter-1 | -660    | NM_00117 | 15381  | Hnrnpc     | AL022939   |
| chr3  | 83663577 | 83663800 | Intergenic | Intergenic | -18158  | NM_01190 | 24088  | Tlr2       | Ly105      |
| chr4  | 62186077 | 62186200 | promoter-1 | promoter-1 | -90     | NM_02149 | 59001  | Pole3      | 1810034K1  |
| chr9  | 21640202 | 21640350 | intron (NM | intron (NM | 322     | NM_00108 | 624219 | Gm6484     | Angptl8 EC |
| chr11 | 1.04E+08 | 1.04E+08 | intron (NM | intron (NM | 567     | NM_00108 | 76719  | Kansl1     | 1700081L1  |
| chr19 | 57836977 | 57837350 | intron (NM | intron (NM | 151639  | NM_18141 | 226255 | Atrnl1     | AI504415 , |
| chr6  | 1.2E+08  | 1.2E+08  | promoter-1 | promoter-1 | -854    | NM_14599 | 214899 | Kdm5a      | AA409370   |
| chr1  | 1.33E+08 | 1.33E+08 | promoter-1 | promoter-1 | -640    | NM_00882 | 18640  | Pfkfb2     | 4930568DC  |
| chr15 | 77054102 | 77054350 | intron (NM | intron (NM | -69984  | NM_00128 | 93686  | Rbfox2     | Fbm2 Fhx   |
| chr3  | 95685902 | 95687000 | promoter-1 | promoter-1 | -300    | NM_00103 | 229599 | Ciart      | Chrono Gr  |
| chr5  | 1.4E+08  | 1.4E+08  | promoter-1 | promoter-1 | 72      | NM_00125 | 77053  | Sun1       | 4632417G1  |
| chr2  | 69661002 | 69661200 | intron (NM | CpG        | 674     | NM_17778 | 277396 | Klhl23     | C130068N:  |
| chr10 | 80765327 | 80765700 | intron (NM | intron (NM | 9805    | NM_00114 | 18717  | Pip5k1c    | AI115456 , |
| chr8  | 23988852 | 23988925 | intron (NM | intron (NM | 18877   | NM_00108 | 244349 | Kat6a      | 1500036M   |
| chr19 | 21686577 | 21686825 | intron (NM | MER20 DN   | 40580   | NM_02542 | 66206  | 1110059E2- |            |
| chr9  | 1.1E+08  | 1.1E+08  | 5' UTR (NV | 5' UTR (NV | 430     | NM_01875 | 54369  | Nme6       | nm23-M6    |
| chr6  | 91657352 | 91657425 | intron (NM | intron (NM | 23327   | NM_00932 | 21366  | Slc6a6     | AA589629   |
| chr11 | 76015527 | 76015700 | promoter-1 | promoter-1 | 55      | NM_02777 | 116972 | Fam57a     | 2310047D1  |
| chrY  | 2870052  | 2870225  | Intergenic | Intergenic | 482880  | NM_00127 | 1E+08  | Gm3376     | Rbmy1b     |
| chr15 | 58247127 | 58247300 | 5' UTR (NV | 5' UTR (NV | 190     | NM_14595 | 210998 | D15Ert62   | AV220772   |
| chr13 | 22036977 | 22037425 | intron (NM | CpG        | 238     | NM_18301 | 193452 | Zfp184     | 4930500C1  |
| chr8  | 1.22E+08 | 1.22E+08 | Intergenic | Intergenic | -13461  | NM_02795 | 71839  | Osgin1     | 1700012B1  |
| chr9  | 74940127 | 74940200 | intron (NM | PB1 SINE , | 21150   | NM_01086 | 17918  | Myo5a      | 9630007J1' |
| chr18 | 34490727 | 34491050 | promoter-1 | promoter-1 | 89      | NM_02552 | 66384  | Srp19      | 2310020D2  |
| chr8  | 72735802 | 72736100 | intron (NM | CpG        | 229     | NM_00100 | 73095  | Slc25a42   | 2900084M   |
| chr2  | 34625627 | 34625775 | Intergenic | MT2B LTR   | -1909   | NM_00116 | 14828  | Hspa5      | AL022860   |
| chr10 | 31259152 | 31259450 | intron (NM | L1MA8 LIN  | 70230   | NM_00114 | 268291 | Rnf217     | AU016819   |
| chr18 | 36675327 | 36675500 | promoter-1 | promoter-1 | 46      | NM_01041 | 15200  | Hbegf      | AW047313   |

|       |          |          |             |             |         |           |        |         |            |
|-------|----------|----------|-------------|-------------|---------|-----------|--------|---------|------------|
| chr15 | 34167977 | 34168125 | 5' UTR (NM  | 5' UTR (NM  | 270     | NM_03352  | 114128 | Laptm4b | C330023P1  |
| chr16 | 23162852 | 23162950 | Intergenic  | L1_Mur3 L   | 16292   | NM_00960  | 11450  | Adipoq  | 30kDa AP   |
| chr10 | 3134402  | 3134500  | 5' UTR (NM  | 5' UTR (NM  | 147     | NM_17254  | 215748 | Cnksr3  | 6820402CC  |
| chr7  | 19766302 | 19766375 | promoter-1  | promoter-1  | -181    | NM_00116  | 72205  | Eml2    | 1600029NC  |
| chr13 | 64255277 | 64255425 | promoter-1  | promoter-1  | -844    | NM_17549  | 238673 | Zfp367  | 8030486J2  |
| chr2  | 5623452  | 5623700  | intron (NM  | GA-rich Lo  | 12232   | NM_00129  | 227541 | Camk1d  | A630059D:  |
| chr11 | 1.2E+08  | 1.2E+08  | intron (NM  | intron (NM  | 6819    | NM_00119  | 11302  | Aatk    | AATYK aat  |
| chr5  | 1.46E+08 | 1.46E+08 | promoter-1  | promoter-1  | 32      | NM_00103  | 231887 | Pdap1   | HASPP28 F  |
| chr3  | 1.26E+08 | 1.26E+08 | Intergenic  | Intergenic  | 99431   | NM_17345  | 271970 | Arsj    | 9330196J0  |
| chr3  | 88358102 | 88358200 | intron (NM  | CpG         | 513     | NM_03352  | 94232  | Ubqln4  | A1Up A1u   |
| chr16 | 45025602 | 45025725 | Intergenic  | Intergenic  | -68503  | NM_02643  | 67896  | Ccdc80  | 2610001E1  |
| chr12 | 39505102 | 39505200 | Intergenic  | Intergenic  | -1694   | NM_00796  | 14009  | Etv1    | ER81 Etsrp |
| chr11 | 1.07E+08 | 1.07E+08 | Intergenic  | Intergenic  | -12787  | NM_01065  | 16647  | Kpna2   | 2410044B1  |
| chr7  | 31609252 | 31609325 | promoter-1  | promoter-1  | -494    | NM_14618  | 233079 | Ffar2   | GPCR43 G   |
| chr7  | 1.28E+08 | 1.28E+08 | intron (NM  | CpG         | 318     | NM_00116  | 26939  | Polr3e  | RPC5 Sin   |
| chr7  | 1.49E+08 | 1.49E+08 | intron (NM  | CpG         | 176     | NM_02830  | 101513 | Mob2    | 1110017M   |
| chr15 | 73562302 | 73562475 | intron (NM  | intron (NM  | 7028    | NM_00116  | 19245  | Ptp4a3  | AV088979   |
| chr1  | 1.79E+08 | 1.79E+08 | intron (NM  | intron (NM  | 58210   | NM_01178  | 23797  | Akt3    | AI851531   |
| chr12 | 88747852 | 88747950 | Intergenic  | B2_Mm2 S    | -18721  | NM_01147  | 20773  | Sptlc2  | AI173915   |
| chr10 | 59027227 | 59027750 | intron (NM  | MIR SINE    | 51952   | NM_00103  | 215999 | Mcu     | 2010012O:  |
| chr2  | 1.27E+08 | 1.27E+08 | intron (NM  | intron (NM  | 275     | NM_00111  | 72180  | Zfp661  | 2810405KC  |
| chr2  | 35359227 | 35359350 | Intergenic  | Intergenic  | -42343  | NM_00114  | 14594  | Ggta1   | AW108479   |
| chr15 | 91021752 | 91021875 | exon (NM_   | exon (NM_   | 425     | NM_01199  | 26874  | Abcd2   | ABC39 ALL  |
| chr13 | 52710552 | 52710750 | intron (NM  | intron (NM  | 18400   | NM_01151  | 20963  | Syk     | Sykb       |
| chr1  | 1.4E+08  | 1.4E+08  | Intergenic  | ID_B1 SINI  | 154172  | NM_02160  | 59125  | Nek7    | 2810460C1  |
| chr5  | 1.24E+08 | 1.24E+08 | intron (NM  | intron (NM  | 5518    | NM_17787  | 330192 | Vps37b  | 2300007F2  |
| chr6  | 1.21E+08 | 1.21E+08 | promoter-1  | promoter-1  | -135    | NM_15351  | 94044  | Bcl2l13 | BCL-RAMB   |
| chr5  | 46248502 | 46248650 | promoter-1  | promoter-1  | 203     | NM_17814  | 209707 | Lcorl   | Mlr1       |
| chr6  | 67008977 | 67009150 | intron (NR_ | intron (NR_ | -21662  | NM_00783  | 13197  | Gadd45a | AA545191   |
| chr5  | 1.3E+08  | 1.3E+08  | intron (NM  | intron (NM  | 7978    | NM_13390  | 100678 | Psph    | AI480570   |
| chr3  | 14886527 | 14886600 | 5' UTR (NM  | 5' UTR (NM  | 137     | NM_00980  | 12349  | Car2    | AI131712 c |
| chr17 | 24941077 | 24941175 | promoter-1  | promoter-1  | -201    | NM_02919  | 75178  | Meiob   | 4930528F2  |
| chr14 | 80883977 | 80884250 | Intergenic  | Intergenic  | 484004  | NM_00103  | 380924 | Olfm4   | GC1 GW11   |
| chr17 | 15244352 | 15244650 | Intergenic  | Intergenic  | 54478   | NM_00103  | 381062 | Ermard  | 2210404J1  |
| chr5  | 1.08E+08 | 1.08E+08 | intron (NM  | intron (NM  | -51101  | NM_00126  | 14581  | Gfi1    | AW495828   |
| chr3  | 1.33E+08 | 1.33E+08 | Intergenic  | Intergenic  | 62159   | NM_02792  | 71793  | Ints12  | 1110020M   |
| chr2  | 32549602 | 32549700 | promoter-1  | promoter-1  | 44      | NM_01023  | 14287  | Fpgs    | AA408187   |
| chr8  | 1.14E+08 | 1.14E+08 | promoter-1  | promoter-1  | -804    | NM_14621  | 234736 | Rfwd3   | BC027246   |
| chr7  | 1.4E+08  | 1.4E+08  | Intergenic  | Intergenic  | 115943  | NM_01697  | 18242  | Oat     | AI194874   |
| chr4  | 7013377  | 7013500  | Intergenic  | IAPEY3-int  | -95568  | NM_14571  | 252838 | Tox     | 1700007F0  |
| chr2  | 1.73E+08 | 1.73E+08 | Intergenic  | Intergenic  | -101329 | NM_02299  | 65112  | Pmepa1  | 221041810: |
| chr9  | 60642552 | 60642650 | intron (NM  | CpG         | 246     | NM_02828  | 72565  | Uaca    | 2700059DC  |
| chr11 | 77795677 | 77795750 | promoter-1  | promoter-1  | -605    | NM_17485  | 268448 | Phf12   | 2410142K1  |
| chr9  | 1.01E+08 | 1.01E+08 | exon (NM_   | exon (NM_   | 24465   | NM_00110  | 77853  | Msl2    | E130103E0  |
| chr16 | 11173752 | 11174075 | intron (NR_ | intron (NR_ | 2573    | NR_02750: | 106205 | Zc3h7a  | A430104C1  |
| chr6  | 1E+08    | 1E+08    | Intergenic  | Intergenic  | -24086  | NM_01974  | 56353  | Rybp    | 2410018J2: |
| chr1  | 1.66E+08 | 1.66E+08 | promoter-1  | promoter-1  | -31     | NM_01134  | 20343  | Sell    | AI528707 c |

|       |          |          |             |             |        |           |        |         |            |
|-------|----------|----------|-------------|-------------|--------|-----------|--------|---------|------------|
| chr10 | 33670477 | 33670775 | intron (NM  | intron (NM  | 392    | NM_02828  | 72580  | Zufsp   | 2700019DC  |
| chr7  | 52074352 | 52074500 | intron (NM  | intron (NM  | -2398  | NR_033136 | 107503 | Atf5    | AFTA Atf7  |
| chr13 | 89879027 | 89879175 | intron (NM  | CpG         | 3016   | NM_00108  | 13003  | Vcan    | 5430420NC  |
| chr16 | 31233902 | 31233975 | intron (NR_ | intron (NR_ | -32614 | NM_03013  | 78618  | Acap2   | 4832442G1  |
| chr5  | 77739527 | 77739725 | promoter-1  | promoter-1  | 117    | NM_15379  | 231329 | Polr2b  | Pol2rb Rpt |
| chr6  | 1.18E+08 | 1.18E+08 | Intergenic  | Intergenic  | -52135 | NM_00117  | 108017 | Fxyd4   | 061000810  |
| chr5  | 21241152 | 21241350 | Intergenic  | L1M2 LINE   | -1727  | NM_02843  | 73078  | Pmpcb   | 311000401  |
| chr18 | 39669502 | 39669600 | Intergenic  | L1ME1 LIN   | -22652 | NM_00817  | 14815  | Nr3c1   | GR Grl-1 C |
| chr17 | 46142577 | 46142725 | Intergenic  | Intergenic  | 19461  | NM_00111  | 22339  | Vegfa   | Vegf Vpf   |
| chr4  | 1.3E+08  | 1.3E+08  | Intergenic  | Intergenic  | -9445  | NM_19895  | 230777 | Hcrtr1  | Ox1r       |
| chr6  | 1.25E+08 | 1.25E+08 | intron (NM  | intron (NM  | 13160  | NM_00765  | 12527  | Cd9     | Tspan29    |
| chr4  | 1.34E+08 | 1.34E+08 | promoter-1  | promoter-1  | -320   | NM_01695  | 15331  | Hmgn2   | HMG-17 H   |
| chr9  | 1.03E+08 | 1.03E+08 | 5' UTR (NM  | 5' UTR (NM  | 458    | NM_00113  | 321022 | Cdv3    | 2510010F1  |
| chr8  | 18948677 | 18948825 | intron (NM  | intron (NM  | 2120   | NM_00128  | 319581 | Xkr5    | 5430438HC  |
| chr6  | 1E+08    | 1E+08    | promoter-1  | promoter-1  | -436   | NM_01974  | 56353  | Rybp    | 2410018J2  |
| chr1  | 1.33E+08 | 1.33E+08 | intron (NM  | intron (NM  | 45754  | NM_01875  | 54354  | Rassf5  | 1300019G2  |
| chr1  | 94829702 | 94829950 | TTS (NR_01  | TTS (NR_01  | -1159  | NM_01179  | 23830  | Capn10  | AW049679   |
| chr11 | 53321677 | 53321750 | Intergenic  | Intergenic  | -11525 | NM_03314  | 20362  | 8-Sep   | AW046166   |
| chr17 | 35338077 | 35338250 | intron (NM  | intron (NM  | 789    | NM_01369  | 21926  | Tnf     | DIF TNF-a  |
| chr4  | 59795777 | 59796000 | intron (NM  | B4A SINE    | 839    | NM_00101  | 66209  | Inip    | 1110054OC  |
| chr1  | 89657452 | 89657675 | intron (NM  | intron (NM  | 4977   | NM_00120  | 77040  | Atg16l1 | 1500009KC  |
| chr14 | 64950452 | 64950625 | intron (NM  | intron (NM  | 85255  | NM_00125  | 110265 | MsrA    | 2310045J2  |
| chr5  | 65252877 | 65253000 | Intergenic  | Intergenic  | 58176  | NM_00845  | 16599  | Klf3    | 9930027GC  |
| chr2  | 1.47E+08 | 1.47E+08 | promoter-1  | promoter-1  | -383   | NM_01191  | 24128  | Xrn2    | -          |
| chr1  | 1.3E+08  | 1.3E+08  | Intergenic  | L1MC3 LIN   | 78975  | NM_00991  | 12767  | Cxcr4   | CD184 Cm   |
| chr10 | 1.2E+08  | 1.2E+08  | promoter-1  | promoter-1  | -683   | NM_02867  | 73914  | Irak3   | 4833428C1  |
| chr3  | 86562702 | 86562975 | intron (NM  | intron (NM  | 161968 | NM_00119  | 70762  | Dclk2   | 6330415M   |
| chr7  | 19680102 | 19680300 | exon (NM_   | exon (NM_   | 308    | NM_01138  | 20475  | Six5    | Dmahp MI   |
| chr16 | 22265527 | 22265600 | intron (NM  | CpG         | 439    | NM_00918  | 20462  | Tra2b   | 5730405G2  |
| chr3  | 97736002 | 97736150 | intron (NM  | intron (NM  | 1980   | NM_00103  | 433632 | Gm5544  | EG433632   |
| chr15 | 97679577 | 97680200 | Intergenic  | Intergenic  | -4955  | NM_00120  | 56233  | Hdac7   | 5830434KC  |
| chr4  | 46761877 | 46762050 | intron (NM  | intron (NM  | -98892 | NM_19866  | 381605 | Tbc1d2  | A630005AC  |
| chr6  | 1.38E+08 | 1.38E+08 | 5' UTR (NM  | 5' UTR (NM  | 198    | NM_01149  | 20901  | Strap   | AW557906   |
| chr4  | 1.28E+08 | 1.28E+08 | promoter-1  | promoter-1  | -227   | NM_00119  | 54383  | Phc2    | A3galt2 A/ |
| chr7  | 1.35E+08 | 1.35E+08 | promoter-1  | promoter-1  | 401    | NM_17228  | 233900 | Rnf40   | AI848422 I |
| chr7  | 1.09E+08 | 1.09E+08 | intron (NM  | intron (NM  | 6893   | NM_00104  | 69710  | Arap1   | 2410002L1  |
| chr7  | 1.14E+08 | 1.14E+08 | Intergenic  | Intergenic  | -7392  | NM_00127  | 434223 | Gm1966  | -          |
| chrX  | 1.03E+08 | 1.03E+08 | Intergenic  | MLT2F LTF   | -8276  | NM_20582  | 279572 | Tlr13   | AI666735 I |
| chr10 | 20710277 | 20710775 | intron (NM  | intron (NM  | 38173  | NM_02620  | 52906  | Ahi1    | 1700015F0  |
| chr6  | 29559802 | 29559875 | promoter-1  | promoter-1  | -231   | NM_17729  | 320938 | Tnpo3   | 5730544L1  |
| chr3  | 1.06E+08 | 1.06E+08 | intron (NM  | intron (NM  | 10655  | NM_02811  | 72121  | Dennd2d | 2010308M   |
| chr2  | 1.81E+08 | 1.81E+08 | intron (NR_ | CpG         | 204    | NM_00129  | 66314  | Tpd52l2 | 2810411G2  |
| chr1  | 1.57E+08 | 1.57E+08 | intron (NM  | intron (NM  | 48037  | NM_00978  | 12290  | Cacna1e | A430040I1  |
| chr9  | 1.23E+08 | 1.23E+08 | promoter-1  | promoter-1  | -18    | NM_02533  | 66079  | Tmem42  | 0610027O1  |
| chr4  | 1.29E+08 | 1.29E+08 | exon (NM_   | exon (NM_   | 146    | NM_01131  | 20218  | Khdrbs1 | Sam68 p62  |
| chr14 | 46366352 | 46366425 | Intergenic  | Intergenic  | -88570 | NM_00104  | 114874 | Ddhd1   | PA-PLA1    |
| chr9  | 44142802 | 44142950 | promoter-1  | promoter-1  | 78     | NM_01043  | 15270  | H2afx   | AW228881   |



|       |          |          |                      |         |           |        |            |            |
|-------|----------|----------|----------------------|---------|-----------|--------|------------|------------|
| chr4  | 56960102 | 56960300 | promoter-1promoter-1 | 100     | NM_17551  | 242474 | Tmem245    | A630051L1  |
| chr8  | 34776802 | 34777000 | intron (NM           | 13191   | NM_01034  | 14782  | Gsr        | AI325518   |
| chr1  | 44175452 | 44175525 | 5' UTR (NM           | 130     | NM_02364  | 72050  | Kdelc1     | 1810049A1  |
| chr8  | 74846352 | 74846500 | TTS (NM_0            | 3465    | NM_00845  | 16598  | Klf2       | Lklf       |
| chr17 | 56483052 | 56483175 | intron (NM           | 17640   | NM_17213  | 193796 | Kdm4b      | 4732474L0  |
| chr10 | 1.19E+08 | 1.19E+08 | promoter-1promoter-1 | -365    | NM_02799  | 71902  | Cand1      | 23100380C  |
| chr13 | 99717702 | 99717800 | Intergenic           | -21412  | NM_17871  | 238799 | Tnp01      | AU021749   |
| chr10 | 20294802 | 20295125 | intron (NM           | 149911  | NM_01387  | 29863  | Pde7b      | -          |
| chr7  | 86903177 | 86903375 | intron (NM           | 15227   | NM_00103  | 626359 | Wdr93      | EG626359   |
| chr3  | 60300002 | 60300375 | intron (NM           | -4986   | NM_00125  | 56758  | Mbnl1      | Mbnl mKI/  |
| chr15 | 55697927 | 55698100 | intron (NM           | 40491   | NM_01666  | 20649  | Sntb1      | -          |
| chr3  | 5860452  | 5860850  | Intergenic           | -284403 | NM_00116  | 19302  | Pex2       | D3ErtD138i |
| chrX  | 98352827 | 98353100 | intron (NML2 LINE L2 | 64939   | NM_00111  | 55988  | Snx12      | 2610001F0  |
| chr11 | 1.15E+08 | 1.15E+08 | Intergenic           | -4992   | NM_00108  | 237988 | Cdr2l      | D030068L2  |
| chr6  | 1.14E+08 | 1.14E+08 | intron (NM           | 15802   | NM_00111  | 108960 | Irak2      | 6330415L0  |
| chr16 | 17201377 | 17201475 | intron (NM           | 159     | NM_00945  | 22195  | Ube2l3     | C79827 Uk  |
| chr14 | 46286902 | 46287125 | Intergenic           | -9195   | NM_00104  | 114874 | Ddhd1      | PA-PLA1    |
| chr14 | 32482977 | 32483175 | Intergenic           | 28833   | NM_02529  | 26363  | Btd        | -          |
| chr11 | 1.18E+08 | 1.18E+08 | Intergenic           | -19355  | NM_00116  | 69926  | Dnah17     | 2810003K2  |
| chr4  | 34497927 | 34498000 | promoter-1promoter-1 | 99      | NM_00100  | 433693 | Akirin2    | 2700059D2  |
| chr6  | 7783702  | 7783900  | Intergenic           | -11423  | NM_05299  | 94192  | C1galt1    | 2210410E0  |
| chr5  | 1.3E+08  | 1.3E+08  | intron (NM           | 3134    | NM_00128  | 13852  | Stx2       | AW538950   |
| chr15 | 6361602  | 6361675  | intron (NM           | 24890   | NM_00110  | 13132  | Dab2       | 5730435J1  |
| chr8  | 69384852 | 69385150 | intron (NM           | 885     | NM_00116  | 234344 | Naf1       | Gm174      |
| chr13 | 1.11E+08 | 1.11E+08 | Intergenic           | -6758   | NM_17771  | 238875 | Gapt       | 9830130M   |
| chr1  | 1.09E+08 | 1.09E+08 | Intergenic           | -1649   | NM_00117  | 18788  | Serpinb2   | PAI-2 Plan |
| chr1  | 94079802 | 94080125 | Intergenic           | -34993  | NM_20722  | 208727 | Hdac4      | 4932408F1  |
| chr1  | 58770002 | 58770200 | promoter-1promoter-1 | -29     | NM_00980  | 12633  | Cflar      | 2310024N1  |
| chr15 | 63932202 | 63932375 | intron (NM           | -40278  | NM_14484  | 223601 | Fam49b     | 0910001AC  |
| chr3  | 1.46E+08 | 1.46E+08 | intron (NM           | 2338    | NM_01031  | 14707  | Gng5       | G(y)5      |
| chr2  | 1.05E+08 | 1.05E+08 | intron (NM           | 493     | NM_17719  | 320554 | Tcp11l1    | C130096DC  |
| chr8  | 4323902  | 4324125  | intron (NM           | 1087    | NM_01048  | 15568  | Elavl1     | 2410055NC  |
| chr13 | 1.11E+08 | 1.11E+08 | intron (NM           | 60888   | NM_02385  | 67295  | Rab3c      | 2700062I0: |
| chr19 | 6276177  | 6276650  | promoter-1promoter-1 | -483    | NM_01011  | 13660  | Ehd1       | AA409636   |
| chr5  | 1.36E+08 | 1.36E+08 | promoter-1promoter-1 | 333     | NM_00128  | 76571  | Styxl1     | 1700011C1  |
| chr15 | 57907602 | 57907675 | intron (NM           | 425     | NM_00104  | 22770  | Zhx1       | -          |
| chr17 | 79162627 | 79162825 | intron (NM           | -26826  | NM_01150  | 268980 | Strn       | AU022939   |
| chr2  | 1.54E+08 | 1.54E+08 | intron (NM           | 1551    | NM_02936  | 75608  | Chmp4b     | 2010012F0  |
| chr2  | 1.26E+08 | 1.26E+08 | promoter-1promoter-1 | 89      | NM_02945  | 75823  | Fam227b    | 4930525F2  |
| chr16 | 4984977  | 4985050  | Intergenic           | 12932   | NM_02766  | 71089  | 12-Sep     | 1700028GC  |
| chr2  | 32464977 | 32465100 | intron (NM           | 2533    | NR_110347 | 50935  | St6galnac6 | ST6GalNAc  |
| chrX  | 35995552 | 35995625 | Intergenic           | -7268   | NM_02155  | 59048  | C1galt1c1  | 1500002I1: |
| chr9  | 57493252 | 57493475 | promoter-1promoter-1 | -376    | NM_00778  | 12988  | Csk        | AW212630   |
| chr8  | 1.24E+08 | 1.24E+08 | 3' UTR (NM           | 33081   | NM_14560  | 234825 | Klhdc4     | AA408426   |
| chr18 | 65047752 | 65047975 | intron (NM           | 453     | NM_00111  | 83814  | Nedd4l     | 1300012CC  |
| chr10 | 1.17E+08 | 1.17E+08 | intron (NM           | 278     | NM_00101  | 432508 | Cpsf6      | 4733401N1  |
| chr19 | 5877777  | 5878075  | promoter-1promoter-1 | -540    | NM_13415  | 107375 | Slc25a45   | AW491445   |

|       |          |          |            |             |         |          |        |           |             |
|-------|----------|----------|------------|-------------|---------|----------|--------|-----------|-------------|
| chr1  | 1.79E+08 | 1.79E+08 | Intergenic | Intergenic  | 49224   | NM_01391 | 30928  | Zbtb18    | RP58 Zfp2   |
| chr10 | 79391177 | 79391500 | intron (NM | intron (NM  | 1252    | NM_00128 | 13496  | Arid3a    | Bright Dri1 |
| chr4  | 1.27E+08 | 1.27E+08 | exon (NM_  | exon (NM_   | 731     | NM_02360 | 71514  | Sfpq      | 1110004P2   |
| chr8  | 11550752 | 11550900 | promoter-1 | promoter-1  | -55     | NM_02424 | 71941  | Cars2     | 2310051N1   |
| chr13 | 36041902 | 36042025 | Intergenic | Charlie1a l | -17812  | NM_02962 | 76487  | Ppp1r3g   | 1600032L1   |
| chr17 | 56357977 | 56358300 | intron (NM | (CGCGG)n    | 174     | NM_17262 | 224897 | Dpp9      | 6430584G1   |
| chr11 | 26287077 | 26287325 | non-coding | non-coding  | 117     | NR_10238 | 67030  | Fancl     | 2010322C1   |
| chr14 | 32968002 | 32968350 | intron (NM | intron (NM  | -4897   | NM_00103 | 27057  | Ncoa4     | ARA70 Rfg   |
| chr2  | 1.28E+08 | 1.28E+08 | intron (NM | CpG         | 527     | NM_00975 | 12125  | Bcl2l11   | 1500006F2   |
| chrX  | 1.37E+08 | 1.37E+08 | intron (NM | intron (NM  | 1396    | NM_02146 | 19139  | Prps1     | 2310010D1   |
| chr8  | 33039602 | 33039800 | Intergenic | Intergenic  | -11026  | NM_17859 | 211323 | Nrg1      | 6030402G2   |
| chr4  | 53790577 | 53790775 | Intergenic | Intergenic  | -1901   | NM_00931 | 21350  | Tal2      | bHLHa19     |
| chr7  | 1.47E+08 | 1.47E+08 | intron (NM | intron (NM  | 659     | NM_05311 | 93747  | Echs1     | C80529      |
| chr1  | 92499827 | 92500150 | promoter-1 | promoter-1  | -12     | NM_13380 | 108679 | Cops8     | 9430009J0   |
| chr13 | 3536927  | 3537075  | promoter-1 | promoter-1  | -320    | NM_00811 | 14569  | Gdi2      | GDI-B GDII  |
| chr16 | 49836877 | 49837250 | Intergenic | Intergenic  | -18704  | NM_01058 | 16423  | Cd47      | 9130415E2   |
| chr1  | 36603602 | 36603675 | intron (NM | intron (NM  | 408     | NM_02624 | 109346 | Ankrd39   | 9130416NC   |
| chr3  | 1.21E+08 | 1.21E+08 | Intergenic | Intergenic  | -15964  | NM_14539 | 213603 | Slc44a3   | BC010552    |
| chr8  | 74117152 | 74117475 | intron (NM | ID_B1 SIN   | 1230    | NM_00129 | 66171  | Pgls      | 1110030KC   |
| chr8  | 4253152  | 4253300  | exon (NM_  | exon (NM_   | 124     | NM_13396 | 102209 | Snapc2    | 0610007H1   |
| chr2  | 34912877 | 34912950 | exon (NM_  | exon (NM_   | 4048    | NM_01040 | 15139  | Hc        | C5 C5a He   |
| chr15 | 91009627 | 91009700 | exon (NM_  | exon (NM_   | 12575   | NM_01199 | 26874  | Abcd2     | ABC39 ALI   |
| chr1  | 1.83E+08 | 1.83E+08 | Intergenic | Intergenic  | -20442  | NM_14551 | 226757 | Wdr26     | 1600024AC   |
| chr8  | 98430577 | 98430775 | Intergenic | Intergenic  | -18411  | NM_01032 | 14719  | Got2      | AL022787    |
| chr5  | 1.44E+08 | 1.44E+08 | intron (NM | CpG         | 273     | NM_00900 | 19353  | Rac1      | AL023026    |
| chr12 | 1.1E+08  | 1.1E+08  | promoter-1 | promoter-1  | 83      | NM_00116 | 22375  | Wars      | TrpRS WR5   |
| chr1  | 1.34E+08 | 1.34E+08 | Intergenic | Intergenic  | 18435   | NM_01192 | 26361  | Avpr1b    | AVPR3 V3/   |
| chr8  | 1.26E+08 | 1.26E+08 | intron (NM | intron (NM  | -10473  | NM_17228 | 234865 | Nup133    | mermaid     |
| chr1  | 1.65E+08 | 1.65E+08 | intron (NM | intron (NM  | 6617    | NM_01888 | 55990  | Fmo2      | 2310008DC   |
| chr16 | 23127627 | 23127725 | intron (NM | intron (NM  | 127     | NM_14548 | 106344 | Rfc4      | A1 AI8941   |
| chr2  | 1.53E+08 | 1.53E+08 | intron (NM | B1_Mus1 :   | -15674  | NM_13384 | 99237  | Tm9sf4    | AA986553    |
| chr9  | 65732802 | 65733025 | promoter-1 | promoter-1  | 67      | NM_00117 | 56404  | Trip4     | 4930558E0   |
| chr14 | 45938202 | 45938400 | promoter-1 | promoter-1  | -54     | NM_01577 | 50527  | Ero1l     | ERO1-L      |
| chr14 | 32409552 | 32409625 | Intergenic | Intergenic  | -19019  | NM_00993 | 382864 | Colq      | A130034K2   |
| chr16 | 88480552 | 88480925 | Intergenic | Intergenic  | 26485   | NM_18149 | 239931 | Cldn17    | -           |
| chr7  | 19460052 | 19460200 | Intergenic | Intergenic  | -9913   | NM_00940 | 21946  | Pglyrp1   | PGRP PGR    |
| chr2  | 1.01E+08 | 1.01E+08 | Intergenic | MLT1A0 L    | -808767 | NM_00902 | 19374  | Rag2      | Rag-2       |
| chr14 | 33583902 | 33584000 | Intergenic | Intergenic  | -15198  | NM_00116 | 69069  | 1810011H1 | 4733401I0!  |
| chr4  | 74224827 | 74225025 | Intergenic | Intergenic  | 327143  | NM_14478 | 76804  | Kdm4c     | 2410141F1   |
| chr13 | 53072077 | 53072425 | intron (NM | intron (NM  | 4157    | NM_01737 | 18030  | Nfil3     | AV225605    |
| chr14 | 62047002 | 62047125 | intron (NM | RSINE1 SIN  | 11721   | NM_00846 | 16648  | Kpna3     | IPOA4       |
| chr10 | 21714102 | 21714300 | promoter-1 | promoter-1  | -271    | NM_01136 | 20393  | Sgk1      | Sgk         |
| chr6  | 1.49E+08 | 1.49E+08 | intron (NM | CpG         | 1341    | NM_01964 | 56306  | Fam60a    | Ppcs1 Pptc  |
| chr19 | 53393552 | 53393700 | intron (NM | intron (NM  | 8630    | NM_00100 | 17859  | Mxi1      | ENSMUSGC    |
| chr11 | 1.03E+08 | 1.03E+08 | intron (NM | CpG-2675    | 12935   | NM_00111 | 11488  | Adam11    | AW060611    |
| chr13 | 45422052 | 45422150 | Intergenic | Intergenic  | -63010  | NM_15378 | 218203 | Myliip    | 9430057C2   |
| chr3  | 1.33E+08 | 1.33E+08 | Intergenic | Intergenic  | -82197  | NM_00104 | 214133 | Tet2      | Ayu17-449   |

|       |          |          |            |            |         |           |        |         |             |
|-------|----------|----------|------------|------------|---------|-----------|--------|---------|-------------|
| chr16 | 32395927 | 32396075 | Intergenic | Intergenic | -4591   | NM_00116  | 277203 | Tm4sf19 | EG277203    |
| chr13 | 41568852 | 41569200 | intron (NM | intron (NM | 13703   | NM_00111  | 18003  | Nedd9   | Cas-L CasL  |
| chr6  | 1.4E+08  | 1.4E+08  | intron (NM | intron (NM | 90881   | NM_14492  | 109135 | Plekha5 | 2810431N2   |
| chr4  | 32855202 | 32855375 | intron (NM | intron (NM | -31946  | NM_17536  | 108755 | Lymr2   | 2610208E0   |
| chr8  | 1.07E+08 | 1.07E+08 | promoter-1 | promoter-1 | 349     | NM_14493  | 234664 | Nae1    | 59kDa App   |
| chr7  | 17497702 | 17498125 | Intergenic | Intergenic | 6074    | NM_00896  | 19222  | Ptgir   | IP PGI2     |
| chr5  | 74036527 | 74036600 | intron (NM | intron (NM | 2407    | NM_01189  | 24051  | Sgcb    | 43kDa AI7.  |
| chr6  | 88784977 | 88785150 | TTS (NM_0  | TTS (NM_0  | 6866    | NM_03025  | 80283  | Abtb1   | AI847549 I  |
| chr5  | 1.38E+08 | 1.38E+08 | Intergenic | (CGG)n Sir | -7844   | NM_02875  | 74097  | Pop7    | 0610037N1   |
| chr7  | 1.1E+08  | 1.1E+08  | intron (NM | intron (NM | 258     | NM_00108  | 20821  | Trim21  | Ro52 Ssa1   |
| chr14 | 73522252 | 73522500 | Intergenic | Intergenic | -19941  | NM_00117  | 105670 | Rcbtb2  | 2610028E0   |
| chr1  | 1.07E+08 | 1.07E+08 | Intergenic | Intergenic | 186711  | NM_17877  | 320311 | Rnf152  | A930029BC   |
| chr1  | 93356252 | 93356550 | promoter-1 | promoter-1 | -496    | NM_01106  | 18627  | Per2    | mKIAA034:   |
| chr7  | 1.16E+08 | 1.16E+08 | exon (NM_  | exon (NM_  | 247     | NM_02534  | 66085  | Eif3f   | 0610037M    |
| chr17 | 33821477 | 33821550 | intron (NM | intron (NM | 890     | NM_00110  | 76936  | Hnrnpm  | 2610023M    |
| chr5  | 1.06E+08 | 1.06E+08 | Intergenic | Intergenic | -45575  | NM_00112  | 231549 | Lrrc8d  | 2810473GC   |
| chr10 | 55147002 | 55147175 | Intergenic | Intergenic | -679635 | NM_00116  | 73390  | Msl3l2  | 1700060H1   |
| chr9  | 50165352 | 50165625 | Intergenic | Intergenic | -137142 | NM_02963  | 76509  | Plet1   | 0610037B2   |
| chr2  | 75521377 | 75521625 | intron (NM | intron (NM | 21197   | NM_01090  | 18024  | Nfe2l2  | AI194320 I  |
| chr1  | 1.45E+08 | 1.45E+08 | Intergenic | Intergenic | -303576 | NM_02002  | 26878  | B3galt2 | -           |
| chr19 | 25035952 | 25036050 | exon (NM_  | exon (NM_  | 105     | NR_033744 | 226043 | Cbwd1   | AV349248    |
| chr8  | 13758202 | 13758275 | intron (NM | intron (NM | 548     | NM_02727  | 69957  | Cdc16   | 2700071J1   |
| chr13 | 37148602 | 37148825 | Intergenic | Intergenic | -6600   | NM_00116  | 74145  | F13a1   | 120001410:  |
| chr17 | 48061202 | 48061275 | 5' UTR (NM | 5' UTR (NM | 343     | NM_02876  | 74123  | Foxp4   | 1200010KC   |
| chr14 | 73181227 | 73181425 | Intergenic | Intergenic | -71516  | NM_20763  | 319448 | Fndc3a  | 1700094E1   |
| chr4  | 1.55E+08 | 1.55E+08 | Intergenic | CpG        | 64027   | NM_00108  | 76866  | Morn1   | 2900057D2   |
| chr1  | 1.75E+08 | 1.75E+08 | Intergenic | Lx8 LINE L | 43664   | NM_00876  | 18313  | Olfr16  | MOR23 M     |
| chr1  | 65223602 | 65223800 | intron (NM | intron (NM | 2015    | NM_01049  | 15926  | ldh1    | AI314845 ,  |
| chr2  | 32612977 | 32613075 | exon (NM_  | exon (NM_  | 272     | NM_15280  | 30933  | Tor2a   | Prosalusin  |
| chr13 | 1.03E+08 | 1.03E+08 | Intergenic | RMER30 D   | -27250  | NM_00853  | 17079  | Cd180   | F630107B1   |
| chr1  | 1.78E+08 | 1.78E+08 | intron (NM | CpG        | 217     | NM_01201  | 26909  | Exo1    | 5730442GC   |
| chr19 | 8741502  | 8741700  | intron (NM | intron (NM | 3106    | NM_00111  | 12669  | Chrm1   | Chrm-1 M:   |
| chr13 | 31097127 | 31097200 | Intergenic | MTD LTR I  | -31247  | NM_02558  | 66482  | Exoc2   | 2410030I2:  |
| chr16 | 10768777 | 10768875 | Intergenic | GA-rich Lo | 16803   | NM_00989  | 12703  | Socs1   | Cish1 Cish' |
| chr3  | 97705477 | 97705650 | intron (NM | intron (NM | 413     | NM_01134  | 20333  | Sec22b  | 4930564D1   |
| chr10 | 85420302 | 85420450 | exon (NM_  | exon (NM_  | 162     | NM_14542  | 28088  | Rtcb    | AI255213 ,  |
| chr12 | 53107252 | 53107425 | intron (NM | CpG        | 150     | NM_02954  | 328092 | Dtd2    | 4930578F0   |
| chr5  | 1.15E+08 | 1.15E+08 | intron (NM | intron (NM | 26428   | NM_00100  | 433940 | Fam222a | -           |
| chr1  | 1.66E+08 | 1.66E+08 | intron (NM | intron (NM | 17523   | NM_00972  | 11931  | Atp1b1  | Atp4b Atp   |
| chr12 | 16627152 | 16627400 | Intergenic | Intergenic | -30700  | NM_17295  | 14245  | Lpin1   | 4631420PC   |
| chr5  | 77380027 | 77380225 | promoter-1 | promoter-1 | -310    | NM_02593  | 67054  | Paics   | 261051110:  |
| chr14 | 65568452 | 65568625 | promoter-1 | promoter-1 | 146     | NM_17733  | 219150 | Hmbox1  | AI451877 ,  |
| chr12 | 80747952 | 80748050 | intron (NM | intron (NM | 349663  | NM_00125  | 19363  | Rad51b  | AI553500 I  |
| chr1  | 1.48E+08 | 1.48E+08 | Intergenic | MLT2C1 L1  | -158470 | NM_15353  | 215378 | Brinp3  | B830045N:   |
| chr1  | 94694402 | 94694525 | Intergenic | Intergenic | -33800  | NM_01669  | 14733  | Gpc1    | AI462976    |
| chr9  | 1.06E+08 | 1.06E+08 | intron (NM | intron (NM | 331     | NM_00908  | 19944  | Rpl29   | Rpl43       |
| chr11 | 59928377 | 59928450 | intron (NM | intron (NM | 9898    | NM_00902  | 19377  | Rai1    | Gt1         |

|       |          |          |            |            |        |          |        |            |            |
|-------|----------|----------|------------|------------|--------|----------|--------|------------|------------|
| chr1  | 1.94E+08 | 1.94E+08 | intron (NM | intron (NM | 124929 | NM_01060 | 16510  | Kcnh1      | EAG1 Kv1C  |
| chr4  | 1.55E+08 | 1.55E+08 | promoter-1 | promoter-1 | -87    | NM_00119 | 67513  | 2610002J0  | Faup20     |
| chr19 | 3540402  | 3540550  | intron (NM | intron (NM | 35273  | NM_00116 | 52036  | Ppp6r3     | 4930528G0  |
| chr11 | 67399802 | 67400175 | promoter-1 | promoter-1 | -14    | NM_00110 | 14457  | Gas7       | AW124766   |
| chr9  | 70153377 | 70153500 | intron (NM | intron (NM | 98281  | NM_18107 | 71602  | Myo1e      | 2310020N2  |
| chr7  | 87520727 | 87521075 | Intergenic | Intergenic | -4640  | NM_17290 | 140481 | Man2a2     | 1700052O2  |
| chr6  | 54077527 | 54077650 | intron (NM | intron (NM | 87662  | NM_00116 | 69993  | Chn2       | 1700026N2  |
| chr5  | 91310752 | 91310925 | Intergenic | Intergenic | -9433  | NM_00817 | 14825  | Cxcl1      | Fsp Gro1 I |
| chr11 | 1.14E+08 | 1.14E+08 | Intergenic | Intergenic | -12384 | NM_00116 | 56699  | Cdc42ep4   | 1500041M   |
| chr9  | 20953952 | 20954100 | intron (NM | B4A SINE   | 324    | NM_01674 | 12539  | Cdc37      | p50 p50Cc  |
| chr14 | 51515852 | 51516175 | Intergenic | ID4_ SINE  | -3083  | NM_00116 | 546611 | Klh133     | EG546611   |
| chr17 | 46439027 | 46439275 | intron (NM | MIRb SINE  | 4274   | NM_00128 | 106565 | Dlk2       | AI413481 I |
| chr8  | 97190877 | 97191025 | promoter-1 | promoter-1 | -40    | NM_02426 | 107566 | Arl2bp     | 1700010P1  |
| chr4  | 1.34E+08 | 1.34E+08 | intron (NM | CpG        | 391    | NM_01964 | 16765  | Stmn1      | 19k Lag La |
| chr4  | 45354877 | 45355125 | promoter-1 | promoter-1 | 28     | NM_15316 | 242418 | Dcaf10     | AA959934   |
| chr13 | 6635777  | 6636075  | intron (NM | intron (NM | 12091  | NM_01970 | 56421  | Pfcp       | 1200015H2  |
| chr8  | 88005727 | 88005875 | Intergenic | Intergenic | -10715 | NM_17386 | 108682 | Gpt2       | 4631422CC  |
| chr12 | 73637102 | 73637850 | 5' UTR (NV | 5' UTR (NV | 132    | NM_02632 | 67708  | Pcnxl4     | 1810048J1  |
| chr11 | 1.01E+08 | 1.01E+08 | promoter-1 | promoter-1 | 71     | NM_14482 | 69684  | Aarsd1     | 1110069E2  |
| chr19 | 44000752 | 44001000 | intron (NM | ID_B1 SINI | 13812  | NM_02802 | 71972  | Dnmbp      | 2410003L0  |
| chr5  | 1.04E+08 | 1.04E+08 | Intergenic | Intergenic | -25437 | NM_00116 | 74218  | 1700016H1- |            |
| chr1  | 36766502 | 36766625 | intron (NM | CpG        | 207    | NM_14610 | 226977 | Actr1b     | 2310066K2  |
| chr1  | 1.46E+08 | 1.46E+08 | promoter-1 | promoter-1 | -416   | NM_00103 | 69367  | Glrx2      | 1700010P2  |
| chr15 | 74759477 | 74759550 | Intergenic | Intergenic | -25968 | NM_00116 | 17069  | Ly6e       | 9804 Ly67  |
| chr7  | 29123352 | 29123450 | exon (NM_  | exon (NM_  | 337    | NM_01367 | 20924  | Supt5      | AL033283   |
| chr7  | 1.34E+08 | 1.34E+08 | Intergenic | Intergenic | -4795  | NM_13368 | 67375  | Qprt       | 2410027J0  |
| chr3  | 51149552 | 51149675 | Intergenic | (GAA)n Sin | -5047  | NM_02350 | 69257  | Elf2       | 2610036A2  |
| chr3  | 40820802 | 40820975 | Intergenic | L1MEf LIN  | 66080  | NM_02755 | 70804  | Pgrmc2     | 4631434O1  |
| chr1  | 40691502 | 40691775 | Intergenic | Intergenic | -46919 | NM_00103 | 226999 | Slc9a2     | 2210416H1  |
| chr18 | 75057052 | 75057550 | Intergenic | Intergenic | 63616  | NM_01072 | 16891  | Lipg       | 3110013K0  |
| chr14 | 66915627 | 66915950 | promoter-1 | promoter-1 | -74    | NM_02997 | 66854  | Trim35     | 0710005M   |
| chr14 | 27783777 | 27783900 | promoter-1 | promoter-1 | -101   | NM_14522 | 72993  | Appl1      | 2900057D2  |
| chr3  | 9250327  | 9250425  | promoter-1 | promoter-1 | -191   | NM_17766 | 229055 | Zbtb10     | 4832414A1  |
| chr3  | 90391177 | 90391325 | Intergenic | Intergenic | -2918  | NM_00119 | 628324 | S100a2     | CaN19 EG6  |
| chr3  | 85794052 | 85794125 | Intergenic | Intergenic | 12325  | NM_00100 | 368202 | Prss48     | Esspl Gm1  |
| chr15 | 96486177 | 96486350 | Intergenic | ORR1D2 L   | -12919 | NM_00116 | 105727 | Slc38a1    | AA408026   |
| chr14 | 8913252  | 8913550  | intron (NM | intron (NM | 574    | NM_02593 | 67053  | Rpp14      | 2610511E0  |
| chr12 | 83626002 | 83626425 | Intergenic | Intergenic | -91812 | NM_01581 | 50779  | Rgs6       | -          |
| chr10 | 62383877 | 62384075 | intron (NM | intron (NM | 595    | NM_17519 | 73132  | Slc25a16   | 3110021G1  |
| chr14 | 51563752 | 51563950 | promoter-1 | promoter-1 | -127   | NM_01363 | 18950  | Pnp        | AL024301   |
| chr8  | 3646902  | 3647075  | Intergenic | Intergenic | -8782  | NM_00120 | 57264  | Retn       | ADSF Fizz3 |
| chr11 | 53520602 | 53520850 | promoter-1 | promoter-1 | 95     | NM_00901 | 19360  | Rad50      | Mrell Rad5 |
| chr7  | 1.51E+08 | 1.51E+08 | promoter-1 | promoter-1 | 41     | NM_00876 | 18400  | Slc22a18   | AW260131   |
| chr3  | 1.02E+08 | 1.02E+08 | Intergenic | ORR1E LTF  | -17987 | NM_00103 | 242126 | Slc22a15   | 2610034P2  |
| chr17 | 74268152 | 74268275 | intron (NM | intron (NM | 31323  | NM_01172 | 22436  | Xdh        | XO Xor Xo  |
| chr1  | 84719477 | 84719650 | 3' UTR (NV | 3' UTR (NV | -26767 | NM_15291 | 227325 | Dner       | A930026D:  |
| chr14 | 48013152 | 48013550 | intron (NM | intron (NM | 19816  | NM_00114 | 16854  | Lgals3     | GBP L-34   |

|       |          |          |                       |        |           |        |          |            |
|-------|----------|----------|-----------------------|--------|-----------|--------|----------|------------|
| chr13 | 54605177 | 54605675 | intron (NM CpG        | 260    | NM_17698  | 319719 | Simc1    | 4732471D1  |
| chr19 | 6140527  | 6140775  | intron (NM CpG        | 486    | NM_01972  | 56327  | Arl2     | 2610009M   |
| chr17 | 35258452 | 35258875 | promoter-1promoter-1  | 222    | NM_00112  | 81845  | Gpank1   | Bat-4 Bat4 |
| chr8  | 1.29E+08 | 1.29E+08 | Intergenic Intergenic | -47261 | NM_00115  | 212728 | Gm17296  | Gm179 Ta   |
| chr9  | 1.08E+08 | 1.08E+08 | TTS (NM_0 TTS (NM_0   | 238    | NM_03139  | 83669  | Wdr6     | mWDR6      |
| chr9  | 1.14E+08 | 1.14E+08 | promoter-1promoter-1  | -195   | NR_10810: | 12091  | Glb1     | AW125515   |
| chr10 | 60837727 | 60837825 | intron (NM intron (NM | 8495   | NM_01375  | 27355  | Pald1    | MMPAL Pa   |
| chr19 | 37030902 | 37031125 | exon (NM_ exon (NM_   | 30444  | NM_00108  | 107182 | Btaf1    | AI414500 , |
| chr1  | 42922952 | 42923125 | intron (NM RLTR9A LT  | 14960  | NM_02351  | 69527  | Mrps9    | 2310002AC  |
| chr8  | 89411402 | 89411500 | Intergenic B1_Mur2 :  | -2294  | NM_03056  | 80750  | N4bp1    | AI481586 o |
| chr1  | 1.68E+08 | 1.68E+08 | Intergenic Intergenic | -10041 | NM_00108  | 68481  | Mpzl1    | 1110007A1  |
| chr10 | 69375327 | 69375400 | intron (NM intron (NM | -12917 | NM_17068  | 11735  | Ank3     | 2900054DC  |
| chr9  | 1.08E+08 | 1.08E+08 | promoter-1promoter-1  | -216   | NM_00824  | 15235  | Mst1     | D3F15S2h   |
| chr8  | 13026702 | 13026875 | intron (NM intron (NM | 754    | NM_01017  | 14068  | F7       | AI132620 o |
| chr7  | 71215927 | 71216250 | Intergenic L1_Mur3 L  | -82633 | NM_00103  | 17364  | Trpm1    | 4732499LO  |
| chr2  | 35083027 | 35083200 | Intergenic Intergenic | -26473 | NM_02669  | 68365  | Rab14    | 0610030G2  |
| chr18 | 67930027 | 67930125 | Intergenic Intergenic | -4454  | NM_02811  | 72124  | Seh1l    | 2610007A1  |
| chr13 | 67369827 | 67370050 | promoter-1promoter-1  | 66     | NM_00100  | 238690 | Zfp458   | BC062958   |
| chr1  | 87488852 | 87489075 | intron (NM Lx7 LINE L | 6422   | NM_03019  | 109032 | Sp110    | 5031415CC  |
| chr19 | 34708102 | 34708225 | intron (NM intron (NM | 7070   | NM_05321  | 112419 | 2010002M | AW412491   |
| chr11 | 4342352  | 4342425  | Intergenic MTD LTR    | -1303  | NM_02945  | 75828  | Hormad2  | 4930529M   |
| chr10 | 1.16E+08 | 1.16E+08 | intron (NR_ RLTR11B L | 19141  | NM_00103  | 72068  | Cnot2    | 2600016M   |
| chr1  | 33586577 | 33586925 | intron (NM intron (NM | 139888 | NM_00892  | 19076  | Prim2    | AI323589   |
| chr2  | 1.79E+08 | 1.79E+08 | intron (NML1MB7 LIN   | 144755 | NM_00986  | 12561  | Cdh4     | AW120700   |
| chr14 | 73924777 | 73925000 | exon (NM_ exon (NM_   | 15032  | NM_02611  | 67381  | Med4     | 2410046H1  |
| chr2  | 1.63E+08 | 1.63E+08 | promoter-1promoter-1  | -381   | NM_02649  | 67996  | Srsf6    | 1210001E1  |
| chr16 | 16685502 | 16685675 | Intergenic L1_Mur3 L  | -11516 | NM_14633  | 18316  | Olfr19   | M12 MOR    |
| chr11 | 96835452 | 96835575 | intron (NM intron (NM | 3489   | NM_03022  | 78912  | Sp2      | 49304801 o |
| chr3  | 89223152 | 89223275 | promoter-1promoter-1  | 740    | NM_01136  | 20416  | Shc1     | Shc ShcA   |
| chr1  | 65136777 | 65137325 | Intergenic MER31B L   | -8187  | NM_14476  | 12965  | Crygb    | Cryg-3 DG  |
| chr17 | 80461127 | 80461450 | exon (NM_ exon (NM_   | 320    | NM_14480  | 72692  | Hnrnp1l  | 2510028HC  |
| chr8  | 1.14E+08 | 1.14E+08 | intron (NM CpG        | 272    | NM_01180  | 23837  | Cfdp1    | AA408409   |
| chr2  | 84722652 | 84723000 | intron (NM intron (NM | 4023   | NM_19922  | 269295 | Rtn4rl2  | Ngr2 Ngrh  |
| chr6  | 49164127 | 49164375 | intron (NM CpG        | 702    | NM_02367  | 140488 | Igf2bp3  | 2610101N1  |
| chr4  | 1.5E+08  | 1.5E+08  | promoter-1promoter-1  | 51     | NM_13375  | 74155  | Errfi1   | 1300002F1  |
| chr17 | 32421427 | 32421600 | promoter-1promoter-1  | -435   | NM_02050  | 57261  | Brd4     | Brd5 HUNI  |
| chr16 | 44172602 | 44172700 | promoter-1promoter-1  | -859   | NM_00102  | 207806 | Gm608    | 5530400K2  |
| chr12 | 70329377 | 70329500 | promoter-1promoter-1  | -261   | NM_01113  | 18974  | Pole2    | -          |
| chr13 | 41048577 | 41048875 | intron (NM intron (NM | 35723  | NM_13321  | 14538  | Gcnt2    | 5330430K1  |
| chr9  | 1.1E+08  | 1.1E+08  | TTS (NM_0 TTS (NM_0   | -6725  | NM_00108  | 235626 | Setd2    | 4921524K1  |
| chr11 | 58136502 | 58136675 | promoter-1promoter-1  | 27     | NM_00125  | 319475 | Zfp672   | 4930488PC  |
| chr8  | 26708002 | 26708175 | promoter-1promoter-1  | -129   | NM_17301  | 270035 | Letm2    | 6030453H1  |
| chr1  | 54307777 | 54307850 | intron (NM intron (NM | 286    | NM_03002  | 78016  | Ccdc150  | 4930511H1  |
| chr11 | 96515277 | 96515375 | intron (NM intron (NM | 123543 | NM_02896  | 74479  | Snx11    | 4933439F1  |
| chr3  | 94217027 | 94217450 | promoter-1promoter-1  | -2     | NM_02830  | 72634  | Tdrkh    | 2700091C2  |
| chr7  | 1.21E+08 | 1.21E+08 | intron (NM intron (NM | 96944  | NM_02584  | 66922  | Rras2    | 2610016H2  |
| chr9  | 1.03E+08 | 1.03E+08 | exon (NM_ exon (NM_   | 4416   | NM_00108  | 28135  | Cep63    | 4921501M   |

|       |          |          |            |            |         |           |        |            |            |
|-------|----------|----------|------------|------------|---------|-----------|--------|------------|------------|
| chr15 | 79571877 | 79572125 | intron (NM | intron (NM | 965     | NM_19434  | 223697 | Sun2       | B230369L0  |
| chr8  | 73988377 | 73988550 | promoter-1 | promoter-1 | -362    | NM_05316  | 94065  | Mrpl34     | 0610007O1  |
| chr10 | 79793202 | 79793300 | intron (NM | intron (NM | 361     | NM_13929  | 70335  | Reep6      | 0610011M   |
| chr15 | 12034802 | 12034875 | Intergenic | Intergenic | -12768  | NM_01176  | 22763  | Zfr        | C920030HC  |
| chr4  | 1.33E+08 | 1.33E+08 | promoter-1 | promoter-1 | -83     | NR_110978 | 52174  | Tmem222    | 5730406H1  |
| chr3  | 1.27E+08 | 1.27E+08 | intron (NM | intron (NM | 1057    | NM_14513  | 211550 | Tifa       | T2bp       |
| chr13 | 41169252 | 41169600 | intron (NM | intron (NM | -3592   | NM_00854  | 17152  | Mak        | A9300100C  |
| chr17 | 49568402 | 49568700 | intron (NM | intron (NM | 862     | NM_02004  | 56738  | Mocs1      | 3110045D1  |
| chr12 | 80294252 | 80294525 | Intergenic | MURVY-int  | -1582   | NM_02155  | 17252  | Rdh11      | 2610319N2  |
| chr11 | 98769127 | 98769275 | promoter-1 | promoter-1 | -2      | NM_00102  | 23834  | Cdc6       | CDC18L     |
| chr18 | 77304252 | 77304550 | promoter-1 | promoter-1 | -18     | NM_00116  | 17344  | Pias2      | 6330408K1  |
| chr11 | 87532927 | 87533300 | intron (NM | B1_Mur1 S  | -17954  | NM_00929  | 20922  | Supt4a     | AL022777   |
| chr8  | 88468652 | 88469050 | intron (NM | intron (NM | 103950  | NM_19944  | 102093 | Phkb       | AI463271   |
| chr8  | 88131652 | 88131950 | Intergenic | RMER2 LTI  | -52631  | NM_01979  | 56445  | Dnaja2     | 1500017M   |
| chr1  | 1.07E+08 | 1.07E+08 | Intergenic | MT2A LTR   | 185811  | NM_17877  | 320311 | Rnf152     | A930029BC  |
| chr7  | 38985227 | 38985500 | Intergenic | Intergenic | 16557   | NM_02816  | 72244  | 1600014C1  | AI428873   |
| chr5  | 66466202 | 66466725 | intron (NM | B3 SINE B  | 22955   | NM_13906  | 245945 | Rbm47      | 9530077J1  |
| chr8  | 36439052 | 36439125 | intron (NM | intron (NM | 293     | NM_17774  | 244416 | Ppp1r3b    | 6430576E2  |
| chr4  | 1.23E+08 | 1.23E+08 | promoter-1 | promoter-1 | -7      | NM_02966  | 76574  | Mfsd2a     | 1700018O1  |
| chr2  | 1.68E+08 | 1.68E+08 | Intergenic | Intergenic | -98539  | NM_01120  | 19246  | Ptpn1      | PTP-1B PTI |
| chr2  | 1.14E+08 | 1.14E+08 | promoter-1 | promoter-1 | -45     | NM_17546  | 228491 | Zfp770     | 6430601A2  |
| chr6  | 85865452 | 85865725 | promoter-1 | promoter-1 | 83      | NM_02316  | 66116  | Cml1       | 111000211  |
| chr16 | 75855602 | 75856125 | Intergenic | Intergenic | 53648   | NM_02338  | 67742  | Samsn1     | 4930571B1  |
| chr15 | 83425177 | 83425375 | intron (NM | CpG        | 311     | NM_18301  | 223723 | Ttll12     | BC055368   |
| chr9  | 15162352 | 15162500 | promoter-1 | promoter-1 | -194    | NM_17697  | 319675 | 5830418KC  | 5832426L2  |
| chr13 | 93961952 | 93962175 | 5' UTR (NM | 5' UTR (NM | 175     | NM_13390  | 100715 | Papd4      | 8030446C2  |
| chr5  | 31350677 | 31350875 | promoter-1 | promoter-1 | 159     | NM_00117  | 330064 | Slc5a6     | E430023I2C |
| chr6  | 6528777  | 6528850  | promoter-1 | promoter-1 | -155    | NM_00916  | 20422  | Shfm1      | DSS1 Shfdq |
| chr5  | 68215002 | 68215400 | intron (NM | intron (NM | 23469   | NM_00128  | 11980  | Atp8a1     | AI481521 , |
| chr3  | 31324302 | 31324425 | Intergenic | Intergenic | -115122 | NM_17286  | 241919 | Slc7a14    | A930013N0  |
| chr5  | 92706802 | 92707000 | intron (NM | CpG        | 306     | NM_00116  | 67111  | Naaa       | 2210023K2  |
| chr4  | 1.41E+08 | 1.41E+08 | promoter-1 | promoter-1 | 50      | NM_00954  | 22642  | Zbtb17     | AA589413   |
| chr1  | 1.74E+08 | 1.74E+08 | Intergenic | Intergenic | -7335   | NM_02797  | 71870  | Ccdc19     | 1700028DC  |
| chr3  | 1.43E+08 | 1.43E+08 | intron (NM | intron (NM | 1080    | NM_17865  | 109333 | Pkn2       | 6030436C2  |
| chr2  | 1.2E+08  | 1.2E+08  | intron (NM | intron (NM | -12878  | NM_00117  | 12335  | Capn3      | AI323605 C |
| chr7  | 1.44E+08 | 1.44E+08 | promoter-1 | promoter-1 | -368    | NM_00859  | 17314  | Mgmt       | AGT AI267  |
| chr6  | 1.34E+08 | 1.34E+08 | 5' UTR (NM | 5' UTR (NM | 326     | NM_00796  | 14011  | Etv6       | AW123102   |
| chr2  | 37298102 | 37298175 | promoter-1 | promoter-1 | 503     | NM_19902  | 320633 | Zbtb26     | A630026F2  |
| chr12 | 79963127 | 79963425 | promoter-1 | promoter-1 | 217     | NM_02611  | 13665  | Eif2s1     | 0910001O2  |
| chr2  | 80457152 | 80457225 | promoter-1 | promoter-1 | -183    | NM_02443  | 68082  | Dusp19     | 5930436K2  |
| chr19 | 8963327  | 8963450  | promoter-1 | promoter-1 | 15      | NR_104416 | 66276  | 1810009A1- |            |
| chr7  | 1.34E+08 | 1.34E+08 | promoter-1 | promoter-1 | -423    | NM_14620  | 233890 | Zfp768     | BC026432   |
| chr7  | 87679502 | 87679675 | 5' UTR (NM | 5' UTR (NM | 296     | NM_00755  | 12144  | Blm        | -          |
| chr11 | 22756727 | 22756875 | intron (NM | intron (NM | 2934    | NM_01688  | 53625  | B3gnt2     | AA408337   |
| chr3  | 1.42E+08 | 1.42E+08 | intron (NM | intron (NM | 226     | NM_14554  | 229900 | Gbp7       | 9830147J2  |
| chr10 | 29909902 | 29909975 | Intergenic | Intergenic | 10408   | NM_00110  | 66311  | Cenpw      | 2610036L1  |
| chr1  | 1.73E+08 | 1.73E+08 | Intergenic | Intergenic | -1124   | NM_01018  | 14130  | Fcgr2b     | AI528646 C |

|       |          |          |            |            |         |          |        |           |            |
|-------|----------|----------|------------|------------|---------|----------|--------|-----------|------------|
| chr16 | 78579202 | 78579525 | Intergenic | L1M5 LINE  | -2430   | NM_02596 | 67102  | D16Ertd47 | 1700010110 |
| chr15 | 80873877 | 80874075 | intron (NM | intron (NM | 61501   | NM_15304 | 223701 | Mkl1      | AMKL Bsa   |
| chr19 | 44371927 | 44372150 | intron (NM | intron (NM | 3872    | NM_00912 | 20250  | Scd2      | Scd-2 swty |
| chr12 | 70464602 | 70464875 | Intergenic | Intergenic | -6575   | NM_02544 | 66244  | Nemf      | 150001111: |
| chr3  | 1.38E+08 | 1.38E+08 | Intergenic | RSINE1 SIN | -1100   | NM_01675 | 51788  | H2afz     | H2A.Z H2a  |
| chr9  | 1.16E+08 | 1.16E+08 | intron (NM | intron (NM | 83643   | NM_02957 | 21813  | Tgfbr2    | 1110020H1  |
| chr3  | 50247402 | 50247700 | promoter-1 | promoter-1 | -16     | NM_01199 | 26570  | Slc7a11   | 9930009M   |
| chr16 | 20359827 | 20360000 | intron (NM | intron (NM | -34436  | NM_18315 | 224044 | Cyp2ab1   | EG224044   |
| chr1  | 1.79E+08 | 1.79E+08 | promoter-1 | promoter-1 | -153    | NM_02975 | 76816  | Sdccag8   | 2700048Gz  |
| chr1  | 59970802 | 59971100 | intron (NM | intron (NM | 1101    | NM_00103 | 72750  | Fam117b   | 2810425F2  |
| chr8  | 1.09E+08 | 1.09E+08 | intron (NM | CpG        | 963     | NM_00922 | 20650  | Sntb2     | Snt2       |
| chr7  | 74873177 | 74873275 | Intergenic | ORR1E LTF  | 31402   | NM_18331 | 233335 | Synm      | 4930412K2  |
| chr7  | 95459252 | 95459475 | TTS (NM_0  | TTS (NM_0  | 32760   | NM_00998 | 13032  | Ctsc      | AI047818 I |
| chr19 | 55213727 | 55214000 | Intergenic | Intergenic | -39926  | NM_00814 | 14732  | Gpam      | GPAT GPA   |
| chr11 | 88959877 | 88959950 | Intergenic | Intergenic | 24758   | NM_00103 | 217071 | Gm525     | -          |
| chr13 | 49292177 | 49292325 | TTS (NM_0  | TTS (NM_0  | 9335    | NM_01361 | 18081  | Ninj1     | AU024536   |
| chr8  | 60723752 | 60723825 | intron (NM | intron (NM | 455805  | NM_00117 | 1E+08  | Gm15881   | OTTMUSG(   |
| chr13 | 23802227 | 23802550 | intron (NM | intron (NM | 292     | NM_01042 | 15216  | Hfe       | MR2        |
| chr1  | 1.38E+08 | 1.38E+08 | promoter-1 | promoter-1 | -332    | NM_00108 | 67886  | Camsap2   | 1600013L1  |
| chr19 | 53969302 | 53969600 | intron (NM | intron (NM | 2730    | NM_01105 | 18569  | Pdcd4     | D19Ucla1   |
| chr11 | 97691502 | 97691700 | intron (NM | intron (NM | -10493  | NM_00108 | 68127  | B230217C1 | AI840637   |
| chr10 | 1.11E+08 | 1.11E+08 | Intergenic | Intergenic | 33521   | NM_00934 | 21664  | Phlda1    | DT1P1B11   |
| chr9  | 26917327 | 26917500 | intron (NM | intron (NM | 45593   | NM_02327 | 83964  | Jam3      | 1110002Nz  |
| chr3  | 50652827 | 50652950 | Intergenic | Intergenic | -375481 | NM_00983 | 12457  | Ccrn4l    | AU043840   |
| chr1  | 72301327 | 72301475 | Intergenic | CpG        | 29487   | NM_02352 | 111175 | Pecr      | 2400003B1  |
| chr10 | 5959127  | 5959250  | intron (NM | CpG        | 755     | NM_00103 | 381990 | Zbtb2     | Gm1103     |
| chr4  | 1.34E+08 | 1.34E+08 | Intergenic | Intergenic | -2939   | NM_02366 | 27981  | Rsrp1     | 2700043I2: |
| chr18 | 65048002 | 65048125 | intron (NM | CpG        | 653     | NM_00111 | 83814  | Nedd4l    | 1300012CC  |
| chr16 | 17147077 | 17147350 | exon (NM_  | exon (NM_  | 153     | NM_02694 | 69101  | Ydjc      | 1810015A1  |
| chr4  | 13054227 | 13054400 | Intergenic | Intergenic | 220329  | NM_00117 | 208820 | Triqk     | C130086A1  |
| chr1  | 1.73E+08 | 1.73E+08 | intron (NM | intron (NM | 79963   | NM_17706 | 320078 | Olfml2b   | 1110018N(  |
| chr9  | 64642252 | 64642325 | Intergenic | Intergenic | -16530  | NM_00116 | 102442 | Dennd4a   | AI115600 , |
| chr5  | 1.48E+08 | 1.48E+08 | Intergenic | Intergenic | 91044   | NM_01166 | 22217  | Usp12     | Ubh1       |
| chr11 | 87977952 | 87978100 | intron (NM | intron (NM | -5041   | NM_00117 | 103841 | Cuedc1    | AI841487 I |
| chr7  | 16899027 | 16899200 | exon (NM_  | exon (NM_  | 4181    | NM_13323 | 170770 | Bbc3      | PUMA PUF   |
| chr11 | 95895602 | 95896250 | promoter-1 | promoter-1 | -305    | NM_03356 | 27681  | Snf8      | D11Moh34   |
| chr13 | 43620252 | 43620500 | Intergenic | Intergenic | 35184   | NM_00108 | 76137  | Mcur1     | 6230416AC  |
| chr5  | 1.23E+08 | 1.23E+08 | intron (NM | intron (NM | 2789    | NM_00128 | 330188 | Ccdc63    | 4921511C1  |
| chr9  | 1.04E+08 | 1.04E+08 | intron (NM | B1F SINE , | 488     | NM_02569 | 66663  | Uba5      | 5730525G1  |
| chr5  | 76572702 | 76572850 | intron (NM | B3 SINE B. | 3478    | NM_02061 | 57357  | Srd5a3    | 1110025P1  |
| chr5  | 1.36E+08 | 1.36E+08 | exon (NM_  | exon (NM_  | 165     | NM_02145 | 58805  | Mlxipl    | ChREBP W   |
| chr3  | 1.33E+08 | 1.33E+08 | promoter-1 | promoter-1 | 503     | NM_02623 | 67553  | Gstcd     | 4933434L1  |
| chr8  | 1.13E+08 | 1.13E+08 | intron (NM | MER3 DNA   | 1263    | NM_14621 | 234729 | Vac14     | AA959718   |
| chr16 | 45231602 | 45231700 | intron (NM | intron (NM | 7201    | NM_17758 | 208154 | Btla      | A630002H:  |
| chr2  | 1.57E+08 | 1.57E+08 | promoter-1 | promoter-1 | 100     | NM_00104 | 228836 | Dlgap4    | AI225853 I |
| chr13 | 21291777 | 21291975 | Intergenic | Intergenic | 20076   | NM_00905 | 19720  | Trim27    | AW538890   |
| chr3  | 51548802 | 51549350 | intron (NM | intron (NM | 83961   | NM_17499 | 211666 | Mgst2     | GST2 MGS   |

|       |          |          |             |             |         |          |        |          |            |
|-------|----------|----------|-------------|-------------|---------|----------|--------|----------|------------|
| chr13 | 46428727 | 46428975 | Intergenic  | Intergenic  | 59761   | NM_00100 | 380842 | Stmnd1   | Gm1574     |
| chr10 | 57909627 | 57909950 | exon (NM_   | exon (NM_   | 188     | NM_01124 | 19386  | Ranbp2   | A430087BC  |
| chr3  | 53667377 | 53667700 | exon (NM_   | exon (NM_   | 191     | NM_02643 | 67890  | Ufm1     | 1810045K1  |
| chr2  | 18860577 | 18860875 | intron (NM  | intron (NM  | 59022   | NM_00884 | 18718  | Pip4k2a  | AW742916   |
| chr17 | 13200677 | 13200975 | 5' UTR (NV  | 5' UTR (NV  | 121     | NM_01367 | 20656  | Sod2     | MnSOD Sc   |
| chr16 | 57167102 | 57167275 | intron (NM  | CpG         | 257     | NM_02317 | 52633  | Nit2     | 1190017B1  |
| chr8  | 87417352 | 87417425 | intron (NM  | intron (NM  | 432     | NM_00104 | 270076 | Gcdh     | 9030411L1  |
| chr7  | 1.19E+08 | 1.19E+08 | intron (NM  | intron (NM  | 171878  | NM_17373 | 233733 | Galnt18  | 2900011G2  |
| chrX  | 75989702 | 75989775 | Intergenic  | RMER16-in   | 6636    | NM_00116 | 70864  | Fam47c   | 4921509A1  |
| chr9  | 37020852 | 37021225 | intron (NML | L1M5 LINE   | 5120    | NM_02546 | 66279  | Tmem218  | 1810021J1  |
| chr15 | 75911077 | 75911200 | intron (NM  | CpG         | 162     | NM_00116 | 67959  | Puf60    | 24101041!  |
| chr3  | 65331827 | 65331975 | promoter-1  | promoter-1  | -468    | NM_17889 | 99929  | Tiparp   | ARTD14 A'  |
| chr2  | 1.57E+08 | 1.57E+08 | intron (NM  | CT-rich Lov | -21118  | NM_01885 | 56045  | Samhd1   | E330031J0' |
| chr11 | 76758877 | 76759075 | promoter-1  | promoter-1  | -182    | NM_17864 | 104184 | Blmh     | AI035728   |
| chr19 | 4755977  | 4756125  | promoter-1  | promoter-1  | -474    | NM_02571 | 66704  | Rbm4b    | 492150612: |
| chr12 | 1.04E+08 | 1.04E+08 | intron (NM  | intron (NM  | 72575   | NM_00116 | 217835 | Rin3     | 6430500KC  |
| chr8  | 96738552 | 96738875 | intron (NM  | CpG         | 212     | NM_17241 | 71805  | Nup93    | 2410008GC  |
| chr12 | 1.14E+08 | 1.14E+08 | promoter-1  | promoter-1  | 65      | NM_14545 | 217887 | BC022687 | AW050009   |
| chr7  | 1.01E+08 | 1.01E+08 | Intergenic  | Intergenic  | 536974  | NM_02142 | 58238  | Fam181b  | A830059I2  |
| chr6  | 92051127 | 92051275 | intron (NM  | intron (NM  | 9789    | NM_01163 | 22026  | Nr2c2    | TAK1 Tr4   |
| chr5  | 1.45E+08 | 1.45E+08 | intron (NM  | intron (NM  | 769     | NM_01877 | 55950  | Bri3     | I3         |
| chr2  | 92274652 | 92274775 | promoter-1  | promoter-1  | -487    | NM_00996 | 12953  | Cry2     | AV006279   |
| chr3  | 1.08E+08 | 1.08E+08 | exon (NM_   | exon (NM_   | 182     | NM_01030 | 14679  | Gnai3    | AI158965 , |
| chr12 | 86337677 | 86337775 | exon (NM_   | exon (NM_   | 455     | NM_17836 | 56531  | Ylpm1    | A930013E1  |
| chr9  | 69560852 | 69561250 | Intergenic  | Intergenic  | 47696   | NM_02237 | 64290  | Foxb1    | C43 Fkh5   |
| chr4  | 9037477  | 9037875  | Intergenic  | L1MB2 LIN   | -158788 | NM_02894 | 74438  | Clvs1    | 4933402J2. |
| chr2  | 61133752 | 61134050 | Intergenic  | Intergenic  | -282742 | NM_01152 | 21353  | Tank     | C86182 E4  |
| chr11 | 66866077 | 66866225 | promoter-1  | promoter-1  | -21     | NM_00104 | 52892  | Sco1     | 2610001CC  |
| chr1  | 97425377 | 97425550 | Intergenic  | Intergenic  | 138708  | NM_00918 | 20452  | St8sia4  | PST PST-1  |
| chr9  | 91482202 | 91482400 | Intergenic  | Intergenic  | 218491  | NM_00957 | 22774  | Zic4     | -          |
| chr3  | 88913852 | 88914100 | Intergenic  | RLTR24 LT   | -8087   | NM_00125 | 110196 | Fdps     | 603049211' |
| chr14 | 56353752 | 56354000 | Intergenic  | MIRb SINE   | 10645   | NM_02681 | 52585  | Dhrs1    | 1110029GC  |
| chr2  | 1.48E+08 | 1.48E+08 | Intergenic  | RCHARR1     | -48642  | NM_01074 | 17064  | Cd93     | 6030404GC  |
| chr12 | 86830252 | 86830475 | Intergenic  | Intergenic  | 15512   | NM_01023 | 14281  | Fos      | D12Rfj1 c- |
| chr5  | 3355702  | 3355900  | intron (NM  | intron (NM  | 11489   | NM_00987 | 12571  | Cdk6     | 5830411I2( |
| chr5  | 1.05E+08 | 1.05E+08 | 5' UTR (NV  | 5' UTR (NV  | 175     | NM_00886 | 18764  | Pkd2     | C030034P1  |
| chr13 | 20886052 | 20886250 | 5' UTR (NV  | 5' UTR (NV  | 169     | NM_01205 | 27052  | Aoah     | 4930433E1  |
| chr2  | 64939427 | 64939950 | intron (NM  | intron (NM  | -78865  | NM_01671 | 50915  | Grb14    | AI505286   |
| chr3  | 94641177 | 94641600 | promoter-1  | promoter-1  | -101    | NM_00116 | 229584 | Pogz     | 9530006BC  |
| chrX  | 1.1E+08  | 1.1E+08  | intron (NM  | Lx6 LINE L  | 42597   | NM_18157 | 69693  | Pof1b    | 2310066B1  |
| chr18 | 5334402  | 5334675  | promoter-1  | promoter-1  | -101    | NM_17872 | 240186 | Zfp438   | 9430031GC  |
| chr9  | 95998477 | 95998575 | Intergenic  | RMER16-in   | -21322  | NM_17735 | 235533 | Gk5      | AV095337   |
| chrX  | 83042802 | 83043125 | Intergenic  | Intergenic  | -20805  | NM_00129 | 14933  | Gyk      | D930012N:  |
| chr7  | 28834877 | 28835025 | intron (NM  | intron (NM  | 160     | NM_01187 | 23996  | Psmc4    | CIP21 MIP  |
| chr15 | 82183927 | 82184050 | intron (NM  | intron (NM  | 733     | NM_02598 | 67130  | Ndufa6   | 14kDa 270  |
| chr18 | 47457602 | 47457775 | intron (NM  | intron (NM  | 70834   | NM_01874 | 20358  | Sema6a   | 9330158E0  |
| chr11 | 69499052 | 69499250 | promoter-1  | promoter-1  | -95     | NM_02351 | 69583  | Tnfsf13  | 2310026NC  |



|       |          |          |                       |            |         |          |        |          |            |
|-------|----------|----------|-----------------------|------------|---------|----------|--------|----------|------------|
| chr10 | 44421927 | 44422200 | Intergenic            | Intergenic | -243570 | NM_00754 | 12142  | Prdm1    | Blimp-1 Bl |
| chr19 | 56609552 | 56609900 | intron (NML1MB7 LIN   |            | 12986   | NM_01883 | 55947  | Dclre1a  | 2810043H1  |
| chr18 | 31769052 | 31769450 | exon (NM_exon (NM_    |            | 305     | NM_02616 | 67453  | Slc25a46 | 1200007BC  |
| chr18 | 55233202 | 55233350 | Intergenic            | Intergenic | -83442  | NM_17575 | 269023 | Zfp608   | 4932417D1  |
| chr4  | 98860727 | 98861000 | promoter-1            | promoter-1 | 25      | NM_00114 | 242557 | Atg4c    | Apg4-C Ap  |
| chr11 | 1.21E+08 | 1.21E+08 | intron (NM CpG        |            | 132     | NM_00103 | 80879  | Slc16a3  | Mct3 Mct4  |
| chr4  | 1.47E+08 | 1.47E+08 | promoter-1            | promoter-1 | -229    | NM_19861 | 242747 | Zfp933   | 2810408P1  |
| chr3  | 33722252 | 33722350 | intron (NM MIRb SINE  |            | 20931   | NM_02622 | 51938  | Ccdc39   | 4921507O1  |
| chr2  | 27370252 | 27370600 | promoter-1            | promoter-1 | -241    | NM_08084 | 140858 | Wdr5     | 2410008OC  |
| chr17 | 25970327 | 25970425 | promoter-1            | promoter-1 | -70     | NM_01971 | 56424  | Stub1    | 0610033N2  |
| chr4  | 1.02E+08 | 1.02E+08 | Intergenic            | Intergenic | -77927  | NM_00128 | 73094  | Sgip1    | 3110007PC  |
| chr1  | 37917402 | 37917500 | intron (NM ORR1B2 L1  |            | 4476    | NM_20722 | 211484 | Tsga10   | 4933432N2  |
| chr7  | 1.26E+08 | 1.26E+08 | intron (NM intron (NM |            | 2564    | NM_01958 | 56209  | Gde1     | 1200003M   |
| chr7  | 52253277 | 52253525 | promoter-1            | promoter-1 | 383     | NM_01684 | 54131  | Irf3     | C920001KC  |
| chr19 | 40969402 | 40969475 | TTS (NR_1C TTS (NR_1C |            | 243     | NM_02831 | 72672  | Zfp518a  | 2810401C2  |
| chr6  | 90964377 | 90964550 | exon (NM_exon (NM_    |            | 102357  | NM_01881 | 54563  | Nup210   | 9830001L1  |
| chr6  | 23161752 | 23161850 | Intergenic            | Intergenic | 36463   | NM_02846 | 73191  | Fezf1    | 3110069A1  |
| chr19 | 29085927 | 29086125 | intron (NM intron (NM |            | 21042   | NM_02595 | 67072  | Cdc37l1  | 2700033A1  |
| chr2  | 1.58E+08 | 1.58E+08 | intron (NM intron (NM |            | 424     | NM_17785 | 329547 | Bpi      | 9230105K1  |
| chr8  | 1.23E+08 | 1.23E+08 | intron (NML2b LINE L  |            | 53218   | NM_03020 | 78892  | Crispld2 | 1810049K2  |
| chr15 | 93106102 | 93106350 | promoter-1            | promoter-1 | -711    | NM_00103 | 223827 | Gxytl1   | Glt8d3 Grr |
| chr17 | 12962652 | 12962775 | promoter-1            | promoter-1 | -141    | NM_01051 | 16004  | Igf2r    | AI661837 I |
| chr12 | 1.01E+08 | 1.01E+08 | Intergenic            | Intergenic | -8963   | NM_18315 | 217827 | Nrde2    | 6720454PC  |
| chr1  | 37618777 | 37618975 | Intergenic            | Intergenic | -21015  | NM_17387 | 269181 | Mgat4a   | 953001810  |
| chr13 | 47109777 | 47110100 | exon (NM_exon (NM_    |            | 281     | NM_17534 | 105193 | Nhlrc1   | AI505271 I |
| chr1  | 1.69E+08 | 1.69E+08 | promoter-1            | promoter-1 | -330    | NM_03072 | 80914  | Uck2     | AA407809   |
| chr9  | 71981052 | 71981125 | Intergenic            | CpG        | -21462  | NM_00125 | 21406  | Tcf12    | A130037EC  |
| chr6  | 86354952 | 86355100 | intron (NM intron (NM |            | 813     | NM_00116 | 21841  | Tia1     | 2310050NC  |
| chr3  | 35831877 | 35832350 | promoter-1            | promoter-1 | -225    | NM_00120 | 114893 | Dcun1d1  | Rp42 SCCF  |
| chr6  | 57484552 | 57484700 | intron (NM intron (NM |            | 794     | NM_17552 | 243382 | Ppm1k    | 2900063A1  |
| chr1  | 1.2E+08  | 1.2E+08  | Intergenic            | Intergenic | -8672   | NM_00129 | 76707  | Clasp1   | 1700030C2  |
| chr11 | 33062502 | 33062600 | intron (NM CpG        |            | 655     | NM_00125 | 18148  | Npm1     | B23 NO38   |
| chr8  | 90886277 | 90886575 | promoter-1            | promoter-1 | -336    | NM_01204 | 26992  | Brd7     | BP75 CELT  |
| chr8  | 85297877 | 85297975 | promoter-1            | promoter-1 | 99      | NM_14560 | 30932  | Zfp330   | BC008086   |
| chr18 | 34919827 | 34919925 | intron (NM intron (NM |            | 1316    | NM_17510 | 66306  | Fam53c   | 2810012GC  |
| chr15 | 99217527 | 99217625 | Intergenic            | ORR1E-int  | -5802   | NM_02666 | 110213 | Tmbim6   | 5031406PC  |
| chr14 | 18712252 | 18712350 | intron (NM intron (NM |            | -101857 | NM_00938 | 21834  | Thrb     | Nr1a2 T3R  |
| chr1  | 1.72E+08 | 1.72E+08 | Intergenic            | RMER17C    | -22179  | NM_01200 | 26904  | Sh2d1b1  | EAT-2 EAT  |
| chr15 | 78707702 | 78708175 | 5' UTR (NM 5' UTR (NV |            | 318     | NM_14592 | 106039 | Gga1     | 4930406E1  |
| chr2  | 68220852 | 68221000 | intron (NM intron (NM |            | 89112   | NM_01686 | 53416  | Stk39    | AW227544   |
| chr4  | 1.05E+08 | 1.05E+08 | Intergenic            | Intergenic | 548936  | NM_08055 | 67916  | Ppap2b   | 1110003O2  |
| chr2  | 1.66E+08 | 1.66E+08 | Intergenic            | Intergenic | -15925  | NM_00125 | 228880 | Zmynd8   | 1110013E2  |
| chr1  | 1.57E+08 | 1.57E+08 | intron (NM intron (NM |            | 32061   | NM_01127 | 19775  | Xpr1     | Rmc-1 Rm   |
| chr3  | 15332102 | 15332500 | promoter-1            | promoter-1 | 1       | NM_00107 | 751864 | Gm9733   | -          |
| chr19 | 44220402 | 44220775 | intron (NM intron (NM |            | 348     | NM_02860 | 73689  | Bloc1s2  | 2410089B1  |
| chr3  | 95181177 | 95181300 | Intergenic            | RMER16-in  | -20114  | NM_00116 | 84505  | Setdb1   | AU022152   |
| chr18 | 67438477 | 67438550 | Intergenic            | Intergenic | -10364  | NM_05326 | 114663 | Impa2    | 2210415D2  |

|       |          |          |             |            |         |           |        |            |            |
|-------|----------|----------|-------------|------------|---------|-----------|--------|------------|------------|
| chr7  | 16632552 | 16632650 | Intergenic  | Intergenic | -24690  | NM_00109  | 666528 | Zfp541     | EG666528   |
| chr8  | 48799102 | 48799175 | 5' UTR (NM  | 5' UTR (NM | 147     | NM_17240  | 70925  | Cdkn2aip   | 49215111   |
| chr16 | 20717402 | 20717575 | promoter-1  | promoter-1 | -411    | NM_14563  | 245841 | Polr2h     | -          |
| chr10 | 82447802 | 82447900 | promoter-1  | promoter-1 | -391    | NM_02143  | 58250  | Chst11     | 1110020PC  |
| chr15 | 31286752 | 31286975 | intron (NM  | intron (NM | 10651   | NM_00116  | 67434  | Ankrd33b   | 0610012AC  |
| chr15 | 76437577 | 76437675 | intron (NM  | intron (NM | 395     | NM_05319  | 94230  | Cpsf1      | -          |
| chr3  | 1.16E+08 | 1.16E+08 | promoter-1  | promoter-1 | 200     | NM_02719  | 69740  | Dph5       | 2410012M   |
| chr2  | 1.28E+08 | 1.28E+08 | Intergenic  | Intergenic | 121740  | NM_00128  | 12125  | Bcl2l11    | 1500006F2  |
| chr5  | 65492977 | 65493100 | Intergenic  | Intergenic | -29432  | NM_17517  | 71778  | Klhl5      | 1300013C1  |
| chr5  | 1.19E+08 | 1.19E+08 | intron (NM  | intron (NM | 14977   | NM_00108  | 76792  | 2410131K1- |            |
| chr1  | 1.73E+08 | 1.73E+08 | intron (NM  | ID_B1 SIN  | 296     | NM_01018  | 14131  | Fcgr3      | CD16       |
| chr8  | 1.17E+08 | 1.17E+08 | intron (NM  | intron (NM | 642     | NM_00100  | 403395 | Clec3a     | 1110019O1  |
| chr5  | 5420077  | 5420250  | Intergenic  | Intergenic | -39912  | NM_01107  | 18647  | Cdk14      | Pftk1 mKI/ |
| chr9  | 72878302 | 72878550 | intron (NM  | ID_B1 SIN  | 9080    | NM_01888  | 55981  | Pigb       | Pig-b      |
| chr4  | 71710652 | 71710750 | Intergenic  | Intergenic | 151226  | NM_01159  | 21885  | Tle1       | C230057CC  |
| chr7  | 1.47E+08 | 1.47E+08 | Intergenic  | Intergenic | -6005   | NR_027857 | 14912  | Nkx6-2     | Gtx Nkx6.2 |
| chr6  | 30459977 | 30460100 | promoter-1  | promoter-1 | 189     | NM_02707  | 75647  | Ssmem1     | 1700016KC  |
| chr1  | 88600127 | 88600850 | intron (NM  | CpG        | 109     | NM_00117  | 208718 | Dis3l2     | 4930429A2  |
| chr19 | 37624927 | 37625075 | promoter-1  | promoter-1 | 93      | NM_17535  | 107371 | Exoc6      | 4833405E0  |
| chr17 | 64958427 | 64958575 | intron (NM  | intron (NM | 7512    | NM_00854  | 17158  | Man2a1     | Mana-2 M   |
| chr9  | 16732427 | 16732800 | Intergenic  | Intergenic | -549938 | NM_00108  | 270120 | Fat3       | 9430076AC  |
| chr9  | 86916752 | 86917075 | promoter-1  | promoter-1 | 49      | NM_02419  | 266690 | Cyb5r4     | 2810034J1  |
| chr6  | 1.19E+08 | 1.19E+08 | intron (NM  | intron (NM | 21388   | NM_19798  | 68465  | Adipor2    | 111000111  |
| chr12 | 60167927 | 60168125 | exon (NM_   | exon (NM_  | 120     | NM_00889  | 18949  | Pnn        | AU045199   |
| chr11 | 29593502 | 29593725 | promoter-1  | promoter-1 | -161    | NM_19405  | 68585  | Rtn4       | 1110020G1  |
| chr5  | 92471852 | 92471925 | promoter-1  | promoter-1 | -166    | NM_00127  | 53886  | Cdkl2      | 5330436L2  |
| chr12 | 1.04E+08 | 1.04E+08 | Intergenic  | MER58A D   | 11697   | NM_00103  | 75483  | Cox8c      | 1700007F2  |
| chr5  | 3905327  | 3905475  | Intergenic  | Intergenic | -11468  | NM_17213  | 545725 | Mterf1a    | 4931431L1  |
| chr18 | 24070577 | 24070775 | Intergenic  | Intergenic | -42513  | NM_02700  | 69256  | Zfp397     | 2810411K1  |
| chr5  | 34125227 | 34125300 | promoter-1  | promoter-1 | 90      | NM_01969  | 56384  | Letm1      | -          |
| chr3  | 79372102 | 79372350 | promoter-1  | promoter-1 | -625    | NM_00116  | 329679 | Fnip2      | D630023B1  |
| chr7  | 73985177 | 73985425 | exon (NM_   | exon (NM_  | 680     | NM_00103  | 233332 | Adamts17   | AU023434   |
| chr7  | 35019877 | 35019950 | Intergenic  | URR1B DN   | -4558   | NM_00815  | 14751  | Gpi1       | Amf Gpi G  |
| chr5  | 1.31E+08 | 1.31E+08 | 5' UTR (NM  | 5' UTR (NM | 248     | NM_00113  | 22021  | Tpst1      | R75054 Ta  |
| chr5  | 1.24E+08 | 1.24E+08 | 5' UTR (NM  | 5' UTR (NM | 181     | NM_02985  | 77045  | Bcl7a      | 4432415NC  |
| chr4  | 1.32E+08 | 1.32E+08 | promoter-1  | promoter-1 | -240    | NM_13388  | 100226 | Stx12      | AI850350 , |
| chr1  | 1.81E+08 | 1.81E+08 | intron (NM  | intron (NM | 112057  | NM_00116  | 269152 | Kif26b     | 4832420M   |
| chr4  | 1.49E+08 | 1.49E+08 | Intergenic  | LTR79 LTR  | -7022   | NM_00108  | 110208 | Pgd        | 0610042AC  |
| chr4  | 1.33E+08 | 1.33E+08 | Intergenic  | Intergenic | -3587   | NM_00108  | 93760  | Arid1a     | 1110030E0  |
| chr7  | 1.09E+08 | 1.09E+08 | promoter-1  | promoter-1 | -431    | NM_01956  | 56212  | Rhog       | 2810426GC  |
| chr13 | 42149627 | 42149900 | intron (NM  | intron (NM | 2373    | NM_00777  | 110521 | Hivep1     | Cryabp1    |
| chr11 | 76272402 | 76272550 | intron (NM  | intron (NM | 9491    | NM_00129  | 109934 | Abr        | -          |
| chr8  | 1.11E+08 | 1.11E+08 | Intergenic  | Intergenic | -51743  | NM_00749  | 11906  | Zfhx3      | A230102L0  |
| chr8  | 1.08E+08 | 1.08E+08 | promoter-1  | promoter-1 | 205     | NM_19829  | 102124 | Enkd1      | AI606951   |
| chr14 | 31271152 | 31271250 | intron (NML | 2a LINE L  | -21550  | NM_13376  | 75901  | Dcp1a      | 1110066A2  |
| chr3  | 1.3E+08  | 1.3E+08  | 5' UTR (NM  | 5' UTR (NM | 171     | NM_00119  | 619547 | Rpl34-ps1  | EG619547   |
| chr9  | 99469477 | 99469600 | promoter-1  | promoter-1 | -220    | NM_02876  | 74125  | Armc8      | 1200015K2  |

|       |          |          |            |            |         |          |        |            |            |
|-------|----------|----------|------------|------------|---------|----------|--------|------------|------------|
| chr11 | 1.07E+08 | 1.07E+08 | intron (NM | intron (NM | 1871    | NM_14582 | 71795  | Pitpnc1    | 1110020BC  |
| chr14 | 35487152 | 35487375 | 5' UTR (NV | 5' UTR (NV | 149     | NM_00130 | 218914 | Wapal      | A530089A2  |
| chr7  | 1.13E+08 | 1.13E+08 | intron (NM | CpG        | 288     | NM_02530 | 27397  | Mrpl17     | MRP-L26 F  |
| chr1  | 36996102 | 36996250 | exon (NM_  | exon (NM_  | 196     | NM_01887 | 56030  | Tmem131    | 2610524E0  |
| chr17 | 34973502 | 34973575 | promoter-1 | promoter-1 | 310     | NM_01944 | 54402  | Stk19      | G11 RP1    |
| chr5  | 1.23E+08 | 1.23E+08 | intron (NM | B1F2 SINE  | 1943    | NM_17542 | 109305 | Orai1      | D730049H0  |
| chr1  | 55188302 | 55188375 | intron (NM | CpG        | 249     | NM_02528 | 19070  | Mob4       | 2610109B1  |
| chr7  | 1.49E+08 | 1.49E+08 | intron (NM | intron (NM | 964     | NM_00116 | 66853  | Pnpla2     | 0610039C2  |
| chr15 | 77799927 | 77801875 | intron (NM | CpG        | 353     | NM_01874 | 55944  | Eif3d      | 66/67kDa   |
| chr11 | 9091727  | 9091975  | promoter-1 | promoter-1 | -94     | NM_17825 | 268379 | Abca13     | 9830132L2  |
| chr4  | 1.09E+08 | 1.09E+08 | promoter-1 | promoter-1 | -474    | NM_02745 | 70533  | Btf3l4     | 4632412E0  |
| chr8  | 18842577 | 18842775 | Intergenic | Charlie1 D | -3603   | NM_02679 | 52123  | Agpat5     | 1110013AC  |
| chr3  | 51322552 | 51322825 | 3' UTR (NV | 3' UTR (NV | 34800   | NM_01685 | 19338  | Rab33b     | -          |
| chr14 | 69605677 | 69605950 | Intergenic | Intergenic | -41533  | NM_00928 | 20855  | Stc1       | Stc        |
| chr4  | 66482902 | 66483225 | Intergenic | Intergenic | -5782   | NM_02129 | 21898  | Tlr4       | Lps Ly87 F |
| chr2  | 1.19E+08 | 1.19E+08 | promoter-1 | promoter-1 | -161    | NM_02657 | 68142  | Ino80      | 2310079N1  |
| chr17 | 71094052 | 71094150 | intron (NM | intron (NM | 102016  | NM_00116 | 21815  | Tgif1      | AA959811   |
| chr9  | 1.14E+08 | 1.14E+08 | intron (NM | intron (NM | -35889  | NM_00108 | 22221  | Ubp1       | Cp2b LBP-  |
| chr15 | 1E+08    | 1E+08    | Intergenic | Lx8 LINE L | -7577   | NM_13409 | 68614  | Letmd1     | 1110019O1  |
| chr11 | 83727677 | 83727775 | Intergenic | Intergenic | -27866  | NM_03009 | 78394  | Ddx52      | 2700029CC  |
| chr5  | 1.23E+08 | 1.23E+08 | non-coding | non-coding | 121     | NM_00111 | 11938  | Atp2a2     | 9530097L1  |
| chr12 | 98395302 | 98395450 | Intergenic | Intergenic | 1102171 | NM_00807 | 14420  | Galc       | 2310068BC  |
| chr5  | 97347002 | 97347125 | Intergenic | Intergenic | -79645  | NM_08070 | 140780 | Bmp2k      | 4933417M   |
| chr15 | 79239627 | 79239850 | Intergenic | MLT1K LTF  | -6005   | NM_17260 | 223693 | Tmem184k   | 2610507A1  |
| chr13 | 97754027 | 97754175 | Intergenic | Intergenic | 50216   | NM_02558 | 66479  | 1700029F1- | -          |
| chr10 | 80783927 | 80784225 | exon (NM_  | exon (NM_  | 228     | NM_02738 | 70312  | Cactin     | 2510012J0  |
| chr16 | 11254077 | 11254300 | TTS (NR_03 | TTS (NR_03 | 230     | NM_00113 | 14852  | Gspt1      | AI314175 , |
| chr16 | 4880627  | 4880700  | promoter-1 | promoter-1 | -812    | NM_14535 | 207740 | Ubald1     | 1500031HC  |
| chr19 | 33297002 | 33297200 | intron (NM | intron (NM | 169684  | NM_00116 | 67795  | Rnls       | 6530404N2  |
| chr11 | 1E+08    | 1E+08    | exon (NM_  | exon (NM_  | 631     | NM_01979 | 56354  | Dnajc7     | 2010003F2  |
| chr1  | 1.36E+08 | 1.36E+08 | Intergenic | CpG        | -3604   | NM_15289 | 75605  | Kdm5b      | 2010009J1  |
| chr1  | 1.58E+08 | 1.58E+08 | intron (NM | intron (NM | 1108    | NM_00113 | 11352  | Abl2       | AA536808   |
| chr9  | 50287252 | 50287350 | Intergenic | Intergenic | -15329  | NM_02963 | 76509  | Plet1      | 0610037B2  |
| chr7  | 30857352 | 30857500 | intron (NM | intron (NM | 416     | NM_17788 | 330502 | Zfp82      | A030010D0  |
| chr1  | 1.58E+08 | 1.58E+08 | intron (NM | intron (NM | 16941   | NM_02326 | 104009 | Qsox1      | 1300003HC  |
| chr6  | 1.38E+08 | 1.38E+08 | promoter-1 | promoter-1 | -420    | NM_01994 | 56615  | Mgst1      | 1500002K1  |
| chr5  | 53845552 | 53845700 | Intergenic | Intergenic | -101392 | NM_00108 | 19664  | Rbpj       | AI843960 0 |
| chr8  | 87514577 | 87514650 | exon (NM_  | exon (NM_  | 119     | NM_00116 | 170833 | Hook2      | A630054I0  |
| chr1  | 1.88E+08 | 1.88E+08 | intron (NM | CpG        | 176     | NM_14610 | 226791 | Lyplal1    | BC027340   |
| chr2  | 1.64E+08 | 1.64E+08 | 5' UTR (NV | 5' UTR (NV | 105     | NM_01875 | 54401  | Ywhab      | 1300003C1  |
| chr9  | 1.22E+08 | 1.22E+08 | Intergenic | Lx8 LINE L | -9065   | NM_01001 | 13124  | Cyp8b1     | -          |
| chr2  | 1.27E+08 | 1.27E+08 | intron (NM | intron (NM | 720     | NM_02322 | 66552  | Sppl2a     | 2010106G0  |
| chr11 | 97677052 | 97677225 | intron (NM | intron (NM | 16152   | NM_01068 | 16796  | Lasp1      | AA408629   |
| chr16 | 38433102 | 38433325 | promoter-1 | promoter-1 | 12      | NM_13410 | 85031  | Pla1a      | AA986889   |
| chr10 | 75700777 | 75700975 | promoter-1 | promoter-1 | -266    | NM_13318 | 15468  | Prmt2      | AI504737 I |
| chr9  | 59135952 | 59136075 | Intergenic | Intergenic | -3366   | NM_02812 | 72141  | Adpgk      | 2610017G0  |
| chr4  | 1.09E+08 | 1.09E+08 | promoter-1 | promoter-1 | 485     | NM_00130 | 12580  | Cdkn2c     | C77269 IN  |

|       |          |          |            |            |         |          |        |            |             |
|-------|----------|----------|------------|------------|---------|----------|--------|------------|-------------|
| chr11 | 82896602 | 82896975 | Intergenic | Intergenic | 18174   | NM_01140 | 20556  | Slfn2      | Shlf2       |
| chr2  | 35780477 | 35780675 | intron (NM | intron (NM | 54568   | NM_02977 | 74410  | Ttll11     | 4932702F0   |
| chr1  | 39635252 | 39635650 | Intergenic | Intergenic | -1259   | NM_00103 | 67702  | Rnf149     | 1600023E1   |
| chr3  | 1.58E+08 | 1.58E+08 | promoter-1 | promoter-1 | -417    | NM_00101 | 433667 | Ankrd13c   | AI505652 ,  |
| chr1  | 1.87E+08 | 1.87E+08 | promoter-1 | promoter-1 | 15      | NM_14551 | 226778 | Mark1      | AW491150    |
| chr16 | 25805052 | 25805175 | intron (NM | intron (NM | 3111    | NM_00112 | 22061  | Trp63      | AI462811 I  |
| chr2  | 1.22E+08 | 1.22E+08 | exon (NM_  | exon (NM_  | 140     | NM_00103 | 214616 | Spata5l1   | AV141009    |
| chr1  | 80753727 | 80753800 | intron (NM | intron (NM | 1365    | NM_17529 | 210293 | Dock10     | 9330153B1   |
| chr3  | 67371127 | 67371200 | Intergenic | Intergenic | -15527  | NM_02581 | 66868  | Mfsd1      | 1200003O0   |
| chr13 | 17787202 | 17787275 | promoter-1 | promoter-1 | -9      | NM_02547 | 66308  | Mplkip     | 2810021BC   |
| chr11 | 7662627  | 7662825  | Intergenic | MTEa-int L | -548800 | NM_00834 | 16009  | Igfbp3     | AI649005 I  |
| chr1  | 72264852 | 72265175 | Intergenic | Intergenic | -6132   | NM_00100 | 381269 | Mreg       | Gm974 W0    |
| chr16 | 18655227 | 18655900 | Intergenic | Intergenic | -25532  | NM_21361 | 18951  | 5-Sep      | Cdcrel-1 C0 |
| chr8  | 82848702 | 82848800 | Intergenic | Intergenic | -169193 | NM_01036 | 14934  | Gypa       | AI853584 0  |
| chr11 | 1.19E+08 | 1.19E+08 | Intergenic | Intergenic | -1225   | NM_00762 | 12418  | Cbx4       | MPC2 PC2    |
| chr15 | 27911927 | 27912075 | intron (NM | intron (NM | 43602   | NM_00108 | 223435 | Trio       | 6720464I0   |
| chr14 | 65999727 | 66000050 | intron (NM | intron (NM | 22375   | NM_19902 | 380912 | Zfp395     | BC053701    |
| chr6  | 1.16E+08 | 1.16E+08 | intron (NM | intron (NM | 33155   | NM_03117 | 81896  | lft122     | C86139 W0   |
| chr3  | 8619452  | 8619575  | Intergenic | Intergenic | 47525   | NM_01042 | 15213  | Hey1       | AI316788 ,  |
| chr12 | 60141977 | 60142075 | Intergenic | Intergenic | 20422   | NM_03005 | 78232  | Trappc6b   | 5830498C1   |
| chr12 | 56060602 | 56060900 | intron (NM | L1MB4 LIN  | 26572   | NM_01381 | 217578 | Baz1a      | Acf1 B9300  |
| chr11 | 51775352 | 51775475 | Intergenic | Intergenic | -5720   | NM_02997 | 52626  | Cdkn2aipnl | A430101BC   |
| chr13 | 95066152 | 95066225 | Intergenic | Intergenic | -10952  | NM_02915 | 107767 | Scamp1     | 4930505M    |
| chr3  | 87862352 | 87862675 | promoter-1 | promoter-1 | -96     | NM_14489 | 246703 | Apoa1bp    | AA087124    |
| chr8  | 11276327 | 11276450 | intron (NM | intron (NM | 36438   | NM_00993 | 12826  | Col4a1     | Bru Col4a-  |
| chr8  | 74066902 | 74067050 | intron (NM | CpG        | 147     | NM_02861 | 73711  | Mvb12a     | 1110012M    |
| chr2  | 31829977 | 31830225 | exon (NM_  | exon (NM_  | 131     | NM_17226 | 227720 | Nup214     | BC039282    |
| chr1  | 1.55E+08 | 1.55E+08 | Intergenic | Intergenic | 20654   | NM_02636 | 67771  | Arpc5      | 5830443F1   |
| chr4  | 97855802 | 97855950 | Intergenic | Intergenic | 194080  | NM_05315 | 94043  | Tm2d1      | 2310026L1   |
| chr6  | 1.17E+08 | 1.17E+08 | Intergenic | Intergenic | 7169    | NM_02605 | 67255  | Zfp422     | 2900028O2   |
| chr6  | 17644627 | 17644825 | intron (NM | CpG        | 732     | NM_00128 | 64213  | St7        | 9430001HC   |
| chr2  | 68817052 | 68817275 | intron (NM | intron (NM | 117549  | NM_17285 | 241447 | Cers6      | 4732462CC   |
| chr1  | 1.72E+08 | 1.72E+08 | Intergenic | Intergenic | -51143  | NM_02328 | 66977  | Nuf2       | 2410003CC   |
| chr15 | 50790702 | 50790950 | Intergenic | MLT1G3 L   | -69239  | NM_03200 | 83925  | Trps1      | AI115454 ,  |
| chr5  | 1.15E+08 | 1.15E+08 | intron (NM | intron (NM | 3602    | NM_02671 | 68420  | Ankrd13a   | 1100001D1   |
| chr3  | 1.44E+08 | 1.44E+08 | intron (NM | intron (NM | 1897    | NM_05310 | 93684  | 15-Sep     | 9430015PC   |
| chr18 | 55569027 | 55569375 | Intergenic | Intergenic | -419367 | NM_17575 | 269023 | Zfp608     | 4932417D1   |
| chr6  | 47870777 | 47871000 | intron (NM | CpG        | 321     | NM_00114 | 232784 | Zfp212     | Znf212 mk   |
| chr19 | 46432477 | 46432625 | intron (NM | intron (NM | 1181    | NM_02918 | 75146  | Tmem180    | 4930449AC   |
| chr9  | 63225602 | 63225700 | promoter-1 | promoter-1 | 8       | NM_01184 | 23938  | Map2k5     | AI324775 ,  |
| chrX  | 67718852 | 67718950 | intron (NM | intron (NM | 11317   | NM_00103 | 236848 | BC023829   | Tmem185a    |
| chr1  | 1.66E+08 | 1.66E+08 | intron (NM | intron (NM | 4398    | NM_00972 | 11931  | Atp1b1     | Atp4b Atp   |
| chr13 | 41664377 | 41664725 | Intergenic | Intergenic | -37034  | NM_00116 | 621976 | Tmem170k   | EG621976    |
| chr4  | 19841052 | 19841600 | intron (NM | intron (NM | 8387    | NM_17540 | 242341 | Atp6v0d2   | 1620401AC   |
| chr6  | 4928402  | 4928600  | intron (NM | intron (NM | 75181   | NM_18159 | 243725 | Ppp1r9a    | 2810430P2   |
| chr1  | 1.88E+08 | 1.88E+08 | Intergenic | Intergenic | 208208  | NM_00936 | 21808  | Tgfb2      | BB105277    |
| chr1  | 6959977  | 6960275  | Intergenic | B4A SINE   | -118875 | NM_18302 | 319263 | Pcmttd1    | 8430411F1   |

|       |          |          |            |            |         |          |          |          |             |
|-------|----------|----------|------------|------------|---------|----------|----------|----------|-------------|
| chr7  | 75294627 | 75294725 | intron (NM | intron (NM | 114443  | NM_03010 | 78444    | Pgpep1l  | C330024D1   |
| chr11 | 95274877 | 95275275 | promoter-1 | promoter-1 | -321    | NM_02528 | 20747    | Spop     | AI315626 I  |
| chr2  | 51893402 | 51893750 | promoter-1 | promoter-1 | -57     | NM_00939 | 21930    | Tnfaip6  | TSG-6 Tnfi  |
| chr19 | 41421552 | 41421650 | intron (NM | MIRb SINE  | 37959   | NM_03137 | 83490    | Pik3ap1  | 1810044J0   |
| chr12 | 1.04E+08 | 1.04E+08 | promoter-1 | promoter-1 | 632     | NM_00114 | 1.01E+08 | Gm20604  | AK010878-   |
| chr4  | 86336127 | 86336500 | Intergenic | Intergenic | -20350  | NM_00740 | 11520    | Plin2    | AA407157    |
| chr1  | 1.54E+08 | 1.54E+08 | exon (NM_  | exon (NM_  | 211     | NM_02567 | 66637    | Tsen15   | 5730449L1   |
| chr15 | 19787402 | 19787475 | Intergenic | Intergenic | 809067  | NM_02281 | 64833    | Acot10   | Acate3 MT   |
| chr14 | 21731052 | 21731225 | Intergenic | RMER15 L   | -17517  | NM_00950 | 22330    | Vcl      | 9430097D2   |
| chr8  | 1.25E+08 | 1.25E+08 | 5' UTR (NV | 5' UTR (NV | 147     | NM_00102 | 76014    | Zc3h18   | 1190001B2   |
| chr7  | 77789177 | 77789300 | Intergenic | Intergenic | -277606 | NM_18326 | 11819    | Nr2f2    | 2700033KC   |
| chr11 | 86359152 | 86359250 | promoter-1 | promoter-1 | 708     | NM_00119 | 56427    | Tubd1    | 4930550G1   |
| chr2  | 60722252 | 60722400 | intron (NM | MLT1M LT   | -2831   | NM_00114 | 56878    | Rbms1    | 2600014B1   |
| chr12 | 21423702 | 21423850 | promoter-1 | promoter-1 | -479    | NM_01173 | 22630    | Ywhaq    | 2700028PC   |
| chr9  | 96096927 | 96097125 | intron (NM | CpG        | 332     | NM_00118 | 211586   | Tfdp2    | 1110029IO   |
| chr5  | 1E+08    | 1E+08    | intron (NM | CpG        | 540     | NM_01669 | 50926    | Hnrnpdl  | AA407431    |
| chr12 | 71815127 | 71815250 | Intergenic | Intergenic | -111313 | NM_02812 | 319710   | Frmd6    | 2610019M    |
| chr11 | 60624552 | 60624625 | 5' UTR (NV | 5' UTR (NV | 179     | NM_00917 | 20425    | Shmt1    | AI324848 ,  |
| chr4  | 1.29E+08 | 1.29E+08 | intron (NM | CpG        | 701     | NM_01080 | 17357    | Marcksl1 | AL022768    |
| chr5  | 73578402 | 73578500 | intron (NM | intron (NM | 69406   | NM_02819 | 72313    | Fryl     | 2010313D2   |
| chr4  | 1.35E+08 | 1.35E+08 | Intergenic | Intergenic | 68937   | NM_01388 | 29876    | Clic4    | DOJmb3 TI   |
| chr11 | 82577852 | 82578025 | promoter-1 | promoter-1 | 91      | NM_02588 | 66983    | Zfp830   | 2410003C2   |
| chr17 | 34324752 | 34324925 | promoter-1 | promoter-1 | 337     | NM_01368 | 21354    | Tap1     | ABC17 AP1   |
| chr6  | 51738227 | 51738550 | Intergenic | Intergenic | 224160  | NM_01877 | 54353    | Skap2    | 2610021A1   |
| chr16 | 18877927 | 18878000 | intron (NM | intron (NM | 1120    | NM_01043 | 15260    | Hira     | AA138857    |
| chr15 | 25870202 | 25870450 | promoter-1 | promoter-1 | -131    | NM_00127 | 66270    | Fam134b  | 1810015CC   |
| chr4  | 1.26E+08 | 1.26E+08 | promoter-1 | promoter-1 | -11     | NM_01197 | 26445    | Psmb2    | AU045357    |
| chr1  | 1.35E+08 | 1.35E+08 | promoter-1 | promoter-1 | 87      | NM_00857 | 17248    | Mdm4     | 4933417NC   |
| chr10 | 95964777 | 95965100 | Intergenic | RMER15 L   | -114697 | NM_00756 | 12226    | Btg1     | AI426953 ,  |
| chr12 | 86679952 | 86680025 | exon (NM_  | exon (NM_  | 324     | NM_14513 | 217718   | Nek9     | C130021HC   |
| chr9  | 96918827 | 96919225 | promoter-1 | promoter-1 | -252    | NM_14513 | 211949   | Spsb4    | D030068E1   |
| chr2  | 48392527 | 48392750 | Intergenic | MLT1J LTR  | -276991 | NM_00739 | 11480    | Acvr2a   | ActrIIa Acv |
| chr17 | 43976077 | 43976200 | intron (NM | intron (NM | 35186   | NM_00128 | 53901    | Rcan2    | Csp2 Dscr1  |
| chr8  | 73132977 | 73133350 | promoter-1 | promoter-1 | -950    | NM_13377 | 76900    | Ssbp4    | 1210002E1   |
| chr4  | 1.29E+08 | 1.29E+08 | Intergenic | L3 LINE Cf | -22989  | NM_02921 | 75234    | Rnf19b   | 4930534K1   |
| chr4  | 1.52E+08 | 1.52E+08 | Intergenic | CpG        | -1585   | NM_20768 | 56226    | Espn     | je          |
| chr7  | 79372427 | 79372500 | intron (NM | intron (NM | 79018   | NM_00102 | 244049   | Mctp2    | Gm489       |
| chr18 | 62340177 | 62340275 | promoter-1 | promoter-1 | -591    | NM_00742 | 11555    | Adrb2    | Adrb-2 Bac  |
| chr1  | 1.84E+08 | 1.84E+08 | Intergenic | Intergenic | -36392  | NM_01205 | 27058    | Srp9     | 9kDa        |
| chr12 | 1.19E+08 | 1.19E+08 | Intergenic | MIRm SINI  | -85439  | NM_17593 | 217944   | Rapgef5  | 4932413M    |
| chr13 | 52768702 | 52768850 | Intergenic | Intergenic | 76525   | NM_01151 | 20963    | Syk      | Sykb        |
| chr4  | 41221802 | 41222050 | intron (NM | intron (NM | 242     | NM_02687 | 68926    | Ubap2    | 1190005KC   |
| chrX  | 45780252 | 45780325 | intron (NM | intron (NM | 36021   | NM_01968 | 56501    | Elf4     | AV314029    |
| chr2  | 1.57E+08 | 1.57E+08 | exon (NM_  | exon (NM_  | 172     | NM_00103 | 629499   | Mroh8    | 4922505G1   |
| chr17 | 46692752 | 46693050 | 5' UTR (NV | 5' UTR (NV | 210     | NM_02049 | 20807    | Srf      | AW049942    |
| chr15 | 78992852 | 78993050 | intron (NM | intron (NM | 1969    | NM_01143 | 20665    | Sox10    | Dom Sox2:   |
| chr14 | 64162527 | 64162725 | 5' UTR (NV | 5' UTR (NV | 164     | NM_17759 | 210376   | Mttr9    | 9430075G1   |

|       |          |          |                       |         |          |        |           |             |
|-------|----------|----------|-----------------------|---------|----------|--------|-----------|-------------|
| chr11 | 72990177 | 72990425 | promoter-1promoter-1  | 209     | NM_00116 | 66048  | Emc6      | 0610009E2   |
| chr10 | 1.27E+08 | 1.27E+08 | 5' UTR (NM 5' UTR (NM | 121     | NM_00928 | 20852  | Stat6     | -           |
| chrX  | 10816227 | 10816325 | Intergenic MIR SINE   | -60107  | NM_00111 | 1E+08  | Gm14483   | OTTMUSG(    |
| chr7  | 91033052 | 91033300 | promoter-1promoter-1  | -325    | NM_03070 | 80889  | Mesdc1    | AW061151    |
| chr5  | 1.21E+08 | 1.21E+08 | intron (NM intron (NM | 29696   | NM_14585 | 252972 | Tpcn1     | 5730403BC   |
| chr3  | 1.04E+08 | 1.04E+08 | promoter-1promoter-1  | 43      | NM_00116 | 18685  | Phtf1     | AU041898    |
| chr19 | 43598577 | 43598700 | intron (NM MIRc SINE  | 457     | NM_01032 | 14718  | Got1      | AI789014    |
| chr18 | 9734877  | 9735050  | intron (NM intron (NM | 27317   | NM_13044 | 140792 | Colec12   | CL-P1 SRCI  |
| chr13 | 1.05E+08 | 1.05E+08 | Intergenic Intergenic | -1347   | NM_00100 | 59079  | Erbp2ip   | 1700028E0   |
| chr8  | 1.25E+08 | 1.25E+08 | intron (NM intron (NM | -16456  | NM_00969 | 11821  | Aprt      | C85684      |
| chr15 | 75812377 | 75812525 | exon (NM_ exon (NM_   | 264     | NM_00116 | 223648 | Ccdc166   | 2410075B1   |
| chr3  | 1.29E+08 | 1.29E+08 | exon (NM_ exon (NM_   | 56413   | NM_00128 | 18741  | Pitx2     | 9430085M    |
| chr9  | 85656002 | 85656150 | Intergenic L1MD3 LIN  | -13135  | NM_00108 | 108837 | Ibtk      | 5430411K1   |
| chr4  | 8490427  | 8490550  | intron (NM Lx8 LINE L | 27697   | NM_02151 | 59021  | Rab2a     | 9330148M    |
| chr8  | 23377302 | 23377550 | Intergenic Intergenic | -16487  | NM_19925 | 234129 | Tpte      | Pten2       |
| chr13 | 19287427 | 19287575 | Intergenic Intergenic | 200120  | NM_02427 | 76205  | Stard3nl  | 0610035N(   |
| chr3  | 19926502 | 19926925 | intron (NM intron (NM | 8597    | NM_00114 | 12807  | Hps3      | coa         |
| chr8  | 73131077 | 73131150 | intron (NM intron (NM | 1100    | NM_13377 | 76900  | Ssbp4     | 1210002E1   |
| chr5  | 66115952 | 66116100 | Intergenic Intergenic | -26931  | NM_00108 | 71521  | Pds5a     | 9030416H1   |
| chr19 | 4192202  | 4192375  | intron (NM CpG        | 114     | NM_03186 | 19045  | Ppp1ca    | Ppp1c disr  |
| chr10 | 82683802 | 82683875 | Intergenic RMER30 D   | 116724  | NM_17738 | 338365 | Slc41a2   | A230035L0   |
| chr11 | 82876702 | 82876975 | Intergenic Intergenic | -1776   | NM_01140 | 20556  | Sfn2      | Shlf2       |
| chr5  | 1.24E+08 | 1.24E+08 | intron (NM intron (NM | 386     | NM_02992 | 77573  | Vps33a    | 3830421M    |
| chr19 | 10916302 | 10916625 | promoter-1promoter-1  | -571    | NM_02304 | 65221  | Slc15a3   | Ci1 cl-1    |
| chr5  | 20208277 | 20208425 | 3' UTR (NM 3' UTR (NV | 179591  | NM_17299 | 68770  | Phtf2     | 1110054G2   |
| chr1  | 89694902 | 89695075 | Intergenic Intergenic | -5267   | NM_00911 | 20215  | Sag       | A930001K1   |
| chr2  | 10059002 | 10059275 | Intergenic Lx9 LINE L | -6828   | NM_01058 | 16425  | Itih2     | AI747202 I  |
| chr9  | 1.21E+08 | 1.21E+08 | intron (NM intron (NM | 15862   | NM_17511 | 67095  | Trak1     | 2310001H1   |
| chr7  | 80676427 | 80676500 | intron (NM intron (NM | 10169   | NM_00108 | 244059 | Chd2      | 2810013CC   |
| chr2  | 33308252 | 33308350 | 3' UTR (NM 3' UTR (NV | 15751   | NM_02794 | 71834  | Zbtb43    | 1700010E0   |
| chrX  | 1.03E+08 | 1.03E+08 | promoter-1promoter-1  | -126    | NM_00882 | 18655  | Pgk1      | Pgk-1       |
| chr11 | 61981977 | 61982300 | intron (NM intron (NM | -80348  | NM_00741 | 11541  | Adora2b   | A2BAR A2I   |
| chr11 | 6191177  | 6191425  | promoter-1promoter-1  | -299    | NM_00125 | 18293  | Ogdh      | 2210403E0   |
| chr4  | 28124152 | 28124300 | Intergenic Intergenic | -616055 | NM_00129 | 13841  | Epha7     | Cek11 Ebk   |
| chr10 | 62114227 | 62114350 | promoter-1promoter-1  | -342    | NM_05318 | 94213  | Ddx50     | 4933429BC   |
| chr4  | 21639377 | 21639525 | Intergenic RMER21A    | -15397  | NM_00129 | 51813  | Ccnc      | AI451004 ,  |
| chr5  | 65745277 | 65745750 | intron (NM MER20 DN   | 5863    | NM_03118 | 83379  | Klb       | AV071179    |
| chr4  | 10845927 | 10846150 | Intergenic Intergenic | 44393   | NM_02600 | 67157  | 2610301B2 | AI428449    |
| chr16 | 87440827 | 87440925 | promoter-1promoter-1  | -39     | NM_01692 | 53858  | Rwdd2b    | ORF5        |
| chr15 | 83970152 | 83970450 | Intergenic Intergenic | -16696  | NM_02942 | 75772  | Pnpla5    | 4833426H1   |
| chr2  | 30785227 | 30785575 | Intergenic Intergenic | -23120  | NM_13367 | 30934  | Tor1b     | 2610016F0   |
| chr11 | 76670277 | 76670400 | Intergenic Intergenic | -9828   | NM_00775 | 12874  | Cpd       | AA960140    |
| chr1  | 9803127  | 9803275  | intron (NM intron (NM | 14990   | NM_17754 | 170755 | Sgk3      | 2510015P2   |
| chr11 | 6315827  | 6316450  | intron (NM CpG        | 265     | NM_00890 | 268373 | Ppia      | 2700098CC   |
| chr7  | 1.34E+08 | 1.34E+08 | Intergenic Intergenic | -6627   | NM_01195 | 26417  | Mapk3     | Erk-1 Erk1  |
| chr7  | 50785727 | 50785850 | intron (NM intron (NM | 2753    | NM_00111 | 12489  | Cd33      | Siglec-3 gp |
| chr4  | 1.19E+08 | 1.19E+08 | Intergenic Intergenic | -75907  | NM_01065 | 16656  | Hivep3    | 2900056N(   |

|       |          |          |                     |             |        |           |        |            |            |
|-------|----------|----------|---------------------|-------------|--------|-----------|--------|------------|------------|
| chr1  | 1.89E+08 | 1.89E+08 | Intergenic          | Intergenic  | -14276 | NM_02604  | 67223  | Rrp15      | 2810430M   |
| chr16 | 36382977 | 36383275 | Intergenic          | Intergenic  | -15470 | NM_00108  | 1E+08  | BC100530   | -          |
| chr11 | 97171227 | 97171825 | Intergenic          | Intergenic  | -5504  | NM_02592  | 67036  | Mrpl45     | 2600005PC  |
| chr7  | 53423802 | 53424075 | intron (NML1MC4a LI |             | 11465  | NM_01151  | 20927  | Abcc8      | D930031Bz  |
| chr11 | 1.11E+08 | 1.11E+08 | Intergenic          | Intergenic  | 377410 | NM_00842  | 16518  | Kcnj2      | IRK1 Kcnf1 |
| chr2  | 85799927 | 85800075 | Intergenic          | RMER16-in   | 8779   | NM_00101  | 257936 | Olfr1028   | MOR198-3   |
| chr15 | 26508277 | 26508700 | intron (NM          | intron (NM  | 269661 | NM_17759  | 211147 | 11-Mar     | 9630025C2  |
| chr14 | 99498577 | 99499050 | exon (NM_           | exon (NM_   | 170    | NM_02932  | 52023  | Pibf1      | -          |
| chr7  | 26181252 | 26181600 | promoter-1          | promoter-1  | -420   | NM_01071  | 16890  | Lipe       | 4933403G1  |
| chr3  | 89578302 | 89578525 | intron (NM          | intron (NM  | 882    | NM_02731  | 70093  | Ube2q1     | 1110002CC  |
| chr3  | 68598377 | 68598550 | Intergenic          | Intergenic  | -75045 | NM_00116  | 68725  | 1110032F0  | AI115547   |
| chr1  | 1.93E+08 | 1.93E+08 | intron (NM          | CpG         | 894    | NM_14488  | 226849 | Ppp2r5a    | PR61alpha  |
| chr1  | 55144177 | 55144650 | promoter-1          | promoter-1  | 363    | NM_01047  | 15510  | Hspd1      | 60kDa Hsp  |
| chr1  | 1.34E+08 | 1.34E+08 | intron (NM          | intron (NM  | 2894   | NM_00792  | 13714  | Elk4       | 2310011G1  |
| chr11 | 1.21E+08 | 1.21E+08 | promoter-1          | promoter-1  | -76    | NM_02540  | 66179  | Ogfod3     | 111003110: |
| chr2  | 25463102 | 25463175 | intron (NM          | intron (NM  | 828    | NM_00102  | 227624 | Rabl6      | B230208H1  |
| chr1  | 1.84E+08 | 1.84E+08 | Intergenic          | Intergenic  | 47427  | NM_00785  | 13244  | Degs1      | AA536663   |
| chr9  | 56842752 | 56842825 | promoter-1          | promoter-1  | 13     | NM_01965  | 56294  | Ptpn9      | MEG2       |
| chr7  | 20216327 | 20216650 | TTS (NM_0           | TTS (NM_0   | -1701  | NM_00904  | 19698  | Relb       | shep       |
| chr16 | 43889427 | 43890050 | promoter-1          | promoter-1  | 51     | NM_02912  | 106248 | Qtrtd1     | 3110012M   |
| chr5  | 72614202 | 72614350 | intron (NR_         | intron (NR_ | 19694  | NM_15338  | 231287 | Atp10d     | 9830145H1  |
| chr17 | 66133052 | 66133200 | intron (NM          | CpG-6548    | 431    | NR_10446: | 70351  | Ppp4r1     | 3110001J1: |
| chr9  | 86358427 | 86358600 | promoter-1          | promoter-1  | 10     | NM_02739  | 70348  | Ube2cbp    | 261001810: |
| chr10 | 75227777 | 75227900 | promoter-1          | promoter-1  | -736   | NM_17254  | 104248 | Cabin1     | A330070M   |
| chr8  | 14039752 | 14040150 | intron (NM          | intron (NM  | 50376  | NM_00103  | 234086 | Erich1     | -          |
| chr11 | 79396927 | 79397200 | Intergenic          | Intergenic  | -7651  | NM_17554  | 268451 | Rab11fip4  | A730072L0  |
| chr8  | 1.27E+08 | 1.27E+08 | promoter-1          | promoter-1  | 554    | NM_19810  | 102058 | Exoc8      | AI414418 I |
| chr15 | 81278027 | 81278275 | intron (NM          | intron (NM  | -18595 | NM_01971  | 56438  | Rbx1       | 1500002P1  |
| chr11 | 62352927 | 62353050 | promoter-1          | promoter-1  | -225   | NM_02844  | 73139  | Cenpv      | 3110013HC  |
| chr1  | 10027827 | 10027925 | promoter-1          | promoter-1  | 364    | NR_10228: | 26754  | Cops5      | AI303502 C |
| chr16 | 49774727 | 49775050 | Intergenic          | Intergenic  | 75481  | NM_02868  | 73916  | lft57      | 4833420A1  |
| chr19 | 11733752 | 11733950 | intron (NM          | intron (NM  | 1198   | NM_00103  | 225922 | Oosp2      | Gm99 Plac  |
| chr1  | 1.62E+08 | 1.62E+08 | Intergenic          | Intergenic  | -54648 | NR_02811: | 67647  | 4930523CC- |            |
| chr15 | 72897377 | 72897450 | Intergenic          | Intergenic  | -5779  | NM_00116  | 76510  | Trappc9    | 1810044A2  |
| chr2  | 1.29E+08 | 1.29E+08 | promoter-1          | promoter-1  | -587   | NM_00129  | 19261  | Sirpa      | AI835480 I |
| chr16 | 20641827 | 20641975 | intron (NM          | intron (NM  | -9824  | NR_02748: | 21762  | Psm2       | 9430095HC  |
| chr14 | 31683177 | 31683400 | intron (NM          | intron (NM  | -9155  | NM_18139  | 66175  | Mustn1     | 1110028GC  |
| chr10 | 85379777 | 85380000 | promoter-1          | promoter-1  | -198   | NM_18165  | 72843  | Prdm4      | 1700031E1  |
| chr2  | 39081627 | 39081975 | promoter-1          | promoter-1  | 57     | NM_02420  | 67857  | Ppp6c      | 2310003C1  |
| chr8  | 41393727 | 41393800 | promoter-1          | promoter-1  | 358    | NM_03011  | 78506  | Micu3      | 2900075B1  |
| chr13 | 74631452 | 74631600 | promoter-1          | promoter-1  | -128   | NM_14623  | 235956 | Zfp825     | -          |
| chr11 | 87236427 | 87236675 | intron (NM          | intron (NM  | -4542  | NM_00119  | 83560  | Tex14      | C85585     |
| chr8  | 73284352 | 73284575 | intron (NM          | intron (NM  | 357    | NM_18317  | 234384 | Mpv17l2    | Fksg24     |
| chr7  | 26840127 | 26840525 | Intergenic          | Intergenic  | -6188  | NM_00781  | 13089  | Cyp2b13    | -          |
| chr1  | 52078802 | 52079200 | intron (NM          | intron (NM  | 13913  | NM_01148  | 20849  | Stat4      | -          |
| chr1  | 1.53E+08 | 1.53E+08 | intron (NML1MD LINE |             | 54085  | NM_02201  | 63913  | Fam129a    | AI256368 , |
| chr6  | 1.43E+08 | 1.43E+08 | promoter-1          | promoter-1  | 59     | NM_00128  | 74741  | C2cd5      | 573041910: |

|       |          |          |             |             |         |          |        |           |            |
|-------|----------|----------|-------------|-------------|---------|----------|--------|-----------|------------|
| chr15 | 59248002 | 59248375 | intron (NM  | intron (NM  | 42435   | NM_00116 | 68501  | Nsmce2    | 1110014D1  |
| chr2  | 1.64E+08 | 1.64E+08 | intron (NM  | intron (NM  | 15928   | NM_00111 | 381404 | Pabpc1l   | 1810053BC  |
| chr11 | 1.14E+08 | 1.14E+08 | intron (NM  | intron (NM  | 3998    | NM_02000 | 56699  | Cdc42ep4  | 1500041M   |
| chr6  | 1.09E+08 | 1.09E+08 | exon (NM_   | exon (NM_   | 153     | NM_13867 | 192193 | Edem1     | A130059K2  |
| chr8  | 72876802 | 72877075 | 5' UTR (NV  | 5' UTR (NV  | 234     | NM_03068 | 19704  | Upf1      | B430202H1  |
| chr3  | 1.2E+08  | 1.2E+08  | Intergenic  | Intergenic  | -217157 | NM_01955 | 56195  | Ptbp2     | Ptb2 brPTI |
| chr3  | 83959402 | 83959550 | intron (NM  | CpG         | 232     | NM_02979 | 76915  | Mnd1      | 2610034E1  |
| chr8  | 1.29E+08 | 1.29E+08 | Intergenic  | Intergenic  | 112995  | NM_02421 | 67952  | Tomm20    | 1810060KC  |
| chr3  | 41966552 | 41966650 | Intergenic  | Intergenic  | 420061  | NM_02727 | 73852  | D3ErtD751 | 2810009O1  |
| chr14 | 21748952 | 21749150 | intron (NM  | MIR SINE    | 396     | NM_00950 | 22330  | Vcl       | 9430097D2  |
| chr8  | 92320577 | 92320775 | Intergenic  | Intergenic  | 551475  | NM_17291 | 244579 | Tox3      | 500-9 BC0  |
| chr3  | 1.04E+08 | 1.04E+08 | intron (NR_ | intron (NR_ | 3897    | NM_00130 | 15257  | Hipk1     | 1110062KC  |
| chr1  | 6204627  | 6204850  | promoter-1  | promoter-1  | -5      | NM_00982 | 12421  | Rb1cc1    | 2900055E0  |
| chr10 | 19886627 | 19886975 | intron (NM  | B1F SINE    | 18075   | NM_00119 | 17761  | Map7      | E-MAP-115  |
| chr12 | 1.19E+08 | 1.19E+08 | intron (NM  | CpG         | 17486   | NM_17593 | 217944 | Rapgef5   | 4932413M   |
| chr9  | 72487627 | 72488200 | Intergenic  | Intergenic  | -22241  | NM_01089 | 17999  | Nedd4     | AA959633   |
| chr6  | 40275427 | 40275675 | promoter-1  | promoter-1  | 74      | NM_02353 | 69923  | Agk       | 2610037M   |
| chr2  | 1.34E+08 | 1.34E+08 | Intergenic  | Intergenic  | -8819   | NM_02914 | 52837  | Tmx4      | 2810417DC  |
| chr9  | 50582702 | 50582875 | promoter-1  | promoter-1  | -542    | NM_13398 | 102580 | Alg9      | 8230402H1  |
| chr4  | 1.09E+08 | 1.09E+08 | promoter-1  | promoter-1  | -929    | NM_15339 | 230603 | Ttc39a    | 4922503NC  |
| chr2  | 1.46E+08 | 1.46E+08 | promoter-1  | promoter-1  | -276    | NM_02642 | 67877  | Naa20     | 1500004D1  |
| chr14 | 9097002  | 9097275  | Intergenic  | L1M4c LIN   | -5605   | NM_05311 | 93732  | Acox2     | THCCox     |
| chr11 | 3446052  | 3446200  | Intergenic  | Intergenic  | -6831   | NM_00128 | 29856  | Smtn      | smsmo      |
| chr15 | 80573527 | 80573800 | intron (NM  | intron (NM  | 31920   | NM_14481 | 213988 | Tnrc6b    | 2700090M   |
| chr6  | 17236602 | 17236825 | intron (NM  | intron (NM  | 5528    | NM_01690 | 12390  | Cav2      | AI447843   |
| chr13 | 16021752 | 16022225 | Intergenic  | Intergenic  | -84320  | NM_00838 | 16323  | Inhba     | -          |
| chr7  | 20148177 | 20148275 | promoter-1  | promoter-1  | -479    | NM_19914 | 232947 | Ppp1r37   | Gm158 Lrr  |
| chr12 | 1.06E+08 | 1.06E+08 | Intergenic  | ETnERV2-ir  | -25429  | NM_00110 | 238395 | Serpina3j | AI506554   |
| chr5  | 1.06E+08 | 1.06E+08 | intron (NR_ | CpG         | 376     | NM_01875 | 54367  | Zfp326    | 5730470H1  |
| chr3  | 27836477 | 27836575 | Intergenic  | Intergenic  | -1076   | NM_00116 | 18805  | Pld1      | AA536939   |
| chr6  | 99093777 | 99093975 | intron (NM  | intron (NM  | -115584 | NM_00119 | 108655 | Foxp1     | 3110052D1  |
| chr16 | 33830127 | 33830275 | intron (NM  | CpG         | 450     | NM_00114 | 16419  | Itgb5     | AA475909   |
| chr2  | 1.5E+08  | 1.5E+08  | promoter-1  | promoter-1  | 50      | NM_08057 | 68738  | Acss1     | 1110032O1  |
| chr17 | 66425902 | 66426050 | intron (NM  | CpG         | 410     | NM_00102 | 106585 | Ankrd12   | 2900001A1  |
| chr2  | 72034627 | 72034975 | intron (NM  | ID_B1 SINI  | -88893  | NM_02305 | 65964  | Zak       | AV006891   |
| chr6  | 1.14E+08 | 1.14E+08 | exon (NM_   | exon (NM_   | 298     | NM_00950 | 22346  | Vhl       | Vh1h       |
| chr19 | 34323152 | 34323250 | intron (NM  | intron (NM  | 6662    | NM_00739 | 11475  | Acta2     | 0610041GC  |
| chr1  | 87584377 | 87584450 | intron (NM  | B4A SINE    | 37788   | NM_01367 | 20684  | Sp100     | A430075G1  |
| chr14 | 1.03E+08 | 1.03E+08 | intron (NR_ | intron (NR_ | -25297  | NM_17771 | 239217 | Kctd12    | AU046135   |
| chr2  | 1.68E+08 | 1.68E+08 | Intergenic  | Intergenic  | -7226   | NM_01120 | 19246  | Ptpn1     | PTP-1B PTI |
| chr10 | 41355177 | 41355350 | Intergenic  | Intergenic  | -47704  | NM_00117 | 75973  | Ccdc162   | 5033413D2  |
| chr6  | 1.25E+08 | 1.25E+08 | Intergenic  | Intergenic  | -26665  | NM_01170 | 22371  | Vwf       | 6820430PC  |
| chr2  | 91570077 | 91570750 | 5' UTR (NV  | 5' UTR (NV  | 118     | NM_00108 | 228361 | Ambra1    | 2310079HC  |
| chr7  | 90807677 | 90807775 | intron (NM  | intron (NM  | 27199   | NM_02337 | 170460 | Stard5    | 2310058G2  |
| chr1  | 1.53E+08 | 1.53E+08 | Intergenic  | Intergenic  | -56815  | NM_00103 | 117198 | Ivns1abp  | 1190004M   |
| chr14 | 78936352 | 78937075 | promoter-1  | promoter-1  | -46     | NM_00116 | 219181 | Akap11    | 6330501D1  |
| chr3  | 5430627  | 5430925  | Intergenic  | Intergenic  | 145472  | NM_00116 | 19302  | Pex2      | D3ErtD138  |



|       |          |          |             |             |         |           |          |          |              |
|-------|----------|----------|-------------|-------------|---------|-----------|----------|----------|--------------|
| chr15 | 59538627 | 59538900 | Intergenic  | Intergenic  | 58554   | NM_14454  | 211770   | Trib1    | A5300900:    |
| chr5  | 65356827 | 65356925 | Intergenic  | Intergenic  | -4438   | NM_02666  | 68303    | Fam114a1 | 1190001NC    |
| chr13 | 49969752 | 49970025 | Intergenic  | ETnERV3-ir  | 192389  | NM_17201  | 105148   | Iars     | 2510016L1    |
| chr17 | 15577352 | 15577625 | Intergenic  | Intergenic  | 44278   | NM_02420  | 67544    | Fam120b  | 4932442KC    |
| chr2  | 1.58E+08 | 1.58E+08 | exon (NM_   | exon (NM_   | 4219    | NM_00950  | 22348    | Slc32a1  | R75019 VC    |
| chr1  | 1.27E+08 | 1.27E+08 | 5' UTR (NM  | 5' UTR (NM  | 141     | NM_02373  | 74117    | Actr3    | 1200003AC    |
| chr3  | 30891202 | 30891300 | Intergenic  | Intergenic  | -3442   | NM_00885  | 18759    | Prkci    | 2310021H1    |
| chr2  | 1.81E+08 | 1.81E+08 | intron (NM  | CpG         | 248     | NM_00932  | 21400    | Tcea2    | AI326274 !   |
| chr2  | 6134077  | 6134375  | promoter-1  | promoter-1  | -186    | NM_02420  | 67856    | Echdc3   | 2310005D1    |
| chr9  | 72297302 | 72297375 | exon (NM_   | exon (NM_   | 11002   | NM_00861  | 17427    | Mns1     | AW546487     |
| chr1  | 1.21E+08 | 1.21E+08 | exon (NM_   | exon (NM_   | 370     | NM_14610  | 226351   | Tmem185t | 2500001K1    |
| chr11 | 20991902 | 20992000 | intron (NM  | CpG         | 624     | NM_02332  | 67245    | Peli1    | 2810468L0    |
| chr11 | 80197252 | 80197500 | intron (NR_ | intron (NR_ | 595     | NM_00113  | 22680    | Zfp207   | 8430401D1    |
| chr15 | 9438102  | 9438400  | intron (NM  | intron (NM  | 21380   | NM_00837  | 16197    | Il7r     | CD127 IL-7   |
| chr11 | 68873277 | 68873350 | promoter-1  | promoter-1  | 36      | NM_02800  | 71923    | 2310047M | -            |
| chr13 | 80642152 | 80642600 | Intergenic  | Lx9 LINE L  | -380307 | NM_00104  | 105171   | Arrrdc3  | AI450344 i   |
| chr1  | 1.8E+08  | 1.8E+08  | exon (NM_   | exon (NM_   | 352     | NM_01680  | 51810    | Hnrnpu   | AA408410     |
| chr1  | 1.66E+08 | 1.66E+08 | intron (NM  | intron (NM  | 13239   | NM_00116  | 66352    | Blzf1    | 1700030GC    |
| chr6  | 1.13E+08 | 1.13E+08 | exon (NM_   | exon (NM_   | 43318   | NM_02838  | 72895    | Setd5    | 2900045NC    |
| chr3  | 1.21E+08 | 1.21E+08 | Intergenic  | Intergenic  | -39389  | NM_14539  | 213603   | Slc44a3  | BC010552     |
| chr12 | 76201502 | 76202025 | intron (NM  | MER110A     | 76556   | NM_17280  | 238271   | Kcnh5    | Eag2         |
| chrX  | 34666752 | 34666950 | promoter-1  | promoter-1  | 93      | NM_02593  | 67050    | Nkap     | 26100200C    |
| chr16 | 44138452 | 44138650 | intron (NM  | intron (NM  | 581     | NM_00750  | 11964    | Atp6v1a  | AI647066 ,   |
| chr1  | 1.46E+08 | 1.46E+08 | Intergenic  | ID_B1 SINf  | -5824   | NM_14599  | 214498   | Cdc73    | 8430414L1    |
| chr10 | 1.16E+08 | 1.16E+08 | promoter-1  | promoter-1  | 160     | NM_00100  | 216363   | Rab3ip   | B230311AC    |
| chr14 | 99678377 | 99678675 | Intergenic  | Intergenic  | -19384  | NM_00976  | 12224    | Klf5     | 4930520JO    |
| chr2  | 1.3E+08  | 1.3E+08  | promoter-1  | promoter-1  | 373     | NM_17876  | 319513   | Pced1a   | A930025DC    |
| chrX  | 50342052 | 50342150 | intron (NM  | intron (NM  | 846     | NM_01355  | 15452    | Hprt     | C81579 HF    |
| chr14 | 48187802 | 48188025 | exon (NM_   | exon (NM_   | 196     | NM_17259  | 1.01E+08 | Atg14    | 4832427M     |
| chr6  | 87445877 | 87445975 | exon (NM_   | exon (NM_   | 395     | NR_10448: | 232201   | Arhgap25 | A130039I2    |
| chr5  | 1.41E+08 | 1.41E+08 | intron (NM  | intron (NM  | 3443    | NM_00849  | 16848    | Lfng     | AW061165     |
| chr17 | 51243777 | 51243850 | intron (NM  | intron (NM  | 54890   | NM_00128  | 72238    | Tbc1d5   | 1600014NC    |
| chr16 | 16983627 | 16983750 | 5' UTR (NM  | 5' UTR (NM  | 213     | NM_00103  | 26413    | Mapk1    | 9030612K1    |
| chr11 | 44163177 | 44163425 | Intergenic  | Intergenic  | -50264  | NM_00835  | 16160    | Il12b    | Il-12b Il-12 |
| chr8  | 13685702 | 13685925 | Intergenic  | Intergenic  | -8226   | NM_00902  | 19414    | Rasa3    | AI326412 !   |
| chr8  | 1.27E+08 | 1.27E+08 | intron (NM  | intron (NM  | 19794   | NM_13927  | 108148   | Galnt2   | AI480629     |
| chr1  | 1.59E+08 | 1.59E+08 | promoter-1  | promoter-1  | 100     | NM_17764  | 226525   | Rasal2   | 6530401P1    |
| chr18 | 34963902 | 34963975 | intron (NM  | intron (NM  | 27276   | NM_00108  | 277250   | Kdm3b    | 5830462I2:   |
| chr6  | 49023902 | 49023975 | exon (NM_   | exon (NM_   | 144     | NM_02935  | 75593    | Malsu1   | 2410003K1    |
| chr6  | 87885127 | 87885300 | intron (NM  | intron (NM  | 21243   | NM_17373  | 232210   | Hmces    | 8430410A1    |
| chr11 | 1.06E+08 | 1.06E+08 | promoter-1  | promoter-1  | -607    | NM_19829  | 21763    | Tex2     | 4930568E0    |
| chr1  | 1.66E+08 | 1.66E+08 | Intergenic  | Intergenic  | 25194   | NM_00116  | 20343    | Sell     | AI528707 !   |
| chr2  | 1.67E+08 | 1.67E+08 | intron (NM  | intron (NM  | 940     | NM_01983  | 56336    | B4galt5  | 9430078I0:   |
| chr6  | 38303127 | 38303200 | intron (NM  | intron (NM  | 1440    | NM_02886  | 78781    | Zc3hav1  | 1200014N1    |
| chr11 | 98011277 | 98011375 | promoter-1  | promoter-1  | -396    | NM_02814  | 72194    | Fbxl20   | 2610511F2    |
| chr1  | 1.68E+08 | 1.68E+08 | Intergenic  | Intergenic  | -7329   | NM_00108  | 68481    | Mpzl1    | 1110007A1    |
| chr9  | 1.24E+08 | 1.24E+08 | Intergenic  | Intergenic  | 8741    | NM_00987  | 12581    | Cdkn2d   | INK4d p19    |

|       |          |          |             |             |         |           |        |           |            |
|-------|----------|----------|-------------|-------------|---------|-----------|--------|-----------|------------|
| chr7  | 1.18E+08 | 1.18E+08 | TTS (NM_0   | TTS (NM_0   | 2768    | NM_00962  | 11535  | Adm       | AM         |
| chr5  | 1.38E+08 | 1.38E+08 | promoter-1  | promoter-1  | 71      | NM_00100  | 381678 | Zcwpw1    | Gm1053     |
| chr4  | 1.03E+08 | 1.03E+08 | intron (NM  | intron (NM  | -75983  | NM_00116  | 67344  | Tctex1d1  | 170005501  |
| chr1  | 1.52E+08 | 1.52E+08 | intron (NM  | MIRm SINI   | 1351    | NM_00886  | 18783  | Pla2g4a   | Pla2g4 cPL |
| chr19 | 21940352 | 21940500 | Intergenic  | Intergenic  | 87596   | NM_03199  | 83921  | Tmem2     | -          |
| chr5  | 1.39E+08 | 1.39E+08 | promoter-1  | promoter-1  | 439     | NM_02139  | 11781  | Ap4m1     | 4930443L0  |
| chr19 | 29302652 | 29302775 | Intergenic  | Intergenic  | -23580  | NM_00104  | 16452  | Jak2      | Fd17       |
| chr3  | 1.31E+08 | 1.31E+08 | Intergenic  | Intergenic  | -89747  | NM_02894  | 74442  | Sgms2     | 4933405A1  |
| chr1  | 63159802 | 63160000 | intron (NM  | intron (NM  | 940     | NM_00108  | 227195 | Ino80d    | 733040511: |
| chr19 | 25415502 | 25415600 | intron (NM  | intron (NM  | 103859  | NM_18140  | 107351 | Kank1     | A930031BC  |
| chr7  | 1.28E+08 | 1.28E+08 | 5' UTR (NM  | 5' UTR (NM  | 242     | NM_02155  | 59052  | Mettl9    | 0610012DC  |
| chr16 | 10411977 | 10412200 | promoter-1  | promoter-1  | 57      | NM_01195  | 26425  | Nubp1     | -          |
| chr9  | 21920952 | 21921125 | Intergenic  | (TC)n Simp  | -2425   | NM_17077  | 66126  | Elof1     | 1110011K1  |
| chr13 | 59105252 | 59105325 | intron (NM  | intron (NM  | 196230  | NM_00102  | 18212  | Ntrk2     | GP145-Trkl |
| chr2  | 1.19E+08 | 1.19E+08 | promoter-1  | promoter-1  | -704    | NM_02961  | 76464  | Casc5     | 2310043DC  |
| chr13 | 76438177 | 76438375 | Intergenic  | Intergenic  | -84133  | NM_03017  | 78771  | Mctp1     | 2810465F1  |
| chr16 | 6715527  | 6715600  | intron (NM  | intron (NM  | -354365 | NM_18318  | 268859 | Rbfox1    | A2bp A2bp  |
| chr9  | 1.15E+08 | 1.15E+08 | exon (NM_   | exon (NM_   | 235     | NM_13397  | 102545 | Cmtm7     | AI481279   |
| chr1  | 1.84E+08 | 1.84E+08 | Intergenic  | Intergenic  | -15517  | NM_01205  | 27058  | Srp9      | 9kDa       |
| chr11 | 83285802 | 83285875 | promoter-1  | promoter-1  | -772    | NM_02742  | 70439  | Taf15     | 2610111C2  |
| chr5  | 91119077 | 91119250 | Intergenic  | Intergenic  | -49650  | NM_02847  | 73246  | Rassf6    | 1600016B1  |
| chr17 | 28993077 | 28993275 | Intergenic  | Intergenic  | -2180   | NM_00103  | 433091 | Pnpla1    | -          |
| chr12 | 1.14E+08 | 1.14E+08 | promoter-1  | promoter-1  | -44     | NM_19841  | 70435  | Inf2      | 2610204M   |
| chr4  | 44025202 | 44025375 | promoter-1  | promoter-1  | -227    | NM_01676  | 12757  | Clta      | AV026556   |
| chr1  | 16090252 | 16090325 | Intergenic  | B3A SINE    | 4226    | NM_01129  | 19989  | Rpl7      | Rpl7a Surf |
| chr12 | 85230027 | 85230425 | intron (NR_ | intron (NR_ | -12464  | NM_00127  | 18222  | Numb      | Nb         |
| chr5  | 86905677 | 86905775 | Intergenic  | Intergenic  | -7711   | NM_00103  | 194597 | Tmprss11a | Gm7        |
| chr4  | 1.33E+08 | 1.33E+08 | Intergenic  | Intergenic  | -23622  | NM_00116  | 230789 | Fam76a    | -          |
| chr2  | 25110952 | 25111175 | promoter-1  | promoter-1  | 104     | NM_17734  | 227615 | Tmem203   | C730025P1  |
| chr1  | 51594902 | 51595050 | Intergenic  | Intergenic  | -59733  | NM_02869  | 109019 | Nabp1     | 4930434HC  |
| chr4  | 46402027 | 46402375 | promoter-1  | promoter-1  | 94      | NM_02908  | 74753  | 5830415F0 | AV014846   |
| chr2  | 65076827 | 65076900 | promoter-1  | promoter-1  | -180    | NM_02722  | 319876 | Cobll1    | 1810047P1  |
| chr4  | 1.09E+08 | 1.09E+08 | Intergenic  | CpG         | 8001    | NM_00767  | 12580  | Cdkn2c    | C77269 IN  |
| chr2  | 1.81E+08 | 1.81E+08 | promoter-1  | promoter-1  | 33      | NM_19816  | 229004 | Gmeb2     | AI839884   |
| chr2  | 59617477 | 59617800 | intron (NM  | intron (NM  | 103025  | NM_00115  | 72137  | Wdsub1    | 1700048E1  |
| chr16 | 21955527 | 21955950 | 3' UTR (NV  | 3' UTR (NV  | -8113   | NR_03777: | 66664  | Tmem41a   | 2900010KC  |
| chr17 | 12708027 | 12708300 | Intergenic  | Intergenic  | -7593   | NM_01139  | 20519  | Slc22a3   | EMT Oct3   |
| chr8  | 89148152 | 89148350 | exon (NM_   | exon (NM_   | 309     | NM_02582  | 66887  | Lonp2     | 1300002AC  |
| chr8  | 88079302 | 88079600 | promoter-1  | promoter-1  | -281    | NM_01979  | 56445  | Dnaja2    | 1500017M   |
| chr7  | 25187102 | 25187250 | intron (NM  | MER58A D    | 2529    | NM_02804  | 71997  | Smg9      | 1500002O:  |
| chr1  | 1.73E+08 | 1.73E+08 | intron (NM  | intron (NM  | 1147    | NM_00100  | 226652 | Arhgap30  | 6030405PC  |
| chr7  | 1.06E+08 | 1.06E+08 | intron (NM  | CpG         | 591     | NM_17228  | 233545 | 2210018M  | 2310016L0  |
| chr1  | 87690202 | 87690550 | 5' UTR (NV  | 5' UTR (NV  | 354     | NM_13378  | 12283  | Cab39     | AA408805   |
| chr10 | 98400402 | 98400550 | intron (NM  | intron (NM  | 22690   | NM_02648  | 67972  | Atp2b1    | 281044212: |
| chr3  | 1.3E+08  | 1.3E+08  | intron (NM  | intron (NM  | 1309    | NM_00119  | 619547 | Rpl34-ps1 | EG619547   |
| chr2  | 1.68E+08 | 1.68E+08 | non-coding  | non-coding  | 127     | NM_00129  | 18019  | Nfatc2    | AI607462   |
| chr15 | 54567902 | 54568025 | Intergenic  | Lx9 LINE L  | -9520   | NM_01093  | 18133  | Nov       | C130088N:  |

|       |          |          |            |            |        |            |        |         |             |
|-------|----------|----------|------------|------------|--------|------------|--------|---------|-------------|
| chr11 | 79805827 | 79806200 | promoter-1 | promoter-1 | -595   | NM_00116   | 52615  | Suz12   | 261002801   |
| chr5  | 1.45E+08 | 1.45E+08 | intron (NM | intron (NM | 159    | NM_02741   | 70381  | Tecpr1  | 2210010NC   |
| chr2  | 27947577 | 27948075 | Intergenic | Intergenic | -7428  | NM_01019   | 14134  | Fcnb    | Fcn2        |
| chr8  | 80073427 | 80073600 | exon (NM_  | exon (NM_  | 217    | NM_00108   | 102182 | Prmt10  | AI931714 I  |
| chr14 | 55495677 | 55496000 | exon (NM_  | exon (NM_  | 537    | NM_00116   | 105651 | Ppp1r3e | A630071A1   |
| chr1  | 1.83E+08 | 1.83E+08 | intron (NM | intron (NM | 1002   | NM_14479   | 208795 | Tmem63a | BC014795    |
| chrX  | 66608852 | 66609125 | Intergenic | Intergenic | -4518  | NM_00803   | 14266  | Aff2    | FMR2P Fm    |
| chr6  | 85401002 | 85401300 | promoter-1 | promoter-1 | 145    | NM_00116   | 73327  | Pradc1  | 170004010:  |
| chr4  | 40670127 | 40670275 | promoter-1 | promoter-1 | 238    | NM_00116   | 15502  | Dnaja1  | Hsj2 Nedd   |
| chr11 | 45665902 | 45665975 | intron (NM | CpG        | 472    | NM_00104   | 216705 | Clint1  | AI642036 ,  |
| chr13 | 47028202 | 47028325 | Intergenic | Intergenic | -3176  | NM_01061   | 16553  | Kif13a  | 493050510:  |
| chr1  | 1.31E+08 | 1.31E+08 | Intergenic | Intergenic | -21650 | NM_00991   | 12767  | Cxcr4   | CD184 Cm    |
| chr2  | 24043127 | 24043275 | intron (NM | intron (NM | 1205   | NM_15351   | 215257 | Il1f9   | Il36g       |
| chr13 | 1.14E+08 | 1.14E+08 | promoter-1 | promoter-1 | 162    | NM_02815   | 72198  | Skiv2l2 | 2610528A1   |
| chr7  | 7230852  | 7230950  | promoter-1 | promoter-1 | 99     | NR_003555: | 76229  | Vmn2r29 | 6430701CC   |
| chr3  | 65222052 | 65222300 | Intergenic | Intergenic | -25701 | NM_02615   | 67437  | Ssr3    | 0610038PC   |
| chr12 | 58603377 | 58603500 | Intergenic | Lx8 LINE L | 43670  | NM_00825   | 15375  | Foxa1   | Hnf-3a Hnf: |
| chr11 | 1.15E+08 | 1.15E+08 | intron (NM | CpG        | 483    | NM_00825   | 15374  | Hn1     | -           |
| chr17 | 35804327 | 35804550 | promoter-1 | promoter-1 | 99     | NM_17513   | 68915  | Vars2   | 1190004I2:  |
| chr13 | 62960652 | 62960800 | promoter-1 | promoter-1 | -996   | NM_00799   | 14120  | Fbp2    | Fbp-1 Fbp:  |
| chr11 | 98821152 | 98821375 | promoter-1 | promoter-1 | -522   | NM_00117   | 19401  | Rara    | Nr1b1 RAF   |
| chr14 | 19071352 | 19071425 | 5' UTR (NV | 5' UTR (NV | 232    | NM_01158   | 353187 | Nr1d2   | RVR Rev-e   |
| chr4  | 4017102  | 4017400  | Intergenic | MTB LTR I  | -12590 | NM_00108   | 242286 | Sdr16c6 | 4833413O1:  |
| chr6  | 83780952 | 83781650 | 5' UTR (NV | 5' UTR (NV | 434    | NM_14616   | 232164 | Paip2b  | -           |
| chr1  | 1.29E+08 | 1.29E+08 | intron (NM | intron (NM | 86800  | NM_14512   | 107895 | Mgat5   | 4930471A2   |
| chr5  | 1.06E+08 | 1.06E+08 | Intergenic | Intergenic | -7735  | NM_00103   | 634650 | Gbp11   | EG634650    |
| chr2  | 72280877 | 72281150 | TTS (NM_0  | TTS (NM_0  | -33263 | NM_02586   | 66953  | Cdca7   | 2310021GC   |
| chr2  | 30297077 | 30297200 | intron (NM | intron (NM | 25568  | NM_13874   | 110854 | Ppp2r4  | 2610042B2   |
| chr12 | 35633927 | 35634000 | Intergenic | Intergenic | -32196 | NM_00127   | 79221  | Hdac9   | AV022454    |
| chr11 | 58120602 | 58120925 | intron (NM | CpG        | 192    | NM_00104   | 103836 | Zfp692  | AI746306 ,  |
| chr5  | 1.36E+08 | 1.36E+08 | promoter-1 | promoter-1 | -229   | NM_00974   | 12054  | Bcl7b   | -           |
| chr7  | 88049777 | 88049850 | exon (NM_  | exon (NM_  | 135    | NM_02652   | 68039  | Nmb     | 3110023K1   |
| chrX  | 91479977 | 91480050 | promoter-1 | promoter-1 | -256   | NM_00103   | 236904 | Klhl15  | 6330500C1   |
| chr12 | 33639227 | 33639350 | promoter-1 | promoter-1 | 237    | NM_19871   | 19027  | Sypl    | AI314763 ,  |
| chr7  | 3663952  | 3664250  | TTS (NM_0  | TTS (NM_0  | 7883   | NM_01109   | 18733  | Pirb    | Gp91 LIR-3  |
| chr1  | 1.36E+08 | 1.36E+08 | promoter-1 | promoter-1 | -336   | NM_14551   | 98710  | Rabif   | AI842864 ,  |
| chr1  | 62750477 | 62750575 | 5' UTR (NV | 5' UTR (NV | 635    | NM_00107   | 18187  | Nrp2    | 1110048PC   |
| chr1  | 4847527  | 4848350  | promoter-1 | promoter-1 | 163    | NM_01154   | 21399  | Tcea1   | S-II        |
| chr9  | 66891452 | 66891525 | exon (NM_  | exon (NM_  | 190    | NM_00116   | 22003  | Tpm1    | AA986836    |
| chr3  | 88330402 | 88330525 | Intergenic | Intergenic | -5854  | NM_00102   | 72640  | Mex3a   | 2700083E1   |
| chr15 | 88693352 | 88693475 | intron (NM | CpG-5224   | 789    | NM_14547   | 223775 | Pim3    | BC026639    |
| chr1  | 53841727 | 53841975 | intron (NM | CpG        | 208    | NM_13381   | 98267  | Stk17b  | 3110009AC   |
| chr6  | 1.27E+08 | 1.27E+08 | promoter-1 | promoter-1 | -240   | NM_18140   | 101187 | Parp11  | 5330431N2   |
| chr9  | 1.22E+08 | 1.22E+08 | intron (NM | intron (NM | 5579   | NM_02617   | 67469  | Abhd5   | 1300003DC   |
| chr11 | 96912702 | 96912800 | intron (NM | (CA)n Simf | 617    | NM_00108   | 71240  | Osbp17  | 4933437E1   |
| chr9  | 88146352 | 88146575 | Intergenic | L1_Mm LII  | -75984 | NM_01185   | 23959  | Nt5e    | 2210401F0   |
| chr11 | 83778177 | 83778250 | intron (NM | CpG        | 280    | NM_19434   | 217030 | Synrg   | Ap1gbp1 S   |

|       |          |          |                        |            |          |          |          |            |              |
|-------|----------|----------|------------------------|------------|----------|----------|----------|------------|--------------|
| chr5  | 12885002 | 12885150 | Intergenic             | Intergenic | 501910   | NM_02888 | 108151   | Sema3d     | 4631426B1    |
| chr4  | 1.17E+08 | 1.17E+08 | intron (NM CpG-10216   |            | 36881    | NM_02958 | 68777    | Tmem53     | 1110038M     |
| chr5  | 68236752 | 68236950 | intron (NM intron (NM  |            | 1819     | NM_00128 | 11980    | Atp8a1     | AI481521     |
| chr10 | 59791727 | 59792125 | intron (NR_intron (NR_ |            | -17673   | NM_00115 | 74048    | 4632428N(  | Dies1 PD-1   |
| chr7  | 49753677 | 49754000 | Intergenic             | Intergenic | -50388   | NM_02770 | 71162    | 493342110' | -            |
| chr8  | 1.23E+08 | 1.23E+08 | intron (NM intron (NM  |            | 4775     | NM_00832 | 15900    | Irf8       | AI893568     |
| chr1  | 1.09E+08 | 1.09E+08 | promoter-1             | promoter-1 | -384     | NM_17741 | 12043    | Bcl2       | AW986256     |
| chr11 | 46127977 | 46128325 | Intergenic             | MIR3 SINE  | -1790    | NM_00125 | 76884    | Cyfp2      | 150000410:   |
| chr10 | 42580002 | 42580125 | promoter-1             | promoter-1 | -255     | NM_17293 | 268297   | Scml4      | 9330161D1    |
| chr11 | 49472402 | 49472500 | Intergenic             | Intergenic | -4646    | NM_05403 | 68662    | Scgb3a1    | HIN-1 LuLe   |
| chr12 | 16904577 | 16904725 | intron (NM intron (NM  |            | 2867     | NM_00907 | 19878    | Rock2      | B230113H1    |
| chr8  | 13105077 | 13105150 | promoter-1             | promoter-1 | 230      | NM_17870 | 234069   | Pcid2      | A730042J0    |
| chr1  | 1.95E+08 | 1.95E+08 | intron (NM intron (NM  |            | 3488     | NM_14481 | 215303   | Camk1g     | CLICK-III Ca |
| chr2  | 72878327 | 72878450 | Intergenic             | Intergenic | -59885   | NM_00101 | 20687    | Sp3        | D130027J0    |
| chr11 | 50191927 | 50192125 | intron (NM CpG-1896    |            | 805      | NM_02151 | 59013    | Hnrnp1     | AI642080     |
| chr13 | 74147002 | 74147150 | intron (NM CpG         |            | 209      | NM_18283 | 72948    | Tppp       | 2900041AC    |
| chr7  | 1.37E+08 | 1.37E+08 | promoter-1             | promoter-1 | -1       | NM_17225 | 207425   | Wdr11      | 2900055P1    |
| chr16 | 18498827 | 18499050 | promoter-1             | promoter-1 | -26      | NM_00128 | 13972    | Gnb1l      | ESTM55 G     |
| chr1  | 1.73E+08 | 1.73E+08 | intron (NM MIR SINE    |            | 1192     | NM_01018 | 14127    | Fcer1g     | AI573376 C   |
| chr8  | 13676377 | 13676475 | intron (NM intron (NM  |            | 1161     | NM_00902 | 19414    | Rasa3      | AI326412 C   |
| chr5  | 98459352 | 98459525 | exon (NM_exon (NM_     |            | 543      | NM_13373 | 71914    | Antxr2     | 2310046B1    |
| chr2  | 72808402 | 72808775 | exon (NM_exon (NM_     |            | 8750     | NM_00109 | 20687    | Sp3        | D130027J0    |
| chr6  | 1.37E+08 | 1.37E+08 | intron (NM intron (NM  |            | 5397     | NM_00130 | 11857    | Arhgdib    | D4 Gdid4     |
| chr7  | 1.18E+08 | 1.18E+08 | intron (NM Charlie7 D  |            | 6162     | NM_19446 | 17540    | Mrvi1      | BB115629     |
| chr14 | 22838602 | 22838775 | promoter-1             | promoter-1 | -246     | NM_02827 | 76633    | 1700112E0  | 2700009F1    |
| chr6  | 82747327 | 82747625 | Intergenic             | Intergenic | -23028   | NM_01382 | 15277    | Hk2        | AI642394     |
| chr6  | 4561927  | 4562175  | intron (NM intron (NM  |            | 10985    | NM_14539 | 213819   | Casd1      | Cas1 Cast1   |
| chr2  | 1.8E+08  | 1.8E+08  | promoter-1             | promoter-1 | 488      | NM_17875 | 269397   | Ss18l1     | A230053O:    |
| chr6  | 75746427 | 75746525 | Intergenic             | Intergenic | -1446235 | NM_02888 | 74342    | Lrrtm1     | 4632401DC    |
| chr14 | 69929777 | 69929925 | Intergenic             | Intergenic | -17495   | NM_17342 | 239167   | Synb       | D930020EC    |
| chr9  | 21091052 | 21091275 | intron (NM intron (NM  |            | 1250     | NM_14541 | 215194   | Kri1       | -            |
| chr7  | 65914052 | 65914225 | exon (NM_exon (NM_     |            | 566      | NM_00972 | 11982    | Atp10a     | Atp10c pfa   |
| chr13 | 16042852 | 16043250 | Intergenic             | Intergenic | -63257   | NM_00838 | 16323    | Inhba      | -            |
| chr12 | 88688902 | 88689075 | intron (NML1MC4a LI    |            | 40192    | NM_01147 | 20773    | Sptlc2     | AI173915     |
| chr14 | 76813652 | 76814025 | Intergenic             | Intergenic | -1790    | NM_20765 | 21807    | Tsc22d1    | AA589566     |
| chr15 | 31531202 | 31531425 | promoter-1             | promoter-1 | 246      | NM_00763 | 12465    | Cct5       | Ccte TCPE    |
| chr9  | 48303577 | 48303975 | promoter-1             | promoter-1 | 328      | NM_00100 | 434402   | Gm5617     | EG434402     |
| chr6  | 82932552 | 82932800 | intron (NM intron (NM  |            | 35760    | NM_03307 | 110958   | M1ap       | D6Mm5e       |
| chr8  | 1.24E+08 | 1.24E+08 | Intergenic             | Intergenic | -21469   | NM_14560 | 234825   | Klhdc4     | AA408426     |
| chr12 | 74817102 | 74817225 | intron (NM intron (NM  |            | 131135   | NM_00885 | 18755    | Prkch      | Pkch         |
| chr5  | 1.08E+08 | 1.08E+08 | intron (NM intron (NM  |            | 22404    | NM_01698 | 1.01E+08 | Rpl5       | U21RNA       |
| chr17 | 28354677 | 28354875 | intron (NM intron (NM  |            | 10053    | NM_02718 | 23853    | Def6       | 2410003F0    |
| chr9  | 1.07E+08 | 1.07E+08 | promoter-1             | promoter-1 | 68       | NM_03073 | 81000    | Rad54l2    | Arip4 D13(   |
| chr15 | 78135852 | 78135925 | intron (NM intron (NM  |            | 263      | NM_00778 | 12984    | Csf2rb2    | AIC2A Beta   |
| chrX  | 1.5E+08  | 1.5E+08  | intron (NM intron (NM  |            | 1316     | NM_02732 | 70123    | 22100130:  | AI181827 '   |
| chr4  | 1.26E+08 | 1.26E+08 | Intergenic             | tRNA-Ala-C | -1748    | NM_01371 | 27096    | Trappc3    | 1110058K1    |
| chr7  | 88358302 | 88358450 | promoter-1             | promoter-1 | -314     | NM_00880 | 18584    | Pde8a      | AI551852     |

|       |          |          |                       |            |         |          |        |           |            |
|-------|----------|----------|-----------------------|------------|---------|----------|--------|-----------|------------|
| chr11 | 97296077 | 97296225 | Intergenic            | Intergenic | -15323  | NM_02149 | 58996  | Arhgap23  | A330041B1  |
| chr8  | 1.11E+08 | 1.11E+08 | Intergenic            | Intergenic | -10393  | NM_00749 | 11906  | Zfhx3     | A230102L0  |
| chr5  | 1.08E+08 | 1.08E+08 | intron (NML1ME2z LII  |            | 70188   | NM_01157 | 21814  | Tgfbr3    | 1110036H2  |
| chr13 | 38384152 | 38384300 | Intergenic            | Intergenic | -53359  | NM_00755 | 12161  | Bmp6      | D13Wsu11   |
| chr12 | 35731602 | 35731725 | promoter-1            | promoter-1 | -198    | NM_00101 | 217463 | Snx13     | Rgs-px1 m  |
| chr7  | 54270552 | 54270625 | Intergenic            | Intergenic | -6804   | NM_17531 | 101685 | Spty2d1   | 5830435K1  |
| chr4  | 1.2E+08  | 1.2E+08  | Intergenic            | Intergenic | -5955   | NM_01956 | 56222  | Cited4    | MRG-2 Mr   |
| chr2  | 1.56E+08 | 1.56E+08 | 3' UTR (NM 3' UTR (NM |            | 3232    | NM_02594 | 67067  | Romo1     | 201010001  |
| chr5  | 96432377 | 96432575 | Intergenic            | Intergenic | 46518   | NM_01886 | 55985  | Cxcl13    | 4631412M   |
| chr2  | 1.58E+08 | 1.58E+08 | intron (NM            | intron (NM | 2344    | NM_00950 | 22348  | Slc32a1   | R75019 VC  |
| chr14 | 26667802 | 26667925 | intron (NM            | intron (NM | 6222    | NM_01346 | 11744  | Anxa11    | A8300990:  |
| chr1  | 1.74E+08 | 1.74E+08 | intron (NM            | intron (NM | 5385    | NM_01348 | 12523  | Cd84      | A130013D:  |
| chr8  | 1.2E+08  | 1.2E+08  | Intergenic            | L1MB8 LIN  | -12536  | NM_02872 | 74032  | Sdr42e1   | 4632417NC  |
| chr15 | 75672852 | 75673000 | promoter-1            | promoter-1 | -588    | NM_17212 | 223642 | Zc3h3     | BC049953   |
| chr12 | 4234102  | 4234225  | exon (NM_             | exon (NM_  | 131     | NM_13404 | 52504  | Cenpo     | 2810429OC  |
| chr7  | 86772327 | 86772575 | Intergenic            | Intergenic | -9908   | NM_01979 | 56315  | Rhcg      | BB065800   |
| chr1  | 1.84E+08 | 1.84E+08 | intron (NM            | CpG        | 333     | NM_01205 | 27058  | Srp9      | 9kDa       |
| chr8  | 1.23E+08 | 1.23E+08 | intron (NM            | intron (NM | 2086    | NM_00116 | 234797 | 6430548M  | AW049007   |
| chr5  | 1.09E+08 | 1.09E+08 | 5' UTR (NM            | 5' UTR (NM | 172     | NM_02610 | 13486  | Dr1       | 1700121L0  |
| chr2  | 1.67E+08 | 1.67E+08 | intron (NM            | intron (NM | 4318    | NM_14553 | 407243 | Tmem189   | AI840826 I |
| chr11 | 11586227 | 11586475 | 5' UTR (NM            | 5' UTR (NM | 135     | NM_00102 | 22778  | Ikzf1     | 5832432G1  |
| chr10 | 80040602 | 80040675 | promoter-1            | promoter-1 | -597    | NM_07847 | 118445 | Klf16     | AI843742 I |
| chr8  | 1.25E+08 | 1.25E+08 | promoter-1            | promoter-1 | 71      | NM_14493 | 257633 | Acsf3     | BB101783   |
| chr16 | 24199977 | 24200125 | Intergenic            | Intergenic | -193385 | NM_17866 | 210126 | Lpp       | 9430020K1  |
| chr8  | 87187402 | 87187475 | promoter-1            | promoter-1 | -687    | NM_01049 | 15936  | Ier2      | AI317238 I |
| chr8  | 35884427 | 35884525 | Intergenic            | MER5B DN   | 13812   | NM_17693 | 319520 | Dusp4     | 2700078F2  |
| chr16 | 45029202 | 45030000 | Intergenic            | Intergenic | -64565  | NM_02643 | 67896  | Ccdc80    | 2610001E1  |
| chr16 | 13902477 | 13902725 | promoter-1            | promoter-1 | 637     | NM_00103 | 94184  | Pdxdc1    | 2210010A1  |
| chr13 | 99696002 | 99696225 | intron (NM            | CpG        | 226     | NM_17871 | 238799 | Tnpo1     | AU021749   |
| chr10 | 80894077 | 80894225 | Intergenic            | Intergenic | -4233   | NM_02675 | 18029  | Nfic      | 1110019L2  |
| chr3  | 1.44E+08 | 1.44E+08 | Intergenic            | Intergenic | 160358  | NM_00116 | 16911  | Lmo4      | A730077C1  |
| chr7  | 5013777  | 5014100  | exon (NM_             | exon (NM_  | 193     | NM_00120 | 22185  | U2af2     | 65kDa      |
| chr12 | 1.05E+08 | 1.05E+08 | intron (NM            | intron (NM | 14327   | NM_14483 | 217847 | Serpina10 | PZI ZPI    |
| chr4  | 1.33E+08 | 1.33E+08 | Intergenic            | PB1D10 SI  | 26968   | NM_01695 | 15331  | Hmgn2     | HMG-17 H   |
| chr15 | 78236552 | 78236725 | promoter-1            | promoter-1 | -349    | NM_00943 | 22117  | Tst       | Rhodanese  |
| chr15 | 11646152 | 11646550 | Intergenic            | Intergenic | 189078  | NM_00872 | 18162  | Npr3      | ANP-C ANI  |
| chr1  | 80022377 | 80023075 | Intergenic            | Intergenic | -167486 | NM_00925 | 20720  | Serpine2  | B230326M   |
| chr9  | 1.1E+08  | 1.1E+08  | Intergenic            | Intergenic | -4436   | NM_00869 | 18054  | Ngp       | bectenecin |
| chr2  | 1.37E+08 | 1.37E+08 | intron (NM            | intron (NM | 89126   | NM_00103 | 74243  | Slx4ip    | 2210009G2  |
| chr1  | 1.84E+08 | 1.84E+08 | intron (NM            | CpG        | 181     | NM_13381 | 98386  | Lbr       | AI505894 i |
| chr7  | 1.38E+08 | 1.38E+08 | Intergenic            | Intergenic | -18423  | NM_13394 | 101476 | Plekha1   | AA960558   |
| chr7  | 1.24E+08 | 1.24E+08 | Intergenic            | Intergenic | -9620   | NM_00113 | 53322  | Nucb2     | AI607786 I |
| chr4  | 1.34E+08 | 1.34E+08 | intron (NM            | CpG        | 220     | NM_00125 | 76824  | Mtfr1l    | 241016610! |
| chrX  | 68538727 | 68538900 | intron (NM            | intron (NM | 70556   | NM_01992 | 17772  | Mtm1      | AF073996   |
| chr13 | 43493727 | 43493900 | promoter-1            | promoter-1 | 68      | NM_02355 | 70078  | Nol7      | 2210008F1  |
| chr10 | 83996477 | 83996575 | exon (NM_             | exon (NM_  | 107     | NM_17545 | 216197 | Ckap4     | 5630400AC  |
| chr18 | 36440352 | 36440425 | promoter-1            | promoter-1 | -428    | NM_00898 | 19290  | Pura      | CAGER-1 P  |

|       |          |          |                        |         |           |        |          |            |
|-------|----------|----------|------------------------|---------|-----------|--------|----------|------------|
| chr15 | 99602452 | 99602625 | intron (NM CpG         | 408     | NM_02801  | 71949  | Cers5    | 2310081H1  |
| chr2  | 1.73E+08 | 1.73E+08 | intron (NR_CpG         | -8071   | NM_02730  | 70065  | Ankrd60  | 1700019A2  |
| chr12 | 87583077 | 87583150 | intron (NM CpG         | 285     | NM_02740  | 70373  | Gpatch2l | 17000200C  |
| chr6  | 52108052 | 52108200 | exon (NM_exon (NM_     | 190     | NM_01044  | 15394  | Hoxa1    | ERA1 Hox-  |
| chr18 | 35930877 | 35930975 | promoter-1promoter-1   | -287    | NM_01991  | 56550  | Ube2d2a  | 1500034DC  |
| chr12 | 71320202 | 71320500 | intron (NM intron (NM  | 8319    | NM_13319  | 110095 | Pygl     | -          |
| chr4  | 1.32E+08 | 1.32E+08 | intron (NM CpG-10420   | 433     | NM_14539  | 213541 | Ythdf2   | 9430020EO  |
| chr17 | 37139777 | 37139900 | promoter-1promoter-1   | 368     | NM_00101  | 22715  | Zfp57    | G19 Zfp-57 |
| chr6  | 1.29E+08 | 1.29E+08 | intron (NMRMER16-in    | 9101    | NM_00115  | 17057  | Klrb1a   | Ly55a NKR  |
| chr2  | 57765452 | 57765600 | Intergenic Intergenic  | -85040  | NM_17285  | 241391 | Galnt5   | 4832424J2  |
| chr1  | 57463252 | 57463925 | promoter-1promoter-1   | -70     | NM_00103  | 68736  | Tyw5     | 1110034BC  |
| chr3  | 1.58E+08 | 1.58E+08 | Intergenic Intergenic  | 82064   | NM_14595  | 107869 | Cth      | 0610010I1: |
| chr17 | 27993677 | 27993875 | intron (NM CpG         | 324     | NM_00108  | 224648 | Uhrf1bp1 | 1110020K1  |
| chr7  | 59237602 | 59237750 | intron (NM intron (NM  | 23408   | NR_027704 | 75744  | Svip     | 1700006C1  |
| chr19 | 5964377  | 5964600  | promoter-1promoter-1   | -282    | NM_00889  | 18969  | Pola2    | AI573378   |
| chr17 | 32042352 | 32042500 | Intergenic MTB LTR I   | -49689  | NM_01083  | 17691  | Sik1     | Msk Sik Sr |
| chr2  | 1.1E+08  | 1.1E+08  | intron (NM intron (NM  | 41847   | NM_17267  | 107515 | Lgr4     | 9130225GC  |
| chr13 | 41555327 | 41555475 | intron (NM intron (NM  | 27328   | NM_00111  | 18003  | Nedd9    | Cas-L CasL |
| chr10 | 39966727 | 39967050 | promoter-1promoter-1   | -43     | NM_02332  | 67239  | Rpf2     | 2810470K2  |
| chr2  | 1.19E+08 | 1.19E+08 | 5' UTR (NV 5' UTR (NV  | 361     | NM_00108  | 383787 | Ankrd63  | Gm1337     |
| chr1  | 93146952 | 93147125 | intron (NM CpG         | 142     | NM_02645  | 67921  | Ube2f    | 2510010F1  |
| chr10 | 1.21E+08 | 1.21E+08 | intron (NM CpG         | 455     | NM_13895  | 192678 | Rassf3   | AW212023   |
| chr8  | 1.22E+08 | 1.22E+08 | promoter-1promoter-1   | 3       | NM_02807  | 72042  | Cotl1    | 1810074P2  |
| chr13 | 37712152 | 37712300 | Intergenic Intergenic  | -205681 | NM_02683  | 68750  | Rreb1    | 1110037NC  |
| chr4  | 1.53E+08 | 1.53E+08 | promoter-1promoter-1   | 26      | NM_20122  | 72946  | Lrrc47   | 2900010DC  |
| chr4  | 1.34E+08 | 1.34E+08 | intron (NM CpG         | 242     | NM_00116  | 230809 | Pdik1l   | BC027088   |
| chr13 | 59749027 | 59749200 | intron (NM intron (NM  | 28032   | NM_00103  | 105348 | Golm1    | 2310001L0  |
| chr3  | 1.16E+08 | 1.16E+08 | promoter-1promoter-1   | -303    | NM_14490  | 229782 | Slc35a3  | 2310050P1  |
| chr14 | 32001902 | 32002150 | intron (NM intron (NM  | 17986   | NM_02265  | 64652  | Nisch    | 1200007DC  |
| chr3  | 1.46E+08 | 1.46E+08 | Intergenic Lx2B LINE   | -19489  | NM_02737  | 70285  | Rpf1     | 2210420E2  |
| chr1  | 93958377 | 93958475 | intron (NM intron (NM  | 86544   | NM_20722  | 208727 | Hdac4    | 4932408F1  |
| chr12 | 86523552 | 86523750 | Intergenic Intergenic  | -5388   | NM_00882  | 18654  | Pgf      | AI854365 I |
| chr10 | 43198727 | 43198875 | promoter-1promoter-1   | -145    | NM_19902  | 331623 | Bend3    | mKIAA155:  |
| chr9  | 1.06E+08 | 1.06E+08 | Intergenic Intergenic  | -9114   | NM_00116  | 665033 | Col6a5   | Col29a1 E  |
| chr5  | 1.14E+08 | 1.14E+08 | Intergenic Intergenic  | 9623    | NM_14616  | 231633 | Tmem119  | AW208946   |
| chr1  | 1.83E+08 | 1.83E+08 | exon (NM_exon (NM_     | 583     | NM_14551  | 226757 | Wdr26    | 1600024AC  |
| chr17 | 29628152 | 29628225 | intron (NM CpG         | 198     | NM_00884  | 18712  | Pim1     | Pim-1      |
| chr2  | 26215252 | 26215325 | promoter-1promoter-1   | -221    | NM_00103  | 332579 | Card9    | Gm782      |
| chr1  | 88295202 | 88295375 | Intergenic Intergenic  | -10572  | NM_01034  | 14767  | Nmur1    | FM-3 Gpr6  |
| chr1  | 75176527 | 75176725 | TTS (NM_0 TTS (NM_0    | 231     | NM_02373  | 74104  | Abcb6    | 1200005B1  |
| chr4  | 1.47E+08 | 1.47E+08 | intron (NM intron (NM  | 572     | NM_00964  | 11610  | Agtrap   | 3300002E1  |
| chr7  | 29926452 | 29926575 | intron (NR_intron (NR_ | 6561    | NR_045676 | 233046 | Rasgrp4  | -          |
| chr14 | 58617877 | 58618425 | promoter-1promoter-1   | -52     | NM_02864  | 68514  | Micu2    | 1110008L2  |
| chr1  | 1.73E+08 | 1.73E+08 | Intergenic MurERV4-i   | -14625  | NM_02538  | 66155  | Ufc1     | 1110021HC  |
| chr13 | 19974777 | 19975000 | Intergenic Intergenic  | -58762  | NM_18175  | 353346 | Gpr141   | PGR13      |
| chr5  | 1.01E+08 | 1.01E+08 | intron (NMLx8 LINE L   | 4911    | NM_13919  | 231507 | Plac8    | C15 D5Ws   |
| chr17 | 47825877 | 47825975 | promoter-1promoter-1   | -591    | NM_00116  | 66119  | Tomm6    | 1110002E2  |

|       |          |          |            |            |         |          |        |           |            |
|-------|----------|----------|------------|------------|---------|----------|--------|-----------|------------|
| chr9  | 43840077 | 43840325 | Intergenic | Intergenic | -11266  | NM_00938 | 21838  | Thy1      | CD90 T25   |
| chr5  | 52217477 | 52217775 | Intergenic | B4 SINE B  | -272466 | NM_00890 | 19017  | Ppargc1a  | A830037N0  |
| chr3  | 96532127 | 96532325 | promoter-1 | promoter-1 | 692     | NM_02640 | 67845  | Rnf115    | 2610028E0  |
| chr13 | 1.01E+08 | 1.01E+08 | promoter-1 | promoter-1 | -459    | NM_01142 | 20595  | Smn1      | AI849087 0 |
| chr5  | 28643177 | 28643375 | promoter-1 | promoter-1 | -453    | NM_02823 | 381626 | Rbm33     | 3200001K1  |
| chr7  | 71110777 | 71111000 | Intergenic | Intergenic | -27087  | NM_02136 | 50794  | Klf13     | 0610043C1  |
| chr10 | 80380877 | 80381050 | promoter-1 | promoter-1 | 27      | NM_01072 | 16907  | Lmnb2     | -          |
| chr5  | 1.51E+08 | 1.51E+08 | intron (NM | intron (NM | 10562   | NM_13389 | 100637 | N4bp211   | 2410024N1  |
| chr1  | 1.73E+08 | 1.73E+08 | Intergenic | Intergenic | -1419   | NM_14455 | 246256 | Fcgr4     | 4833442P2  |
| chr13 | 41823227 | 41823400 | Intergenic | Intergenic | 77182   | NM_00114 | 328231 | Gm5082    | A030008J0  |
| chr15 | 8394127  | 8394300  | 5' UTR (NM | 5' UTR (NM | 250     | NM_02770 | 71175  | Nipbl     | Idn3       |
| chr7  | 26730227 | 26730625 | Intergenic | Intergenic | 47749   | NM_00999 | 13088  | Cyp2b10   | Cyp2b Cyp  |
| chr13 | 50052577 | 50052675 | Intergenic | Intergenic | 275127  | NM_17201 | 105148 | Iars      | 2510016L1  |
| chr1  | 16095402 | 16095575 | promoter-1 | promoter-1 | -475    | NM_13383 | 98711  | Rdh10     | 3110069KC  |
| chr13 | 91641627 | 91641725 | intron (NM | MTC LTR I  | 40974   | NM_02418 | 66970  | Ssbp2     | 1500004KC  |
| chr7  | 1.3E+08  | 1.3E+08  | intron (NM | intron (NM | 75866   | NM_00112 | 70497  | Arhgap17  | 5730403H1  |
| chr2  | 1.8E+08  | 1.8E+08  | intron (NM | intron (NM | 1369    | NM_18316 | 228993 | Slc17a9   | 1700019HC  |
| chr1  | 1.37E+08 | 1.37E+08 | intron (NM | intron (NM | 1335    | NM_14541 | 215615 | Rnpep     | -          |
| chr7  | 1.35E+08 | 1.35E+08 | Intergenic | Intergenic | -46593  | NM_14559 | 233913 | BC017158  | -          |
| chr13 | 83089502 | 83089750 | Intergenic | Lx8 LINE L | -553407 | NM_00117 | 17260  | Mef2c     | 5430401D1  |
| chr9  | 1.09E+08 | 1.09E+08 | intron (NM | intron (NM | 18702   | NM_00892 | 19087  | Prkar2a   | 1110061A2  |
| chr2  | 49236852 | 49236950 | Intergenic | Intergenic | -70105  | NM_17266 | 227867 | Epc2      | 5830499L1  |
| chr12 | 4234927  | 4235000  | promoter-1 | promoter-1 | -669    | NM_13404 | 52504  | Cenpo     | 2810429OC  |
| chr1  | 83073902 | 83073975 | Intergenic | Intergenic | -38915  | NM_03055 | 80721  | Slc19a3   | A230084E2  |
| chr10 | 67223302 | 67223400 | Intergenic | Intergenic | 152059  | NM_17867 | 216049 | Zfp365    | AI839779 , |
| chr9  | 1.23E+08 | 1.23E+08 | intron (NM | CpG        | 111     | NM_17336 | 235682 | Zfp445    | AW610627   |
| chr8  | 27585002 | 27585200 | Intergenic | L3 LINE Cf | 316460  | NM_19904 | 73754  | Thap1     | 4833431AC  |
| chr10 | 76999502 | 76999650 | intron (NM | MTD LTR I  | 6483    | NM_00840 | 16414  | Itgb2     | 2E6 AI528! |
| chr2  | 84781527 | 84781900 | intron (NM | intron (NM | 4910    | NM_02139 | 58207  | Slc43a3   | Eeg1 SEEE! |
| chr12 | 92881502 | 92881575 | intron (NM | intron (NM | -52611  | NM_17533 | 83602  | Gtf2a1    | 6330549HC  |
| chr3  | 95720777 | 95720975 | Intergenic | Intergenic | -12304  | NM_00125 | 66471  | Anp32e    | 2810018A1  |
| chr9  | 63247477 | 63247550 | promoter-1 | promoter-1 | -462    | NM_02709 | 69478  | 2300009AC | -          |
| chr1  | 33870777 | 33871575 | intron (NM | CpG        | 264     | NM_13381 | 98403  | Zfp451    | 4930515K2  |
| chr1  | 1.34E+08 | 1.34E+08 | promoter-1 | promoter-1 | 81      | NM_00792 | 13714  | Elk4      | 2310011G1  |
| chr6  | 1.19E+08 | 1.19E+08 | intron (NM | intron (NM | -29450  | NM_00125 | 12288  | Cacna1c   | Cav1.2 Ccf |
| chr2  | 13496227 | 13496400 | exon (NM_  | exon (NM_  | 375     | NM_01170 | 22352  | Vim       | -          |
| chr12 | 1.03E+08 | 1.03E+08 | intron (NM | intron (NM | 18792   | NM_01685 | 51786  | Cpsf2     | 100kDa 26  |
| chr5  | 91218902 | 91219100 | Intergenic | Intergenic | 3874    | NM_20332 | 330122 | Cxcl3     | Dcip1 Gm1  |
| chr2  | 26453327 | 26453600 | intron (NM | L1MB3 LIN  | 6474    | NM_02621 | 67512  | Agpat2    | 2510002J0  |
| chr4  | 1.49E+08 | 1.49E+08 | intron (NM | B3 SINE B  | 2294    | NM_17337 | 100198 | H6pd      | AI785303 0 |
| chr1  | 10304927 | 10305125 | Intergenic | Intergenic | -82275  | NM_00110 | 211673 | Arfgef1   | ARFGEP1 E  |
| chr10 | 1.17E+08 | 1.17E+08 | Intergenic | Intergenic | -36922  | NM_00101 | 432508 | Cpsf6     | 4733401N1  |
| chr5  | 1.36E+08 | 1.36E+08 | intron (NM | B1_Mur4 S  | 22142   | NM_00889 | 18984  | Por       | 4933424M   |
| chr8  | 1.1E+08  | 1.1E+08  | promoter-1 | promoter-1 | -473    | NM_02555 | 66427  | Cyb5b     | 1810044O2  |
| chr3  | 1.54E+08 | 1.54E+08 | intron (NM | intron (NM | 30666   | NM_17517 | 209601 | Erich3    | 1700013E1  |
| chr1  | 80610002 | 80610225 | intron (NM | intron (NM | 51814   | NM_00128 | 210293 | Dock10    | 9330153B1  |
| chr12 | 66273627 | 66273875 | promoter-1 | promoter-1 | -184    | NM_17257 | 217653 | Mis18bp1  | 6720403H1  |

|       |          |          |             |            |        |          |        |            |            |
|-------|----------|----------|-------------|------------|--------|----------|--------|------------|------------|
| chr11 | 79092202 | 79092300 | Intergenic  | Intergenic | -24054 | NM_01965 | 78889  | Wsb1       | 1110056B1  |
| chr1  | 1.84E+08 | 1.84E+08 | Intergenic  | Intergenic | -28235 | NM_17337 | 209456 | Trp53bp2   | 53BP2 AI7  |
| chr15 | 63486277 | 63486550 | Intergenic  | Intergenic | 153881 | NM_03137 | 83492  | Gsdmc      | Gsdmc1 M   |
| chr9  | 34931402 | 34931775 | TTS (NM_0   | TTS (NM_0  | -7193  | NM_00917 | 20443  | St3gal4    | Siat4c     |
| chr13 | 55423027 | 55423375 | promoter-1  | promoter-1 | 140    | NM_00900 | 19336  | Rab24      | 6530406O   |
| chr1  | 1.3E+08  | 1.3E+08  | promoter-1  | promoter-1 | 605    | NM_18175 | 226412 | R3hdm1     | R3hdm      |
| chr17 | 9175852  | 9176000  | 3' UTR (NM  | 3' UTR (NM | -5272  | NM_02585 | 66931  | 1700010I1- |            |
| chr9  | 20766177 | 20766350 | Intergenic  | Intergenic | -1931  | NM_00119 | 13433  | Dnmt1      | Cxxc9 Dnr  |
| chr3  | 96000777 | 96001450 | exon (NM_   | exon (NM_  | 396    | NM_02697 | 69168  | Bola1      | 1810037G   |
| chr1  | 74600277 | 74600425 | intron (NM  | (GAA)n Sin | 9417   | NM_14893 | 18802  | Plcd4      | 4921507K2  |
| chr1  | 1.33E+08 | 1.33E+08 | intron (NM  | MER58B D   | 33892  | NM_01070 | 16865  | Eif2d      | D1Erd5e I  |
| chr5  | 1.37E+08 | 1.37E+08 | Intergenic  | CpG-11659  | -1041  | NM_00129 | 13047  | Cux1       | CDP Cut1   |
| chr12 | 88162302 | 88162425 | Intergenic  | Intergenic | 63401  | NM_14583 | 238330 | Irf2bp1    | 6430527G1  |
| chr9  | 90008777 | 90008925 | intron (NM  | CpG        | 807    | NM_00103 | 21761  | Morf4l1    | MORFRG15   |
| chr7  | 1.24E+08 | 1.24E+08 | intron (NM  | CpG        | 171    | NM_01108 | 18704  | Pik3c2a    | Cpk-m PI3  |
| chr1  | 79311277 | 79311575 | Intergenic  | Intergenic | 125239 | NM_00912 | 20254  | Scg2       | Chgc SgII  |
| chr10 | 79167252 | 79167950 | intron (NM  | intron (NM | 498    | NM_00976 | 12215  | Bsg        | AI115436 , |
| chr7  | 71041677 | 71042000 | intron (NM  | CpG        | -19905 | NM_00125 | 381994 | E030018B1  | Gm1697     |
| chr3  | 53266977 | 53267200 | promoter-1  | promoter-1 | 92     | NM_17250 | 212114 | Nhlrc3     | 4833441N1  |
| chr19 | 7048952  | 7049125  | promoter-1  | promoter-1 | -500   | NM_00888 | 18938  | Ppp1r14b   | AOM172 F   |
| chr12 | 92629727 | 92629925 | intron (NR_ | L1MEc LIN  | -6977  | NM_18181 | 75216  | Cep128     | 4930534BC  |
| chr10 | 1.28E+08 | 1.28E+08 | intron (NM  | CpG        | 264    | NM_01111 | 18813  | Pa2g4      | 38kDa AA6  |
| chr9  | 1.05E+08 | 1.05E+08 | intron (NM  | intron (NM | 12786  | NM_00125 | 235574 | Atp2c1     | 1700121J1  |
| chr7  | 38804002 | 38804200 | intron (NM  | CpG        | 470    | NM_01127 | 19777  | Uri1       | C80913 NM  |
| chr9  | 66019452 | 66019550 | intron (NM  | intron (NM | 13468  | NM_01001 | 13143  | Dapk2      | -          |
| chr7  | 35006752 | 35006875 | intron (NM  | intron (NM | 8542   | NM_00815 | 14751  | Gpi1       | Amf Gpi G  |
| chr3  | 1.16E+08 | 1.16E+08 | Intergenic  | Intergenic | -12863 | NM_00117 | 229776 | Cdc14a     | A830059A1  |
| chr13 | 28509527 | 28509650 | Intergenic  | Intergenic | 275235 | NM_02374 | 28078  | Pr15a1     | 1600013PC  |
| chr19 | 42007402 | 42007575 | promoter-1  | promoter-1 | 316    | NM_00116 | 66583  | Exosc1     | 2610035C1  |
| chr1  | 54867027 | 54867125 | intron (NM  | intron (NM | 116155 | NM_00108 | 329154 | Ankrd44    | 4930444A1  |
| chr9  | 44321352 | 44321425 | exon (NM_   | exon (NM_  | 13116  | NM_00755 | 12145  | Cxcr5      | Blr1 CXC-R |
| chr1  | 16655152 | 16655475 | promoter-1  | promoter-1 | 41     | NM_02639 | 70397  | Tmem70     | 1110020AC  |
| chr16 | 84836152 | 84836300 | promoter-1  | promoter-1 | -407   | NM_01675 | 11957  | Atp5j      | -          |
| chr1  | 72759452 | 72759550 | intron (NM  | intron (NM | 1667   | NM_00908 | 19981  | Rpl37a     | -          |
| chr2  | 81893502 | 81893625 | promoter-1  | promoter-1 | -252   | NM_17551 | 241514 | Zfp804a    | C630007C1  |
| chr7  | 75130052 | 75130500 | intron (NM  | intron (NM | 33133  | NM_01051 | 16001  | Igf1r      | A330103N;  |
| chr14 | 28669327 | 28669500 | intron (NM  | intron (NM | 233785 | NM_17781 | 238988 | Erc2       | 6430531DC  |
| chr7  | 1.34E+08 | 1.34E+08 | promoter-1  | promoter-1 | 57     | NM_00116 | 233870 | Tufm       | 2300002GC  |
| chr1  | 1.01E+08 | 1.01E+08 | Intergenic  | Intergenic | 300062 | NM_02758 | 70866  | Slco6d1    | 492151110! |
| chr16 | 16565977 | 16566150 | Intergenic  | MTD LTR    | -5774  | NM_13923 | 224014 | Fgd4       | 9030023J0  |
| chr13 | 56236177 | 56236275 | intron (NM  | CpG        | 685    | NM_01201 | 26914  | H2afy      | H2AF12M    |
| chr12 | 1.07E+08 | 1.07E+08 | Intergenic  | Intergenic | -23456 | NM_00974 | 12062  | Bdkrb2     | B(2) B2 B2 |
| chr8  | 58550052 | 58550150 | intron (NM  | intron (NM | 130479 | NM_08043 | 110304 | Gira3      | -          |
| chr4  | 1.17E+08 | 1.17E+08 | intron (NM  | intron (NM | 22250  | NM_00111 | 108067 | Eif2b3     | 1190002P1  |
| chr16 | 38679177 | 38679250 | intron (NM  | intron (NM | 33935  | NM_02026 | 12549  | Arhgap31   | 5830477L0  |
| chr15 | 97173377 | 97173625 | intron (NM  | MTD LTR    | -95783 | NM_00116 | 105827 | Amigo2     | AI415330 , |
| chr14 | 73657152 | 73657275 | intron (NM  | intron (NM | 19515  | NM_17511 | 67168  | Lpar6      | 261030210: |



|       |          |          |                       |         |          |        |           |            |
|-------|----------|----------|-----------------------|---------|----------|--------|-----------|------------|
| chr17 | 71335277 | 71335350 | intron (NMB1_Mur3 S   | 4543    | NM_02340 | 67938  | Myl12b    | 1500001M   |
| chr8  | 1.29E+08 | 1.29E+08 | Intergenic Intergenic | 93733   | NM_02421 | 67952  | Tomm20    | 1810060KC  |
| chr10 | 61912352 | 61912625 | promoter-1promoter-1  | -47     | NM_18142 | 338359 | Supv3l1   | 6330443E1  |
| chr12 | 81891577 | 81891725 | 5' UTR (NM 5' UTR (NM | 132     | NM_00124 | 217684 | 4933426M  | mKIAA024:  |
| chr1  | 72466902 | 72467150 | Intergenic MLT1K LTF  | 113031  | NM_00953 | 22596  | Xrcc5     | AI314015   |
| chr1  | 10251477 | 10251925 | Intergenic Intergenic | -28950  | NM_00110 | 211673 | Arfgef1   | ARFGEP1 E  |
| chr10 | 19524502 | 19524775 | Intergenic Intergenic | 46627   | NM_02952 | 76157  | Slc35d3   | 6230421J1' |
| chr1  | 1.36E+08 | 1.36E+08 | promoter-1promoter-1  | -387    | NM_02058 | 57439  | Tmem183a  | 1300007B1  |
| chr2  | 34999377 | 34999475 | intron (NM intron (NM | 11672   | NM_00129 | 26920  | Cntrl     | 6720467OC  |
| chr1  | 1.54E+08 | 1.54E+08 | intron (NML1M3 LINE   | 131737  | NM_19799 | 69399  | 1700025GC | 2610510E0  |
| chr11 | 1.14E+08 | 1.14E+08 | intron (NM CpG        | 558     | NM_01358 | 16834  | Cog1      | 603044511! |
| chr3  | 1.08E+08 | 1.08E+08 | intron (NM intron (NM | 3503    | NM_01035 | 14862  | Gstm1     | Gstb-1 Gst |
| chr9  | 44607177 | 44607450 | promoter-1promoter-1  | -14     | NM_02786 | 71687  | Tmem25    | 0610039J0  |
| chr14 | 45775352 | 45775700 | intron (NM MT2A LTR   | 63543   | NM_17259 | 70561  | Txndc16   | 5730420B2  |
| chr9  | 68891702 | 68892075 | intron (NM intron (NM | -245760 | NM_00128 | 19883  | Rora      | 9530021D1  |
| chr11 | 1.17E+08 | 1.17E+08 | intron (NM ID_B1 SINI | -15884  | NM_00111 | 53860  | 9-Sep     | MSF1 Msf   |
| chr1  | 39811327 | 39811525 | Intergenic Intergenic | -33592  | NM_00114 | 619289 | Rfx8      | 4933400N1  |
| chr10 | 90923402 | 90923575 | Intergenic Intergenic | -289124 | NM_00108 | 21917  | Tmpo      | 5630400D2  |
| chr7  | 29527127 | 29527200 | promoter-1promoter-1  | 176     | NM_02363 | 71984  | Sars2     | 2410015F0  |
| chr11 | 1.2E+08  | 1.2E+08  | intron (NM RLTR16 LT  | -17078  | NM_02798 | 71885  | 2310003HC | Faap100    |
| chr18 | 78033927 | 78034000 | intron (NM intron (NM | 674     | NM_01383 | 19201  | Pstpip2   | MAYP cmc   |
| chr17 | 35137077 | 35137200 | promoter-1promoter-1  | -714    | NM_01169 | 22321  | Vars      | Bat6 D17H  |
| chr8  | 1.23E+08 | 1.23E+08 | Intergenic Intergenic | 17906   | NM_00129 | 12857  | Cox4i1    | AL024441   |
| chr10 | 36694302 | 36694600 | 5' UTR (NM 5' UTR (NM | 101     | NM_00822 | 15182  | Hdac2     | D10Wsu17   |
| chr4  | 1.41E+08 | 1.41E+08 | exon (NM_exon (NM_    | 346     | NM_00101 | 68817  | Ddi2      | 1110056G1  |
| chr17 | 57096852 | 57096950 | intron (NM intron (NM | -22090  | NM_02232 | 64144  | Mllt1     | AA407901   |
| chr10 | 87970652 | 87971025 | Intergenic Intergenic | -4123   | NM_00114 | 212862 | Chpt1     | -          |
| chr9  | 61210927 | 61211300 | Intergenic L1MB2 LIN  | -9060   | NM_00108 | 21887  | Tle3      | 2610103NC  |
| chr4  | 95007627 | 95007975 | Intergenic Intergenic | -216397 | NM_00111 | 75578  | Fggy      | 2310009E0  |
| chr1  | 1.59E+08 | 1.59E+08 | intron (NM intron (NM | 17542   | NM_00115 | 78255  | Ralgps2   | 1810020P1  |
| chr8  | 1.28E+08 | 1.28E+08 | intron (NM intron (NM | 42785   | NM_02563 | 66566  | Ntpcr     | 2310079NC  |
| chr7  | 35826352 | 35826575 | intron (NM intron (NM | 15122   | NM_00988 | 12611  | Cebpg     | C/EBP[g] C |
| chr17 | 34067902 | 34068000 | intron (NM intron (NM | 1112    | NM_00905 | 19732  | Rgl2      | KE1.5 Rab: |
| chr1  | 1.09E+08 | 1.09E+08 | Intergenic Intergenic | -9137   | NM_00117 | 18788  | Serpib2   | PAI-2 Plan |
| chr14 | 57173527 | 57173850 | intron (NM PB1D7 SIN  | 16995   | NM_00101 | 219103 | Cenpj     | 4932437HC  |
| chr7  | 4676177  | 4676275  | intron (NM intron (NM | 458     | NM_00114 | 330460 | Tmem150k  | A630041N:  |
| chr5  | 1.37E+08 | 1.37E+08 | Intergenic Intergenic | -50753  | NM_02161 | 59310  | Myl10     | 170002710: |
| chr2  | 29744802 | 29745025 | promoter-1promoter-1  | -327    | NM_00117 | 18286  | Odf2      | AI848335   |
| chr1  | 1.93E+08 | 1.93E+08 | intron (NM intron (NM | 136411  | NM_17877 | 320119 | Rps6kc1   | AA682037   |
| chr1  | 66888502 | 66888725 | intron (NM intron (NM | 21270   | NM_00738 | 11363  | Acadl     | AA960361   |
| chr14 | 55331827 | 55332000 | promoter-1promoter-1  | -902    | NM_20713 | 110794 | Cebpe     | C/EBPe CR  |
| chr2  | 3458652  | 3458875  | Intergenic MIR SINE   | 28426   | NM_17764 | 227526 | Cdnf      | 9330140G2  |
| chr1  | 95374677 | 95374825 | promoter-1promoter-1  | 743     | NM_13380 | 110611 | Hdlbp     | 1110005P1  |
| chr14 | 27773752 | 27773975 | intron (NM intron (NM | 9874    | NM_14522 | 72993  | Appl1     | 2900057D2  |
| chr5  | 1.44E+08 | 1.44E+08 | intron (NM CpG        | 339     | NM_02584 | 66913  | Kdelr2    | 1110007A1  |
| chr7  | 19894677 | 19894800 | exon (NM_exon (NM_    | 656     | NM_00803 | 14282  | Fosb      | -          |
| chr15 | 1.02E+08 | 1.02E+08 | intron (NM intron (NM | 628     | NM_00931 | 21357  | Tarbp2    | Prbp TRBP  |

|       |          |          |             |             |         |          |        |           |            |
|-------|----------|----------|-------------|-------------|---------|----------|--------|-----------|------------|
| chr1  | 1.58E+08 | 1.58E+08 | intron (NM  | intron (NM  | 3058    | NM_00923 | 20652  | Soat1     | 8430426K1  |
| chr3  | 88139702 | 88139875 | promoter-1  | promoter-1  | -394    | NM_17824 | 229512 | Smg5      | BC024683   |
| chr1  | 59741852 | 59742050 | 5' UTR (NM  | 5' UTR (NM  | 101     | NM_01886 | 55989  | Nop58     | MSSP NoE   |
| chr4  | 46384277 | 46384350 | Intergenic  | Intergenic  | 17982   | NM_02908 | 74753  | 5830415F0 | AV014846   |
| chr19 | 10630552 | 10630925 | promoter-1  | promoter-1  | -10     | NM_02679 | 68642  | Tmem216   | 1110017C2  |
| chr1  | 1.82E+08 | 1.82E+08 | intron (NM  | intron (NM  | 720     | NM_00741 | 11545  | Parp1     | 5830444G2  |
| chr14 | 21474177 | 21474350 | intron (NM  | intron (NM  | 1499    | NM_02150 | 59011  | Myoz1     | 2310001N1  |
| chr9  | 32327727 | 32328150 | intron (NM  | intron (NM  | 21099   | NM_00802 | 14247  | Fli1      | EWSR2 Fli- |
| chr17 | 8109952  | 8110225  | Intergenic  | MLT1H LTI   | -8777   | NM_14596 | 72536  | Tagap     | 2610315E1  |
| chr13 | 9912827  | 9913200  | intron (NM  | intron (NM  | -148453 | NM_14451 | 66505  | Zmynd11   | 2210402G2  |
| chr2  | 21435427 | 21435725 | intron (NM  | intron (NM  | 146382  | NM_00100 | 241263 | Gpr158    | 5330427M   |
| chr18 | 46905652 | 46905725 | intron (NM  | intron (NM  | 4117    | NM_00968 | 11777  | Ap3s1     | [s]3A      |
| chr10 | 93296627 | 93296875 | intron (NM  | CpG         | 2451    | NM_00120 | 327799 | Usp44     | E430004F1  |
| chr11 | 72420952 | 72421025 | 5' UTR (NM  | 5' UTR (NM  | 225     | NM_02598 | 67128  | Ube2g1    | 2700059C1  |
| chr12 | 73769002 | 73769175 | Intergenic  | Intergenic  | -3273   | NM_02552 | 66375  | Dhrs7     | 2310016E2  |
| chr11 | 1.18E+08 | 1.18E+08 | Intergenic  | Intergenic  | 5592    | NM_00770 | 12702  | Socs3     | Cis3 Cish3 |
| chr1  | 37401177 | 37401750 | intron (NM  | intron (NM  | -24599  | NM_00129 | 269180 | Inpp4a    | 107kDa 96  |
| chr11 | 53243702 | 53243875 | intron (NM  | intron (NM  | 545     | NM_02535 | 22272  | Uqcrq     | 1100001F0  |
| chr4  | 1.41E+08 | 1.41E+08 | intron (NM  | MTEa LTR    | 5583    | NM_00101 | 68817  | Ddi2      | 1110056G1  |
| chr11 | 11630352 | 11630625 | intron (NM  | intron (NM  | 44272   | NM_00102 | 22778  | Ikzf1     | 5832432G1  |
| chr5  | 16156077 | 16156375 | Intergenic  | Intergenic  | 96507   | NM_00128 | 15234  | Hgf       | C230052L0  |
| chr3  | 95477777 | 95477850 | Intergenic  | Intergenic  | 13968   | NM_14489 | 229595 | Adamts14  | Tsrc1      |
| chr15 | 94373502 | 94373750 | promoter-1  | promoter-1  | 312     | NM_17243 | 78895  | Pus7l     | 3000003F0  |
| chr7  | 1.21E+08 | 1.21E+08 | intron (NM  | intron (NM  | 90189   | NM_14558 | 233744 | Spon1     | AI666765 , |
| chr15 | 59479977 | 59480050 | promoter-1  | promoter-1  | -196    | NM_14454 | 211770 | Trib1     | A5300900:  |
| chr1  | 63223277 | 63223675 | promoter-1  | promoter-1  | 71      | NM_01879 | 55949  | Eef1b2    | 2810017J0' |
| chr13 | 37748852 | 37748975 | Intergenic  | MER58B D    | -168994 | NM_02683 | 68750  | Rreb1     | 1110037N0  |
| chr11 | 1.01E+08 | 1.01E+08 | intron (NM  | intron (NM  | 1149    | NM_21366 | 20848  | Stat3     | 1110034CC  |
| chr11 | 77305252 | 77305350 | Intergenic  | CpG         | -1613   | NM_00100 | 216963 | Git1      | Cat-1 p95C |
| chr10 | 95097477 | 95097600 | Intergenic  | Intergenic  | -70737  | NM_02772 | 71207  | Nudt4     | 4933436C1  |
| chr7  | 1.1E+08  | 1.1E+08  | 5' UTR (NM  | 5' UTR (NM  | 192     | NM_00910 | 20133  | Rrm1      | RnrM1      |
| chr15 | 73491452 | 73491650 | Intergenic  | Intergenic  | -36377  | NM_00103 | 106068 | Slc45a4   | 9330175BC  |
| chr1  | 43870952 | 43871275 | intron (NM  | intron (NM  | 13440   | NM_02643 | 67883  | Uxs1      | 160002511: |
| chr10 | 87819852 | 87819975 | promoter-1  | promoter-1  | -93     | NM_02787 | 71712  | Dram1     | 1200002N1  |
| chr10 | 40602127 | 40602275 | intron (NM  | intron (NM  | 748     | NM_02787 | 71713  | Cdc40     | 1200003H2  |
| chr11 | 78959502 | 78959625 | exon (NM_   | exon (NM_   | 293     | NM_01357 | 16706  | Ksr1      | AW492498   |
| chr1  | 66749327 | 66749425 | intron (NM  | intron (NM  | 1909    | NM_02568 | 66646  | Rpe       | 2810429BC  |
| chr5  | 1.4E+08  | 1.4E+08  | intron (NM  | CpG         | 211     | NM_01075 | 17135  | Mafk      | AW061068   |
| chr18 | 35091952 | 35092025 | promoter-1  | promoter-1  | -331    | NM_14486 | 225363 | Etf1      | AI463371   |
| chr19 | 12519477 | 12519875 | Intergenic  | Lx9 LINE L  | -15593  | NM_01082 | 17476  | Mpeg1     | MPS1 Mpeg  |
| chr11 | 61307177 | 61307350 | exon (NM_   | exon (NM_   | 505     | NM_00129 | 23939  | Mapk7     | BMK-1 BM   |
| chr1  | 1.73E+08 | 1.73E+08 | promoter-1  | promoter-1  | -696    | NM_01948 | 56009  | Alyref2   | C130042O:  |
| chr18 | 55006077 | 55006500 | Intergenic  | Intergenic  | 143546  | NM_17575 | 269023 | Zfp608    | 4932417D1  |
| chr15 | 76734127 | 76735900 | exon (NM_   | exon (NM_   | 512     | NM_01205 | 26961  | Rpl8      | -          |
| chr8  | 1.14E+08 | 1.14E+08 | promoter-1  | promoter-1  | 94      | NM_17228 | 234733 | Ddx19b    | 2810457M   |
| chr8  | 1.13E+08 | 1.13E+08 | Intergenic  | RMER19B     | -8539   | NM_00917 | 20444  | St3gal2   | AI429591 , |
| chr15 | 99090052 | 99090275 | intron (NR_ | intron (NR_ | -7771   | NM_01676 | 51812  | Mcrs1     | C78274 ICI |

|       |          |          |            |            |         |          |        |           |            |
|-------|----------|----------|------------|------------|---------|----------|--------|-----------|------------|
| chr2  | 1.74E+08 | 1.74E+08 | intron (NM | intron (NM | 2755    | NM_02232 | 64138  | Ctsz      | AI787083   |
| chr2  | 1.53E+08 | 1.53E+08 | Intergenic | Intergenic | 7168    | NM_01022 | 14239  | Foxs1     | FREAC10 F  |
| chr2  | 1.35E+08 | 1.35E+08 | Intergenic | B3 SINE B  | -48169  | NM_02914 | 52837  | Tmx4      | 2810417DC  |
| chr3  | 1.44E+08 | 1.44E+08 | Intergenic | Intergenic | 63395   | NM_00116 | 16911  | Lmo4      | A730077C1  |
| chr6  | 1.07E+08 | 1.07E+08 | promoter-1 | promoter-1 | 31      | NM_00124 | 70047  | Trnt1     | 2410043H2  |
| chr2  | 1.7E+08  | 1.7E+08  | Intergenic | MLT2B3 L1  | -21576  | NM_00115 | 228913 | Zfp217    | 4933431CC  |
| chr2  | 1.7E+08  | 1.7E+08  | Intergenic | Intergenic | -76576  | NM_00115 | 228913 | Zfp217    | 4933431CC  |
| chr17 | 23729752 | 23729850 | intron (NM | CpG        | 6653    | NM_01174 | 22654  | Zfp13     | 4933429B2  |
| chr2  | 33726552 | 33727075 | intron (NM | intron (NM | 16653   | NM_17518 | 72543  | Mvb12b    | 261020001  |
| chr5  | 1.18E+08 | 1.18E+08 | intron (NM | intron (NM | 15519   | NM_02812 | 72151  | Rfc5      | 2610020KC  |
| chr14 | 31237777 | 31237850 | intron (NM | intron (NM | -54938  | NM_13376 | 75901  | Dcp1a     | 1110066A2  |
| chr13 | 3895052  | 3895250  | intron (NM | intron (NM | -2324   | NM_00104 | 56349  | Net1      | Net1a mN   |
| chr7  | 1.06E+08 | 1.06E+08 | Intergenic | CpG        | -19759  | NM_00128 | 22411  | Wnt11     | -          |
| chr1  | 13363102 | 13363325 | intron (NM | CpG        | 951     | NM_00107 | 17978  | Ncoa2     | 9530095N1  |
| chr14 | 79850377 | 79850450 | Intergenic | RMER12 L'  | -1229   | NM_00103 | 432879 | Zbtbd6    | EG432879   |
| chr7  | 1.35E+08 | 1.35E+08 | promoter-1 | promoter-1 | -51     | NM_14625 | 244219 | Zfp668    | BC030314   |
| chr5  | 53060577 | 53060825 | intron (NM | CpG        | 239     | NM_17249 | 211006 | Sepsecs   | 9130208G1  |
| chr16 | 36183952 | 36184200 | promoter-1 | promoter-1 | -222    | NM_00108 | 433016 | Gm5483    | EG433016   |
| chrX  | 1.31E+08 | 1.31E+08 | intron (NM | intron (NM | 19428   | NM_01348 | 12229  | Btk       | AI528679 : |
| chr17 | 47398027 | 47398275 | intron (NM | intron (NM | 30972   | NM_17262 | 224829 | Trerf1    | 943009611: |
| chr17 | 57419852 | 57419925 | intron (NM | intron (NM | 1365    | NM_00116 | 22324  | Vav1      | Vav vav-T  |
| chr9  | 90128377 | 90128500 | intron (NM | intron (NM | 37169   | NM_19433 | 67016  | Tbc1d2b   | 1810061M   |
| chr8  | 1.25E+08 | 1.25E+08 | Intergenic | Intergenic | -2759   | NM_01391 | 30927  | Snai3     | AI643946 : |
| chr5  | 64525227 | 64525425 | Intergenic | Intergenic | -26173  | NM_01963 | 57915  | Tbc1d1    | 1110062GC  |
| chr12 | 58604077 | 58604375 | Intergenic | L1_Rod LIN | 42882   | NM_00825 | 15375  | Foxa1     | Hnf-3a Hnf |
| chr6  | 50495352 | 50495900 | Intergenic | Intergenic | 20847   | NM_00780 | 13063  | Cyca      | -          |
| chr5  | 44537752 | 44537925 | Intergenic | L1MB5 LIN  | -44863  | NM_00116 | 19126  | Prom1     | 4932416E1  |
| chrX  | 33575627 | 33575750 | intron (NM | L1MB7 LIN  | -76446  | NM_13399 | 16164  | Il13ra1   | AI882074 : |
| chr17 | 47731352 | 47731425 | intron (NM | intron (NM | 972     | NM_00763 | 12445  | Ccnd3     | 9230106BC  |
| chr14 | 51708827 | 51708900 | Intergenic | Intergenic | -1889   | NM_00116 | 11727  | Ang       | AI385586 : |
| chr13 | 56804527 | 56804875 | promoter-1 | promoter-1 | 288     | NM_00116 | 17129  | Smad5     | 1110051M   |
| chr12 | 41750777 | 41750975 | intron (NM | CpG        | 199     | NM_05312 | 93757  | Immp2l    | AI853880 : |
| chr11 | 1.15E+08 | 1.15E+08 | promoter-1 | promoter-1 | 223     | NM_02530 | 50529  | Mrps7     | MRP-S7 Rq  |
| chr7  | 52972902 | 52974825 | promoter-1 | promoter-1 | 422     | NM_00907 | 19899  | Rpl18     | L18 Rpl18: |
| chr19 | 45005677 | 45005875 | 5' UTR (NV | 5' UTR (NV | 167     | NM_00108 | 226151 | Fam178a   | 3632432H1  |
| chr17 | 36033752 | 36034100 | TTS (NM_0  | TTS (NM_0  | 397     | NM_00103 | 69662  | 231006110 | -          |
| chr7  | 14606602 | 14606850 | Intergenic | RLTR45 LT  | -31789  | NM_00110 | 434121 | Sult2a4   | EG434121   |
| chr9  | 1.07E+08 | 1.07E+08 | 5' UTR (NV | 5' UTR (NV | 525     | NM_01970 | 56395  | Tmem115   | C78915 PI  |
| chr6  | 1.3E+08  | 1.3E+08  | Intergenic | Intergenic | -48171  | NM_00101 | 232415 | Gm156     | Klrh1      |
| chr11 | 1.11E+08 | 1.11E+08 | Intergenic | Intergenic | -265759 | NM_01060 | 16517  | Kcnj16    | 6430410F1  |
| chr11 | 1.07E+08 | 1.07E+08 | intron (NM | intron (NM | 29223   | NM_17685 | 207165 | Bptf      | 9430093H1  |
| chr4  | 49689727 | 49689925 | intron (NM | intron (NM | 5029    | NM_00100 | 19059  | Ppp3r2    | CaNB2      |
| chr11 | 84693677 | 84693850 | promoter-1 | promoter-1 | 24      | NM_00107 | 70325  | Pigw      | 2610044A1  |
| chr8  | 93594002 | 93594125 | 5' UTR (NV | 5' UTR (NV | 107     | NM_00128 | 19651  | Rbl2      | PRB2 RBR-  |
| chr7  | 1.33E+08 | 1.33E+08 | promoter-1 | promoter-1 | 426     | NM_20723 | 233863 | Gtf3c1    | -          |
| chr6  | 90272127 | 90272225 | intron (NM | intron (NM | 3003    | NM_02792 | 71797  | Chst13    | 1110067M   |
| chr2  | 1.44E+08 | 1.44E+08 | intron (NM | L1MB7 LIN  | 21171   | NM_01977 | 56431  | Dstn      | 2610043P1  |

|       |          |          |                       |        |          |        |           |             |
|-------|----------|----------|-----------------------|--------|----------|--------|-----------|-------------|
| chr2  | 1.3E+08  | 1.3E+08  | non-coding non-coding | 360    | NM_00103 | 67333  | Stk35     | 1700054C1   |
| chr1  | 1.72E+08 | 1.72E+08 | intron (NM intron (NM | 45024  | NM_02256 | 18214  | Ddr2      | AW495251    |
| chr6  | 52692327 | 52692500 | intron (NM intron (NM | 28690  | NM_02581 | 52440  | Tax1bp1   | 1200003J1   |
| chr3  | 87733877 | 87734000 | promoter-1promoter-1  | 179    | NM_15356 | 229503 | Rrnad1    | -           |
| chr8  | 1.09E+08 | 1.09E+08 | intron (NM intron (NM | -9590  | NM_01090 | 18021  | Nfatc3    | C80703 D8   |
| chr4  | 40103202 | 40103575 | intron (NM intron (NM | 13090  | NM_00738 | 11428  | Aco1      | Aco-1 Ireb  |
| chr1  | 1.35E+08 | 1.35E+08 | Intergenic CpG        | 32858  | NM_13381 | 108954 | Ppp1r15b  | 1810033K1   |
| chr9  | 1.15E+08 | 1.15E+08 | Intergenic RCHARR1 I  | -6862  | NM_02422 | 68292  | Stt3b     | 1300006C1   |
| chr11 | 57332052 | 57332125 | promoter-1promoter-1  | 58     | NM_00116 | 67726  | Fam114a2  | 1810073G1   |
| chr1  | 1.58E+08 | 1.58E+08 | 5' UTR (NM 5' UTR (NM | 197    | NM_14479 | 208263 | Tor1aip1  | LAP1 Lap1   |
| chr4  | 43455752 | 43456175 | 5' UTR (NM 5' UTR (NM | 814    | NM_01157 | 21754  | Tesk1     | AI326901    |
| chr3  | 35645452 | 35645700 | Intergenic Intergenic | -7484  | NM_02957 | 76295  | Atp11b    | 111001914   |
| chr19 | 34979952 | 34980025 | Intergenic Intergenic | -16860 | NM_18304 | 240641 | Kif20b    | 33cex B13   |
| chr10 | 87799227 | 87799375 | intron (NM MER31A L   | 20519  | NM_02787 | 71712  | Dram1     | 1200002N1   |
| chr13 | 76718627 | 76718900 | intron (NM intron (NM | 196354 | NM_03017 | 78771  | Mctp1     | 2810465F1   |
| chr4  | 1.35E+08 | 1.35E+08 | intron (NM intron (NM | 14386  | NM_03018 | 78806  | Stpg1     | 4930403G1   |
| chr7  | 1.09E+08 | 1.09E+08 | intron (NM intron (NM | 431    | NM_01053 | 16068  | Il18bp    | IL-18BP Igi |
| chr8  | 1.29E+08 | 1.29E+08 | Intergenic Intergenic | -67877 | NM_00116 | 270110 | Irf2bp2   | E130305N2   |
| chr4  | 8839927  | 8840000  | Intergenic Intergenic | 222410 | NM_00127 | 320790 | Chd7      | A73001910   |
| chr1  | 1.93E+08 | 1.93E+08 | Intergenic CpG        | 27545  | NM_03006 | 381319 | Batf3     | 913021110:  |
| chr18 | 61336052 | 61336250 | intron (NM intron (NM | 552    | NM_17827 | 106894 | Hmgxb3    | 2510002C1   |
| chr11 | 94580027 | 94580100 | Intergenic Intergenic | -14250 | NM_00100 | 432589 | Gm11541   | OTTMUSG0    |
| chr10 | 84379677 | 84379800 | promoter-1promoter-1  | -620   | NM_00101 | 237422 | Ric8b     | BC051080    |
| chr3  | 40548827 | 40548925 | promoter-1promoter-1  | -659   | NM_01102 | 18415  | Hspa4l    | 94kDa A4    |
| chr7  | 1.48E+08 | 1.48E+08 | Intergenic MTC LTR I  | -5447  | NM_00103 | 213002 | Ifitm6    | A330075D0   |
| chr19 | 47845027 | 47845125 | intron (NM intron (NM | 38830  | NM_02637 | 67788  | Sfr1      | 6330577E1   |
| chr17 | 36006952 | 36007025 | intron (NM intron (NM | 3428   | NM_17524 | 76448  | Ppp1r18   | 2310014HC   |
| chr1  | 93294602 | 93294825 | intron (NM CpG        | 647    | NM_02334 | 67444  | Ilkap     | 0710007A1   |
| chr6  | 1.49E+08 | 1.49E+08 | 5' UTR (NM 5' UTR (NM | 265    | NM_00128 | 67246  | 28104740: | 672043512:  |
| chr13 | 98913052 | 98913200 | intron (NM intron (NM | 62994  | NM_01202 | 110596 | Arhgef28  | 9230110L0   |
| chr19 | 10364702 | 10364850 | intron (NM intron (NM | 14591  | NM_19811 | 269060 | Dagla     | Nsddr       |
| chr4  | 82504927 | 82505000 | intron (NM intron (NM | 602    | NM_02664 | 68268  | Zdhhc21   | 9130404H1   |
| chr2  | 1.21E+08 | 1.21E+08 | promoter-1promoter-1  | -323   | NM_02689 | 68968  | Cdan1     | 1500015AC   |
| chr1  | 39559627 | 39559750 | Intergenic Intergenic | -24096 | NM_01877 | 54610  | Tbc1d8    | AD3 HBLP:   |
| chr3  | 51013477 | 51014000 | Intergenic L1MD1 LIN  | -14631 | NM_00983 | 12457  | Ccrn4l    | AU043840    |
| chr14 | 49066102 | 49066300 | exon (NM_ exon (NM_   | 174    | NM_17260 | 218989 | Tmem260   | 5930435P1   |
| chr9  | 1.09E+08 | 1.09E+08 | Intergenic L1MB4 LIN  | -10573 | NM_02540 | 22273  | Uqcrc1    | 1110032G1   |
| chr5  | 1.46E+08 | 1.46E+08 | Intergenic Intergenic | -2361  | NM_00108 | 666311 | Zscan25   | EG666311    |
| chr13 | 59330477 | 59330675 | Intergenic MLT1A1 L1  | 315236 | NM_00128 | 67269  | Agtbbp1   | 1700020N1   |
| chr4  | 1.5E+08  | 1.5E+08  | intron (NM intron (NM | 13435  | NM_01974 | 56485  | Slc2a5    | AI526984 0  |
| chr12 | 1.19E+08 | 1.19E+08 | promoter-1promoter-1  | -371   | NM_14604 | 217946 | Cdca7l    | BC006933    |
| chr6  | 1E+08    | 1E+08    | Intergenic Intergenic | -54361 | NM_01974 | 56353  | Rybp      | 2410018J2:  |
| chr14 | 32497427 | 32497575 | Intergenic Intergenic | 43258  | NM_02529 | 26363  | Btd       | -           |
| chr2  | 1.03E+08 | 1.03E+08 | 5' UTR (NM 5' UTR (NM | 321    | NM_17889 | 99382  | Abtb2     | AW539457    |
| chr11 | 1.07E+08 | 1.07E+08 | intron (NM CpG        | 620    | NM_00784 | 13207  | Ddx5      | 2600009AC   |
| chr1  | 91350852 | 91350950 | promoter-1promoter-1  | -485   | NM_17811 | 347722 | Agap1     | Centg2 Gg   |
| chr4  | 1.51E+08 | 1.51E+08 | intron (NM CpG        | 565    | NM_02872 | 74035  | Nol9      | 463241212:  |

|       |          |          |                       |         |           |        |          |            |
|-------|----------|----------|-----------------------|---------|-----------|--------|----------|------------|
| chr12 | 66067527 | 66067625 | exon (NM_exon (NM_    | 847     | NM_17780  | 328108 | Fam179b  | A430041BC  |
| chr2  | 1.21E+08 | 1.21E+08 | intron (NML1MD3 LIN   | 3069    | NM_02879  | 74176  | Tgm5     | 2310007CC  |
| chr4  | 1.18E+08 | 1.18E+08 | promoter-1promoter-1  | -265    | NM_02322  | 107995 | Cdc20    | 2310042NC  |
| chr15 | 66934677 | 66934875 | 3' UTR (NV 3' UTR (NV | 73668   | NM_00917  | 20442  | St3gal1  | 5330418N2  |
| chr6  | 1.32E+08 | 1.32E+08 | promoter-1promoter-1  | -382    | NM_02050  | 57252  | Tas2r105 | T2R05 T2R  |
| chr4  | 1.3E+08  | 1.3E+08  | intron (NM CpG        | 227     | NM_00115  | 80912  | Pum1     | AA517475   |
| chr4  | 47961677 | 47961975 | Intergenic Intergenic | -102294 | NM_01574  | 18124  | Nr4a3    | AI573420   |
| chr18 | 4375577  | 4375950  | exon (NM_exon (NM_    | 173     | NM_02615  | 67440  | Mtpap    | 0610027A1  |
| chr13 | 97717652 | 97717775 | 3' UTR (NV 3' UTR (NV | 23069   | NM_00116  | 218476 | Gcnt4    | C2gnt3 Gr  |
| chr6  | 67483252 | 67483325 | TTS (NM_0 TTS (NM_0   | 2528    | NM_02004  | 56753  | Tacstd2  | C80403 EC  |
| chr5  | 51812202 | 51812350 | Intergenic Intergenic | 132884  | NR_02771( | 19017  | Ppargc1a | A830037NC  |
| chr15 | 36324777 | 36325000 | Intergenic Intergenic | 101658  | NM_17513  | 68839  | Ankrd46  | 1110054NC  |
| chr5  | 67795752 | 67796200 | intron (NM intron (NM | 23062   | NM_00116  | 666938 | Bend4    | D330027G:  |
| chr11 | 20149527 | 20149725 | promoter-1promoter-1  | -199    | NM_17226  | 216543 | Cep68    | 6030463E1  |
| chr16 | 33966352 | 33966575 | intron (NM intron (NM | 626     | NM_00947  | 22247  | Umps     | 1700095D2  |
| chr3  | 86816552 | 86816650 | Intergenic RLTR13C1   | -13339  | NM_00763  | 12479  | Cd1d1    | AI747460   |
| chr10 | 21096452 | 21096575 | promoter-1promoter-1  | -593    | NM_17871  | 237320 | Aldh8a1  | Raldh4     |
| chr9  | 1.22E+08 | 1.22E+08 | Intergenic B1F SINE , | -2066   | NM_17867  | 215474 | Sec22c   | 4932412K2  |
| chr10 | 57961027 | 57961250 | intron (NM intron (NM | 453     | NM_00116  | 76138  | Ccdc138  | 6230424HC  |
| chr9  | 1.1E+08  | 1.1E+08  | promoter-1promoter-1  | -143    | NM_00992  | 12796  | Camp     | CAP18 Cnl  |
| chr3  | 14138477 | 14138550 | intron (NM intron (NM | 192141  | NM_00116  | 76897  | Raly1    | 0710005M   |
| chr7  | 1.03E+08 | 1.03E+08 | intron (NM intron (NM | 2379    | NM_01185  | 23966  | Tenm4    | Doc4 ELM:  |
| chr10 | 53141477 | 53141600 | Intergenic Intergenic | -41881  | NM_00120  | 1E+08  | Cep85l   | ENSMUSGC   |
| chr15 | 79914077 | 79914150 | promoter-1promoter-1  | -277    | NM_01376  | 27367  | Rpl3     | F2 J1      |
| chr6  | 1.36E+08 | 1.36E+08 | Intergenic MLT1L LTR  | -43484  | NM_01942  | 54343  | Atf7ip   | 2610204M   |
| chr5  | 92934302 | 92934375 | 5' UTR (NV 5' UTR (NV | 296     | NM_00764  | 12492  | Scarb2   | 9330185J1  |
| chr16 | 16303477 | 16303575 | non-coding non-coding | 468     | NM_19824  | 70120  | Yars2    | 2210023C1  |
| chr14 | 69902177 | 69902300 | intron (NM intron (NM | 922     | NM_02633  | 67712  | Slc25a37 | 1700020E2  |
| chr13 | 88599127 | 88599500 | Intergenic Zaphod DN  | -361764 | NM_01010  | 13612  | Edil3    | Del-1 Del1 |
| chr14 | 56386402 | 56386525 | exon (NM_exon (NM_    | 1664    | NM_00851  | 16995  | Ltb4r1   | BLT1 BLTR  |
| chr3  | 85945377 | 85947025 | intron (NM CpG        | 389     | NM_01695  | 20091  | Rps3a1   | Rps3a      |
| chr9  | 44795127 | 44795200 | TTS (NM_0 TTS (NM_0   | 5294    | NM_01348  | 12500  | Cd3d     | T3d        |
| chr6  | 1.37E+08 | 1.37E+08 | 3' UTR (NV 3' UTR (NV | 1032    | NM_17768  | 232440 | H2afj    | E130307C1  |
| chr3  | 1E+08    | 1E+08    | intron (NM intron (NM | 66808   | NM_01076  | 17156  | Man1a2   | AI428775 , |
| chr6  | 1.18E+08 | 1.18E+08 | Intergenic Intergenic | -17982  | NM_00116  | 98758  | Hnrnpf   | 4833420I2( |
| chr14 | 55195852 | 55195925 | exon (NM_exon (NM_    | 610     | NM_01059  | 16475  | Ajuba    | Jub        |
| chr11 | 69572927 | 69573025 | promoter-1promoter-1  | -841    | NM_00129  | 20020  | Polr2a   | 220kDa Rp  |
| chr6  | 23673902 | 23674025 | intron (NM intron (NM | -68827  | NM_02775  | 71300  | Rnf148   | 4933432M   |
| chr5  | 1.22E+08 | 1.22E+08 | Intergenic Intergenic | -20530  | NM_00912  | 20239  | Atxn2    | 9630045M   |
| chr7  | 53171877 | 53172000 | exon (NM_exon (NM_    | 4281    | NM_00114  | 13732  | Emp3     | H-4 H4 HM  |
| chr1  | 1.97E+08 | 1.97E+08 | promoter-1promoter-1  | 51      | NM_01349  | 12946  | Cr1l     | Crry Mcp   |
| chr12 | 81164827 | 81165075 | Intergenic Intergenic | 49049   | NM_00756  | 12192  | Zfp36l1  | AW742437   |
| chr1  | 94033752 | 94034025 | intron (NM intron (NM | 11082   | NM_20722  | 208727 | Hdac4    | 4932408F1  |
| chr8  | 1.14E+08 | 1.14E+08 | promoter-1promoter-1  | -314    | NM_00116  | 170737 | Znrf1    | B830022L2  |
| chr7  | 52008152 | 52008300 | intron (NM intron (NM | 4227    | NM_13394  | 101568 | Vrk3     | AI428238   |
| chr12 | 74386552 | 74386625 | intron (NM intron (NM | 1110    | NM_02958  | 76357  | Trmt5    | 2610027O1  |
| chr4  | 1.06E+08 | 1.06E+08 | promoter-1promoter-1  | -92     | NM_18322  | 329908 | Usp24    | 2700066KC  |

|       |          |          |               |            |        |          |        |          |            |
|-------|----------|----------|---------------|------------|--------|----------|--------|----------|------------|
| chrX  | 1.21E+08 | 1.21E+08 | Intergenic    | Intergenic | 468943 | NM_00110 | 1E+08  | Vmn2r121 | EG625699   |
| chr1  | 36366577 | 36366675 | intron (NM    | intron (NM | 2048   | NM_00117 | 214855 | Arid5a   | D430024K2  |
| chr6  | 1.25E+08 | 1.25E+08 | promoter-1    | promoter-1 | -273   | NM_01370 | 22225  | Usp5     | AA407472   |
| chr3  | 60300952 | 60301025 | intron (NM    | intron (NM | -4186  | NM_00125 | 56758  | Mbnl1    | Mbnl mKI/  |
| chr2  | 92886127 | 92886550 | promoter-1    | promoter-1 | -37    | NM_00117 | 1E+08  | Prdm11   | 8030443DC  |
| chr13 | 5860127  | 5860200  | promoter-1    | promoter-1 | -572   | NM_01180 | 23849  | Klf6     | AI448727 I |
| chr2  | 1.31E+08 | 1.31E+08 | exon (NM_     | exon (NM_  | 315    | NM_15350 | 74450  | Pank2    | 49334091I  |
| chr7  | 1.33E+08 | 1.33E+08 | intron (NM    | intron (NM | 27651  | NM_20723 | 233863 | Gtf3c1   | -          |
| chr4  | 1.34E+08 | 1.34E+08 | Intergenic    | Intergenic | -3538  | NM_01370 | 23833  | Cd52     | AI463198 I |
| chr5  | 1.24E+08 | 1.24E+08 | Intergenic    | Intergenic | -17607 | NM_17787 | 330192 | Vps37b   | 2300007F2  |
| chr3  | 88355752 | 88355900 | intron (NMB1_ | Mus1 :     | 1023   | NM_03124 | 83409  | Lamtor2  | 2010111E0  |
| chr11 | 1.01E+08 | 1.01E+08 | intron (NM    | intron (NM | 2934   | NM_00115 | 21428  | Mlx      | Tcfl4 bHLH |
| chr15 | 73563027 | 73563225 | intron (NM    | intron (NM | 7766   | NM_00116 | 19245  | Ptp4a3   | AV088979   |
| chr11 | 31269452 | 31269575 | intron (NM    | CpG        | 548    | NM_01149 | 20856  | Stc2     | AW125853   |
| chr4  | 1.36E+08 | 1.36E+08 | 5' UTR (NM    | 5' UTR (NM | 129    | NM_17773 | 242705 | E2f2     | 9230110J1I |
| chr10 | 1.27E+08 | 1.27E+08 | promoter-1    | promoter-1 | 67     | NM_00892 | 19075  | Prim1    | AI324982   |
| chr1  | 1.3E+08  | 1.3E+08  | Intergenic    | Intergenic | -45083 | NM_14550 | 226414 | Dars     | 5730439G1  |
| chr17 | 48388402 | 48388475 | intron (NM    | intron (NM | 1542   | NM_02140 | 58218  | Trem3    | BB134760   |
| chr11 | 78901652 | 78901900 | intron (NM    | intron (NM | 58080  | NM_01357 | 16706  | Ksr1     | AW492498   |
| chr1  | 1.33E+08 | 1.33E+08 | Intergenic    | Intergenic | -1058  | NM_01875 | 54354  | Rassf5   | 1300019G2  |
| chr11 | 89933152 | 89933325 | Intergenic    | Intergenic | 41576  | NM_02643 | 67888  | Tmem100  | 1810057C1  |
| chr9  | 65430902 | 65431050 | Intergenic    | Intergenic | -3082  | NM_15311 | 102595 | Plekho2  | AI840980 I |
| chr16 | 17759377 | 17760475 | intron (NM    | CpG        | 212    | NM_14547 | 224023 | Klhl22   | 26103181I  |
| chr11 | 1.15E+08 | 1.15E+08 | intron (NM    | intron (NM | 1512   | NM_00103 | 320534 | Tmem104  | C630005DC  |
| chr12 | 1.1E+08  | 1.1E+08  | exon (NM_     | exon (NM_  | 655    | NM_00953 | 22632  | Yy1      | AW488674   |
| chr17 | 56442777 | 56443450 | promoter-1    | promoter-1 | 353    | NM_00111 | 18140  | Uhrf1    | AL022808   |
| chrX  | 96332252 | 96332325 | exon (NM_     | exon (NM_  | 819    | NM_01011 | 13641  | Efnb1    | Cek5-L EFL |
| chr17 | 81020077 | 81020525 | intron (NM    | (TG)n Sim  | -57127 | NM_00103 | 381113 | Cdkl4    | AU067824   |
| chr4  | 1.32E+08 | 1.32E+08 | Intergenic    | Intergenic | 27456  | NM_00108 | 19204  | Ptafr    | PAFR       |
| chr9  | 64188302 | 64189025 | promoter-1    | promoter-1 | -83    | NM_00117 | 213550 | Dis3l    | AV340375   |
| chr1  | 99745152 | 99745325 | intron (NM    | intron (NM | 78482  | NM_02625 | 252876 | Gin1     | 4930429M   |
| chr6  | 1.14E+08 | 1.14E+08 | exon (NM_     | exon (NM_  | -6592  | NM_00103 | 381801 | Tatdn2   | AI646012 I |
| chr4  | 57968127 | 57968275 | intron (NM    | intron (NM | 1082   | NM_01166 | 22166  | Txn1     | ADF AW55   |
| chr7  | 1.05E+08 | 1.05E+08 | promoter-1    | promoter-1 | -666   | NM_02367 | 12729  | Clns1a   | 2610036DC  |
| chr9  | 71761027 | 71761200 | intron (NM    | intron (NM | -17210 | NM_00125 | 21406  | Tcf12    | A130037EC  |
| chr4  | 1.33E+08 | 1.33E+08 | exon (NM_     | exon (NM_  | 675    | NM_00108 | 93760  | Arid1a   | 1110030E0  |
| chr6  | 97098652 | 97098950 | promoter-1    | promoter-1 | 76     | NM_17531 | 101351 | Eogt     | A130022J1  |
| chr15 | 81789252 | 81789525 | intron (NM    | intron (NM | 1972   | NM_00128 | 29858  | Pmm1     | C77612     |
| chr9  | 46080952 | 46081050 | promoter-1    | promoter-1 | -146   | NM_01175 | 22687  | Zpr1     | AI303781 : |
| chr7  | 1.06E+08 | 1.06E+08 | intron (NM    | intron (NM | 38561  | NM_00982 | 12406  | Serpinh1 | BERF-1 Cb  |
| chr3  | 1.33E+08 | 1.33E+08 | Intergenic    | Intergenic | -39434 | NM_00104 | 214133 | Tet2     | Ayu17-449  |
| chr10 | 1.15E+08 | 1.15E+08 | promoter-1    | promoter-1 | 273    | NM_00103 | 216345 | Zfc3h1   | BC033596   |
| chr13 | 45125302 | 45125400 | Intergenic    | L1M4 LINE  | -27886 | NM_02577 | 94245  | Dtnbp1   | 5430437B1  |
| chr16 | 58670402 | 58670550 | 5' UTR (NM    | 5' UTR (NM | 155    | NM_00775 | 12892  | Cpox     | CPX Cpo +  |
| chr3  | 95085852 | 95086000 | promoter-1    | promoter-1 | 72     | NM_17334 | 229589 | Prune    | 9230112OC  |
| chr16 | 49840102 | 49840400 | Intergenic    | Intergenic | -15516 | NM_01058 | 16423  | Cd47     | 9130415E2  |
| chr8  | 1.26E+08 | 1.26E+08 | promoter-1    | promoter-1 | 93     | NM_02049 | 57247  | Zfp276   | AW048709   |

|       |          |          |                       |         |           |        |            |              |
|-------|----------|----------|-----------------------|---------|-----------|--------|------------|--------------|
| chr19 | 6363952  | 6364125  | non-coding non-coding | 348     | NR_122118 | 22668  | Sf1        | BBP MZFM     |
| chr11 | 77306477 | 77306550 | promoter-promoter     | -401    | NM_00100  | 216963 | Git1       | Cat-1 p95C   |
| chr8  | 1.25E+08 | 1.25E+08 | intron (NM intron (NM | 2227    | NM_00130  | 13057  | Cyba       | b558 nmf3    |
| chrX  | 74754677 | 74754850 | Intergenic Intergenic | -1803   | NM_02060  | 21372  | Tbl1x      | 5330429M     |
| chr3  | 1.18E+08 | 1.18E+08 | intron (NM intron (NM | 641     | NM_00119  | 76561  | Snx7       | 2510028HC    |
| chr6  | 1.25E+08 | 1.25E+08 | intron (NML1M4 LINE   | -7378   | NM_01160  | 21937  | Tnfrsf1a   | CD120a FP    |
| chr1  | 1.79E+08 | 1.79E+08 | promoter-promoter     | -629    | NM_00101  | 30928  | Zbtb18     | RP58 Zfp2    |
| chr1  | 84932352 | 84932675 | promoter-promoter     | -855    | NM_02792  | 71781  | Slc16a14   | 1110004H1    |
| chr1  | 88339227 | 88339400 | Intergenic CpG        | 16409   | NM_02796  | 71863  | 17000190:- |              |
| chr14 | 31757552 | 31757800 | Intergenic Intergenic | -1201   | NM_00840  | 16424  | Itih1      | Intin1 Itih- |
| chr5  | 1.4E+08  | 1.4E+08  | intron (NM intron (NM | 1260    | NM_17700  | 319772 | C1300500:- |              |
| chr10 | 80847202 | 80847350 | 5' UTR (NV 5' UTR (NV | 103     | NM_13396  | 102115 | Dohh       | 1110033C1    |
| chr6  | 53639677 | 53640025 | intron (NM intron (NM | 116483  | NM_17272  | 231991 | Creb5      | Crebpa D4    |
| chr9  | 1.19E+08 | 1.19E+08 | Intergenic Intergenic | -13228  | NM_13371  | 69274  | Ctdspl     | 2810418J2    |
| chr9  | 72937402 | 72937750 | intron (NM intron (NM | -12629  | NM_02589  | 66991  | Khdc3      | 2410004A2    |
| chr6  | 64993477 | 64993625 | intron (NM intron (NM | 351     | NM_00125  | 13990  | Smarcad1   | AV081750     |
| chr1  | 26209027 | 26209250 | Intergenic L1_Mus2 L  | -322586 | NM_17564  | 210933 | Bai3       | A830096D:    |
| chr13 | 1.14E+08 | 1.14E+08 | Intergenic Intergenic | 28846   | NM_13079  | 170625 | Snx18      | Snag1        |
| chr13 | 3609127  | 3609350  | intron (NM intron (NM | 1116    | NM_13406  | 105203 | Fam208b    | AI645998 I   |
| chr12 | 1.02E+08 | 1.02E+08 | intron (NM intron (NM | 19356   | NM_00103  | 104718 | Ttc7b      | AA408451     |
| chrX  | 99383652 | 99385125 | promoter-promoter     | -678    | NM_00909  | 20102  | Rps4x      | Rps4 Rps4    |
| chr11 | 17853552 | 17853725 | exon (NM_exon (NM_    | 240     | NM_02657  | 68145  | Etaa1      | 5730466H2    |
| chr6  | 39675327 | 39675425 | promoter-promoter     | 86      | NM_13929  | 109880 | Braf       | 9930012E1    |
| chr2  | 23427377 | 23427475 | 5' UTR (NV 5' UTR (NV | 198     | NM_02977  | 76857  | Spopl      | 4921517NC    |
| chr5  | 20917627 | 20917775 | intron (NMLx3_Mus L   | 12794   | NM_02919  | 75172  | Ccdc146    | 4930528GC    |
| chr15 | 59484352 | 59484725 | intron (NM intron (NM | 4329    | NM_14454  | 211770 | Trib1      | A5300900:    |
| chr1  | 1.93E+08 | 1.93E+08 | intron (NM CpG        | 386     | NM_00749  | 11910  | Atf3       | LRG-21       |
| chr3  | 97798602 | 97799025 | Intergenic L2 LINE L2 | -18648  | NM_01092  | 18129  | Notch2     | AI853703 I   |
| chr1  | 1.66E+08 | 1.66E+08 | promoter-promoter     | 87      | NM_02727  | 69962  | Mettl18    | 2810422O2    |
| chr8  | 74882477 | 74882575 | intron (NM intron (NM | 39565   | NM_00845  | 16598  | Klf2       | Lklf         |
| chr8  | 28088827 | 28088925 | intron (NM CpG-13927  | 1068    | NM_00111  | 353310 | Zfp703     | 1110032O1    |
| chr3  | 41545977 | 41546075 | promoter-promoter     | 410     | NM_00108  | 67161  | Sc1t1      | 2610207F2    |
| chr17 | 79290302 | 79290500 | intron (NM intron (NM | -8489   | NM_01116  | 19106  | Eif2ak2    | 2310047AC    |
| chr1  | 92949227 | 92949325 | promoter-promoter     | -745    | NM_00111  | 16978  | Lrrfip1    | AU024550     |
| chr13 | 22134077 | 22134150 | promoter-promoter     | 705     | NM_17818  | 319167 | Hist1h2ag  | -            |
| chr10 | 85379302 | 85379400 | 5' UTR (NV 5' UTR (NV | 339     | NM_18165  | 72843  | Prdm4      | 1700031E1    |
| chr12 | 1.04E+08 | 1.04E+08 | intron (NM CpG        | 328     | NM_17280  | 238386 | Btbd7      | 5730507E0    |
| chr5  | 53915477 | 53915600 | Intergenic Intergenic | -31480  | NM_00108  | 19664  | Rbpj       | AI843960 I   |
| chr15 | 57967027 | 57967125 | promoter-promoter     | -439    | NM_02743  | 70472  | Atad2      | 2610509G1    |
| chr14 | 47441602 | 47441825 | intron (NM CpG        | 204     | NM_02202  | 63985  | Gmfb       | 3110001H2    |
| chr7  | 1.51E+08 | 1.51E+08 | Intergenic Intergenic | 9335    | NM_20349  | 381974 | Mrgprg     | Gm1098 N     |
| chr6  | 72390002 | 72390200 | promoter-promoter     | -549    | NM_14556  | 232087 | Mat2a      | D630045P1    |
| chr17 | 80606277 | 80606700 | intron (NM CpG        | 157     | NM_00119  | 225027 | Srsf7      | 35kDa 943    |
| chr15 | 91209477 | 91209600 | intron (NM intron (NM | -187300 | NM_01199  | 26874  | Abcd2      | ABC39 ALI    |
| chr7  | 30638552 | 30638625 | promoter-promoter     | 79      | NM_17373  | 233057 | Zfp940     | -            |
| chr6  | 30276127 | 30276225 | Intergenic (A)n Simpl | -21637  | NM_00116  | 22214  | Ube2h      | 1500009C2    |
| chr1  | 1.12E+08 | 1.12E+08 | Intergenic MT2A LTR   | 167187  | NM_17285  | 241201 | Cdh7       | 9330156F0    |

|       |          |          |            |            |        |           |          |            |            |
|-------|----------|----------|------------|------------|--------|-----------|----------|------------|------------|
| chr15 | 44451577 | 44451750 | intron (NM | intron (NM | 476    | NM_01948  | 55960    | Ebag9      | AI835379 I |
| chr8  | 1.09E+08 | 1.09E+08 | 5' UTR (NV | 5' UTR (NV | 186    | NM_17683  | 77411    | Esrp2      | 9530027K2  |
| chr14 | 37123552 | 37123700 | Intergenic | L1M5 LINE  | 215475 | NM_17500  | 218921   | 4930474N(- |            |
| chr18 | 39650927 | 39651050 | Intergenic | CpG        | -4089  | NM_00817  | 14815    | Nr3c1      | GR Grl-1 C |
| chr1  | 26562702 | 26562850 | Intergenic | RMER19C    | 181529 | NM_00103  | 210940   | 4931408C2- |            |
| chr4  | 1.49E+08 | 1.49E+08 | intron (NM | intron (NM | -50796 | NM_00129  | 16561    | Kif1b      | A530096N(- |
| chr8  | 4613552  | 4613700  | intron (NM | intron (NM | 456    | NM_14559  | 233987   | Zfp958     | -          |
| chr1  | 72204977 | 72205100 | TTS (NM_0  | TTS (NM_0  | 53843  | NM_00100  | 381269   | Mreg       | Gm974 W    |
| chr1  | 1.41E+08 | 1.41E+08 | intron (NM | CpG        | 210    | NM_02160  | 59125    | Nek7       | 2810460C1  |
| chr14 | 34187327 | 34187550 | Intergenic | Intergenic | 72906  | NM_01670  | 26419    | Mapk8      | AI849689 . |
| chr11 | 76057277 | 76057400 | promoter-1 | promoter-1 | 100    | NM_18326  | 67390    | Rnmtl1     | 4833420N(- |
| chr9  | 1.14E+08 | 1.14E+08 | exon (NM_  | exon (NM_  | 239    | NM_00116  | 18571    | Pdcd6ip    | AI480591 , |
| chr2  | 5765552  | 5765725  | promoter-1 | promoter-1 | 368    | NM_13383  | 98828    | Cdc123     | AA959893   |
| chrX  | 7418452  | 7418675  | promoter-1 | promoter-1 | -394   | NM_00129  | 54644    | Otud5      | AA407879   |
| chrX  | 10271102 | 10271200 | Intergenic | Lx8 LINE L | -23340 | NM_02652  | 68041    | Mid1ip1    | 3110038L0  |
| chr13 | 47288927 | 47289000 | promoter-1 | promoter-1 | -409   | NM_00117  | 218215   | Rnf144b    | BC025007   |
| chr19 | 37568227 | 37568350 | Intergenic | Intergenic | -56620 | NM_17535  | 107371   | Exoc6      | 4833405E0  |
| chr6  | 1.2E+08  | 1.2E+08  | promoter-1 | promoter-1 | -201   | NR_045558 | 67200    | Ccdc77     | 2400002C2  |
| chr2  | 1.49E+08 | 1.49E+08 | Intergenic | Intergenic | -91897 | NM_02140  | 58214    | Cst10      | DD72       |
| chr5  | 1.49E+08 | 1.49E+08 | Intergenic | Intergenic | -1199  | NM_01022  | 14254    | Flt1       | AI323757 I |
| chr1  | 1.46E+08 | 1.46E+08 | intron (NM | intron (NM | 980    | NM_01956  | 56207    | Uchl5      | 5830413B1  |
| chr15 | 98371602 | 98371800 | Intergenic | Intergenic | -7001  | NM_00128  | 69612    | Kansl2     | 2310037I2, |
| chr2  | 1.65E+08 | 1.65E+08 | intron (NM | CpG        | 203    | NM_14489  | 228869   | Ncoa5      | CIA        |
| chr10 | 18773302 | 18773575 | Intergenic | L1_Mur3 L  | -38222 | NM_00939  | 21929    | Tnfaip3    | A20 Tnfip3 |
| chr1  | 92131277 | 92131475 | Intergenic | Intergenic | 30821  | NM_00772  | 12778    | Ackr3      | AW541270   |
| chr1  | 97236502 | 97236675 | Intergenic | RMER19B    | 26383  | NM_02632  | 67698    | Fam174a    | 2310044D2  |
| chr17 | 74889152 | 74889350 | intron (NM | CpG        | 418    | NM_02641  | 67864    | Yipf4      | 2310034L0  |
| chr14 | 58374927 | 58375175 | Intergenic | MER58B D   | -10091 | NM_01577  | 50523    | Lats2      | 4932411G(- |
| chr16 | 45742902 | 45743050 | promoter-1 | promoter-1 | 92     | NM_00127  | 213012   | Abhd10     | -          |
| chr17 | 56272102 | 56272225 | exon (NM_  | exon (NM_  | 1112   | NM_01366  | 20359    | Sema6b     | Sema Sem   |
| chr10 | 67012177 | 67012300 | promoter-1 | promoter-1 | -535   | NM_00100  | 211488   | Ado        | Gm237      |
| chr17 | 35036252 | 35036325 | intron (NM | intron (NM | 369    | NM_14583  | 110147   | Ehmt2      | Bat8 D17E  |
| chr2  | 1.28E+08 | 1.28E+08 | intron (NM | intron (NM | -68023 | NM_20768  | 12125    | Bcl2l11    | 1500006F2  |
| chr12 | 32867502 | 32867775 | intron (NM | MIR SINE   | 25565  | NM_00114  | 30955    | Pik3cg     | 5830428L0  |
| chr14 | 35489202 | 35489325 | intron (NM | intron (NM | 2149   | NM_00130  | 218914   | Wapal      | A530089A2  |
| chr15 | 78078252 | 78078350 | intron (NM | intron (NM | 3060   | NM_00867  | 17972    | Ncf4       | AI451400 I |
| chr13 | 1.13E+08 | 1.13E+08 | intron (NM | LTR40b LT  | 10298  | NM_01056  | 16195    | Il6st      | 5133400AC  |
| chr4  | 1.16E+08 | 1.16E+08 | intron (NM | intron (NM | 19201  | NM_02665  | 68276    | Toe1       | 4930584N2  |
| chr8  | 1.07E+08 | 1.07E+08 | exon (NM_  | exon (NM_  | 5032   | NM_18199  | 1.01E+08 | Cmtm1      | CHLFH1a C  |
| chr3  | 1.21E+08 | 1.21E+08 | intron (NM | intron (NM | 3536   | NM_14539  | 213603   | Slc44a3    | BC010552   |
| chr14 | 66852802 | 66852925 | intron (NM | intron (NM | -20474 | NM_00116  | 19229    | Ptk2b      | CADTK CAI  |
| chr4  | 1.49E+08 | 1.49E+08 | 5' UTR (NV | 5' UTR (NV | 156    | NM_17337  | 100198   | H6pd       | AI785303 I |
| chr4  | 1.2E+08  | 1.2E+08  | intron (NM | CpG        | 340    | NM_01388  | 29871    | Scmh1      | AI315320 , |
| chr10 | 1.28E+08 | 1.28E+08 | promoter-1 | promoter-1 | -384   | NM_03010  | 78428    | Wibg       | A030010BC  |
| chr7  | 13595152 | 13595400 | promoter-1 | promoter-1 | -127   | NM_00102  | 232879   | Zbtb45     | BB161562   |
| chr4  | 1.27E+08 | 1.27E+08 | 3' UTR (NV | 3' UTR (NV | -7052  | NM_03025  | 80284    | Smim12     | BC003266   |
| chr5  | 31190902 | 31191100 | promoter-1 | promoter-1 | -224   | NM_17484  | 231093   | Agbl5      | 4930455N(- |



|       |          |          |            |            |         |          |        |           |            |
|-------|----------|----------|------------|------------|---------|----------|--------|-----------|------------|
| chr9  | 64130052 | 64130175 | intron (NM | intron (NM | 699     | NM_02537 | 66131  | Tipin     | 1110005AC  |
| chr8  | 86239227 | 86239450 | intron (NM | CpG        | 262     | NM_19798 | 68278  | Ddx39     | 2610307C2  |
| chr4  | 1.37E+08 | 1.37E+08 | promoter-1 | promoter-1 | -316    | NM_13087 | 170707 | Usp48     | 2810449C1  |
| chr18 | 46763952 | 46764200 | intron (NM | intron (NM | 6718    | NM_01012 | 13664  | Eif1a     | C76390 Ef  |
| chr14 | 79643277 | 79643375 | intron (NM | RCHARR1    | 3848    | NM_00103 | 105590 | Zfp957    | AU017455   |
| chr11 | 1.21E+08 | 1.21E+08 | 5' UTR (NM | 5' UTR (NM | 158     | NM_14479 | 209027 | Pycr1     | -          |
| chr8  | 61437127 | 61437475 | Intergenic | MTD-int L  | 46749   | NM_17341 | 234290 | BC030500  | -          |
| chr4  | 1.07E+08 | 1.07E+08 | intron (NM | intron (NM | 1063    | NM_02367 | 72475  | Ssbp3     | 2610021L1  |
| chr2  | 1.8E+08  | 1.8E+08  | intron (NM | intron (NM | 14780   | NM_14450 | 228983 | Osbp12    | C130070J1  |
| chr1  | 1.35E+08 | 1.35E+08 | Intergenic | Intergenic | -25902  | NM_00116 | 269116 | Nfasc     | AA387016   |
| chr6  | 1.35E+08 | 1.35E+08 | intron (NM | intron (NM | 60030   | NM_02637 | 67774  | Loh12cr1  | 5830457J2  |
| chr2  | 1.72E+08 | 1.72E+08 | Intergenic | Intergenic | 97085   | NM_00115 | 21420  | Tfap2c    | AA409384   |
| chr1  | 1.31E+08 | 1.31E+08 | Intergenic | Intergenic | -194700 | NM_00991 | 12767  | Cxcr4     | CD184 Cm   |
| chr17 | 27770777 | 27771025 | intron (NM | ID_B1 SIN  | 1286    | NM_02596 | 67097  | Rps10     | 2210402AC  |
| chr7  | 1.33E+08 | 1.33E+08 | 5' UTR (NM | 5' UTR (NM | 309     | NM_02881 | 74204  | Xpo6      | 2610005L1  |
| chr7  | 1.31E+08 | 1.31E+08 | intron (NM | intron (NM | 56218   | NM_00125 | 628779 | Hs3st4    | EG628779   |
| chr12 | 72237677 | 72238075 | promoter-1 | promoter-1 | 41      | NM_00116 | 76967  | 2700049AC | Talpid3 ml |
| chr1  | 1.72E+08 | 1.72E+08 | intron (NM | intron (NM | 30006   | NM_00906 | 19737  | Rgs5      | 1110070AC  |
| chr1  | 1.09E+08 | 1.09E+08 | intron (NM | RLTR19-int | 10231   | NM_02753 | 70750  | Kdsr      | 6330410P1  |
| chr10 | 20443452 | 20443600 | intron (NM | intron (NM | 1348    | NM_01387 | 29863  | Pde7b     | -          |
| chr7  | 29573877 | 29574150 | promoter-1 | promoter-1 | 25      | NM_17715 | 320435 | Rin1      | 5830482F2  |
| chr12 | 31597027 | 31597125 | promoter-1 | promoter-1 | 542     | NM_01370 | 24057  | Sh3yl1    | AI314953 I |
| chr1  | 1.84E+08 | 1.84E+08 | Intergenic | Intergenic | -15705  | NM_01205 | 27058  | Srp9      | 9kDa       |
| chr6  | 1.21E+08 | 1.21E+08 | intron (NM | CpG        | 21139   | NM_00127 | 194401 | Mical3    | C130040D1  |
| chr12 | 52966802 | 52966950 | Intergenic | Intergenic | -36353  | NM_14478 | 207304 | Hectd1    | A630086PC  |
| chr2  | 1.4E+08  | 1.4E+08  | promoter-1 | promoter-1 | 106     | NM_02709 | 69487  | Ndufaf5   | 2310003L2  |
| chr11 | 1.16E+08 | 1.16E+08 | 5' UTR (NM | 5' UTR (NM | 117     | NM_00821 | 15081  | H3f3b     | 9430068DC  |
| chr9  | 71507877 | 71508075 | intron (NM | B1_Mur1 S  | -67809  | NM_00103 | 102371 | Myzap     | AA407270   |
| chr4  | 8839002  | 8839100  | Intergenic | Intergenic | 221498  | NM_00127 | 320790 | Chd7      | A730019I0  |
| chr17 | 34335127 | 34335375 | 5' UTR (NM | 5' UTR (NM | 111     | NM_01072 | 16913  | Psmb8     | Lmp-7 Lmp  |
| chr17 | 26056477 | 26056550 | intron (NM | CpG-6110   | 146     | NM_13915 | 224624 | Rab40c    | RAR3       |
| chr17 | 26777127 | 26777550 | intron (NM | intron (NM | -36003  | NM_02527 | 11974  | Atp6v0e   | Atp6k Atp  |
| chr19 | 39005802 | 39005950 | intron (NM | CpG        | 396     | NM_00823 | 15201  | Hells     | AI323785 I |
| chr3  | 84472877 | 84473100 | intron (NM | intron (NM | 2874    | NM_17726 | 320782 | Tmem154   | 9930117HC  |
| chr2  | 11627327 | 11627500 | promoter-1 | promoter-1 | 74      | NM_00127 | 16169  | Il15ra    | AA690181   |
| chr10 | 1.21E+08 | 1.21E+08 | intron (NM | intron (NM | 24231   | NM_17733 | 216393 | D930020B1 | 15000171I  |
| chr6  | 84519002 | 84519325 | Intergenic | Intergenic | 24641   | NM_17547 | 232174 | Cyp26b1   | CP26 P450  |
| chr17 | 73268427 | 73268550 | intron (NM | intron (NM | 843     | NM_02999 | 77889  | Lbh       | 1810009F1  |
| chr1  | 88383977 | 88384400 | Intergenic | CpG        | -39123  | NM_00897 | 19231  | Ptma      | Thym       |
| chr9  | 1.19E+08 | 1.19E+08 | promoter-1 | promoter-1 | -168    | NM_01085 | 17874  | Myd88     | -          |
| chr12 | 16532927 | 16533225 | Intergenic | Intergenic | 63500   | NM_01576 | 14245  | Lpin1     | 4631420PC  |
| chr19 | 5972377  | 5972600  | intron (NM | intron (NM | -8282   | NM_00889 | 18969  | Pola2     | AI573378   |
| chr1  | 95650602 | 95650850 | promoter-1 | promoter-1 | 689     | NM_02592 | 67026  | Thap4     | 2010320BC  |
| chr1  | 1.94E+08 | 1.94E+08 | non-coding | non-coding | -11397  | NM_00957 | 22782  | Slc30a1   | AI839647 I |
| chr15 | 96874452 | 96874600 | intron (NM | intron (NM | 11861   | NM_02705 | 69354  | Slc38a4   | 1110012E1  |
| chr7  | 35912202 | 35912350 | Intergenic | Intergenic | 7964    | NM_00767 | 12606  | Cebpa     | C/ebpalpha |
| chr15 | 78859127 | 78859325 | exon (NM_  | exon (NM_  | 584     | NM_00819 | 14958  | H1f0      | D130017DC  |

|       |          |          |                       |        |          |        |          |            |
|-------|----------|----------|-----------------------|--------|----------|--------|----------|------------|
| chr11 | 1.09E+08 | 1.09E+08 | promoter-1promoter-1  | -432   | NM_01030 | 14674  | Gna13    | AU024132   |
| chr2  | 1.64E+08 | 1.64E+08 | intron (NM CpG        | 155    | NM_02557 | 66460  | Sys1     | 261004201  |
| chr1  | 1.83E+08 | 1.83E+08 | Intergenic ORR1D1 L   | -24733 | NM_02840 | 72978  | Cnih3    | 2900075GC  |
| chr3  | 88981727 | 88981850 | TTS (NM_0 TTS (NM_0   | 381    | NM_01188 | 24045  | Scamp3   | Sc3 TU52   |
| chr18 | 66162027 | 66162175 | exon (NM_ exon (NM_   | 188    | NM_02740 | 70361  | Lman1    | 2610020P1  |
| chr12 | 87046077 | 87046250 | intron (NM intron (NM | 18493  | NM_01676 | 53314  | Batf     | B-ATF SFA  |
| chr6  | 35127502 | 35128100 | intron (NM CpG        | 185    | NM_02751 | 70699  | Nup205   | 3830404OC  |
| chr15 | 85062502 | 85062950 | intron (NM intron (NM | 26288  | NM_01018 | 14114  | Fbln1    | -          |
| chr8  | 1.08E+08 | 1.08E+08 | exon (NM_ exon (NM_   | 113    | NM_14895 | 104394 | E2f4     | 2010111M   |
| chr2  | 1.48E+08 | 1.48E+08 | Intergenic Intergenic | -78805 | NM_01074 | 17064  | Cd93     | 6030404GC  |
| chr6  | 86959902 | 86960000 | exon (NM_ exon (NM_   | 121    | NM_02004 | 56748  | Nfu1     | 0610006G1  |
| chr3  | 75360802 | 75360950 | promoter-1promoter-1  | -102   | NM_01974 | 56426  | Pdcd10   | 2410003B1  |
| chr1  | 38160827 | 38160900 | intron (NM MTD LTR    | 25644  | NM_01957 | 56210  | Rev1     | 111002712: |
| chr12 | 73750027 | 73750350 | Intergenic Intergenic | 15627  | NM_02552 | 66375  | Dhrs7    | 2310016E2  |
| chr12 | 21292877 | 21292975 | promoter-1promoter-1  | 768    | NM_01881 | 54451  | Cpsf3    | -          |
| chr12 | 8507627  | 8507750  | promoter-1promoter-1  | -897   | NM_00748 | 11852  | Rhob     | AA017882   |
| chr9  | 44152252 | 44152350 | promoter-1promoter-1  | 10     | NM_01355 | 15288  | Hmbs     | PBGD T25(  |
| chr5  | 75028452 | 75028875 | intron (NM intron (NM | 45234  | NM_01072 | 16924  | Lnx1     | Lnx        |
| chr15 | 9695477  | 9695550  | Intergenic Intergenic | -16952 | NM_17712 | 320277 | Spef2    | C230086AC  |
| chr1  | 1.94E+08 | 1.94E+08 | Intergenic Intergenic | -30327 | NM_17226 | 226856 | Lpgat1   | AI649174 , |
| chr11 | 1.04E+08 | 1.04E+08 | intron (NM intron (NM | 58301  | NM_00128 | 17762  | Mapt     | AI413597 , |
| chr15 | 96567377 | 96567500 | Intergenic ORR1D2 L   | -37309 | NM_17512 | 67760  | Slc38a2  | 5033402L1  |
| chr7  | 31004852 | 31004950 | Intergenic Intergenic | 12147  | NM_02554 | 66411  | Tbcb     | 2410007D1  |
| chr11 | 95936002 | 95936075 | intron (NM MER5B DN   | 907    | NM_00116 | 11951  | Atp5g1   | -          |
| chr10 | 98632452 | 98632600 | intron (NM intron (NM | 61757  | NM_01573 | 14426  | Galnt4   | AV011803   |
| chr5  | 1.15E+08 | 1.15E+08 | intron (NM intron (NM | 5664   | NM_02671 | 68420  | Ankrd13a | 1100001D1  |
| chr16 | 32595402 | 32595475 | Intergenic Intergenic | -13544 | NM_01163 | 22042  | Tfrc     | 2610028K1  |
| chr3  | 9890877  | 9891025  | Intergenic Lx2 LINE L | -57272 | NM_00119 | 94212  | Pag1     | Cbp F7300  |
| chr14 | 55635102 | 55635200 | intron (NM intron (NM | 860    | NM_02689 | 68966  | Ngdn     | 1500001L1  |
| chr4  | 32702002 | 32702150 | promoter-1promoter-1  | -372   | NM_00112 | 26885  | Casp8ap2 | AA387232   |
| chr3  | 19219902 | 19220100 | Intergenic Intergenic | -8679  | NM_00112 | 18583  | Pde7a    | AU015378   |
| chr17 | 4908277  | 4908475  | Intergenic CpG        | -86698 | NM_00108 | 239985 | Arid1b   | 8030481M   |
| chr3  | 1.08E+08 | 1.08E+08 | intron (NM CpG        | 442    | NM_18140 | 99512  | Wdr47    | 1810073M   |
| chr10 | 1.28E+08 | 1.28E+08 | intron (NM CpG        | 133    | NM_17279 | 237615 | Ankrd52  | 6430544CC  |
| chr8  | 85297177 | 85297250 | intron (NM intron (NM | 812    | NM_14560 | 30932  | Zfp330   | BC008086   |
| chr2  | 90894252 | 90894400 | 5' UTR (NV 5' UTR (NV | 153    | NM_00894 | 19182  | Psmc3    | TBP-1      |
| chr7  | 87160402 | 87160575 | Intergenic Intergenic | -9212  | NM_00114 | 209225 | Zfp710   | 5430400NC  |
| chr1  | 1.23E+08 | 1.23E+08 | intron (NM CpG        | 231    | NM_02586 | 66942  | Ddx18    | 2310005B1  |
| chr16 | 32099227 | 32099325 | promoter-1promoter-1  | 537    | NM_00111 | 72084  | Pigx     | 2010319C1  |
| chr7  | 51654252 | 51654350 | intron (NM intron (NM | 14805  | NM_01666 | 20981  | Syt3     | AI385753 : |
| chr4  | 1.16E+08 | 1.16E+08 | exon (NM_ exon (NM_   | 273    | NM_00104 | 17776  | Mast2    | MAST205    |
| chr2  | 29979702 | 29979875 | intron (NM CpG        | 343    | NM_17869 | 227693 | Zer1     | C230075L1  |
| chr16 | 23983027 | 23983200 | intron (NM intron (NM | 5585   | NM_00974 | 12053  | Bcl6     | Bcl5       |
| chr6  | 17644102 | 17644175 | 5' UTR (NV 5' UTR (NV | 144    | NM_00128 | 64213  | St7      | 9430001HC  |
| chr8  | 74684477 | 74684850 | promoter-1promoter-1  | -436   | NM_02312 | 17274  | Rab8a    | AA409338   |
| chr8  | 34838577 | 34838700 | Intergenic MER89 LTI  | -3748  | NM_00116 | 68153  | Gtf2e2   | 34kDa AI4  |
| chr8  | 96536427 | 96536500 | promoter-1promoter-1  | 77     | NM_01178 | 23802  | Amfr     | gp78       |

|       |          |          |            |            |         |           |        |          |            |
|-------|----------|----------|------------|------------|---------|-----------|--------|----------|------------|
| chr2  | 18514027 | 18514175 | Intergenic | Intergenic | -79988  | NM_14777  | 12238  | Commd3   | AW550818   |
| chr2  | 1.44E+08 | 1.44E+08 | promoter-1 | promoter-1 | 48      | NM_00128  | 74528  | Mgme1    | 843040610  |
| chr9  | 1.03E+08 | 1.03E+08 | promoter-1 | promoter-1 | -535    | NM_13397  | 22041  | Trf      | AI266983 I |
| chr14 | 56387752 | 56387875 | TTS (NM_0  | TTS (NM_0  | 3014    | NM_00851  | 16995  | Ltb4r1   | BLT1 BLTR  |
| chr5  | 1.2E+08  | 1.2E+08  | Intergenic | Intergenic | -98209  | NM_02876  | 74111  | Rbm19    | 1200009AC  |
| chr2  | 1.79E+08 | 1.79E+08 | intron (NM | intron (NM | 213055  | NM_00986  | 12561  | Cdh4     | AW120700   |
| chr12 | 25785777 | 25786000 | Intergenic | CpG        | -4931   | NM_01049  | 15902  | Id2      | AI255428 I |
| chr1  | 52289277 | 52289350 | intron (NM | CpG        | 763     | NM_00108  | 14660  | Gls      | 6330442B1  |
| chr13 | 12130977 | 12131300 | intron (NM | intron (NM | 68074   | NM_02386  | 20191  | Ryr2     | 933012712  |
| chr5  | 23957327 | 23957625 | promoter-1 | promoter-1 | -519    | NM_13915  | 213990 | Agap3    | AGAP-3 AV  |
| chr2  | 38339102 | 38339400 | Intergenic | (CA)n Sim  | -27966  | NM_02160  | 59126  | Nek6     | 1300007CC  |
| chr4  | 55363027 | 55363350 | 5' UTR (NV | 5' UTR (NV | 274     | NM_00901  | 19359  | Rad23b   | 0610007D1  |
| chr1  | 6896027  | 6896150  | Intergenic | Intergenic | 175956  | NR_045188 | 240690 | St18     | AV348974   |
| chr12 | 29319402 | 29321300 | exon (NM_  | exon (NM_  | 467     | NM_01130  | 20115  | Rps7     | Mtu Rps7A  |
| chr9  | 44903677 | 44903975 | intron (NM | intron (NM | 16560   | NM_00100  | 270152 | Amica1   | AMICA Cre  |
| chr7  | 36984152 | 36984300 | Intergenic | Intergenic | -396218 | NM_17773  | 668501 | Zfp507   | 181002201  |
| chr18 | 23833377 | 23833450 | Intergenic | Intergenic | -77421  | NM_00116  | 212307 | Mapre2   | AI314113 I |
| chr17 | 5493077  | 5493175  | 5' UTR (NV | 5' UTR (NV | 526     | NM_14607  | 224454 | Zdhhc14  | B530001KC  |
| chr11 | 95611952 | 95612175 | intron (NM | intron (NM | 1682    | NM_20160  | 268469 | Zfp652   | 9530033F2  |
| chr17 | 25965952 | 25966075 | promoter-1 | promoter-1 | 25      | NM_02810  | 72106  | Jmjd8    | 2610003J0  |
| chr11 | 1.18E+08 | 1.18E+08 | intron (NM | intron (NM | 122     | NM_18132  | 217353 | Tmc6     | D11Ert20   |
| chr17 | 27759877 | 27760000 | promoter-1 | promoter-1 | -29     | NM_00129  | 56409  | Nudt3    | 1110011BC  |
| chr10 | 1.27E+08 | 1.27E+08 | intron (NM | intron (NM | 374     | NM_00125  | 108037 | Shmt2    | 2700043DC  |
| chr7  | 1.43E+08 | 1.43E+08 | intron (NM | intron (NM | 8161    | NM_17866  | 212070 | Clrn3    | AI649392 I |
| chr15 | 38612252 | 38612800 | intron (NM | intron (NM | 20867   | NM_02549  | 66335  | Atp6v1c1 | 1700025B1  |
| chr9  | 64879752 | 64879850 | promoter-1 | promoter-1 | -464    | NM_02890  | 74388  | Dpp8     | 231000410  |
| chr6  | 1.29E+08 | 1.29E+08 | intron (NM | intron (NM | 6464    | NM_17768  | 232413 | Clec12a  | CLL-1 D23  |
| chr1  | 88383702 | 88383925 | Intergenic | CpG        | -39498  | NM_00897  | 19231  | Ptma     | Thym       |
| chr10 | 1.28E+08 | 1.28E+08 | promoter-1 | promoter-1 | -473    | NM_03125  | 83430  | Il23a    | IL-23 p19  |
| chr13 | 85430377 | 85430450 | Intergenic | Intergenic | -1322   | NM_14545  | 218397 | Rasa1    | Gap RasG/  |
| chr12 | 1.13E+08 | 1.13E+08 | promoter-1 | promoter-1 | -224    | NM_17804  | 217869 | Eif5     | 2810011H2  |
| chr5  | 1.26E+08 | 1.26E+08 | Intergenic | Intergenic | -3814   | NM_01963  | 22190  | Ubc      | 27000540C  |
| chr5  | 1.22E+08 | 1.22E+08 | Intergenic | L1MA6 LIN  | -1040   | NM_17272  | 231713 | Naa25    | 4833422K1  |
| chr2  | 1.52E+08 | 1.52E+08 | promoter-1 | promoter-1 | -52     | NM_00108  | 24105  | Rbck1    | AL033326   |
| chr10 | 22451327 | 22451725 | promoter-1 | promoter-1 | -273    | NM_01160  | 237336 | Tbpl1    | 4732475GC  |
| chr9  | 1.07E+08 | 1.07E+08 | Intergenic | Intergenic | 6606    | NM_00989  | 12700  | Cish     | AI385595 I |
| chr12 | 16049102 | 16049425 | Intergenic | Intergenic | -225672 | NM_14455  | 217410 | Trib2    | AW319517   |
| chr5  | 1.37E+08 | 1.37E+08 | exon (NM_  | exon (NM_  | 123     | NM_02577  | 66801  | Prkrip1  | 8430424D2  |
| chr1  | 1.57E+08 | 1.57E+08 | promoter-1 | promoter-1 | -49     | NM_00114  | 72482  | Acdb6    | 0610010GC  |
| chr18 | 52997352 | 52997525 | intron (NM | intron (NM | 69640   | NM_00119  | 67847  | Snaip    | 281040701  |
| chr17 | 79134952 | 79135075 | intron (NM | intron (NM | 887     | NM_01150  | 268980 | Strn     | AU022939   |
| chr16 | 32277352 | 32277575 | promoter-1 | promoter-1 | -84     | NM_02735  | 70238  | Rnf168   | 3110001H1  |
| chr4  | 1.55E+08 | 1.55E+08 | intron (NM | intron (NM | 5270    | NM_00103  | 433813 | Pusl1    | 281002111  |
| chr2  | 69885877 | 69886025 | intron (NM | MLT1H2 L   | 8768    | NM_17737  | 329421 | Myo3b    | A430065P1  |
| chr17 | 25152277 | 25152750 | promoter-1 | promoter-1 | -338    | NM_02060  | 57354  | Cramp11  | 5830477HC  |
| chr7  | 30066727 | 30067000 | 5' UTR (NV | 5' UTR (NV | 133     | NM_00108  | 20733  | Spint2   | AL024025   |
| chr6  | 53420102 | 53420200 | Intergenic | Intergenic | -103217 | NM_17272  | 231991 | Creb5    | Crebpa D4  |

|       |          |          |                        |        |          |        |          |            |
|-------|----------|----------|------------------------|--------|----------|--------|----------|------------|
| chr1  | 1.3E+08  | 1.3E+08  | exon (NM_exon (NM_     | 157    | NM_00856 | 17219  | Mcm6     | ASP-11 D1\ |
| chr11 | 57917052 | 57917550 | promoter-1promoter-1   | -354   | NM_02694 | 69125  | Cnot8    | 150001510\ |
| chr7  | 86419802 | 86419875 | intron (NM MIR SINE    | 1686   | NM_01881 | 54608  | Abhd2    | 2210009N1  |
| chr4  | 35115752 | 35115825 | Intergenic MTD LTR I   | -11055 | NM_17806 | 214944 | Mob3b    | 8430436F2  |
| chr7  | 1.4E+08  | 1.4E+08  | exon (NM_exon (NM_     | 129    | NM_02809 | 72096  | Mettl10  | 2010208K1  |
| chr7  | 16642052 | 16642175 | Intergenic B3 SINE B   | -15178 | NM_00109 | 666528 | Zfp541   | EG666528   |
| chr2  | 1.51E+08 | 1.51E+08 | 5' UTR (NV 5' UTR (NV  | 103    | NM_00801 | 14225  | Fkbp1a   | 12kDa FKB  |
| chr15 | 80875902 | 80876025 | intron (NM intron (NM  | 59514  | NM_15304 | 223701 | Mkl1     | AMKL Bsac  |
| chr15 | 76180902 | 76181275 | promoter-1promoter-1   | 452    | NM_02534 | 106025 | Sharpin  | 0610041B2  |
| chr13 | 67406977 | 67407575 | promoter-1promoter-1   | 72     | NM_00100 | 431706 | Zfp457   | Rslcan-6   |
| chr5  | 1.4E+08  | 1.4E+08  | Intergenic Intergenic  | -3353  | NM_00125 | 77053  | Sun1     | 4632417G1  |
| chr1  | 1.58E+08 | 1.58E+08 | Intergenic CpG         | 53596  | NM_00923 | 20652  | Soat1    | 8430426K1  |
| chr15 | 59312302 | 59312500 | intron (NM intron (NM  | 106648 | NM_00116 | 68501  | Nsmce2   | 1110014D1  |
| chr18 | 3337802  | 3338100  | promoter-1promoter-1   | -364   | NM_00111 | 12916  | Crem     | ICER ICER1 |
| chr2  | 1.67E+08 | 1.67E+08 | promoter-1promoter-1   | -179   | NM_02381 | 76367  | Trp53rk  | 2810408M   |
| chr4  | 62180802 | 62181275 | promoter-1promoter-1   | 59     | NM_00852 | 17025  | Alad     | ALADH Lv   |
| chr6  | 47916902 | 47917025 | Intergenic Intergenic  | 13574  | NM_17889 | 101197 | Zfp956   | AI894139   |
| chr5  | 1.46E+08 | 1.46E+08 | intron (NM CpG         | 160    | NM_02829 | 72611  | Zfp655   | 2700038110 |
| chr5  | 1.43E+08 | 1.43E+08 | intron (NM intron (NM  | 750    | NM_19906 | 17425  | Foxk1    | A630048HC  |
| chr18 | 58038152 | 58038525 | promoter-1promoter-1   | 6      | NM_00919 | 20496  | Slc12a2  | 9330166HC  |
| chr1  | 21934977 | 21935150 | intron (NM intron (NM  | 16960  | NM_00116 | 226922 | Kcnq5    | 7730402H1  |
| chr11 | 21139352 | 21139525 | intron (NM CpG         | 403    | NM_00129 | 245944 | Vps54    | Hcc8 Vps5  |
| chr16 | 33251577 | 33251750 | exon (NM_exon (NM_     | 121    | NM_08055 | 69150  | Snx4     | 1810036H1  |
| chr1  | 1.27E+08 | 1.27E+08 | intron (NMRMER1A C     | 4641   | NM_02373 | 74117  | Actr3    | 1200003AC  |
| chr19 | 3881677  | 3881825  | intron (NR_intron (NR_ | 23479  | NM_01692 | 27060  | Tcirg1   | ATP6N1C /  |
| chr2  | 19273652 | 19273725 | Intergenic Intergenic  | -19575 | NM_02961 | 76467  | Msrp2    | 2310050L0  |
| chr11 | 68934827 | 68934950 | intron (NM intron (NM  | 933    | NM_03304 | 84653  | Hes7     | bHLHb37    |
| chr5  | 42006477 | 42006675 | Intergenic Intergenic  | 92818  | NM_02729 | 100972 | Rab28    | 2700023PC  |
| chr4  | 88783077 | 88783150 | promoter-1promoter-1   | -161   | NM_02443 | 66902  | Mtap     | 130001912: |
| chr2  | 75541152 | 75541375 | intron (NM intron (NM  | 1435   | NM_01090 | 18024  | Nfe2l2   | AI194320 I |
| chr19 | 57527352 | 57527450 | promoter-1promoter-1   | 5      | NM_02811 | 72133  | Trub1    | 261000910: |
| chr12 | 56527452 | 56527550 | Intergenic L1MC2 LIN   | 27689  | NM_01196 | 26443  | Psm6     | IOTA       |
| chr16 | 35983502 | 35983625 | 5' UTR (NV 5' UTR (NV  | 114    | NM_00846 | 16646  | Kpna1    | AW494490   |
| chr13 | 1.09E+08 | 1.09E+08 | promoter-1promoter-1   | 65     | NM_02900 | 74559  | Elovl7   | 9130013K2  |
| chr13 | 23618427 | 23618575 | Intergenic Intergenic  | -4412  | NM_15317 | 69386  | Hist1h4h | 1700024HC  |
| chr7  | 1.08E+08 | 1.08E+08 | 3' UTR (NV 3' UTR (NV  | 2474   | NM_18327 | 68185  | Coa4     | 5330414OC  |
| chr12 | 40574827 | 40574900 | Intergenic Intergenic  | 189100 | NM_00748 | 11861  | Arl4a    | AI467555 , |
| chr7  | 1.21E+08 | 1.21E+08 | intron (NR_intron (NR_ | -44833 | NM_01196 | 26440  | Psm1     | C2 HC2 Pr  |
| chr1  | 82792627 | 82793025 | Intergenic Intergenic  | -27795 | NM_02545 | 66261  | Tm4sf20  | 1810018L0  |
| chr1  | 34516627 | 34516975 | intron (NM CpG         | 210    | NM_01120 | 19253  | Ptpn18   | FLP1 HSCF  |
| chr15 | 73015102 | 73015300 | exon (NM_exon (NM_     | 176    | NM_15317 | 239528 | Ago2     | 1110029L1  |
| chr4  | 1.25E+08 | 1.25E+08 | Intergenic Intergenic  | -17388 | NM_15315 | 230738 | Zc3h12a  | BC036563   |
| chr8  | 28370902 | 28371075 | exon (NM_exon (NM_     | 189    | NM_00791 | 13685  | Eif4ebp1 | 4e-bp1 AA  |
| chr13 | 1.13E+08 | 1.13E+08 | intron (NM intron (NM  | 3540   | NM_01194 | 26401  | Map3k1   | MAPKKK1    |
| chr8  | 13213577 | 13213650 | Intergenic Intergenic  | -12989 | NM_02576 | 66790  | Grtp1    | 5430401CC  |
| chrX  | 1.05E+08 | 1.05E+08 | Intergenic RLTR10-int  | 9524   | NM_00103 | 213450 | Gm732    | -          |
| chr16 | 44199427 | 44199675 | intron (NM intron (NM  | 26041  | NM_00102 | 207806 | Gm608    | 5530400K2  |

|       |          |          |                         |        |          |          |           |            |
|-------|----------|----------|-------------------------|--------|----------|----------|-----------|------------|
| chr12 | 79326652 | 79326900 | promoter-1promoter-1    | -866   | NM_17295 | 268566   | Gphn      | 5730552E0  |
| chr2  | 1.45E+08 | 1.45E+08 | intron (NML1MB8 LIN     | -93676 | NM_02549 | 66328    | Scp2d1    | 1700010M   |
| chr16 | 31150452 | 31150700 | intron (NMHAL1-2a_N     | 50748  | NM_03013 | 78618    | Acap2     | 4832442G1  |
| chr15 | 1E+08    | 1E+08    | Intergenic CpG          | -13255 | NM_01012 | 19009    | Pou6f1    | 2310038G1  |
| chr6  | 39512202 | 39512325 | Intergenic B4A SINE     | -4430  | NM_17247 | 209773   | Dennd2a   | B930096L0  |
| chr16 | 24651827 | 24652075 | intron (NML1M4 LINE     | -69990 | NM_00114 | 210126   | Lpp       | 9430020K1  |
| chr7  | 31741302 | 31741400 | intron (NM CpG-12993    | 471    | NM_01168 | 22282    | Usf2      | Usf-2 bHLH |
| chr10 | 1.21E+08 | 1.21E+08 | intron (NM intron (NM   | 3771   | NM_00108 | 73192    | Xpot      | 1110004L0  |
| chr6  | 1.23E+08 | 1.23E+08 | promoter-1promoter-1    | -89    | NM_00113 | 11810    | Apobec1   | Cdar1      |
| chr8  | 26773752 | 26773925 | intron (NM intron (NM   | 23082  | NM_00108 | 234135   | Whsc111   | 6720429E0  |
| chr3  | 89219377 | 89219450 | TTS (NM_0 TTS (NM_0     | 2800   | NM_01690 | 54124    | Cks1b     | 2410005G1  |
| chr15 | 8410102  | 8410175  | Intergenic Intergenic   | -15675 | NM_20123 | 71175    | Nipbl     | Idn3       |
| chr2  | 52784052 | 52784475 | intron (NM intron (NM   | 67361  | NM_17240 | 71409    | Fmnl2     | 5430425K0  |
| chr3  | 89154252 | 89154450 | promoter-1promoter-1    | -419   | NM_00961 | 11490    | Adam15    | MDC15 me   |
| chr14 | 48147277 | 48147500 | intron (NR_ intron (NR_ | 40721  | NM_17259 | 1.01E+08 | Atg14     | 4832427M   |
| chr1  | 54580602 | 54580775 | intron (NM Helitron3N   | 33840  | NM_00116 | 241062   | Pgap1     | 5033403E1  |
| chr17 | 45756802 | 45757100 | Intergenic Intergenic   | -17900 | NM_00117 | 653016   | Gm7325    | EG653016   |
| chr7  | 1.14E+08 | 1.14E+08 | Intergenic Intergenic   | 93183  | NM_00127 | 434223   | Gm1966    | -          |
| chr7  | 78675852 | 78676100 | Intergenic Intergenic   | 775505 | NM_00102 | 244049   | Mctp2     | Gm489      |
| chr16 | 20517152 | 20517350 | 5' UTR (NV 5' UTR (NV   | 114    | NM_00788 | 13544    | Dvl3      | -          |
| chr7  | 1.28E+08 | 1.28E+08 | intron (NM intron (NM   | 723    | NM_00126 | 13631    | Eef2k     | C86191 eE  |
| chr19 | 46866477 | 46866600 | intron (NM MT2B LTR     | 30439  | NM_00110 | 94219    | Cnm2      | AU015877   |
| chr16 | 30064027 | 30064325 | Intergenic CpG          | -1267  | NM_00823 | 15205    | Hes1      | Hry bHLHk  |
| chr5  | 1.48E+08 | 1.48E+08 | intron (NML1ME2 LIN     | 11364  | NM_01022 | 14255    | Flt3      | B230315G0  |
| chr3  | 54415452 | 54415600 | Intergenic Intergenic   | -81501 | NM_01999 | 56790    | Supt20    | AA667204   |
| chr4  | 45932852 | 45933025 | intron (NML1MA4 LIN     | 29763  | NM_19866 | 381522   | E230008N1 | Gm1025     |
| chr14 | 21867127 | 21867450 | intron (NMPB1 SINE ,    | 4376   | NM_01882 | 55946    | Ap3m1     | 1200013D0  |
| chr18 | 75159577 | 75161250 | promoter-1promoter-1    | 282    | NM_00100 | 319195   | Rpl17     | -          |
| chr17 | 71614202 | 71614375 | intron (NM intron (NM   | 46017  | NM_14515 | 246707   | Emilin2   | FOAP-10    |
| chr10 | 62873377 | 62873550 | Intergenic Intergenic   | -19383 | NM_17761 | 216033   | Ctnna3    | 4930429L0  |
| chr6  | 1.24E+08 | 1.24E+08 | intron (NM (CACAC)n :   | 7518   | NM_00127 | 19305    | Pex5      | AW212715   |
| chr4  | 1.36E+08 | 1.36E+08 | Intergenic Intergenic   | -6687  | NM_01373 | 27224    | Tceb3     | 110kDa A/  |
| chr6  | 38900427 | 38900525 | intron (NM intron (NM   | 31491  | NM_01153 | 21391    | Tbxas1    | CYP5 CYP5  |
| chr8  | 1.08E+08 | 1.08E+08 | 5' UTR (NV 5' UTR (NV   | 341    | NM_01364 | 19171    | Psmb10    | Mecl-1 Me  |
| chr18 | 24179427 | 24179600 | promoter-1promoter-1    | -241   | NM_02155 | 59057    | Zfp191    | 3526401F1  |
| chr7  | 1.47E+08 | 1.47E+08 | promoter-1promoter-1    | 63     | NM_19930 | 212508   | Mtg1      | Gm169 Gt   |
| chr3  | 65518327 | 65518675 | intron (NM intron (NM   | 48351  | NM_00116 | 624866   | Lekr1     | EG546798   |
| chr5  | 37139527 | 37140100 | exon (NM_ exon (NM_     | 105    | NM_13372 | 117197   | Bloc1s4   | 2610101N0  |
| chr9  | 63868302 | 63868375 | exon (NM_ exon (NM_     | 1528   | NM_00854 | 17130    | Smad6     | Madh6 b2   |
| chr6  | 91066802 | 91067025 | promoter-1promoter-1    | -93    | NM_01881 | 54563    | Nup210    | 9830001L1  |
| chr13 | 51504427 | 51504575 | intron (NM intron (NM   | 514    | NM_01010 | 13610    | S1pr3     | AI132464   |
| chr6  | 1.19E+08 | 1.19E+08 | Intergenic Intergenic   | -1375  | NM_19798 | 68465    | Adipor2   | 111000111, |
| chr2  | 61431277 | 61431850 | intron (NM CpG          | 409    | NM_00116 | 21353    | Tank      | C86182 E4  |
| chr6  | 83065577 | 83065650 | exon (NM_ exon (NM_     | 113    | NM_02061 | 57377    | Mogs      | 1810017N0  |
| chr3  | 51505477 | 51505650 | intron (NM intron (NM   | 40448  | NM_17499 | 211666   | Mgst2     | GST2 MGS   |
| chr19 | 27291502 | 27291625 | promoter-1promoter-1    | 53     | NM_00116 | 22359    | Vldlr     | AA408956   |
| chr18 | 25674427 | 25674550 | intron (NM intron (NM   | 237996 | NM_13319 | 108013   | Celf4     | A230070D:  |

|       |          |          |            |            |         |          |        |          |            |
|-------|----------|----------|------------|------------|---------|----------|--------|----------|------------|
| chr13 | 57147652 | 57147750 | Intergenic | Lx8 LINE L | -150752 | NM_01203 | 26946  | Trpc7    | TRP-7 TRP  |
| chr7  | 1.19E+08 | 1.19E+08 | intron (NM | CpG        | 531     | NM_17724 | 74996  | Usp47    | 4930502NC  |
| chr13 | 48965852 | 48966025 | intron (NM | GC_rich Lc | 316     | NM_01107 | 18676  | Phf2     | GRC5       |
| chr18 | 32227502 | 32227675 | 5' UTR (NM | 5' UTR (NM | 200     | NM_17344 | 73473  | lws1     | 170006901  |
| chr12 | 39592927 | 39593075 | 3' UTR (NM | 3' UTR (NM | 82703   | NM_00116 | 14009  | Etv1     | ER81 Etsrp |
| chr6  | 37890827 | 37891150 | intron (NM | Lx9 LINE L | 40501   | NM_00127 | 21848  | Trim24   | A130082H2  |
| chr17 | 46210902 | 46211100 | Intergenic | Intergenic | -36952  | NM_02676 | 68565  | Mrps18a  | 111000402  |
| chr1  | 1.72E+08 | 1.72E+08 | Intergenic | RMER5 LTI  | 34751   | NM_13380 | 107652 | Uap1     | AA420407   |
| chr8  | 1.31E+08 | 1.31E+08 | promoter-1 | promoter-1 | -278    | NM_01057 | 16412  | Itgb1    | 4633401G2  |
| chr5  | 97340477 | 97340825 | Intergenic | Intergenic | -86057  | NM_08070 | 140780 | Bmp2k    | 4933417M   |
| chr17 | 57170552 | 57170650 | exon (NM_  | exon (NM_  | 329     | NM_01061 | 16549  | Khsrp    | 6330409F2  |
| chr4  | 1.38E+08 | 1.38E+08 | intron (NM | intron (NM | 7849    | NM_02845 | 73162  | Otud3    | 3110030K1  |
| chr19 | 54085227 | 54085375 | intron (NM | intron (NM | -34371  | NM_00741 | 11551  | Adra2a   | AW122659   |
| chr2  | 1.66E+08 | 1.66E+08 | Intergenic | Intergenic | -9130   | NM_02807 | 72043  | Sulf2    | 2010004N2  |
| chr18 | 49914952 | 49915075 | exon (NM_  | exon (NM_  | 242     | NM_02685 | 68857  | Dtwd2    | 1190002HC  |
| chr2  | 1.04E+08 | 1.04E+08 | Intergenic | Intergenic | -51201  | NM_00114 | 16909  | Lmo2     | Rbtn-2 Rbt |
| chr12 | 56593677 | 56593800 | promoter-1 | promoter-1 | -104    | NM_01090 | 18035  | Nfkbia   | AI462015 I |
| chr19 | 3376802  | 3377375  | intron (NM | intron (NM | -11769  | NM_00103 | 17771  | Mtl5     | tesmin     |
| chr4  | 1.48E+08 | 1.48E+08 | intron (NM | intron (NM | 137037  | NM_02719 | 69743  | Casz1    | 2410019PC  |
| chr2  | 35300152 | 35300325 | intron (NM | intron (NM | 16707   | NM_01028 | 14594  | Ggta1    | AW108479   |
| chr12 | 86814277 | 86814400 | promoter-1 | promoter-1 | -513    | NM_01023 | 14281  | Fos      | D12Rfj1 c- |
| chr10 | 1.11E+08 | 1.11E+08 | exon (NM_  | exon (NM_  | 234     | NM_00934 | 21664  | Phlda1   | DT1P1B11   |
| chr1  | 74478752 | 74478850 | intron (NM | intron (NM | 22843   | NM_00950 | 22349  | Vil1     | Vil        |
| chr14 | 79851477 | 79851800 | promoter-1 | promoter-1 | -4      | NM_00103 | 432879 | Zbtbd6   | EG432879   |
| chr11 | 1.03E+08 | 1.03E+08 | promoter-1 | promoter-1 | -938    | NM_13875 | 192231 | Hexim1   | 7330426E1  |
| chr15 | 93349577 | 93349650 | intron (NM | CpG        | 76709   | NM_00103 | 106042 | Prickle1 | 1110058P2  |
| chr18 | 70708477 | 70708700 | Intergenic | MIR3 SINE  | -18613  | NM_00128 | 26447  | Poli     | Rad30b     |
| chr13 | 52634027 | 52634275 | Intergenic | Intergenic | -7946   | NM_00102 | 68203  | Diras2   | 2900052J1. |
| chr8  | 47637477 | 47637625 | intron (NM | intron (NM | 128     | NM_02797 | 71876  | Cenpu    | 1700029A2  |
| chr14 | 1.06E+08 | 1.06E+08 | Intergenic | Intergenic | -24602  | NM_01189 | 24064  | Spry2    | sprouty2   |
| chr1  | 36748777 | 36748875 | intron (NM | intron (NM | 494     | NM_00994 | 12859  | Cox5b    | -          |
| chr5  | 76733202 | 76733375 | intron (NM | CpG        | 285     | NM_00771 | 12753  | Clock    | 5330400M   |
| chr18 | 25645202 | 25645500 | exon (NM_  | exon (NM_  | 267133  | NM_13319 | 108013 | Celf4    | A230070D:  |
| chr7  | 28589502 | 28589725 | Intergenic | Intergenic | -33990  | NM_01176 | 22717  | Zfp59    | Mfg-2 Mfg  |
| chr15 | 99229927 | 99230275 | 5' UTR (NM | 5' UTR (NM | 6451    | NM_00117 | 110213 | Tmbim6   | 5031406PC  |
| chrX  | 1.47E+08 | 1.47E+08 | 5' UTR (NM | 5' UTR (NM | 130     | NM_00116 | 382245 | Tmem29   | 2700081KC  |
| chr8  | 89412352 | 89412675 | Intergenic | Intergenic | -3356   | NM_03056 | 80750  | N4bp1    | AI481586 I |
| chr4  | 1.18E+08 | 1.18E+08 | Intergenic | MT2B2 LTI  | -13923  | NM_14631 | 18363  | Olfr62   | H12 IH12   |
| chr6  | 1.15E+08 | 1.15E+08 | Intergenic | Intergenic | -5846   | NM_19903 | 381802 | Tsen2    | AU067695   |
| chr10 | 80957477 | 80957675 | intron (NM | intron (NM | 1532    | NM_13400 | 103425 | Ncln     | 3100002P1  |
| chr3  | 1.31E+08 | 1.31E+08 | Intergenic | Intergenic | -81585  | NM_02894 | 74442  | Sgms2    | 4933405A1  |
| chr13 | 43601227 | 43601450 | Intergenic | Intergenic | -24996  | NM_01993 | 56705  | Ranbp9   | IBAP-1 Iba |
| chr9  | 37296527 | 37297000 | promoter-1 | promoter-1 | -143    | NM_14622 | 235184 | Msantd2  | 2810450G1  |
| chr8  | 1.23E+08 | 1.23E+08 | promoter-1 | promoter-1 | -79     | NM_13396 | 102193 | Zdhhc7   | AL024087   |
| chr4  | 71861452 | 71861825 | promoter-1 | promoter-1 | 289     | NM_01159 | 21885  | Tle1     | C230057CC  |
| chr5  | 1.41E+08 | 1.41E+08 | intron (NM | intron (NM | 3313    | NM_02152 | 59031  | Chst12   | AI595374 I |
| chr10 | 67587802 | 67587975 | intron (NM | intron (NM | 145542  | NM_00108 | 170799 | Rtkn2    | B130039D2  |

|       |          |          |                       |         |          |        |           |            |
|-------|----------|----------|-----------------------|---------|----------|--------|-----------|------------|
| chrX  | 1.06E+08 | 1.06E+08 | intron (NMPB1D10 SI   | 47755   | NM_01998 | 56726  | Sh3bgrl   | 1190008F1  |
| chr9  | 1.04E+08 | 1.04E+08 | exon (NM_exon (NM_    | -66040  | NM_14570 | 252837 | Ackr4     | A630091E1  |
| chr9  | 1.04E+08 | 1.04E+08 | Intergenic Intergenic | -18211  | NM_20766 | 56318  | Acpp      | 5'-NT A03C |
| chr14 | 35123002 | 35123800 | promoter-1promoter-1  | 288     | NM_02938 | 75698  | Fam35a    | 3110001K2  |
| chr11 | 79119377 | 79119575 | Intergenic Intergenic | -33918  | NM_01089 | 18015  | Nf1       | AW494271   |
| chr11 | 16215327 | 16215550 | Intergenic Intergenic | 57711   | NM_14596 | 211739 | Vstm2a    | Vstm2      |
| chr19 | 3323802  | 3323950  | intron (NM CpG        | 575     | NM_01349 | 12894  | Cpt1a     | C730027G0  |
| chr13 | 21494602 | 21494925 | promoter-1promoter-1  | -139    | NM_02368 | 72739  | Zkscan3   | 2810435N0  |
| chr1  | 1.93E+08 | 1.93E+08 | intron (NM intron (NM | 5096    | NM_02542 | 66208  | Nenf      | 1110060M   |
| chr1  | 1.22E+08 | 1.22E+08 | intron (NM intron (NM | 28869   | NM_01943 | 170706 | Tmem37    | AI173373 , |
| chr4  | 1.45E+08 | 1.45E+08 | Intergenic Intergenic | 57011   | NM_01130 | 20148  | Dhrs3     | Rsdrl retS |
| chr11 | 1.2E+08  | 1.2E+08  | promoter-1promoter-1  | -129    | NM_13379 | 192662 | Arhgdia   | 5330430M   |
| chr3  | 94846777 | 94846925 | promoter-1promoter-1  | -315    | NM_00895 | 19185  | Psm4      | Af1 Mcb1   |
| chr4  | 9601777  | 9601975  | Intergenic Intergenic | -5385   | NM_00129 | 65973  | Asph      | 2310005F1  |
| chrX  | 39421552 | 39421650 | 5' UTR (NM 5' UTR (NM | 588     | NM_00968 | 11798  | Xiap      | 1110015CC  |
| chr14 | 45945202 | 45945500 | Intergenic MLT1F1 LT  | -4148   | NM_02595 | 67089  | Psmc6     | 2300001E0  |
| chr12 | 99346927 | 99347000 | Intergenic Intergenic | 150584  | NM_00807 | 14420  | Galc      | 2310068BC  |
| chr14 | 52739002 | 52739250 | intron (NM intron (NM | 8548    | NM_02387 | 77945  | Rpgrip1   | 0610005AC  |
| chr5  | 1.16E+08 | 1.16E+08 | exon (NM_exon (NM_    | 140     | NM_02650 | 52064  | Coq5      | 1810014G0  |
| chr1  | 1.57E+08 | 1.57E+08 | intron (NM MLT1K LTF  | 6593    | NM_02143 | 58244  | Stx6      | 2310039E0  |
| chr9  | 1.06E+08 | 1.06E+08 | Intergenic Intergenic | -13228  | NM_02055 | 11655  | Alas1     | ALAS ALAS  |
| chr2  | 76326902 | 76326975 | intron (NM RMER2 LTI  | -10125  | NM_00129 | 99031  | Osbpl6    | 1110062M   |
| chr3  | 65772777 | 65772925 | Intergenic Intergenic | -10704  | NM_01993 | 56706  | Ccn1      | 2610030E2  |
| chr19 | 47929477 | 47929850 | intron (NM CpG        | 184     | NM_01036 | 14873  | Gsto1     | AA407097   |
| chrX  | 1.02E+08 | 1.02E+08 | promoter-1promoter-1  | -116    | NM_00959 | 11306  | Abcb7     | AA517758   |
| chr9  | 19426552 | 19426650 | promoter-1promoter-1  | 66      | NM_17291 | 244713 | Zfp317    | 4932416G0  |
| chr4  | 1.38E+08 | 1.38E+08 | exon (NM_exon (NM_    | 248     | NM_02688 | 68943  | Pink1     | 1190006F0  |
| chr4  | 1.47E+08 | 1.47E+08 | promoter-1promoter-1  | 80      | NM_00128 | 170731 | Mfn2      | D630023P1  |
| chr2  | 27448827 | 27449350 | Intergenic Intergenic | 78421   | NM_08084 | 140858 | Wdr5      | 2410008O0  |
| chr1  | 1.54E+08 | 1.54E+08 | Intergenic Intergenic | -9126   | NM_19799 | 69399  | 1700025G0 | 2610510E0  |
| chr2  | 24167177 | 24167400 | Intergenic Intergenic | 20572   | NM_15307 | 215274 | Il1f10    | -          |
| chr10 | 89245327 | 89245400 | exon (NM_exon (NM_    | 37627   | NM_02916 | 75089  | Uhrf1bp1l | 2010319N2  |
| chr7  | 1.26E+08 | 1.26E+08 | promoter-1promoter-1  | -26     | NM_02319 | 66356  | Knop1     | 2310008H0  |
| chr12 | 1.12E+08 | 1.12E+08 | intron (NM CpG        | 242     | NM_01048 | 15519  | Hsp90aa1  | 86kDa 89k  |
| chr6  | 92164552 | 92164950 | promoter-1promoter-1  | 54      | NM_03008 | 78287  | Zfyve20   | 5330426D1  |
| chr1  | 1.84E+08 | 1.84E+08 | intron (NM intron (NM | -74881  | NM_13381 | 98386  | Lbr       | AI505894 i |
| chr6  | 86388477 | 86388600 | promoter-1promoter-1  | -102    | NM_00124 | 232196 | C87436    | -          |
| chr1  | 1.83E+08 | 1.83E+08 | Intergenic Intergenic | 41833   | NM_00821 | 15078  | H3f3a     | H3.3A      |
| chr1  | 1.72E+08 | 1.72E+08 | intron (NM intron (NM | 21978   | NM_02752 | 70729  | Nos1ap    | 6330408P1  |
| chr3  | 1.08E+08 | 1.08E+08 | 5' UTR (NM 5' UTR (NM | 381     | NM_00128 | 229715 | Amigo1    | Amigo ali2 |
| chr8  | 47399052 | 47399475 | Intergenic Intergenic | -19238  | NM_17378 | 234219 | Helt      | A830086M   |
| chr6  | 1.03E+08 | 1.03E+08 | Intergenic Intergenic | -265144 | NM_00769 | 12661  | Chl1      | A530023M   |
| chr4  | 1.26E+08 | 1.26E+08 | promoter-1promoter-1  | 79      | NM_02554 | 66407  | Mrps15    | 1500003E2  |
| chr1  | 1.81E+08 | 1.81E+08 | intron (NM intron (NM | 471533  | NM_02718 | 69726  | Smyd3     | 2410008A1  |
| chr13 | 74397302 | 74397425 | intron (NM intron (NM | 32394   | NM_00964 | 11624  | Ahrr      | mKIAA1234  |
| chr16 | 70310977 | 70311175 | Intergenic RMER15-in  | -3118   | NM_02880 | 74185  | Gbe1      | 2310045H1  |
| chr1  | 1.83E+08 | 1.83E+08 | intron (NM (TC)n Simf | 1896    | NM_14551 | 226757 | Wdr26     | 1600024AC  |

|       |          |          |            |            |        |          |        |           |             |
|-------|----------|----------|------------|------------|--------|----------|--------|-----------|-------------|
| chr15 | 1E+08    | 1E+08    | promoter-1 | promoter-1 | 323    | NM_00114 | 18174  | Slc11a2   | DCT1 DMT    |
| chr15 | 36385202 | 36385675 | Intergenic | Intergenic | 41108  | NM_17513 | 68839  | Ankrd46   | 1110054NC   |
| chr6  | 91634952 | 91635025 | intron (NM | intron (NM | 927    | NM_00932 | 21366  | Slc6a6    | AA589629    |
| chr12 | 1.02E+08 | 1.02E+08 | non-coding | non-coding | 174    | NM_21135 | 68734  | Smek1     | 1110034CC   |
| chr4  | 1.32E+08 | 1.32E+08 | intron (NM | intron (NM | 533    | NM_00129 | 100336 | Ppp1r8    | 6330548N2   |
| chr10 | 1.14E+08 | 1.14E+08 | Intergenic | Intergenic | 689488 | NM_14624 | 237553 | Trhde     | 9330155P2   |
| chr5  | 21301677 | 21301900 | intron (NM | intron (NM | 10687  | NM_01118 | 19181  | Psmc2     | -           |
| chr1  | 54899302 | 54899425 | intron (NM | intron (NM | 83868  | NM_00108 | 329154 | Ankrd44   | 4930444A1   |
| chrX  | 33623252 | 33623375 | Intergenic | Intergenic | -28821 | NM_13399 | 16164  | Il13ra1   | AI882074 I  |
| chr8  | 1.17E+08 | 1.17E+08 | intron (NM | intron (NM | 155299 | NM_01957 | 80707  | Wwox      | 5330426PC   |
| chr11 | 1.16E+08 | 1.16E+08 | Intergenic | Intergenic | -10120 | NM_17690 | 319370 | Ubald2    | 1110014KC   |
| chr3  | 1.08E+08 | 1.08E+08 | Intergenic | Intergenic | -2747  | NM_01035 | 14862  | Gstm1     | Gstb-1 Gst  |
| chr5  | 1.23E+08 | 1.23E+08 | promoter-1 | promoter-1 | -607   | NM_17542 | 109305 | Orai1     | D730049HC   |
| chr17 | 34258527 | 34258625 | 5' UTR (NM | 5' UTR (NM | 116    | NM_01023 | 14312  | Brd2      | AW228947    |
| chr15 | 76368752 | 76369025 | promoter-1 | promoter-1 | 288    | NM_01390 | 30840  | Fbxl6     | AU021795    |
| chr5  | 24347727 | 24347875 | intron (NM | CpG        | 378    | NM_05307 | 19744  | Rheb      | -           |
| chr7  | 74517977 | 74518225 | promoter-1 | promoter-1 | -357   | NM_00129 | 17258  | Mef2a     | A430079HC   |
| chr9  | 1.06E+08 | 1.06E+08 | 5' UTR (NM | 5' UTR (NM | 150    | NM_15345 | 235584 | Dusp7     | AU015694    |
| chr8  | 1.08E+08 | 1.08E+08 | promoter-1 | promoter-1 | 212    | NM_14582 | 74334  | Ranbp10   | 4432417NC   |
| chr19 | 21345827 | 21345925 | promoter-1 | promoter-1 | -892   | NM_00955 | 22682  | Zfand5    | 2310057AC   |
| chr16 | 25425402 | 25425750 | Intergenic | Intergenic | 138673 | NM_17516 | 71338  | Tprg      | 5430420C1   |
| chr18 | 66637802 | 66638000 | Intergenic | Intergenic | 19643  | NM_02145 | 58801  | Pmaip1    | Noxa        |
| chr8  | 91162902 | 91163025 | Intergenic | Intergenic | -2936  | NM_02784 | 71607  | Snx20     | 9130017C1   |
| chr15 | 89724152 | 89724275 | Intergenic | Intergenic | -51922 | NM_01880 | 54526  | Syt10     | -           |
| chr5  | 1.24E+08 | 1.24E+08 | intron (NM | intron (NM | 6800   | NM_17509 | 23912  | Rhof      | AI845056 I  |
| chr5  | 1.23E+08 | 1.23E+08 | promoter-1 | promoter-1 | -227   | NM_01980 | 56317  | Anapc7    | APC7 AW5    |
| chr16 | 57122552 | 57122750 | intron (NM | intron (NM | 824    | NM_13859 | 28185  | Tomm70a   | 2610044B2   |
| chr19 | 4878102  | 4878450  | promoter-1 | promoter-1 | -367   | NM_01345 | 11474  | Actn3     | -           |
| chr14 | 22650877 | 22651125 | intron (NM | CpG        | 218    | NM_01169 | 22334  | Vdac2     | Vdac6 mVI   |
| chr3  | 68422352 | 68422500 | intron (NM | intron (NM | 46136  | NM_01392 | 30953  | Schip1    | Nf2ip Schij |
| chr1  | 88484027 | 88484175 | intron (NM | intron (NM | 426    | NM_17297 | 26895  | Cops7b    | D1Wsu66e    |
| chr19 | 43991602 | 43991850 | intron (NM | intron (NM | 22962  | NM_02802 | 71972  | Dnmbp     | 2410003L0   |
| chr7  | 1.34E+08 | 1.34E+08 | exon (NM_  | exon (NM_  | 1055   | NM_01077 | 17188  | Maz       | PUR1 Pur-   |
| chr8  | 35172377 | 35172625 | promoter-1 | promoter-1 | -735   | NM_01172 | 22428  | Dctn6     | AU044699    |
| chr12 | 1.1E+08  | 1.1E+08  | intron (NM | MIR SINE   | 12225  | NM_00116 | 14026  | Evl       | AI528774    |
| chr8  | 59967002 | 59967125 | promoter-1 | promoter-1 | -406   | NM_02178 | 60406  | Sap30     | 30kDa       |
| chr7  | 31936127 | 31936750 | promoter-1 | promoter-1 | -369   | NM_02789 | 52857  | Gramd1a   | 1300003M    |
| chr15 | 78729502 | 78729600 | promoter-1 | promoter-1 | -665   | NM_00916 | 20401  | Sh3bp1    | 3BP-1       |
| chr1  | 1.35E+08 | 1.35E+08 | Intergenic | Intergenic | -4517  | NM_13381 | 108954 | Ppp1r15b  | 1810033K1   |
| chr11 | 59761777 | 59762075 | promoter-1 | promoter-1 | 210    | NM_13867 | 192191 | Med9      | BC019367    |
| chr7  | 88092852 | 88093025 | promoter-1 | promoter-1 | -502   | NM_01995 | 56529  | Sec11a    | 1810012E0   |
| chr2  | 1.26E+08 | 1.26E+08 | intron (NM | intron (NM | 16063  | NM_00823 | 15186  | Hdc       | AW108189    |
| chr18 | 23892377 | 23892600 | Intergenic | Intergenic | -18346 | NM_00116 | 212307 | Mapre2    | AI314113 I  |
| chr6  | 82954902 | 82954975 | intron (NM | intron (NM | 28527  | NM_01007 | 13448  | Dok1      | AW557123    |
| chr7  | 4740502  | 4740725  | 3' UTR (NM | 3' UTR (NM | 549    | NM_02938 | 664968 | Tmem238   | 2210411K1   |
| chr1  | 66947552 | 66947900 | Intergenic | L1MD2 LIN  | 34214  | NM_00111 | 17901  | Myl1      | AI325107 I  |
| chr11 | 1.2E+08  | 1.2E+08  | intron (NM | intron (NM | 797    | NM_02798 | 71885  | 2310003HC | Faap100     |



|       |          |          |            |            |        |           |        |          |            |
|-------|----------|----------|------------|------------|--------|-----------|--------|----------|------------|
| chr11 | 54787177 | 54787250 | Intergenic | Intergenic | -10771 | NM_00127  | 57783  | Tnip1    | ABIN ABIN  |
| chr4  | 65957552 | 65957800 | intron (NM | intron (NM | 107841 | NM_01951  | 56079  | Astn2    | 1d8 Astn   |
| chr13 | 42787727 | 42787825 | intron (NM | intron (NM | 11784  | NM_19841  | 218194 | Phactr1  | 9630030F1  |
| chr2  | 68634077 | 68634675 | Intergenic | Intergenic | -65238 | NM_17285  | 241447 | Cers6    | 4732462CC  |
| chr7  | 1.23E+08 | 1.23E+08 | intron (NM | MER119 D   | 27737  | NM_01144  | 20679  | Sox6     | AI987981 ! |
| chr7  | 1.17E+08 | 1.17E+08 | intron (NM | B1_Mur1 !  | 49021  | NM_00930  | 20947  | Swap70   | 70kDa AV2  |
| chr3  | 1.44E+08 | 1.44E+08 | promoter-1 | promoter-1 | 504    | NM_01182  | 23908  | Hs2st1   | AW214369   |
| chr17 | 24607527 | 24607950 | exon (NM_  | exon (NM_  | 320    | NM_02595  | 67078  | Pgp      | 1700012G1  |
| chr6  | 1.43E+08 | 1.43E+08 | promoter-1 | promoter-1 | -427   | NM_00114  | 330440 | Gm766    | -          |
| chr5  | 35003002 | 35003200 | promoter-1 | promoter-1 | 73     | NM_01949  | 14772  | Grk4     | A830025H0  |
| chr5  | 4344452  | 4344750  | Intergenic | L1MA9 LIN  | 152234 | NM_00104  | 208595 | Mterf1b  | ENSMUSGC   |
| chr19 | 41337527 | 41337700 | intron (NM | intron (NM | 881    | NM_13335  | 107358 | Tm9sf3   | 1810073M   |
| chr18 | 32512427 | 32512525 | Intergenic | Lx9 LINE L | -24395 | NM_00108  | 30948  | Bin1     | ALP-1 Amq  |
| chr1  | 60955752 | 60955950 | Intergenic | Intergenic | -10018 | NM_00984  | 12477  | Ctla4    | Cd152 Ctla |
| chr8  | 11575527 | 11575725 | Intergenic | Intergenic | 19560  | NM_01191  | 26356  | Ing1     | 2610028J2  |
| chr16 | 23107002 | 23108200 | promoter-1 | promoter-1 | 60     | NR_11033! | 13682  | Eif4a2   | 4833432NC  |
| chr10 | 79371477 | 79371600 | intron (NM | CpG        | 145    | NM_00116  | 216154 | Med16    | 95kDa A63  |
| chr3  | 1.03E+08 | 1.03E+08 | exon (NM_  | exon (NM_  | 697    | NM_00107  | 94093  | Trim33   | 8030451NC  |
| chr1  | 16508927 | 16509075 | intron (NM | C-rich Low | 382    | NM_02530  | 29819  | Stau2    | -          |
| chr11 | 51912377 | 51912500 | 5' UTR (NV | 5' UTR (NV | 112    | NM_01941  | 19052  | Ppp2ca   | PP2A R753  |
| chr9  | 59446427 | 59446800 | intron (NM | (TTC)n Sim | -18478 | NR_03807! | 67287  | Parp6    | 1700119G1  |
| chr6  | 49167677 | 49167850 | Intergenic | CpG        | -2810  | NM_02367  | 140488 | Igf2bp3  | 2610101N1  |
| chr13 | 91062952 | 91063150 | intron (NM | CpG        | 324    | NM_02417  | 66475  | Rps23    | 2410044J1  |
| chr6  | 1.29E+08 | 1.29E+08 | Intergenic | Intergenic | -7879  | NM_00115  | 17059  | Klrb1c   | AI462337 ! |
| chr3  | 1.23E+08 | 1.23E+08 | promoter-1 | promoter-1 | -286   | NM_13385  | 99526  | Usp53    | AA939927   |
| chr9  | 1.2E+08  | 1.2E+08  | Intergenic | Intergenic | -8862  | NM_15328  | 215418 | Csrnp1   | 4931429D1  |
| chr13 | 41701302 | 41701375 | promoter-1 | promoter-1 | -247   | NM_00116  | 621976 | Tmem170k | EG621976   |
| chr10 | 60837977 | 60838075 | intron (NM | intron (NM | 8245   | NM_01375  | 27355  | Pald1    | MMPAL Pa   |
| chr7  | 71144477 | 71144725 | Intergenic | Intergenic | -60800 | NM_02136  | 50794  | Klf13    | 0610043C1  |
| chr8  | 73819827 | 73820150 | intron (NM | ID_B1 SINI | 23375  | NM_00114  | 17925  | Myo9b    | -          |
| chr13 | 96548802 | 96548875 | intron (NM | intron (NM | 81963  | NM_01017  | 14064  | F2rl2    | F730031AC  |
| chr9  | 51771552 | 51771675 | promoter-1 | promoter-1 | 25     | NM_00799  | 14148  | Fdx1     | -          |
| chr12 | 85758152 | 85758425 | exon (NM_  | exon (NM_  | 138    | NM_02552  | 66381  | Rnf113a2 | 2310020H1  |
| chr14 | 28168377 | 28168450 | intron (NM | L1MC4a LI  | -6162  | NM_00128  | 71704  | Arhgef3  | 1200004I2  |
| chr5  | 1.25E+08 | 1.25E+08 | intron (NM | intron (NM | 938    | NM_01977  | 56334  | Tmed2    | 1110032D1  |
| chr4  | 45025902 | 45025975 | promoter-1 | promoter-1 | -654   | NM_17339  | 230119 | Zbtb5    | 5930421110 |
| chr8  | 1.09E+08 | 1.09E+08 | intron (NM | intron (NM | 78895  | NM_17303  | 272538 | Tango6   | AW413431   |
| chr8  | 1.22E+08 | 1.22E+08 | intron (NM | CpG        | 386    | NM_00946  | 22224  | Usp10    | 2610014NC  |
| chr9  | 1.14E+08 | 1.14E+08 | Intergenic | MTD LTR !  | -4359  | NM_00110  | 382111 | Susd5    | Gm1126     |
| chr9  | 66530702 | 66530775 | Intergenic | ORR1D2 L'  | -30755 | NM_17839  | 76459  | Car12    | 2310047E0  |
| chr2  | 78708627 | 78708750 | promoter-1 | promoter-1 | -516   | NM_00945  | 22193  | Ube2e3   | Ubce4 ubc  |
| chr2  | 1.32E+08 | 1.32E+08 | intron (NM | intron (NM | 10786  | NM_17544  | 215653 | Rassf2   | 3830431HC  |
| chr15 | 59541652 | 59541725 | Intergenic | Intergenic | 61479  | NM_14454  | 211770 | Trib1    | A5300900:  |
| chr4  | 1.33E+08 | 1.33E+08 | Intergenic | RMER19B    | 24968  | NM_01695  | 15331  | Hmgn2    | HMG-17 H   |
| chr1  | 1.68E+08 | 1.68E+08 | Intergenic | CpG        | -7866  | NM_00108  | 68481  | Mpzl1    | 1110007A1  |
| chr13 | 1.02E+08 | 1.02E+08 | Intergenic | L1MB2 LIN  | 82609  | NM_00102  | 18708  | Pik3r1   | PI3K p50al |
| chr2  | 28915877 | 28916075 | intron (NM | CpG        | 193    | NM_00944  | 22130  | Ttf1     | AV245725   |

|       |          |          |                         |         |           |        |           |            |
|-------|----------|----------|-------------------------|---------|-----------|--------|-----------|------------|
| chr16 | 17276527 | 17276825 | intron (NM CpG          | 283     | NM_17747  | 224019 | Tmem191c  | 4933405M   |
| chr11 | 9026477  | 9026650  | intron (NM intron (NM   | 8053    | NM_00115  | 22271  | Upp1      | AI325217 I |
| chr5  | 1.14E+08 | 1.14E+08 | intron (NM CpG          | 203     | NM_19810  | 231637 | Ssh1      | AW551225   |
| chr3  | 1.33E+08 | 1.33E+08 | intron (NM CpG          | 452     | NM_14614  | 74776  | Ppa2      | 1110013G1  |
| chr7  | 1.35E+08 | 1.35E+08 | exon (NM_ exon (NM_     | 309     | NM_19801  | 101604 | E430018J2 | AI480612   |
| chr17 | 32500977 | 32501450 | intron (NR_ (CGG)n Sin  | -13691  | NM_01747  | 54194  | Akap8l    | HAP95 Nal  |
| chr12 | 35703802 | 35703875 | Intergenic MIRb SINE    | -28023  | NM_00101  | 217463 | Snx13     | Rgs-px1 m  |
| chr7  | 38971927 | 38972025 | intron (NM intron (NM   | 3170    | NM_02816  | 72244  | 1600014C1 | AI428873   |
| chr13 | 8870252  | 8870325  | promoter-1promoter-1    | 2       | NM_00103  | 207615 | Wdr37     | -          |
| chr7  | 1.07E+08 | 1.07E+08 | Intergenic MTC LTR I    | -1970   | NM_17538  | 108937 | Rnf169    | 2900057KC  |
| chr10 | 81090177 | 81090300 | promoter-1promoter-1    | 115     | NM_18158  | 50721  | Sirt6     | 2810449N1  |
| chr9  | 69837477 | 69837700 | intron (NM CpG          | 315     | NM_00100  | 12175  | Bnip2     | 5730523P1  |
| chr9  | 57488077 | 57488225 | intron (NM intron (NM   | 4836    | NM_00778  | 12988  | Csk       | AW212630   |
| chr13 | 37212152 | 37212350 | Intergenic Intergenic   | -70138  | NM_00116  | 74145  | F13a1     | 1200014I0: |
| chr12 | 1.02E+08 | 1.02E+08 | intron (NM intron (NM   | -16705  | NM_00117  | 238377 | Gpr68     | BB131428   |
| chr4  | 53799102 | 53799325 | 3' UTR (NM 3' UTR (NM   | 6636    | NM_00931  | 21350  | Tal2      | bHLHa19    |
| chr2  | 1.19E+08 | 1.19E+08 | promoter-1promoter-1    | -67     | NM_02717  | 69702  | Ndufaf1   | 2410001M   |
| chr16 | 11176027 | 11176250 | intron (NR_ CpG         | 348     | NR_02750: | 106205 | Zc3h7a    | A430104C1  |
| chr11 | 99002927 | 99003275 | Intergenic MIR SINE     | 13290   | NM_00771  | 12775  | Ccr7      | CD197 Cd   |
| chr18 | 38456377 | 38456525 | promoter-1promoter-1    | -8      | NM_00116  | 56736  | Rnf14     | 2310075CC  |
| chr11 | 93979827 | 93980175 | intron (NM ORR1B2 L1    | 74482   | NM_00102  | 70834  | Spag9     | 3110018CC  |
| chr8  | 67356402 | 67356525 | intron (NM B4A SINE     | 17359   | NM_17863  | 77113  | Klhl2     | 6030411N2  |
| chr2  | 25050077 | 25050300 | exon (NM_ exon (NM_     | 2145    | NM_14611  | 227612 | Tor4a     | A830007P1  |
| chr17 | 12367177 | 12367525 | intron (NM intron (NM   | 55201   | NM_02664  | 68262  | Agpat4    | 1500003P2  |
| chr7  | 52650077 | 52650175 | exon (NM_ exon (NM_     | 891     | NM_00922  | 20637  | Snrnp70   | 2700022N2  |
| chr9  | 20877577 | 20877700 | TTS (NM_0 TTS (NM_0     | 320     | NM_00103  | 68165  | Fdx1l     | B230118G1  |
| chr7  | 1.36E+08 | 1.36E+08 | intron (NM CpG          | 716     | NM_01386  | 29810  | Bag3      | AA407278   |
| chr8  | 72425977 | 72426250 | promoter-1promoter-1    | -1      | NM_03200  | 83984  | Tssk6     | Sstk       |
| chr11 | 87666752 | 87666925 | intron (NM CpG          | 111     | NM_00103  | 380718 | Mks1      | AK190930   |
| chr4  | 98244027 | 98244225 | intron (NM intron (NM   | 30801   | NM_00100  | 12695  | Inadl     | Cipp Patj  |
| chr11 | 58012752 | 58013025 | promoter-1promoter-1    | -170    | NM_01873  | 16145  | Igtp      | AW558444   |
| chr11 | 58681177 | 58681275 | intron (NM RMER15 L     | 484     | NM_17240  | 69944  | 2810021J2 | AI449137   |
| chr11 | 50138877 | 50139075 | intron (NM CpG          | 199     | NM_00111  | 12330  | Canx      | 1110069N1  |
| chr3  | 85623402 | 85623500 | Intergenic Intergenic   | 67989   | NM_17713  | 320302 | Glt28d2   | 4732486J0  |
| chr2  | 89511327 | 89511575 | Intergenic Intergenic   | -3410   | NM_00101  | 259145 | Olfr1251  | GA_x5J8B7  |
| chr10 | 77707327 | 77707900 | promoter-1promoter-1    | -226    | NM_00108  | 216131 | Trappc10  | B230307C2  |
| chr2  | 1.56E+08 | 1.56E+08 | intron (NR_ intron (NR_ | -44161  | NM_02778  | 71405  | Fam83c    | 5530400BC  |
| chr1  | 1.77E+08 | 1.77E+08 | intron (NM intron (NM   | -212501 | NM_01182  | 23893  | Grem2     | Gremlin2 f |
| chr13 | 60609577 | 60609750 | Intergenic Intergenic   | -93645  | NM_00128  | 69635  | Dapk1     | D13Ucla1   |
| chr6  | 88704627 | 88705000 | intron (NM intron (NM   | 30115   | NM_00116  | 23945  | Mgll      | AA589436   |
| chr7  | 89561752 | 89561925 | intron (NM intron (NM   | 77634   | NM_00119  | 269959 | Adamtsl3  | 9230119C1  |
| chr3  | 35646027 | 35646250 | Intergenic Intergenic   | -6922   | NM_02957  | 76295  | Atp11b    | 1110019I1: |
| chr5  | 1.09E+08 | 1.09E+08 | promoter-1promoter-1    | 9       | NM_00750  | 11958  | Atp5k     | 2610008D2  |
| chr5  | 1.03E+08 | 1.03E+08 | intron (NM intron (NM   | 56503   | NM_02927  | 231532 | Arhgap24  | 0610025G2  |
| chr7  | 1.35E+08 | 1.35E+08 | promoter-1promoter-1    | 60      | NM_17802  | 233904 | Setd1a    | BC010250   |
| chr3  | 51162952 | 51163125 | Intergenic CpG          | -18472  | NM_02350  | 69257  | Elf2      | 2610036A2  |
| chr10 | 11000427 | 11000650 | promoter-1promoter-1    | -590    | NM_02796  | 71865  | Fbxo30    | 1700026A1  |

|       |          |          |            |            |         |          |        |            |             |
|-------|----------|----------|------------|------------|---------|----------|--------|------------|-------------|
| chr1  | 1.33E+08 | 1.33E+08 | intron (NM | intron (NM | 3364    | NM_01977 | 56489  | lkbke      | AW558201    |
| chr15 | 96540902 | 96540975 | Intergenic | Intergenic | -10809  | NM_17512 | 67760  | Slc38a2    | 5033402L1   |
| chr12 | 1.06E+08 | 1.06E+08 | Intergenic | Intergenic | -3282   | NM_17250 | 212073 | Syne3      | nesprin-3   |
| chr9  | 42072377 | 42072500 | promoter-1 | promoter-1 | -55     | NM_17276 | 235293 | Sc5d       | A830037KC   |
| chr8  | 86671777 | 86672200 | promoter-1 | promoter-1 | 51      | NM_02904 | 74666  | 4930432K2- |             |
| chr7  | 1.03E+08 | 1.03E+08 | Intergenic | Intergenic | -39621  | NM_01185 | 23966  | Tenm4      | Doc4 ELM:   |
| chr1  | 1.41E+08 | 1.41E+08 | Intergenic | Intergenic | -8847   | NM_17264 | 226470 | Zbtb41     | 8430415N2   |
| chr15 | 66645602 | 66645800 | intron (NM | intron (NM | 17690   | NM_00102 | 20491  | Sla        | Slap Slap-1 |
| chr5  | 44173902 | 44174050 | promoter-1 | promoter-1 | -588    | NM_17872 | 242960 | Fbxl5      | Fbl4 Fir4   |
| chr1  | 51535627 | 51535750 | promoter-1 | promoter-1 | -445    | NM_02869 | 109019 | Nabp1      | 4930434HC   |
| chr11 | 86348027 | 86348350 | intron (NM | intron (NM | 10121   | NM_02825 | 72508  | Rps6kb1    | 26103181!   |
| chr1  | 1.52E+08 | 1.52E+08 | intron (NM | intron (NM | 14551   | NM_00886 | 18783  | Pla2g4a    | Pla2g4 cPL  |
| chr11 | 67613727 | 67614000 | intron (NM | URR1B DN   | 2090    | NM_00101 | 68460  | Dhrs7c     | 1110001P1   |
| chr19 | 32978102 | 32978175 | Intergenic | Intergenic | 146071  | NM_00896 | 19211  | Pten       | 2310035OC   |
| chr15 | 6658177  | 6658300  | promoter-1 | promoter-1 | -143    | NM_03016 | 78757  | Rictor     | 4921505C1   |
| chr15 | 11925452 | 11925675 | intron (NM | CpG        | 199     | NM_01129 | 20024  | Sub1       | AI842364 I  |
| chr7  | 17611552 | 17611700 | intron (NM | L2b LINE L | 1637    | NM_01115 | 19060  | Ppp5c      | AU020526    |
| chr5  | 1.22E+08 | 1.22E+08 | promoter-1 | promoter-1 | 13      | NM_01076 | 17165  | Mapkapk5   | MK5 PRAK    |
| chr2  | 24442627 | 24442725 | Intergenic | LTRIS5 LTR | -111557 | NM_01104 | 18510  | Pax8       | Pax-8       |
| chr12 | 80640102 | 80640350 | intron (NM | (TC)n Sim  | 241888  | NM_00125 | 19363  | Rad51b     | AI553500 I  |
| chr14 | 65276552 | 65276775 | intron (NM | intron (NM | 5295    | NM_00108 | 16554  | Kif13b     | 5330429L1   |
| chr12 | 73186002 | 73186125 | promoter-1 | promoter-1 | 237     | NM_02603 | 67217  | L3hypdh    | 2810055F1   |
| chr5  | 1.38E+08 | 1.38E+08 | intron (NM | intron (NM | 873     | NM_00125 | 68929  | Mospd3     | 1190005J1!  |
| chr18 | 14841577 | 14841875 | promoter-1 | promoter-1 | -303    | NM_00116 | 268996 | Ss18       | D130059H:   |
| chr13 | 94200627 | 94200700 | 3' UTR (NV | 3' UTR (NV | 69100   | NM_02131 | 57748  | Jmy        | -           |
| chr6  | 72908102 | 72908275 | promoter-1 | promoter-1 | 38      | NM_00103 | 19240  | Tmsb10     | Ptmb10 Tk   |
| chr2  | 71112277 | 71112550 | TTS (NM_1  | TTS (NM_1  | 62410   | NM_01006 | 13427  | Dync1i2    | 3110079HC   |
| chr4  | 41081877 | 41081975 | Intergenic | Intergenic | -1128   | NM_02627 | 67615  | Ube2r2     | 1200003M    |
| chr9  | 40622177 | 40622350 | Intergenic | Intergenic | 12907   | NM_03116 | 15481  | Hspa8      | 2410008N1   |
| chr17 | 35263352 | 35263475 | promoter-1 | promoter-1 | 66      | NM_03347 | 114585 | D17H6S53I  | G4 NG34     |
| chr2  | 1.7E+08  | 1.7E+08  | Intergenic | Intergenic | -21481  | NM_02981 | 76960  | Bcas1      | 2210416M    |
| chr8  | 13785277 | 13785425 | promoter-1 | promoter-1 | -264    | NM_02592 | 67031  | Upf3a      | 2600001CC   |
| chr1  | 65232702 | 65232975 | promoter-1 | promoter-1 | 215     | NM_00111 | 15926  | ldh1       | AI314845 ,  |
| chr10 | 43621202 | 43621625 | promoter-1 | promoter-1 | 129     | NM_00108 | 76563  | Qrs1       | 2700038P1   |
| chr8  | 3288602  | 3288950  | Intergenic | Lx9 LINE L | -9159   | NM_01056 | 16337  | Insr       | 4932439J0   |
| chrX  | 13806277 | 13806450 | Intergenic | MLT1G1 L'  | 18089   | NM_00103 | 385328 | Gm5382     | EG385328    |
| chr12 | 70397452 | 70397850 | promoter-1 | promoter-1 | -17     | NM_02711 | 69554  | Klhdc2     | 2310022K1   |
| chr15 | 74762077 | 74762150 | Intergenic | Intergenic | -23368  | NM_00116 | 17069  | Ly6e       | 9804 Ly67   |
| chr4  | 1.52E+08 | 1.52E+08 | intron (NM | intron (NM | 2663    | NM_00125 | 16498  | Kcnab2     | F5 I2rf5 Ki |
| chr19 | 8954777  | 8954975  | 3' UTR (NV | 3' UTR (NV | 547     | NM_00116 | 107197 | Uqcc3      | AI462493 c  |
| chr3  | 1.02E+08 | 1.02E+08 | Intergenic | B3 SINE B. | -20850  | NM_00103 | 242126 | Slc22a15   | 2610034P2   |
| chr19 | 3575527  | 3575650  | intron (NM | CpG        | 161     | NM_00116 | 52036  | Ppp6r3     | 4930528GC   |
| chr14 | 75585652 | 75585800 | intron (NM | intron (NM | 49494   | NM_00887 | 18826  | Lcp1       | AW536232    |
| chr10 | 31328977 | 31329050 | 5' UTR (NV | 5' UTR (NV | 518     | NM_00114 | 268291 | Rnf217     | AU016819    |
| chr2  | 34580927 | 34581075 | exon (NM_  | exon (NM_  | 29751   | NM_02570 | 66691  | Gapvd1     | 2010005BC   |
| chr8  | 3232627  | 3232875  | intron (NM | intron (NM | 46866   | NM_01056 | 16337  | Insr       | 4932439J0   |
| chr1  | 43552952 | 43553050 | intron (NM | MER20 DN   | 50405   | NM_01087 | 17974  | Nck2       | 48334261(I  |

|       |          |          |             |             |         |           |        |            |             |
|-------|----------|----------|-------------|-------------|---------|-----------|--------|------------|-------------|
| chr11 | 98779902 | 98780125 | intron (NM  | intron (NM  | 10548   | NM_01179  | 23834  | Cdc6       | CDC18L      |
| chr9  | 1.08E+08 | 1.08E+08 | exon (NM_   | exon (NM_   | -10377  | NM_14622  | 235606 | Apeh       | -           |
| chr2  | 35293327 | 35293700 | intron (NM  | MIRb SINE   | 23432   | NM_01028  | 14594  | Ggta1      | AW108479    |
| chr3  | 95976727 | 95976825 | intron (NM  | intron (NM  | 303     | NM_15305  | 107701 | Sf3b4      | 49kDa SF3   |
| chr6  | 1.33E+08 | 1.33E+08 | exon (NM_   | exon (NM_   | 269     | NR_073368 | 381820 | 2700089E2  | AI662692    |
| chr1  | 1.07E+08 | 1.07E+08 | intron (NM  | intron (NM  | 71711   | NM_17877  | 320311 | Rnf152     | A930029BC   |
| chr19 | 18653127 | 18653275 | Intergenic  | Intergenic  | 53102   | NM_01737  | 20409  | Ostf1      | C78236 SH   |
| chr11 | 72224727 | 72224800 | exon (NM_   | exon (NM_   | 452     | NM_17777  | 276829 | Smtnl2     | D130058I2   |
| chr10 | 62064877 | 62065175 | promoter-1  | promoter-1  | 20      | NM_01955  | 56200  | Ddx21      | AI255159 ,  |
| chr2  | 1.58E+08 | 1.58E+08 | intron (NM  | intron (NM  | 784     | NM_00848  | 16803  | Lbp        | Bpifd2 Ly8  |
| chr8  | 89312352 | 89312450 | Intergenic  | Intergenic  | -42496  | NM_00917  | 20437  | Siah1a     | AA982064    |
| chr19 | 42222427 | 42222500 | exon (NM_   | exon (NM_   | 584     | NM_18319  | 277010 | Marveld1   | AI504298 I  |
| chr9  | 14849977 | 14850100 | promoter-1  | promoter-1  | -116    | NM_01948  | 55991  | Panx1      | AI847747    |
| chr6  | 8666527  | 8666775  | intron (NM  | intron (NM  | 41807   | NM_00125  | 15893  | Ica1       | 69kDa ICA   |
| chr3  | 1.52E+08 | 1.52E+08 | promoter-1  | promoter-1  | -210    | NM_00128  | 108946 | Zzz3       | 3110065C2   |
| chr5  | 1.08E+08 | 1.08E+08 | promoter-1  | promoter-1  | -255    | NM_02606  | 67266  | Fam69a     | 2900024C2   |
| chr13 | 54794452 | 54794700 | intron (NR_ | intron (NR_ | 745     | NR_027395 | 105239 | Rnf44      | AI854545 I  |
| chr10 | 83904177 | 83904250 | promoter-1  | promoter-1  | -997    | NM_00100  | 77976  | Nuak1      | AU014801    |
| chr12 | 83495027 | 83495200 | intron (NM  | intron (NM  | 82777   | NM_17257  | 217692 | Sipa1l1    | 4931426N1   |
| chr17 | 31795452 | 31795675 | intron (NM  | CpG         | 136     | NM_02418  | 108121 | U2af1      | 2010107D1   |
| chr14 | 8826952  | 8827075  | promoter-1  | promoter-1  | -317    | NM_00787  | 13421  | Dnase1l3   | DNasegam    |
| chr6  | 1.25E+08 | 1.25E+08 | Intergenic  | Intergenic  | 49147   | NM_00765  | 12527  | Cd9        | Tspan29     |
| chr11 | 88725477 | 88725950 | 5' UTR (NV  | 5' UTR (NV  | 187     | NM_00104  | 11640  | Akap1      | AKAP121 A   |
| chr19 | 21738402 | 21738925 | intron (NM  | intron (NM  | 10864   | NM_14609  | 226016 | Abhd17b    | 5730446C1   |
| chr13 | 41096327 | 41096450 | promoter-1  | promoter-1  | 9       | NM_02655  | 68083  | Pak1ip1    | 58304311I!  |
| chr17 | 47874327 | 47874425 | promoter-1  | promoter-1  | 390     | NM_00116  | 21425  | Tfeb       | Tcfef bHLI  |
| chr2  | 1.12E+08 | 1.12E+08 | promoter-1  | promoter-1  | -204    | NM_02651  | 68032  | Emc4       | 2610318KC   |
| chr1  | 1.89E+08 | 1.89E+08 | 5' UTR (NV  | 5' UTR (NV  | 758     | NM_00936  | 21808  | Tgfb2      | BB105277    |
| chr17 | 15838552 | 15838675 | Intergenic  | Intergenic  | -3318   | NM_00769  | 12648  | Chd1       | 4930525N2   |
| chr11 | 96778152 | 96778225 | promoter-1  | promoter-1  | -393    | NM_03024  | 80280  | Cdk5rap3   | 1810007E2   |
| chr3  | 40754527 | 40754725 | promoter-1  | promoter-1  | 73      | NM_00104  | 214048 | Larp1b     | 1700108L2   |
| chr12 | 1.17E+08 | 1.17E+08 | Intergenic  | Intergenic  | -135447 | NM_00100  | 56220  | Zfp386     | Kzfl mKIA,  |
| chr5  | 89149552 | 89149750 | promoter-1  | promoter-1  | -245    | NM_02673  | 68473  | Mob1b      | 1110003E0   |
| chr11 | 29147002 | 29147125 | exon (NM_   | exon (NM_   | 209     | NM_02574  | 216618 | Ccdc104    | 2300003H1   |
| chr3  | 1.42E+08 | 1.42E+08 | promoter-1  | promoter-1  | -486    | NM_17376  | 229905 | Ccbl2      | KATIII Kat3 |
| chr12 | 76834702 | 76835125 | intron (NM  | intron (NM  | 1803    | NM_03075  | 81535  | Sgpp1      | AI463453 !  |
| chr9  | 15110752 | 15110900 | promoter-1  | promoter-1  | 66      | NM_00119  | 70984  | 4931406CC- |             |
| chr4  | 11117602 | 11117750 | promoter-1  | promoter-1  | -822    | NM_00103  | 12448  | Ccne2      | -           |
| chr12 | 77994102 | 77994200 | intron (NM  | intron (NM  | 55697   | NM_14592  | 110606 | Fntb       | 2010013E1   |
| chr3  | 90463527 | 90463900 | Intergenic  | Intergenic  | 5489    | NM_19942  | 381493 | S100a7a    | AY465109    |
| chr16 | 44724427 | 44724750 | intron (NM  | CpG         | 174     | NM_14597  | 212547 | BC027231   | Nepro       |
| chr5  | 32913802 | 32913975 | 5' UTR (NV  | 5' UTR (NV  | 344     | NM_00953  | 22612  | Yes1       | Yes p61-Ye  |
| chr4  | 1.5E+08  | 1.5E+08  | Intergenic  | Intergenic  | -3921   | NM_02056  | 57320  | Park7      | DJ-1 Dj1    |
| chr1  | 1.95E+08 | 1.95E+08 | intron (NM  | intron (NM  | 637     | NM_14488  | 226861 | Hhat       | 2810432O2   |
| chr10 | 88194677 | 88194775 | promoter-1  | promoter-1  | 567     | NM_02585  | 104303 | Arl1       | 2310008D2   |
| chr7  | 85927852 | 85927925 | promoter-1  | promoter-1  | 87      | NM_02333  | 67308  | Mrpl46     | 3110052F1   |
| chr13 | 1.01E+08 | 1.01E+08 | promoter-1  | promoter-1  | 140     | NM_00104  | 19356  | Rad17      | MmRad24     |

|       |          |          |            |            |        |          |        |            |            |
|-------|----------|----------|------------|------------|--------|----------|--------|------------|------------|
| chr13 | 55979002 | 55979475 | Intergenic | Intergenic | -46452 | NM_01109 | 18740  | Pitx1      | Bft P-OTX  |
| chr15 | 99872052 | 99872125 | intron (NM | intron (NM | 2993   | NM_00115 | 239667 | Dip2b      | 4932422C2  |
| chr11 | 98544252 | 98544500 | intron (NM | intron (NM | 508    | NM_00943 | 22123  | Psmd3      | AI255837 , |
| chr4  | 59016127 | 59016350 | exon (NM_  | exon (NM_  | 173    | NM_00103 | 72429  | Dnajc25    | 2010109CC  |
| chr7  | 1.09E+08 | 1.09E+08 | 5' UTR (NV | 5' UTR (NV | 925    | NM_00112 | 16332  | Inpp1      | 51C SHIP2  |
| chr1  | 33553077 | 33553150 | intron (NM | intron (NM | 173526 | NM_00892 | 19076  | Prim2      | AI323589   |
| chr15 | 79518977 | 79519350 | promoter-1 | promoter-1 | -861   | NM_02879 | 74158  | Josd1      | 1300006CC  |
| chr8  | 1.09E+08 | 1.09E+08 | intron (NM | intron (NM | 23901  | NM_00922 | 20650  | Sntb2      | Snt2       |
| chr6  | 99473602 | 99473725 | Intergenic | Intergenic | -88324 | NM_05320 | 108655 | Foxp1      | 3110052D1  |
| chr4  | 45544402 | 45544475 | promoter-1 | promoter-1 | -738   | NM_00103 | 230126 | Shb        | BC028832   |
| chr17 | 66356752 | 66357100 | intron (NM | intron (NM | -56399 | NM_02305 | 65960  | Twsg1      | 1810013J1. |
| chr4  | 1.41E+08 | 1.41E+08 | intron (NM | CpG        | 248    | NR_10234 | 213491 | Szrd1      | 1110022I0: |
| chr4  | 1.55E+08 | 1.55E+08 | intron (NM | intron (NM | 59981  | NM_01138 | 20481  | Ski        | 2310012I0: |
| chr14 | 1.06E+08 | 1.06E+08 | Intergenic | Intergenic | -26115 | NM_01189 | 24064  | Spry2      | sprouty2   |
| chr5  | 65299552 | 65299675 | Intergenic | Intergenic | 24325  | NM_03068 | 21897  | Tlr1       | -          |
| chr4  | 1.33E+08 | 1.33E+08 | Intergenic | Intergenic | -14333 | NM_19930 | 230796 | Wdtdc1     | Gm695 ad   |
| chr15 | 83385952 | 83386025 | exon (NM_  | exon (NM_  | 153    | NM_00103 | 223722 | Mcat       | AI225907   |
| chr18 | 68016852 | 68017025 | intron (NM | intron (NM | 57177  | NM_02755 | 70799  | Cep192     | 4631422C1  |
| chr13 | 64375952 | 64376250 | 5' UTR (NV | 5' UTR (NV | 195    | NM_17258 | 218294 | Cdc14b     | 2810432N1  |
| chr16 | 57083827 | 57083950 | Intergenic | Lx8 LINE L | -12429 | NM_18328 | 69457  | 2310005G1- |            |
| chr9  | 21421002 | 21421150 | intron (NM | CpG        | 463    | NM_00117 | 20586  | Smarca4    | Brg1 HP1-I |
| chr7  | 63274502 | 63274575 | intron (NM | intron (NM | 405    | NM_15357 | 233280 | Nipa1      | 1110027G0  |
| chr1  | 1.73E+08 | 1.73E+08 | Intergenic | Intergenic | -20569 | NM_14455 | 246256 | Fcgr4      | 4833442P2  |
| chr12 | 17551152 | 17551350 | promoter-1 | promoter-1 | -428   | NM_01361 | 18263  | Odc1       | ODC        |
| chr12 | 8320327  | 8320450  | intron (NM | intron (NM | 149    | NM_02142 | 58240  | Hs1bp3     | -          |
| chr13 | 1.05E+08 | 1.05E+08 | intron (NM | intron (NM | 2590   | NM_00128 | 59079  | Erbp2ip    | 1700028E0  |
| chr3  | 1.42E+08 | 1.42E+08 | Intergenic | Intergenic | -18460 | NM_15356 | 229898 | Gbp5       | 5330409J0  |
| chr15 | 84145602 | 84146275 | 3' UTR (NV | 3' UTR (NV | -9212  | NM_02232 | 64099  | Parvg      | AI413459   |
| chr6  | 1.46E+08 | 1.46E+08 | intron (NM | MER58A D   | 277171 | NM_01065 | 16651  | Sspn       | Krag       |
| chr9  | 39999627 | 39999825 | promoter-1 | promoter-1 | -175   | NM_03071 | 80902  | Zfp202     | C130037E2  |
| chr10 | 20031377 | 20031450 | promoter-1 | promoter-1 | -862   | NM_00102 | 72567  | Bclaf1     | 2610102K2  |
| chr4  | 94055102 | 94055325 | Intergenic | Intergenic | 168274 | NM_02636 | 67770  | Caap1      | 5830433M   |
| chr11 | 3166127  | 3166325  | intron (NM | CpG        | 163    | NM_00787 | 13494  | Drg1       | AA408859   |
| chr17 | 29301677 | 29301800 | intron (NM | intron (NM | 29737  | NM_00100 | 442827 | Rab44      | 9830134C1  |
| chr1  | 94807152 | 94807325 | promoter-1 | promoter-1 | -164   | NM_18140 | 108657 | Rnpepl1    | 1110014H1  |
| chr7  | 1.5E+08  | 1.5E+08  | Intergenic | Intergenic | -16194 | NM_00128 | 55925  | Syt8       | -          |
| chr5  | 1.45E+08 | 1.45E+08 | intron (NM | intron (NM | 25621  | NM_00108 | 231876 | Lmtk2      | 2900041G1  |
| chr16 | 10835077 | 10835350 | promoter-1 | promoter-1 | 61     | NM_00116 | 223970 | Rmi2       | A630055G0  |
| chr13 | 75936252 | 75936375 | Intergenic | Intergenic | -41021 | NM_05310 | 93692  | Glrx       | C86710 D1  |
| chr6  | 5510652  | 5510875  | Intergenic | Intergenic | -64485 | NM_01374 | 27273  | Pdk4       | AV005916   |
| chr11 | 72028952 | 72029150 | promoter-1 | promoter-1 | 43     | NM_02606 | 67279  | Med31      | 3110004H1  |
| chr8  | 26713102 | 26713300 | 5' UTR (NV | 5' UTR (NV | 423    | NM_00100 | 234135 | Whsc1l1    | 6720429E0  |
| chr10 | 39978202 | 39978400 | promoter-1 | promoter-1 | -830   | NM_02611 | 67371  | Gtf3c6     | 2410016F1  |
| chr16 | 23106302 | 23106525 | Intergenic | Intergenic | -1128  | NM_00112 | 13682  | Eif4a2     | 4833432N0  |
| chr10 | 80500152 | 80500275 | Intergenic | Intergenic | -3556  | NM_13413 | 106947 | Slc39a3    | AI845814 ; |
| chr2  | 1.46E+08 | 1.46E+08 | Intergenic | Intergenic | -5048  | NM_00103 | 241694 | Ralgapa2   | A230067G;  |
| chr2  | 3554252  | 3554525  | Intergenic | Intergenic | -76342 | NM_02562 | 66540  | Fam107b    | 3110001A1  |

|       |          |          |            |            |         |          |        |            |             |
|-------|----------|----------|------------|------------|---------|----------|--------|------------|-------------|
| chr18 | 38532377 | 38532450 | Intergenic | ORR1E LTF  | -33766  | NM_01193 | 26384  | Gnpda1     | GNPDA Gr    |
| chr3  | 1.32E+08 | 1.32E+08 | intron (NM | intron (NM | 31045   | NM_02026 | 56811  | Dkk2       | -           |
| chr6  | 98676902 | 98677125 | Intergenic | URR1A DN   | 301279  | NM_00119 | 108655 | Foxp1      | 3110052D1   |
| chr5  | 1.48E+08 | 1.48E+08 | 5' UTR (NV | 5' UTR (NV | 247     | NM_01964 | 19933  | Rpl21      | 8430440E0   |
| chr4  | 1.03E+08 | 1.03E+08 | 3' UTR (NV | 3' UTR (NV | 44443   | NM_00103 | 71148  | Mier1      | 4933425I2:  |
| chr15 | 96890952 | 96891075 | Intergenic | Intergenic | -4626   | NM_02705 | 69354  | Slc38a4    | 1110012E1   |
| chr4  | 95828452 | 95828650 | Intergenic | Intergenic | -20708  | NM_00110 | 242546 | Cyp2j12    | BB197342    |
| chr13 | 14705577 | 14705825 | promoter-1 | promoter-1 | 192     | NM_00894 | 19166  | Psma2      | Lmpc3       |
| chr8  | 1.25E+08 | 1.25E+08 | intron (NM | intron (NM | 27270   | NM_15377 | 66965  | Ctu2       | 2310061F2   |
| chr7  | 56653077 | 56653225 | intron (NM | intron (NM | 151592  | NM_17527 | 78286  | Nav2       | 5330421F0   |
| chr6  | 1.37E+08 | 1.37E+08 | Intergenic | Intergenic | 34382   | NM_02389 | 78600  | Pde6h      | A930033D:   |
| chr1  | 1.63E+08 | 1.63E+08 | Intergenic | Intergenic | 17446   | NM_00745 | 11758  | Prdx6      | 1-cysPrx 9. |
| chr6  | 28536827 | 28537075 | intron (NM | intron (NM | 106603  | NM_01977 | 56463  | Snd1       | AL033314    |
| chr2  | 5887102  | 5887400  | intron (NM | intron (NM | 14736   | NM_00108 | 326622 | Upf2       | -           |
| chr11 | 79068252 | 79068450 | promoter-1 | promoter-1 | -154    | NM_01965 | 78889  | Wsb1       | 1110056B1   |
| chr2  | 24284977 | 24285075 | intron (NM | intron (NM | 44109   | NM_17761 | 215632 | Psd4       | BC046518    |
| chrX  | 93152177 | 93152350 | promoter-1 | promoter-1 | 50      | NM_15282 | 76130  | Las1l      | 1810030AC   |
| chr9  | 88201902 | 88202300 | Intergenic | Intergenic | -20346  | NM_01185 | 23959  | Nt5e       | 2210401F0   |
| chr6  | 1.03E+08 | 1.03E+08 | Intergenic | Intergenic | -188282 | NM_00769 | 12661  | Chl1       | A530023M    |
| chr2  | 1.65E+08 | 1.65E+08 | intron (NM | intron (NM | 1474    | NM_17837 | 67538  | Zswim3     | 4921517AC   |
| chr8  | 1.29E+08 | 1.29E+08 | Intergenic | Kanga2_a   | 108570  | NM_02421 | 67952  | Tomm20     | 1810060KC   |
| chr11 | 5345377  | 5345500  | promoter-1 | promoter-1 | -588    | NM_00108 | 407821 | Znrf3      | Gm1167      |
| chr10 | 1.08E+08 | 1.08E+08 | Intergenic | Intergenic | 100093  | NM_05405 | 114774 | Pawr       | 2310001GC   |
| chr11 | 1.16E+08 | 1.16E+08 | intron (NM | CpG        | 455     | NM_14603 | 217337 | Srp68      | 2610024I0:  |
| chr11 | 1.01E+08 | 1.01E+08 | intron (NM | RLTR11A2   | 22874   | NM_21366 | 20848  | Stat3      | 1110034CC   |
| chr1  | 79773502 | 79773875 | intron (NM | intron (NM | 1095    | NM_00108 | 69163  | Mrpl44     | 1810030E1   |
| chr13 | 94924477 | 94924625 | intron (NM | intron (NM | 96800   | NM_17258 | 218454 | Lhfpl2     | 6030465B1   |
| chr17 | 34066202 | 34066725 | promoter-1 | promoter-1 | -376    | NM_00905 | 19732  | Rgl2       | KE1.5 Rab:  |
| chr2  | 1.58E+08 | 1.58E+08 | exon (NM_  | exon (NM_  | 489     | NM_17541 | 109275 | Actr5      | AA545173    |
| chr7  | 5031602  | 5031900  | promoter-1 | promoter-1 | -86     | NM_01014 | 13854  | Epn1       | AA269831    |
| chr6  | 1.27E+08 | 1.27E+08 | intron (NM | intron (NM | 447     | NM_18140 | 101187 | Parp11     | 5330431N2   |
| chr4  | 43706927 | 43707050 | TTS (NM_0  | TTS (NM_0  | 6691    | NM_01948 | 56014  | Olfr70     | MOR262-1    |
| chr10 | 79256077 | 79256150 | promoter-1 | promoter-1 | -204    | NM_02312 | 18483  | Palm       | -           |
| chr1  | 87791077 | 87791150 | promoter-1 | promoter-1 | 28      | NM_02241 | 64294  | Itm2c      | 3110038L0   |
| chr1  | 72309802 | 72309975 | intron (NM | RMER12 L   | 21000   | NM_02352 | 111175 | Pecr       | 2400003B1   |
| chr19 | 4037602  | 4037950  | intron (NM | CpG        | 136     | NM_01354 | 14870  | Gstp1      | GstpiB      |
| chr4  | 1.09E+08 | 1.09E+08 | promoter-1 | promoter-1 | -329    | NM_15339 | 230603 | Ttc39a     | 4922503NC   |
| chr17 | 59900477 | 59900550 | Intergenic | ORR1D2 L   | -747768 | NM_02649 | 67993  | Nudt12     | 0610016O1   |
| chr18 | 40378702 | 40378875 | intron (NM | CpG        | 265     | NM_02331 | 67180  | Yipf5      | 26103111I!  |
| chr14 | 95655277 | 95655450 | Intergenic | Intergenic | -625122 | NM_02573 | 66732  | 4921530L2- | -           |
| chr19 | 32711677 | 32712125 | intron (NM | intron (NM | 17406   | NM_01186 | 23972  | Papss2     | 1810018P1   |
| chr9  | 1.2E+08  | 1.2E+08  | intron (NM | CpG        | 300     | NM_02623 | 67561  | Wdr48      | 8430408H1   |
| chr6  | 40526377 | 40526625 | 3' UTR (NV | 3' UTR (NV | 5114    | NM_14638 | 258381 | Olfr460    | MOR120-2    |
| chr13 | 13616552 | 13616650 | Intergenic | Intergenic | -66075  | NM_01074 | 17101  | Lyst       | D13Sfk13    |
| chr6  | 1.23E+08 | 1.23E+08 | exon (NM_  | exon (NM_  | 5013    | NM_01081 | 17474  | Clec4d     | Clecsf8 Mq  |
| chr15 | 1.02E+08 | 1.02E+08 | promoter-1 | promoter-1 | -292    | NM_00103 | 223918 | Spryd3     | BC008150    |
| chr19 | 30104352 | 30104875 | promoter-1 | promoter-1 | -390    | NM_14487 | 109113 | Uhrf2      | 2310065A2   |

|       |          |          |                       |        |          |        |           |            |
|-------|----------|----------|-----------------------|--------|----------|--------|-----------|------------|
| chr16 | 4560302  | 4560600  | promoter-1promoter-1  | -731   | NM_03118 | 83383  | Tfap4     | AI642933   |
| chr12 | 4483652  | 4483875  | 5' UTR (NM 5' UTR (NV | 297    | NM_01088 | 17977  | Ncoa1     | KAT13A SF  |
| chr1  | 1.69E+08 | 1.69E+08 | intron (NM CpG        | 466    | NM_01999 | 56752  | Aldh9a1   | AA139417   |
| chrX  | 34731277 | 34731350 | promoter-1promoter-1  | -25    | NM_15350 | 69942  | Rnf113a1  | 2810428C2  |
| chr6  | 86992427 | 86992575 | promoter-1promoter-1  | -339   | NM_01352 | 14583  | Gfpt1     | 2810423A1  |
| chr1  | 1.33E+08 | 1.33E+08 | promoter-1promoter-1  | -52    | NM_14550 | 226419 | Dyrk3     | BC006704   |
| chr3  | 97836277 | 97836350 | intron (NM intron (NM | 18852  | NM_01092 | 18129  | Notch2    | AI853703   |
| chr2  | 1.67E+08 | 1.67E+08 | intron (NM intron (NM | -2558  | NM_00108 | 68949  | 1500012F0 | Zfas1      |
| chr16 | 5203502  | 5203650  | exon (NM_exon (NM_    | 529    | NM_01379 | 27426  | Nagpa     | AI596180   |
| chr14 | 21298302 | 21298400 | intron (NM intron (NM | 1004   | NM_00111 | 11750  | Anxa7     | AI265384 , |
| chr18 | 38129702 | 38129900 | promoter-1promoter-1  | -416   | NM_17568 | 319262 | Fchsd1    | A030002D(  |
| chr5  | 88898377 | 88898475 | TTS (NM_0 TTS (NM_0   | 13390  | NM_00966 | 11698  | Ambn      | -          |
| chr9  | 1.14E+08 | 1.14E+08 | intron (NM intron (NM | 22786  | NM_00104 | 636931 | Trim71    | 2610206G2  |
| chr2  | 1.36E+08 | 1.36E+08 | intron (NM intron (NM | 79047  | NM_01382 | 18798  | Plcb4     | A930039J0  |
| chr9  | 24928527 | 24928750 | intron (NM MTA_Mm     | 27642  | NM_02058 | 80517  | Herpud2   | 5031400M   |
| chr2  | 51790302 | 51790775 | promoter-1promoter-1  | -9     | NM_00114 | 71684  | Rbm43     | 0610033I0! |
| chr14 | 15803477 | 15803775 | intron (NM intron (NM | 150297 | NM_00119 | 674895 | Nek10     | Gm282      |
| chr2  | 71916077 | 71916550 | intron (NM intron (NM | 23639  | NM_00120 | 56508  | Rapgef4   | 1300003D1  |
| chr12 | 77468177 | 77468625 | intron (NM intron (NM | 2050   | NM_00117 | 109929 | Zbtb25    | 2810462M   |
| chr2  | 91812477 | 91812675 | Intergenic MER58B D   | -8856  | NM_13830 | 104418 | Dgkz      | E130307BC  |
| chr8  | 1.27E+08 | 1.27E+08 | intron (NM CpG        | 221    | NM_02974 | 76332  | Cog2      | 1190002BC  |
| chr6  | 87864127 | 87864275 | TTS (NM_0 TTS (NM_0   | 231    | NM_17373 | 232210 | Hmces     | 8430410A1  |
| chr3  | 1.04E+08 | 1.04E+08 | TTS (NM_0 TTS (NM_0   | -1467  | NM_17268 | 229675 | Rsbn1     | C230004D(  |
| chr16 | 16896802 | 16896875 | intron (NM intron (NM | 276    | NM_17683 | 68606  | Ppm1f     | 1110021B1  |
| chr12 | 33063827 | 33063925 | exon (NM_exon (NM_    | 222    | NM_00116 | 72123  | Ccdc71l   | 2010109K1  |
| chr11 | 95214752 | 95214975 | intron (NM intron (NM | 16531  | NM_17254 | 215512 | Fam117a   | 5730593F1  |
| chr5  | 1.39E+08 | 1.39E+08 | intron (NM intron (NM | 226    | NM_13390 | 74570  | Zkscan1   | 5930429AC  |
| chr11 | 4233152  | 4233275  | Intergenic Intergenic | 66414  | NM_00103 | 16878  | Lif       | -          |
| chr11 | 1.06E+08 | 1.06E+08 | Intergenic Intergenic | -2832  | NM_19829 | 21763  | Tex2      | 4930568E0  |
| chr19 | 5460452  | 5460650  | promoter-1promoter-1  | -56    | NM_00125 | 58249  | Fibp      | 2010004G(  |
| chr3  | 1.16E+08 | 1.16E+08 | intron (NM intron (NM | -18546 | NM_03001 | 229780 | Trmt13    | 4631408H1  |
| chr2  | 1.54E+08 | 1.54E+08 | intron (NM CpG        | 372    | NM_19930 | 228807 | Zfp341    | Znf341     |
| chr2  | 1.51E+08 | 1.51E+08 | promoter-1promoter-1  | 56     | NM_15378 | 110078 | Pygb      | -          |
| chr3  | 1.3E+08  | 1.3E+08  | intron (NM MIRb SINE  | 4108   | NM_02790 | 71760  | Etnppl    | 1300019H(  |
| chrX  | 50622702 | 50622800 | 5' UTR (NV 5' UTR (NV | 231    | NM_03016 | 78755  | Fam122b   | 4632404H2  |
| chr1  | 64164652 | 64165050 | intron (NM intron (NM | 3112   | NM_03356 | 93691  | Klf7      | 9830124P(  |
| chr13 | 41923927 | 41924175 | intron (NM intron (NM | 18806  | NM_17541 | 109254 | Adtrp     | 9530008L1  |
| chr4  | 40836327 | 40836425 | Intergenic Intergenic | -30713 | NM_01146 | 20731  | Spink4    | MPGC60     |
| chr5  | 1.06E+08 | 1.06E+08 | promoter-1promoter-1  | -200   | NM_00112 | 231549 | Lrrc8d    | 2810473G(  |
| chr1  | 1.21E+08 | 1.21E+08 | intron (NM intron (NM | 29871  | NM_02232 | 64143  | Ralb      | 5730472O!  |
| chr17 | 13407202 | 13407600 | Intergenic Intergenic | -6653  | NM_01374 | 27263  | Smok2a    | Smok2      |
| chr5  | 66329227 | 66329325 | Intergenic Intergenic | -29087 | NM_00108 | 231252 | Chrna9    | 2410015I0! |
| chr13 | 51739752 | 51739900 | promoter-1promoter-1  | -775   | NM_02541 | 66197  | Cks2      | 1110038L1  |
| chr5  | 91089702 | 91089975 | Intergenic Intergenic | -20325 | NM_02847 | 73246  | Rassf6    | 1600016B1  |
| chr3  | 1.04E+08 | 1.04E+08 | promoter-1promoter-1  | -342   | NM_17268 | 229675 | Rsbn1     | C230004D(  |
| chr6  | 39155302 | 39155775 | intron (NM CpG        | 1234   | NM_00103 | 338523 | Kdm7a     | A630082K2  |
| chr2  | 1.68E+08 | 1.68E+08 | Intergenic Intergenic | 116527 | NM_00129 | 18019  | Nfatc2    | AI607462   |

|       |          |          |            |            |         |          |        |           |            |
|-------|----------|----------|------------|------------|---------|----------|--------|-----------|------------|
| chr18 | 15367627 | 15367825 | Intergenic | Intergenic | -57771  | NM_13411 | 106931 | Kctd1     | 4933402K1  |
| chr7  | 51175452 | 51175575 | Intergenic | Intergenic | -13628  | NM_17486 | 317652 | Klk15     | -          |
| chr6  | 41029077 | 41029175 | Intergenic | Intergenic | -43618  | NM_02333 | 67373  | 2210010CC | AV072249   |
| chr5  | 1.25E+08 | 1.25E+08 | intron (NM | intron (NM | 566     | NM_02567 | 66627  | Ogfod2    | 1300006G1  |
| chr7  | 1.3E+08  | 1.3E+08  | 5' UTR (NM | 5' UTR (NM | 102     | NM_14492 | 233833 | Tnrc6a    | 201032110' |
| chr2  | 1.3E+08  | 1.3E+08  | intron (NM | intron (NM | 22837   | NM_00116 | 19262  | Ptpa      | Ptpa Ptpal |
| chr2  | 1.7E+08  | 1.7E+08  | Intergenic | Intergenic | -42938  | NM_00115 | 228913 | Zfp217    | 4933431CC  |
| chr13 | 44680652 | 44680825 | Intergenic | MER20 DN   | -145405 | NM_02187 | 16468  | Jarid2    | Jmj jumon  |
| chr11 | 75300552 | 75300625 | 5' UTR (NM | 5' UTR (NM | 309     | NM_13865 | 192159 | Prpf8     | AU019467   |
| chr1  | 1.64E+08 | 1.64E+08 | promoter-1 | promoter-1 | 25      | NM_14487 | 71449  | Mettl13   | 5630401D2  |
| chr2  | 72076777 | 72077050 | intron (NM | intron (NM | -46781  | NM_02305 | 65964  | Zak       | AV006891   |
| chr16 | 22615902 | 22616125 | intron (NM | intron (NM | 41291   | NM_13865 | 110197 | Dgkg      | 2900055E1  |
| chr4  | 1.18E+08 | 1.18E+08 | intron (NM | intron (NM | 17189   | NM_01121 | 19268  | Ptprf     | AA591035   |
| chr8  | 1.29E+08 | 1.29E+08 | Intergenic | Intergenic | 113758  | NM_02421 | 67952  | Tomm20    | 1810060KC  |
| chr9  | 1.1E+08  | 1.1E+08  | intron (NM | intron (NM | 2351    | NM_00116 | 29873  | Cspg5     | Caleb Ngc  |
| chrX  | 1.39E+08 | 1.39E+08 | intron (NM | intron (NM | 43053   | NM_00100 | 245650 | Gucy2f    | A930002I0  |
| chr13 | 19914852 | 19914975 | intron (NM | intron (NM | 1213    | NM_18175 | 353346 | Gpr141    | PGR13      |
| chr10 | 82161627 | 82161700 | promoter-1 | promoter-1 | -89     | NM_00108 | 67933  | Hcfc2     | 1700129L1  |
| chr2  | 1.29E+08 | 1.29E+08 | Intergenic | MIR SINE   | -22125  | NM_17765 | 228592 | F830045P1 | Sirpb3     |
| chr14 | 1.02E+08 | 1.02E+08 | intron (NM | intron (NM | 151518  | NM_20152 | 380928 | Lmo7      | C78582 FB  |
| chr12 | 4233677  | 4233825  | promoter-1 | promoter-1 | -276    | NM_00120 | 69709  | Ptrhd1    | 2410017PC  |
| chr9  | 77952827 | 77953050 | intron (NM | intron (NM | 3525    | NM_02360 | 71538  | Fbxo9     | 9030401P1  |
| chr5  | 1.3E+08  | 1.3E+08  | Intergenic | Intergenic | 16466   | NM_02691 | 69034  | Nupr1l    | 1810010E0  |
| chr7  | 1.35E+08 | 1.35E+08 | 5' UTR (NM | 5' UTR (NM | 536     | NM_14625 | 244219 | Zfp668    | BC030314   |
| chr3  | 1.07E+08 | 1.07E+08 | intron (NM | intron (NM | 2104    | NM_00765 | 12508  | Cd53      | AI323659 I |
| chr12 | 83429202 | 83429325 | intron (NM | intron (NM | 16927   | NM_17257 | 217692 | Sipa111   | 4931426N1  |
| chr7  | 52383952 | 52384200 | promoter-1 | promoter-1 | 39      | NM_00943 | 22121  | Rpl13a    | 1810026N2  |
| chr8  | 1.23E+08 | 1.23E+08 | promoter-1 | promoter-1 | 599     | NM_01092 | 18117  | Emc8      | Cox4nb Fa  |
| chr4  | 1.29E+08 | 1.29E+08 | Intergenic | Intergenic | -14214  | NM_17287 | 242669 | Azin2     | 4933429I2I |
| chr12 | 33730577 | 33730750 | intron (NM | intron (NM | 47077   | NM_00102 | 68764  | Cdhr3     | 1110049BC  |
| chr4  | 1.08E+08 | 1.08E+08 | promoter-1 | promoter-1 | -435    | NM_17704 | 319965 | Cc2d1b    | A830039BC  |
| chr15 | 55592352 | 55592625 | intron (NM | MLT1N2 L'  | 146016  | NM_01666 | 20649  | Sntb1     | -          |
| chr10 | 79625627 | 79625825 | Intergenic | Intergenic | -4860   | NM_00770 | 12696  | Cirbp     | Cirp R7494 |
| chr1  | 1.73E+08 | 1.73E+08 | intron (NM | intron (NM | 9019    | NM_00862 | 17528  | Mpz       | Mpp P-zer  |
| chr12 | 1.04E+08 | 1.04E+08 | Intergenic | Intergenic | -8659   | NM_17258 | 217837 | Itpk1     | BC031182   |
| chr9  | 72784227 | 72784375 | intron (NM | RMER21B    | 10844   | NM_02811 | 72135  | Pygo1     | 2600014C2  |
| chr19 | 25212752 | 25213025 | intron (NM | intron (NM | -98804  | NM_18140 | 107351 | Kank1     | A930031BC  |
| chr1  | 1.36E+08 | 1.36E+08 | intron (NM | intron (NM | 1833    | NM_15289 | 75605  | Kdm5b     | 2010009J1  |
| chr3  | 1.03E+08 | 1.03E+08 | intron (NM | intron (NM | 1007    | NM_14490 | 229663 | Csde1     | AA960392   |
| chr1  | 80336477 | 80336825 | intron (NM | GC_rich Lc | 354     | NM_01671 | 26554  | Cul3      | AI467304 , |
| chr1  | 15795727 | 15796050 | exon (NM_  | exon (NM_  | 161     | NM_00128 | 21749  | Terf1     | Pin2 Trbf1 |
| chr6  | 99471427 | 99471500 | Intergenic | CpG        | -86124  | NM_05320 | 108655 | Foxp1     | 3110052D1  |
| chr4  | 1.55E+08 | 1.55E+08 | exon (NM_  | exon (NM_  | 731     | NM_01138 | 20481  | Ski       | 2310012I0' |
| chr8  | 24347902 | 24347975 | intron (NM | CpG        | 202     | NM_02424 | 109145 | Gins4     | 2810037CC  |
| chr5  | 1.3E+08  | 1.3E+08  | Intergenic | (CACAC)n : | 37412   | NM_17246 | 22648  | Zfp11     | 6720465D2  |
| chr9  | 52054777 | 52054850 | Intergenic | Intergenic | -78597  | NM_00116 | 244871 | Zc3h12c   | A230108EC  |
| chr5  | 1.07E+08 | 1.07E+08 | intron (NM | CpG        | 798     | NM_02685 | 52397  | Zfp644    | 1110068L0  |



|       |          |          |             |             |         |           |        |           |            |
|-------|----------|----------|-------------|-------------|---------|-----------|--------|-----------|------------|
| chr5  | 97428102 | 97428175 | intron (NM  | intron (NM  | 1430    | NM_08070  | 140780 | Bmp2k     | 4933417M   |
| chr11 | 68912427 | 68912525 | promoter-1  | promoter-1  | 18      | NM_01106  | 18626  | Per1      | Per m-rigu |
| chr7  | 1.18E+08 | 1.18E+08 | intron (NM  | intron (NM  | 4945    | NM_00966  | 11717  | Ampd3     | -          |
| chr12 | 90602802 | 90603075 | intron (NM  | intron (NM  | 411104  | NM_17254  | 18191  | Nrxn3     | -          |
| chr15 | 85863227 | 85863350 | exon (NM_   | exon (NM_   | 919     | NM_00988  | 12614  | Celsr1    | Crsh Scy c |
| chr11 | 75267977 | 75268150 | 5' UTR (NM  | 5' UTR (NM  | 156     | NM_13895  | 192652 | Wdr81     | BC054822   |
| chr1  | 1.59E+08 | 1.59E+08 | intron (NM  | intron (NM  | 20872   | NM_02833  | 72713  | Angptl1   | 2810039DC  |
| chr1  | 1.67E+08 | 1.67E+08 | promoter-1  | promoter-1  | -237    | NM_14551  | 108735 | Sft2d2    | 2010005O1  |
| chr7  | 97624852 | 97624925 | promoter-1  | promoter-1  | -383    | NM_02673  | 68472  | Tmem126k  | 1110001A2  |
| chr12 | 1.14E+08 | 1.14E+08 | intron (NM  | CpG         | 462     | NM_05408  | 116870 | Mta1      | -          |
| chr9  | 82272002 | 82272300 | Intergenic  | URR1A DN    | -451262 | NM_00116  | 65099  | Irak1bp1  | 4921528NC  |
| chr5  | 1.06E+08 | 1.06E+08 | Intergenic  | Intergenic  | -20381  | NM_00103  | 433926 | Lrrc8b    | R75581 Ta  |
| chr4  | 1.17E+08 | 1.17E+08 | promoter-1  | promoter-1  | 29      | NM_02317  | 66233  | Dmap1     | 1500016M   |
| chr11 | 17157502 | 17157850 | promoter-1  | promoter-1  | 55      | NM_02055  | 57316  | C1d       | 1110036E1  |
| chr8  | 59990152 | 59990275 | promoter-1  | promoter-1  | -427    | NM_00825  | 97165  | Hmgb2     | C80539 HM  |
| chr2  | 74447552 | 74447800 | Intergenic  | ORR1C2 L    | -30671  | NM_02713  | 69605  | Lnp       | 2310011O1  |
| chr18 | 55012802 | 55013025 | Intergenic  | Intergenic  | 136921  | NM_17575  | 269023 | Zfp608    | 4932417D1  |
| chr10 | 1.26E+08 | 1.26E+08 | Intergenic  | MLT1L L     | 88564   | NM_02685  | 68876  | Xrcc6bp1  | 1110068E0  |
| chr11 | 57775902 | 57776400 | Intergenic  | Intergenic  | -46415  | NM_02845  | 73158  | Larp1     | 1810024J1  |
| chr13 | 41583827 | 41583925 | Intergenic  | RMER15 L    | -1147   | NM_00111  | 18003  | Nedd9     | Cas-L CasL |
| chr11 | 11464252 | 11464425 | Intergenic  | Intergenic  | 75069   | NM_02866  | 73862  | 4930415F1 | -          |
| chr15 | 99869227 | 99869350 | exon (NM_   | exon (NM_   | 193     | NM_00115  | 239667 | Dip2b     | 4932422C2  |
| chr11 | 1.18E+08 | 1.18E+08 | intron (NM  | RSINE1 SIN  | -21968  | NM_00103  | 72344  | Usp36     | 2700002L0  |
| chr19 | 47654752 | 47655075 | intron (NM  | CpG         | 404     | NM_00116  | 20874  | Slk       | 9A2 AV021  |
| chr9  | 66602077 | 66602250 | intron (NM  | intron (NM  | 40670   | NM_17839  | 76459  | Car12     | 2310047E0  |
| chr3  | 1.21E+08 | 1.21E+08 | Intergenic  | Intergenic  | 22095   | NM_00103  | 619318 | 4930432M  | -          |
| chr11 | 66885877 | 66885975 | Intergenic  | URR1A DN    | -5876   | NM_00109  | 17883  | Myh3      | MyHC-emb   |
| chr2  | 34609527 | 34609775 | intron (NM  | CpG         | 1101    | NM_02570  | 66691  | Gapvd1    | 2010005BC  |
| chr8  | 38057277 | 38057450 | exon (NM_   | exon (NM_   | 734     | NM_00103  | 621080 | Al429214  | -          |
| chr8  | 74247377 | 74247500 | intron (NR_ | intron (NR_ | 2142    | NR_028267 | 74015  | Fcho1     | 3322402E1  |
| chr11 | 33925227 | 33925350 | Intergenic  | Intergenic  | -21913  | NM_01069  | 16822  | Lcp2      | Al323664 I |
| chr17 | 29088752 | 29088975 | Intergenic  | Intergenic  | -1298   | NM_02588  | 66989  | Kctd20    | 2410004N1  |
| chr1  | 1.73E+08 | 1.73E+08 | intron (NM  | intron (NM  | 601     | NM_00948  | 22278  | Usf1      | bHLHb11    |
| chr19 | 19824652 | 19825025 | Intergenic  | Intergenic  | -639152 | NM_00104  | 225998 | Rorb      | Nr1f2 RZR  |
| chr6  | 1.25E+08 | 1.25E+08 | intron (NM  | intron (NM  | 12647   | NM_00765  | 12527  | Cd9       | Tspan29    |
| chr13 | 8994927  | 8995150  | intron (NM  | CpG         | 220     | NM_02700  | 69237  | Gtpbp4    | 2610028CC  |
| chr8  | 80610227 | 80610400 | Intergenic  | Intergenic  | -126928 | NM_18309  | 73301  | Ttc29     | 1700031F1  |
| chr12 | 84958227 | 84958425 | Intergenic  | Intergenic  | -14858  | NM_02734  | 67039  | Rbm25     | 2600011CC  |
| chr17 | 23862952 | 23863075 | promoter-1  | promoter-1  | -290    | NM_02305  | 268930 | Pkmyt1    | 6230424P1  |
| chr5  | 1.38E+08 | 1.38E+08 | intron (NM  | intron (NM  | 3404    | NM_02391  | 78829  | Tsc22d4   | 0610009M   |
| chr5  | 98390752 | 98391050 | intron (NM  | intron (NM  | 69080   | NM_13373  | 71914  | Antxr2    | 2310046B1  |
| chr9  | 98380827 | 98380950 | Intergenic  | RMER15 L    | -10068  | NM_00903  | 19660  | Rbp2      | Crbp-2 Crt |
| chr15 | 53177427 | 53177500 | 5' UTR (NM  | 5' UTR (NM  | 275     | NM_01016  | 14042  | Ext1      | AA409028   |
| chr2  | 1.81E+08 | 1.81E+08 | intron (NM  | MYSERV6-i   | 16086   | NM_00127  | 13002  | Dnajc5    | 2610314I2  |
| chr8  | 1.22E+08 | 1.22E+08 | Intergenic  | Intergenic  | -10624  | NM_02795  | 71839  | Osgin1    | 1700012B1  |
| chr7  | 46705052 | 46705275 | intron (NM  | intron (NM  | 275     | NM_00124  | 233147 | Zfp939    | 9430025M   |
| chr16 | 77014727 | 77014825 | intron (NM  | intron (NM  | 462     | NM_01391  | 30940  | Usp25     | -          |

|       |          |          |                       |         |           |        |         |            |
|-------|----------|----------|-----------------------|---------|-----------|--------|---------|------------|
| chr12 | 77938402 | 77938600 | promoter-1promoter-1  | 47      | NM_14592  | 110606 | Fntb    | 2010013E1  |
| chr7  | 25101252 | 25101400 | intron (NM intron (NM | 359     | NM_00956  | 22756  | Zfp94   | -          |
| chr1  | 7099627  | 7099800  | intron (NML1MA7 LIN   | 20712   | NM_18302  | 319263 | Pcmttd1 | 8430411F1  |
| chr12 | 21128752 | 21128925 | intron (NML1MB5 LIN   | 11221   | NM_00113  | 211914 | Asap2   | 6530401G1  |
| chr3  | 1.45E+08 | 1.45E+08 | Intergenic CpG        | -3577   | NM_01051  | 16007  | Cyr61   | AI325051   |
| chr1  | 64355102 | 64355250 | Intergenic Intergenic | -187213 | NM_03356  | 93691  | Klf7    | 9830124PC  |
| chr3  | 1.05E+08 | 1.05E+08 | intron (NM intron (NM | 1026    | NM_01739  | 53975  | Ddx20   | GEMIN3 d   |
| chr17 | 8823927  | 8824025  | intron (NM intron (NM | 104310  | NM_00129  | 23984  | Pde10a  | -          |
| chr8  | 63110452 | 63110575 | Intergenic Intergenic | -1109   | NM_02775  | 71306  | Mfap3l  | 4933428A1  |
| chr4  | 3622627  | 3622825  | intron (NM intron (NM | 17458   | NM_01074  | 17096  | Lyn     | AA407514   |
| chr7  | 3897777  | 3898000  | Intergenic Intergenic | -30785  | NR_02811! | 18726  | Lilra6  | 7M1 Pira3  |
| chr3  | 27998152 | 27998400 | intron (NM intron (NM | 115183  | NM_00887  | 18805  | Pld1    | AA536939   |
| chr5  | 1.04E+08 | 1.04E+08 | intron (NM intron (NM | 72485   | NM_17874  | 246293 | Klhl8   | 2310001PC  |
| chr15 | 88906502 | 88906625 | promoter-1promoter-1  | 69      | NM_02648  | 67976  | Trabd   | 5730502D1  |
| chr16 | 84835702 | 84835825 | promoter-1promoter-1  | 56      | NM_01675  | 11957  | Atp5j   | -          |
| chr18 | 35758352 | 35758450 | promoter-1promoter-1  | 80      | NM_02642  | 67869  | Paip2   | 2310050K1  |
| chr4  | 62552202 | 62552475 | Intergenic Intergenic | -74270  | NM_02832  | 72701  | Zfp618  | 2810031P1  |
| chr10 | 92718177 | 92718275 | intron (NM intron (NM | 55678   | NM_01350  | 13713  | Elk3    | D430049E2  |
| chr2  | 1.74E+08 | 1.74E+08 | exon (NM_exon (NM_    | 129     | NM_01980  | 56491  | Vapb    | AI225786 , |
| chr1  | 1.34E+08 | 1.34E+08 | intron (NM intron (NM | 599     | NM_00879  | 18557  | Cdk18   | AA682070   |
| chr9  | 90169602 | 90169750 | Intergenic Intergenic | -4069   | NM_19433  | 67016  | Tbc1d2b | 1810061M   |
| chr6  | 52172477 | 52172600 | TTS (NM_0 TTS (NM_0   | -3966   | NM_01045  | 15404  | Hoxa7   | AV118143   |
| chr2  | 61370377 | 61370650 | Intergenic Intergenic | -46130  | NM_01152  | 21353  | Tank    | C86182 E4  |
| chr11 | 83287902 | 83287975 | intron (NM intron (NM | 1328    | NM_02742  | 70439  | Taf15   | 2610111C2  |
| chr1  | 60622927 | 60623050 | intron (NM intron (NM | 621     | NM_00104  | 77300  | Raph1   | 9430025M   |
| chr2  | 35834377 | 35834925 | intron (NM CpG        | 493     | NM_02977  | 74410  | Ttll11  | 4932702F0  |
| chr15 | 31461427 | 31461675 | promoter-1promoter-1  | -759    | NM_17260  | 223455 | 6-Mar   | 3830408GC  |
| chr11 | 3922277  | 3922425  | Intergenic RLTR45 LT  | -9434   | NM_14601  | 103655 | Sec14l4 | AI256582 , |
| chr1  | 1.83E+08 | 1.83E+08 | Intergenic ORR1C2 LT  | 7671    | NM_13370  | 69051  | Pycr2   | 1810018M   |
| chr9  | 1.22E+08 | 1.22E+08 | Intergenic Intergenic | -44171  | NM_00116  | 20623  | Snrk    | 2010012F0  |
| chr5  | 1.14E+08 | 1.14E+08 | TTS (NM_0 TTS (NM_0   | -11216  | NM_00915  | 20345  | Selplg  | CD162 Psg  |
| chr8  | 11464302 | 11464475 | intron (NM intron (NM | 14111   | NM_01122  | 19332  | Rab20   | AA536966   |
| chr19 | 33466177 | 33466425 | intron (NM CpG        | 484     | NM_00116  | 67795  | Rnls    | 6530404N2  |
| chr4  | 1.45E+08 | 1.45E+08 | intron (NM intron (NM | 106536  | NM_01130  | 20148  | Dhrs3   | Rsdrl retS |
| chr8  | 34739652 | 34739800 | exon (NM_exon (NM_    | 12722   | NM_17864  | 108159 | Ubxn8   | DOH8S2298  |
| chr7  | 88377477 | 88377775 | intron (NM intron (NM | 18936   | NM_00880  | 18584  | Pde8a   | AI551852   |
| chr17 | 43713252 | 43713575 | intron (NM intron (NM | 8013    | NM_01373  | 27226  | Pla2g7  | R75400     |
| chr6  | 21900102 | 21900250 | intron (NM CpG-11892  | 561     | NM_02362  | 71777  | Ing3    | 1300013AC  |
| chr1  | 23352552 | 23352725 | Intergenic Intergenic | 37376   | NM_00108  | 70155  | Ogfrl1  | 2210417C1  |
| chr7  | 1.48E+08 | 1.48E+08 | promoter-1promoter-1  | -503    | NM_03069  | 80876  | Ifitm2  | DSPA2c Ifi |
| chr2  | 1.27E+08 | 1.27E+08 | promoter-1promoter-1  | -104    | NM_02145  | 58800  | Trpm7   | 2310022G1  |
| chr1  | 1.56E+08 | 1.56E+08 | Intergenic BGLII_B LT | 28832   | NM_01188  | 24014  | Rnasel  | E230029I0  |
| chr17 | 47659352 | 47659625 | intron (NM intron (NM | 17488   | NM_00108  | 12445  | Ccnd3   | 9230106BC  |
| chr16 | 44136752 | 44136925 | intron (NM intron (NM | 2294    | NM_00750  | 11964  | Atp6v1a | AI647066 , |
| chr1  | 58502052 | 58502350 | 5' UTR (NM 5' UTR (NM | 129     | NM_02737  | 70225  | Ppil3   | 2310076N2  |
| chr14 | 67486552 | 67486625 | intron (NM CpG        | 849     | NM_00995  | 12934  | Dpysl2  | AI851130   |
| chr14 | 31764152 | 31764500 | promoter-1promoter-1  | -348    | NM_01184  | 23955  | Nek4    | -          |

|       |          |          |                        |         |           |        |           |            |
|-------|----------|----------|------------------------|---------|-----------|--------|-----------|------------|
| chr5  | 1.16E+08 | 1.16E+08 | exon (NM_exon (NM_     | 313     | NM_00774  | 12861  | Cox6a1    | VlaL       |
| chr7  | 1.34E+08 | 1.34E+08 | promoter-1promoter-1   | -35     | NM_02735  | 70233  | Cd2bp2    | 1500011BC  |
| chr7  | 20092777 | 20092875 | exon (NM_exon (NM_     | 854     | NM_17769  | 232946 | Bloc1s3   | BC043666   |
| chr17 | 45745402 | 45745675 | Intergenic Lx8 LINE L  | -6487   | NM_00117  | 653016 | Gm7325    | EG653016   |
| chr11 | 70189652 | 70189825 | Intergenic Intergenic  | -24205  | NM_00966  | 11687  | Alox15    | 12-LO 12/: |
| chr2  | 31427752 | 31427950 | promoter-1promoter-1   | -320    | NM_00103  | 320267 | Fubp3     | A330051M   |
| chr17 | 36407952 | 36408050 | intron (NM CpG         | 377     | NM_17828  | 79263  | Trim39    | 1100001D1  |
| chr13 | 17887777 | 17887900 | intron (NM intron (NM  | 9093    | NM_00108  | 69562  | Cdk13     | 2310015O1  |
| chr3  | 65470052 | 65470125 | promoter-1promoter-1   | -62     | NM_00103  | 624866 | Lekr1     | EG546798   |
| chr5  | 1.35E+08 | 1.35E+08 | TTS (NM_0 TTS (NM_0    | -7243   | NR_10438: | 17969  | Ncf1      | NCF-47K N  |
| chr14 | 22524777 | 22524975 | intron (NMRSINE1 SIN   | 8922    | NM_00101  | 435391 | Dupd1     | EG435391   |
| chr11 | 83084727 | 83084900 | Intergenic Intergenic  | 15415   | NM_00116  | 237890 | Slfn14    | Gm20 Slfn  |
| chr1  | 1.66E+08 | 1.66E+08 | Intergenic Intergenic  | -85327  | NM_00972  | 11931  | Atp1b1    | Atp4b Atp  |
| chr10 | 26837102 | 26837275 | intron (NM intron (NM  | 344870  | NM_17683  | 73910  | Arhgap18  | 4833419J0  |
| chr5  | 1.24E+08 | 1.24E+08 | Intergenic Intergenic  | -4998   | NM_02600  | 67151  | Psmid9    | 1500011J2  |
| chr5  | 1.15E+08 | 1.15E+08 | intron (NM intron (NM  | 7129    | NM_02201  | 63873  | Trpv4     | 0610033BC  |
| chr8  | 87549602 | 87549725 | promoter-1promoter-1   | -486    | NM_01965  | 56495  | Asna1     | 1810048H2  |
| chr13 | 95071452 | 95071575 | Intergenic Intergenic  | -16277  | NM_02915  | 107767 | Scamp1    | 4930505M   |
| chr1  | 1.45E+08 | 1.45E+08 | intron (NM intron (NM  | -17964  | NM_02002  | 26878  | B3galt2   | -          |
| chr8  | 1.27E+08 | 1.27E+08 | promoter-1promoter-1   | 252     | NM_00111  | 244666 | Sprtn     | Gm505      |
| chr1  | 55267177 | 55267250 | intron (NM MT2A LTR    | 16413   | NM_02871  | 74013  | Rftn2     | 2700010E0  |
| chr12 | 42825577 | 42826050 | intron (NM intron (NM  | -613169 | NM_01073  | 16981  | Lrrn3     | NLRR-3     |
| chr11 | 6460652  | 6460975  | intron (NM intron (NM  | 627     | NM_00119  | 216527 | Ccm2      | BC029157   |
| chr2  | 13996477 | 13996625 | promoter-1promoter-1   | 812     | NM_01148  | 20844  | Stam      | STAM1      |
| chr15 | 1.01E+08 | 1.01E+08 | intron (NM intron (NM  | -9182   | NM_00127  | 668218 | Bin2      | -          |
| chr16 | 8830702  | 8830775  | exon (NM_exon (NM_     | 545     | NM_00108  | 69053  | 1810013L2 | 1110017PC  |
| chr12 | 1.2E+08  | 1.2E+08  | intron (NM intron (NM  | 42986   | NM_17729  | 320910 | Itgb8     | 4832412OC  |
| chrX  | 45695352 | 45695525 | intron (NM CpG         | 903     | NM_17878  | 320376 | Bcorl1    | 6720425J0  |
| chr15 | 96473427 | 96473600 | promoter-1promoter-1   | -169    | NM_00116  | 105727 | Slc38a1   | AA408026   |
| chr2  | 69252902 | 69253050 | Intergenic MIRb SINE   | 34457   | NM_17551  | 241452 | Dhrs9     | C730025I0: |
| chr19 | 46945652 | 46945800 | intron (NM intron (NM  | 91115   | NM_02981  | 76952  | Nt5c2     | 2010002I2: |
| chr5  | 7980652  | 7980975  | 3' UTR (NM 3' UTR (NM  | 20341   | NM_05409  | 117167 | Steap4    | 1110021O1: |
| chr4  | 43970727 | 43970875 | intron (NM CpG         | 227     | NM_02745  | 384009 | Glipr2    | 5730414AC  |
| chr15 | 86058802 | 86058925 | intron (NM Tigger5 DN  | 13974   | NM_14547  | 223754 | Tbc1d22a  | BC023106   |
| chr4  | 1.29E+08 | 1.29E+08 | promoter-1promoter-1   | 293     | NM_02597  | 67106  | Zbtb8os   | 2010001HC  |
| chr1  | 9981827  | 9982100  | intron (NR_intron (NR_ | 17254   | NR_11097: | 69312  | Ppp1r42   | 1700011J1: |
| chr11 | 83286577 | 83286750 | promoter-1promoter-1   | 53      | NM_02742  | 70439  | Taf15     | 2610111C2  |
| chr2  | 1.04E+08 | 1.04E+08 | Intergenic Intergenic  | -12189  | NM_00114  | 16909  | Lmo2      | Rbtn-2 Rbt |
| chr4  | 1.41E+08 | 1.41E+08 | Intergenic B3 SINE B.  | -6221   | NM_00103  | 69582  | Plekhn2   | 2310034J1: |
| chr10 | 79861352 | 79861625 | intron (NM CpG         | 736     | NM_01359  | 17192  | Mbd3      | AI181826 , |
| chr9  | 57932952 | 57933175 | intron (NM intron (NM  | 16969   | NM_02921  | 382077 | Ccdc33    | 4930535E2  |
| chr3  | 87791452 | 87791625 | TTS (NM_0 TTS (NM_0    | 12740   | NM_00752  | 12032  | Bcan      | Cspg7      |
| chr7  | 1.27E+08 | 1.27E+08 | promoter-1promoter-1   | -5      | NM_02961  | 73919  | Lymr1     | 1110065L1  |
| chr17 | 46848402 | 46848575 | promoter-1promoter-1   | 76      | NM_14548  | 224824 | Pex6      | AI132582   |
| chr14 | 79790402 | 79790525 | promoter-1promoter-1   | 12      | NM_02583  | 66897  | Naa16     | 1300019CC  |
| chr5  | 1.26E+08 | 1.26E+08 | intron (NML2b LINE L   | 49256   | NM_02844  | 73121  | Fam101a   | 3110032G1  |
| chr11 | 51567127 | 51567225 | intron (NM intron (NM  | 3160    | NM_00129  | 77371  | Sec24a    | -          |

|       |          |          |                       |         |           |        |          |             |
|-------|----------|----------|-----------------------|---------|-----------|--------|----------|-------------|
| chr10 | 19311827 | 19312025 | exon (NM_exon (NM_    | 162     | NM_01051  | 15979  | Ifngr1   | CD119 IFN   |
| chr5  | 20621527 | 20621725 | Intergenic Intergenic | -60011  | NM_01120  | 19248  | Ptpn12   | P19-PTP P'  |
| chr6  | 5183852  | 5184025  | intron (NM_intron (NM | 22295   | NM_17300  | 269823 | Pon3     | 2810004E2   |
| chr17 | 29699652 | 29699800 | intron (NM_RSINE1 SIN | 12979   | NM_19864  | 381085 | Tbc1d22b | BC045600    |
| chr10 | 1.26E+08 | 1.26E+08 | intron (NM_CpG        | 1140    | NM_00111  | 52468  | Ctdsp2   | AI586070    |
| chr5  | 37221552 | 37221750 | intron (NM_intron (NM | 237     | NM_00855  | 17160  | Man2b2   | mKIAA093!   |
| chr1  | 59536752 | 59536875 | Intergenic Intergenic | -2178   | NM_00805  | 14369  | Fzd7     | Fz7         |
| chr12 | 73862477 | 73862575 | 5' UTR (NM_5' UTR (NM | 328     | NM_00891  | 19042  | Ppm1a    | 2310003C2   |
| chr8  | 73051077 | 73051325 | promoter-1promoter-1  | -441    | NM_00111  | 14232  | Fkbp8    | 38kDa FKB   |
| chr8  | 87396077 | 87396325 | promoter-1promoter-1  | 44      | NM_00116  | 71846  | Syce2    | 1700013H1   |
| chr6  | 93577177 | 93577450 | Intergenic Intergenic | 285644  | NR_104594 | 14924  | Magi1    | AIP3 BAP1   |
| chr7  | 1.34E+08 | 1.34E+08 | intron (NM_intron (NM | 554     | NM_02682  | 68742  | Tmem219  | 1110032O1   |
| chr4  | 1.01E+08 | 1.01E+08 | Intergenic Intergenic | -27289  | NM_14614  | 16451  | Jak1     | AA960307    |
| chr14 | 21613577 | 21614000 | promoter-1promoter-1  | -478    | NM_17859  | 12325  | Camk2g   | Camkg       |
| chr7  | 26429977 | 26430225 | intron (NM_intron (NM | 13679   | NM_00753  | 12039  | Bckdha   | -           |
| chr14 | 75983502 | 75983625 | exon (NM_exon (NM_    | 8229    | NM_02645  | 67926  | Spert    | 1700086NC   |
| chr13 | 52577177 | 52577325 | Intergenic Intergenic | 48954   | NM_00102  | 68203  | Diras2   | 2900052J1.  |
| chr11 | 1.02E+08 | 1.02E+08 | promoter-1promoter-1  | 33      | NM_02964  | 76547  | Tmem101  | 2610511E2   |
| chr4  | 1.34E+08 | 1.34E+08 | Intergenic Intergenic | -11469  | NM_14555  | 100017 | Ldlrap1  | AA691260    |
| chr4  | 94123552 | 94123700 | Intergenic Intergenic | 99861   | NM_02636  | 67770  | Caap1    | 5830433M    |
| chr1  | 60155252 | 60155400 | promoter-1promoter-1  | 18      | NM_00119  | 57750  | Wdr12    | 4933402C2   |
| chr6  | 66904102 | 66904575 | intron (NM_intron (NM | 57453   | NM_00117  | 14701  | Gng12    | 2010305F1   |
| chr5  | 1.4E+08  | 1.4E+08  | Intergenic MTC-int L1 | 31136   | NM_17485  | 231830 | Micall2  | A930021H:   |
| chr3  | 1.22E+08 | 1.22E+08 | intron (NM_CpG        | 306     | NM_15380  | 99480  | Dnttip2  | 4930588M    |
| chr6  | 1.17E+08 | 1.17E+08 | Intergenic Intergenic | 225173  | NM_02170  | 20315  | Cxcl12   | Pbsf Scyb1  |
| chr5  | 1.23E+08 | 1.23E+08 | promoter-1promoter-1  | 128     | NM_14491  | 231724 | Rad9b    | A630082N:   |
| chr5  | 5559302  | 5559425  | intron (NM_CpG        | 138     | NM_15311  | 207704 | Gtpbp10  | 4930545J2   |
| chr8  | 1.13E+08 | 1.13E+08 | intron (NM_intron (NM | 3961    | NM_00917  | 20444  | St3gal2  | AI429591 ,  |
| chr10 | 1.27E+08 | 1.27E+08 | Intergenic Intergenic | -2879   | NM_00928  | 20852  | Stat6    | -           |
| chr1  | 1.82E+08 | 1.82E+08 | intron (NM_intron (NM | 526     | NM_17865  | 109232 | Sccpdh   | AW214504    |
| chr3  | 89576702 | 89576900 | promoter-1promoter-1  | -730    | NM_02731  | 70093  | Ube2q1   | 1110002CC   |
| chr12 | 1.18E+08 | 1.18E+08 | exon (NM_exon (NM_    | 37651   | NM_13376  | 76044  | Ncapg2   | 5830426I0!  |
| chr13 | 37575002 | 37575100 | Intergenic Intergenic | 137837  | NM_01074  | 17084  | Ly86     | MD-1 MD1    |
| chr8  | 72826752 | 72826875 | promoter-1promoter-1  | 129     | NM_02153  | 59042  | Cope     | 1110005D1   |
| chr3  | 68360752 | 68360975 | intron (NM_L2 LINE L2 | -15427  | NM_01392  | 30953  | Schip1   | Nf2ip Schij |
| chr11 | 60643952 | 60644300 | promoter-1promoter-1  | -7      | NM_00117  | 216820 | Dhrs7b   | BC003479    |
| chr11 | 76576652 | 76577125 | intron (NM_intron (NM | 169     | NM_01681  | 53334  | Gosr1    | AI414660 ,  |
| chr6  | 1.16E+08 | 1.16E+08 | intron (NM_MIRb SINE  | 43545   | NM_00966  | 11689  | Alox5    | 5-LO 5-LO)  |
| chr8  | 81032252 | 81033025 | promoter-1promoter-1  | 189     | NM_00125  | 19656  | Rbmxl1   | Hnrpg Rbn   |
| chr7  | 75338827 | 75339025 | intron (NM_intron (NM | 70193   | NM_03010  | 78444  | Pgpep1l  | C330024D1   |
| chr19 | 5572052  | 5572225  | TTS (NM_0 TTS (NM_0   | 4064    | NM_00103  | 381201 | Ap5b1    | Gm962       |
| chr11 | 8726652  | 8726975  | Intergenic Intergenic | -162275 | NM_00108  | 319939 | Tns3     | BC023928    |
| chr2  | 48622152 | 48622275 | Intergenic B4A SINE   | -47416  | NM_00739  | 11480  | Acvr2a   | Actr1la Acv |
| chr12 | 72070002 | 72070225 | Intergenic tRNA-Lys-A | -5497   | NM_01118  | 19167  | Psma3    | Lmpc8       |
| chr10 | 75384077 | 75384150 | exon (NM_exon (NM_    | 246     | NM_01141  | 20587  | Smarchb1 | AU020204    |
| chr1  | 1.63E+08 | 1.63E+08 | Intergenic Intergenic | -17104  | NM_00745  | 11758  | Prdx6    | 1-cysPrx 9. |
| chr5  | 88983377 | 88983650 | promoter-1promoter-1  | 5       | NM_02305  | 65961  | Utp3     | 2400011KC   |

|       |          |          |            |            |         |          |        |         |            |
|-------|----------|----------|------------|------------|---------|----------|--------|---------|------------|
| chr2  | 1.03E+08 | 1.03E+08 | 3' UTR (NM | 3' UTR (NM | 25863   | NM_01012 | 13711  | Elf5    | ESE-2 ESE- |
| chr2  | 30930777 | 30930950 | intron (NM | intron (NM | 21157   | NM_00117 | 14269  | Fnbp1   | 1110057E0  |
| chr19 | 44461877 | 44461975 | Intergenic | Intergenic | 20273   | NM_00912 | 20249  | Scd1    | AA589638   |
| chr6  | 1.45E+08 | 1.45E+08 | intron (NM | MTEa LTR   | 23464   | NM_17722 | 320662 | Casc1   | A230084G:  |
| chr15 | 27713102 | 27713200 | intron (NM | intron (NM | -101854 | NM_00124 | 223433 | Fam105a | 9830126M   |
| chr13 | 94070902 | 94071150 | Intergenic | Intergenic | -3424   | NM_14717 | 26556  | Homer1  | PSD-Zip45  |
| chr4  | 19969552 | 19969625 | intron (NM | intron (NM | 389     | NM_01028 | 14590  | Ggh     | gamma-GH   |
| chr3  | 32635277 | 32635375 | promoter-1 | promoter-1 | 351     | NM_02901 | 74600  | Mrpl47  | 4833424P1  |
| chr16 | 26369202 | 26369275 | intron (NM | intron (NM | 2687    | NM_01667 | 12737  | Cldn1   | AI596271   |
| chr15 | 78893002 | 78893150 | exon (NM_  | exon (NM_  | 213     | NM_14484 | 223690 | Ankrd54 | C730048E1  |
| chr1  | 1.3E+08  | 1.3E+08  | Intergenic | Intergenic | -43158  | NM_14550 | 226414 | Dars    | 5730439G1  |
| chr16 | 36455602 | 36455875 | promoter-1 | promoter-1 | -260    | NM_02528 | 20863  | Stfa3   | Stf3       |
| chr19 | 5731202  | 5731275  | intron (NM | intron (NM | 494     | NM_02049 | 56390  | Sssca1  | 1500016H1  |
| chr17 | 35337327 | 35337475 | exon (NM_  | exon (NM_  | 1551    | NM_01369 | 21926  | Tnf     | DIF TNF-a  |
| chr5  | 91212677 | 91212800 | Intergenic | Intergenic | -2389   | NM_20332 | 330122 | Cxcl3   | Dcip1 Gm1  |
| chr13 | 55999852 | 55999950 | Intergenic | MIRb SINE  | -67115  | NM_01109 | 18740  | Pitx1   | Bft P-OTX  |
| chr11 | 62462477 | 62462550 | promoter-1 | promoter-1 | 347     | NM_17500 | 216829 | Mmgt2   | AI852046   |
| chr9  | 63563977 | 63564125 | intron (NM | intron (NM | 41750   | NM_01676 | 17127  | Smad3   | AU022421   |
| chr7  | 66485052 | 66485150 | intron (NM | intron (NM | 979     | NM_01166 | 22215  | Ube3a   | 4732496BC  |
| chrX  | 11403227 | 11403300 | Intergenic | L1MC4 LIN  | 254416  | NM_17504 | 71458  | Bcor    | 5830466J1  |
| chr11 | 1.18E+08 | 1.18E+08 | Intergenic | B4 SINE B. | -1306   | NM_00126 | 76025  | Cant1   | 5830420C2  |
| chr5  | 65906227 | 65906375 | Intergenic | Intergenic | -22199  | NM_01678 | 53323  | Ube2k   | AW492011   |
| chr7  | 1.48E+08 | 1.48E+08 | promoter-1 | promoter-1 | -479    | NM_15377 | 70552  | Lrrc56  | 5730427C2  |
| chr4  | 1.26E+08 | 1.26E+08 | promoter-1 | promoter-1 | -677    | NM_15340 | 214150 | Ago3    | AW048688   |
| chr6  | 1.16E+08 | 1.16E+08 | intron (NM | intron (NM | 2308    | NM_00966 | 11689  | Alox5   | 5-LO 5-LO) |
| chr2  | 1.29E+08 | 1.29E+08 | intron (NM | CpG        | 430     | NM_02059 | 57432  | Zc3h8   | AU020882   |
| chr2  | 38859302 | 38861325 | exon (NM_  | exon (NM_  | 338     | NM_02559 | 66489  | Rpl35   | 2410039E0  |
| chr5  | 65781252 | 65783175 | promoter-1 | promoter-1 | 457     | NM_01129 | 20005  | Rpl9    | -          |
| chr3  | 1.29E+08 | 1.29E+08 | Intergenic | Intergenic | -86470  | NM_00128 | 18741  | Pitx2   | 9430085M   |
| chr9  | 50333127 | 50333300 | intron (NM | intron (NM | 3533    | NM_01122 | 19286  | Pts     | PTPS       |
| chr17 | 34258652 | 34258725 | promoter-1 | promoter-1 | 4       | NM_01023 | 14312  | Brd2    | AW228947   |
| chr6  | 1.25E+08 | 1.25E+08 | intron (NM | intron (NM | -4012   | NM_00941 | 21991  | Tpi1    | AI255506   |
| chr7  | 87469027 | 87469350 | TTS (NM_1  | TTS (NM_1  | 152     | NM_17344 | 269955 | Rccd1   | 5830436HC  |
| chr7  | 24992377 | 24993075 | intron (NM | intron (NM | 442     | NM_01994 | 56707  | Zfp111  | -          |
| chr9  | 59386752 | 59386850 | promoter-1 | promoter-1 | -673    | NM_01042 | 15211  | Hexa    | Hex-1      |
| chr3  | 1.16E+08 | 1.16E+08 | exon (NM_  | exon (NM_  | 5193    | NM_01169 | 22329  | Vcam1   | CD106 Vca  |
| chr7  | 1.17E+08 | 1.17E+08 | promoter-1 | promoter-1 | -344    | NM_15352 | 233724 | Tmem41b | 1500015GC  |
| chr7  | 52828677 | 52828850 | intron (NM | intron (NM | 523     | NM_00124 | 12036  | Bcat2   | Bcat-2 Eca |
| chr16 | 49800502 | 49800675 | Intergenic | Intergenic | -55179  | NM_01058 | 16423  | Cd47    | 9130415E2  |
| chr10 | 74674752 | 74675050 | promoter-1 | promoter-1 | 83      | NM_15340 | 74392  | Specc1l | 4930470P1  |
| chr7  | 26004277 | 26004350 | intron (NM | CpG        | 565     | NM_20767 | 67379  | Dedd2   | 2410050E1  |
| chr12 | 1.04E+08 | 1.04E+08 | promoter-1 | promoter-1 | -583    | NM_17762 | 217835 | Rin3    | 6430500KC  |
| chr8  | 1.11E+08 | 1.11E+08 | intron (NM | intron (NM | 34269   | NM_00749 | 11906  | Zfhx3   | A230102L0  |
| chr9  | 55955902 | 55956400 | intron (NM | intron (NM | 18368   | NM_01119 | 19200  | Pstpip1 | CD2BP1 de  |
| chr1  | 1.68E+08 | 1.68E+08 | intron (NM | CpG        | 346     | NM_00100 | 68481  | Mpzl1   | 1110007A1  |
| chr9  | 86438252 | 86438425 | intron (NM | intron (NM | 27111   | NM_00116 | 109785 | Pgm3    | 2810473HC  |
| chr7  | 25292002 | 25292150 | promoter-1 | promoter-1 | -30     | NM_00129 | 232969 | Zfp428  | 2410005HC  |

|       |          |          |            |            |        |          |        |           |             |
|-------|----------|----------|------------|------------|--------|----------|--------|-----------|-------------|
| chr2  | 28695577 | 28695725 | promoter-1 | promoter-1 | 229    | NM_17297 | 269252 | Gtf3c4    | 5330400CC   |
| chr7  | 20250902 | 20251325 | promoter-1 | promoter-1 | -734   | NM_01964 | 56457  | Clptm1    | HS9 N14     |
| chr4  | 1.07E+08 | 1.07E+08 | Intergenic | CpG        | -39740 | NM_02559 | 329910 | Acot11    | 1110020M    |
| chr7  | 1.45E+08 | 1.45E+08 | intron (NM | ORR1E LTF  | 173250 | NM_18328 | 70571  | Tcerg1l   | 5730476P1   |
| chr12 | 1.14E+08 | 1.14E+08 | promoter-1 | promoter-1 | -472   | NM_02539 | 66174  | Nudt14    | 1110030M    |
| chr10 | 3592777  | 3593000  | Intergenic | RCHARR1 I  | -34948 | NM_00103 | 18390  | Oprm1     | M-OR-1 M    |
| chr4  | 32051127 | 32051250 | 5' UTR (NM | 5' UTR (NM | 106    | NM_17268 | 26409  | Map3k7    | B430101BC   |
| chr2  | 1.33E+08 | 1.33E+08 | promoter-1 | promoter-1 | 24     | NM_00102 | 66586  | Crls1     | 0610009I2:  |
| chr13 | 9158427  | 9158825  | intron (NM | intron (NM | 65475  | NM_17258 | 217980 | Larp4b    | A630096F1   |
| chr1  | 1.93E+08 | 1.93E+08 | Intergenic | Intergenic | -24368 | NM_14488 | 226849 | Ppp2r5a   | PR61alpha   |
| chr3  | 1.08E+08 | 1.08E+08 | Intergenic | Intergenic | -26651 | NM_00111 | 12977  | Csf1      | C87615 Cs   |
| chr13 | 69080152 | 69080325 | intron (NM | intron (NM | 58181  | NM_15353 | 210044 | Adcy2     | mKIAA106(   |
| chr9  | 26915052 | 26915200 | intron (NM | Lx8 LINE L | 47880  | NM_02327 | 83964  | Jam3      | 1110002N2   |
| chr11 | 99092077 | 99092200 | 5' UTR (NM | 5' UTR (NM | 193    | NM_02061 | 57376  | Smarce1   | 2810417B2   |
| chr19 | 46586152 | 46586275 | intron (NM | intron (NM | 10075  | NM_05310 | 93679  | Trim8     | AA408830    |
| chr6  | 1.35E+08 | 1.35E+08 | intron (NM | GC_rich Lc | 470    | NM_13044 | 70686  | Dusp16    | 3830417M    |
| chr4  | 1.34E+08 | 1.34E+08 | promoter-1 | promoter-1 | -88    | NM_00128 | 71904  | Paqr7     | 2310021M    |
| chr16 | 37874602 | 37874900 | intron (NM | Tigger7 DN | 6265   | NM_17709 | 320184 | Lrrc58    | 1810012N1   |
| chr9  | 41758977 | 41759150 | Intergenic | Intergenic | 173309 | NM_01143 | 20660  | Sorl1     | 2900010L1   |
| chr1  | 90173052 | 90174525 | intron (NM | CpG        | 344    | NM_17250 | 212427 | A730008H: | mFleg1      |
| chr1  | 1.54E+08 | 1.54E+08 | promoter-1 | promoter-1 | -991   | NM_00103 | 66967  | Edem3     | 2310050N1   |
| chr2  | 17985677 | 17985800 | promoter-1 | promoter-1 | -474   | NM_00125 | 17354  | Mllt10    | Af10 B130   |
| chr3  | 83880502 | 83880725 | Intergenic | MIRb SINE  | -36530 | NM_17268 | 229473 | D930015E( | Kiaa0922 r  |
| chr19 | 46471327 | 46471675 | 5' UTR (NM | 5' UTR (NM | 115    | NM_01575 | 24069  | Sufu      | Su(fu)      |
| chr6  | 1.15E+08 | 1.15E+08 | intron (NM | intron (NM | 44132  | NM_00125 | 74244  | Atg7      | 1810013K2   |
| chr15 | 25902677 | 25902800 | 3' UTR (NM | 3' UTR (NM | -11383 | NM_14452 | 52521  | Zfp622    | 1110033BC   |
| chr12 | 1.06E+08 | 1.06E+08 | promoter-1 | promoter-1 | 164    | NM_02841 | 73046  | Glr5      | 2310004O:   |
| chr15 | 42460227 | 42460400 | intron (NM | intron (NM | 48210  | NM_00128 | 11600  | Angpt1    | 1110046O:   |
| chr1  | 10028977 | 10029150 | promoter-1 | promoter-1 | 764    | NM_02649 | 211660 | Cspp1     | 2310020J1   |
| chr1  | 1.74E+08 | 1.74E+08 | intron (NM | intron (NM | 488    | NM_08041 | 140559 | Igsf8     | AA033172    |
| chr2  | 48669002 | 48669150 | promoter-1 | promoter-1 | -553   | NM_00739 | 11480  | Acvr2a    | Actrl1a Acv |
| chr1  | 52176027 | 52176675 | promoter-1 | promoter-1 | 69     | NM_00120 | 20846  | Stat1     | 2010005J0   |
| chr2  | 72314627 | 72314850 | intron (NM | CpG        | 462    | NM_02586 | 66953  | Cdca7     | 2310021G(   |
| chr1  | 66729577 | 66729650 | intron (NM | intron (NM | -17854 | NM_02568 | 66646  | Rpe       | 2810429BC   |
| chr8  | 73283877 | 73283975 | intron (NM | B1_Mur1 S  | 894    | NM_18317 | 234384 | Mpv17l2   | Fksg24      |
| chr7  | 4744352  | 4744875  | promoter-1 | promoter-1 | 46     | NM_00908 | 19943  | Rpl28     | D7Wsu21e    |
| chr2  | 81842352 | 81842625 | Intergenic | Intergenic | -51327 | NM_17551 | 241514 | Zfp804a   | C630007C1   |
| chrY  | 2879052  | 2879125  | Intergenic | L1_Mm LII  | 491830 | NM_00127 | 1E+08  | Gm3376    | Rbmy1b      |
| chr15 | 80049877 | 80050575 | Intergenic | Intergenic | -14284 | NM_17871 | 239555 | Mief1     | A230016E2   |
| chr1  | 1.37E+08 | 1.37E+08 | promoter-1 | promoter-1 | -212   | NM_01159 | 21854  | Timm17a   | 17kDa mTi   |
| chr5  | 1.13E+08 | 1.13E+08 | intron (NM | MIRc SINE  | -10139 | NM_00941 | 22022  | Tpst2     | AI448750    |
| chr16 | 38550177 | 38550375 | promoter-1 | promoter-1 | 62     | NM_17238 | 224143 | Poglut1   | 9630046K2   |
| chr9  | 20702077 | 20702150 | intron (NM | intron (NM | 921    | NM_01687 | 53356  | Eif3g     | 44kDa DOJ   |
| chr11 | 1.16E+08 | 1.16E+08 | Intergenic | Intergenic | -4165  | NM_00816 | 14784  | Grb2      | AA408164    |
| chr1  | 1.67E+08 | 1.67E+08 | promoter-1 | promoter-1 | -799   | NM_14551 | 108735 | Sft2d2    | 2010005O:   |
| chr8  | 23587302 | 23587525 | promoter-1 | promoter-1 | -62    | NM_00114 | 102032 | Smim19    | AI316807    |
| chr9  | 77503227 | 77503350 | exon (NM_  | exon (NM_  | 18749  | NM_17292 | 244923 | Klhl31    | 9830147P1   |

|       |          |          |             |             |        |           |        |           |            |
|-------|----------|----------|-------------|-------------|--------|-----------|--------|-----------|------------|
| chr7  | 20462252 | 20462425 | 3' UTR (NM  | 3' UTR (NM  | 10976  | NM_17703  | 319930 | Ceacam19  | C130022PC  |
| chrX  | 96133252 | 96133425 | 5' UTR (NM  | 5' UTR (NM  | 218    | NM_20763  | 77929  | Yipf6     | A430107JO  |
| chr14 | 70945277 | 70945450 | 5' UTR (NM  | 5' UTR (NM  | 305    | NM_18058  | 72549  | Reep4     | 2700029E1  |
| chr8  | 1.19E+08 | 1.19E+08 | intron (NM  | MIR SINE    | 105090 | NM_02944  | 75796  | Cdyl2     | 1700029M   |
| chr3  | 87689952 | 87690025 | promoter-1  | promoter-1  | -504   | NM_03357  | 94315  | Prcc      | -          |
| chr5  | 1.24E+08 | 1.24E+08 | intron (NM  | CpG         | 781    | NM_02985  | 77045  | Bcl7a     | 4432415NC  |
| chr19 | 41922727 | 41922800 | promoter-1  | promoter-1  | -141   | NM_17760  | 212398 | Frat2     | -          |
| chr5  | 64551452 | 64551625 | promoter-1  | promoter-1  | 39     | NM_01963  | 57915  | Tbc1d1    | 1110062GC  |
| chr2  | 1.52E+08 | 1.52E+08 | intron (NM  | CpG         | 237    | NM_00778  | 12995  | Csnk2a1   | Csnk2a1-rs |
| chr2  | 25066677 | 25067075 | 5' UTR (NM  | 5' UTR (NM  | 133    | NM_02139  | 58202  | Nelfb     | A730008L0  |
| chr15 | 75687777 | 75687900 | Intergenic  | Intergenic  | -4931  | NM_02696  | 69146  | Gsdmd     | 1810036L0  |
| chr1  | 95341752 | 95342150 | intron (NM  | CpG         | 327    | NM_00130  | 110611 | Hdlbp     | 1110005P1  |
| chr18 | 13107777 | 13107950 | Intergenic  | Intergenic  | -7513  | NM_20753  | 64291  | Osbpl1a   | G430090F1  |
| chr10 | 1.28E+08 | 1.28E+08 | Intergenic  | Intergenic  | -6385  | NM_17225  | 216459 | Myl6b     | 5730437E0  |
| chr9  | 1.24E+08 | 1.24E+08 | Intergenic  | MLT1A LTF   | -3222  | NM_00987  | 12581  | Cdkn2d    | INK4d p19  |
| chr1  | 67441227 | 67441425 | Intergenic  | Intergenic  | 271725 | NM_00108  | 227231 | Cps1      | 4732433M   |
| chr11 | 93769252 | 93769425 | intron (NM  | intron (NM  | 21805  | NM_13401  | 103537 | Mbtd1     | AA408199   |
| chr1  | 1.83E+08 | 1.83E+08 | Intergenic  | Intergenic  | 31764  | NM_13322  | 170760 | Acbd3     | 60kDa 843  |
| chr4  | 1.48E+08 | 1.48E+08 | Intergenic  | Intergenic  | 77934  | NM_02787  | 71707  | Ubiad1    | 1200002M   |
| chr11 | 62063027 | 62063150 | intron (NM  | intron (NM  | 602    | NM_00741  | 11541  | Adora2b   | A2BAR A2I  |
| chr3  | 5404527  | 5404875  | intron (NM  | intron (NM  | 171547 | NM_00116  | 19302  | Pex2      | D3Erttd138 |
| chr7  | 26063527 | 26063650 | Intergenic  | CpG         | -3610  | NM_00111  | 71722  | Cic       | 1200010B1  |
| chr14 | 57504352 | 57504550 | Intergenic  | CpG         | -2181  | NM_02949  | 76007  | Zmym2     | 5830413PC  |
| chr5  | 1.44E+08 | 1.44E+08 | promoter-1  | promoter-1  | 16     | NM_02837  | 72881  | Zdhhc4    | 1810021DC  |
| chr9  | 32711327 | 32711475 | Intergenic  | MIR SINE    | 207774 | NM_00103  | 23871  | Ets1      | AI196000   |
| chr9  | 1.15E+08 | 1.15E+08 | intron (NM  | intron (NM  | 842    | NM_17538  | 333433 | Gpd1l     | 2210409H2  |
| chr9  | 50606527 | 50606850 | intron (NR_ | intron (NR_ | 23358  | NR_04560: | 102580 | Alg9      | 8230402H1  |
| chr2  | 1.81E+08 | 1.81E+08 | intron (NM  | intron (NM  | 653    | NM_17376  | 228994 | Ythdf1    | 2210410K2  |
| chr8  | 23916577 | 23916775 | promoter-1  | promoter-1  | -550   | NM_00112  | 64933  | Ap3m2     | 5830445E1  |
| chr2  | 1.58E+08 | 1.58E+08 | intron (NM  | intron (NM  | -73251 | NM_19862  | 277432 | Vstm2l    | Gm691      |
| chr5  | 35917427 | 35917600 | exon (NM_   | exon (NM_   | 206    | NM_03020  | 78890  | Trmt44    | 2310079F2  |
| chr12 | 82695952 | 82696125 | promoter-1  | promoter-1  | -93    | NM_02721  | 69792  | Med6      | 1500012F1  |
| chr1  | 1.83E+08 | 1.83E+08 | intron (NR_ | CpG         | 295    | NR_12049: | 72568  | Lin9      | 2700022J2  |
| chr2  | 1.3E+08  | 1.3E+08  | Intergenic  | Intergenic  | -69313 | NM_00937  | 21818  | Tgm3      | AI893889   |
| chr2  | 1.04E+08 | 1.04E+08 | Intergenic  | Intergenic  | -11289 | NM_00114  | 16909  | Lmo2      | Rbtn-2 Rbt |
| chr2  | 1.57E+08 | 1.57E+08 | promoter-1  | promoter-1  | -227   | NM_02585  | 66934  | Dsn1      | 1700022L0  |
| chr2  | 44941252 | 44941350 | intron (NM  | intron (NM  | 24496  | NM_00128  | 24136  | Zeb2      | 9130203F0  |
| chr4  | 1.55E+08 | 1.55E+08 | promoter-1  | promoter-1  | -76    | NM_02557  | 66448  | Mrpl20    | 2610008DC  |
| chr10 | 12895602 | 12895925 | intron (NM  | intron (NM  | 2066   | NM_02917  | 75122  | Zc2hc1b   | 4930519BC  |
| chr3  | 1.35E+08 | 1.35E+08 | intron (NM  | intron (NM  | 13965  | NM_02535  | 66105  | Ube2d3    | 1100001F1  |
| chr2  | 84198902 | 84199100 | intron (NM  | intron (NM  | 66422  | NM_01878  | 54598  | Calcr1    | AV071593   |
| chr16 | 38710202 | 38710275 | intron (NM  | intron (NM  | 2910   | NM_02026  | 12549  | Arhgap31  | 5830477L0  |
| chr19 | 46402977 | 46403275 | intron (NM  | CpG         | 452    | NM_13369  | 68431  | Fbxl15    | 0710008C1  |
| chr18 | 77168802 | 77168925 | promoter-1  | promoter-1  | 97     | NM_02540  | 66191  | Ier3ip1   | 1110057H1  |
| chr9  | 13631102 | 13631175 | non-coding  | non-coding  | 359    | NR_03762: | 74360  | Cep57     | 3110002L1  |
| chr2  | 1.04E+08 | 1.04E+08 | intron (NM  | intron (NM  | 67440  | NM_00103  | 241589 | D430041D( | 9630056GC  |
| chr12 | 83240902 | 83241050 | Intergenic  | Intergenic  | -30027 | NM_00116  | 217692 | Sipa11l   | 4931426N1  |

|       |          |          |              |            |         |           |        |          |             |
|-------|----------|----------|--------------|------------|---------|-----------|--------|----------|-------------|
| chr10 | 17270502 | 17270750 | Intergenic   | L4 LINE RT | -172408 | NM_01082  | 17684  | Cited2   | AI835299 I  |
| chr9  | 22029727 | 22030025 | promoter-1   | promoter-1 | -271    | NM_17276  | 235047 | Zfp809   | BB114266    |
| chr3  | 1.22E+08 | 1.22E+08 | intron (NM   | intron (NM | 32294   | NM_00111  | 214459 | Fnbp1l   | 261031810:  |
| chr7  | 1.43E+08 | 1.43E+08 | Intergenic   | Intergenic | -19639  | NM_00108  | 17345  | Mki67    | D630048A:   |
| chr11 | 48684752 | 48685050 | promoter-1   | promoter-1 | -53     | NM_00832  | 15944  | Irgm1    | lfggd3 lfi1 |
| chr3  | 95033202 | 95033325 | promoter-1   | promoter-1 | 398     | NM_00103  | 57912  | Cdc42se1 | 1300002M    |
| chr3  | 63469177 | 63469275 | Intergenic   | Intergenic | 185687  | NM_00117  | 269437 | Plch1    | BC042549    |
| chr11 | 29926002 | 29926125 | promoter-1   | promoter-1 | -30     | NM_14601  | 237711 | Eml6     | 2900083P1   |
| chr6  | 90270577 | 90270750 | intron (NM   | intron (NM | 4516    | NM_02792  | 71797  | Chst13   | 1110067M    |
| chr7  | 35903552 | 35903650 | promoter-1   | promoter-1 | -711    | NM_00128  | 12606  | Cebpa    | C/ebpalpha  |
| chr10 | 80023752 | 80024275 | exon (NM_    | exon (NM_  | 292     | NM_02585  | 66932  | Rexo1    | 1700021P1   |
| chr7  | 78817102 | 78817250 | Intergenic   | B1F SINE   | 634305  | NM_00102  | 244049 | Mctp2    | Gm489       |
| chr5  | 1.22E+08 | 1.22E+08 | Intergenic   | Intergenic | -1828   | NM_00850  | 16923  | Sh2b3    | AI429800 I  |
| chr12 | 76393052 | 76393225 | Intergenic   | RMER19B    | -16162  | NM_02327  | 80837  | Rhoj     | 11100050:   |
| chr9  | 1.06E+08 | 1.06E+08 | promoter-1   | promoter-1 | 88      | NM_00108  | 75669  | Pik3r4   | 22100100:   |
| chr10 | 94764877 | 94765025 | intron (NM   | intron (NM | 21780   | NM_00995  | 12905  | Cradd    | RAIDD       |
| chr14 | 45657777 | 45658050 | Intergenic   | L1MB5 LIN  | 50127   | NM_00896  | 19217  | Ptger2   | EP2 Ptger   |
| chr9  | 69287677 | 69287825 | Intergenic   | Intergenic | -13739  | NM_00758  | 12306  | Anxa2    | AW215814    |
| chr14 | 79248777 | 79249225 | promoter-1   | promoter-1 | 16      | NM_17375  | 219189 | Vwa8     | 1300010F0   |
| chr15 | 57738277 | 57738550 | Intergenic   | Intergenic | -5341   | NM_00108  | 210544 | Tbc1d31  | 4B3 D330C   |
| chr10 | 1.21E+08 | 1.21E+08 | promoter-1   | promoter-1 | -416    | NM_00108  | 73192  | Xpot     | 1110004L0   |
| chr8  | 1.29E+08 | 1.29E+08 | Intergenic   | Intergenic | -2772   | NM_17276  | 52202  | Rbm34    | 4930547KC   |
| chr6  | 86535352 | 86535475 | Intergenic   | Intergenic | -42755  | NM_02641  | 67855  | Asprv1   | 2300003P2   |
| chr19 | 7115127  | 7115325  | promoter-1   | promoter-1 | -710    | NM_01673  | 20867  | Stip1    | Hop Sti1 p  |
| chr13 | 56280077 | 56280225 | promoter-1   | promoter-1 | 95      | NM_14597  | 212937 | Tifab    | -           |
| chr12 | 93038327 | 93038500 | Intergenic   | RMER30 D   | -13537  | NM_17536  | 108800 | Ston2    | 4933401N2   |
| chr9  | 61271652 | 61272000 | Intergenic   | Intergenic | 51653   | NM_00108  | 21887  | Tle3     | 2610103NC   |
| chr1  | 17598477 | 17598850 | intron (NML2 | LINE L2    | 6681    | NM_05319  | 94227  | Pi15     | P24TI P25   |
| chr15 | 98592877 | 98592950 | intron (NM   | CpG        | 636     | NM_00747  | 11842  | Arf3     | 5430400P1   |
| chr7  | 14702077 | 14702375 | intron (NM   | intron (NM | 6116    | NM_00110  | 629203 | Sult2a3  | EG629203    |
| chr6  | 1.03E+08 | 1.03E+08 | intron (NM   | intron (NM | 18343   | NM_00769  | 12661  | Chl1     | A530023M    |
| chr2  | 25477027 | 25477125 | intron (NM   | intron (NM | 446     | NM_00104  | 51875  | Tmem141  | 1110065P1   |
| chr4  | 1.21E+08 | 1.21E+08 | Intergenic   | Intergenic | -8587   | NM_00108  | 109263 | Rlf      | 9230110M    |
| chr11 | 1.11E+08 | 1.11E+08 | Intergenic   | Intergenic | 35723   | NM_00842  | 16518  | Kcnj2    | IRK1 Kcnf1  |
| chr7  | 1.04E+08 | 1.04E+08 | intron (NM   | intron (NM | 114761  | NM_00117  | 244144 | Usp35    | Gm1088 G    |
| chr17 | 31099527 | 31099725 | intron (NM   | intron (NM | 7998    | NM_17746  | 52020  | Umodl1   | D17Ert48:   |
| chr5  | 96639852 | 96639925 | intron (NM   | intron (NM | 754     | NM_05315  | 94061  | Mrpl1    | 2410002L0   |
| chr5  | 92555902 | 92556025 | Intergenic   | Intergenic | -11001  | NM_01949  | 56041  | Uso1     | 115kDa TA   |
| chr17 | 34743327 | 34743600 | intron (NM   | intron (NM | 657     | NM_00116  | 55979  | Agpat1   | 1-AGP 1-A   |
| chr6  | 55940302 | 55940400 | Intergenic   | RLTR45 LT  | -27158  | NM_01115  | 19051  | Ppp1r17  | Gsbs Ppp1   |
| chr1  | 39526002 | 39526100 | intron (NM   | intron (NM | 9541    | NM_01877  | 54610  | Tbc1d8   | AD3 HBLP:   |
| chr4  | 1.39E+08 | 1.39E+08 | intron (NM   | CpG        | 626     | NR_03374: | 433771 | Minos1   | 23100280:   |
| chr4  | 59470827 | 59470925 | Intergenic   | Zaphod DN  | -19371  | NM_00116  | 634731 | Susd1    | A530080P1   |
| chr2  | 1.53E+08 | 1.53E+08 | Intergenic   | Intergenic | 10664   | NM_19861  | 241732 | Tspyl3   | AW212607    |
| chr10 | 41023052 | 41023200 | promoter-1   | promoter-1 | -79     | NM_13399  | 103199 | Fig4     | A530089I1   |
| chr3  | 68960352 | 68960425 | intron (NM   | intron (NM | 25233   | NM_00124  | 381452 | Gm1647   | -           |
| chr8  | 1.26E+08 | 1.26E+08 | promoter-1   | promoter-1 | -128    | NM_19444  | 234854 | Cdk10    | BC017131    |



|       |          |          |                       |         |           |        |          |            |
|-------|----------|----------|-----------------------|---------|-----------|--------|----------|------------|
| chr1  | 1.84E+08 | 1.84E+08 | exon (NM_exon (NM_    | 211     | NM_17512  | 67948  | Fbxo28   | 4833428J1  |
| chr16 | 18426177 | 18426625 | promoter-1promoter-1  | -109    | NM_01371  | 26462  | Txnrd2   | AA118373   |
| chr1  | 54894677 | 54894975 | intron (NM_intron (NM | 88405   | NM_00108  | 329154 | Ankrd44  | 4930444A1  |
| chrX  | 1.48E+08 | 1.48E+08 | promoter-1promoter-1  | -513    | NM_01676  | 15108  | Hsd17b10 | 17bHSD10   |
| chr7  | 27980327 | 27980500 | promoter-1promoter-1  | 366     | NM_00104  | 53607  | Snrpa    | C430021M   |
| chr11 | 72775077 | 72775175 | intron (NM_intron (NM | 455     | NM_00116  | 53313  | Atp2a3   | SERCA3b S  |
| chr3  | 1.04E+08 | 1.04E+08 | exon (NM_exon (NM_    | 191     | NM_00102  | 269473 | Lrig2    | 46324191I  |
| chr10 | 6547702  | 6547850  | intron (NM_intron (NM | 58388   | NM_00115  | 213783 | Plekhg1  | D10ErtD73: |
| chr6  | 29195752 | 29195825 | Intergenic Intergenic | -26700  | NM_00119  | 69573  | Hilpda   | 2310016CC  |
| chr2  | 22908302 | 22908450 | Intergenic Intergenic | -12615  | NM_14599  | 11308  | Abi1     | E3B1 NAP:  |
| chr7  | 75276477 | 75276575 | intron (NM_intron (NM | 132593  | NM_03010  | 78444  | Pgpep1l  | C330024D1  |
| chr11 | 1.06E+08 | 1.06E+08 | promoter-1promoter-1  | -170    | NM_02600  | 67163  | Ccdc47   | 2610204L2  |
| chr18 | 74938827 | 74938975 | promoter-1promoter-1  | 35      | NM_17747  | 52538  | Acaa2    | 0610011L0  |
| chr4  | 1.25E+08 | 1.25E+08 | intron (NM_ID_B1 SINI | 11402   | NM_13868  | 192199 | Rspo1    | R-spondin  |
| chr10 | 96118827 | 96119025 | Intergenic Intergenic | 39291   | NM_00756  | 12226  | Btg1     | AI426953 , |
| chr10 | 87880302 | 87880400 | intron (NM_intron (NM | 38194   | NM_00100  | 432486 | Gnptab   | EG432486   |
| chr2  | 1.74E+08 | 1.74E+08 | intron (NR_CpG-8954   | 1073    | NR_003258 | 14683  | Gnas     | 5530400H2  |
| chr18 | 42974527 | 42974600 | intron (NM_MTB LTR I  | 84597   | NR_073583 | 72930  | Ppp2r2b  | 2900026HC  |
| chr8  | 36438577 | 36438650 | promoter-1promoter-1  | -182    | NM_17774  | 244416 | Ppp1r3b  | 6430576E2  |
| chr11 | 1.15E+08 | 1.15E+08 | intron (NM_intron (NM | 18993   | NM_00116  | 58222  | Rab37    | B230331O(  |
| chr9  | 61223827 | 61224000 | intron (NM_intron (NM | 3740    | NM_00108  | 21887  | Tle3     | 2610103NC  |
| chr5  | 1.07E+08 | 1.07E+08 | intron (NM_CpG        | 473     | NM_02685  | 52397  | Zfp644   | 1110068L0  |
| chr3  | 1.09E+08 | 1.09E+08 | Intergenic RCHARR1 I  | -13488  | NM_00116  | 329739 | Fam102b  | 1600010D1  |
| chr6  | 47404377 | 47404450 | promoter-1promoter-1  | 90      | NM_01204  | 26965  | Cul1     | -          |
| chr2  | 1.44E+08 | 1.44E+08 | intron (NM_intron (NM | 971     | NM_01977  | 56431  | Dstn     | 2610043P1  |
| chr10 | 42682527 | 42682625 | Intergenic Intergenic | 102258  | NM_17293  | 268297 | Scml4    | 9330161D1  |
| chr10 | 43297552 | 43297625 | Intergenic Intergenic | -1387   | NM_00984  | 12484  | Cd24a    | Cd24 HSA   |
| chr17 | 57997602 | 57997700 | intron (NM_intron (NM | 88658   | NM_00108  | 620292 | Cntnap5c | Caspr5-3 E |
| chr17 | 31353102 | 31353250 | intron (NM_MLT1C LTF  | 8165    | NM_17782  | 328795 | Ubash3a  | 5830413CC  |
| chr8  | 1.23E+08 | 1.23E+08 | Intergenic Intergenic | -119978 | NM_19867  | 382034 | Gse1     | 22100131I: |
| chr8  | 34762852 | 34763100 | promoter-1promoter-1  | -734    | NM_01034  | 14782  | Gsr      | AI325518 I |
| chr4  | 1.41E+08 | 1.41E+08 | intron (NM(TA)n Simf  | 771     | NM_00101  | 68817  | Ddi2     | 1110056G1  |
| chr15 | 36936677 | 36936775 | intron (NM_CpG        | 431     | NM_02652  | 68036  | Zfp706   | 3110006PC  |
| chr1  | 1.93E+08 | 1.93E+08 | intron (NM_B3 SINE B: | 16575   | NM_17863  | 77065  | Ints7    | 5930412E2  |
| chr15 | 98863652 | 98863775 | intron (NM_intron (NM | 3391    | NM_00944  | 22146  | Tuba1c   | M[a]6 Tub  |
| chr13 | 43345927 | 43346000 | intron (NM_intron (NM | 53578   | NM_00103  | 328232 | Gfod1    | 9630032O1  |
| chr1  | 36353977 | 36354100 | Intergenic Intergenic | -10540  | NM_00129  | 214855 | Arid5a   | D430024K2  |
| chr11 | 23206927 | 23207150 | intron (NM_CpG-1773   | 143     | NM_00119  | 17847  | Usp34    | A530081CC  |
| chr4  | 9609852  | 9610200  | Intergenic MTEb LTR   | -13535  | NM_00129  | 65973  | Asph     | 2310005F1  |
| chr15 | 78551002 | 78551275 | Intergenic Intergenic | -2595   | NM_18314  | 207393 | Elfn2    | 6330514E1  |
| chr1  | 75518127 | 75518250 | promoter-1promoter-1  | 84      | NM_02788  | 71728  | Stk11ip  | 1200014D2  |
| chr1  | 1.69E+08 | 1.69E+08 | intron (NM_intron (NM | 540     | NM_02556  | 66447  | Mgst3    | 2010012L1  |
| chr13 | 98862702 | 98862850 | intron (NM_intron (NM | 113344  | NM_01202  | 110596 | Arhgef28 | 9230110L0  |
| chr12 | 35063502 | 35063750 | intron (NM_intron (NM | 150128  | NM_02412  | 79221  | Hdac9    | AV022454   |
| chr7  | 1.29E+08 | 1.29E+08 | intron (NM_intron (NM | -18819  | NM_00103  | 233824 | Cog7     | 5630400E2  |
| chr19 | 45734352 | 45734650 | exon (NM_exon (NM_    | 182     | NM_01390  | 30838  | Fbxw4    | Dac Fbw4   |
| chr8  | 1.2E+08  | 1.2E+08  | intron (NM_intron (NM | 2569    | NM_00116  | 74440  | Cmip     | 4933407CC  |

|       |          |          |                      |            |         |          |        |           |             |
|-------|----------|----------|----------------------|------------|---------|----------|--------|-----------|-------------|
| chr10 | 93605327 | 93605525 | 3' UTR (NM           | 3' UTR (NM | -5250   | NM_01162 | 22025  | Nr2c1     | 4831444HC   |
| chr5  | 53174277 | 53174425 | promoter-1           | promoter-1 | 45      | NM_03018 | 78796  | Zcchc4    | 4930449I2:  |
| chr5  | 33695127 | 33695350 | intron (NML1MB7 LIN  |            | 17017   | NM_02150 | 59003  | Maea      | 1110030D1   |
| chr5  | 1.23E+08 | 1.23E+08 | intron (NM           | intron (NM | 463     | NM_00128 | 59008  | Anapc5    | 2510006G1   |
| chr5  | 73304952 | 73305100 | promoter-1           | promoter-1 | -575    | NM_00111 | 75991  | Slain2    | 5033405K1   |
| chr16 | 45148977 | 45149075 | intron (NM           | intron (NM | 9760    | NM_02875 | 74102  | Slc35a5   | 1010001J0   |
| chr13 | 77274452 | 77274625 | promoter-1           | promoter-1 | 191     | NM_13407 | 105377 | Ankrd32   | 2700017AC   |
| chr6  | 90687027 | 90687100 | intron (NM           | CpG        | -20540  | NM_00113 | 232227 | Iqsec1    | AW561907    |
| chr5  | 1.18E+08 | 1.18E+08 | intron (NM           | CpG        | 309     | NM_14556 | 231670 | Fbxo21    | 2810425J2   |
| chr2  | 1.07E+08 | 1.07E+08 | intron (NM           | intron (NM | 1241    | NM_00102 | 212772 | Arl14ep   | 2700007P2   |
| chr6  | 1.15E+08 | 1.15E+08 | Intergenic           | Intergenic | -25196  | NM_19903 | 381802 | Tsen2     | AU067695    |
| chr3  | 54611877 | 54612475 | promoter-1           | promoter-1 | -463    | NM_13323 | 170767 | Rfxap     | 5730495K2   |
| chr14 | 75579752 | 75579825 | intron (NM           | intron (NM | 43556   | NM_00887 | 18826  | Lcp1      | AW536232    |
| chr15 | 63831877 | 63832000 | intron (NM           | (TG)n Simf | 60072   | NM_14484 | 223601 | Fam49b    | 0910001AC   |
| chr5  | 44617627 | 44617700 | exon (NM_            | exon (NM_  | 182     | NM_17376 | 231225 | Tapt1     | 4932414K1   |
| chr11 | 80606952 | 80607250 | Intergenic           | MER20 DN   | -13574  | NM_17739 | 338367 | Myo1d     | 9930104HC   |
| chr10 | 58122452 | 58122525 | intron (NM           | intron (NM | 15956   | NM_01010 | 13608  | Edar      | ED1R ED3    |
| chr6  | 50256652 | 50257000 | intron (NM           | intron (NM | -45058  | NM_01876 | 54722  | Dfna5     | 2310037DC   |
| chr11 | 78159227 | 78159325 | intron (NM           | intron (NM | 2252    | NM_01167 | 22248  | Unc119    | D11Bhm52    |
| chr13 | 37749177 | 37749400 | Intergenic           | Intergenic | -168619 | NM_02683 | 68750  | Rreb1     | 1110037NC   |
| chr13 | 1.01E+08 | 1.01E+08 | promoter-1           | promoter-1 | -122    | NM_01142 | 20595  | Smn1      | AI849087 I  |
| chr12 | 1.04E+08 | 1.04E+08 | intron (NM           | intron (NM | 344     | NM_01117 | 19141  | Lgmn      | AEP AI746   |
| chr3  | 97419827 | 97420150 | Intergenic           | Intergenic | -5875   | NM_02653 | 68058  | Chd1l     | 4432404A2   |
| chr9  | 1.08E+08 | 1.08E+08 | intron (NM           | CpG        | 168     | NM_03254 | 84585  | Rnf123    | BC003945    |
| chr3  | 95622402 | 95622625 | exon (NM_            | exon (NM_  | 363     | NM_00108 | 75137  | Rprd2     | 2810036A1   |
| chrX  | 1.31E+08 | 1.31E+08 | intron (NMB3 SINE B. |            | -45281  | NM_01007 | 13497  | Drp2      | AW495265    |
| chr7  | 1.48E+08 | 1.48E+08 | Intergenic           | Intergenic | 12717   | NM_02537 | 66141  | Ifitm3    | 1110004CC   |
| chr4  | 53133102 | 53133325 | intron (NM           | intron (NM | 39554   | NM_01345 | 11303  | Abca1     | ABC-1 Abc   |
| chr5  | 1.11E+08 | 1.11E+08 | intron (NM           | intron (NM | 25548   | NM_02933 | 75560  | Ep400     | 1700020J0   |
| chr17 | 56092002 | 56092175 | promoter-1           | promoter-1 | 42      | NM_01576 | 50498  | Ebi3      | EBI-3 IL-27 |
| chr16 | 48709952 | 48710125 | Intergenic           | Intergenic | 62031   | NM_19829 | 77647  | Trat1     | C030046M    |
| chr8  | 97541477 | 97542325 | intron (NM           | intron (NM | 309     | NM_17303 | 54672  | Gpr97     | A030001G:   |
| chr12 | 73805052 | 73805375 | Intergenic           | Intergenic | -39398  | NM_02552 | 66375  | Dhrs7     | 2310016E2   |
| chr1  | 53831002 | 53831100 | intron (NM           | intron (NM | 11008   | NM_13381 | 98267  | Stk17b    | 3110009AC   |
| chr2  | 72887152 | 72887650 | Intergenic           | Intergenic | -68898  | NM_00101 | 20687  | Sp3       | D130027J0   |
| chr4  | 49251027 | 49251250 | intron (NM           | intron (NM | 169885  | NM_14536 | 209186 | Acnat2    | C730036D1   |
| chr11 | 1.18E+08 | 1.18E+08 | Intergenic           | (CACCAT)n  | -30273  | NM_02791 | 71776  | Tha1      | 1300017KC   |
| chr11 | 77845377 | 77846025 | promoter-1           | promoter-1 | -114    | NM_18328 | 70451  | Dhrs13    | 2610209N1   |
| chr4  | 11413077 | 11413300 | promoter-1           | promoter-1 | 83      | NM_00108 | 66185  | 1110037F0 | 4930422M    |
| chr12 | 1.14E+08 | 1.14E+08 | intron (NM           | CpG        | 374     | NM_00116 | 11651  | Akt1      | Akt PKB P   |
| chr8  | 54690502 | 54690625 | intron (NM           | intron (NM | 33856   | NM_14620 | 234258 | Neil3     | AI449477    |
| chr16 | 30595777 | 30595875 | Intergenic           | Intergenic | -3983   | NM_17763 | 224093 | Fam43a    | Tuf1        |
| chr12 | 59826977 | 59827400 | Intergenic           | Lx8 LINE L | 285816  | NM_00914 | 20334  | Sec23a    | Msec23 Se   |
| chr11 | 61562802 | 61562950 | intron (NM           | intron (NM | 12714   | NM_14480 | 212627 | Prpsap2   | A230054F2   |
| chr5  | 44190802 | 44191100 | Intergenic           | Intergenic | -17563  | NM_17872 | 242960 | Fbxl5     | Fbl4 Fir4   |
| chr16 | 38616752 | 38616850 | intron (NM           | intron (NM | 53874   | NM_02640 | 67846  | Tmem39a   | 2610033CC   |
| chr10 | 87694227 | 87694425 | intron (NM           | intron (NM | 30484   | NM_02748 | 67282  | Ccdc53    | 2900091E1   |

|       |          |          |             |             |         |           |        |            |            |
|-------|----------|----------|-------------|-------------|---------|-----------|--------|------------|------------|
| chr4  | 80198802 | 80198875 | Intergenic  | Intergenic  | -281279 | NM_03120  | 22178  | Tyrp1      | Oca3 TRP-  |
| chr19 | 23210552 | 23210975 | Intergenic  | CpG         | -4953   | NM_01063  | 16601  | Klf9       | 2310051E1  |
| chr18 | 78035102 | 78035325 | intron (NM  | intron (NM  | 1924    | NM_01383  | 19201  | Pstpip2    | MAYP cmc   |
| chr11 | 3068027  | 3068150  | intron (NM  | RLTR21 LT   | 25378   | NM_03020  | 78887  | Sfi1       | -          |
| chr10 | 84121252 | 84121400 | intron (NM  | intron (NM  | 36144   | NM_02742  | 70428  | Polr3b     | 2700078HC  |
| chr1  | 89110277 | 89110775 | promoter-1  | promoter-1  | 12      | NM_00103  | 26987  | Eif4e2     | 2700069E0  |
| chr1  | 37486927 | 37487250 | promoter-1  | promoter-1  | 71      | NM_02612  | 67387  | Unc50      | 1110002A2  |
| chr5  | 1.29E+08 | 1.29E+08 | intron (NM  | intron (NM  | 16871   | NM_00128  | 13852  | Stx2       | AW538950   |
| chr1  | 72372652 | 72373050 | exon (NM_   | exon (NM_   | 18856   | NM_00953  | 22596  | Xrcc5      | AI314015 I |
| chr1  | 1.35E+08 | 1.35E+08 | intron (NM  | intron (NM  | 22377   | NM_17544  | 214253 | Etnk2      | 4933417N2  |
| chr12 | 3427202  | 3427325  | promoter-1  | promoter-1  | 406     | NM_17242  | 75302  | Asxl2      | 4930556B1  |
| chr4  | 9037027  | 9037125  | Intergenic  | MER53 DN    | -159388 | NM_02894  | 74438  | Clvs1      | 4933402J2  |
| chr9  | 95412102 | 95412350 | intron (NM  | CpG         | 189     | NM_02647  | 67958  | U2surp     | 2610101N1  |
| chr7  | 53098427 | 53098550 | intron (NM  | RMER15-in   | -12329  | NM_15341  | 101612 | Grwd1      | A301 AI50  |
| chr5  | 1.39E+08 | 1.39E+08 | promoter-1  | promoter-1  | -297    | NM_03056  | 80752  | Fam20c     | C76981 DN  |
| chr18 | 60933727 | 60935575 | intron (NM  | CpG         | 401     | NM_02060  | 20044  | Rps14      | 2600014J0  |
| chr1  | 1.01E+08 | 1.01E+08 | Intergenic  | Intergenic  | 303525  | NM_02758  | 70866  | Slco6d1    | 4921511I0! |
| chr9  | 89937702 | 89938050 | Intergenic  | MLT1E2 LT   | -11229  | NM_00780  | 13036  | Ctsh       | AL022844   |
| chr1  | 1.35E+08 | 1.35E+08 | Intergenic  | Intergenic  | -1855   | NM_13381  | 108954 | Ppp1r15b   | 1810033K1  |
| chr8  | 1.1E+08  | 1.1E+08  | promoter-1  | promoter-1  | 90      | NM_02555  | 66427  | Cyb5b      | 1810044O2  |
| chr1  | 10029952 | 10030100 | intron (NM  | CpG         | 1727    | NM_02649  | 211660 | Cspp1      | 2310020J1  |
| chr10 | 1.17E+08 | 1.17E+08 | promoter-1  | promoter-1  | -358    | NM_17779  | 327826 | Frs2       | 4732458E1  |
| chr10 | 90645227 | 90645525 | Intergenic  | Intergenic  | -11012  | NM_00108  | 21917  | Tmpo       | 5630400D2  |
| chr4  | 43058227 | 43058325 | intron (NR_ | intron (NR_ | 816     | NR_04556: | 230088 | Fam214b    | B230312A2  |
| chr4  | 11893552 | 11893750 | promoter-1  | promoter-1  | -54     | NM_00103  | 381511 | Pdp1       | Gm1024 P   |
| chrX  | 1.52E+08 | 1.52E+08 | Intergenic  | L1_Mus3 L   | -356818 | NM_00109  | 211612 | Ptchd1     | 9630036J2  |
| chr1  | 1.22E+08 | 1.22E+08 | intron (NM  | MER58B D    | -18099  | NM_14550  | 226352 | Epb4.1I5   | 1700030C1  |
| chr16 | 4790002  | 4790075  | promoter-1  | promoter-1  | -103    | NM_02567  | 66626  | Cdip1      | 2700048O1  |
| chr7  | 87976352 | 87976575 | Intergenic  | RLTR19-int  | -28246  | NM_01672  | 29875  | Iqgap1     | AA682088   |
| chr15 | 64553327 | 64553475 | intron (NM  | intron (NM  | 200457  | NM_00129  | 11514  | Adcy8      | AC8 AW06   |
| chr17 | 47314577 | 47314675 | intron (NM  | intron (NM  | 36735   | NM_00109  | 224829 | Trerf1     | 9430096I1! |
| chr7  | 1.09E+08 | 1.09E+08 | promoter-1  | promoter-1  | -166    | NR_11193! | 233575 | Pgap2      | 1810006G2  |
| chr6  | 72222377 | 72222500 | Intergenic  | Intergenic  | -32166  | NM_00128  | 20388  | Sftpb      | AI562151 ! |
| chr2  | 28554252 | 28554400 | intron (NM  | MIR SINE    | 845     | NM_02728  | 69987  | 1700026L0  | MAST       |
| chr7  | 1.18E+08 | 1.18E+08 | intron (NM  | intron (NM  | 1118    | NM_00104  | 13690  | Eif4g2     | AA589388   |
| chr7  | 1.25E+08 | 1.25E+08 | Intergenic  | Lx8 LINE L  | 316920  | NM_17564  | 233781 | Xylt1      | 8030490L1  |
| chr11 | 1.06E+08 | 1.06E+08 | intron (NM  | intron (NM  | 25043   | NM_17239  | 67803  | Limd2      | 0610025L0  |
| chr10 | 84048202 | 84048325 | intron (NM  | intron (NM  | 8571    | NM_14600  | 216198 | Tcp11I2    | E430026E1  |
| chr5  | 1.4E+08  | 1.4E+08  | intron (NM  | intron (NM  | -1215   | NM_17700  | 319772 | C1300500:- |            |
| chr4  | 1.15E+08 | 1.15E+08 | intron (NM  | RSINE1 SIN  | 807     | NM_02564  | 66588  | Cmpk1      | 0610011DC  |
| chr7  | 1.24E+08 | 1.24E+08 | intron (NM  | Kanga1 DN   | 11230   | NM_00113  | 53322  | Nucb2      | AI607786 ! |
| chr4  | 91031177 | 91031475 | intron (NM  | intron (NM  | 7420    | NM_01048  | 15569  | Elavl2     | Hub mel-N  |
| chr2  | 84224127 | 84224225 | intron (NM  | Lx8 LINE L  | 41247   | NM_01878  | 54598  | Calcr1     | AV071593   |
| chr1  | 1.74E+08 | 1.74E+08 | Intergenic  | Intergenic  | -11597  | NM_00853  | 17085  | Ly9        | AI893573 ! |
| chr7  | 53229552 | 53229650 | Intergenic  | L2 LINE L2  | 45833   | NM_00103  | 211535 | Ccdc114    | -          |
| chr3  | 1.27E+08 | 1.27E+08 | intron (NM  | intron (NM  | 11157   | NM_02780  | 71481  | Alpk1      | 8430410J1! |
| chr1  | 52687777 | 52687850 | intron (NR_ | intron (NR_ | 264     | NM_00114  | 227094 | Tmem194!   | 5330401PC  |

|       |          |          |            |            |         |          |        |             |             |
|-------|----------|----------|------------|------------|---------|----------|--------|-------------|-------------|
| chr10 | 76978727 | 76978925 | promoter-1 | promoter-1 | -268    | NM_13399 | 108707 | Fam207a     | 1810008A1   |
| chr7  | 73279102 | 73279550 | intron (NM | intron (NM | 24925   | NM_00108 | 269941 | Chsy1       | mKIAA0990   |
| chr5  | 1.41E+08 | 1.41E+08 | Intergenic | Intergenic | -4662   | NM_02152 | 59031  | Chst12      | AI595374 I  |
| chr1  | 89753327 | 89753400 | intron (NM | ID_B1 SINI | 3501    | NM_17764 | 227333 | Dgkd        | AI841987 I  |
| chr16 | 13672052 | 13672450 | intron (NM | CpG        | 138     | NM_02565 | 66598  | 3110001I2:- |             |
| chr6  | 82691502 | 82691650 | intron (NM | intron (NM | 32872   | NM_01382 | 15277  | Hk2         | AI642394 I  |
| chr9  | 7593502  | 7593575  | Intergenic | Intergenic | 22080   | NM_00103 | 234911 | Mmp27       | Gm180       |
| chr12 | 74880327 | 74880575 | Intergenic | Intergenic | -128403 | NM_01043 | 15251  | Hif1a       | AA959795    |
| chr5  | 43508227 | 43508475 | Intergenic | Intergenic | -116351 | NM_17593 | 231207 | Cpeb2       | A630055H:   |
| chr9  | 1.07E+08 | 1.07E+08 | intron (NM | intron (NM | -17057  | NM_02910 | 74840  | Manf        | 3230402M    |
| chr2  | 89474452 | 89474525 | Intergenic | Intergenic | -3435   | NM_00101 | 257984 | Olfr1249    | MOR231-1    |
| chr12 | 1.05E+08 | 1.05E+08 | intron (NM | intron (NM | 3822    | NM_00924 | 20702  | Serpina1c   | Pi3 Pi6 Sk: |
| chr7  | 1.35E+08 | 1.35E+08 | intron (NM | intron (NM | 4256    | NM_02133 | 16411  | Itgax       | AI449405 I  |
| chr6  | 1.35E+08 | 1.35E+08 | Intergenic | MTD LTR I  | -1143   | NM_01354 | 15199  | Hebp1       | Hebp        |
| chr2  | 73322927 | 73323075 | intron (NM | intron (NM | 809     | NM_00128 | 215280 | Wipf1       | AI115543 I  |
| chr8  | 1.24E+08 | 1.24E+08 | promoter-1 | promoter-1 | -144    | NM_14560 | 234825 | Klhdc4      | AA408426    |
| chr14 | 22818927 | 22819200 | Intergenic | MLT1J LTR  | -10240  | NM_14545 | 218820 | Zfp503      | AI181838 I  |
| chr13 | 16335002 | 16335525 | Intergenic | Intergenic | 228955  | NM_00838 | 16323  | Inhba       | -           |
| chr6  | 1.13E+08 | 1.13E+08 | 5' UTR (NM | 5' UTR (NM | 120     | NM_00128 | 78783  | Brpf1       | 4833438B1   |
| chr10 | 1.12E+08 | 1.12E+08 | promoter-1 | promoter-1 | -231    | NM_00103 | 382423 | Atxn7l3b    | 4921506J0   |
| chr1  | 1.73E+08 | 1.73E+08 | exon (NM_  | exon (NM_  | 4029    | NM_02057 | 57370  | B4galt3     | 9530061M    |
| chr16 | 24363652 | 24363725 | Intergenic | L3 LINE Cf | -29748  | NM_17866 | 210126 | Lpp         | 9430020K1   |
| chr12 | 32745777 | 32745950 | exon (NM_  | exon (NM_  | 281     | NM_01115 | 19088  | Prkar2b     | AI451071 ,  |
| chr1  | 1.73E+08 | 1.73E+08 | 5' UTR (NM | 5' UTR (NM | 337     | NM_01161 | 21945  | Dedd        | CASP8IP1 I  |
| chr1  | 1.73E+08 | 1.73E+08 | Intergenic | CpG        | 19219   | NM_14455 | 246256 | Fcgr4       | 4833442P2   |
| chr15 | 63479727 | 63479875 | Intergenic | Intergenic | 160493  | NM_03137 | 83492  | Gsdmc       | Gsdmc1 M    |
| chr1  | 1.27E+08 | 1.27E+08 | promoter-1 | promoter-1 | -730    | NM_02878 | 74150  | Slc35f5     | 1300003P1   |
| chr4  | 1.55E+08 | 1.55E+08 | promoter-1 | promoter-1 | 467     | NM_20722 | 140500 | Acap3       | Centb5 Kia  |
| chr1  | 36565752 | 36566100 | TTS (NM_0  | TTS (NM_0  | -2795   | NM_00103 | 94218  | Cnm3        | Acdp3 Clp:  |
| chr8  | 1.23E+08 | 1.23E+08 | Intergenic | URR1B DN   | -15163  | NM_17885 | 272551 | Gins2       | 22100131I:  |
| chr1  | 82793727 | 82793875 | Intergenic | MLT1A1 L1  | -28770  | NM_02545 | 66261  | Tm4sf20     | 1810018L0   |
| chr2  | 26459227 | 26459625 | intron (NM | CpG        | 511     | NM_02621 | 67512  | Agpat2      | 2510002J0   |
| chr11 | 12758152 | 12758500 | Intergenic | Intergenic | -393363 | NM_00128 | 12808  | Cobl        | -           |
| chr5  | 1.01E+08 | 1.01E+08 | promoter-1 | promoter-1 | 91      | NM_17240 | 70681  | Fam175a     | 3830405G0   |
| chr4  | 6284477  | 6284650  | Intergenic | Intergenic | -8264   | NM_01680 | 53378  | Sdcbp       | MDA-9 Syc   |
| chr6  | 86354427 | 86354625 | intron (NM | CpG        | 313     | NM_00116 | 21841  | Tia1        | 2310050N0   |
| chr6  | 38249102 | 38249175 | exon (NM_  | exon (NM_  | 121     | NM_17246 | 209032 | Zc3hav1l    | B130055L0   |
| chr7  | 54311552 | 54311900 | Intergenic | Intergenic | 5716    | NM_02643 | 67893  | Tmem86a     | 1810054O1   |
| chr17 | 24327927 | 24328150 | intron (NM | PB1D10 SI  | 8864    | NM_00116 | 224617 | Tbc1d24     | 9630033P1   |
| chr5  | 1.34E+08 | 1.34E+08 | Intergenic | Intergenic | -569825 | NM_17704 | 319974 | Auts2       | 2700063G0   |
| chr12 | 13605327 | 13605800 | Intergenic | Intergenic | 329630  | NM_02770 | 71169  | Nbas        | 4933425L0   |
| chr2  | 26788152 | 26788275 | intron (NM | intron (NM | 818     | NM_01151 | 20932  | Surf4       | AL033340    |
| chr10 | 29081577 | 29081675 | intron (NM | CpG        | 622     | NM_02651 | 68031  | Rnf146      | 2610509H2   |
| chr5  | 28118427 | 28118550 | promoter-1 | promoter-1 | -398    | NM_01887 | 55982  | Paxip1      | D5Erttd149: |
| chr8  | 27126052 | 27126400 | promoter-1 | promoter-1 | -153    | NM_00803 | 14272  | Fnta        | FTA         |
| chr5  | 1.35E+08 | 1.35E+08 | intron (NM | intron (NM | 208     | NM_02447 | 79565  | Wbscr27     | AW492986    |
| chr4  | 1.16E+08 | 1.16E+08 | promoter-1 | promoter-1 | -43     | NM_00112 | 19366  | Rad54l      | RAD54       |

|       |          |          |             |            |         |           |        |          |            |
|-------|----------|----------|-------------|------------|---------|-----------|--------|----------|------------|
| chr17 | 35394827 | 35395000 | Intergenic  | RMER15 L   | -5126   | NM_01038  | 14964  | H2-D1    | H-2D H2-D  |
| chr7  | 86611452 | 86611775 | promoter-1  | promoter-1 | -454    | NM_01746  | 18975  | Polg     | AA409516   |
| chr14 | 21522002 | 21522350 | promoter-1  | promoter-1 | -73     | NM_02536  | 66121  | Chchd1   | 111000101  |
| chr4  | 1.34E+08 | 1.34E+08 | intron (NM  | intron (NM | 49754   | NM_20723  | 230815 | Man1c1   | AI593348   |
| chr11 | 97141427 | 97141650 | exon (NM_   | exon (NM_  | 352     | NM_00894  | 19155  | Npepps   | AAP-S MP:  |
| chr1  | 58851877 | 58852025 | promoter-1  | promoter-1 | -267    | NM_00981  | 12370  | Casp8    | CASP-8 FLI |
| chr2  | 72875952 | 72876050 | Intergenic  | Intergenic | -57498  | NM_00101  | 20687  | Sp3      | D130027J0  |
| chrX  | 69061502 | 69061575 | promoter-1  | promoter-1 | 119     | NM_00129  | 67048  | Vma21    | 2610030HC  |
| chr2  | 25121602 | 25121750 | intron (NM  | intron (NM | 3558    | NM_17528  | 97031  | Tprn     | C430004E1  |
| chr15 | 76173752 | 76173925 | promoter-1  | promoter-1 | -115    | NM_02556  | 66445  | Cyc1     | 2610002H1  |
| chr15 | 9968827  | 9968925  | Intergenic  | Intergenic | -138117 | NM_01116  | 19116  | Prlr     | AI987712 I |
| chr10 | 59740277 | 59740400 | promoter-1  | promoter-1 | -38     | NM_00114  | 19156  | Psap     | AI037048 : |
| chr10 | 85334102 | 85334450 | promoter-1  | promoter-1 | -300    | NM_13399  | 103136 | Pwp1     | 2310058A1  |
| chr9  | 21042977 | 21043150 | 5' UTR (NM  | 5' UTR (NM | 713     | NM_01667  | 50868  | Keap1    | INRF2 mKI  |
| chr7  | 64593552 | 64593850 | intron (NML | 1M4 LINE   | 48540   | NM_00807  | 14407  | Gabrg3   | B230362M   |
| chr11 | 29030452 | 29030675 | promoter-1  | promoter-1 | -188    | NM_02786  | 71701  | Pnpt1    | 1200003F1  |
| chrX  | 1.31E+08 | 1.31E+08 | Intergenic  | ID_B1 SINI | -1030   | NM_01986  | 19982  | Rpl36a   | L44L Rpl44 |
| chr5  | 93634227 | 93634600 | intron (NM  | intron (NM | 1108    | NM_01736  | 12453  | Ccni     | -          |
| chr18 | 6490852  | 6491225  | promoter-1  | promoter-1 | -183    | NM_02749  | 13831  | Epc1     | 2400007E1  |
| chr11 | 1.18E+08 | 1.18E+08 | intron (NM  | intron (NM | 52145   | NM_00116  | 69926  | Dnah17   | 2810003K2  |
| chr9  | 1.19E+08 | 1.19E+08 | intron (NM  | intron (NM | 20305   | NM_17711  | 320256 | Dlec1    | D630005CC  |
| chr3  | 93248252 | 93248575 | exon (NM_   | exon (NM_  | 2161    | NM_00116  | 99681  | Tchh     | AHF AI597  |
| chr13 | 59776952 | 59777125 | intron (NM  | G-rich Low | 107     | NM_00103  | 105348 | Golm1    | 2310001L0  |
| chr16 | 70326877 | 70327000 | intron (NM  | intron (NM | 12744   | NM_02880  | 74185  | Gbe1     | 2310045H1  |
| chr14 | 26292177 | 26292400 | intron (NM  | MIRb SINE  | 13617   | NM_18320  | 328365 | Zmiz1    | BC065120   |
| chr14 | 27399152 | 27399325 | exon (NM_   | exon (NM_  | 202     | NM_14596  | 211922 | Dennd6a  | Fam116a    |
| chr10 | 1.28E+08 | 1.28E+08 | promoter-1  | promoter-1 | 103     | NM_00125  | 78428  | Wibg     | A030010BC  |
| chr5  | 92799502 | 92799625 | intron (NM  | B3 SINE B  | -7241   | NR_038116 | 56066  | Cxcl11   | Cxc11 H17  |
| chr12 | 52792327 | 52792575 | exon (NM_   | exon (NM_  | 450     | NM_00117  | 94186  | Strn3    | Gs2na SG2  |
| chr4  | 1.54E+08 | 1.54E+08 | Intergenic  | L1MB7 LIN  | -9865   | NM_17893  | 230979 | Tnfrsf14 | Atar HveA  |
| chr10 | 1.28E+08 | 1.28E+08 | promoter-1  | promoter-1 | 50      | NM_01677  | 11947  | Atp5b    | -          |
| chr8  | 13158777 | 13158950 | promoter-1  | promoter-1 | -272    | NM_01068  | 16783  | Lamp1    | AI196048 I |
| chr11 | 60231052 | 60231200 | promoter-1  | promoter-1 | 479     | NM_02575  | 66771  | Gid4     | 4933439F1  |
| chr8  | 33051427 | 33051550 | Intergenic  | Intergenic | -22813  | NM_17859  | 211323 | Nrg1     | 6030402G2  |
| chr2  | 1.73E+08 | 1.73E+08 | Intergenic  | Intergenic | 24898   | NM_01954  | 56190  | Rbm38    | Rnpc1 Seb  |
| chr11 | 97589852 | 97590075 | intron (NM  | intron (NM | 16055   | NM_05405  | 108083 | Pip4k2b  | AI848124 I |
| chr6  | 47545102 | 47545350 | promoter-1  | promoter-1 | -197    | NM_00114  | 14056  | Ezh2     | Enx-1 Enx1 |
| chr5  | 1.51E+08 | 1.51E+08 | Intergenic  | Intergenic | -83429  | NM_17288  | 320365 | Fry      | 13CDNA73   |
| chr1  | 1.87E+08 | 1.87E+08 | intron (NM  | intron (NM | 3653    | NM_00129  | 66112  | 1-Mar    | 1300013F1  |
| chr7  | 1.38E+08 | 1.38E+08 | intron (NM  | intron (NM | 7234    | NM_01956  | 56213  | Htra1    | AI429470 I |
| chr3  | 1.36E+08 | 1.36E+08 | intron (NM  | intron (NM | 22121   | NM_00129  | 19055  | Ppp3ca   | 2900074D1  |
| chr1  | 1.8E+08  | 1.8E+08  | Intergenic  | ORR1E LTF  | -37230  | NM_00116  | 269152 | Kif26b   | 4832420M   |
| chr9  | 31097877 | 31098175 | Intergenic  | Intergenic | 19040   | NM_00110  | 638580 | Gm7244   | EG638580   |
| chr12 | 87165677 | 87165775 | promoter-1  | promoter-1 | -174    | NM_00108  | 320244 | Ttll5    | 1700048H1  |
| chr7  | 54758527 | 54758650 | Intergenic  | Intergenic | -13636  | NM_15310  | 235712 | Mrgpra2b | MrgA2 Mr   |
| chr2  | 3200927  | 3201025  | promoter-1  | promoter-1 | -508    | NM_00870  | 18108  | Nmt2     | A930001KC  |
| chr2  | 1.18E+08 | 1.18E+08 | promoter-1  | promoter-1 | -487    | NM_13831  | 171543 | Bmf      | AW260063   |

|       |          |          |                       |         |           |        |          |            |
|-------|----------|----------|-----------------------|---------|-----------|--------|----------|------------|
| chr14 | 32137252 | 32137850 | promoter-1promoter-1  | -469    | NM_00103  | 110084 | Dnah1    | B230373PC  |
| chr19 | 10969577 | 10969875 | promoter-1promoter-1  | 5       | NM_00125  | 28000  | Prpf19   | AA617263   |
| chr18 | 11742252 | 11742375 | Intergenic Intergenic | -49472  | NM_00125  | 225182 | Rbbp8    | 9930104E2  |
| chr8  | 47702327 | 47702425 | promoter-1promoter-1  | 178     | NM_00100  | 408022 | Primpol  | BC065112   |
| chr10 | 80396527 | 80396825 | Intergenic Intergenic | 3840    | NM_00865  | 17873  | Gadd45b  | AI323528   |
| chr8  | 11497402 | 11497725 | promoter-1promoter-1  | -5      | NM_02699  | 69225  | Carkd    | 0710008KC  |
| chr2  | 1.1E+08  | 1.1E+08  | intron (NM CpG        | 116     | NM_01169  | 22343  | Lin7c    | 9130007B1  |
| chr2  | 71591152 | 71591325 | Intergenic Intergenic | -33758  | NM_00839  | 16403  | Itga6    | 5033401OC  |
| chr8  | 11636202 | 11636325 | promoter-1promoter-1  | -506    | NM_00128  | 102334 | Ankrd10  | 4833425P1  |
| chr2  | 11816527 | 11816650 | Intergenic Intergenic | 117208  | NM_17726  | 320816 | Ankrd16  | 2810455FO  |
| chr4  | 1.28E+08 | 1.28E+08 | intron (NM intron (NM | 405     | NM_00108  | 230761 | Zfp362   | -          |
| chr10 | 41529027 | 41529100 | intron (NM intron (NM | 406     | NM_00124  | 103268 | Cep5711  | 2410017PC  |
| chr2  | 1.26E+08 | 1.26E+08 | intron (NM intron (NM | 17501   | NM_00108  | 241633 | Atp8b4   | A530043E1  |
| chr17 | 27340702 | 27340900 | exon (NM_ exon (NM_   | 582     | NM_14607  | 224640 | Lemd2    | BC026588   |
| chr6  | 71781552 | 71781625 | intron (NM CpG        | 274     | NM_00125  | 76614  | Immt     | 1700082C1  |
| chr4  | 1.47E+08 | 1.47E+08 | promoter-1promoter-1  | -253    | NM_00130  | 11610  | Agtrap   | 3300002E1  |
| chr1  | 1.84E+08 | 1.84E+08 | Intergenic Intergenic | -23531  | NM_13381  | 98386  | Lbr      | AI505894 i |
| chr19 | 5660952  | 5661175  | 5' UTR (NV 5' UTR (NV | 2644    | NM_00116  | 20469  | Sipa1    | Spa1       |
| chr16 | 87354102 | 87354625 | promoter-1promoter-1  | -67     | NM_00115  | 67768  | N6amt1   | 5830445CC  |
| chr1  | 93049977 | 93050075 | exon (NM_ exon (NM_   | 8346    | NM_00103  | 329207 | Rbm44    | Gm817      |
| chr11 | 1.19E+08 | 1.19E+08 | promoter-1promoter-1  | 115     | NM_00116  | 338371 | Endov    | A730011LO  |
| chrX  | 12455252 | 12455375 | Intergenic Intergenic | -58686  | NM_00127  | 245350 | AA414768 | OTTMUSGC   |
| chr9  | 1.03E+08 | 1.03E+08 | promoter-1promoter-1  | 425     | NM_18139  | 69010  | Anapc13  | 1810004DC  |
| chr2  | 1.2E+08  | 1.2E+08  | Intergenic CpG        | -24213  | NM_00116  | 29808  | Mga      | AV312082   |
| chr6  | 4551452  | 4551750  | intron (NM intron (NM | 535     | NM_14539  | 213819 | Casd1    | Cas1 Cast1 |
| chr10 | 68675627 | 68675700 | promoter-1promoter-1  | 258     | NM_00108  | 69288  | Rhobtb1  | 1700008H1  |
| chr11 | 97883677 | 97883825 | 5' UTR (NV 5' UTR (NV | 190     | NM_00128  | 12295  | Cacnb1   | CAB1 Ccht  |
| chr15 | 57812327 | 57812750 | Intergenic Intergenic | -4920   | NM_17386  | 239463 | Fam83a   | -          |
| chr18 | 36177602 | 36177725 | exon (NM_ exon (NM_   | 53179   | NR_110345 | 74002  | Psd2     | 6330404E2  |
| chr13 | 99673002 | 99673150 | intron (NM intron (NM | -12079  | NM_00104  | 238799 | Tnpol    | AU021749   |
| chr8  | 37330352 | 37330675 | Intergenic MTEb LTR   | -17943  | NM_00108  | 244421 | Lonrf1   | -          |
| chr12 | 86452152 | 86452250 | intron (NM CpG        | 418     | NM_03022  | 78920  | Dlst     | 1600017E0  |
| chr19 | 28086177 | 28086600 | promoter-1promoter-1  | -732    | NM_01126  | 19726  | Rfx3     | C230093O:  |
| chr4  | 1.43E+08 | 1.43E+08 | intron (NM CpG        | 824     | NM_00108  | 110593 | Prdm2    | 4833427P1  |
| chr13 | 1.13E+08 | 1.13E+08 | Intergenic ORR1E LTF  | -226458 | NM_00116  | 77318  | Ankrd55  | C030011JO  |
| chr2  | 1.48E+08 | 1.48E+08 | Intergenic Intergenic | -2812   | NM_00921  | 20608  | Sstr4    | Smstr4 sst |
| chr1  | 84836652 | 84836750 | promoter-1promoter-1  | 285     | NM_02538  | 66153  | Fbxo36   | 0610008D1  |
| chr1  | 1.8E+08  | 1.8E+08  | intron (NM intron (NM | 5214    | NM_01680  | 51810  | Hnrnpu   | AA408410   |
| chr7  | 1.4E+08  | 1.4E+08  | non-coding non-coding | 537     | NM_02993  | 77590  | Chst15   | 4631426JO  |
| chr13 | 81921752 | 81922175 | promoter-1promoter-1  | -328    | NM_00768  | 12626  | Cetn3    | MmCEN3     |
| chr10 | 1.17E+08 | 1.17E+08 | Intergenic Intergenic | -60522  | NM_00101  | 432508 | Cpsf6    | 4733401N1  |
| chr2  | 1.8E+08  | 1.8E+08  | promoter-1promoter-1  | -106    | NM_17555  | 23856  | Dido1    | 6720461J1  |
| chr19 | 36296702 | 36296825 | Intergenic Intergenic | -102429 | NM_01346  | 107765 | Ankrd1   | Alrp CARP  |
| chr17 | 29521852 | 29522050 | Intergenic Intergenic | 24092   | NM_00115  | 26382  | Fgd2     | Tcd-2 Tcd2 |
| chr13 | 1.09E+08 | 1.09E+08 | intron (NM intron (NM | 20919   | NM_02804  | 71991  | Ercc8    | 2410022PC  |
| chr5  | 1.44E+08 | 1.44E+08 | intron (NM CpG        | 340     | NM_00739  | 11461  | Actb     | Actx E430C |
| chr5  | 32155177 | 32155475 | intron (NM intron (NM | 154903  | NM_18128  | 107976 | Bre      | 6030405P1  |

|       |          |          |            |             |         |          |        |           |            |
|-------|----------|----------|------------|-------------|---------|----------|--------|-----------|------------|
| chr7  | 71081227 | 71081425 | intron (NM | intron (NM  | 2475    | NM_02136 | 50794  | Klf13     | 0610043C1  |
| chr3  | 1.57E+08 | 1.57E+08 | intron (NM | intron (NM  | -261785 | NM_01738 | 53861  | Zranb2    | AI227013 ; |
| chr3  | 1.04E+08 | 1.04E+08 | 5' UTR (NM | 5' UTR (NM  | 235     | NM_00130 | 15257  | Hipk1     | 1110062KC  |
| chr1  | 34658927 | 34659325 | Intergenic | CT-rich Lov | 22588   | NM_21372 | 211383 | Amer3     | 9430069J0  |
| chr14 | 70553402 | 70553475 | TTS (NM_0  | TTS (NM_0   | 160     | NM_14605 | 219158 | Ccar2     | 2610301G1  |
| chr10 | 80598077 | 80598175 | promoter-1 | promoter-1  | -890    | NM_01073 | 16969  | Zbtb7a    | 9030619KC  |
| chr8  | 41596577 | 41597275 | promoter-1 | promoter-1  | 182     | NM_00127 | 18983  | Cnot7     | AU022737   |
| chr6  | 82863427 | 82863575 | exon (NM_  | exon (NM_   | 26243   | NM_01135 | 20355  | Sema4f    | -          |
| chr7  | 26687202 | 26687425 | intron (NM | intron (NM  | 4636    | NM_00999 | 13088  | Cyp2b10   | Cyp2b Cyp  |
| chr7  | 75028027 | 75028100 | Intergenic | Intergenic  | -69080  | NM_01051 | 16001  | Igf1r     | A330103N;  |
| chr18 | 77820852 | 77821225 | Intergenic | Intergenic  | -17163  | NM_00116 | 225743 | Rnf165    | 2900024M   |
| chr6  | 1.23E+08 | 1.23E+08 | Intergenic | CpG         | -8914   | NM_02189 | 60611  | Foxj2     | Fhx        |
| chr3  | 10273727 | 10273925 | intron (NM | Lx8 LINE L  | 27357   | NM_02931 | 75497  | Fabp12    | 1700008GC  |
| chr18 | 67459302 | 67459600 | intron (NM | intron (NM  | 10574   | NM_05326 | 114663 | Impa2     | 2210415D2  |
| chr16 | 37868052 | 37868375 | promoter-1 | promoter-1  | -273    | NM_17709 | 320184 | Lrrc58    | 1810012N1  |
| chr1  | 1.56E+08 | 1.56E+08 | promoter-1 | promoter-1  | -593    | NM_01188 | 24014  | Rnase1    | E23002910  |
| chr14 | 51711052 | 51711300 | intron (NM | intron (NM  | 424     | NM_02147 | 58809  | Rnase4    | C730049F2  |
| chr3  | 96439452 | 96439725 | promoter-1 | promoter-1  | -182    | NM_00116 | 18632  | Pex11b    | PEX11beta  |
| chr2  | 1.19E+08 | 1.19E+08 | promoter-1 | promoter-1  | -390    | NM_02692 | 69065  | Chac1     | 1810008KC  |
| chr18 | 7868877  | 7869000  | promoter-1 | promoter-1  | 108     | NM_00128 | 225131 | Wac       | 1110067PC  |
| chr16 | 90283127 | 90283275 | intron (NM | intron (NM  | 1469    | NM_17892 | 224432 | Scaf4     | AA517739   |
| chr1  | 1.36E+08 | 1.36E+08 | intron (NM | intron (NM  | 13045   | NM_03118 | 17928  | Myog      | MYF4 bHLI  |
| chr5  | 1.11E+08 | 1.11E+08 | exon (NM_  | exon (NM_   | 115     | NM_14514 | 107999 | Gtpbp6    | AV119224   |
| chr15 | 66301177 | 66301350 | intron (NM | intron (NM  | 31209   | NM_01945 | 54562  | Lrrc6     | LRTP       |
| chr8  | 1.24E+08 | 1.24E+08 | intron (NM | intron (NM  | 1280    | NM_00103 | 407789 | BC048644  | -          |
| chr9  | 54433902 | 54433975 | promoter-1 | promoter-1  | -380    | NM_02957 | 67834  | Idh3a     | 1110003P1  |
| chr1  | 58026327 | 58027100 | promoter-1 | promoter-1  | 215     | NM_00115 | 51960  | Kctd18    | 4932411A2  |
| chr2  | 1.44E+08 | 1.44E+08 | intron (NM | MER5B DN    | 1180    | NM_18141 | 228714 | Csrp2bp   | 2510008M   |
| chr4  | 63215027 | 63215175 | Intergenic | Intergenic  | -6293   | NM_14490 | 230279 | 6330416G1 | AW492431   |
| chrX  | 13077502 | 13077575 | Intergenic | L1MD LINE   | 32740   | NM_17341 | 236690 | Nyx       | CLNP CSNF  |
| chr11 | 1.09E+08 | 1.09E+08 | 5' UTR (NM | 5' UTR (NM  | -11916  | NM_00102 | 104681 | Slc16a6   | AW743111   |
| chr11 | 90120502 | 90120600 | intron (NM | intron (NM  | 9761    | NM_02617 | 67468  | Mmd       | 1200017E0  |
| chr7  | 29623427 | 29623675 | intron (NM | intron (NM  | 4350    | NM_01070 | 16857  | Lgals6    | galectin-6 |
| chr6  | 86616577 | 86616675 | intron (NM | intron (NM  | 2527    | NM_01075 | 17119  | Mxd1      | AW122478   |
| chr2  | 84510702 | 84510950 | promoter-1 | promoter-1  | 39      | NM_00103 | 72657  | 2700094K1 | Selh       |
| chr10 | 60938602 | 60938750 | promoter-1 | promoter-1  | 95      | NM_15354 | 216011 | Lrrc20    | BC036304   |
| chr8  | 97543927 | 97544050 | intron (NM | intron (NM  | 2396    | NM_17303 | 54672  | Gpr97     | A030001G;  |
| chr5  | 31797327 | 31797500 | intron (NM | intron (NM  | 279     | NM_13375 | 74254  | Gpn1      | 2410004J0  |
| chr14 | 51628002 | 51628325 | intron (NM | intron (NM  | 559     | NM_02914 | 75019  | Rnase10   | 4930474F2  |
| chr9  | 1.08E+08 | 1.08E+08 | promoter-1 | promoter-1  | -355    | NM_00111 | 69232  | Qrich1    | 2610028HC  |
| chr4  | 59452902 | 59453200 | Intergenic | Intergenic  | -1546   | NM_00116 | 634731 | Susd1     | A530080P1  |
| chr13 | 53080702 | 53081475 | Intergenic | Intergenic  | -4680   | NM_01737 | 18030  | Nfil3     | AV225605   |
| chr8  | 13869677 | 13869875 | 5' UTR (NM | 5' UTR (NM  | 135     | NM_18185 | 101994 | Champ1    | AA675043   |
| chr8  | 1.13E+08 | 1.13E+08 | Intergenic | PB1D7 SIN   | -7552   | NM_00917 | 20444  | St3gal2   | AI429591 , |
| chr5  | 1.49E+08 | 1.49E+08 | Intergenic | Intergenic  | -20916  | NM_02562 | 66537  | Pomp      | 2510048OC  |
| chr2  | 71712027 | 71712150 | intron (NM | intron (NM  | 807     | NM_17266 | 228026 | Pdk1      | B830012BC  |
| chr17 | 46783202 | 46783300 | promoter-1 | promoter-1  | 54      | NM_02530 | 27398  | Mrpl2     | CGI-22 MR  |

|       |          |          |            |            |         |           |        |          |            |
|-------|----------|----------|------------|------------|---------|-----------|--------|----------|------------|
| chr13 | 37222602 | 37222725 | Intergenic | Intergenic | -80550  | NM_00116  | 74145  | F13a1    | 120001410: |
| chr9  | 1.24E+08 | 1.24E+08 | 3' UTR (NM | 3' UTR (NM | 4869    | NM_00991  | 12774  | Ccr5     | AM4-7 CD   |
| chr19 | 56896302 | 56896450 | Intergenic | CpG        | -4323   | NM_00100  | 83561  | Tdrd1    | MTR-1      |
| chr5  | 76126802 | 76127375 | Intergenic | Intergenic | 156072  | NM_02109  | 16590  | Kit      | Bs CD117   |
| chr19 | 8787802  | 8787950  | exon (NM_  | exon (NM_  | 511     | NM_00857  | 17254  | Slc3a2   | 4F2 4F2HC  |
| chr6  | 42303377 | 42303475 | intron (NM | intron (NM | 3599    | NM_00128  | 22793  | Zyx      | 9530098HC  |
| chr8  | 1.23E+08 | 1.23E+08 | intron (NM | intron (NM | 48731   | NM_03020  | 78892  | Crispld2 | 1810049K2  |
| chr4  | 1.47E+08 | 1.47E+08 | Intergenic | Intergenic | -1703   | NM_01112  | 18822  | Plod1    | 2410042F0  |
| chr3  | 95032077 | 95032200 | promoter-1 | promoter-1 | -208    | NM_17239  | 57912  | Cdc42se1 | 1300002M   |
| chr19 | 44210227 | 44210450 | promoter-1 | promoter-1 | 28      | NM_00108  | 72502  | Cwf19l1  | 2610528CC  |
| chr10 | 92884702 | 92884950 | Intergenic | L1MA8 LIN  | -31315  | NM_00851  | 16993  | Lta4h    | -          |
| chr12 | 1.07E+08 | 1.07E+08 | intron (NM | intron (NM | 20428   | NM_00102  | 22367  | Vrk1     | 51PK       |
| chr12 | 8666502  | 8666750  | Intergenic | L2b LINE L | -14314  | NM_00116  | 80913  | Pum2     | 5730503J2  |
| chr2  | 83484377 | 83484575 | promoter-1 | promoter-1 | -259    | NM_02693  | 69082  | Zc3h15   | 1700006A1  |
| chr13 | 1.13E+08 | 1.13E+08 | Intergenic | Intergenic | -119871 | NM_00116  | 77318  | Ankrd55  | C030011J0  |
| chr6  | 93720902 | 93721050 | intron (NM | intron (NM | 141981  | NR_104594 | 14924  | Magi1    | AIP3 BAP1  |
| chr17 | 56754652 | 56754775 | exon (NM_  | exon (NM_  | 1895    | NM_01873  | 54217  | Rpl36    | -          |
| chr18 | 39153002 | 39153175 | 5' UTR (NM | 5' UTR (NM | 289     | NM_17516  | 71302  | Arhgap26 | 1810044B2  |
| chr1  | 40689602 | 40689675 | Intergenic | Intergenic | -48919  | NM_00103  | 226999 | Slc9a2   | 2210416H1  |
| chr4  | 1.25E+08 | 1.25E+08 | intron (NM | intron (NM | 5437    | NM_15315  | 230738 | Zc3h12a  | BC036563   |
| chr8  | 37158052 | 37158200 | intron (NM | CpG        | 244     | NM_17291  | 244418 | D8Ert82e | 9830148H2  |
| chr11 | 1.1E+08  | 1.1E+08  | Intergenic | Lx9 LINE L | -36493  | NM_15378  | 208659 | Fam20a   | AI606893   |
| chr10 | 57206552 | 57206775 | promoter-1 | promoter-1 | 472     | NM_00829  | 15500  | Hsf2     | AI661205   |
| chr6  | 88674377 | 88674525 | promoter-1 | promoter-1 | 45      | NM_01184  | 23945  | Mgll     | AA589436   |
| chr17 | 34168752 | 34169475 | promoter-1 | promoter-1 | -182    | NM_00120  | 20182  | Rxb      | AL023085   |
| chr3  | 36240252 | 36240500 | Intergenic | MTE-int LT | -119179 | NM_19819  | 229214 | Qrfpr    | AQ27 Gpr:  |
| chr2  | 1.26E+08 | 1.26E+08 | intron (NM | intron (NM | 16851   | NM_00108  | 241633 | Atp8b4   | A530043E1  |
| chr10 | 1.08E+08 | 1.08E+08 | Intergenic | Intergenic | -22330  | NM_02789  | 17931  | Ppp1r12a | 1200015F0  |
| chr6  | 70737652 | 70737825 | intron (NM | intron (NM | 4431    | NM_00907  | 19895  | Rpia     | RPI        |
| chr3  | 1.52E+08 | 1.52E+08 | Intergenic | Intergenic | 135188  | NM_01686  | 54120  | Gipc2    | 2200002NC  |
| chr2  | 78889077 | 78889175 | Intergenic | Intergenic | 179922  | NM_00945  | 22193  | Ube2e3   | Ubce4 ubc  |
| chr4  | 45421827 | 45422025 | promoter-1 | promoter-1 | -288    | NM_00100  | 230125 | Slc25a51 | 9130208E0  |
| chr2  | 1.55E+08 | 1.55E+08 | intron (NM | intron (NM | 28051   | NM_02936  | 75608  | Chmp4b   | 2010012F0  |
| chr12 | 78323727 | 78323800 | Intergenic | Intergenic | -15328  | NM_00125  | 53618  | Fut8     | -          |
| chr1  | 1.36E+08 | 1.36E+08 | 5' UTR (NM | 5' UTR (NM | 108     | NM_15289  | 75605  | Kdm5b    | 2010009J1  |
| chr9  | 40595452 | 40595700 | Intergenic | (GGAGAA)r  | -13780  | NM_03116  | 15481  | Hspa8    | 2410008N1  |
| chr11 | 1.21E+08 | 1.21E+08 | promoter-1 | promoter-1 | -613    | NM_00108  | 68837  | Foxk2    | 1110054HC  |
| chr9  | 1.2E+08  | 1.2E+08  | Intergenic | Intergenic | -29690  | NM_14455  | 245049 | Myrip    | A230081N:  |
| chr14 | 65962877 | 65963025 | Intergenic | CpG        | -14562  | NM_19902  | 380912 | Zfp395   | BC053701   |
| chr1  | 1.68E+08 | 1.68E+08 | promoter-1 | promoter-1 | -176    | NM_00103  | 226594 | Rcsd1    | A430105K1  |
| chr8  | 67191352 | 67191475 | Intergenic | Intergenic | -19576  | NM_01349  | 12876  | Cpe      | CPH Cph-1  |
| chr1  | 1.83E+08 | 1.83E+08 | Intergenic | Intergenic | -2231   | NM_14594  | 208768 | Sde2     | -          |
| chr17 | 3557152  | 3557375  | promoter-1 | promoter-1 | 450     | NM_14607  | 224481 | Tfb1m    | AI429207   |
| chr4  | 53999852 | 54000075 | Intergenic | Intergenic | 161046  | NM_02805  | 52076  | Tmem38b  | 1600017F2  |
| chr13 | 55993677 | 55993825 | Intergenic | Intergenic | -60965  | NM_01109  | 18740  | Pitx1    | Bft P-OTX  |
| chr12 | 72932452 | 72932550 | intron (NM | CpG        | 446     | NM_17246  | 208846 | Daam1    | -          |
| chr4  | 1.28E+08 | 1.28E+08 | intron (NM | intron (NM | -109799 | NM_02703  | 69317  | Hmgb4    | 1700001F2  |



|       |          |          |            |            |         |           |        |           |            |
|-------|----------|----------|------------|------------|---------|-----------|--------|-----------|------------|
| chr2  | 1.81E+08 | 1.81E+08 | TTS (NM_0  | TTS (NM_0  | 627     | NM_02676  | 68556  | Uckl1     | 1110007H1  |
| chr1  | 65274502 | 65274575 | intron (NM | intron (NM | 41279   | NM_01108  | 18711  | Pikfyve   | 5230400C1  |
| chr4  | 54528877 | 54528950 | Intergenic | Intergenic | -431904 | NM_17286  | 242466 | Zfp462    | 6030417HC  |
| chr11 | 50099952 | 50100100 | intron (NM | intron (NM | 5812    | NM_17533  | 103806 | Maml1     | AI644666 , |
| chr12 | 76697627 | 76697875 | promoter-1 | promoter-1 | -564    | NM_01202  | 26932  | Ppp2r5e   | 4633401M   |
| chr11 | 97172602 | 97172900 | Intergenic | Intergenic | -4279   | NM_02592  | 67036  | Mrpl45    | 2600005PC  |
| chr5  | 1.51E+08 | 1.51E+08 | exon (NM_  | exon (NM_  | 124     | NM_13389  | 100637 | N4bp2l1   | 2410024N1  |
| chr5  | 1.22E+08 | 1.22E+08 | intron (NM | intron (NM | 1007    | NM_02612  | 67397  | Erp29     | 1200015M   |
| chr11 | 1.15E+08 | 1.15E+08 | promoter-1 | promoter-1 | 56      | NM_00104  | 67671  | Rpl38     | 0610025G1  |
| chr17 | 37407627 | 37407975 | intron (NM | intron (NM | 622     | NM_01381  | 14991  | H2-M3     | H-2M3 Hr   |
| chr12 | 1.13E+08 | 1.13E+08 | intron (NM | intron (NM | 1429    | NM_00939  | 21928  | Tnfaip2   | B94 Exoc3  |
| chr9  | 5298327  | 5298425  | promoter-1 | promoter-1 | -141    | NM_00980  | 12362  | Casp1     | ICE I11bc  |
| chr8  | 67469327 | 67469525 | Intergenic | Intergenic | -1658   | NM_00116  | 73067  | Tmem192   | 3110005G2  |
| chr7  | 1.35E+08 | 1.35E+08 | 5' UTR (NM | 5' UTR (NM | 110     | NM_14620  | 233893 | Zfp764    | 8030466O1  |
| chr10 | 1.28E+08 | 1.28E+08 | intron (NM | intron (NM | -1432   | NM_01086  | 17904  | Myl6      | ESMLC LC1  |
| chr8  | 34496702 | 34496800 | promoter-1 | promoter-1 | -46     | NM_15282  | 75029  | Purg      | 4930486B1  |
| chr10 | 1.21E+08 | 1.21E+08 | exon (NM_  | exon (NM_  | 180     | NM_02936  | 75612  | Gns       | 2610016K1  |
| chr8  | 96697402 | 96697550 | TTS (NM_0  | TTS (NM_0  | 958     | NM_00863  | 17750  | Mt2       | AA409533   |
| chr16 | 57121502 | 57122250 | promoter-1 | promoter-1 | 49      | NM_13859  | 28185  | Tomm70a   | 2610044B2  |
| chr9  | 43917927 | 43918150 | TTS (NM_1  | TTS (NM_1  | 2646    | NM_00119  | 235312 | C1qtnf5   | Ctrp5      |
| chr5  | 69983502 | 69983650 | promoter-1 | promoter-1 | -52     | NM_00103  | 67980  | Gnpda2    | 492152311: |
| chr5  | 30771377 | 30771500 | intron (NM | (ATG)n Sin | 2988    | NM_02928  | 75434  | 1700001CC | 1700047H1  |
| chr1  | 1.85E+08 | 1.85E+08 | Intergenic | Intergenic | -9093   | NM_01692  | 53791  | Tlr5      | -          |
| chr1  | 65154302 | 65154575 | 3' UTR (NM | 3' UTR (NM | -4501   | NM_00777  | 12964  | Cryga     | Cryg-4 DG  |
| chr3  | 95799302 | 95799425 | intron (NM | intron (NM | 399     | NM_02332  | 67220  | Plekho1   | 2810052M   |
| chr15 | 76026302 | 76026600 | promoter-1 | promoter-1 | -311    | NM_20139  | 18810  | Plec      | AA591047   |
| chr5  | 65884527 | 65884825 | promoter-1 | promoter-1 | -602    | NM_13369  | 68552  | Smim14    | 1110003E0  |
| chr7  | 1.09E+08 | 1.09E+08 | promoter-1 | promoter-1 | -392    | NM_00116  | 69358  | Lrrc51    | 1700008DC  |
| chr1  | 94803627 | 94803850 | exon (NM_  | exon (NM_  | 172     | NM_17511  | 67446  | Dusp28    | 0710001B2  |
| chr11 | 74773552 | 74773675 | intron (NM | intron (NM | 34239   | NM_00100  | 103677 | Smg6      | AI317223 , |
| chr12 | 70432202 | 70432425 | intron (NM | B3 SINE B  | 25850   | NM_02544  | 66244  | Nemf      | 150001111: |
| chr9  | 1.08E+08 | 1.08E+08 | Intergenic | Intergenic | 3702    | NM_00816  | 14775  | Gpx1      | AI195024 , |
| chr1  | 1.76E+08 | 1.76E+08 | Intergenic | Lx8 LINE L | -42313  | NM_00832  | 15951  | Ifi204    | Ifi16 p204 |
| chr1  | 1.83E+08 | 1.83E+08 | promoter-1 | promoter-1 | 25      | NM_02617  | 67459  | Nvl       | 120000912, |
| chr1  | 46471727 | 46472000 | Intergenic | RLTR45 LT  | 348280  | NM_00116  | 227058 | Dnah7b    | Dnahc7b C  |
| chr1  | 51704952 | 51705025 | Intergenic | Intergenic | -169745 | NM_02869  | 109019 | Nabp1     | 4930434HC  |
| chr18 | 38551277 | 38551525 | Intergenic | MIRb SINE  | -27228  | NM_02299  | 65113  | Ndfip1    | 0610010M   |
| chr5  | 32440802 | 32441225 | intron (NM | intron (NM | 2168    | NM_00803  | 14284  | Fosl2     | Fra-2      |
| chr2  | 77783927 | 77784200 | intron (NM | CpG        | 350     | NM_00129  | 80744  | Cwc22     | AA684037   |
| chr15 | 58715452 | 58716000 | Intergenic | RCHARR1 I  | -5058   | NM_17522  | 75841  | Rnf139    | 4930555P1  |
| chr10 | 62801777 | 62802100 | promoter-1 | promoter-1 | -155    | NM_00115  | 93759  | Sirt1     | AA673258   |
| chr6  | 1.29E+08 | 1.29E+08 | Intergenic | CpG        | -16793  | NM_03059  | 80782  | Klrb1b    | Klrb1d Ly5 |
| chr2  | 1.27E+08 | 1.27E+08 | Intergenic | MTD LTR I  | -2096   | NR_11098: | 56461  | Kcnp3     | 4933407H1  |
| chr7  | 1.21E+08 | 1.21E+08 | Intergenic | Intergenic | -55076  | NM_02062  | 19226  | Pth       | Pthp       |
| chr2  | 1.22E+08 | 1.22E+08 | exon (NM_  | exon (NM_  | 615     | NM_00103  | 214616 | Spata5l1  | AV141009   |
| chr13 | 22153352 | 22153425 | Intergenic | Intergenic | 18289   | NM_17819  | 319183 | Hist1h2bj | -          |
| chr16 | 10927152 | 10927425 | Intergenic | Intergenic | 65926   | NM_01998  | 56722  | Litaf     | 3222402J1  |

|       |          |          |            |            |         |          |        |           |            |
|-------|----------|----------|------------|------------|---------|----------|--------|-----------|------------|
| chr5  | 1.22E+08 | 1.22E+08 | Intergenic | B2_Mm2 S   | -21317  | NM_00912 | 20239  | Atxn2     | 9630045M   |
| chr5  | 31495752 | 31495950 | promoter-1 | promoter-1 | 174     | NM_15368 | 266781 | Snx17     | 5830447M   |
| chr3  | 90482677 | 90482850 | Intergenic | Intergenic | 9770    | NM_01365 | 20201  | S100a8    | 60B8Ag AI  |
| chr7  | 4745027  | 4745200  | exon (NM_  | exon (NM_  | 546     | NM_00908 | 19943  | Rpl28     | D7Wsu21e   |
| chr17 | 47903752 | 47904050 | intron (NM | intron (NM | -18792  | NM_01154 | 21425  | Tfeb      | Tcfcb bHLI |
| chr5  | 36807877 | 36808075 | intron (NM | CpG        | 142     | NM_02447 | 17713  | Grpel1    | AA408748   |
| chr13 | 73741402 | 73741475 | promoter-1 | promoter-1 | -12     | NM_14604 | 218335 | Clptm1l   | C1300521l. |
| chr4  | 3731427  | 3731525  | Intergenic | Intergenic | 31271   | NM_02614 | 67427  | Rps20     | 4632426KC  |
| chr2  | 1.27E+08 | 1.27E+08 | intron (NM | intron (NM | 1220    | NM_02322 | 66552  | Sppl2a    | 2010106GC  |
| chr16 | 24238752 | 24238825 | Intergenic | Intergenic | -154648 | NM_17866 | 210126 | Lpp       | 9430020K1  |
| chr9  | 72961177 | 72961400 | promoter-1 | promoter-1 | 12      | NM_19860 | 225215 | Rsl24d1   | 2410159K2  |
| chr13 | 5874727  | 5875125  | Intergenic | Intergenic | 14191   | NM_01180 | 23849  | Klf6      | AI448727 I |
| chr10 | 11021927 | 11022025 | Intergenic | Intergenic | 20591   | NM_00116 | 71865  | Fbxo30    | 1700026A1  |
| chr11 | 96691902 | 96692100 | promoter-1 | promoter-1 | -719    | NM_00868 | 18023  | Nfe2l1    | AA408798   |
| chr5  | 1.03E+08 | 1.03E+08 | Intergenic | MTE-int LT | -56609  | NM_14616 | 231532 | Arhgap24  | 0610025G2  |
| chr1  | 1.36E+08 | 1.36E+08 | Intergenic | Intergenic | 20599   | NM_05407 | 269120 | Opc       | -          |
| chr14 | 70451452 | 70451550 | intron (NM | intron (NM | -25751  | NM_01878 | 13655  | Egr3      | Pilot      |
| chr7  | 57033852 | 57034225 | exon (NM_  | exon (NM_  | 310     | NM_13374 | 71974  | Prmt3     | 2010005E2  |
| chr15 | 74358677 | 74358775 | intron (NM | MIR SINE   | 12100   | NM_17499 | 107831 | Bai1      | B830018M   |
| chr3  | 9609327  | 9609550  | exon (NM_  | exon (NM_  | 647     | NM_13321 | 170753 | Zfp704    | C030026M   |
| chr13 | 65341927 | 65342000 | Intergenic | Intergenic | -34939  | NM_17529 | 97895  | Nlrp4f    | C330026N(  |
| chr13 | 1.02E+08 | 1.02E+08 | intron (NM | intron (NM | -26403  | NM_00102 | 18708  | Pik3r1    | PI3K p50al |
| chr1  | 18542277 | 18542725 | Intergenic | LTR33C LT  | -287282 | NM_00104 | 654464 | Gm15386   | BD-17 Def  |
| chr2  | 18615752 | 18616325 | Intergenic | CpG        | -4611   | NM_00100 | 381350 | BC061194  | -          |
| chrX  | 74776427 | 74776550 | intron (NM | intron (NM | 19922   | NM_02060 | 21372  | Tbl1x     | 5330429M   |
| chr17 | 48386702 | 48386775 | promoter-1 | promoter-1 | -158    | NM_02140 | 58218  | Trem3     | BB134760   |
| chr1  | 1.08E+08 | 1.08E+08 | promoter-1 | promoter-1 | 238     | NM_17318 | 227446 | 2310035C2 | 6430401N1  |
| chr11 | 94189177 | 94189575 | promoter-1 | promoter-1 | 61      | NM_14602 | 71452  | Ankrd40   | 1110011CC  |
| chr8  | 86424127 | 86424200 | 5' UTR (NV | 5' UTR (NV | 166     | NM_18103 | 330814 | Lphn1     | 2900070I0! |
| chr15 | 98702002 | 98702200 | promoter-1 | promoter-1 | -465    | NM_00103 | 381022 | Kmt2d     | ALR BC032  |
| chr1  | 99558077 | 99558350 | intron (NM | CpG        | 382     | NM_13382 | 52392  | D1Ertd622 | AI987691 , |
| chr1  | 1.56E+08 | 1.56E+08 | intron (NM | intron (NM | 3357    | NM_01188 | 24014  | Rnase1    | E230029I0  |
| chr15 | 1E+08    | 1E+08    | promoter-1 | promoter-1 | -318    | NM_15340 | 207785 | Csrnp2    | CSRNP-2 C  |
| chr12 | 81111902 | 81112300 | Intergenic | Intergenic | 101899  | NM_00756 | 12192  | Zfp36l1   | AW742437   |
| chr19 | 3401627  | 3401850  | intron (NM | intron (NM | 12360   | NM_00128 | 17771  | Mtl5      | tesmin     |
| chr9  | 13767652 | 13767800 | Intergenic | Intergenic | 135555  | NM_17683 | 72826  | Fam76b    | 2810485I0! |
| chr4  | 59442402 | 59442525 | intron (NM | intron (NM | 9042    | NM_00116 | 634731 | Susd1     | A530080P1  |
| chr11 | 1.07E+08 | 1.07E+08 | intron (NM | intron (NM | 51233   | NM_14582 | 71795  | Pitpnc1   | 1110020BC  |
| chr8  | 3672277  | 3672500  | Intergenic | Intergenic | -4089   | NM_02570 | 66682  | Trappc5   | 4021401A1  |
| chr8  | 1.17E+08 | 1.17E+08 | Intergenic | Intergenic | -27296  | NM_00100 | 403395 | Clec3a    | 1110019O!  |
| chr1  | 1.83E+08 | 1.83E+08 | intron (NM | MTB LTR I  | 7669    | NM_14594 | 208768 | Sde2      | -          |
| chr4  | 97800927 | 97801000 | Intergenic | Intergenic | 248993  | NM_05315 | 94043  | Tm2d1     | 2310026L1  |
| chr12 | 4600627  | 4600775  | intron (NM | intron (NM | 887     | NM_00119 | 20403  | Its2      | AI327390 I |
| chr8  | 28089127 | 28089200 | exon (NM_  | exon (NM_  | 1355    | NM_00111 | 353310 | Zfp703    | 1110032O!  |
| chr7  | 31017352 | 31017450 | promoter-1 | promoter-1 | 308     | NM_02725 | 69920  | Polr2i    | 2810002B1  |
| chr9  | 1.04E+08 | 1.04E+08 | intron (NM | intron (NM | 28922   | NM_00116 | 235567 | Dnajc13   | D030002L1  |
| chr15 | 5193977  | 5194100  | 5' UTR (NV | 5' UTR (NV | 149     | NM_00113 | 19219  | Ptger4    | EP4 Ptgerc |

|       |          |          |                        |         |          |        |         |            |
|-------|----------|----------|------------------------|---------|----------|--------|---------|------------|
| chr10 | 92605852 | 92605975 | Intergenic (CA)n Simf  | -17708  | NM_14623 | 237459 | Cdk17   | 6430598J1  |
| chr8  | 71614952 | 71615175 | intron (NM intron (NM  | -1942   | NM_15305 | 110877 | Slc18a1 | 48324161I  |
| chr5  | 1.23E+08 | 1.23E+08 | intron (NM intron (NM  | 12089   | NM_00987 | 12589  | lft81   | AW060663   |
| chr1  | 1.46E+08 | 1.46E+08 | Intergenic Lx9 LINE L  | 43678   | NM_00906 | 19735  | Rgs2    | GOS8       |
| chr2  | 79538152 | 79538250 | Intergenic Intergenic  | -9736   | NM_17242 | 75276  | Ppp1r1c | 4930565M   |
| chr2  | 1.58E+08 | 1.58E+08 | intron (NM intron (NM  | 6884    | NM_00848 | 16803  | Lbp     | Bpifd2 Ly8 |
| chr9  | 92116952 | 92117125 | Intergenic Lx9 LINE L  | -27994  | NM_01163 | 22038  | Plscr1  | MmTRA1a    |
| chr9  | 71521402 | 71521500 | intron (NM ORR1D2 L    | -81284  | NM_00103 | 102371 | Myzap   | AA407270   |
| chr8  | 47848927 | 47849125 | intron (NM intron (NM  | 23927   | NM_00839 | 16363  | Irf2    | 9830146E2  |
| chr11 | 69446677 | 69446775 | 5' UTR (NV 5' UTR (NV  | 253     | NM_01181 | 23879  | Fxr2    | Fxr2h      |
| chr13 | 21545302 | 21545425 | intron (NM intron (NM  | 233     | NM_00101 | 432731 | Zscan26 | BC068174   |
| chr2  | 34683802 | 34683900 | Intergenic Intergenic  | -2096   | NM_00116 | 30050  | Fbxw2   | 2700071L0  |
| chr12 | 80453227 | 80453425 | intron (NM intron (NM  | 54988   | NM_00125 | 19363  | Rad51b  | AI553500 I |
| chr1  | 1.35E+08 | 1.35E+08 | intron (NM intron (NM  | 31124   | NM_00109 | 240752 | Pik3c2b | C330011J1  |
| chr1  | 38053527 | 38054100 | intron (NM CpG         | 240     | NM_17205 | 98258  | Txndc9  | AI098020 , |
| chr15 | 66920202 | 66920350 | Intergenic Intergenic  | 88168   | NM_00917 | 20442  | St3gal1 | 5330418N2  |
| chr19 | 3696177  | 3696325  | Intergenic Intergenic  | -9687   | NM_00851 | 16973  | Lrp5    | BMND1 HI   |
| chr7  | 1.5E+08  | 1.5E+08  | intron (NR intron (NR_ | 17962   | NM_00112 | 27027  | Tspan32 | AW208513   |
| chr4  | 83132102 | 83132300 | 5' UTR (NV 5' UTR (NV  | 151     | NM_00129 | 101739 | Psip1   | AA408851   |
| chr16 | 44458052 | 44458200 | intron (NM Lx8 LINE L  | 63214   | NM_00103 | 212517 | Cfap44  | 6330444M   |
| chr5  | 1.45E+08 | 1.45E+08 | intron (NM intron (NM  | -12179  | NM_17768 | 231874 | Ccz1    | AU022870   |
| chr7  | 1.28E+08 | 1.28E+08 | intron (NM intron (NM  | 3031    | NM_03069 | 80719  | Igsf6   | -          |
| chr16 | 78296152 | 78296250 | Intergenic Intergenic  | -5715   | NM_00998 | 13052  | Cxadr   | 2610206D0  |
| chr5  | 33678577 | 33678800 | intron (NM CpG         | 467     | NM_02150 | 59003  | Maea    | 1110030D1  |
| chr6  | 1.34E+08 | 1.34E+08 | intron (NM intron (NM  | 1288    | NM_00796 | 14011  | Etv6    | AW123102   |
| chr18 | 15221577 | 15221825 | exon (NM exon (NM_     | 390     | NM_00114 | 106931 | Kctd1   | 4933402K1  |
| chr17 | 24563652 | 24563725 | promoter-1promoter-1   | 60      | NM_01002 | 13177  | Eci1    | Dci eci    |
| chr13 | 46822752 | 46822950 | 5' UTR (NV 5' UTR (NV  | 367     | NM_17574 | 218210 | Nup153  | B130015D1  |
| chr8  | 73429927 | 73430175 | intron (NM CpG         | 178     | NM_17301 | 270058 | Map1s   | 6430517J1  |
| chr5  | 37201802 | 37202175 | intron (NM intron (NM  | -13995  | NM_02624 | 67568  | Mrfap1  | 9130413I2: |
| chr1  | 59013252 | 59013475 | intron (NM intron (NM  | 16963   | NM_17240 | 70827  | Trak2   | 2900022D0  |
| chr1  | 1.37E+08 | 1.37E+08 | promoter-1promoter-1   | -295    | NM_15377 | 226432 | Ipo9    | 0710008K0  |
| chr19 | 47939977 | 47940125 | promoter-1promoter-1   | 16      | NM_03005 | 68214  | Gsto2   | 1700020F0  |
| chr5  | 1.38E+08 | 1.38E+08 | intron (NM CpG-11668   | 351     | NM_03140 | 83701  | Srrt    | 2810019G0  |
| chr5  | 67655277 | 67655550 | intron (NM intron (NM  | 3609    | NM_03010 | 67878  | Tmem33  | 1110006G0  |
| chr11 | 1.16E+08 | 1.16E+08 | Intergenic Intergenic  | -13174  | NM_00117 | 20698  | Sphk1   | 1110006G2  |
| chr5  | 1.37E+08 | 1.37E+08 | Intergenic RMER3D-ir   | -12919  | NM_00116 | 66437  | Fis1    | 2010003O1  |
| chr6  | 90666452 | 90666575 | promoter-1promoter-1   | 10      | NM_00113 | 232227 | Iqsec1  | AW561907   |
| chr2  | 58176752 | 58176950 | intron (NM intron (NM  | 367     | NM_00103 | 269275 | Acvr1c  | ACVRLK7 A  |
| chr12 | 99613477 | 99613800 | Intergenic Lx8 LINE L  | 106793  | NM_00815 | 14744  | Gpr65   | Dig1 Gpcr2 |
| chr6  | 83005852 | 83005950 | exon (NM exon (NM_     | 1254    | NM_00751 | 11993  | Aup1    | AA589454   |
| chr2  | 1.18E+08 | 1.18E+08 | Intergenic Intergenic  | -134720 | NM_01158 | 21825  | Thbs1   | TSP-1 TSP1 |
| chr4  | 88510652 | 88510850 | Intergenic Intergenic  | 14760   | NM_01050 | 15962  | Ifna1   | Ifa1       |
| chr2  | 1.2E+08  | 1.2E+08  | intron (NM intron (NM  | 16253   | NM_01194 | 26390  | Mapkbp1 | 2810483F2  |
| chr12 | 86940452 | 86940725 | promoter-1promoter-1   | 222     | NM_03088 | 81703  | Jdp2    | Jundm2 Ju  |
| chr2  | 1.03E+08 | 1.03E+08 | Intergenic Intergenic  | -65879  | NM_00103 | 12505  | Cd44    | AU023126   |
| chr12 | 60320552 | 60321025 | promoter-1promoter-1   | -318    | NM_00103 | 70611  | Fbxo33  | 5730501N2  |

|       |          |          |            |            |         |          |        |           |            |
|-------|----------|----------|------------|------------|---------|----------|--------|-----------|------------|
| chr5  | 50008852 | 50009050 | Intergenic | Intergenic | -332053 | NM_00119 | 80334  | Kcnip4    | AV032399   |
| chr16 | 16073377 | 16073775 | intron (NM | intron (NM | 73368   | NM_14606 | 224008 | Spidr     | 2310008HC  |
| chr10 | 90671952 | 90672275 | Intergenic | Intergenic | -37749  | NM_00108 | 21917  | Tmpo      | 5630400D2  |
| chr17 | 26708352 | 26708700 | intron (NM | intron (NM | 10069   | NM_02617 | 67458  | Ergic1    | 1200007D1  |
| chr2  | 1.67E+08 | 1.67E+08 | intron (NM | CpG        | 217     | NM_17837 | 77031  | Slc9a8    | 1200006P1  |
| chr15 | 75706552 | 75706750 | Intergenic | Intergenic | 12502   | NM_00128 | 223645 | Mroh6     | Gm19570    |
| chr6  | 1.31E+08 | 1.31E+08 | promoter-1 | promoter-1 | 86      | NM_02556 | 66441  | Magohb    | 2010012C1  |
| chr12 | 80273427 | 80273600 | promoter-1 | promoter-1 | -68     | NM_01680 | 53612  | Vti1b     | AU015348   |
| chr8  | 87185552 | 87185750 | 3' UTR (NM | 3' UTR (NM | 1100    | NM_01049 | 15936  | Ier2      | AI317238   |
| chr19 | 45332527 | 45332600 | Intergenic | Intergenic | -22837  | NM_01069 | 16814  | Lbx1      | Lbx1h      |
| chr12 | 1.12E+08 | 1.12E+08 | Intergenic | Intergenic | -10108  | NM_01048 | 15519  | Hsp90aa1  | 86kDa 89k  |
| chr14 | 76552577 | 76552725 | Intergenic | tRNA-Glu-C | 41953   | NM_01374 | 27275  | Nufip1    | Nufip      |
| chr12 | 86114427 | 86114550 | promoter-1 | promoter-1 | 268     | NM_02886 | 74316  | Isca2     | 0710001CC  |
| chr7  | 1.26E+08 | 1.26E+08 | Intergenic | ORR1D2 L   | -8374   | NM_00103 | 319622 | Itpripl2  | C130081G2  |
| chr11 | 1.21E+08 | 1.21E+08 | intron (NM | CpG        | 223     | NM_02579 | 66840  | Wdr45b    | 0610008N2  |
| chr4  | 1.29E+08 | 1.29E+08 | Intergenic | (TG)n Sim  | -12017  | NM_01689 | 11637  | Ak2       | Ak-2 D4Er  |
| chr15 | 63828202 | 63828350 | intron (NM | intron (NM | 63734   | NM_14484 | 223601 | Fam49b    | 0910001AC  |
| chr14 | 55172977 | 55173150 | 5' UTR (NM | 5' UTR (NM | 135     | NM_14546 | 219072 | Haus4     | 9430093HC  |
| chr11 | 1.19E+08 | 1.19E+08 | Intergenic | Intergenic | -15649  | NM_01392 | 30951  | Cbx8      | Pc3        |
| chr3  | 88489777 | 88489925 | intron (NM | CpG        | 135     | NM_02881 | 74200  | 2810403AC | A430106P1  |
| chr3  | 1.08E+08 | 1.08E+08 | intron (NM | intron (NM | 494     | NM_00128 | 72522  | Atxn7I2   | 2610528J1  |
| chr11 | 87860902 | 87861125 | 5' UTR (NM | 5' UTR (NM | 138     | NM_17337 | 110809 | Srsf1     | 1110054N1  |
| chr11 | 4603302  | 4603475  | intron (NM | B1_Mur4 S  | 959     | NM_19797 | 66152  | Uqcr10    | 1110020P1  |
| chr8  | 90722852 | 90722925 | promoter-1 | promoter-1 | -224    | NM_00116 | 214627 | Papd5     | 5730445M   |
| chr17 | 6406177  | 6406325  | Intergenic | Intergenic | -23009  | NM_00934 | 21648  | Dynlt1b   | AGS2 Dytl  |
| chr6  | 72849277 | 72849350 | intron (NM | CpG        | 660     | NM_01971 | 74287  | Kcmf1     | 1700094M   |
| chr10 | 40021452 | 40021550 | intron (NM | CpG        | 491     | NM_00744 | 1E+08  | Amd2      | AdoMetDC   |
| chr7  | 1.46E+08 | 1.46E+08 | promoter-1 | promoter-1 | 32      | NM_02639 | 52432  | Ppp2r2d   | 1300017E1  |
| chr9  | 1.14E+08 | 1.14E+08 | intron (NM | PB1D10 SI  | 2731    | NM_17862 | 72179  | Fbxl2     | 2810423A2  |
| chr10 | 59406452 | 59406625 | Intergenic | Intergenic | 7980    | NM_02908 | 74747  | Ddit4     | 5830413E0  |
| chr7  | 66042927 | 66043150 | intron (NM | intron (NM | 129466  | NM_00972 | 11982  | Atp10a    | Atp10c pfa |
| chr5  | 33616852 | 33616950 | intron (NM | CpG        | 752     | NM_00119 | 13016  | Ctbp1     | BARS CtBP  |
| chr11 | 79788377 | 79788650 | Intergenic | HAL1 LINE  | -12624  | NM_14482 | 216987 | Utp6      | 4732497OC  |
| chr10 | 41777402 | 41777550 | Intergenic | Intergenic | -39288  | NM_00103 | 213402 | Armc2     | 261001810! |
| chr15 | 99803077 | 99803200 | promoter-1 | promoter-1 | -73     | NM_00102 | 207214 | Larp4     | DXErtd793  |
| chr5  | 1.22E+08 | 1.22E+08 | intron (NM | B3A SINE   | 12883   | NM_00912 | 20239  | Atxn2     | 9630045M   |
| chr3  | 51220027 | 51220175 | 5' UTR (NM | 5' UTR (NM | 163     | NM_05308 | 74838  | Naa15     | 5730450D1  |
| chr1  | 1.93E+08 | 1.93E+08 | Intergenic | Intergenic | 47946   | NM_02542 | 66208  | Nenf      | 1110060M   |
| chr10 | 53608327 | 53608500 | Intergenic | LTR33A LT  | -137698 | NM_00108 | 75906  | Fam184a   | 3110012E0  |
| chr2  | 27370827 | 27371100 | intron (NM | CpG        | 296     | NM_08084 | 140858 | Wdr5      | 2410008OC  |
| chr12 | 81537727 | 81537800 | promoter-1 | promoter-1 | -175    | NM_17726 | 320808 | Dcaf5     | 9430020BC  |
| chr3  | 40599252 | 40599400 | Intergenic | Intergenic | -4547   | NM_17316 | 20873  | Plk4      | 1700028H2  |
| chr15 | 8363352  | 8363425  | intron (NM | MTE2b LTI  | 31075   | NM_02770 | 71175  | Nipbl     | Idn3       |
| chr3  | 95622877 | 95623125 | promoter-1 | promoter-1 | -125    | NM_00108 | 75137  | Rprd2     | 2810036A1  |
| chr10 | 77478127 | 77478250 | Intergenic | Intergenic | -5647   | NM_00882 | 18641  | Pfkl      | AA407869   |
| chr14 | 75469052 | 75469350 | Intergenic | Intergenic | 53367   | NM_19864 | 271221 | 5031414D1 | Gm744 Gn   |
| chr3  | 51100827 | 51100975 | intron (NM | intron (NM | -19465  | NM_00129 | 69257  | Elf2      | 2610036A2  |

|       |          |          |            |            |         |          |        |          |            |
|-------|----------|----------|------------|------------|---------|----------|--------|----------|------------|
| chr11 | 67340152 | 67340400 | Intergenic | Intergenic | -6224   | NM_00808 | 14457  | Gas7     | AW124766   |
| chr8  | 96982477 | 96982675 | Intergenic | Intergenic | -14087  | NM_00103 | 434341 | Nlrc5    | AI451557   |
| chr19 | 27161952 | 27162125 | Intergenic | Intergenic | -129472 | NM_01370 | 22359  | Vldlr    | AA408956   |
| chr10 | 1.11E+08 | 1.11E+08 | intron (NM | intron (NM | 10512   | NM_17861 | 52705  | Krr1     | 2610511F0  |
| chr4  | 1.39E+08 | 1.39E+08 | promoter-1 | promoter-1 | 6       | NM_02985 | 77056  | Tmco4    | 4632413C1  |
| chr9  | 4308952  | 4309200  | promoter-1 | promoter-1 | 418     | NM_02627 | 67618  | Aasdhppt | 2010309J2  |
| chr1  | 1.73E+08 | 1.73E+08 | intron (NM | B1_Mus2    | -7965   | NM_00100 | 226652 | Arhgap30 | 6030405PC  |
| chr3  | 1.03E+08 | 1.03E+08 | Intergenic | Charlie12  | 85410   | NM_00107 | 94093  | Trim33   | 8030451NC  |
| chr9  | 36504002 | 36504200 | intron (NM | intron (NM | 3296    | NM_00739 | 11451  | Acrv1    | Msa63 SP-  |
| chr9  | 31088477 | 31088725 | Intergenic | CpG        | 9615    | NM_00110 | 638580 | Gm7244   | EG638580   |
| chr4  | 1.33E+08 | 1.33E+08 | Intergenic | MER53 DN   | -18644  | NM_00101 | 503610 | Zdhhc18  | -          |
| chr15 | 76307927 | 76308075 | promoter-1 | promoter-1 | 126     | NM_00829 | 15499  | Hsf1     | AA960185   |
| chr3  | 1.1E+08  | 1.1E+08  | intron (NM | intron (NM | 182427  | NM_00116 | 80883  | Ntng1    | A930010CC  |
| chr13 | 36180152 | 36180325 | intron (NM | intron (NM | 28988   | NM_20135 | 380840 | Lymr4    | BC034664   |
| chr6  | 54987602 | 54987775 | promoter-1 | promoter-1 | -307    | NM_18067 | 353172 | Gars     | GENA202    |
| chr16 | 21857777 | 21858000 | Intergenic | Intergenic | -34154  | NM_17282 | 71751  | Map3k13  | C130026N:  |
| chr11 | 29274102 | 29274175 | promoter-1 | promoter-1 | -34     | NM_17684 | 108686 | Ccdc88a  | A430106J1  |
| chr3  | 94820327 | 94820525 | Intergenic | Intergenic | -1266   | NM_03007 | 78266  | Zfp687   | 4931408L0  |
| chr4  | 12016952 | 12017300 | intron (NM | CpG-9742   | 609     | NM_19895 | 77604  | Rbm12b2  | AV299215   |
| chr19 | 33001177 | 33001375 | Intergenic | Intergenic | 169209  | NM_00896 | 19211  | Pten     | 2310035OC  |
| chr17 | 31345177 | 31345350 | intron (NM | intron (NM | 252     | NM_17782 | 328795 | Ubash3a  | 5830413CC  |
| chr7  | 1.46E+08 | 1.46E+08 | Intergenic | Intergenic | -1424   | NM_00976 | 12176  | Bnip3    | Nip3       |
| chr5  | 73211427 | 73211625 | intron (NM | intron (NM | 48161   | NM_00111 | 21682  | Tec      | -          |
| chr11 | 54347477 | 54347550 | intron (NM | RLTR14 LT  | 11166   | NM_00125 | 192786 | Rapgef6  | A530068KC  |
| chr1  | 74331027 | 74331100 | promoter-1 | promoter-1 | 249     | NM_14611 | 227290 | Aamp     | AU040907   |
| chr5  | 43517077 | 43517300 | Intergenic | Intergenic | -107514 | NM_17593 | 231207 | Cpeb2    | A630055H:  |
| chr3  | 51504577 | 51504750 | intron (NM | intron (NM | 39548   | NM_17499 | 211666 | Mgst2    | GST2 MGS   |
| chr19 | 6061327  | 6061425  | exon (NM_  | exon (NM_  | 169     | NM_01385 | 29805  | Znhit2   | C11orf5 Fc |
| chr4  | 1.45E+08 | 1.45E+08 | intron (NM | B1_Mur1    | 6372    | NM_01161 | 21938  | Tnfrsf1b | CD120b TM  |
| chr19 | 41338077 | 41338175 | intron (NM | CpG        | 368     | NM_13335 | 107358 | Tm9sf3   | 1810073M   |
| chr8  | 80299552 | 80299650 | Intergenic | L1MB5 LIN  | -51250  | NM_01033 | 13617  | Ednra    | ET-AR ETa  |
| chr4  | 1.48E+08 | 1.48E+08 | intron (NM | intron (NM | 44120   | NM_01978 | 56273  | Pex14    | Pex14p R7  |
| chr4  | 1.55E+08 | 1.55E+08 | intron (NM | intron (NM | 5231    | NM_01138 | 20481  | Ski      | 231001210: |
| chr4  | 4007377  | 4007675  | Intergenic | Intergenic | -2865   | NM_00108 | 242286 | Sdr16c6  | 4833413O:  |
| chr4  | 34423377 | 34423575 | Intergenic | Intergenic | -74388  | NM_00100 | 433693 | Akirin2  | 2700059D:  |
| chr16 | 36071202 | 36071475 | promoter-1 | promoter-1 | 263     | NM_02734 | 70186  | Fam162a  | 2310056PC  |
| chr9  | 50812277 | 50812450 | intron (NM | intron (NM | 4815    | NM_17871 | 235344 | Sik2     | G630080D:  |
| chr4  | 98787427 | 98787525 | 5' UTR (NV | 5' UTR (NV | 130     | NM_00129 | 67299  | Dock7    | 3110056M   |
| chr9  | 78073127 | 78073325 | Intergenic | Intergenic | -5250   | NM_00818 | 14857  | Gsta1    | Gst2-1 OT  |
| chr14 | 55725002 | 55725300 | TTS (NM_1  | TTS (NM_1  | 279     | NM_00745 | 11766  | Ap1g2    | Adtg2 G2a  |
| chr7  | 34951952 | 34952025 | intron (NM | RSINE1 SIN | 1560    | NM_01668 | 50995  | Uba2     | AA986091   |
| chr4  | 53163427 | 53163575 | intron (NM | intron (NM | 9266    | NM_01345 | 11303  | Abca1    | ABC-1 Abc  |
| chr8  | 1.12E+08 | 1.12E+08 | promoter-1 | promoter-1 | -19     | NM_02801 | 71955  | Ist1     | 2400003C1  |
| chr9  | 66766777 | 66766950 | intron (NM | intron (NM | 649     | NM_17341 | 235442 | Rab8b    | 5930437D1  |
| chr15 | 76701552 | 76701750 | 5' UTR (NV | 5' UTR (NV | 214     | NM_00100 | 71591  | Zfp251   | 9130001M   |
| chr1  | 1.73E+08 | 1.73E+08 | intron (NM | intron (NM | 2589    | NM_01872 | 18106  | Cd244    | 2B4 C9.1 I |
| chr4  | 1.03E+08 | 1.03E+08 | promoter-1 | promoter-1 | -24     | NM_17773 | 242585 | Slc35d1  | AI834976   |

|       |          |          |            |            |        |           |        |            |             |
|-------|----------|----------|------------|------------|--------|-----------|--------|------------|-------------|
| chr10 | 1.2E+08  | 1.2E+08  | TTS (NM_0  | TTS (NM_0  | -28317 | NM_08044  | 117599 | Helb       | AI447783 I  |
| chr2  | 1.53E+08 | 1.53E+08 | intron (NM | intron (NM | 9629   | NM_02554  | 66405  | Mcts2      | 2400002F1   |
| chr12 | 33725702 | 33725825 | intron (NM | intron (NM | 51977  | NM_00102  | 68764  | Cdhr3      | 1110049BC   |
| chr11 | 88962552 | 88962675 | Intergenic | Intergenic | 27458  | NM_00103  | 217071 | Gm525      | -           |
| chr11 | 69664627 | 69664750 | non-coding | non-coding | 4542   | NR_033133 | 70310  | Plscr3     | 2210403O2   |
| chr4  | 74121827 | 74122025 | Intergenic | Intergenic | 224143 | NM_14478  | 76804  | Kdm4c      | 2410141F1   |
| chr17 | 46889077 | 46889275 | promoter-1 | promoter-1 | -15    | NM_02806  | 72029  | Cnpy3      | 1600025D1   |
| chr5  | 1.49E+08 | 1.49E+08 | Intergenic | Intergenic | -22299 | NM_01022  | 14254  | Flt1       | AI323757 I  |
| chr2  | 32463002 | 32463175 | intron (NM | intron (NM | 583    | NR_110347 | 50935  | St6galnac6 | ST6GalNAc   |
| chr3  | 57267427 | 57267525 | exon (NM_  | exon (NM_  | 38144  | NM_14553  | 229302 | Tm4sf4     | lltmp       |
| chr17 | 32457327 | 32457525 | TTS (NM_0  | TTS (NM_0  | 672    | NM_01977  | 56399  | Akap8      | 1200016AC   |
| chr9  | 1.08E+08 | 1.08E+08 | Intergenic | Intergenic | -3154  | NM_00129  | 20347  | Sema3b     | Sema Sem    |
| chr16 | 32550227 | 32550350 | Intergenic | Intergenic | 53921  | NM_19930  | 245308 | Zdhhc19    | Gm1744 G    |
| chr13 | 51805977 | 51806075 | intron (NM | intron (NM | 58943  | NM_02927  | 75420  | Secisbp2   | 2210413NC   |
| chr14 | 65256277 | 65256475 | Intergenic | Intergenic | -14992 | NM_00108  | 16554  | Kif13b     | 5330429L1   |
| chr11 | 1.2E+08  | 1.2E+08  | intron (NM | intron (NM | 1208   | NM_13379  | 192662 | Arhgdia    | 5330430M    |
| chr8  | 1.25E+08 | 1.25E+08 | Intergenic | Intergenic | -3171  | NM_01391  | 30927  | Snai3      | AI643946 I  |
| chr19 | 46975727 | 46976275 | intron (NM | intron (NM | 60840  | NM_02981  | 76952  | Nt5c2      | 2010002I2   |
| chr17 | 50514927 | 50515050 | Intergenic | MER20 DN   | -82043 | NM_00127  | 13164  | Dazl       | Daz-like Da |
| chr9  | 15514127 | 15514375 | promoter-1 | promoter-1 | 38     | NM_17228  | 234967 | Slc36a4    | 6330573I1   |
| chr6  | 52916202 | 52916275 | intron (NM | intron (NM | -56624 | NM_00116  | 231986 | Jazf1      | AI591476 I  |
| chr3  | 88230127 | 88230325 | Intergenic | MTD LTR I  | -1163  | NM_00114  | 229517 | Slc25a44   | 6720482A1   |
| chr15 | 84753752 | 84753975 | promoter-1 | promoter-1 | 5      | NM_01671  | 18141  | Nup50      | 1700030KC   |
| chr9  | 1.15E+08 | 1.15E+08 | intron (NM | CpG        | 367    | NM_17538  | 333433 | Gpd1l      | 2210409H2   |
| chr12 | 1.02E+08 | 1.02E+08 | promoter-1 | promoter-1 | -563   | NM_15358  | 73086  | Rps6ka5    | 3110005L1   |
| chr6  | 1.37E+08 | 1.37E+08 | exon (NM_  | exon (NM_  | 239    | NM_17565  | 320332 | Hist4h4    | B130044JO   |
| chr9  | 65062402 | 65062650 | promoter-1 | promoter-1 | 29     | NM_17746  | 214424 | Parp16     | ARTD15 B    |
| chr2  | 59924352 | 59924600 | intron (NM | intron (NM | 39321  | NM_00100  | 407823 | Baz2b      | 5830435C1   |
| chr1  | 1.81E+08 | 1.81E+08 | promoter-1 | promoter-1 | 535    | NM_00824  | 15278  | Tfb2m      | Hkp1        |
| chr13 | 16027602 | 16028175 | Intergenic | Intergenic | -78420 | NM_00838  | 16323  | Inhba      | -           |
| chr6  | 99162452 | 99162625 | intron (NM | intron (NM | 53971  | NM_00119  | 108655 | Foxp1      | 3110052D1   |
| chr12 | 77938627 | 77938725 | intron (NM | CpG        | 222    | NM_14592  | 110606 | Fntb       | 2010013E1   |
| chr1  | 72335152 | 72335350 | intron (NM | B4 SINE B  | 4304   | NM_17556  | 271711 | Tmem169    | A830020BC   |
| chr8  | 1.18E+08 | 1.18E+08 | Intergenic | Intergenic | -11894 | NM_00102  | 17132  | Maf        | 2810401A2   |
| chr1  | 5073227  | 5073525  | intron (NM | CpG        | 122    | NM_13382  | 108664 | Atp6v1h    | 0710001F1   |
| chr3  | 54916127 | 54916300 | 5' UTR (NV | 5' UTR (NV | 125    | NM_00114  | 229285 | Spg20      | AI840044 I  |
| chr2  | 75776627 | 75776900 | promoter-1 | promoter-1 | -244   | NM_02823  | 72421  | Ttc30b     | 2510042PC   |
| chr5  | 32424377 | 32424575 | Intergenic | Intergenic | -14369 | NM_00803  | 14284  | Fosl2      | Fra-2       |
| chr1  | 1.64E+08 | 1.64E+08 | Intergenic | Intergenic | -23684 | NM_17264  | 226551 | Suco       | 4732491B1   |
| chr3  | 65470202 | 65470425 | intron (NM | CpG        | 163    | NM_00116  | 624866 | Lekr1      | EG546798    |
| chr6  | 72340102 | 72340475 | intron (NM | intron (NM | 373    | NM_01679  | 22320  | Vamp8      | AU041171    |
| chr1  | 88467977 | 88468325 | intron (NM | intron (NM | 10925  | NM_00880  | 18582  | Pde6d      | AI841218 I  |
| chr5  | 23032702 | 23032925 | intron (NM | intron (NM | 89576  | NM_00927  | 20817  | Srpk2      | AW226533    |
| chr5  | 1.39E+08 | 1.39E+08 | Intergenic | RMER15 L   | -47359 | NM_03056  | 80752  | Fam20c     | C76981 DM   |
| chr1  | 22744202 | 22744800 | intron (NM | intron (NM | 68062  | NM_00101  | 116837 | Rims1      | C030033M    |
| chr12 | 3441302  | 3441575  | intron (NM | intron (NM | 14581  | NM_17242  | 75302  | Asxl2      | 4930556B1   |
| chr6  | 29297877 | 29297950 | promoter-1 | promoter-1 | -193   | NM_00759  | 12321  | Calu       | 9530075H2   |

|       |          |          |            |            |        |          |        |           |            |
|-------|----------|----------|------------|------------|--------|----------|--------|-----------|------------|
| chr18 | 66600927 | 66601025 | Intergenic | URR1B DN   | -17282 | NM_02145 | 58801  | Pmaip1    | Noxa       |
| chr14 | 98504002 | 98504175 | intron (NM | intron (NM | 64896  | NM_00103 | 13134  | Dach1     | Dac Dach   |
| chr13 | 96669852 | 96670025 | Intergenic | Intergenic | -8061  | NM_02771 | 544963 | Iqgap2    | 4933417J2  |
| chr8  | 1.05E+08 | 1.05E+08 | Intergenic | Intergenic | 266460 | NM_00986 | 12552  | Cdh11     | Cad11      |
| chr18 | 47019177 | 47019400 | intron (NM | intron (NM | 9595   | NM_02900 | 74574  | 4833403I1 | Aqpep Lvri |
| chr19 | 5366427  | 5366875  | promoter-1 | promoter-1 | -162   | NM_02723 | 69860  | Eif1ad    | 2010003J0  |
| chr2  | 1.52E+08 | 1.52E+08 | promoter-1 | promoter-1 | -725   | NM_00778 | 12995  | Csnk2a1   | Csnk2a1-rs |
| chr4  | 1.26E+08 | 1.26E+08 | Intergenic | Intergenic | -6802  | NR_04556 | 12986  | Csf3r     | Cd114 Csf3 |
| chr9  | 42679827 | 42680050 | intron (NM | intron (NM | 72516  | NM_17548 | 110637 | Grik4     | 6330551KC  |
| chr2  | 22957902 | 22958050 | intron (NM | Lx8 LINE L | 33384  | NM_00110 | 74159  | Acbd5     | 1300014E1  |
| chr17 | 3115127  | 3115400  | 5' UTR (NM | 5' UTR (NM | 291    | NM_13412 | 106583 | Scaf8     | A630086M   |
| chr11 | 52174052 | 52174125 | promoter-1 | promoter-1 | -529   | NM_01169 | 22333  | Vdac1     | AL033343   |
| chr10 | 6648652  | 6648925  | Intergenic | Intergenic | -42624 | NM_00115 | 213783 | Plekhg1   | D10ErtD73  |
| chr17 | 26122277 | 26122350 | Intergenic | CpG        | -19863 | NM_01583 | 50817  | Capn15    | Solh       |
| chr10 | 13702902 | 13703025 | intron (NM | intron (NM | 16778  | NM_01043 | 15273  | Hivep2    | MIBP1 Sch  |
| chr9  | 1.06E+08 | 1.06E+08 | intron (NM | intron (NM | 1507   | NM_19893 | 67905  | Ppm1m     | 2810423O1  |
| chr9  | 24307452 | 24307525 | promoter-1 | promoter-1 | 96     | NM_17292 | 244745 | Dpy19l1   | 11000011l1 |
| chr2  | 1.58E+08 | 1.58E+08 | Intergenic | Intergenic | -16998 | NM_00937 | 21817  | Tgm2      | G[a]h TG2  |
| chr4  | 1.16E+08 | 1.16E+08 | promoter-1 | promoter-1 | -444   | NM_02986 | 77110  | Gpbp1l1   | 5330440M   |
| chr13 | 45446877 | 45447075 | Intergenic | Intergenic | -38135 | NM_15378 | 218203 | Mylip     | 9430057C2  |
| chr5  | 1.51E+08 | 1.51E+08 | intron (NM | CpG        | 149    | NM_17531 | 100710 | Pds5b     | AI646570   |
| chr13 | 76155777 | 76155850 | 5' UTR (NM | 5' UTR (NM | 197    | NM_17891 | 218341 | Rfesd     | AI256775   |
| chr10 | 79834577 | 79835175 | Intergenic | Intergenic | 15520  | NM_19861 | 237400 | Mex3d     | BC059858   |
| chr8  | 1.08E+08 | 1.08E+08 | 5' UTR (NM | 5' UTR (NM | 210    | NM_02151 | 59016  | Thap11    | 2810036E2  |
| chr12 | 1.09E+08 | 1.09E+08 | promoter-1 | promoter-1 | 15     | NM_00983 | 12454  | Ccnk      | AW123198   |
| chr5  | 1.26E+08 | 1.26E+08 | intron (NM | CpG        | 399    | NM_01963 | 22190  | Ubc       | 2700054O0  |
| chr2  | 38341477 | 38341650 | Intergenic | Intergenic | -25654 | NM_02160 | 59126  | Nek6      | 1300007CC  |
| chr5  | 1.43E+08 | 1.43E+08 | Intergenic | CpG        | -33838 | NM_19906 | 17425  | Foxk1     | A630048H0  |
| chr11 | 81820377 | 81820525 | Intergenic | Intergenic | -28628 | NM_01133 | 20296  | Ccl2      | AI323594   |
| chr1  | 75208527 | 75208625 | exon (NM_  | exon (NM_  | 1172   | NM_01149 | 20872  | Stk16     | EDPK Krc1  |
| chr19 | 5024202  | 5024275  | 5' UTR (NM | 5' UTR (NM | 232    | NM_00785 | 13340  | Slc29a2   | Der12 Ent1 |
| chr15 | 74786377 | 74786525 | intron (NM | intron (NM | 915    | NM_00116 | 17069  | Ly6e      | 9804 Ly67  |
| chr11 | 68912277 | 68912400 | promoter-1 | promoter-1 | -120   | NM_01106 | 18626  | Per1      | Per m-rigu |
| chr2  | 52717227 | 52717325 | exon (NM_  | exon (NM_  | 374    | NM_17240 | 71409  | Fmnl2     | 5430425KC  |
| chr9  | 32464477 | 32464550 | Intergenic | Intergenic | -39114 | NM_01180 | 23871  | Ets1      | AI196000   |
| chr4  | 1.4E+08  | 1.4E+08  | intron (NM | CpG        | 563    | NM_17386 | 108911 | Rcc2      | 2610510HC  |
| chr3  | 30992502 | 30993050 | Intergenic | CpG        | -1204  | NM_01138 | 20482  | Skil      | Skir SnoN  |
| chr17 | 28622527 | 28622750 | intron (NM | CpG        | 456    | NM_01022 | 14229  | Fkbp5     | D17ErtD59  |
| chr7  | 1.34E+08 | 1.34E+08 | promoter-1 | promoter-1 | -403   | NM_00926 | 20768  | Seps2     | Sps2 Ysg3  |
| chr6  | 38303627 | 38303900 | intron (NM | URR1B DN   | 840    | NM_02886 | 78781  | Zc3hav1   | 1200014N1  |
| chr2  | 1.57E+08 | 1.57E+08 | Intergenic | Intergenic | -37699 | NM_02998 | 77799  | Sla2      | A930009E2  |
| chr3  | 1.16E+08 | 1.16E+08 | intron (NM | intron (NM | 25799  | NM_00108 | 229776 | Cdc14a    | A830059A1  |
| chr15 | 99328652 | 99328775 | 3' UTR (NM | 3' UTR (NM | -23552 | NM_02923 | 75284  | Bcdin3d   | 4930556PC  |
| chr1  | 1.61E+08 | 1.61E+08 | intron (NM | intron (NM | 1319   | NM_01193 | 26374  | Rfwd2     | AI316802   |
| chr4  | 1.55E+08 | 1.55E+08 | Intergenic | Intergenic | -1144  | NM_01138 | 20481  | Ski       | 2310012I0  |
| chr11 | 4943052  | 4943200  | TTS (NM_0  | TTS (NM_0  | -15005 | NM_14521 | 75668  | Ras10a    | 2210403B1  |
| chrX  | 10294052 | 10294150 | promoter-1 | promoter-1 | -390   | NM_02652 | 68041  | Mid1ip1   | 3110038L0  |

|       |          |          |               |            |         |           |        |          |            |
|-------|----------|----------|---------------|------------|---------|-----------|--------|----------|------------|
| chr6  | 1.15E+08 | 1.15E+08 | Intergenic    | Intergenic | -21346  | NM_19903  | 381802 | Tsen2    | AU067695   |
| chr6  | 5149877  | 5150100  | Intergenic    | Intergenic | -6042   | NM_01113  | 18979  | Pon1     | Pon        |
| chr2  | 1.57E+08 | 1.57E+08 | Intergenic    | RMER15 L   | -1468   | NM_00113  | 19650  | Rbl1     | AW547426   |
| chr16 | 57606902 | 57607150 | promoter-1    | promoter-1 | -46     | NM_02559  | 66497  | Cmss1    | 1110001AC  |
| chr12 | 81564077 | 81564375 | 5' UTR (NM    | 5' UTR (NM | 144     | NM_13379  | 97827  | Exd2     | 4930539P1  |
| chr10 | 86242252 | 86242400 | intron (NM    | intron (NM | 576     | NM_17533  | 103466 | Nt5dc3   | AU040402   |
| chr2  | 24817902 | 24818025 | promoter-1    | promoter-1 | 21      | NM_02604  | 67228  | Dph7     | 2810443J1  |
| chr2  | 61383577 | 61383875 | Intergenic    | Intergenic | -32917  | NM_01152  | 21353  | Tank     | C86182 E4  |
| chr2  | 1.46E+08 | 1.46E+08 | intron (NM    | intron (NM | 35899   | NM_02872  | 74030  | Rin2     | 2010003K1  |
| chr7  | 1.52E+08 | 1.52E+08 | exon (NM_     | exon (NM_  | 153     | NM_01017  | 14082  | Fadd     | Mort1/FAC  |
| chr15 | 93228752 | 93229000 | promoter-1    | promoter-1 | -19     | NM_00128  | 223828 | Pphln1   | CR HSPC2C  |
| chr13 | 43071577 | 43071775 | intron (NM    | MIR SINE   | -146532 | NM_00100  | 218194 | Phactr1  | 9630030F1  |
| chr4  | 1.06E+08 | 1.06E+08 | exon (NM_     | exon (NM_  | 345     | NM_18322  | 329908 | Usp24    | 2700066KC  |
| chr16 | 23927802 | 23927975 | intron (NM    | intron (NM | 2992    | NM_00100  | 224055 | Rtp2     | Gm605      |
| chrX  | 9040002  | 9040075  | intron (NM    | intron (NM | 6412    | NM_00780  | 13058  | Cybb     | C88302 CC  |
| chr2  | 19310127 | 19310200 | intron (NM    | intron (NM | 16900   | NM_02961  | 76467  | Msr2     | 2310050L0  |
| chr18 | 50139927 | 50140325 | intron (NM    | intron (NM | 1045    | NM_00117  | 106869 | Tnfaip8  | AA987150   |
| chr14 | 1.06E+08 | 1.06E+08 | Intergenic    | Intergenic | -1215   | NM_01189  | 24064  | Spry2    | sprouty2   |
| chr8  | 48619052 | 48619250 | promoter-1    | promoter-1 | 152     | NM_20350  | 192174 | Rwdd4a   | BC016198   |
| chr11 | 71854952 | 71855100 | promoter-1    | promoter-1 | -978    | NM_14452  | 109212 | Fam64a   | 2610008F0  |
| chr10 | 17205977 | 17206125 | Intergenic    | MIRc SINE  | -236983 | NM_01082  | 17684  | Cited2   | AI835299 I |
| chr2  | 90418102 | 90418275 | intron (NM    | intron (NM | 2616    | NM_00898  | 19271  | Ptprj    | AI450271 I |
| chr11 | 9600727  | 9601050  | Intergenic    | Intergenic | 508943  | NM_17825  | 268379 | Abca13   | 9830132L2  |
| chr17 | 34254127 | 34257000 | exon (NM_     | exon (NM_  | 1282    | NR_03797C | 14312  | Brd2     | AW228947   |
| chr4  | 48565677 | 48565850 | intron (NM    | intron (NM | 12392   | NM_02813  | 66665  | Msantd3  | 2410046L1  |
| chr13 | 99714827 | 99714975 | Intergenic    | Intergenic | -18562  | NM_17871  | 238799 | Tnp1     | AU021749   |
| chr7  | 17004077 | 17004650 | intron (NM    | intron (NM | 17818   | NM_19863  | 330474 | Zc3h4    | Bwq1 Gm7   |
| chr5  | 1.24E+08 | 1.24E+08 | intron (NML2a | LINE L     | 6575    | NM_17509  | 23912  | Rhof     | AI845056 , |
| chr4  | 1.32E+08 | 1.32E+08 | intron (NM    | intron (NM | 428     | NM_00103  | 230787 | Themis2  | ICB-1      |
| chr10 | 67491102 | 67491325 | intron (NM    | intron (NM | 48867   | NM_00108  | 170799 | Rtkn2    | B130039D2  |
| chr9  | 72297402 | 72297500 | intron (NM    | intron (NM | 11115   | NM_00861  | 17427  | Mns1     | AW546487   |
| chr17 | 35074927 | 35075150 | TTS (NM_0     | TTS (NM_0  | 6840    | NM_01089  | 18010  | Neu1     | AA407268   |
| chr14 | 31364277 | 31364350 | intron (NM    | intron (NM | 1996    | NM_00938  | 21881  | Tkt      | p68        |
| chr6  | 16915302 | 16915575 | Intergenic    | Intergenic | -66997  | NM_03119  | 21426  | Tfec     | BB107417   |
| chr6  | 30643327 | 30643725 | intron (NM    | CpG        | 156     | NM_03199  | 83922  | Cep41    | 1700017E1  |
| chr15 | 36264602 | 36264700 | Intergenic    | Intergenic | -51749  | NM_01392  | 30945  | Rnf19a   | AA032313   |
| chr2  | 29980052 | 29980300 | promoter-1    | promoter-1 | -45     | NM_00129  | 227693 | Zer1     | C230075L1  |
| chr14 | 31832702 | 31832775 | promoter-1    | promoter-1 | 414     | NM_00108  | 66923  | Pbrm1    | 2610016F0  |
| chr16 | 33921652 | 33921950 | intron (NM    | 7SK RNA F  | 45288   | NM_00947  | 22247  | Umps     | 1700095D2  |
| chr7  | 1.07E+08 | 1.07E+08 | intron (NML3b | LINE C     | 9204    | NM_20135  | 233552 | Gdpd5    | BC024955   |
| chr16 | 87440702 | 87440800 | promoter-1    | promoter-1 | 86      | NM_01692  | 53858  | Rwdd2b   | ORF5       |
| chr8  | 1.09E+08 | 1.09E+08 | promoter-1    | promoter-1 | 295     | NM_00100  | 66432  | Slc7a6os | 2010007L1  |
| chr6  | 92041552 | 92042025 | intron (NM    | CpG        | 376     | NM_01163  | 22026  | Nr2c2    | TAK1 Tr4   |
| chr13 | 75916702 | 75916775 | Intergenic    | Intergenic | -60596  | NM_05310  | 93692  | Glrx     | C86710 D1  |
| chr10 | 19242202 | 19242400 | Intergenic    | Intergenic | -69463  | NM_01051  | 15979  | lfng1    | CD119 IFN  |
| chr19 | 42254477 | 42254550 | intron (NM    | intron (NM | 9456    | NM_00116  | 319740 | Zfyve27  | 2210011NC  |
| chr4  | 1.55E+08 | 1.55E+08 | intron (NM    | CpG        | 752     | NM_02689  | 68991  | Ssu72    | 1190002E2  |



|       |          |          |            |            |          |          |        |            |             |
|-------|----------|----------|------------|------------|----------|----------|--------|------------|-------------|
| chr13 | 1.12E+08 | 1.12E+08 | promoter-1 | promoter-1 | -198     | NM_17259 | 218613 | Mier3      | 5730509D1   |
| chr12 | 1.03E+08 | 1.03E+08 | Intergenic | MER2 DNA   | -44816   | NM_17215 | 238384 | Slc24a4    | A930002M    |
| chr10 | 69346852 | 69347300 | intron (NM | intron (NM | -41204   | NM_17068 | 11735  | Ank3       | 2900054DC   |
| chr17 | 74301477 | 74301775 | Intergenic | Intergenic | -2090    | NM_01172 | 22436  | Xdh        | XO Xor Xo   |
| chr6  | 48551527 | 48551775 | Intergenic | Intergenic | 7769     | NM_00107 | 58887  | Repin1     | AI425994 ,  |
| chr5  | 1.4E+08  | 1.4E+08  | Intergenic | Intergenic | -2245    | NM_17272 | 231821 | Adap1      | 4930431P1   |
| chr1  | 1.64E+08 | 1.64E+08 | Intergenic | Intergenic | -1034    | NM_17264 | 226551 | Suco       | 4732491B1   |
| chr1  | 1.23E+08 | 1.23E+08 | promoter-1 | promoter-1 | -62      | NM_13374 | 72999  | Insig2     | 290005311:  |
| chr7  | 1.06E+08 | 1.06E+08 | intron (NM | intron (NM | 710      | NM_02638 | 67800  | Dgat2      | 0610010BC   |
| chr2  | 1.8E+08  | 1.8E+08  | promoter-1 | promoter-1 | -126     | NM_13384 | 99296  | Hrh3       | AW049250    |
| chr11 | 21123627 | 21123925 | Intergenic | Intergenic | -15259   | NM_13906 | 245944 | Vps54      | Hcc8 Vps5   |
| chr8  | 1.26E+08 | 1.26E+08 | intron (NM | intron (NM | 1122     | NM_13395 | 69581  | Rhou       | 2310026M    |
| chr17 | 25716077 | 25716150 | promoter-1 | promoter-1 | -6       | NM_02962 | 76483  | Lmf1       | 2400010G1   |
| chr16 | 33169702 | 33170050 | Intergenic | RMER19B    | -15281   | NM_17684 | 106326 | Osbp11     | 9430097NC   |
| chr6  | 1.47E+08 | 1.47E+08 | Intergenic | Intergenic | -52169   | NM_00897 | 19227  | Pthlh      | PTH-like Pi |
| chr17 | 73457352 | 73457450 | promoter-1 | promoter-1 | 76       | NM_00117 | 225010 | Lclat1     | AI181996 ,  |
| chr5  | 23293552 | 23293800 | exon (NM_  | exon (NM_  | 114      | NM_17732 | 72772  | Rint1      | 1500019CC   |
| chr1  | 1.82E+08 | 1.82E+08 | intron (NM | CpG        | 983      | NM_02637 | 226747 | Ahctf1     | 6230412P2   |
| chr1  | 88050877 | 88051050 | promoter-1 | promoter-1 | -392     | NM_03018 | 78795  | Armc9      | 3830422A1   |
| chr1  | 23930852 | 23931100 | Intergenic | Intergenic | -1756    | NM_02853 | 98366  | Smap1      | 1700056O1   |
| chr17 | 24210252 | 24210525 | promoter-1 | promoter-1 | 64       | NM_02700 | 69259  | Kctd5      | 2610030NC   |
| chr17 | 18008677 | 18008925 | Intergenic | Intergenic | 12102    | NM_01352 | 14293  | Fpr1       | FPR LXA4R   |
| chr9  | 1.07E+08 | 1.07E+08 | Intergenic | L1MC LINE  | 22967    | NM_17548 | 235599 | 6430571L1- |             |
| chr12 | 1.21E+08 | 1.21E+08 | Intergenic | Intergenic | -26509   | NM_00129 | 217951 | Tmem196    | Gm528       |
| chr11 | 5441927  | 5442100  | exon (NM_  | exon (NM_  | 207      | NM_13403 | 104479 | Ccdc117    | 1110004KC   |
| chr8  | 72240452 | 72240575 | promoter-1 | promoter-1 | -128     | NM_18127 | 66869  | Zfp869     | 120000310:  |
| chr2  | 32243377 | 32243525 | promoter-1 | promoter-1 | -192     | NM_00849 | 16819  | Lcn2       | 24p3 AW2    |
| chr13 | 99695777 | 99695850 | intron (NM | CpG        | 526      | NM_17871 | 238799 | Tnp01      | AU021749    |
| chr19 | 32334452 | 32334600 | 5' UTR (NM | 5' UTR (NM | -49023   | NM_00116 | 208449 | Sgms1      | 9530058O1   |
| chr17 | 46993552 | 46993650 | Intergenic | CpG        | -25239   | NM_00110 | 210982 | Gltscr1l   | mKIAA024C   |
| chr4  | 1.5E+08  | 1.5E+08  | intron (NM | CpG        | 82470    | NM_17377 | 242773 | Slc45a1    | C230078B2   |
| chr18 | 35658127 | 35658250 | intron (NM | intron (NM | 391      | NM_03074 | 81500  | Sil1       | 1810057E0   |
| chr12 | 1.1E+08  | 1.1E+08  | intron (NM | intron (NM | 77551    | NM_00116 | 380785 | Begain     | BM948371    |
| chr11 | 54680252 | 54680350 | intron (NM | CpG        | 361      | NM_00824 | 15254  | Hint1      | AA673479    |
| chr4  | 1.07E+08 | 1.07E+08 | promoter-1 | promoter-1 | 503      | NM_02956 | 56374  | Tmem59     | 1110001M    |
| chr16 | 48788802 | 48788875 | Intergenic | Intergenic | -16769   | NM_19829 | 77647  | Trat1      | C030046M    |
| chr14 | 84853877 | 84854200 | intron (NM | intron (NM | 10668    | NM_00101 | 219228 | Pcdh17     | C030033F1   |
| chr10 | 18734752 | 18734925 | intron (NM | intron (NM | 378      | NM_00939 | 21929  | Tnfaip3    | A20 Tnfip3  |
| chr16 | 55974102 | 55974325 | non-coding | non-coding | 296      | NM_17302 | 271377 | Zbtb11     | 9230110GC   |
| chr11 | 98448627 | 98448900 | promoter-1 | promoter-1 | -204     | NM_02566 | 66612  | Ormdl3     | 2810011N1   |
| chr8  | 27350027 | 27350275 | Intergenic | Intergenic | 81510    | NM_19904 | 73754  | Thap1      | 4833431AC   |
| chr4  | 15941202 | 15941325 | promoter-1 | promoter-1 | -239     | NM_14595 | 209212 | Osgin2     | BC010311    |
| chr4  | 1.06E+08 | 1.06E+08 | Intergenic | Intergenic | -4877    | NM_02559 | 329910 | Acot11     | 1110020M    |
| chr8  | 6191402  | 6191600  | Intergenic | RMER19A    | -1086269 | NM_01138 | 20494  | Slc10a2    | ASBT ISBT   |
| chr1  | 1.33E+08 | 1.33E+08 | 3' UTR (NM | 3' UTR (NM | -6836    | NM_01977 | 56489  | lkbke      | AW558201    |
| chr10 | 1.27E+08 | 1.27E+08 | exon (NM_  | exon (NM_  | 204      | NM_00100 | 216443 | Mars       | Metrs Mtr   |
| chr11 | 95007277 | 95007625 | promoter-1 | promoter-1 | -336     | NM_00786 | 13394  | Dlx4       | Dlx-4 Dlx7  |

|       |          |          |            |            |        |           |        |            |            |
|-------|----------|----------|------------|------------|--------|-----------|--------|------------|------------|
| chr15 | 78871527 | 78871600 | promoter-1 | promoter-1 | -752   | NM_01573  | 14429  | Galr3      | Galnr3     |
| chr7  | 1.07E+08 | 1.07E+08 | promoter-1 | promoter-1 | 293    | NM_01205  | 27050  | Rps3       | D7ErtD795  |
| chr11 | 22273277 | 22273425 | Intergenic | Intergenic | -86553 | NM_00125  | 216565 | Ehbp1      | AF424697   |
| chr3  | 90280102 | 90280725 | intron (NM | CpG        | 290    | NM_02637  | 67781  | Ilf2       | 6230405A1  |
| chrX  | 1.01E+08 | 1.01E+08 | Intergenic | RSINE1 SIN | -42932 | NM_00107  | 245555 | C77370     | A230051P1  |
| chr16 | 17210202 | 17210300 | exon (NM_  | exon (NM_  | 2023   | NM_00103  | 239731 | Rimbp3     | Gm1759 G   |
| chr3  | 1.33E+08 | 1.33E+08 | intron (NM | RMER15 L'  | 11971  | NM_02792  | 71793  | Ints12     | 1110020M   |
| chr6  | 1.31E+08 | 1.31E+08 | promoter-1 | promoter-1 | -83    | NM_00846  | 16633  | Klra2      | Klra30 Ly4 |
| chr3  | 1.21E+08 | 1.21E+08 | intron (NM | intron (NM | 11845  | NM_00103  | 619318 | 4930432M   | -          |
| chr17 | 29636352 | 29636450 | Intergenic | Intergenic | 8411   | NM_00884  | 18712  | Pim1       | Pim-1      |
| chr17 | 35096452 | 35096625 | promoter-1 | promoter-1 | -355   | NM_01047  | 15511  | Hspa1b     | Hsp70 Hsp  |
| chr5  | 81487202 | 81487425 | intron (NM | intron (NM | 36695  | NM_19870  | 319387 | Lphn3      | 5430402I2: |
| chr4  | 1.38E+08 | 1.38E+08 | intron (NM | intron (NM | 1362   | NM_00109  | 230863 | Sh2d5      | BC036961   |
| chr4  | 98674877 | 98675200 | intron (NM | intron (NM | -22608 | NM_01391  | 30924  | Angptl3    | hypl       |
| chr13 | 43589152 | 43589325 | Intergenic | Intergenic | -12896 | NM_01993  | 56705  | Ranbp9     | IBAP-1 Iba |
| chr1  | 88400127 | 88400375 | Intergenic | Intergenic | -23060 | NM_00897  | 19231  | Ptma       | Thym       |
| chr1  | 1.72E+08 | 1.72E+08 | intron (NM | RSINE1 SIN | 11665  | NM_02752  | 70729  | Nos1ap     | 6330408P1  |
| chr15 | 96485477 | 96485550 | Intergenic | ORR1E LTF  | -12169 | NM_00116  | 105727 | Slc38a1    | AA408026   |
| chr8  | 28088602 | 28088775 | intron (NM | CpG        | 880    | NM_00111  | 353310 | Zfp703     | 1110032O:  |
| chr16 | 4790152  | 4790225  | promoter-1 | promoter-1 | -253   | NM_02567  | 66626  | Cdip1      | 2700048O:  |
| chr13 | 23960477 | 23960950 | promoter-1 | promoter-1 | -174   | NR_12161: | 20504  | Slc17a1    | NAPI-1 Na  |
| chr1  | 90172627 | 90172875 | intron (NM | intron (NM | 1381   | NM_17250  | 212427 | A730008H:  | mFleg1     |
| chr1  | 95021652 | 95021950 | Intergenic | Intergenic | -10016 | NM_01670  | 11611  | Agxt       | AGT Agt1   |
| chr3  | 69526077 | 69526425 | intron (NM | CpG        | 274    | NM_13378  | 97112  | Nmd3       | C87860     |
| chr19 | 37517302 | 37517600 | Intergenic | Intergenic | 8120   | NM_00824  | 15242  | Hhex       | Hex Hex1   |
| chr11 | 1.09E+08 | 1.09E+08 | promoter-1 | promoter-1 | -816   | NM_00102  | 104681 | Slc16a6    | AW743111   |
| chr14 | 66598777 | 66598850 | intron (NM | intron (NM | 11493  | NM_01349  | 12759  | Clu        | AI893575 , |
| chr17 | 21653852 | 21653950 | Intergenic | Intergenic | -18602 | NM_14451  | 22710  | Zfp52      | KRAB11 Zf  |
| chr1  | 1.01E+08 | 1.01E+08 | Intergenic | Intergenic | 292800 | NM_02758  | 70866  | Slco6d1    | 492151110! |
| chr11 | 23155127 | 23155475 | promoter-1 | promoter-1 | -740   | NM_00103  | 103573 | Xpo1       | AA420417   |
| chr10 | 79502727 | 79502800 | promoter-1 | promoter-1 | -359   | NM_02555  | 66420  | Polr2e     | 2410021N1  |
| chr19 | 5567402  | 5567475  | promoter-1 | promoter-1 | -636   | NM_00103  | 381201 | Ap5b1      | Gm962      |
| chr15 | 96587852 | 96587950 | Intergenic | PB1D10 SI  | -57772 | NM_17512  | 67760  | Slc38a2    | 5033402L1  |
| chr1  | 1.34E+08 | 1.34E+08 | promoter-1 | promoter-1 | -243   | NM_17251  | 213464 | Rbbp5      | 4933411J2. |
| chr16 | 31664227 | 31664350 | non-coding | non-coding | 267    | NM_00125  | 13383  | Dlg1       | B130052PC  |
| chr5  | 1.45E+08 | 1.45E+08 | promoter-1 | promoter-1 | 156    | NM_00888  | 18861  | Pms2       | AW555130   |
| chr14 | 37141527 | 37141825 | Intergenic | Intergenic | 233525 | NM_17500  | 218921 | 4930474N(- |            |
| chr7  | 87260152 | 87260575 | promoter-1 | promoter-1 | -127   | NM_17301  | 269951 | Idh2       | E430004F2  |
| chr13 | 76193252 | 76193775 | exon (NM_  | exon (NM_  | 931    | NM_17549  | 238725 | Gpr150     | C030001A1  |
| chr11 | 1.19E+08 | 1.19E+08 | intron (NM | CpG        | 216    | NM_00806  | 14387  | Gaa        | E430018M!  |
| chr9  | 1.1E+08  | 1.1E+08  | promoter-1 | promoter-1 | -199   | NM_00869  | 18054  | Ngp        | bectenecin |
| chr15 | 77685477 | 77685600 | Intergenic | ID_B1 SINI | -12933 | NM_02241  | 17886  | Myh9       | Fltn Myhn. |
| chr5  | 1.39E+08 | 1.39E+08 | promoter-1 | promoter-1 | -204   | NM_17787  | 330216 | Mblac1     | -          |
| chr8  | 42502252 | 42502400 | 5' UTR (NV | 5' UTR (NV | 146    | NM_01352  | 14300  | Frg1       | -          |
| chr16 | 36874652 | 36874800 | 5' UTR (NV | 5' UTR (NV | 186    | NM_13411  | 106389 | Eaf2       | AW048865   |
| chr2  | 11489527 | 11489950 | Intergenic | L1M2 LINE  | -14182 | NM_00117  | 170768 | Pfkfb3     | E330010H2  |
| chr6  | 1.29E+08 | 1.29E+08 | intron (NM | intron (NM | 1243   | NM_05310  | 93694  | Clec2d     | Clr-b Clrb |

|       |          |          |                    |            |         |           |        |             |            |
|-------|----------|----------|--------------------|------------|---------|-----------|--------|-------------|------------|
| chr6  | 17335502 | 17335950 | Intergenic         | Intergenic | 78086   | NM_00124  | 12389  | Cav1        | Cav Cav-1  |
| chr13 | 1.02E+08 | 1.02E+08 | promoter-1         | promoter-1 | -104    | NM_00987  | 12572  | Cdk7        | AI323415   |
| chr1  | 26743927 | 26744050 | intron (NMRMER4B L |            | 317     | NM_00103  | 210940 | 4931408C2-  |            |
| chr17 | 73267777 | 73267925 | 5' UTR (NM         | 5' UTR (NM | 206     | NM_02999  | 77889  | Lbh         | 1810009F1  |
| chr17 | 26078652 | 26078725 | TTS (NM_0          | TTS (NM_0  | 246     | NM_00129  | 14755  | Pigq        | Gpi1 Gpi1f |
| chr17 | 34341702 | 34341925 | intron (NM         | CpG        | 389     | NM_01153  | 21355  | Tap2        | ABC18 AI4  |
| chr9  | 63450027 | 63450325 | promoter-1         | promoter-1 | 79      | NM_03006  | 78250  | lqch        | 4921504KC  |
| chr8  | 72426402 | 72426525 | promoter-1         | promoter-1 | -6      | NM_02331  | 67184  | Ndufa13     | 2700054G1  |
| chr15 | 77074677 | 77074750 | intron (NM         | MIR SINE   | 62770   | NM_00111  | 93686  | Rbfox2      | Fbm2 Fxb   |
| chr6  | 1.29E+08 | 1.29E+08 | intron (NM         | intron (NM | 17567   | NM_17552  | 243653 | Clec1a      | 5930406N1  |
| chr6  | 1.23E+08 | 1.23E+08 | Intergenic         | Intergenic | -9099   | NM_00116  | 17474  | Clec4d      | Clecsf8 Mf |
| chr5  | 1.23E+08 | 1.23E+08 | TTS (NM_0          | TTS (NM_0  | 21718   | NR_10444: | 654470 | Tctn1       | G7300310:  |
| chr3  | 94142552 | 94142775 | Intergenic         | HAL1 LINE  | -3358   | NM_02541  | 66198  | Them5       | 1110007BC  |
| chr9  | 1.11E+08 | 1.11E+08 | intron (NM         | intron (NM | 28186   | NM_00116  | 71268  | Lrrfip2     | 5133400F2  |
| chr6  | 1.25E+08 | 1.25E+08 | Intergenic         | Intergenic | -30679  | NM_19860  | 213522 | Plekhg6     | BC026778   |
| chr5  | 1.19E+08 | 1.19E+08 | Intergenic         | Intergenic | -84002  | NM_17242  | 76199  | Med13l      | 221041311: |
| chr10 | 20561252 | 20561525 | Intergenic         | Lx9 LINE L | -110965 | NM_02620  | 52906  | Ahi1        | 1700015F0  |
| chr5  | 38611802 | 38611925 | promoter-1         | promoter-1 | 142     | NM_02528  | 17089  | Lyar        | MLZ-264    |
| chr19 | 20460902 | 20461175 | intron (NM         | intron (NM | 4123    | NM_01073  | 16952  | Anxa1       | Anx-1 Anx- |
| chr2  | 94277727 | 94277850 | intron (NM         | CpG        | 516     | NM_00746  | 11800  | Api5        | AAC-11 AI: |
| chr13 | 1.09E+08 | 1.09E+08 | promoter-1         | promoter-1 | 244     | NM_02804  | 71991  | Ercc8       | 2410022PC  |
| chr2  | 91366952 | 91367175 | Intergenic         | CpG        | -19416  | NM_00116  | 75786  | Ckap5       | 3110043H2  |
| chr11 | 70796202 | 70796450 | exon (NM_          | exon (NM_  | 202     | NM_00757  | 12261  | C1qbp       | AA407365   |
| chr9  | 44144127 | 44144300 | TTS (NM_0          | TTS (NM_0  | 1415    | NM_01043  | 15270  | H2afx       | AW228881   |
| chr4  | 1.35E+08 | 1.35E+08 | promoter-1         | promoter-1 | -535    | NM_00128  | 14105  | Srsf10      | FUSIP2 Fu: |
| chr5  | 63068727 | 63068825 | intron (NM         | intron (NM | 88640   | NM_17840  | 212285 | Arap2       | Centd1 Gn  |
| chr1  | 97319002 | 97319075 | Intergenic         | Intergenic | 108833  | NM_02632  | 67698  | Fam174a     | 2310044D2  |
| chr3  | 1.06E+08 | 1.06E+08 | intron (NM         | intron (NM | 156     | NM_00103  | 433638 | I830077J02- |            |
| chr10 | 9705427  | 9705650  | Intergenic         | Intergenic | -84700  | NM_00108  | 78808  | Stxbp5      | 0710001E2  |
| chr9  | 13632202 | 13632375 | promoter-1         | promoter-1 | 117     | NM_17683  | 72826  | Fam76b      | 2810485I0! |
| chr3  | 58273327 | 58273975 | Intergenic         | Intergenic | 54040   | NM_00108  | 72033  | Tsc22d2     | 1810043J1  |
| chr8  | 83267327 | 83267400 | Intergenic         | Lx7 LINE L | -4005   | NM_05312  | 93762  | Smarca5     | 4933427E2  |
| chr2  | 1.63E+08 | 1.63E+08 | Intergenic         | Intergenic | -3663   | NM_00108  | 241764 | L3mbtl1     | C630004GC  |
| chr3  | 21860252 | 21860325 | Intergenic         | Intergenic | -115286 | NM_03073  | 81004  | Tbl1xr1     | 8030499HC  |
| chr12 | 1.13E+08 | 1.13E+08 | Intergenic         | Intergenic | -5759   | NM_00939  | 21928  | Tnfaip2     | B94 Exoc3  |
| chr5  | 1.43E+08 | 1.43E+08 | intron (NM         | intron (NM | 1153    | NM_17272  | 231855 | Ap5z1       | C330006KC  |
| chr3  | 1.23E+08 | 1.24E+08 | Intergenic         | MLT2D LTI  | -106356 | NR_12161f | 83398  | Ndst3       | 4921531KC  |
| chr13 | 58486252 | 58486650 | exon (NM_          | exon (NM_  | 135     | NM_02733  | 70153  | 2210016F1-  |            |
| chr12 | 1.01E+08 | 1.01E+08 | Intergenic         | Intergenic | -11742  | NM_18318  | 71375  | Foxn3       | 5430426H2  |
| chr11 | 49527027 | 49527150 | promoter-1         | promoter-1 | -864    | NM_21248  | 104625 | Cnot6       | CCR4       |
| chr3  | 94690527 | 94690600 | exon (NM_          | exon (NM_  | 317     | NM_00894  | 19172  | Psmb4       | Pros-27    |
| chr5  | 1.37E+08 | 1.37E+08 | 5' UTR (NM         | 5' UTR (NM | 135     | NM_01882  | 23921  | Sh2b2       | Aps        |
| chr3  | 60332252 | 60332400 | intron (NM         | intron (NM | 27152   | NM_00125  | 56758  | Mbnl1       | Mbnl mKI/  |
| chr9  | 30837552 | 30838650 | promoter-1         | promoter-1 | -128    | NM_00111  | 235132 | Zbtb44      | 6030404E1  |
| chr6  | 1.21E+08 | 1.21E+08 | intron (NM         | intron (NM | 14825   | NM_00754  | 12122  | Bid         | 2700049M   |
| chr10 | 4829577  | 4829725  | intron (NM         | intron (NM | 33802   | NM_15339  | 64009  | Syne1       | 8B A33004  |
| chr5  | 1.35E+08 | 1.35E+08 | promoter-1         | promoter-1 | -146    | NM_00119  | 68758  | Abhd11      | 1110054D1  |

|       |          |          |            |            |         |          |        |            |            |
|-------|----------|----------|------------|------------|---------|----------|--------|------------|------------|
| chr5  | 8051702  | 8051775  | intron (NM | intron (NM | -4804   | NM_00108 | 109552 | Sri        | 22104170C  |
| chr10 | 1.28E+08 | 1.28E+08 | intron (NM | PB1D10 SI  | 3347    | NM_00125 | 103135 | Pan2       | 12000140C  |
| chr5  | 1.22E+08 | 1.22E+08 | intron (NM | intron (NM | 2272    | NM_17272 | 231713 | Naa25      | 4833422K1  |
| chr2  | 10002327 | 10002425 | promoter-1 | promoter-1 | 137     | NM_02528 | 16588  | Kin        | Kin17      |
| chr3  | 1.2E+08  | 1.2E+08  | Intergenic | Intergenic | -217432 | NM_01955 | 56195  | Ptbp2      | Ptb2 brPTI |
| chr4  | 1.19E+08 | 1.19E+08 | Intergenic | Intergenic | -36063  | NM_00819 | 14916  | Guca2b     | AV066530   |
| chr7  | 52917227 | 52917300 | intron (NM | intron (NM | 4501    | NM_01887 | 14344  | Fut2       | -          |
| chr6  | 1.18E+08 | 1.18E+08 | intron (NM | intron (NM | 559     | NM_19433 | 213895 | Bms1       | AA408648   |
| chr2  | 1.43E+08 | 1.43E+08 | intron (NM | CpG        | 199     | NM_00108 | 16558  | Kif16b     | 8430434E1  |
| chr17 | 31702377 | 31702575 | intron (NM | CpG        | 758     | NM_01667 | 18771  | Pknx1      | D17Wsu76   |
| chr14 | 56407302 | 56407400 | intron (NM | intron (NM | 343     | NM_00116 | 56532  | Ripk3      | 2610528K0  |
| chr4  | 45542652 | 45542725 | exon (NM_  | exon (NM_  | 1012    | NM_00103 | 230126 | Shb        | BC028832   |
| chr6  | 23996902 | 23997250 | Intergenic | Intergenic | -77016  | NM_20702 | 387347 | Tas2r118   | Gm465 T2   |
| chr12 | 1.12E+08 | 1.12E+08 | Intergenic | Intergenic | -10376  | NM_00113 | 26931  | Ppp2r5c    | 2610043M   |
| chr8  | 1.11E+08 | 1.11E+08 | intron (NM | intron (NM | 50357   | NM_00749 | 11906  | Zfhx3      | A230102L0  |
| chr6  | 29072852 | 29073275 | TTS (NM_1  | TTS (NM_1  | 41661   | NM_13392 | 68272  | Rbm28      | 2810480G1  |
| chr1  | 1.29E+08 | 1.29E+08 | intron (NM | intron (NM | 3375    | NM_14512 | 107895 | Mgat5      | 4930471A2  |
| chr3  | 96067302 | 96067600 | promoter-1 | promoter-1 | -211    | NM_03359 | 97122  | Hist2h4    | H4 X04652  |
| chr11 | 1.21E+08 | 1.21E+08 | intron (NM | CpG        | 223     | NM_02774 | 71276  | Ccdc57     | 4933434G0  |
| chr6  | 34731002 | 34731075 | 5' UTR (NV | 5' UTR (NV | 606     | NM_00128 | 76223  | Agbl3      | 2900053G1  |
| chr4  | 1.38E+08 | 1.38E+08 | intron (NM | MT2B LTR   | 1742    | NM_17270 | 230861 | Eif4g3     | 1500002J2  |
| chr9  | 1.1E+08  | 1.1E+08  | intron (NM | B3A SINE   | 79503   | NM_00125 | 72831  | Dhx30      | 2810477H0  |
| chr7  | 53179777 | 53179850 | Intergenic | CpG        | -3017   | NM_01012 | 13732  | Emp3       | H-4 H4 HM  |
| chr6  | 86682777 | 86682925 | intron (NM | CpG        | 521     | NM_01181 | 23885  | Gmcl1      | 2810049L1  |
| chr19 | 37385227 | 37385525 | intron (NM | B1F SINE , | 19727   | NM_03115 | 15925  | Ide        | 1300012G0  |
| chr1  | 1.27E+08 | 1.27E+08 | Intergenic | MER5A1 D   | 92441   | NM_02373 | 74117  | Actr3      | 1200003AC  |
| chr10 | 20905077 | 20905150 | Intergenic | Intergenic | -24323  | NM_01084 | 17863  | Myb        | AI550390 I |
| chr1  | 1.3E+08  | 1.3E+08  | Intergenic | Intergenic | 5300    | NM_00991 | 12767  | Cxcr4      | CD184 Cm   |
| chr2  | 54410652 | 54411025 | intron (NM | intron (NM | 122040  | NM_17303 | 271786 | Galnt13    | A230002A1  |
| chr17 | 29528452 | 29528575 | Intergenic | Intergenic | 30654   | NM_00115 | 26382  | Fgd2       | Tcd-2 Tcd2 |
| chr8  | 1.08E+08 | 1.08E+08 | Intergenic | ORR1D2 L   | -3118   | NM_17516 | 70796  | Zdhhc1     | 4432412D0  |
| chr4  | 62020902 | 62021050 | promoter-1 | promoter-1 | 606     | NM_00104 | 338355 | Fkbp15     | BB131447   |
| chr1  | 30930727 | 30930875 | Intergenic | CpG        | -10700  | NM_00108 | 213109 | Phf3       | 2310061N1  |
| chr6  | 53395752 | 53396000 | Intergenic | Intergenic | -127492 | NM_17272 | 231991 | Creb5      | Crebpa D4  |
| chr15 | 51524277 | 51524475 | Intergenic | Intergenic | 172631  | NM_08063 | 68135  | Eif3h      | 1110008A1  |
| chr1  | 1.87E+08 | 1.87E+08 | 5' UTR (NV | 5' UTR (NV | 346     | NM_00825 | 15284  | Hlx        | Hlx1       |
| chr1  | 1.52E+08 | 1.52E+08 | Intergenic | Lx8 LINE L | -32306  | NM_00111 | 96875  | Prg4       | CACP DOL!  |
| chr18 | 7869802  | 7869975  | intron (NM | CpG        | 693     | NM_15308 | 225131 | Wac        | 1110067PC  |
| chr17 | 45935602 | 45935850 | Intergenic | Intergenic | -64933  | NM_02816 | 72240  | 1600014C2- | -          |
| chr8  | 75015977 | 75016100 | intron (NM | CpG        | 475     | NM_17776 | 270066 | Slc35e1    | 6030458H0  |
| chr7  | 1.33E+08 | 1.33E+08 | Intergenic | L1M4b LIN  | -6655   | NM_02188 | 60504  | Il21r      | NILR       |
| chr1  | 1.3E+08  | 1.3E+08  | intron (NM | CpG        | 505     | NM_17744 | 226414 | Dars       | 5730439G1  |
| chr1  | 1.74E+08 | 1.74E+08 | Intergenic | RMER16-in  | -42475  | NM_01373 | 27218  | Slamf1     | 4933415F1  |
| chr3  | 89855777 | 89856100 | promoter-1 | promoter-1 | 380     | NM_00128 | 99650  | 4933434E2  | 5730552F2  |
| chr9  | 45792727 | 45792875 | 5' UTR (NV | 5' UTR (NV | 153     | NM_00877 | 18475  | Pafah1b2   | AI747451 , |
| chr3  | 75761252 | 75761325 | promoter-1 | promoter-1 | -417    | NM_00129 | 73124  | Golim4     | 3110027H2  |
| chr18 | 20904252 | 20904350 | 5' UTR (NV | 5' UTR (NV | 604     | NM_01973 | 56386  | B4galt6    | AA536803   |

|       |          |          |                       |        |          |        |            |            |
|-------|----------|----------|-----------------------|--------|----------|--------|------------|------------|
| chr4  | 1.32E+08 | 1.32E+08 | exon (NM_exon (NM_    | 383    | NM_14490 | 230784 | Sesn2      | HI95 SEST: |
| chr6  | 29997677 | 29997875 | promoter-1promoter-1  | -212   | NM_01093 | 18181  | Nrf1       | C87038 D6  |
| chr19 | 3809027  | 3809175  | TTS (NM_0 TTS (NM_0   | 41680  | NM_00116 | 225888 | Suv420h1   | AA117471   |
| chr10 | 85333927 | 85334075 | promoter-1promoter-1  | -575   | NM_13399 | 103136 | Pwp1       | 2310058A1  |
| chr3  | 83843377 | 83843750 | intron (NM CpG        | 520    | NM_17268 | 229473 | D930015E(C | Kiaa0922 r |
| chr16 | 64987477 | 64987825 | intron (NM intron (NM | 117959 | NM_00831 | 15557  | Htr1f      | Htr1eb     |
| chr12 | 13276127 | 13276200 | intron (NM intron (NM | 230    | NM_02770 | 71169  | Nbas       | 4933425L0  |
| chr1  | 1.68E+08 | 1.68E+08 | Intergenic Intergenic | -1335  | NM_03024 | 27878  | Tada1      | 2900026B1  |
| chr10 | 42619652 | 42619900 | intron (NM RLTR11A2   | 39458  | NM_17293 | 268297 | Scml4      | 9330161D1  |
| chr14 | 55321552 | 55321700 | Intergenic Intergenic | 9385   | NM_20713 | 110794 | Cebpe      | C/EBPe CR  |
| chr9  | 45651552 | 45651850 | intron (NM intron (NM | 5089   | NM_01179 | 23821  | Bace1      | C76936     |
| chr4  | 1.49E+08 | 1.49E+08 | intron (NM intron (NM | 1666   | NM_00116 | 18707  | Pik3cd     | 2410099E0  |
| chr19 | 5649552  | 5649675  | Intergenic L2 LINE L2 | 12123  | NM_00904 | 19697  | Rela       | p65        |
| chr9  | 44892627 | 44892900 | intron (NM intron (NM | 5497   | NM_00100 | 270152 | Amica1     | AMICA Cre  |
| chr16 | 35022852 | 35023075 | intron (NM CpG        | 456    | NM_02358 | 70757  | Ptplb      | 6330408J2i |
| chr17 | 57171627 | 57171850 | promoter-1promoter-1  | -808   | NM_01061 | 16549  | Khsrp      | 6330409F2  |
| chr12 | 17355052 | 17355250 | promoter-1promoter-1  | -148   | NM_00100 | 217431 | Nol10      | Gm67       |
| chr5  | 1.3E+08  | 1.3E+08  | Intergenic Intergenic | -12041 | NM_02712 | 69568  | Vkorc111   | 2310024KC  |
| chr11 | 1.01E+08 | 1.01E+08 | promoter-1promoter-1  | 24     | NM_02661 | 52469  | Coa3       | 1810033A1  |
| chr13 | 23677202 | 23677325 | TTS (NM_0 TTS (NM_0   | 576    | NM_00129 | 319179 | Hist1h2be  | -          |
| chr14 | 79881802 | 79881900 | promoter-1promoter-1  | -776   | NM_01876 | 22380  | Wbp4       | AW545037   |
| chr3  | 41368902 | 41369000 | intron (NM CpG        | 149    | NM_00113 | 269424 | Jade1      | AU041499   |
| chr14 | 21167052 | 21167275 | promoter-1promoter-1  | 180    | NM_02747 | 70601  | Ecd        | 5730461KC  |
| chr10 | 80986277 | 80986425 | intron (NM intron (NM | 619    | NM_01030 | 14676  | Gna15      | G[a]15 Gal |
| chr17 | 35368002 | 35368125 | intron (NM ID_B1 SINI | 4697   | NM_01090 | 18038  | Nfkbil1    | Def-7 IKBL |
| chr7  | 1.51E+08 | 1.51E+08 | intron (NM LTR31 LTR  | 4004   | NM_00785 | 13360  | Dhcr7      | AA409147   |
| chr12 | 54009377 | 54009525 | intron (NM intron (NM | 209081 | NM_19811 | 238161 | Akap6      | AI482140 , |
| chr10 | 79754577 | 79756275 | intron (NM CpG        | 250    | NM_00909 | 20054  | Rps15      | rig        |
| chr2  | 1.56E+08 | 1.56E+08 | promoter-1promoter-1  | -24    | NM_02666 | 68295  | Aar2       | 0610011L1  |
| chr8  | 67226177 | 67226425 | intron (NM intron (NM | -13926 | NM_02543 | 66234  | Msmo1      | 1500001G1  |
| chr11 | 44317527 | 44317950 | Intergenic Lx8 LINE L | -14728 | NM_02886 | 74315  | Rnf145     | 373241311: |
| chr11 | 31761502 | 31761850 | Intergenic MIRb SINE  | -9264  | NM_00129 | 67579  | Cpeb4      | Cpe-bp4 C  |
| chr8  | 36028277 | 36028575 | exon (NM_exon (NM_    | 318    | NM_17509 | 21951  | Tnks       | 4930554K1  |
| chr4  | 1.35E+08 | 1.35E+08 | intron (NM CpG        | 32053  | NM_01973 | 12399  | Runx3      | AML2 Cbfa  |
| chr5  | 1.51E+08 | 1.51E+08 | Intergenic Intergenic | -3229  | NM_17288 | 320365 | Fry        | 13CDNA73   |
| chr6  | 1.19E+08 | 1.19E+08 | exon (NM_exon (NM_    | 273    | NM_00108 | 232339 | Ankrd26    | 5730521P1  |
| chr15 | 90879552 | 90879725 | intron (NM CpG        | 744    | NM_00110 | 16564  | Kif21a     | -          |
| chr6  | 1.27E+08 | 1.27E+08 | Intergenic Intergenic | -52705 | NM_00103 | 381812 | Cracr2a    | Efcab4b Gi |
| chr5  | 1.44E+08 | 1.44E+08 | intron (NM ID_B1 SINI | 10740  | NM_14491 | 231871 | Daglb      | E33003611! |
| chr3  | 1.33E+08 | 1.33E+08 | promoter-1promoter-1  | -884   | NM_00104 | 214133 | Tet2       | Ayu17-449  |
| chr4  | 48137727 | 48137900 | promoter-1promoter-1  | 22     | NM_02634 | 67727  | Stx17      | 4833418L0  |
| chr8  | 1.09E+08 | 1.09E+08 | intron (NM intron (NM | -20865 | NM_01090 | 18021  | Nfatc3     | C80703 D8  |
| chr2  | 1.63E+08 | 1.63E+08 | intron (NM CpG        | 368    | NM_02569 | 66680  | Oser1      | 3230401D1  |
| chr2  | 1.64E+08 | 1.64E+08 | Intergenic Intergenic | -3638  | NM_00127 | 11486  | Ada        | -          |
| chr6  | 47404077 | 47404150 | promoter-1promoter-1  | -210   | NM_01204 | 26965  | Cul1       | -          |
| chr9  | 62971927 | 62972025 | Intergenic Intergenic | 22811  | NM_17244 | 207667 | Skor1      | AV273001   |
| chr4  | 1.19E+08 | 1.19E+08 | intron (NM intron (NM | 3663   | NM_01140 | 20525  | Slc2a1     | Glut-1 Glu |

|       |          |          |                       |         |          |        |           |            |
|-------|----------|----------|-----------------------|---------|----------|--------|-----------|------------|
| chrY  | 2787227  | 2787375  | Intergenic AT_rich Lo | 400043  | NM_00127 | 1E+08  | Gm3376    | Rbmy1b     |
| chr17 | 5287302  | 5287375  | intron (NM intron (NM | 131429  | NM_17534 | 106557 | Ldhal6b   | 493340201  |
| chr19 | 21470902 | 21471175 | intron (NM intron (NM | 76113   | NM_01026 | 14544  | Gda       | AU015411   |
| chr9  | 1.09E+08 | 1.09E+08 | intron (NM MLT1-int L | -15155  | NM_02585 | 66940  | Shisa5    | 2310008D1  |
| chr8  | 24622302 | 24622525 | Intergenic Intergenic | 100439  | NM_01383 | 20377  | Sfrp1     | 2210415KC  |
| chr6  | 1.42E+08 | 1.42E+08 | promoter-1promoter-1  | -16     | NM_18316 | 232491 | Pyroxd1   | -          |
| chr1  | 1.56E+08 | 1.56E+08 | promoter-1promoter-1  | -230    | NM_01188 | 24014  | Rnasel    | E230029104 |
| chr2  | 52279927 | 52280125 | intron (NM CpG        | 368     | NM_18299 | 75423  | Arl5a     | 2410015N2  |
| chr2  | 1.54E+08 | 1.54E+08 | Intergenic Intergenic | -4485   | NM_00789 | 13555  | E2f1      | E2F-1 mKl  |
| chr3  | 8667727  | 8667975  | promoter-1promoter-1  | -813    | NM_01042 | 15213  | Hey1      | AI316788   |
| chr17 | 33700702 | 33700950 | intron (NM intron (NM | 8174    | NM_05321 | 17916  | Myo1f     | C330006B1  |
| chr11 | 1.16E+08 | 1.16E+08 | exon (NM_exon (NM_    | 379     | NM_17880 | 338364 | Trim65    | 4732463G1  |
| chr2  | 1.04E+08 | 1.04E+08 | promoter-1promoter-1  | 159     | NM_00111 | 53872  | Caprin1   | AL022980   |
| chr16 | 18101802 | 18102125 | Intergenic RMER19A    | -12680  | NM_01117 | 19125  | Prodh     | Pro-1 Pro1 |
| chr7  | 19893577 | 19893800 | intron (NM intron (NM | 1706    | NM_00803 | 14282  | Fosb      | -          |
| chr14 | 69906777 | 69907075 | Intergenic Intergenic | -3766   | NM_02633 | 67712  | Slc25a37  | 1700020E2  |
| chr11 | 1.03E+08 | 1.03E+08 | Intergenic B3 SINE B. | -1726   | NM_13875 | 192231 | Hexim1    | 7330426E1  |
| chr1  | 1.22E+08 | 1.22E+08 | intron (NM intron (NM | 16731   | NM_01943 | 170706 | Tmem37    | AI173373   |
| chr1  | 30930052 | 30930625 | Intergenic CpG        | -10237  | NM_00108 | 213109 | Phf3      | 2310061N1  |
| chr13 | 47139727 | 47139850 | intron (NM intron (NM | 920     | NM_17226 | 218214 | Kdm1b     | 4632428NC  |
| chr6  | 52196027 | 52196250 | promoter-1promoter-1  | -329    | NM_01045 | 15396  | Hoxa11    | Hox-1.9 Hc |
| chr2  | 1.65E+08 | 1.65E+08 | intron (NM intron (NM | -4020   | NM_20770 | 140579 | Elmo2     | 1190002F2  |
| chr13 | 34967302 | 34967475 | promoter-1promoter-1  | 25      | NM_01383 | 19134  | Prpf4b    | 2610037HC  |
| chr8  | 90129702 | 90130000 | Intergenic Intergenic | 42045   | NM_17790 | 330820 | 4933402J0 | -          |
| chrX  | 1.17E+08 | 1.17E+08 | Intergenic LTRIS5 LTR | 132221  | NM_05311 | 93728  | Pabpc5    | C820015E1  |
| chr10 | 66902077 | 66902450 | Intergenic Intergenic | -98354  | NM_01011 | 13654  | Egr2      | Egr-2 Krox |
| chr5  | 1.21E+08 | 1.21E+08 | intron (NM (TGAA)n Si | 9652    | NM_00805 | 14357  | Dtx1      | Fxit1 mKIA |
| chr7  | 1.26E+08 | 1.26E+08 | Intergenic Intergenic | 21501   | NM_00103 | 319622 | Itpr1l2   | C130081G2  |
| chr12 | 1.19E+08 | 1.19E+08 | intron (NM intron (NM | 1715    | NM_01006 | 13411  | Dnah11    | Dnahc11 b  |
| chr5  | 1.48E+08 | 1.48E+08 | Intergenic Lx8 LINE L | -10090  | NM_00125 | 76366  | Mtif3     | 2810012L1  |
| chr16 | 20097802 | 20098000 | intron (NM CpG        | 274     | NM_02943 | 75785  | Klhl24    | 1110046J1  |
| chr1  | 1.63E+08 | 1.63E+08 | intron (NM intron (NM | 122     | NM_00103 | 226541 | Klhl20    | AI504637 I |
| chr12 | 74388727 | 74388800 | intron (NM intron (NM | 928     | NM_00103 | 625098 | Slc38a6   | AW322671   |
| chr3  | 88100127 | 88100200 | promoter-1promoter-1  | 597     | NM_02980 | 76927  | Tsacc     | 1700021C1  |
| chr10 | 82417977 | 82418100 | Intergenic SSU-rRNA_  | -30204  | NM_02143 | 58250  | Chst11    | 1110020PC  |
| chr13 | 1.06E+08 | 1.06E+08 | promoter-1promoter-1  | -5      | NM_02607 | 67285  | Cwc27     | 3110009E1  |
| chr6  | 64378402 | 64378500 | intron (NM intron (NM | -300689 | NM_00750 | 11921  | Atoh1     | Hath1 MA   |
| chr11 | 53163927 | 53164100 | promoter-1promoter-1  | -256    | NM_03356 | 93736  | Aff4      | AF5Q31 AI  |
| chr1  | 1.2E+08  | 1.2E+08  | exon (NM_exon (NM_    | 131     | NM_02647 | 67949  | Nifk      | AI852665 I |
| chr15 | 43309002 | 43309150 | promoter-1promoter-1  | 301     | NM_02573 | 66736  | Emc2      | 4921531G1  |
| chr9  | 71333152 | 71333975 | promoter-1promoter-1  | 227     | NM_17860 | 28015  | Polr2m    | AA407243   |
| chr9  | 44066952 | 44067375 | intron (NM intron (NM | -7616   | NM_13322 | 170761 | Pdzd3     | NaPi-Cap2  |
| chr4  | 1.52E+08 | 1.52E+08 | intron (NM intron (NM | 23791   | NM_00108 | 269610 | Chd5      | 4930532L2  |
| chr8  | 1.22E+08 | 1.22E+08 | intron (NM intron (NM | 189     | NM_02795 | 71839  | Osgin1    | 1700012B1  |
| chr6  | 1.46E+08 | 1.46E+08 | intron (NM CpG        | 507     | NM_01058 | 16439  | Itpr2     | AI649341 I |
| chr6  | 1.14E+08 | 1.14E+08 | intron (NM MIRc SINE  | -54043  | NM_00103 | 11941  | Atp2b2    | D6Abb2e C  |
| chr1  | 1.84E+08 | 1.84E+08 | promoter-1promoter-1  | -685    | NM_17337 | 209456 | Trp53bp2  | 53BP2 AI7  |

|       |          |          |             |             |         |           |        |          |            |
|-------|----------|----------|-------------|-------------|---------|-----------|--------|----------|------------|
| chr12 | 1.14E+08 | 1.14E+08 | Intergenic  | Intergenic  | 14525   | NM_00110  | 382639 | Zbtb42   | EG382639   |
| chr2  | 1.81E+08 | 1.81E+08 | promoter-1  | promoter-1  | 59      | NM_00100  | 269400 | Rtel1    | AI451565 , |
| chr2  | 1.31E+08 | 1.31E+08 | promoter-1  | promoter-1  | -8      | NM_00129  | 69596  | Ap5s1    | 0610038L1  |
| chrX  | 1.36E+08 | 1.36E+08 | intron (NM  | intron (NM  | -12691  | NM_00125  | 66889  | Rnf128   | 1300002C1  |
| chr13 | 63533177 | 63533250 | promoter-1  | promoter-1  | -160    | NM_00128  | 14088  | Fancc    | Facc       |
| chr3  | 10466002 | 10466250 | Intergenic  | Intergenic  | -25996  | NM_00112  | 74718  | Snx16    | 4930522N2  |
| chr11 | 1.16E+08 | 1.16E+08 | intron (NM  | intron (NM  | -9946   | NM_02527  | 14027  | Evpl     | -          |
| chr5  | 3502252  | 3502425  | intron (NM  | intron (NM  | -41495  | NM_00104  | 68152  | Fam133b  | 2900022KC  |
| chr1  | 64135427 | 64135650 | intron (NM  | intron (NM  | 32425   | NM_03356  | 93691  | Klf7     | 9830124PC  |
| chr2  | 1.12E+08 | 1.12E+08 | exon (NM_   | exon (NM_   | 405     | NM_14688  | 258889 | Olfr1301 | MOR248-5   |
| chr11 | 1.01E+08 | 1.01E+08 | 5' UTR (NM  | 5' UTR (NM  | 187     | NM_02789  | 71743  | Coasy    | 1300003GC  |
| chr15 | 76491077 | 76491150 | promoter-1  | promoter-1  | 42      | NM_01063  | 16581  | Kifc2    | -          |
| chr10 | 59853777 | 59853850 | intron (NR_ | intron (NR_ | -8661   | NM_00116  | 1E+08  | Gm17455  | -          |
| chr19 | 6364527  | 6364625  | intron (NR_ | CpG         | 886     | NR_122118 | 22668  | Sf1      | BBP MZFM   |
| chr3  | 1.22E+08 | 1.22E+08 | Intergenic  | Intergenic  | -49937  | NM_00812  | 14630  | Gclm     | AI649393 , |
| chr14 | 47614452 | 47614750 | intron (NM  | intron (NM  | -6414   | NM_00116  | 74480  | Samd4    | 1700024GC  |
| chr8  | 98377102 | 98377175 | intron (NM  | intron (NM  | 253     | NM_17275  | 234595 | Slc38a7  | D430050E1  |
| chr4  | 55972927 | 55973300 | Intergenic  | Intergenic  | -427766 | NM_01063  | 16600  | Klf4     | EZF Gklf Z |
| chr15 | 81524627 | 81524850 | exon (NM_   | exon (NM_   | 2979    | NM_00116  | 214685 | Chadl    | AY100452   |
| chr14 | 32594577 | 32594850 | intron (NM  | intron (NM  | 48888   | NM_00102  | 105522 | Ankrd28  | AI465466 , |
| chr1  | 94639027 | 94639175 | Intergenic  | Intergenic  | -89162  | NM_01669  | 14733  | Gpc1     | AI462976   |
| chr7  | 1.07E+08 | 1.07E+08 | exon (NM_   | exon (NM_   | 2787    | NM_02814  | 72184  | Klhl35   | 2810406K1  |
| chr7  | 1.17E+08 | 1.17E+08 | intron (NM  | intron (NM  | 104109  | NM_00930  | 20947  | Swap70   | 70kDa AV2  |
| chr6  | 71391077 | 71391400 | promoter-1  | promoter-1  | -607    | NM_02428  | 68477  | Rmnd5a   | 1110007AC  |
| chr8  | 1.27E+08 | 1.27E+08 | intron (NM  | CpG         | 333     | NM_13396  | 102162 | Taf5l    | 1110005NC  |
| chr1  | 95448127 | 95448300 | intron (NM  | intron (NM  | 39532   | NM_14551  | 227377 | Farp2    | AI465173   |
| chr1  | 1.3E+08  | 1.3E+08  | promoter-1  | promoter-1  | 218     | NM_18175  | 226412 | R3hdm1   | R3hdm      |
| chr7  | 51969302 | 51969425 | intron (NM  | ORR1C1 L1   | 5250    | NM_02931  | 75510  | Izumo2   | 1700023D1  |
| chr8  | 1.07E+08 | 1.07E+08 | promoter-1  | promoter-1  | 151     | NM_00130  | 12354  | Car7     | AV343731   |
| chr1  | 82836102 | 82836425 | 5' UTR (NM  | 5' UTR (NM  | 205     | NM_01047  | 15463  | Agfg1    | AU045498   |
| chr12 | 1.13E+08 | 1.13E+08 | promoter-1  | promoter-1  | 191     | NM_02740  | 70369  | Bag5     | 1600025GC  |
| chr19 | 37776902 | 37777325 | Intergenic  | Intergenic  | 4815    | NM_00781  | 13082  | Cyp26a1  | Cyp26 P45  |
| chr5  | 1.37E+08 | 1.37E+08 | promoter-1  | promoter-1  | -341    | NM_00129  | 13047  | Cux1     | CDP Cutl1  |
| chr18 | 3042277  | 3042350  | Intergenic  | RMER16-in   | 81099   | NM_00116  | 1E+08  | Vmn1r238 | -          |
| chr14 | 79690427 | 79690550 | intron (NM  | intron (NM  | 10954   | NM_02542  | 66214  | Rgcc     | 1190002H2  |
| chr15 | 1.03E+08 | 1.03E+08 | TTS (NR_03  | TTS (NR_03  | 165     | NM_02646  | 67942  | Atp5g2   | 1810041M   |
| chr5  | 96650902 | 96651100 | intron (NM  | MLT1H LTI   | 11867   | NM_05315  | 94061  | Mrpl1    | 2410002L0  |
| chr1  | 64564902 | 64565525 | Intergenic  | MLT1 LTR    | -14165  | NM_13382  | 12912  | Creb1    | 2310001E1  |
| chr6  | 1.13E+08 | 1.13E+08 | promoter-1  | promoter-1  | -925    | NM_13393  | 171508 | Creld1   | AI843811   |
| chr7  | 1.07E+08 | 1.07E+08 | intron (NM  | CpG         | 209     | NM_13369  | 67967  | Pold3    | 2410142G1  |
| chr6  | 1.21E+08 | 1.21E+08 | Intergenic  | Intergenic  | -10187  | NM_01737  | 53857  | Tuba8    | -          |
| chr4  | 1.34E+08 | 1.34E+08 | intron (NR_ | CpG         | 140     | NM_02625  | 67586  | Ubxn11   | 4930506L0  |
| chr2  | 1.55E+08 | 1.55E+08 | promoter-1  | promoter-1  | -466    | NM_01981  | 60525  | Acss2    | 1110017C1  |
| chr19 | 53269352 | 53269525 | intron (NM  | intron (NM  | 50951   | NM_01375  | 27360  | Add3     | AI463285   |
| chr19 | 5295027  | 5295200  | intron (NM  | intron (NM  | 342     | NM_03010  | 319322 | Sf3b2    | 145kDa 26  |
| chr14 | 61368727 | 61368925 | exon (NM_   | exon (NM_   | -18145  | NM_18317  | 239126 | C1qtnf9  | 9130217G2  |
| chr12 | 1.12E+08 | 1.12E+08 | intron (NM  | CpG         | 343     | NM_17520  | 74251  | Ankrd9   | 2500003O2  |

|       |          |          |            |            |         |          |        |          |            |
|-------|----------|----------|------------|------------|---------|----------|--------|----------|------------|
| chr5  | 1.24E+08 | 1.24E+08 | promoter-1 | promoter-1 | -260    | NM_00113 | 208908 | Ccdc62   | AI661708 I |
| chr15 | 91002627 | 91002900 | intron (NM | intron (NM | 19475   | NM_01199 | 26874  | Abcd2    | ABC39 ALI  |
| chr15 | 91463502 | 91463950 | Intergenic | Intergenic | -39929  | NM_02573 | 66725  | Lrrk2    | 492151302  |
| chr2  | 1.28E+08 | 1.28E+08 | promoter-1 | promoter-1 | -224    | NM_00129 | 53885  | Nphp1    | -          |
| chr3  | 1.09E+08 | 1.09E+08 | intron (NM | intron (NM | 30409   | NM_17268 | 229731 | Slc25a24 | 2610016M   |
| chr18 | 24811727 | 24812100 | promoter-1 | promoter-1 | -279    | NM_02677 | 68591  | Mocos    | 111001801  |
| chrX  | 1.04E+08 | 1.04E+08 | intron (NM | intron (NM | 1284    | NM_17544 | 213438 | A630033H | AI662791 I |
| chr10 | 34958902 | 34959050 | Intergenic | Intergenic | 755770  | NM_01023 | 14302  | Frk      | BSK BSK/IY |
| chr7  | 52112702 | 52112800 | promoter-1 | promoter-1 | -22     | NM_00129 | 59047  | Pnkp     | 1810009G   |
| chr6  | 1.29E+08 | 1.29E+08 | Intergenic | LTRIS4 LTR | 19770   | NM_15350 | 232409 | Clec2e   | Clra clr-a |
| chr11 | 1.03E+08 | 1.03E+08 | intron (NM | intron (NM | 830     | NM_18328 | 544817 | Arhgap27 | 231006910  |
| chr3  | 95303677 | 95303850 | intron (NM | intron (NM | 631     | NM_00780 | 13038  | Ctsk     | AI323530 I |
| chr18 | 74938552 | 74938675 | promoter-1 | promoter-1 | -253    | NM_17747 | 52538  | Acaa2    | 0610011L0  |
| chr11 | 1.04E+08 | 1.04E+08 | intron (NM | intron (NM | 85738   | NM_00128 | 17762  | Mapt     | AI413597 I |
| chr17 | 74926977 | 74927250 | promoter-1 | promoter-1 | -522    | NM_00756 | 12211  | Birc6    | A430032G   |
| chr3  | 79395327 | 79395475 | promoter-1 | promoter-1 | 90      | NM_02635 | 67738  | Ppid     | 4930564J0  |
| chr13 | 3729402  | 3729725  | Intergenic | Intergenic | 74001   | NM_02741 | 70405  | Calml3   | 231006802  |
| chr12 | 16129727 | 16129800 | Intergenic | Intergenic | -306172 | NM_14455 | 217410 | Trib2    | AW319517   |
| chr6  | 91567652 | 91567925 | Intergenic | Intergenic | -66273  | NM_00932 | 21366  | Slc6a6   | AA589629   |
| chr15 | 57721127 | 57721200 | intron (NM | intron (NM | 2810    | NM_02420 | 67819  | Derl1    | 1110021N   |
| chr7  | 26473052 | 26473150 | exon (NM_  | exon (NM_  | 1080    | NM_01157 | 21803  | Tgfb1    | TGF-beta1  |
| chr1  | 1.41E+08 | 1.41E+08 | Intergenic | Intergenic | -51298  | NM_00116 | 329260 | Dennd1b  | 4632404N1  |
| chr13 | 90028752 | 90029025 | intron (NM | intron (NM | -146771 | NM_00113 | 13003  | Vcan     | 5430420N   |
| chr1  | 1.84E+08 | 1.84E+08 | Intergenic | Intergenic | -16155  | NM_01205 | 27058  | Srp9     | 9kDa       |
| chr2  | 1.73E+08 | 1.73E+08 | TTS (NM_0  | TTS (NM_0  | -5078   | NM_00113 | 58203  | Zbp1     | 2010010H   |
| chr2  | 1.8E+08  | 1.8E+08  | promoter-1 | promoter-1 | 76      | NM_03137 | 72075  | Ogfr     | 2010013E1  |
| chr7  | 88138527 | 88138725 | promoter-1 | promoter-1 | 56      | NM_17870 | 233410 | Zfp592   | 8430405N2  |
| chr15 | 78744252 | 78744575 | promoter-1 | promoter-1 | 64      | NM_02027 | 57028  | Pdpx     | 1600027H   |
| chr5  | 23958527 | 23958600 | intron (NM | intron (NM | 568     | NM_00125 | 213990 | Agap3    | AGAP-3 AV  |
| chr2  | 1.56E+08 | 1.56E+08 | promoter-1 | promoter-1 | -393    | NM_00112 | 16328  | Cep250   | AW490617   |
| chr12 | 74788527 | 74788625 | intron (NM | intron (NM | 102548  | NM_00885 | 18755  | Prkch    | Pkch       |
| chr11 | 5409952  | 5410100  | Intergenic | Intergenic | -10618  | NM_01384 | 22433  | Xbp1     | D11Ert39   |
| chr7  | 1.17E+08 | 1.17E+08 | promoter-1 | promoter-1 | -61     | NM_02005 | 56786  | Tmem9b   | 2310004K   |
| chr1  | 59819727 | 59820150 | Intergenic | CpG        | -1185   | NM_00756 | 12168  | Bmpr2    | 2610024H2  |
| chr5  | 43434302 | 43434500 | Intergenic | MIR SINE   | -190301 | NM_17593 | 231207 | Cpeb2    | A630055H:  |
| chr14 | 70612402 | 70612500 | Intergenic | Intergenic | -4973   | NM_01136 | 20410  | Sorbs3   | SCAM-1 S   |
| chr7  | 1.08E+08 | 1.08E+08 | TTS (NM_0  | TTS (NM_0  | -5499   | NM_17707 | 320100 | Relt     | E430021K2  |
| chr9  | 1.07E+08 | 1.07E+08 | Intergenic | Intergenic | 11368   | NM_00989 | 12700  | Cish     | AI385595 I |
| chr1  | 36621102 | 36621250 | exon (NM_  | exon (NM_  | -5950   | NM_00112 | 20353  | Sema4c   | AI426163 : |
| chr1  | 75138027 | 75138350 | intron (NM | CpG        | 754     | NM_02697 | 69171  | Cnppd1   | 1810031K1  |
| chr2  | 73052077 | 73052300 | intron (NM | CpG        | 316     | NM_03009 | 67059  | Ola1     | 2510025G   |
| chr7  | 1.09E+08 | 1.09E+08 | promoter-1 | promoter-1 | -256    | NM_01956 | 56212  | Rhog     | 2810426G   |
| chr4  | 46466627 | 46466750 | intron (NM | intron (NM | 2699    | NM_13088 | 67628  | Anp32b   | 2410015B1  |
| chr15 | 38008302 | 38008375 | 5' UTR (NM | 5' UTR (NM | 271     | NM_00111 | 70790  | Ubr5     | Edd Edd1   |
| chr7  | 1.35E+08 | 1.35E+08 | Intergenic | Intergenic | 21159   | NM_00107 | 434246 | Trim72   | BC067209   |
| chr17 | 28656252 | 28656425 | Intergenic | Intergenic | -11468  | NM_02629 | 67645  | Armc12   | 493051111: |
| chr7  | 88491577 | 88491725 | TTS (NM_0  | TTS (NM_0  | -1531   | NM_00909 | 20068  | Rps17    | -          |



|       |          |          |                       |         |          |        |                     |
|-------|----------|----------|-----------------------|---------|----------|--------|---------------------|
| chr10 | 1.16E+08 | 1.16E+08 | intron (NM Lx8 LINE L | -7653   | NM_00116 | 619332 | 4933416CC-          |
| chr19 | 43785602 | 43786025 | intron (NM intron (NM | 21634   | NM_05310 | 93685  | Entpd7 1810012B1    |
| chr12 | 55797702 | 55797800 | promoter-1promoter-1  | -899    | NM_02545 | 66266  | Eapp 181001101      |
| chr7  | 54263277 | 54263900 | 5' UTR (NM 5' UTR (NM | 196     | NM_17531 | 101685 | Spty2d1 5830435K1   |
| chr4  | 1.34E+08 | 1.34E+08 | intron (NM intron (NM | 7631    | NM_14555 | 100017 | Ldlrap1 AA691260    |
| chr10 | 98695152 | 98695400 | Intergenic Intergenic | -30589  | NM_02626 | 67603  | Dusp6 130001910:    |
| chr6  | 7643102  | 7643200  | promoter-1promoter-1  | 31      | NM_01205 | 27053  | Asns -              |
| chr2  | 1.25E+08 | 1.25E+08 | promoter-1promoter-1  | -17     | NM_01085 | 17876  | Myef2 9430071BC     |
| chr14 | 77434477 | 77434575 | intron (NM intron (NM | 1898    | NM_17248 | 210808 | Lacc1 9030625AC     |
| chr13 | 75090077 | 75090250 | Intergenic Lx8 LINE L | -137272 | NM_01362 | 18548  | Pcsk1 Nec-1 Nec     |
| chr2  | 1.53E+08 | 1.53E+08 | Intergenic Lx8 LINE L | -7351   | NM_00844 | 16569  | Kif3b AI854312 ,    |
| chr2  | 26300352 | 26300575 | intron (NM CpG        | 273     | NM_15312 | 227648 | Sec16a AU024582     |
| chr13 | 24927177 | 24927375 | intron (NM intron (NM | 3748    | NM_01955 | 56196  | Tdp2 D13Ert65       |
| chr7  | 1.48E+08 | 1.48E+08 | TTS (NM_0 TTS (NM_0   | 2919    | NM_01874 | 54399  | Bet1l 2610021K2     |
| chr11 | 58717552 | 58717625 | intron (NM CpG        | 139     | NM_01175 | 22698  | Zfp39 CTfin33 Zfj   |
| chr12 | 1.12E+08 | 1.12E+08 | intron (NM Lx9 LINE L | 26545   | NM_01163 | 22031  | Traf3 AI528849 c    |
| chr14 | 76510377 | 76510550 | promoter-1promoter-1  | 159     | NM_02617 | 67467  | Gpalpp1 120001111:  |
| chr1  | 1.64E+08 | 1.64E+08 | Intergenic Intergenic | -5671   | NM_01679 | 53330  | Vamp4 D1Ert6147:    |
| chr10 | 83875177 | 83875375 | intron (NM MIRb SINE  | 27940   | NM_00100 | 77976  | Nuak1 AU014801      |
| chr7  | 4817952  | 4818225  | promoter-1promoter-1  | -307    | NM_02615 | 67441  | Isoc2b 0610042E0    |
| chr14 | 51875802 | 51876025 | promoter-1promoter-1  | -126    | NM_05311 | 93726  | Rnase2a Ear11       |
| chr13 | 9763077  | 9763150  | intron (NM CpG        | 1447    | NM_00119 | 66505  | Zmynd11 2210402G2   |
| chr10 | 1.28E+08 | 1.28E+08 | intron (NM CpG        | 4312    | NM_05407 | 116848 | Baz2a AA415431      |
| chr15 | 98783177 | 98783300 | intron (NM intron (NM | 694     | NM_01165 | 22142  | Tuba1a Tuba-1 Tul   |
| chr1  | 1.33E+08 | 1.33E+08 | promoter-1promoter-1  | -118    | NM_00855 | 17164  | Mapkapk2 AA960234   |
| chr13 | 94766252 | 94766625 | Intergenic Intergenic | -61313  | NM_17258 | 218454 | Lhfpl2 6030465B1    |
| chr17 | 31194852 | 31195000 | intron (NM CpG        | 287     | NM_00959 | 11307  | Abcg1 AW413978      |
| chr10 | 62040952 | 62041175 | exon (NM_ exon (NM_   | 142     | NM_02819 | 72320  | 2510003E0 0710007C1 |
| chrY  | 1769277  | 1769350  | Intergenic Intergenic | -85696  | NM_00111 | 1E+08  | Gm16501 ENSMUSG0    |
| chr6  | 3515052  | 3515225  | intron (NM intron (NM | 66745   | NM_00116 | 73288  | Ccdc132 1700034M    |
| chr13 | 49437302 | 49437500 | intron (NM intron (NM | 483     | NM_00103 | 76895  | Bicd2 -             |
| chr10 | 79861902 | 79862150 | 5' UTR (NM 5' UTR (NM | 198     | NM_01359 | 17192  | Mbd3 AI181826 ,     |
| chr16 | 84795102 | 84795250 | intron (NM MTB_Mm     | 20808   | NM_02384 | 67374  | Jam2 1110002N2      |
| chr13 | 41596127 | 41596425 | Intergenic Intergenic | -13547  | NM_00111 | 18003  | Nedd9 Cas-L CasL    |
| chr5  | 1.41E+08 | 1.41E+08 | exon (NM_ exon (NM_   | 117     | NM_13391 | 27979  | Eif3b AL033316      |
| chr7  | 31016977 | 31017325 | promoter-1promoter-1  | 58      | NM_02725 | 69920  | Polr2i 2810002B1    |
| chr11 | 59039677 | 59039800 | intron (NM (A)n Simpl | 1926    | NM_00113 | 11840  | Arf1 -              |
| chr5  | 1.37E+08 | 1.37E+08 | Intergenic Intergenic | -1012   | NM_17875 | 269717 | Orai2 A7300410:     |
| chr11 | 1.05E+08 | 1.05E+08 | exon (NM_ exon (NM_   | 149     | NM_17256 | 52686  | Mettl2 2810438F0    |
| chr9  | 57148702 | 57148900 | Intergenic Intergenic | -38395  | NM_02882 | 74211  | 1700017BC AA682102  |
| chr1  | 1.82E+08 | 1.82E+08 | promoter-1promoter-1  | -61     | NM_17865 | 109232 | Sccpdh AW214504     |
| chr2  | 1.05E+08 | 1.05E+08 | intron (NM CpG        | 133     | NM_14538 | 98221  | Eif3m Ga17 Pcid:    |
| chr9  | 44869752 | 44869850 | intron (NM intron (NM | 6537    | NM_00109 | 319742 | Mpzl3 5430427F1     |
| chr7  | 20093677 | 20093800 | promoter-1promoter-1  | -58     | NM_17769 | 232946 | Bloc1s3 BC043666    |
| chr5  | 1.09E+08 | 1.09E+08 | promoter-1promoter-1  | 533     | NM_15356 | 231580 | Gak D130045N:       |
| chr13 | 81850027 | 81850375 | promoter-1promoter-1  | -189    | NM_00108 | 67486  | Polr3g 2310047G2    |
| chr11 | 75040877 | 75041100 | intron (NM intron (NM | 33493   | NM_17770 | 237847 | Rtn4rl1 Ngr3 Ngrh   |

|       |          |          |            |            |         |           |          |           |             |
|-------|----------|----------|------------|------------|---------|-----------|----------|-----------|-------------|
| chr18 | 77713977 | 77714075 | intron (NM | intron (NM | 89849   | NM_00116  | 225743   | Rnf165    | 2900024M    |
| chr9  | 89599377 | 89599825 | exon (NM_  | exon (NM_  | 280     | NM_02536  | 66111    | Tmed3     | 1200002G1   |
| chr5  | 1.36E+08 | 1.36E+08 | promoter-1 | promoter-1 | -160    | NM_14541  | 100609   | Nsun5     | 9830109N1   |
| chr7  | 59384652 | 59384725 | Intergenic | RMER16-in  | -113602 | NM_00119  | 1.01E+08 | 1700015G1 | Ccdc179     |
| chr6  | 1.01E+08 | 1.01E+08 | intron (NM | intron (NM | 26275   | NM_18159  | 72171    | Shq1      | 2810403P1   |
| chr11 | 17759477 | 17759600 | Intergenic | Intergenic | 94340   | NM_02657  | 68145    | Etaa1     | 5730466H2   |
| chr9  | 1.06E+08 | 1.06E+08 | intron (NM | intron (NM | 7627    | NM_17292  | 245026   | Col6a6    | E330019B1   |
| chr8  | 1.19E+08 | 1.19E+08 | promoter-1 | promoter-1 | -622    | NM_02944  | 75796    | Cdyl2     | 1700029M    |
| chr6  | 1.08E+08 | 1.08E+08 | intron (NM | intron (NM | 811     | NM_01058  | 16438    | Itpr1     | D6Pas2 EN   |
| chr3  | 95558677 | 95559000 | promoter-1 | promoter-1 | 62      | NM_02793  | 71807    | Tars2     | 2610024N0   |
| chr1  | 1.46E+08 | 1.46E+08 | promoter-1 | promoter-1 | 155     | NM_01956  | 56207    | Uchl5     | 5830413B1   |
| chr3  | 1.35E+08 | 1.35E+08 | intron (NM | intron (NM | 88848   | NM_00868  | 18033    | Nfkb1     | NF-KB1 NF   |
| chr7  | 1.36E+08 | 1.36E+08 | intron (NM | intron (NM | 25910   | NM_02641  | 67865    | Rgs10     | 2310010N1   |
| chr12 | 1.05E+08 | 1.05E+08 | intron (NM | intron (NM | 752     | NM_19931  | 380780   | Serpina11 | Gm895       |
| chr7  | 1.34E+08 | 1.34E+08 | Intergenic | (TG)n Sim  | -1477   | NM_14563  | 246779   | Il27      | IL-27 IL-27 |
| chr15 | 8461977  | 8462125  | Intergenic | ORR1E LTF  | -67588  | NM_20123  | 71175    | Nipbl     | Idn3        |
| chr13 | 1.05E+08 | 1.05E+08 | Intergenic | CpG        | -9926   | NM_17259  | 218543   | Srek1     | 8430401BC   |
| chr11 | 97564652 | 97564900 | promoter-1 | promoter-1 | 28      | NM_01197  | 26446    | Psmb3     | AL033320    |
| chr11 | 1.11E+08 | 1.11E+08 | Intergenic | Intergenic | -270859 | NM_01060  | 16517    | Kcnj16    | 6430410F1   |
| chr1  | 93310727 | 93310850 | promoter-1 | promoter-1 | -989    | NM_01947  | 55927    | Hes6      | AI326893    |
| chr7  | 55987952 | 55988075 | Intergenic | L1_Mur2 L  | -56360  | NM_02803  | 243983   | Zdhhc13   | 2410004E0   |
| chr12 | 1.13E+08 | 1.13E+08 | 5' UTR (NM | 5' UTR (NM | 140     | NM_01162  | 21981    | Ppp1r13b  | AI449786 ,  |
| chr5  | 1.31E+08 | 1.31E+08 | promoter-1 | promoter-1 | 319     | NM_02324  | 66711    | Sbds      | 4733401P1   |
| chr13 | 29947302 | 29947575 | promoter-1 | promoter-1 | 19      | NM_14453  | 68916    | Cdkal1    | 1190005BC   |
| chr10 | 59715402 | 59715675 | Intergenic | Intergenic | -24838  | NM_00114  | 19156    | Psap      | AI037048 :  |
| chr5  | 1.07E+08 | 1.07E+08 | 5' UTR (NM | 5' UTR (NM | 246     | NM_00127  | 12545    | Cdc7      | AI597260 :  |
| chr4  | 1.41E+08 | 1.41E+08 | 3' UTR (NM | 3' UTR (NM | -12352  | NM_00103  | 76701    | Ctrc      | 1810044E1   |
| chr4  | 1.41E+08 | 1.41E+08 | promoter-1 | promoter-1 | -415    | NM_14598  | 213989   | Tmem82    | -           |
| chr5  | 1.01E+08 | 1.01E+08 | exon (NM_  | exon (NM_  | 174     | NM_02797  | 71883    | Coq2      | 2310002F1   |
| chr17 | 34973702 | 34973850 | promoter-1 | promoter-1 | 72      | NM_01944  | 54402    | Stk19     | G11 RP1     |
| chr12 | 56488502 | 56488650 | Intergenic | URR1A DN   | -11236  | NM_01196  | 26443    | Psma6     | IOTA        |
| chr4  | 1.11E+08 | 1.11E+08 | intron (NM | intron (NM | -412598 | NR_03379: | 67621    | Bend5     | 2310026E2   |
| chr8  | 75247427 | 75247575 | intron (NM | CpG        | 332     | NM_00918  | 20467    | Sin3b     | 2810430C1   |
| chr10 | 80260802 | 80260975 | promoter-1 | promoter-1 | 483     | NM_02390  | 78670    | Plekhj1   | 9530063M    |
| chr6  | 83059052 | 83059250 | promoter-1 | promoter-1 | 49      | NM_02674  | 68499    | Mrpl53    | 1110007K1   |
| chr6  | 1.46E+08 | 1.46E+08 | intron (NM | intron (NM | 236496  | NM_01065  | 16651    | Sspn      | Krag        |
| chr6  | 86475777 | 86475850 | exon (NM_  | exon (NM_  | 346     | NM_01186  | 23983    | Pcbp1     | WBP17 [a]   |
| chr11 | 1.18E+08 | 1.18E+08 | intron (NM | CpG        | 480     | NM_13375  | 74451    | Pgs1      | 2610019F1   |
| chr8  | 37382627 | 37382750 | Intergenic | RMER4B L   | -70118  | NM_00108  | 244421   | Lonrf1    | -           |
| chr8  | 47710677 | 47710825 | intron (NM | L1MC1 LIN  | 8106    | NM_00981  | 12367    | Casp3     | A830040C1   |
| chr5  | 1.05E+08 | 1.05E+08 | Intergenic | Intergenic | -27067  | NM_00120  | 20750    | Spp1      | 2AR Apl-1   |
| chr12 | 82961277 | 82961350 | 5' UTR (NM | 5' UTR (NM | 296     | NM_01881  | 54604    | Pcnx      | 2900024E2   |
| chr10 | 19661052 | 19661250 | intron (NM | intron (NM | 6819    | NM_00858  | 26408    | Map3k5    | 7420452D2   |
| chr3  | 1.08E+08 | 1.08E+08 | 5' UTR (NM | 5' UTR (NM | 386     | NM_00111  | 12977    | Csf1      | C87615 Cs   |
| chr7  | 73357752 | 73357925 | Intergenic | Intergenic | 103437  | NM_00108  | 269941   | Chsy1     | mKIAA0990   |
| chr19 | 7131827  | 7131925  | intron (NM | intron (NM | 618     | NM_13414  | 107227   | Macrod1   | AI604841 ,  |
| chr2  | 1.19E+08 | 1.19E+08 | Intergenic | L1MA9 LIN  | 34043   | NM_02811  | 72136    | Chst14    | 2600016L0   |

|       |          |          |             |             |         |          |        |         |            |
|-------|----------|----------|-------------|-------------|---------|----------|--------|---------|------------|
| chr14 | 67583002 | 67583450 | Intergenic  | Intergenic  | 44488   | NM_00976 | 12177  | Bnip3l  | C86132 D1  |
| chr6  | 1.34E+08 | 1.34E+08 | intron (NM  | intron (NM  | 18391   | NM_02577 | 66813  | Bcl2l14 | 4930452K2  |
| chr1  | 79249502 | 79249725 | Intergenic  | Intergenic  | 187052  | NM_00912 | 20254  | Scg2    | Chgc Sgll  |
| chr10 | 80568377 | 80568600 | promoter-1  | promoter-1  | -204    | NM_02313 | 26396  | Map2k2  | AA589381   |
| chr7  | 35925002 | 35925125 | Intergenic  | Intergenic  | 20751   | NM_00767 | 12606  | Cebpa   | C/ebpalpha |
| chr12 | 17516777 | 17517050 | Intergenic  | Intergenic  | -34766  | NM_01361 | 18263  | Odc1    | ODC        |
| chr1  | 79736302 | 79736525 | intron (NM  | intron (NM  | 21931   | NM_00111 | 69368  | Wdfy1   | 1700013BC  |
| chr2  | 1.02E+08 | 1.02E+08 | Intergenic  | Intergenic  | -17393  | NM_02963 | 76501  | Commdd9 | 1810029F0  |
| chr18 | 7631577  | 7632000  | Intergenic  | Intergenic  | -4927   | NM_00116 | 75739  | Mpp7    | 1110068J0  |
| chr12 | 1.06E+08 | 1.06E+08 | intron (NM  | CpG         | 286     | NM_14894 | 192119 | Dicer1  | 1110006F0  |
| chr19 | 6400302  | 6400375  | promoter-1  | promoter-1  | -245    | NM_01124 | 19395  | Rasgrp2 | CDC25L Ca  |
| chr3  | 51916077 | 51916150 | Intergenic  | B4A SINE    | -7185   | NM_00100 | 433586 | Maml3   | AV234550   |
| chr15 | 89204127 | 89204325 | promoter-1  | promoter-1  | 23      | NM_00111 | 1E+08  | Sco2    | -          |
| chr4  | 1.43E+08 | 1.43E+08 | Intergenic  | Intergenic  | -26464  | NM_00125 | 110593 | Prdm2   | 4833427P1  |
| chr5  | 77615102 | 77615400 | Intergenic  | ID2 SINE I  | 24979   | NM_00128 | 69982  | Spink2  | 1700007F2  |
| chr11 | 1.09E+08 | 1.09E+08 | Intergenic  | Intergenic  | -5685   | NM_14594 | 52639  | Wipi1   | 4930533HC  |
| chr7  | 1.03E+08 | 1.03E+08 | Intergenic  | Intergenic  | -39159  | NM_01185 | 23966  | Tenm4   | Doc4 ELM1  |
| chr5  | 1.25E+08 | 1.25E+08 | intron (NM  | CpG         | 338     | NM_01977 | 56334  | Tmed2   | 1110032D1  |
| chr1  | 1.4E+08  | 1.4E+08  | intron (NM  | intron (NM  | 38665   | NM_00111 | 19264  | Ptpcr   | B220 CD45  |
| chr15 | 36297027 | 36297300 | Intergenic  | ORR1E LTF   | -84261  | NM_01392 | 30945  | Rnf19a  | AA032313   |
| chr1  | 93262977 | 93263300 | exon (NM_   | exon (NM_   | 131     | NM_17339 | 227358 | Fam132b | 4832406C2  |
| chr7  | 1.36E+08 | 1.36E+08 | promoter-1  | promoter-1  | -499    | NM_00938 | 21843  | Tial1   | 5330433G1  |
| chr10 | 68674252 | 68674425 | intron (NM  | intron (NM  | -1067   | NM_00108 | 69288  | Rhobtb1 | 1700008H1  |
| chrX  | 1.4E+08  | 1.4E+08  | Intergenic  | Intergenic  | -33089  | NM_00111 | 13193  | Dcx     | Dbct       |
| chr6  | 58590777 | 58590875 | intron (NM  | intron (NM  | 44160   | NM_01192 | 26357  | Abcg2   | ABC15 ABC  |
| chr9  | 1.1E+08  | 1.1E+08  | intron (NM  | intron (NM  | 2376    | NM_00869 | 18054  | Ngp     | bectenecin |
| chr7  | 1.34E+08 | 1.34E+08 | non-coding  | non-coding  | 510     | NM_02371 | 73658  | Spns1   | 2210013KC  |
| chr11 | 86571427 | 86571550 | promoter-1  | promoter-1  | -494    | NM_00100 | 67300  | Cltc    | 3110065L2  |
| chr8  | 11016152 | 11016425 | intron (NR_ | intron (NR_ | -7858   | NM_00108 | 384783 | Irs2    | Irs-2      |
| chr11 | 1.01E+08 | 1.01E+08 | exon (NM_   | exon (NM_   | 130     | NM_01379 | 27419  | Naglu   | -          |
| chr9  | 1.03E+08 | 1.03E+08 | intron (NM  | CpG         | 154     | NM_01976 | 56332  | Amotl2  | AW549739   |
| chr14 | 32248552 | 32248800 | intron (NM  | CpG         | 543     | NM_01189 | 24056  | Sh3bp5  | AI606498 ! |
| chr7  | 1.25E+08 | 1.25E+08 | intron (NM  | intron (NM  | 1673    | NM_17066 | 267019 | Rps15a  | A630031B1  |
| chr5  | 1.18E+08 | 1.18E+08 | 5' UTR (NM  | 5' UTR (NM  | 113     | NM_00119 | 330177 | Taok3   | 2900006AC  |
| chr2  | 28257252 | 28257500 | Intergenic  | Intergenic  | -46085  | NM_00100 | 241289 | Ppp1r26 | Gm347 Kia  |
| chr14 | 51667602 | 51667725 | Intergenic  | MTE2a LTF   | 2175    | NM_00101 | 497113 | Rnase11 | Raj1       |
| chr5  | 77563902 | 77563975 | Intergenic  | Intergenic  | -19790  | NM_17560 | 74318  | Hopx    | 1110018K1  |
| chr4  | 1.26E+08 | 1.26E+08 | intron (NM  | intron (NM  | 9079    | NM_17270 | 230751 | Oscp1   | 1810007P1  |
| chr1  | 1.72E+08 | 1.72E+08 | intron (NM  | intron (NM  | 27794   | NM_00906 | 19737  | Rgs5    | 1110070AC  |
| chr12 | 1.04E+08 | 1.04E+08 | intron (NM  | intron (NM  | 712     | NM_00116 | 217835 | Rin3    | 6430500KC  |
| chr10 | 84959802 | 84960000 | intron (NM  | MIR SINE    | -101255 | NM_00101 | 74007  | Btbd11  | 6330404E1  |
| chr5  | 29761202 | 29761650 | exon (NM_   | exon (NM_   | 219     | NM_00103 | 433864 | Nom1    | D5Kng1 Gr  |
| chr13 | 63978552 | 63978675 | intron (NM  | intron (NM  | 61971   | NM_02350 | 76251  | Ercc6l2 | 0610007PC  |
| chr11 | 58064027 | 58064275 | Intergenic  | L1MA5A LI   | 35672   | NM_01944 | 54396  | Irgm2   | AI481100 ! |
| chr3  | 1.17E+08 | 1.17E+08 | Intergenic  | Intergenic  | -21154  | NM_00108 | 77559  | Ag1     | 1110061O!  |
| chr19 | 36807752 | 36807975 | 3' UTR (NM  | 3' UTR (NM  | 3231    | NM_01685 | 53412  | Ppp1r3c | PTG Ppp1r  |
| chr1  | 16560902 | 16561200 | non-coding  | non-coding  | 48368   | NM_02577 | 66799  | Ube2w   | 6130401J0  |

|       |          |          |             |             |         |           |        |          |            |
|-------|----------|----------|-------------|-------------|---------|-----------|--------|----------|------------|
| chr6  | 1.25E+08 | 1.25E+08 | intron (NM  | intron (NM  | 427     | NM_01370  | 22225  | Usp5     | AA407472   |
| chr7  | 88357502 | 88357650 | Intergenic  | MIRc SINE   | -1114   | NM_00880  | 18584  | Pde8a    | AI551852 I |
| chr1  | 79855352 | 79855525 | promoter-1  | promoter-1  | -198    | NM_00925  | 20720  | Serpine2 | B230326M   |
| chr9  | 75190202 | 75190625 | intron (NR_ | intron (NR_ | -5152   | NM_01347  | 12049  | Bcl2l10  | AA420380   |
| chr3  | 90165452 | 90165550 | Intergenic  | (A)n Simpl  | 19925   | NM_13930  | 229542 | Gatad2b  | AL118180   |
| chr9  | 1.11E+08 | 1.11E+08 | Intergenic  | CpG         | -16501  | NM_15309  | 235628 | Prss42   | Tessp2     |
| chrX  | 53851127 | 53851325 | promoter-1  | promoter-1  | -130    | NM_14623  | 236792 | Mmgt1    | 9630048L0  |
| chr4  | 35104302 | 35104400 | intron (NM  | CpG         | 382     | NM_17806  | 214944 | Mob3b    | 8430436F2  |
| chr13 | 1.05E+08 | 1.05E+08 | promoter-1  | promoter-1  | 8       | NM_02179  | 60411  | Cenpk    | B130045K2  |
| chr11 | 72838202 | 72838375 | intron (NM  | intron (NM  | 5778    | NM_01888  | 55984  | Camkk1   | AI846603 I |
| chr1  | 1.69E+08 | 1.69E+08 | intron (NM  | intron (NM  | 36420   | NM_03072  | 80914  | Uck2     | AA407809   |
| chr5  | 1.15E+08 | 1.15E+08 | exon (NM_   | exon (NM_   | 286     | NM_01167  | 22256  | Ung      | UNG1 UNC   |
| chr1  | 40087227 | 40087375 | Intergenic  | Intergenic  | -54312  | NM_01055  | 16178  | Il1r2    | CD121b II1 |
| chr5  | 92938027 | 92938175 | Intergenic  | Intergenic  | -3467   | NM_00764  | 12492  | Scarb2   | 9330185J1  |
| chr1  | 92951202 | 92951300 | intron (NM  | intron (NM  | 1230    | NM_00851  | 16978  | Lrrfip1  | AU024550   |
| chr18 | 36178227 | 36178525 | intron (NM  | intron (NM  | 53892   | NR_110349 | 74002  | Psd2     | 6330404E2  |
| chr4  | 1.55E+08 | 1.55E+08 | promoter-1  | promoter-1  | 661     | NM_08044  | 117592 | B3galt6  | BB129894   |
| chr10 | 12695877 | 12696125 | Intergenic  | Intergenic  | -11936  | NM_00116  | 74732  | Stx11    | 5830405CC  |
| chr7  | 75081852 | 75081975 | Intergenic  | Tigger9a D  | -15230  | NM_01051  | 16001  | Igf1r    | A330103N:  |
| chr5  | 1.01E+08 | 1.01E+08 | Intergenic  | Intergenic  | -2839   | NM_13919  | 231507 | Plac8    | C15 D5Ws   |
| chr10 | 38550152 | 38550275 | Intergenic  | RMER16-in   | -8628   | NM_00117  | 215919 | Rfpl4b   | 100040915  |
| chr7  | 1.38E+08 | 1.38E+08 | Intergenic  | Intergenic  | 57905   | NM_00841  | 16433  | Cuzd1    | Erg-1 ltma |
| chr1  | 1.95E+08 | 1.95E+08 | 5' UTR (NM  | 5' UTR (NM  | 189     | NM_15313  | 215243 | Traf3ip3 | 6030423DC  |
| chr15 | 80086077 | 80086825 | intron (NM  | CpG         | 837     | NM_00971  | 11911  | Atf4     | Atf-4 C/AT |
| chr7  | 86040877 | 86041050 | intron (NM  | CpG         | 150     | NM_00116  | 68048  | Aen      | 2700083BC  |
| chr7  | 1.5E+08  | 1.5E+08  | Intergenic  | Intergenic  | -14994  | NM_00128  | 55925  | Syt8     | -          |
| chr19 | 4200752  | 4201750  | intron (NM  | intron (NM  | 352     | NM_01123  | 19367  | Rad9a    | Rad9       |
| chr15 | 9607902  | 9607975  | intron (NM  | intron (NM  | 70623   | NM_17712  | 320277 | Spef2    | C230086AC  |
| chr1  | 1.8E+08  | 1.8E+08  | Intergenic  | Intergenic  | -36743  | NM_00116  | 269152 | Kif26b   | 4832420M   |
| chr11 | 99005002 | 99005350 | TTS (NM_0   | TTS (NM_0   | 11215   | NM_00771  | 12775  | Ccr7     | CD197 Cdv  |
| chr3  | 1.38E+08 | 1.38E+08 | promoter-1  | promoter-1  | 149     | NM_17538  | 108943 | Trmt10a  | 3110023L0  |
| chr7  | 1.18E+08 | 1.18E+08 | intron (NM  | CpG         | 631     | NM_00104  | 13690  | Eif4g2   | AA589388   |
| chr1  | 1.45E+08 | 1.45E+08 | Intergenic  | Intergenic  | -925851 | NM_02002  | 26878  | B3galt2  | -          |
| chr1  | 97559727 | 97559825 | intron (NM  | intron (NM  | 4395    | NM_00918  | 20452  | St8sia4  | PST PST-1  |
| chr2  | 1.49E+08 | 1.49E+08 | exon (NM_   | exon (NM_   | 3670    | NM_02898  | 74533  | Gzf1     | 8430437GC  |
| chr4  | 1.55E+08 | 1.55E+08 | 3' UTR (NM  | 3' UTR (NM  | 4394    | NM_14777  | 246228 | Vwa1     | 4932416A1  |
| chr1  | 1.74E+08 | 1.74E+08 | intron (NM  | intron (NM  | 1330    | NM_15355  | 98193  | Dcaf8    | AA408877   |
| chr15 | 66581677 | 66581900 | intron (NM  | intron (NM  | 79456   | NM_00937  | 21819  | Tg       | Tgn cog    |
| chr4  | 1.16E+08 | 1.16E+08 | promoter-1  | promoter-1  | -956    | NM_18158  | 18710  | Pik3r3   | AA414954   |
| chr5  | 1.14E+08 | 1.14E+08 | intron (NM  | intron (NM  | 747     | NM_00101  | 231630 | Ficd     | D5Ert40e   |
| chr1  | 37356927 | 37357025 | intron (NM  | CpG         | 293     | NM_00129  | 269180 | Inpp4a   | 107kDa 96  |
| chr17 | 35186802 | 35186975 | promoter-1  | promoter-1  | -300    | NM_03344  | 114584 | Clic1    | Clcp G6    |
| chr16 | 33751877 | 33752175 | intron (NM  | intron (NM  | -42097  | NM_01073  | 17063  | Muc13    | 114/A10 1  |
| chr1  | 1.62E+08 | 1.62E+08 | intron (NM  | CpG         | 110     | NM_02547  | 64659  | Mrps14   | 1810032L2  |
| chr8  | 93432927 | 93433100 | intron (NM  | CpG         | 80279   | NM_17722  | 109151 | Chd9     | 1810014J1: |
| chr1  | 40285902 | 40286150 | intron (NM  | intron (NM  | 4101    | NM_00836  | 16177  | Il1r1    | CD121a CI  |
| chr15 | 66932852 | 66932975 | Intergenic  | Intergenic  | 75531   | NM_00917  | 20442  | St3gal1  | 5330418N2  |

|       |          |          |                       |         |          |        |           |             |
|-------|----------|----------|-----------------------|---------|----------|--------|-----------|-------------|
| chr3  | 94386077 | 94386175 | intron (NM CpG        | 512     | NM_00108 | 76742  | Snx27     | 5730552M    |
| chr2  | 72313677 | 72313775 | promoter-1promoter-1  | -550    | NM_02586 | 66953  | Cdca7     | 2310021G0   |
| chr7  | 27038477 | 27038725 | Intergenic Intergenic | -13249  | NM_00116 | 1E+08  | Vmn1r184  | -           |
| chr4  | 91038827 | 91038950 | promoter-1promoter-1  | -142    | NM_20768 | 15569  | Elavl2    | Hub mel-N   |
| chr1  | 1.83E+08 | 1.83E+08 | Intergenic Intergenic | 36096   | NM_00821 | 15078  | H3f3a     | H3.3A       |
| chr14 | 21665052 | 21665300 | Intergenic Intergenic | 9292    | NM_00887 | 18792  | Plau      | u-PA uPA    |
| chr5  | 35445902 | 35446125 | intron (NM intron (NM | 2333    | NM_01358 | 16976  | Lrpap1    | AA617339    |
| chr2  | 45134927 | 45135250 | Intergenic Intergenic | -166289 | NM_01575 | 24136  | Zeb2      | 9130203F0   |
| chr12 | 1.13E+08 | 1.13E+08 | intron (NM CpG-3534   | 826     | NM_17336 | 217869 | Eif5      | 2810011H2   |
| chr9  | 26730327 | 26731175 | promoter-1promoter-1  | -85     | NM_00128 | 382064 | Gm1110    | -           |
| chrX  | 1.03E+08 | 1.03E+08 | intron (NM CpG        | 348     | NM_00953 | 22589  | Atrx      | 4833408C1   |
| chr6  | 1.37E+08 | 1.37E+08 | Intergenic Intergenic | -13299  | NM_02580 | 66857  | Plbd1     | 1100001H2   |
| chr1  | 1.55E+08 | 1.55E+08 | promoter-1promoter-1  | -101    | NM_00103 | 71836  | Shcbp1l   | 1700012A1   |
| chr1  | 66910377 | 66910875 | promoter-1promoter-1  | -743    | NM_00738 | 11363  | Acadl     | AA960361    |
| chr2  | 1.05E+08 | 1.05E+08 | intron (NM intron (NM | 1381    | NM_17719 | 320554 | Tcp11l1   | C130096D0   |
| chr2  | 1.44E+08 | 1.44E+08 | promoter-1promoter-1  | 270     | NM_02422 | 69178  | Snx5      | 0910001N0   |
| chr2  | 56967552 | 56967700 | promoter-1promoter-1  | -177    | NM_01361 | 18227  | Nr4a2     | HZF-3 NOT   |
| chr4  | 1.09E+08 | 1.09E+08 | promoter-1promoter-1  | -47     | NM_14615 | 230598 | Nrd1      | 260001100   |
| chr7  | 1.07E+08 | 1.07E+08 | Intergenic L1MA4 LIN  | 15214   | NM_14635 | 258353 | Olfr521   | MOR101-2    |
| chr19 | 21105652 | 21105800 | Intergenic Intergenic | -77034  | NM_02895 | 13409  | Tmc1      | 4933416G0   |
| chr14 | 58018302 | 58018425 | Intergenic Intergenic | -1043   | NM_03000 | 68631  | Cryl1     | 1110025H0   |
| chr3  | 1.58E+08 | 1.58E+08 | intron (NM intron (NM | 27251   | NM_14595 | 107869 | Cth       | 061001011   |
| chr1  | 1.9E+08  | 1.9E+08  | intron (NM intron (NM | -92818  | NM_01193 | 26381  | Esrrg     | ERR3 Errg   |
| chr1  | 92938252 | 92938800 | intron (NM intron (NM | -11495  | NM_00111 | 16978  | Lrrfip1   | AU024550    |
| chr16 | 38678977 | 38679075 | intron (NM RCHARR1    | 34122   | NM_02026 | 12549  | Arhgap31  | 5830477L0   |
| chr16 | 4726727  | 4726900  | intron (NM CpG        | 452     | NM_00113 | 15369  | Hmox2     | HO-2 HO2    |
| chr5  | 1.23E+08 | 1.23E+08 | intron (NM CpG        | 891     | NM_00100 | 30841  | Kdm2b     | Cxxc2 E430  |
| chr12 | 70683377 | 70683475 | intron (NM intron (NM | 589     | NM_00103 | 207965 | Vcpkmt    | Gm71 Met    |
| chr2  | 1.18E+08 | 1.18E+08 | Intergenic Intergenic | -97632  | NM_01158 | 21825  | Thbs1     | TSP-1 TSP1  |
| chr17 | 25270302 | 25270650 | exon (NM_ exon (NM_   | 137     | NM_01193 | 26373  | Clcn7     | AA409691    |
| chr9  | 44615727 | 44616500 | exon (NM_ exon (NM_   | -5079   | NM_13895 | 192653 | Ttc36     | -           |
| chr2  | 22666327 | 22666650 | intron (NM intron (NM | 36641   | NM_01945 | 54519  | Apbb1ip   | 9930118P0   |
| chr2  | 1.04E+08 | 1.04E+08 | intron (NM intron (NM | 770     | NM_21243 | 57443  | Fbxo3     | 1200002G0   |
| chr19 | 46379527 | 46379675 | promoter-1promoter-1  | 374     | NM_00117 | 18034  | Nfkb2     | NF-kappaB   |
| chr14 | 1.04E+08 | 1.04E+08 | Intergenic Intergenic | -75920  | NM_00113 | 13618  | Ednrb     | ET-B ET-BF  |
| chr12 | 1.01E+08 | 1.01E+08 | promoter-1promoter-1  | -113    | NM_00979 | 12313  | Calm1     | AI256814 ,  |
| chr8  | 1.26E+08 | 1.26E+08 | promoter-1promoter-1  | -557    | NM_15317 | 234847 | Spg7      | AI452278 ,  |
| chr8  | 95430552 | 95430700 | intron (NM intron (NM | 5332    | NM_02711 | 69543  | Capns2    | 2310005G0   |
| chr18 | 24688202 | 24688325 | intron (NM CpG        | 442     | NM_14486 | 225283 | Rprd1a    | C77387 ml   |
| chr10 | 79389777 | 79390400 | promoter-1promoter-1  | 2       | NM_00128 | 13496  | Arid3a    | Bright Dri1 |
| chr3  | 1.31E+08 | 1.31E+08 | Intergenic (TG)n Sim  | -7372   | NM_02894 | 74442  | Sgms2     | 4933405A1   |
| chr11 | 79038277 | 79038375 | Intergenic Intergenic | 18200   | NM_00104 | 78889  | Wsb1      | 1110056B1   |
| chr1  | 1.38E+08 | 1.38E+08 | Intergenic Intergenic | -32106  | NM_17343 | 215690 | Nav1      | 9530089B1   |
| chr12 | 71203427 | 71203600 | intron (NM intron (NM | 328     | NM_00108 | 18080  | Nin       | 3110068G2   |
| chr3  | 79090727 | 79090900 | Intergenic CpG        | -58485  | NM_00114 | 1E+08  | Gm17359   | -           |
| chr18 | 77952552 | 77952875 | promoter-1promoter-1  | 36      | NM_17867 | 212163 | 8030462N1 | Akd2 Ark2   |
| chr17 | 71202252 | 71202550 | intron (NM CpG        | 471     | NM_00116 | 21815  | Tgif1     | AA959811    |

|       |          |          |            |            |        |          |        |           |             |
|-------|----------|----------|------------|------------|--------|----------|--------|-----------|-------------|
| chr11 | 97887902 | 97888000 | promoter-1 | promoter-1 | -73    | NM_00115 | 19921  | Rpl19     | -           |
| chr1  | 9763177  | 9763350  | Intergenic | Intergenic | -24800 | NM_17344 | 70675  | Vcpip1    | 4932442AC   |
| chr9  | 65756852 | 65756975 | promoter-1 | promoter-1 | 96     | NM_17318 | 214897 | Csnk1g1   | 9130020E2   |
| chr1  | 95288277 | 95288450 | intron (NM | intron (NM | 17890  | NM_00127 | 404545 | Ano7      | Ngep Ngep   |
| chr10 | 42940802 | 42940900 | promoter-1 | promoter-1 | -441   | NM_02777 | 71365  | Pdss2     | 5430420PC   |
| chr3  | 95455602 | 95455825 | Intergenic | PB1 SINE   | -6930  | NM_00856 | 17210  | Mcl1      | AW556805    |
| chr11 | 77978452 | 77978525 | intron (NM | CpG        | 564    | NM_00942 | 22032  | Traf4     | A530032M    |
| chr10 | 87865777 | 87866025 | intron (NM | URR1A DN   | 23744  | NM_00100 | 432486 | Gnptab    | EG432486    |
| chr11 | 62352102 | 62352550 | intron (NM | CpG        | 437    | NM_02844 | 73139  | Cenpv     | 3110013HC   |
| chr3  | 82162277 | 82162375 | intron (NM | CpG        | 332    | NM_00108 | 213582 | Map9      | 5033421J1   |
| chr6  | 48036102 | 48036375 | intron (NM | CpG        | 354    | NM_00116 | 69228  | Zfp746    | 2810407L0   |
| chr2  | 57418477 | 57418800 | Intergenic | Intergenic | 327845 | NM_01027 | 14571  | Gpd2      | AA408484    |
| chr14 | 31362427 | 31362825 | intron (NM | CpG        | 309    | NM_00938 | 21881  | Tkt       | p68         |
| chr5  | 64731027 | 64731100 | intron (NM | intron (NM | 109467 | NM_00128 | 57915  | Tbc1d1    | 1110062GC   |
| chr15 | 51823027 | 51823100 | intron (NM | CpG        | 243    | NM_00900 | 19357  | Rad21     | SCC1 mKIA   |
| chr11 | 48669252 | 48669475 | Intergenic | Intergenic | 15485  | NM_00832 | 15944  | Irgm1     | lfggd3 lfi1 |
| chr6  | 1.42E+08 | 1.42E+08 | promoter-1 | promoter-1 | -913   | NM_00849 | 16832  | Ldhb      | AI790582    |
| chr2  | 1.29E+08 | 1.29E+08 | Intergenic | Intergenic | 40083  | NM_00129 | 19261  | Sirpa     | AI835480    |
| chr4  | 86220777 | 86220850 | promoter-1 | promoter-1 | -764   | NM_17837 | 68441  | Rraga     | 1300010C1   |
| chr10 | 61300752 | 61301025 | TTS (NM_0  | TTS (NM_0  | -54276 | NM_20700 | 404634 | H2afy2    | macroH2A:   |
| chr4  | 1.4E+08  | 1.4E+08  | Intergenic | Intergenic | -1825  | NM_17386 | 108911 | Rcc2      | 2610510HC   |
| chr8  | 64225952 | 64226125 | intron (NM | intron (NM | 12857  | NM_00129 | 72333  | Palld     | 2410003B1   |
| chr4  | 1.48E+08 | 1.48E+08 | intron (NM | CpG        | 327    | NM_01669 | 50912  | Exosc10   | PM-ScI PV   |
| chr1  | 39538927 | 39539150 | Intergenic | MLT1B LTF  | -3446  | NM_01877 | 54610  | Tbc1d8    | AD3 HBLP:   |
| chr18 | 75063627 | 75063750 | Intergenic | RLTR24 LT  | 57229  | NM_01072 | 16891  | Lipg      | 3110013KC   |
| chr17 | 43393727 | 43394000 | Intergenic | ORR1E LTF  | -13433 | NM_13377 | 77596  | Gpr110    | 5031409J1   |
| chr10 | 94848427 | 94848650 | Intergenic | Intergenic | 29379  | NM_00116 | 216233 | Socs2     | 8030460M    |
| chr9  | 44688677 | 44688975 | intron (NM | intron (NM | 531    | NM_00108 | 214162 | Kmt2a     | 6430520KC   |
| chr8  | 1.29E+08 | 1.29E+08 | Intergenic | Intergenic | -2102  | NM_00116 | 270110 | Irf2bp2   | E130305N2   |
| chr8  | 1.12E+08 | 1.12E+08 | promoter-1 | promoter-1 | -29    | NM_01737 | 15439  | Hp        | HP-1 preH   |
| chr10 | 79711727 | 79712175 | promoter-1 | promoter-1 | -246   | NM_02927 | 75406  | Ndufs7    | 1010001M    |
| chr2  | 35056952 | 35057025 | promoter-1 | promoter-1 | -348   | NM_02669 | 68365  | Rab14     | 0610030G2   |
| chr8  | 41947727 | 41947925 | 5' UTR (NV | 5' UTR (NV | 105    | NM_00104 | 11988  | Slc7a2    | 20.5 AI158  |
| chr2  | 1.65E+08 | 1.65E+08 | exon (NM_  | exon (NM_  | 113    | NM_00100 | 381406 | 2810408M  | -           |
| chr6  | 1.24E+08 | 1.24E+08 | intron (NM | intron (NM | 13864  | NM_15350 | 232370 | Clstn3    | CSTN3 Cs3   |
| chr17 | 15080727 | 15080850 | promoter-1 | promoter-1 | 599    | NM_02645 | 67912  | 1600012HC | -           |
| chr2  | 1.3E+08  | 1.3E+08  | promoter-1 | promoter-1 | 303    | NM_02419 | 67134  | Nop56     | 2310044F1   |
| chr2  | 1.05E+08 | 1.05E+08 | intron (NM | intron (NM | 10370  | NM_14480 | 211896 | Depdc7    | AV216087    |
| chr4  | 1.33E+08 | 1.33E+08 | Intergenic | Intergenic | -2325  | NM_00108 | 93760  | Arid1a    | 1110030E0   |
| chr11 | 1.2E+08  | 1.2E+08  | intron (NM | intron (NM | 48702  | NM_19842 | 268515 | Bahcc1    | B930044J0   |
| chr11 | 1.01E+08 | 1.01E+08 | promoter-1 | promoter-1 | -419   | NM_02445 | 19345  | Rab5c     | AI326010    |
| chr4  | 10845602 | 10845900 | Intergenic | Intergenic | 44106  | NM_02600 | 67157  | 2610301B2 | AI428449    |
| chr1  | 58859077 | 58859925 | 5' UTR (NV | 5' UTR (NV | 155    | NM_00108 | 12370  | Casp8     | CASP-8 FLI  |
| chr2  | 1.63E+08 | 1.63E+08 | intron (NM | intron (NM | 468    | NM_17215 | 245866 | Ift52     | BC037708    |
| chr12 | 86452052 | 86452125 | intron (NM | CpG        | 305    | NM_03022 | 78920  | Dlst      | 1600017E0   |
| chr3  | 60806777 | 60806925 | 5' UTR (NV | 5' UTR (NV | 144    | NM_00128 | 18441  | P2ry1     | P2Y1        |
| chr9  | 1.1E+08  | 1.1E+08  | exon (NM_  | exon (NM_  | 135    | NM_00921 | 20588  | Smarcc1   | AI115498    |

|       |          |          |                       |         |          |        |           |             |
|-------|----------|----------|-----------------------|---------|----------|--------|-----------|-------------|
| chr5  | 1.19E+08 | 1.19E+08 | exon (NM_exon (NM_    | 104     | NM_17272 | 231672 | Fbxw8     | 4930438M    |
| chr1  | 1.35E+08 | 1.35E+08 | promoter-1promoter-1  | -113    | NM_00109 | 240752 | Pik3c2b   | C330011J1   |
| chr12 | 77478577 | 77478700 | intron (NM_URR1A DN   | 7385    | NM_17874 | 268564 | Zbtb1     | 9430077A1   |
| chr11 | 31571627 | 31571875 | 5' UTR (NM_5' UTR (NM | 111     | NM_00102 | 69556  | Bod1      | 2310022M    |
| chr17 | 56812802 | 56813000 | intron (NR_CpG        | 253     | NM_02793 | 71810  | Ranbp3    | 2610024N2   |
| chr1  | 43991277 | 43991425 | intron (NM_CpG        | 499     | NM_00941 | 22019  | Tpp2      | TPP-2 Tpp1  |
| chr17 | 32176702 | 32177100 | intron (NM_intron (NM | 3794    | NM_02824 | 72462  | Rrp1b     | 2600005C2   |
| chr6  | 1.47E+08 | 1.47E+08 | 3' UTR (NM_3' UTR (NM | -28764  | NM_17230 | 272322 | Arntl2    | 4632430AC   |
| chr5  | 20694427 | 20694500 | intron (NM_intron (NM | 2378    | NM_17543 | 212167 | Gsap      | A530088I0   |
| chr3  | 66789752 | 66789875 | intron (NM_CpG        | 219     | NM_02582 | 66880  | Rsrc1     | 1200013F2   |
| chr8  | 13159277 | 13159375 | 5' UTR (NM_5' UTR (NM | 191     | NM_01068 | 16783  | Lamp1     | AI196048 I  |
| chr7  | 13608502 | 13608875 | promoter-1promoter-1  | -813    | NM_01158 | 21849  | Trim28    | AA408787    |
| chr4  | 1.37E+08 | 1.37E+08 | promoter-1promoter-1  | 22      | NM_19824 | 230848 | Zbtb40    | BC059177    |
| chr4  | 6379677  | 6379875  | intron (NM_intron (NM | 1642    | NM_01094 | 18201  | Nsmf      | AA959567    |
| chr17 | 34088102 | 34088225 | TTS (NM_0_TTS (NM_0   | 270     | NM_01942 | 54218  | B3galt4   | Gal-T2 Gal  |
| chr5  | 1.37E+08 | 1.37E+08 | Intergenic Lx6 LINE L | -8613   | NM_01196 | 26433  | Plod3     | AI414586 I  |
| chr13 | 56354802 | 56354950 | Intergenic Intergenic | -1352   | NM_01089 | 18014  | Neurog1   | AKA Mathv   |
| chr10 | 61968702 | 61968775 | intron (NM_intron (NM | 1765    | NM_01115 | 19073  | Srgn      | Prg Prg1 S  |
| chr9  | 63585777 | 63586025 | intron (NM_MTEa LTR   | 19900   | NM_01676 | 17127  | Smad3     | AU022421    |
| chr8  | 1.24E+08 | 1.24E+08 | intron (NM_intron (NM | 8305    | NM_13376 | 76454  | Fbxo31    | 1110003OC   |
| chr15 | 73939977 | 73940175 | Intergenic Intergenic | -269975 | NM_00103 | 268816 | Mroh5     | Gm628       |
| chr8  | 1.21E+08 | 1.21E+08 | intron (NM_intron (NM | 345683  | NM_01970 | 12554  | Cdh13     | 4932416GC   |
| chr5  | 1.23E+08 | 1.23E+08 | intron (NM_intron (NM | 8643    | NM_00119 | 207565 | Camkk2    | 6330570N1   |
| chr1  | 74213677 | 74213925 | Intergenic Intergenic | 13233   | NM_00990 | 12765  | Cxcr2     | CD128 CD1   |
| chr3  | 1.23E+08 | 1.23E+08 | promoter-1promoter-1  | 45      | NM_20163 | 210529 | Mettl14   | G430022H;   |
| chr14 | 45523802 | 45524250 | Intergenic Intergenic | -44976  | NM_00896 | 19214  | Ptgd      | DP PGD      |
| chr11 | 60231227 | 60231325 | promoter-1promoter-1  | 629     | NM_02575 | 66771  | Gid4      | 4933439F1   |
| chr4  | 1.16E+08 | 1.16E+08 | promoter-1promoter-1  | 543     | NM_15352 | 230654 | Lrrc41    | AA409966    |
| chr2  | 1.17E+08 | 1.17E+08 | Intergenic Intergenic | -7762   | NM_02662 | 68215  | Fam98b    | 2610510HC   |
| chrX  | 34624227 | 34625725 | intron (NM_intron (NM | 203     | NM_02605 | 67248  | Rpl39     | 2810465O1   |
| chr8  | 1.1E+08  | 1.1E+08  | promoter-1promoter-1  | -560    | NM_02583 | 66894  | Wwp2      | 1300010OC   |
| chr16 | 76527427 | 76527625 | Intergenic Intergenic | -154232 | NM_17344 | 268903 | Nrip1     | 6030458L2   |
| chr12 | 78153102 | 78153175 | Intergenic Intergenic | -89903  | NM_00114 | 17187  | Max       | AA960152    |
| chr7  | 87571102 | 87571475 | Intergenic (TCC)n Sir | -20971  | NM_00108 | 18550  | Furin     | 9130404I0:  |
| chr2  | 26768827 | 26769075 | TTS (NR_07_TTS (NR_07 | 2624    | NM_01372 | 27176  | Rpl7a     | Surf3       |
| chr13 | 58229952 | 58230200 | promoter-1promoter-1  | -159    | NM_02987 | 77134  | Hnrnpa0   | 1110055BC   |
| chr13 | 43344977 | 43345125 | intron (NMB1_Mur1 S   | 54490   | NM_00103 | 328232 | Gfod1     | 9630032O1   |
| chr12 | 1.04E+08 | 1.04E+08 | promoter-1promoter-1  | 3       | NM_02566 | 66622  | Ubr7      | 5730410I1!  |
| chr4  | 1.4E+08  | 1.4E+08  | intron (NM_intron (NM | 106920  | NM_00111 | 72754  | Arhgef10l | 2810441CC   |
| chr11 | 45740127 | 45740550 | Intergenic Intergenic | 18099   | NM_02818 | 72290  | Lsm11     | 2210404M    |
| chr9  | 1.23E+08 | 1.23E+08 | intron (NML4 LINE R1  | 19122   | NM_02691 | 69035  | Zdhhc3    | 1110020O2   |
| chr3  | 84469877 | 84470200 | promoter-1promoter-1  | -76     | NM_17726 | 320782 | Tmem154   | 9930117HC   |
| chr10 | 1.17E+08 | 1.17E+08 | Intergenic Intergenic | -27033  | NM_02445 | 215449 | Rap1b     | 2810443E1   |
| chr8  | 1.23E+08 | 1.23E+08 | intron (NM_CpG-14580  | 735     | NM_19867 | 382034 | Gse1      | 22100131I!  |
| chr1  | 1.59E+08 | 1.59E+08 | intron (NM_CpG        | 178     | NM_14541 | 215015 | Fam20b    | C530043G2   |
| chr3  | 68428802 | 68428975 | intron (NM_intron (NM | 52598   | NM_01392 | 30953  | Schip1    | Nf2ip Schij |
| chr4  | 86394777 | 86395000 | intron (NM_CpG        | 429     | NM_18408 | 329877 | Dennd4c   | 1700065AC   |

|       |          |          |            |            |         |           |        |          |            |
|-------|----------|----------|------------|------------|---------|-----------|--------|----------|------------|
| chr8  | 1.09E+08 | 1.09E+08 | intron (NM | intron (NM | 86295   | NM_17303  | 272538 | Tango6   | AW413431   |
| chr2  | 34227977 | 34228175 | promoter-1 | promoter-1 | -511    | NM_01676  | 18516  | Pbx3     | -          |
| chr9  | 83795827 | 83796075 | Intergenic | Intergenic | -46437  | NM_19919  | 12040  | Bckdhhb  | -          |
| chr9  | 1E+08    | 1E+08    | Intergenic | Intergenic | 40079   | NM_00103  | 213208 | Il20rb   | AV228068   |
| chr17 | 23966127 | 23966300 | promoter-1 | promoter-1 | -137    | NM_02630  | 67673  | Tceb2    | 0610040H1  |
| chr6  | 47763752 | 47763900 | promoter-1 | promoter-1 | -315    | NM_00978  | 12304  | Pdia4    | AI987846 I |
| chr2  | 1.7E+08  | 1.7E+08  | Intergenic | Intergenic | -11051  | NM_00115  | 228913 | Zfp217   | 4933431CC  |
| chr10 | 1.27E+08 | 1.27E+08 | promoter-1 | promoter-1 | -624    | NM_03307  | 110962 | Mbd6     | D10Wsu93   |
| chr1  | 84936877 | 84937225 | Intergenic | Intergenic | -5393   | NM_02792  | 71781  | Slc16a14 | 1110004H1  |
| chr10 | 1.17E+08 | 1.17E+08 | promoter-1 | promoter-1 | 54      | NM_17779  | 327826 | Frs2     | 4732458E1  |
| chr18 | 12812502 | 12812575 | intron (NM | intron (NM | 10496   | NM_02834  | 72747  | Ttc39c   | 1700008NC  |
| chr13 | 55629127 | 55629275 | intron (NM | intron (NM | 698     | NM_01373  | 27261  | Dok3     | AI450713 I |
| chr4  | 1.39E+08 | 1.39E+08 | promoter-1 | promoter-1 | 449     | NM_00103  | 12345  | Capzb    | 1700120CC  |
| chr10 | 7401077  | 7401225  | promoter-1 | promoter-1 | 144     | NM_01069  | 16798  | Lats1    | AW208599   |
| chr4  | 41222527 | 41222875 | promoter-1 | promoter-1 | -533    | NM_02687  | 68926  | Ubp2     | 1190005KC  |
| chrX  | 39561452 | 39561650 | intron (NM | intron (NM | 6519    | NM_00129  | 20843  | Stag2    | 9230105L2  |
| chr6  | 50327727 | 50327800 | intron (NM | intron (NM | 5073    | NM_02788  | 71720  | Osbpl3   | 1200014M   |
| chr2  | 94278002 | 94278325 | 5' UTR (NV | 5' UTR (NV | 141     | NM_00746  | 11800  | Api5     | AAC-11 AI: |
| chr3  | 1.29E+08 | 1.29E+08 | Intergenic | ID_B1 SINI | -38066  | NM_13045  | 170439 | Elovl6   | C77826 FA  |
| chr11 | 60988327 | 60988450 | 5' UTR (NV | 5' UTR (NV | 173     | NM_00100  | 216825 | Usp22    | AI427806   |
| chr4  | 1.18E+08 | 1.18E+08 | Intergenic | Intergenic | -15311  | NM_14631  | 18363  | Olfr62   | H12 IH12   |
| chr2  | 24200527 | 24200950 | promoter-1 | promoter-1 | -73     | NM_00115  | 16181  | Il1rn    | F630041P1  |
| chr9  | 1.24E+08 | 1.24E+08 | promoter-1 | promoter-1 | -13     | NM_03332  | 93730  | Lztfl1   | 5530402HC  |
| chr3  | 88268627 | 88268850 | Intergenic | Intergenic | -3634   | NM_00116  | 20351  | Sema4a   | AI132332 : |
| chr4  | 1.49E+08 | 1.49E+08 | promoter-1 | promoter-1 | -4      | NM_02696  | 69151  | Lzic     | 1810030JO  |
| chr13 | 55313627 | 55314050 | intron (NM | CpG        | 2695    | NM_00873  | 18193  | Nsd1     | AI528500 I |
| chr11 | 1.16E+08 | 1.16E+08 | promoter-1 | promoter-1 | -333    | NM_00824  | 15223  | Foxj1    | FKHL-13 H  |
| chr4  | 1.55E+08 | 1.55E+08 | 5' UTR (NV | 5' UTR (NV | 337     | NM_00125  | 76580  | Mib2     | 22100081:  |
| chr15 | 36537477 | 36538200 | intron (NM | CpG        | 890     | NM_00877  | 18458  | Pabpc1   | PABP Pabp  |
| chr15 | 97611002 | 97611275 | Intergenic | Intergenic | -3658   | NM_02635  | 67739  | Slc48a1  | 4930570CC  |
| chr18 | 15764352 | 15764475 | intron (NM | intron (NM | 112142  | NM_19905  | 71367  | Chst9    | 5430438DC  |
| chr12 | 11272927 | 11273075 | promoter-1 | promoter-1 | 309     | NM_02569  | 67241  | Smc6     | 2810489L2  |
| chr4  | 1.2E+08  | 1.2E+08  | promoter-1 | promoter-1 | 20      | NM_00127  | 18046  | Nfyc     | -          |
| chr15 | 78156277 | 78156500 | promoter-1 | promoter-1 | -32     | NM_00778  | 12983  | Csf2rb   | AI848964 , |
| chr5  | 53658777 | 53658850 | intron (NM | intron (NM | 468     | NM_00114  | 66278  | Smim20   | 1110067B1  |
| chr18 | 61716152 | 61716400 | intron (NM | intron (NM | 1040    | NM_14608  | 93687  | Csnk1a1  | 2610208K1  |
| chr5  | 24348702 | 24349125 | promoter-1 | promoter-1 | -734    | NM_05307  | 19744  | Rheb     | -          |
| chr2  | 72901952 | 72902225 | Intergenic | MIRb SINE  | -83585  | NM_00101  | 20687  | Sp3      | D130027JO  |
| chr16 | 22350102 | 22350250 | Intergenic | Intergenic | -84174  | NM_00918  | 20462  | Tra2b    | 5730405G2  |
| chr17 | 56146327 | 56146425 | Intergenic | Intergenic | -1347   | NR_10231: | 106766 | Stap2    | AW049765   |
| chr5  | 1.08E+08 | 1.08E+08 | intron (NM | intron (NM | 19438   | NM_00796  | 14020  | Evi5     | NB4S       |
| chr6  | 89545302 | 89545525 | intron (NM | CpG        | 233     | NM_02535  | 66098  | Chchd6   | 0710001PC  |
| chr14 | 52816277 | 52816525 | intron (NM | CpG        | 513     | NM_03361  | 114741 | Supt16   | Cdc68 FacI |
| chr15 | 85161702 | 85161900 | Intergenic | B1F2 SINE  | -5010   | NM_01684  | 54138  | Atxn10   | AI325283 I |
| chr19 | 45282377 | 45282650 | Intergenic | Intergenic | 27213   | NM_01069  | 16814  | Lbx1     | Lbx1h      |
| chr17 | 71649752 | 71650000 | intron (NM | intron (NM | 10429   | NM_14515  | 246707 | Emilin2  | FOAP-10    |
| chr10 | 95236152 | 95236400 | Intergenic | Intergenic | -167021 | NM_00100  | 216238 | Eea1     | A430109M   |



|       |          |          |            |            |         |           |        |          |              |
|-------|----------|----------|------------|------------|---------|-----------|--------|----------|--------------|
| chr8  | 1.31E+08 | 1.31E+08 | Intergenic | Intergenic | -1010   | NM_00873  | 18186  | Nrp1     | C53002910    |
| chr16 | 87700327 | 87700550 | intron (NM | intron (NM | 1239    | NM_00752  | 12013  | Bach1    | 6230421PC    |
| chr13 | 37972277 | 37972550 | intron (NM | intron (NM | -7890   | NR_033218 | 68750  | Rreb1    | 1110037NC    |
| chr16 | 44746327 | 44746425 | promoter-1 | promoter-1 | 100     | NM_00115  | 66067  | Gtpbp8   | 0610037H2    |
| chr11 | 69727202 | 69727400 | promoter-1 | promoter-1 | -393    | NM_01972  | 56310  | Gps2     | AI505953     |
| chr6  | 1.01E+08 | 1.01E+08 | intron (NM | ORR1D1 L   | 54938   | NM_18159  | 72171  | Shq1     | 2810403P1    |
| chr5  | 1.24E+08 | 1.24E+08 | intron (NM | intron (NM | 3174    | NM_00104  | 208043 | Setd1b   | AA516740     |
| chr13 | 98711902 | 98712225 | intron (NM | ID4_ SINE  | 264057  | NM_01202  | 110596 | Arhgef28 | 9230110LO    |
| chr5  | 1.5E+08  | 1.5E+08  | intron (NM | intron (NM | 7742    | NM_00966  | 11690  | Alox5ap  | Flap         |
| chr5  | 1.44E+08 | 1.44E+08 | Intergenic | Intergenic | -14085  | NM_00739  | 11461  | Actb     | Actx E430C   |
| chr4  | 1.34E+08 | 1.34E+08 | promoter-1 | promoter-1 | -772    | NM_01964  | 16765  | Stmn1    | 19k Lag Lc   |
| chr2  | 1.29E+08 | 1.29E+08 | promoter-1 | promoter-1 | -57     | NM_00836  | 16176  | Il1b     | IL-1beta Il- |
| chr2  | 1.65E+08 | 1.65E+08 | promoter-1 | promoter-1 | -80     | NM_00108  | 415115 | Neur12   | Neur2 Ozz    |
| chr9  | 96537727 | 96537900 | Intergenic | Intergenic | -5891   | NM_05326  | 114713 | Rasa2    | 5430433H2    |
| chr8  | 83267427 | 83267550 | Intergenic | Lx7 LINE L | -4130   | NM_05312  | 93762  | Smarca5  | 4933427E2    |
| chr3  | 1.58E+08 | 1.58E+08 | intron (NM | intron (NM | 25630   | NM_00128  | 67144  | Lrrc40   | 2610040E1    |
| chr15 | 97923827 | 97923925 | 5' UTR (NV | 5' UTR (NV | 124     | NM_14485  | 223870 | Senp1    | 2310046A2    |
| chr3  | 88927402 | 88927575 | Intergenic | Intergenic | -12576  | NM_01363  | 18770  | Pklr     | Pk-1 Pk1 F   |
| chr12 | 1.18E+08 | 1.18E+08 | Intergenic | Intergenic | -16305  | NM_01121  | 19276  | Ptprn2   | 4930425H1    |
| chr7  | 71537727 | 71537800 | promoter-1 | promoter-1 | 106     | NM_02862  | 73724  | Mcee     | 1110007AC    |
| chr1  | 1.52E+08 | 1.52E+08 | promoter-1 | promoter-1 | -99     | NM_00886  | 18783  | Pla2g4a  | Pla2g4 cPL   |
| chr17 | 29089577 | 29089775 | promoter-1 | promoter-1 | -485    | NM_02588  | 66989  | Kctd20   | 2410004N1    |
| chr16 | 75933552 | 75933825 | Intergenic | Intergenic | -24177  | NM_02338  | 67742  | Samsn1   | 4930571B1    |
| chr4  | 24423127 | 24423275 | promoter-1 | promoter-1 | -408    | NM_19946  | 212377 | Mms22l   | F730047E0    |
| chr7  | 88027977 | 88028075 | Intergenic | Intergenic | 18129   | NM_02802  | 71968  | Wdr73    | 1200011I2:   |
| chr2  | 1.21E+08 | 1.21E+08 | intron (NM | intron (NM | 299     | NM_14597  | 269344 | Elf3     | A930015D:    |
| chr8  | 89290652 | 89290850 | Intergenic | Intergenic | -20846  | NM_00917  | 20437  | Siah1a   | AA982064     |
| chr8  | 87501502 | 87501600 | exon (NM_  | exon (NM_  | 1096    | NM_00841  | 16477  | Junb     | -            |
| chr1  | 1.83E+08 | 1.83E+08 | Intergenic | Intergenic | -4412   | NM_17709  | 320202 | Lefty2   | 6030463A2    |
| chr5  | 1.16E+08 | 1.16E+08 | promoter-1 | promoter-1 | 119     | NM_02964  | 384281 | Gatc     | 2010003O1    |
| chrX  | 54306477 | 54306550 | promoter-1 | promoter-1 | -234    | NM_02824  | 72459  | Htatsf1  | 1600023H1    |
| chr16 | 14317252 | 14317375 | intron (NM | CpG        | 112     | NM_02534  | 66086  | Fopnl    | 0610037PC    |
| chr6  | 1.13E+08 | 1.13E+08 | promoter-1 | promoter-1 | -149    | NM_13393  | 101206 | Tada3    | 1110004B1    |
| chr6  | 52167302 | 52167500 | exon (NM_  | exon (NM_  | 1171    | NM_01045  | 15404  | Hoxa7    | AV118143     |
| chr17 | 28466677 | 28466875 | intron (NM | intron (NM | 1360    | NM_01128  | 19896  | Rpl10a   | CsA-19 Ne    |
| chr15 | 27805477 | 27805750 | intron (NM | intron (NM | 149990  | NM_00108  | 223435 | Trio     | 6720464I0    |
| chr8  | 26864852 | 26865125 | promoter-1 | promoter-1 | -236    | NM_02810  | 72108  | Ddhd2    | 2010305K1    |
| chr8  | 93489552 | 93489625 | intron (NM | L1MC4a LI  | -104368 | NM_00128  | 19651  | Rbl2     | PRB2 RBR-    |
| chr12 | 1.18E+08 | 1.18E+08 | intron (NM | intron (NM | 45068   | NM_02873  | 52635  | Esyt2    | 2410017M     |
| chr1  | 1.9E+08  | 1.9E+08  | intron (NM | RSINE1 SIN | 170328  | NM_00124  | 26381  | Esrrg    | ERR3 Errg    |
| chr12 | 32035877 | 32036025 | intron (NM | CpG        | 385     | NM_00786  | 13382  | Dld      | -            |
| chr3  | 28070277 | 28070475 | Intergenic | MER20 DN   | -91760  | NM_00116  | 665113 | Tnik     | 1500031A1    |
| chr8  | 18846527 | 18846775 | exon (NM_  | exon (NM_  | 372     | NM_02679  | 52123  | Agpat5   | 1110013AC    |
| chr1  | 1.34E+08 | 1.34E+08 | exon (NM_  | exon (NM_  | 274     | NM_00119  | 74137  | Nuak2    | 1200013B2    |
| chr15 | 1.01E+08 | 1.01E+08 | Intergenic | B1F SINE , | -18680  | NM_00739  | 11479  | Acvr1b   | 6820432J0    |
| chr10 | 1.15E+08 | 1.15E+08 | 5' UTR (NV | 5' UTR (NV | 221     | NM_02445  | 216344 | Rab21    | 9630024B2    |
| chr14 | 73809952 | 73810200 | Intergenic | Intergenic | -24998  | NM_00841  | 16432  | Itm2b    | AI256040 I   |

|       |          |          |            |            |         |          |        |          |            |
|-------|----------|----------|------------|------------|---------|----------|--------|----------|------------|
| chr11 | 1.18E+08 | 1.18E+08 | intron (NM | intron (NM | 42673   | NM_19802 | 217351 | Tnrc6c   | 9930033H1  |
| chr15 | 76181727 | 76182050 | promoter-1 | promoter-1 | 164     | NM_02685 | 68877  | Maf1     | 1110068E1  |
| chr11 | 98227627 | 98227875 | intron (NM | intron (NM | 8069    | NM_02154 | 59045  | Stard3   | Mln64 es6  |
| chr19 | 28084877 | 28085050 | intron (NM | intron (NM | 693     | NM_01126 | 19726  | Rfx3     | C230093O:  |
| chr1  | 1.93E+08 | 1.93E+08 | Intergenic | Intergenic | -17964  | NM_00749 | 11910  | Atf3     | LRG-21     |
| chr15 | 86013377 | 86013500 | intron (NM | intron (NM | 3133    | NM_14547 | 223753 | Cerk     | AI848610 I |
| chr18 | 10029677 | 10029875 | intron (NM | CpG        | 371     | NM_02152 | 59025  | Usp14    | 2610005K1  |
| chr6  | 1.16E+08 | 1.16E+08 | intron (NM | intron (NM | 9815    | NM_02978 | 110157 | Raf1     | 6430402F1  |
| chr11 | 65609427 | 65609600 | Intergenic | B4A SINE   | -7714   | NM_00915 | 26398  | Map2k4   | JNKK1 MEI  |
| chr5  | 96592127 | 96592300 | Intergenic | Intergenic | -1204   | NM_14491 | 231464 | Cnot6l   | 4932442K2  |
| chr15 | 71427552 | 71427650 | intron (NM | ORR1E LTF  | 130667  | NM_17781 | 70363  | Fam135b  | 1700010C2  |
| chr2  | 1.2E+08  | 1.2E+08  | promoter-1 | promoter-1 | -636    | NM_00111 | 211499 | Tmem87a  | A930025J1  |
| chr2  | 1.03E+08 | 1.03E+08 | 5' UTR (NM | 5' UTR (NM | 234     | NM_00117 | 12505  | Cd44     | AU023126   |
| chr13 | 94710852 | 94710975 | 3' UTR (NM | 3' UTR (NM | -116838 | NM_17258 | 218454 | Lhfp12   | 6030465B1  |
| chr9  | 59060852 | 59060950 | Intergenic | Lx8 LINE L | -78478  | NM_02812 | 72141  | Adpgk    | 2610017G0  |
| chr6  | 99473027 | 99473400 | Intergenic | Intergenic | -87874  | NM_05320 | 108655 | Foxp1    | 3110052D1  |
| chr14 | 68398452 | 68398525 | intron (NM | intron (NM | 35202   | NM_00814 | 14714  | Gnrh1    | Gnrh Gnrh  |
| chr11 | 78272477 | 78272800 | Intergenic | ORR1D2 L   | -6565   | NM_02674 | 52466  | Slc46a1  | 1110002CC  |
| chr12 | 85313377 | 85313700 | Intergenic | Intergenic | -15273  | NM_13418 | 171210 | Acot2    | AA571646   |
| chr1  | 1.73E+08 | 1.73E+08 | promoter-1 | promoter-1 | -25     | NM_01204 | 27045  | Nit1     | AI255805 I |
| chr7  | 20520727 | 20521025 | Intergenic | RMER19A    | -14384  | NM_02751 | 52118  | Pvr      | 3830421F0  |
| chr16 | 4963977  | 4964175  | promoter-1 | promoter-1 | 254     | NM_02830 | 72615  | Anks3    | 2700067D0  |
| chr7  | 1.06E+08 | 1.06E+08 | Intergenic | Intergenic | 70494   | NM_00111 | 434215 | Lrrc32   | AI426318 I |
| chr4  | 94269402 | 94269550 | intron (NM | CpG        | 462     | NM_17269 | 18786  | Plaa     | 2410007N0  |
| chr11 | 84683077 | 84683275 | intron (NM | CpG        | 1064    | NM_15314 | 217039 | Ggnbp2   | AI451896 I |
| chr14 | 65059052 | 65059300 | intron (NM | intron (NM | 687     | NM_00125 | 110265 | Msra     | 2310045J2  |
| chr12 | 85481277 | 85481425 | 3' UTR (NM | 3' UTR (NM | 8088    | NM_02743 | 70481  | Pnma1    | 5730402C1  |
| chr1  | 8880377  | 8880575  | intron (NM | ETnERV3-ir | 409482  | NM_00129 | 71096  | Sntg1    | 4933426D1  |
| chr3  | 1.33E+08 | 1.33E+08 | promoter-1 | promoter-1 | 27      | NM_14614 | 74776  | Ppa2     | 1110013G1  |
| chr7  | 1.21E+08 | 1.21E+08 | intron (NM | CpG        | 218     | NM_03337 | 70349  | Copb1    | 2610019BC  |
| chr5  | 1.23E+08 | 1.23E+08 | promoter-1 | promoter-1 | -52     | NM_01980 | 56317  | Anapc7   | APC7 AW5   |
| chr9  | 78381052 | 78381425 | Intergenic | Intergenic | -51707  | NM_01010 | 13627  | Eef1a1   | -          |
| chr5  | 1.3E+08  | 1.3E+08  | promoter-1 | promoter-1 | 60      | NM_02545 | 66258  | Mrps17   | 1810006P0  |
| chr1  | 1.33E+08 | 1.33E+08 | intron (NM | intron (NM | 13769   | NM_00855 | 17164  | Mapkapk2 | AA960234   |
| chr2  | 35057152 | 35057275 | promoter-1 | promoter-1 | -573    | NM_02669 | 68365  | Rab14    | 0610030G2  |
| chr2  | 1.25E+08 | 1.25E+08 | intron (NM | intron (NM | 49948   | NM_00799 | 14118  | Fbn1     | AI536462 I |
| chr4  | 1.07E+08 | 1.07E+08 | intron (NR | CpG-10126  | 1287    | NM_00108 | 16975  | Lrp8     | 4932703M   |
| chr1  | 1.31E+08 | 1.31E+08 | Intergenic | Intergenic | -50112  | NM_00991 | 12767  | Cxcr4    | CD184 Cm   |
| chr2  | 69560877 | 69561325 | promoter-1 | promoter-1 | -44     | NM_00108 | 228005 | Ppig     | AU019516   |
| chr19 | 41529777 | 41529925 | Intergenic | RMER19B    | -70291  | NM_03137 | 83490  | Pik3ap1  | 1810044J0  |
| chr10 | 98569477 | 98569900 | promoter-1 | promoter-1 | -117    | NM_02774 | 382406 | Poc1b    | 4933430F1  |
| chr6  | 1.18E+08 | 1.18E+08 | Intergenic | CpG        | 16393   | NM_00100 | 22685  | Zfp239   | Mok-2 Mo   |
| chr6  | 87450077 | 87450175 | intron (NM | intron (NM | -3805   | NM_17547 | 232201 | Arhgap25 | A130039I2  |
| chr5  | 1.4E+08  | 1.4E+08  | intron (NM | intron (NM | 2097    | NM_17700 | 319772 | C1300500 | -          |
| chr9  | 69290502 | 69290875 | Intergenic | Intergenic | -10802  | NM_00758 | 12306  | Anxa2    | AW215814   |
| chr7  | 89750727 | 89750850 | exon (NM   | exon (NM   | 46250   | NM_17789 | 330577 | Fam154b  | 1700129I0  |
| chr19 | 55328227 | 55328400 | 5' UTR (NM | 5' UTR (NM | 454     | NM_02797 | 433256 | Acsl5    | 1700030F0  |

|       |          |          |                       |         |          |        |            |            |
|-------|----------|----------|-----------------------|---------|----------|--------|------------|------------|
| chr3  | 1.26E+08 | 1.26E+08 | intron (NMLx6 LINE L  | 15994   | NM_02381 | 108058 | Camk2d     | 2810011D2  |
| chr11 | 72156227 | 72156475 | Intergenic Intergenic | 18447   | NM_00128 | 21689  | Tekt1      | MT14       |
| chr4  | 97770827 | 97771250 | intron (NM intron (NM | 278918  | NM_05315 | 94043  | Tm2d1      | 2310026L1  |
| chr16 | 19963327 | 19963425 | intron (NMLx8 LINE L  | 19746   | NM_18339 | 239743 | Klh6       | -          |
| chr9  | 20632202 | 20632475 | Intergenic B3A SINE   | 9390    | NM_00103 | 235033 | Rdh8       | Gm182 prl  |
| chr17 | 28168327 | 28168475 | intron (NML1ME2z LI   | 49128   | NM_01368 | 21463  | Tcp11      | D17Ken1 T  |
| chr7  | 82740977 | 82741200 | intron (NM intron (NM | 140668  | NM_02933 | 75547  | Akap13     | 1700026GC  |
| chr2  | 79094727 | 79094950 | promoter-1promoter-1  | -745    | NM_01057 | 16401  | Itga4      | CD49D Itga |
| chr17 | 45082327 | 45082425 | intron (NM intron (NM | -64542  | NM_02925 | 75341  | 4930564CC- | -          |
| chr4  | 1.05E+08 | 1.05E+08 | Intergenic Intergenic | -8189   | NM_08055 | 67916  | Ppap2b     | 1110003O2  |
| chr19 | 47083952 | 47084100 | intron (NML1MC4a LI   | -5162   | NM_14610 | 226180 | Ina        | AV028420   |
| chr11 | 51076727 | 51076950 | promoter-1promoter-1  | 165     | NM_00771 | 12750  | Clk4       | AI987988 c |
| chr11 | 83453677 | 83454050 | Intergenic Intergenic | 9017    | NM_01133 | 20302  | Ccl3       | AI323804 c |
| chr7  | 51629652 | 51630100 | 5' UTR (NM 5' UTR (NM | 524     | NM_02704 | 69349  | 1700008O(- | -          |
| chr19 | 46723227 | 46723325 | intron (NM intron (NM | 24214   | NM_00780 | 13074  | Cyp17a1    | Cyp17 p45  |
| chr16 | 30188177 | 30188375 | Intergenic Intergenic | 79342   | NM_02790 | 71756  | Cpn2       | 1300018K1  |
| chr10 | 1.28E+08 | 1.28E+08 | intron (NM intron (NM | 711     | NM_01681 | 13139  | Dgka       | 80kDa AW   |
| chr11 | 87882602 | 87882700 | intron (NMCpG         | 870     | NM_01668 | 22344  | Vezf1      | AI848691 , |
| chr1  | 1.66E+08 | 1.66E+08 | Intergenic RLTR45 LT  | -39102  | NM_00972 | 11931  | Atp1b1     | Atp4b Atp  |
| chr11 | 96230627 | 96230850 | Intergenic Intergenic | 3666    | NM_00826 | 15407  | Hoxb1      | Hox-2.9    |
| chr11 | 51885352 | 51885625 | intron (NM intron (NM | -26838  | NM_01941 | 19052  | Ppp2ca     | PP2A R753  |
| chr6  | 18026727 | 18026875 | intron (NM intron (NM | 32260   | NM_02372 | 74068  | Asz1       | 4933400N1  |
| chr1  | 1.93E+08 | 1.93E+08 | intron (NM intron (NM | 12373   | NM_17877 | 320119 | Rps6kc1    | AA682037   |
| chr18 | 24178727 | 24178925 | intron (NMCpG         | 446     | NM_02155 | 59057  | Zfp191     | 3526401F1  |
| chr15 | 76554627 | 76554800 | promoter-1promoter-1  | -438    | NM_17682 | 223665 | C030006K1  | 111003311: |
| chr1  | 1.57E+08 | 1.57E+08 | Intergenic Intergenic | 15115   | NM_01050 | 15939  | Ier5       | -          |
| chr2  | 1.53E+08 | 1.53E+08 | Intergenic Intergenic | -17641  | NM_00117 | 15162  | Hck        | AI849071   |
| chr13 | 93300252 | 93301000 | intron (NMCpG         | 139     | NM_17339 | 218441 | Zfyve16    | AI035632   |
| chr11 | 97223902 | 97223975 | promoter-1promoter-1  | 73      | NM_13865 | 192157 | Socs7      | 2310063PC  |
| chr9  | 77676377 | 77676675 | Intergenic L1_Rod LI  | 74184   | NM_01029 | 14629  | Gclc       | D9Wsu168   |
| chr8  | 73158402 | 73158500 | Intergenic Intergenic | -2917   | NM_01181 | 23886  | Gdf15      | MIC-1 NAC  |
| chr1  | 55470502 | 55470575 | intron (NM intron (NM | 7748    | NM_00111 | 227120 | Plcl1      | C230017KC  |
| chr18 | 55013302 | 55013400 | Intergenic Intergenic | 136483  | NM_17575 | 269023 | Zfp608     | 4932417D1  |
| chr1  | 1.53E+08 | 1.53E+08 | promoter-1promoter-1  | -802    | NM_00103 | 117198 | Ivns1abp   | 1190004M   |
| chr17 | 37116302 | 37116400 | intron (NMRsINE1 SIN  | 1831    | NM_02974 | 76797  | 2410137M-  | -          |
| chr16 | 35932727 | 35933025 | exon (NM_ exon (NM_   | -5680   | NM_03025 | 80285  | Parp9      | ARTD9 AW   |
| chr11 | 83561327 | 83561575 | intron (NM intron (NM | 1009    | NM_18324 | 66107  | Wfdc21     | 1100001G2  |
| chr10 | 77559402 | 77559600 | Intergenic Intergenic | 27388   | NM_01579 | 50723  | Icosl      | AU044799   |
| chr6  | 1.16E+08 | 1.16E+08 | intron (NM intron (NM | 19800   | NM_02658 | 28006  | Fam21      | A130095H(  |
| chr3  | 1.28E+08 | 1.28E+08 | promoter-1promoter-1  | -353    | NM_14596 | 211556 | Ap1ar      | AA407621   |
| chr3  | 1.03E+08 | 1.03E+08 | intron (NM intron (NM | -16482  | NM_01093 | 18176  | Nras       | AV095280   |
| chr3  | 1.32E+08 | 1.32E+08 | Intergenic Intergenic | -193193 | NM_02026 | 56811  | Dkk2       | -          |
| chr11 | 69494527 | 69494600 | intron (NM intron (NM | 909     | NM_03070 | 80886  | Senp3      | AA408656   |
| chr5  | 1.11E+08 | 1.11E+08 | intron (NMCpG         | 373     | NM_02933 | 75560  | Ep400      | 1700020JO  |
| chr5  | 97352352 | 97352600 | Intergenic Intergenic | -74232  | NM_08070 | 140780 | Bmp2k      | 4933417M   |
| chr1  | 1.61E+08 | 1.61E+08 | Intergenic Intergenic | -45231  | NM_01193 | 26374  | Rfwd2      | AI316802 c |
| chr15 | 34425302 | 34425475 | promoter-1promoter-1  | 322     | NM_15289 | 67724  | Pop1       | 4932434GC  |

|       |          |          |             |             |         |           |        |          |            |
|-------|----------|----------|-------------|-------------|---------|-----------|--------|----------|------------|
| chr14 | 70451652 | 70451725 | intron (NM  | intron (NM  | -25564  | NM_01878  | 13655  | Egr3     | Pilot      |
| chr2  | 1.27E+08 | 1.27E+08 | non-coding  | non-coding  | 115     | NM_00127  | 14391  | Gabpb1   | BABPB2 E4  |
| chr18 | 57404177 | 57404525 | intron (NM  | intron (NM  | -110036 | NM_02844  | 73137  | Prrc1    | 1190002CC  |
| chr13 | 68720652 | 68720825 | promoter-1  | promoter-1  | 260     | NM_17248  | 210009 | Mtrr     | 4732420GC  |
| chr10 | 1.26E+08 | 1.26E+08 | promoter-1  | promoter-1  | 51      | NM_02685  | 68876  | Xrcc6bp1 | 1110068E0  |
| chr9  | 1.14E+08 | 1.14E+08 | TTS (NM_0   | TTS (NM_0   | 46299   | NM_01369  | 22221  | Ubp1     | Cp2b LBP-  |
| chr16 | 38415077 | 38415325 | intron (NM  | intron (NM  | 18024   | NM_13410  | 85031  | Pla1a    | AA986889   |
| chr19 | 47644577 | 47644725 | Intergenic  | Intergenic  | -9858   | NM_00928  | 20874  | Slk      | 9A2 AV021  |
| chr7  | 1.28E+08 | 1.28E+08 | Intergenic  | tRNA-Leu-C  | -7332   | NM_00790  | 13631  | Eef2k    | C86191 eE  |
| chr14 | 66851402 | 66851625 | intron (NM  | intron (NM  | -19124  | NM_00116  | 19229  | Ptk2b    | CADTK CAI  |
| chr16 | 36334377 | 36334800 | promoter-1  | promoter-1  | -170    | NM_00100  | 1E+08  | BC117090 | Gm1975     |
| chr9  | 78311302 | 78311500 | intron (NM  | intron (NM  | 15384   | NM_02665  | 68291  | Mto1     | 2310039HC  |
| chr3  | 1.58E+08 | 1.58E+08 | exon (NM_   | exon (NM_   | 246     | NM_00101  | 433667 | Ankrd13c | AI505652 , |
| chr2  | 38888102 | 38888450 | intron (NR_ | intron (NR_ | 24617   | NM_02880  | 74192  | Arcp5l   | 2010015J0  |
| chr4  | 65886377 | 65886550 | intron (NM  | intron (NM  | 179054  | NM_01951  | 56079  | Astn2    | 1d8 Astnl  |
| chr1  | 75206327 | 75206450 | intron (NM  | intron (NM  | 965     | NM_02901  | 74577  | Glb1l    | 4833408P1  |
| chr9  | 50873652 | 50873775 | intron (NM  | intron (NM  | 11486   | NM_00103  | 244864 | Layn     | E030012M   |
| chr1  | 1.67E+08 | 1.67E+08 | intron (NM  | intron (NM  | 4112    | NM_17302  | 271639 | Adcy10   | 4930431DC  |
| chr11 | 1.15E+08 | 1.15E+08 | intron (NM  | intron (NM  | 3959    | NM_02141  | 58222  | Rab37    | B230331OC  |
| chr15 | 96115852 | 96116000 | Intergenic  | CpG         | -2027   | NM_17525  | 77044  | Arid2    | 1700124K1  |
| chr15 | 39157427 | 39157675 | intron (NM  | RMER19B     | 127719  | NM_05327  | 116838 | Rims2    | 28100361!  |
| chr11 | 82608827 | 82609200 | intron (NM  | intron (NM  | 14402   | NM_01071  | 16882  | Lig3     | D11Wsu78   |
| chr1  | 57012377 | 57012450 | intron (NM  | intron (NM  | 15765   | NM_13914  | 212712 | Satb2    | mKIAA1034  |
| chr15 | 1E+08    | 1E+08    | promoter-1  | promoter-1  | 70      | NR_104338 | 207818 | Smaggp   | -          |
| chr7  | 26221727 | 26222100 | intron (NR_ | intron (NR_ | -24008  | NM_15357  | 232983 | Cxcl17   | VCC-1 Vcc: |
| chr11 | 1.06E+08 | 1.06E+08 | intron (NM  | intron (NM  | -47233  | NM_01049  | 15896  | Icam2    | CD102 Ica: |
| chr7  | 1.48E+08 | 1.48E+08 | promoter-1  | promoter-1  | 64      | NM_00108  | 101471 | Phrf1    | AA673488   |
| chr10 | 80630827 | 80630900 | promoter-1  | promoter-1  | -398    | NM_02150  | 59004  | Pias4    | PIASY Pias |
| chr5  | 15832852 | 15832975 | intron (NM  | intron (NM  | -226400 | NM_00128  | 15234  | Hgf      | C230052L0  |
| chr6  | 1.25E+08 | 1.25E+08 | intron (NM  | CpG         | 828     | NM_00808  | 14433  | Gapdh    | Gapd       |
| chr2  | 69723602 | 69724000 | promoter-1  | promoter-1  | -129    | NR_110977 | 75422  | Mettl5   | 2810410AC  |
| chr1  | 1.53E+08 | 1.53E+08 | intron (NM  | CpG         | 660     | NM_00103  | 117198 | Ivns1abp | 1190004M   |
| chr11 | 61743302 | 61743500 | intron (NM  | CpG         | 358     | NM_01992  | 56697  | Akap10   | 1500031L1  |
| chr5  | 1.11E+08 | 1.11E+08 | intron (NM  | CpG-11321   | 690     | NM_14514  | 107999 | Gtpbp6   | AV119224   |
| chr17 | 64198152 | 64198400 | Intergenic  | Intergenic  | -15054  | NM_00103  | 14158  | Fert2    | AV082135   |
| chr8  | 1.28E+08 | 1.28E+08 | promoter-1  | promoter-1  | -259    | NM_01690  | 53424  | Tsnax    | R74833 Tr: |
| chr18 | 60912752 | 60912825 | Intergenic  | (CAGAGA)r   | -21462  | NM_02060  | 20044  | Rps14    | 2600014J0  |
| chr7  | 1.35E+08 | 1.35E+08 | promoter-1  | promoter-1  | -384    | NM_00929  | 20909  | Stx4a    | Stx4 Syn-4 |
| chr4  | 32792827 | 32793050 | intron (NM  | intron (NM  | 48844   | NM_00108  | 100019 | Mdn1     | 4833432B2  |
| chr2  | 30319777 | 30319925 | Intergenic  | Intergenic  | 9868    | NM_03024  | 72500  | Ier5l    | 2610524GC  |
| chr11 | 84798977 | 84799175 | 3' UTR (NV  | 3' UTR (NV  | 27820   | NM_00760  | 12351  | Car4     | AW456718   |
| chr10 | 75243827 | 75243975 | 5' UTR (NV  | 5' UTR (NV  | 258     | NM_13399  | 103140 | Gstt3    | AI118089   |
| chr1  | 1.81E+08 | 1.81E+08 | intron (NM  | intron (NM  | 14666   | NM_14610  | 226744 | Cnst     | 9630058J2  |
| chr19 | 40905502 | 40905700 | promoter-1  | promoter-1  | -168    | NM_17283  | 240665 | Ccnj     | D430039C2  |
| chr8  | 73051702 | 73051825 | promoter-1  | promoter-1  | 18      | NM_00119  | 14232  | Fkbp8    | 38kDa FKB  |
| chr5  | 1.14E+08 | 1.14E+08 | intron (NM  | intron (NM  | 455     | NM_02552  | 66383  | Iscu     | 2310020H2  |
| chr3  | 1.46E+08 | 1.46E+08 | promoter-1  | promoter-1  | 426     | NM_01031  | 14707  | Gng5     | G(y)5      |

|       |          |          |                       |                  |                  |             |
|-------|----------|----------|-----------------------|------------------|------------------|-------------|
| chr6  | 1.16E+08 | 1.16E+08 | intron (NM MIR SINE   | 61416 NM_17741   | 330401 Tmcc1     | 3632431M    |
| chr2  | 1.44E+08 | 1.44E+08 | exon (NM_exon (NM_    | 124 NM_02531     | 66044 Dtd1       | 0610006HC   |
| chr12 | 36239102 | 36239325 | Intergenic Intergenic | -19552 NM_01346  | 11622 Ahr        | Ah Ahh Af   |
| chr6  | 1.15E+08 | 1.15E+08 | intron (NM intron (NM | 27494 NM_17768   | 232334 Vgll4     | BC048841    |
| chr11 | 69749077 | 69749550 | promoter-1promoter-1  | -88 NM_01687     | 53422 Ybx2       | Msy2        |
| chr2  | 91012077 | 91012325 | intron (NM intron (NM | 7277 NM_00117    | 228355 Madd      | 9630059K2   |
| chr7  | 1.4E+08  | 1.4E+08  | promoter-1promoter-1  | -497 NM_21247    | 77938 Fam53b     | A930008G:   |
| chr3  | 1.3E+08  | 1.3E+08  | intron (NM intron (NM | 33448 NM_02577   | 66815 Ccdc109b   | 9030408N1   |
| chr1  | 82312727 | 82312875 | promoter-1promoter-1  | -353 NM_02977    | 76867 Rhbdd1     | 4930418PC   |
| chr3  | 32409527 | 32410100 | intron (NM CpG        | 299 NM_14451     | 67778 Zfp639     | 6230400O:   |
| chr7  | 71135602 | 71135725 | Intergenic Intergenic | -51862 NM_02136  | 50794 Klf13      | 0610043C1   |
| chr1  | 1.37E+08 | 1.37E+08 | intron (NM intron (NM | 1214 NM_00795    | 13924 Ptpv       | Esp OST C   |
| chr2  | 48861177 | 48861275 | intron (NM intron (NM | 56198 NM_02992   | 109241 Mbd5      | 9430004D1   |
| chr6  | 38483877 | 38484050 | promoter-1promoter-1  | -898 NM_02536    | 66117 1110001J0  | Fmc1        |
| chrX  | 11583952 | 11584075 | Intergenic CpG        | 73666 NM_17504   | 71458 Bcor       | 5830466J1   |
| chr4  | 1.26E+08 | 1.26E+08 | promoter-1promoter-1  | 14 NM_17555      | 269582 Clspn     | B130025EC   |
| chr18 | 10993627 | 10993925 | Intergenic Intergenic | -58732 NM_01025  | 14465 Gata6      | AA410133    |
| chr7  | 52308502 | 52308600 | promoter-1promoter-1  | -300 NM_17502    | 233210 Prr12     | 6720469B1   |
| chr1  | 1.08E+08 | 1.08E+08 | intron (NM intron (NM | 96355 NM_13382   | 98432 Phlpp1     | AI836256 I  |
| chr12 | 85028927 | 85029300 | promoter-1promoter-1  | -400 NM_00894    | 19164 Psen1      | Ad3h PS-1   |
| chr13 | 37711627 | 37711800 | Intergenic Intergenic | -206194 NM_02683 | 68750 Rreb1      | 1110037NC   |
| chr4  | 63071402 | 63071725 | Intergenic CpG        | -7084 NM_00104   | 100182 Akna      | AI597013 I  |
| chr16 | 27389027 | 27389200 | promoter-1promoter-1  | 71 NM_00128      | 67501 Ccdc50     | C3orf6      |
| chr15 | 66392477 | 66392625 | promoter-1promoter-1  | 57 NM_17251      | 213068 Tmem71    | AI661017 I  |
| chr1  | 66082677 | 66082800 | Intergenic (TAA)n Sin | 109642 NM_02701  | 12969 Crygf      | 3110001K1   |
| chr12 | 56921502 | 56921600 | intron (NM CpG        | 952 NM_01999     | 56784 Ralgapa1   | 2310003F2   |
| chr11 | 98779077 | 98779200 | intron (NM intron (NM | 9673 NM_01179    | 23834 Cdc6       | CDC18L      |
| chr2  | 1.34E+08 | 1.34E+08 | intron (NM intron (NM | 556 NM_02914     | 52837 Tmx4       | 2810417DC   |
| chr9  | 66195477 | 66195550 | Intergenic Intergenic | -2744 NM_14561   | 235439 Herc1     | 2810449H1   |
| chr8  | 1.14E+08 | 1.14E+08 | intron (NM intron (NM | 32922 NM_01180   | 23837 Cfdp1      | AA408409    |
| chr2  | 90383002 | 90383325 | intron (NML2c LINE L  | 37641 NM_00898   | 19271 Ptpvj      | AI450271 I  |
| chr12 | 88495402 | 88495775 | intron (NM MMERVK1    | -6736 NM_15341   | 217734 Pomt2     | A830009D:   |
| chr14 | 31508802 | 31509025 | Intergenic Intergenic | -19122 NM_01946  | 54650 Sfmbt1     | 4930442N:   |
| chr8  | 1.25E+08 | 1.25E+08 | intron (NM CpG        | 453 NM_00103     | 234839 Piezo1    | 9630020g2   |
| chr13 | 63916602 | 63917100 | intron (NM CpG        | 209 NM_02350     | 76251 Ercc6l2    | 0610007PC   |
| chr6  | 38331202 | 38331425 | promoter-1promoter-1  | -211 NM_15360    | 264134 Ttc26     | 9330141E2   |
| chr8  | 1.22E+08 | 1.22E+08 | intron (NM intron (NM | 9604 NM_02692    | 69047 Atp2c2     | 1810010GC   |
| chr4  | 1.36E+08 | 1.36E+08 | exon (NM_exon (NM_    | 554 NM_17773     | 242705 E2f2      | 9230110J1   |
| chr10 | 92951152 | 92951525 | promoter-1promoter-1  | -175 NM_01040    | 15109 Hal        | Hsd his hi: |
| chr10 | 80819202 | 80819350 | Intergenic Intergenic | -1039 NM_02865   | 73822 Mfsd12     | C19orf28 F  |
| chr8  | 1.08E+08 | 1.08E+08 | intron (NM intron (NM | -21856 NM_02746  | 70575 Gfod2      | 5730466C2   |
| chr2  | 1.15E+08 | 1.15E+08 | promoter-1promoter-1  | -676 NM_20726    | 399568 BC052040  | -           |
| chr2  | 6130977  | 6131275  | intron (NM intron (NM | 2914 NM_02420    | 67856 Echdc3     | 2310005D1   |
| chr2  | 29744477 | 29744775 | promoter-1promoter-1  | -614 NM_00117    | 18286 Odf2       | AI848335 I  |
| chr8  | 82785727 | 82785800 | Intergenic Intergenic | -203856 NM_02025 | 15245 Hhip       | Hhip1       |
| chr7  | 35098677 | 35098750 | Intergenic CpG        | -28085 NM_17274  | 233103 4931406P1 | AA553327    |
| chr16 | 25424252 | 25424325 | Intergenic Intergenic | 137385 NM_17516  | 71338 Tprg       | 5430420C1   |

|       |          |          |                       |         |           |        |            |            |
|-------|----------|----------|-----------------------|---------|-----------|--------|------------|------------|
| chr11 | 3188677  | 3188775  | promoter-1promoter-1  | -408    | NR_045108 | 56218  | Patz1      | 8430401L1  |
| chr2  | 51002452 | 51002525 | intron (NM intron (NM | 2143    | NM_02881  | 74194  | Rnd3       | 2610017M   |
| chr13 | 74346102 | 74346175 | promoter-1promoter-1  | 10      | NM_17733  | 211446 | Exoc3      | 28100500C  |
| chr1  | 95202402 | 95202650 | promoter-1promoter-1  | -79     | NM_17805  | 69821  | Mterf4     | 1810059A2  |
| chr9  | 21921402 | 21921800 | Intergenic CpG        | -2988   | NM_17077  | 66126  | Elof1      | 1110011K1  |
| chr16 | 18248752 | 18249225 | promoter-1promoter-1  | 12      | NM_00108  | 15547  | Trmt2a     | Htf9c      |
| chr7  | 29766777 | 29766875 | promoter-1promoter-1  | 81      | NM_00128  | 73830  | Eif3k      | 1200009C2  |
| chr4  | 1.02E+08 | 1.02E+08 | Intergenic Intergenic | 68903   | NM_00117  | 18578  | Pde4b      | Dpde4 R74  |
| chr11 | 97642677 | 97644175 | promoter-1promoter-1  | 327     | NM_02289  | 65019  | Rpl23      | 2810009AC  |
| chr2  | 1.53E+08 | 1.53E+08 | promoter-1promoter-1  | 393     | NM_01880  | 54711  | Plagl2     | AU018672   |
| chr3  | 27664852 | 27665275 | Intergenic Intergenic | -55702  | NM_17318  | 72007  | Fndc3b     | 16000190C  |
| chr3  | 89383152 | 89383375 | intron (NM intron (NM | 59177   | NM_08046  | 140493 | Kcnn3      | KCa2.3 SK3 |
| chr7  | 91031577 | 91031700 | exon (NM_ exon (NM_   | 1213    | NM_03070  | 80889  | Mesdc1     | AW061151   |
| chr7  | 26022427 | 26022625 | exon (NM_ exon (NM_   | 344     | NM_00103  | 606496 | Gsk3a      | 2700086HC  |
| chr5  | 65098777 | 65098925 | Intergenic Intergenic | -95911  | NM_00845  | 16599  | Klf3       | 9930027GC  |
| chr7  | 25240452 | 25240650 | Intergenic Intergenic | -6968   | NM_01111  | 18793  | Plaur      | Cd87 u-PA  |
| chr12 | 89494552 | 89494750 | intron (NM ORR1A2-in  | 18290   | NM_00101  | 435337 | Gm5662     | EG435337   |
| chr14 | 15427327 | 15427450 | Intergenic Intergenic | -108151 | NM_00103  | 218756 | Slc4a7     | E430014N1  |
| chr18 | 76414477 | 76414675 | intron (NM intron (NM | -6199   | NM_00125  | 17126  | Smad2      | 7120426M   |
| chr4  | 43572052 | 43572375 | intron (NM intron (NM | 3242    | NM_01160  | 21894  | Tln1       | Tln        |
| chr2  | 83564327 | 83564425 | promoter-1promoter-1  | -178    | NM_00840  | 16410  | Itgav      | 1110004F1  |
| chr3  | 51458377 | 51458450 | Intergenic Intergenic | -6702   | NM_17499  | 211666 | Mgst2      | GST2 MGS   |
| chr14 | 98466777 | 98467075 | intron (NM intron (NM | 102058  | NM_00103  | 13134  | Dach1      | Dac Dach   |
| chr6  | 94450302 | 94450450 | promoter-1promoter-1  | 68      | NM_02625  | 67582  | Slc25a26   | 4930433D1  |
| chr8  | 86780927 | 86781350 | promoter-1promoter-1  | 85      | NM_02642  | 67873  | Mri1       | 2410018C2  |
| chr6  | 1.47E+08 | 1.47E+08 | intron (NM intron (NM | 588     | NM_02628  | 67623  | Tm7sf3     | 2010003B1  |
| chr9  | 57109927 | 57110175 | intron (NM CpG        | 355     | NM_02882  | 74211  | 1700017BC  | AA682102   |
| chr4  | 1.41E+08 | 1.41E+08 | intron (NM intron (NM | 1323    | NR_102344 | 213491 | Szrd1      | 111002210: |
| chr9  | 57335702 | 57336000 | Intergenic Intergenic | -16058  | NM_13398  | 102614 | Rpp25      | AI851155   |
| chr6  | 1.14E+08 | 1.14E+08 | intron (NM intron (NM | 74594   | NM_00103  | 11941  | Atp2b2     | D6Abb2e C  |
| chr10 | 94372102 | 94372225 | intron (NM intron (NM | 35049   | NM_01879  | 54712  | Plxnc1     | 2510048K1  |
| chr4  | 1.51E+08 | 1.51E+08 | promoter-1promoter-1  | -198    | NM_00115  | 74035  | Nol9       | 4632412124 |
| chr9  | 55889777 | 55890325 | intron (NM CpG        | 399     | NM_01199  | 26611  | Rcn2       | AA408742   |
| chr15 | 59384077 | 59384250 | intron (NM intron (NM | -96046  | NM_14454  | 211770 | Trib1      | A5300900:  |
| chr3  | 1.05E+08 | 1.05E+08 | Intergenic Intergenic | 190751  | NM_02922  | 75269  | 4930564DC- |            |
| chr2  | 32092002 | 32092300 | promoter-1promoter-1  | -52     | NM_14514  | 99011  | Pomt1      | AI505244   |
| chr5  | 92512427 | 92512750 | promoter-1promoter-1  | -5      | NM_00108  | 23881  | G3bp2      | AA409541   |
| chr1  | 1.73E+08 | 1.73E+08 | Intergenic Intergenic | -18741  | NM_00108  | 75472  | 1700009P1  | AV282292   |
| chr3  | 30730852 | 30731500 | Intergenic RLTR16 LT  | -23696  | NM_00113  | 71862  | Gpr160     | 1700025D1  |
| chr7  | 1.05E+08 | 1.05E+08 | intron (NM intron (NM | 427     | NM_01103  | 18479  | Pak1       | AW045634   |
| chr7  | 16829477 | 16829750 | promoter-1promoter-1  | -110    | NM_17691  | 319430 | C5ar2      | C5L2 E030  |
| chr3  | 1.05E+08 | 1.05E+08 | exon (NM_ exon (NM_   | 197     | NM_00861  | 17454  | Mov10      | C77703 M   |
| chrX  | 83073252 | 83073650 | Intergenic Intergenic | -42161  | NM_00116  | 71398  | 54304270:- |            |
| chr6  | 1.45E+08 | 1.45E+08 | intron (NM ID_B1 SINf | 46344   | NM_00102  | 12035  | Bcat1      | BCATc Eca  |
| chr15 | 55424952 | 55425075 | intron (NM intron (NM | 36050   | NM_00116  | 105837 | Mtbp       | AI429604   |
| chr10 | 96224277 | 96224475 | Intergenic Intergenic | 144741  | NM_00756  | 12226  | Btg1       | AI426953 , |
| chr2  | 24043777 | 24043925 | intron (NM intron (NM | 1855    | NM_15351  | 215257 | Il1f9      | Il36g      |

|       |          |          |                       |         |           |        |          |            |
|-------|----------|----------|-----------------------|---------|-----------|--------|----------|------------|
| chr2  | 1.26E+08 | 1.26E+08 | promoter-1promoter-1  | 180     | NM_00993  | 12848  | Cops2    | AI315723   |
| chr11 | 8902477  | 8902575  | intron (NM            | 8614    | NM_00831  | 15574  | Hus1     | mHus1      |
| chr1  | 88338427 | 88339050 | Intergenic CpG        | 15834   | NM_02796  | 71863  | 17000190 | -          |
| chr2  | 24287677 | 24287850 | intron (NMLTR81B LT   | 43356   | NM_01104  | 18510  | Pax8     | Pax-8      |
| chr18 | 56229777 | 56230050 | Intergenic Intergenic | -361873 | NM_02624  | 107022 | Gramd3   | 9030613F0  |
| chr12 | 74145152 | 74145300 | intron (NM            | 2473    | NM_00918  | 20471  | Six1     | BB138287   |
| chr12 | 34114527 | 34114750 | exon (NM_             | 149     | NM_17225  | 28071  | Twistnb  | 2410173G1  |
| chr13 | 40413152 | 40413400 | Intergenic Intergenic | -29896  | NM_17214  | 218165 | Ofcc1    | opo        |
| chr4  | 1.35E+08 | 1.35E+08 | Intergenic Intergenic | -1109   | NM_00113  | 51796  | Srrm1    | AA407769   |
| chr19 | 5693052  | 5693125  | intron (NM            | 3957    | NM_02201  | 26403  | Map3k11  | 2610017K1  |
| chr11 | 1.06E+08 | 1.06E+08 | 5' UTR (NM            | 148     | NM_00113  | 83796  | Smarcd2  | AW322457   |
| chr4  | 1.32E+08 | 1.32E+08 | promoter-1promoter-1  | -460    | NM_00116  | 230789 | Fam76a   | -          |
| chr6  | 66486552 | 66486700 | intron (NMB1_Mur2     | 1164    | NM_01949  | 56150  | Mad2l1   | AA673185   |
| chr10 | 79723477 | 79723600 | exon (NM_             | 175     | NM_01025  | 14431  | Gamt     | AA571402   |
| chr12 | 88142177 | 88142300 | Intergenic Intergenic | 66919   | NM_00119  | 627607 | Lrrc74   | EG627607   |
| chr2  | 25316077 | 25316450 | intron (NM            | 351     | NM_15355  | 227622 | BC029214 | D930050G:  |
| chr2  | 1.49E+08 | 1.49E+08 | Intergenic Intergenic | -85797  | NM_02140  | 58214  | Cst10    | DD72       |
| chr14 | 71165377 | 71165550 | intron (NM            | 972     | NM_02304  | 65246  | Xpo7     | 4930506CC  |
| chr5  | 90923577 | 90923650 | intron (NMLx8 LINE L  | 3873    | NM_00742  | 11576  | Afp      | -          |
| chr14 | 58416652 | 58416725 | promoter-1promoter-1  | -338    | NM_00911  | 20220  | Sap18    | C530046KC  |
| chr4  | 1.34E+08 | 1.34E+08 | intron (NM            | 998     | NM_02366  | 27981  | Rsrp1    | 2700043I2: |
| chr1  | 39560127 | 39560375 | Intergenic Intergenic | -24659  | NM_01877  | 54610  | Tbc1d8   | AD3 HBLP:  |
| chr9  | 13553352 | 13553525 | promoter-1promoter-1  | -187    | NM_02385  | 77116  | Mtmr2    | 6030445P1  |
| chr6  | 1.23E+08 | 1.23E+08 | promoter-1promoter-1  | 1       | NM_01081  | 17474  | Clec4d   | Clecsf8 M  |
| chr1  | 1.88E+08 | 1.88E+08 | Intergenic Intergenic | 197420  | NM_00936  | 21808  | Tgfb2    | BB105277   |
| chr9  | 59334477 | 59334625 | promoter-1promoter-1  | -370    | NM_01992  | 23806  | Arih1    | AU021774   |
| chr5  | 89081777 | 89081975 | Intergenic MTC LTR I  | 22729   | NM_00109  | 231413 | Grsf1    | BB232551   |
| chr2  | 62484077 | 62484400 | promoter-1promoter-1  | 74      | NM_02783  | 71586  | Ifih1    | 9130009C2  |
| chr4  | 1.21E+08 | 1.21E+08 | Intergenic Intergenic | -6774   | NM_13371  | 69780  | Smamp2   | 1810031KC  |
| chrX  | 1.54E+08 | 1.54E+08 | exon (NM_             | 196     | NM_17230  | 270669 | Mbtps2   | 9630032G2  |
| chr11 | 63322227 | 63322400 | Intergenic LTR33A LT  | 377301  | NM_00888  | 18858  | Pmp22    | 22kDa Gas  |
| chr11 | 1.18E+08 | 1.18E+08 | intron (NM            | 898     | NM_19802  | 217351 | Tnrc6c   | 9930033H1  |
| chr15 | 1.02E+08 | 1.02E+08 | intron (NM            | 372     | NM_14562  | 75705  | Eif4b    | 2310046H1  |
| chr6  | 49168102 | 49168200 | Intergenic CpG        | -3198   | NM_02367  | 140488 | Igf2bp3  | 2610101N1  |
| chr2  | 3574302  | 3574400  | Intergenic ORR1E LTF  | -56379  | NM_02562  | 66540  | Fam107b  | 3110001A1  |
| chr2  | 1.12E+08 | 1.12E+08 | Intergenic Intergenic | -6144   | NM_13374  | 73024  | Emc7     | 2900064A1  |
| chr1  | 14586252 | 14586375 | Intergenic Lx6 LINE L | 159734  | NM_01082  | 17681  | Msc      | MyoR bHL   |
| chr17 | 70883527 | 70884200 | intron (NML1M2 LINE   | 12413   | NM_00112  | 224997 | Dlgap1   | 4933422O1  |
| chr6  | 28065527 | 28065825 | intron (NM            | 18693   | NM_00817  | 14823  | Grm8     | A230002O(  |
| chr3  | 51684627 | 51684950 | intron (NM            | 219673  | NM_17499  | 211666 | Mgst2    | GST2 MGS   |
| chr13 | 13621327 | 13621775 | Intergenic Intergenic | -61125  | NM_01074  | 17101  | Lyst     | D13Sfk13   |
| chr2  | 62544377 | 62544700 | intron (NM            | 42154   | NM_14552  | 227960 | Gca      | 5133401E0  |
| chr5  | 73965127 | 73965300 | Intergenic LTR40c LTI | 58447   | NM_15356  | 231296 | Lrrc66   | -          |
| chr13 | 59368302 | 59368475 | Intergenic Intergenic | 277424  | NM_00128  | 67269  | Agtppb1  | 1700020N1  |
| chr7  | 97591652 | 97591750 | non-coding non-coding | 410     | NR_073438 | 233490 | Crebzf   | 1110034C1  |
| chr2  | 92886002 | 92886075 | intron (NM            | 263     | NM_00117  | 1E+08  | Prdm11   | 8030443DC  |
| chr10 | 1.18E+08 | 1.18E+08 | Intergenic Intergenic | -56492  | NM_00116  | 17245  | Mdm1     | Arrd2 Mdr  |

|       |          |          |                       |         |          |        |           |             |
|-------|----------|----------|-----------------------|---------|----------|--------|-----------|-------------|
| chr2  | 3391652  | 3391900  | intron (NM CpG        | 482     | NM_02272 | 64707  | Suv39h2   | 4930507K2   |
| chr8  | 1.27E+08 | 1.27E+08 | intron (NM intron (NM | 42177   | NM_02370 | 73647  | Capn9     | 2200003B1   |
| chr15 | 73253552 | 73253825 | promoter-1promoter-1  | -67     | NM_00113 | 14083  | Ptk2      | FAK FRNK    |
| chr9  | 36950952 | 36951025 | intron (NM intron (NM | 3919    | NM_14895 | 208076 | Pknx2     | D230005H:   |
| chr1  | 60399952 | 60400300 | promoter-1promoter-1  | -90     | NM_03001 | 77951  | Cyp20a1   | A930011N:   |
| chr11 | 74584652 | 74584975 | intron (NM intron (NM | 448     | NM_02619 | 67493  | Mettl16   | 2610100DC   |
| chr7  | 25669527 | 25669800 | promoter-1promoter-1  | -70     | NM_02313 | 20085  | Rps19     | Dsk3        |
| chrX  | 1.48E+08 | 1.48E+08 | intron (NM intron (NM | 1237    | NM_01676 | 15108  | Hsd17b10  | 17bHSD10    |
| chr15 | 52544077 | 52544350 | exon (NM_exon (NM_    | 213     | NM_02721 | 69790  | Med30     | 1810038NC   |
| chr5  | 1.44E+08 | 1.44E+08 | intron (NM CpG        | 588     | NM_17272 | 231868 | E130309DC | A630028N:   |
| chr7  | 50801252 | 50801700 | Intergenic L1MA9 LIN  | -12935  | NM_02129 | 12489  | Cd33      | Siglec-3 gp |
| chr4  | 1.32E+08 | 1.32E+08 | Intergenic Intergenic | -3567   | NM_14490 | 230784 | Sesn2     | HI95 SEST:  |
| chr18 | 37966252 | 37966375 | exon (NM_exon (NM_    | 249     | NM_03358 | 93706  | Pcdhgc3   | PC43 Pcdh   |
| chr11 | 59041352 | 59041600 | 5' UTR (NM 5' UTR (NM | 188     | NM_00113 | 11840  | Arf1      | -           |
| chr19 | 32943702 | 32943850 | Intergenic Intergenic | 111709  | NM_00896 | 19211  | Pten      | 2310035OC   |
| chr8  | 26126727 | 26126950 | promoter-1promoter-1  | 556     | NM_00127 | 11502  | Adam9     | AU020942    |
| chr6  | 1.17E+08 | 1.17E+08 | Intergenic Intergenic | -8112   | NM_17876 | 319776 | Tmem72    | C230095GC   |
| chr16 | 33951002 | 33951375 | Intergenic Intergenic | 15901   | NM_00947 | 22247  | Umps      | 1700095D2   |
| chr10 | 1.21E+08 | 1.21E+08 | intron (NM intron (NM | 9705    | NM_02936 | 75612  | Gns       | 2610016K1   |
| chr2  | 1.19E+08 | 1.19E+08 | exon (NM_exon (NM_    | 335     | NM_17226 | 228545 | Vps18     | 9930024E1   |
| chr11 | 1.18E+08 | 1.18E+08 | intron (NM intron (NM | 532     | NM_00103 | 72344  | Usp36     | 2700002L0   |
| chr7  | 13535227 | 13535325 | Intergenic Intergenic | -15937  | NM_17873 | 243834 | Zfp324    | A930002M    |
| chr5  | 1E+08    | 1E+08    | promoter-1promoter-1  | 103     | NM_01669 | 50926  | Hnrnpdl   | AA407431    |
| chr17 | 28828227 | 28828325 | promoter-1promoter-1  | -11     | NM_00116 | 26416  | Mapk14    | CSBP2 Crk   |
| chr9  | 88332052 | 88332150 | intron (NM B2_Mm2 S   | 1688    | NM_17292 | 244962 | Snx14     | B830022K1   |
| chr4  | 3866102  | 3866500  | promoter-1promoter-1  | 266     | NM_00128 | 66433  | Chchd7    | 1810049H2   |
| chr2  | 60748752 | 60749100 | intron (NM intron (NM | -29431  | NM_00114 | 56878  | Rbms1     | 2600014B1   |
| chr4  | 4720252  | 4720450  | 5' UTR (NM 5' UTR (NM | 102     | NM_17773 | 242291 | Impad1    | 1110001C2   |
| chr12 | 39506002 | 39506100 | promoter-1promoter-1  | -794    | NM_00796 | 14009  | Etv1      | ER81 Etsrp  |
| chr2  | 91486302 | 91486575 | exon (NM_exon (NM_    | 3510    | NM_00103 | 381410 | Zfp408    | Gm1011      |
| chr5  | 1.39E+08 | 1.39E+08 | promoter-1promoter-1  | -47     | NM_00108 | 66096  | Lamtor4   | 0910001L0   |
| chr4  | 44313902 | 44313975 | 5' UTR (NM 5' UTR (NM | 149     | NM_01079 | 17279  | Melk      | AI327312 i  |
| chr8  | 60280052 | 60280300 | intron (NM intron (NM | -148324 | NM_14473 | 108150 | Galnt7    | AI225872    |
| chr4  | 1.29E+08 | 1.29E+08 | promoter-1promoter-1  | -140    | NM_00846 | 16650  | Kpna6     | IPOA7 Kpn   |
| chr8  | 74222302 | 74222650 | intron (NM intron (NM | 3223    | NM_02818 | 72297  | B3gnt3    | 2210008L1   |
| chr7  | 30092452 | 30092675 | intron (NM intron (NM | 3539    | NM_01387 | 29861  | Dpf1      | Neud4       |
| chr6  | 1.25E+08 | 1.25E+08 | Intergenic Intergenic | -48679  | NM_19860 | 213522 | Plekhg6   | BC026778    |
| chr11 | 1.06E+08 | 1.06E+08 | intron (NM intron (NM | 705     | NM_02600 | 67163  | Ccdc47    | 2610204L2   |
| chr8  | 74739727 | 74739875 | Intergenic Intergenic | -3065   | NM_00108 | 234421 | Cib3      | C730014M    |
| chr6  | 1.38E+08 | 1.38E+08 | intron (NM RMER15 L   | 4024    | NM_17778 | 277898 | Slc15a5   | 9830102E0   |
| chr1  | 1.71E+08 | 1.71E+08 | Intergenic Intergenic | 365332  | NM_02328 | 66977  | Nuf2      | 2410003CC   |
| chr3  | 9020152  | 9020500  | Intergenic Intergenic | -15811  | NM_00102 | 21985  | Tpd52     | AI043038 i  |
| chr19 | 14671602 | 14671875 | intron (NM CpG        | 735     | NM_01160 | 21888  | Tle4      | 5730411M    |
| chr9  | 44773927 | 44774075 | promoter-1promoter-1  | -318    | NM_14540 | 140630 | Ube4a     | 4732444G1   |
| chr1  | 1.66E+08 | 1.66E+08 | intron (NM intron (NM | -5927   | NM_00797 | 14067  | F5        | AI173222 i  |
| chr11 | 23987127 | 23987375 | intron (NM intron (NM | 6556    | NM_00115 | 14025  | Bcl11a    | 2810047E1   |
| chr17 | 44914477 | 44914600 | intron (NM CpG        | 418     | NM_17865 | 109115 | Supt3     | 2310066G2   |



|       |          |          |                     |            |         |          |        |          |            |
|-------|----------|----------|---------------------|------------|---------|----------|--------|----------|------------|
| chr11 | 95524202 | 95524375 | Intergenic          | MTEb LTR   | -3983   | NM_00883 | 18673  | Phb      | Bap32      |
| chr11 | 76759102 | 76759175 | promoter-1          | promoter-1 | -20     | NM_17864 | 104184 | Blmh     | AI035728 I |
| chr18 | 44539552 | 44540025 | promoter-1          | promoter-1 | -366    | NM_02749 | 70640  | Dcp2     | 2410015D2  |
| chr1  | 87632027 | 87632100 | intron (NM          | intron (NM | 1118    | NM_17705 | 319997 | A630001G | -          |
| chr3  | 9516702  | 9516775  | intron (NM          | intron (NM | 93347   | NM_13321 | 170753 | Zfp704   | C030026M   |
| chr7  | 87706852 | 87707100 | Intergenic          | MER20 DN   | -26971  | NM_00104 | 12144  | Blm      | -          |
| chr2  | 1.04E+08 | 1.04E+08 | Intergenic          | Intergenic | -23501  | NM_00114 | 16909  | Lmo2     | Rbtn-2 Rbt |
| chr1  | 59539502 | 59539950 | 5' UTR (NM          | 5' UTR (NM | 735     | NM_00805 | 14369  | Fzd7     | Fz7        |
| chr11 | 9090752  | 9091100  | Intergenic          | Intergenic | -1019   | NM_17825 | 268379 | Abca13   | 9830132L2  |
| chr16 | 5029752  | 5029875  | intron (NM          | intron (NM | -16167  | NM_13318 | 66049  | Rogdi    | 0610011C1  |
| chr3  | 37318977 | 37319575 | promoter-1          | promoter-1 | 74      | NM_02134 | 57815  | Spata5   | 2510048F2  |
| chr8  | 1.29E+08 | 1.29E+08 | Intergenic          | Intergenic | 166933  | NM_02421 | 67952  | Tomm20   | 1810060KC  |
| chr4  | 1.45E+08 | 1.45E+08 | Intergenic          | Intergenic | -14740  | NM_01161 | 21938  | Tnfrsf1b | CD120b TN  |
| chr1  | 1.74E+08 | 1.74E+08 | intron (NM          | intron (NM | 1636    | NM_17859 | 21346  | Tagln2   | 2700094C1  |
| chr17 | 53828902 | 53829100 | promoter-1          | promoter-1 | -361    | NM_02823 | 72415  | Sgol1    | 3300001M   |
| chr10 | 80986902 | 80987025 | promoter-1          | promoter-1 | 7       | NM_01030 | 14676  | Gna15    | G[a]15 Gal |
| chr2  | 1.68E+08 | 1.68E+08 | promoter-1          | promoter-1 | 491     | NM_01007 | 13480  | Dpm1     | AI118379 I |
| chr9  | 1.07E+08 | 1.07E+08 | 5' UTR (NM          | 5' UTR (NM | 412     | NM_01970 | 56395  | Tmem115  | C78915 PI  |
| chr7  | 29171127 | 29171275 | 3' UTR (NM          | 3' UTR (NM | 6508    | NM_02604 | 67224  | Med29    | 2810405O2  |
| chr1  | 1.93E+08 | 1.93E+08 | promoter-1          | promoter-1 | 337     | NM_02976 | 76843  | Dtl      | 2810047L0  |
| chr9  | 55945527 | 55945625 | intron (NM          | intron (NM | 7793    | NM_01119 | 19200  | Pstpip1  | CD2BP1 de  |
| chr7  | 3616777  | 3616950  | TTS (NM_1           | TTS (NM_1  | 579     | NM_02720 | 69757  | Leng1    | 1500001K1  |
| chr2  | 92215652 | 92215775 | 5' UTR (NM          | 5' UTR (NM | 317     | NM_14512 | 18633  | Pex16    | -          |
| chr19 | 46414227 | 46414600 | Intergenic          | Intergenic | -1263   | NM_00116 | 67116  | Cuedc2   | 3010002GC  |
| chr16 | 22398877 | 22399075 | intron (NM          | intron (NM | 40667   | NM_02379 | 104156 | Etv5     | 1110005E0  |
| chr14 | 52639077 | 52639275 | 5' UTR (NM          | 5' UTR (NM | 212     | NM_00125 | 69890  | Zfp219   | 2010302A1  |
| chr1  | 1.46E+08 | 1.46E+08 | promoter-1          | promoter-1 | 63      | NM_14599 | 214498 | Cdc73    | 8430414L1  |
| chr19 | 34262352 | 34262750 | Intergenic          | Intergenic | -4209   | NM_02968 | 76630  | Stambpl1 | 1700095N2  |
| chr2  | 1.67E+08 | 1.67E+08 | Intergenic          | Intergenic | -18948  | NM_01983 | 56336  | B4galt5  | 943007810  |
| chr2  | 72059552 | 72060000 | intron (NM          | intron (NM | -63918  | NM_02305 | 65964  | Zak      | AV006891   |
| chr14 | 48750927 | 48751525 | intron (NM          | intron (NM | 10682   | NM_03360 | 93834  | Peli2    | AW047589   |
| chr8  | 1.25E+08 | 1.25E+08 | intron (NM          | intron (NM | -5186   | NM_00780 | 13057  | Cyba     | b558 nmf3  |
| chr6  | 1.49E+08 | 1.49E+08 | intron (NM          | intron (NM | 246     | NM_00111 | 232566 | Amn1     | 5830467E0  |
| chr6  | 40841102 | 40841225 | Intergenic          | Intergenic | -3670   | NM_13929 | 194357 | Moxd2    | Dbhl1      |
| chr5  | 1.39E+08 | 1.39E+08 | promoter-1          | promoter-1 | 664     | NM_00856 | 17220  | Mcm7     | AI747533 I |
| chr11 | 1.2E+08  | 1.2E+08  | Intergenic          | Intergenic | 11039   | NM_00108 | 208092 | Chmp6    | 2400004GC  |
| chr12 | 82147952 | 82148075 | intron (NM          | intron (NM | 20218   | NM_02231 | 64075  | Smoc1    | 2600002F2  |
| chr1  | 10222277 | 10222525 | intron (NM          | CpG        | 350     | NM_00110 | 211673 | Arfgef1  | ARFGEP1 E  |
| chr1  | 52290252 | 52290425 | promoter-1          | promoter-1 | -262    | NM_00111 | 14660  | Gls      | 6330442B1  |
| chr6  | 39728527 | 39728825 | Intergenic          | Intergenic | 32259   | NM_01027 | 14548  | Mrps33   | AI841153 I |
| chr1  | 1.3E+08  | 1.3E+08  | intron (NML1M4 LINE |            | 4469    | NM_00108 | 226413 | Lct      | Gm100 LA   |
| chr9  | 1.23E+08 | 1.23E+08 | intron (NM          | intron (NM | -17212  | NM_03069 | 83493  | Sacm1l   | SAC1 Sac1  |
| chr17 | 34091152 | 34093150 | promoter-1          | promoter-1 | 435     | NM_01129 | 20084  | Rps18    | H-2Ke3 H2  |
| chr2  | 1.67E+08 | 1.67E+08 | promoter-1          | promoter-1 | 96      | NM_02381 | 76367  | Trp53rk  | 2810408M   |
| chr2  | 1.68E+08 | 1.68E+08 | Intergenic          | Intergenic | -6751   | NM_01120 | 19246  | Ptpn1    | PTP-1B PTI |
| chr15 | 68547952 | 68548025 | Intergenic          | Intergenic | -210862 | NM_01015 | 13992  | Khdrbs3  | Etle SLM-2 |
| chr5  | 1.3E+08  | 1.3E+08  | promoter-1          | promoter-1 | -415    | NM_01036 | 110006 | Gusb     | AI747421 I |

|       |          |          |            |            |        |          |        |          |            |
|-------|----------|----------|------------|------------|--------|----------|--------|----------|------------|
| chr17 | 48463652 | 48463775 | 3' UTR (NM | 3' UTR (NM | 8226   | NM_17708 | 320148 | B430306N | (Trem16    |
| chr11 | 1.15E+08 | 1.15E+08 | Intergenic | Intergenic | 17758  | NM_17075 | 217303 | Cd300a   | B230315M   |
| chr6  | 90704977 | 90705150 | intron (NM | intron (NM | -38540 | NM_00113 | 232227 | lqsec1   | AW561907   |
| chr15 | 76731202 | 76731300 | exon (NM_  | exon (NM_  | 880    | NM_02553 | 66398  | CommD5   | 2310065HC  |
| chr12 | 8674502  | 8674600  | Intergenic | Intergenic | -6389  | NM_00116 | 80913  | Pum2     | 5730503J2  |
| chr9  | 85269027 | 85269100 | Intergenic | Intergenic | -48306 | NM_00116 | 212943 | Fam46a   | D930050G   |
| chr5  | 1.37E+08 | 1.37E+08 | Intergenic | Intergenic | -9013  | NM_01196 | 26433  | Plod3    | AI414586 I |
| chr7  | 1.49E+08 | 1.49E+08 | promoter-1 | promoter-1 | -249   | NM_00874 | 18218  | Dusp8    | 5530400BC  |
| chr6  | 39155202 | 39155275 | intron (NM | intron (NM | 1534   | NM_00103 | 338523 | Kdm7a    | A630082K2  |
| chr12 | 86831127 | 86831550 | Intergenic | Intergenic | 16487  | NM_01023 | 14281  | Fos      | D12Rfj1 c- |
| chr19 | 41344577 | 41344700 | Intergenic | ID2 SINE I | -6144  | NM_13335 | 107358 | Tm9sf3   | 1810073M   |
| chr3  | 1.08E+08 | 1.08E+08 | intron (NM | intron (NM | 14419  | NM_01997 | 20661  | Sort1    | 2900053A1  |
| chr1  | 1.93E+08 | 1.93E+08 | Intergenic | Intergenic | -42051 | NM_00749 | 11910  | Atf3     | LRG-21     |
| chr4  | 1.36E+08 | 1.36E+08 | promoter-1 | promoter-1 | 44     | NM_00127 | 74326  | Hnrnp    | 2610003J0  |
| chr4  | 59818752 | 59818850 | 5' UTR (NM | 5' UTR (NM | 279    | NM_17246 | 209131 | Snx30    | 4732481H1  |
| chr1  | 63527027 | 63527100 | intron (NM | intron (NM | 34585  | NM_01178 | 23792  | Adam23   | AW046396   |
| chr14 | 79132127 | 79132250 | Intergenic | CpG        | -7292  | NM_00108 | 380921 | Dgkh     | 5930402BC  |
| chr2  | 35098502 | 35098825 | Intergenic | RMER4B L   | -13216 | NM_00120 | 227753 | Gsn      | ADF        |
| chr5  | 1.46E+08 | 1.46E+08 | intron (NM | intron (NM | 21261  | NM_02943 | 75788  | Smurf1   | 4930431E1  |
| chr1  | 74708377 | 74708550 | 5' UTR (NM | 5' UTR (NM | 135    | NM_00101 | 67534  | Ttll4    | 4632407PC  |
| chr16 | 18643702 | 18643775 | Intergenic | Intergenic | -13707 | NM_21361 | 18951  | 5-Sep    | Cdcrel-1 C |
| chr8  | 1.12E+08 | 1.12E+08 | intron (NM | CpG        | 201    | NM_00108 | 52335  | Atxn1l   | AW558552   |
| chr6  | 1.19E+08 | 1.19E+08 | intron (NM | CpG        | 28488  | NM_19798 | 68465  | Adipor2  | 111000111  |
| chr11 | 68780877 | 68781050 | promoter-1 | promoter-1 | -670   | NM_02804 | 71998  | Slc25a35 | 1810012H1  |
| chr15 | 3587102  | 3587275  | Intergenic | Intergenic | -53836 | NM_01028 | 14600  | Ghr      | GHBP GHR   |
| chr4  | 34833952 | 34834175 | Intergenic | CpG        | -3866  | NM_01388 | 30046  | Zfp292   | 5730450DC  |
| chr11 | 1.16E+08 | 1.16E+08 | intron (NM | intron (NM | 6878   | NM_00116 | 217344 | Rhbdf2   | 473246511  |
| chr10 | 10072027 | 10072325 | intron (NM | intron (NM | 119936 | NM_00112 | 215772 | Adgb     | 9130014G2  |
| chr19 | 5511152  | 5511275  | promoter-1 | promoter-1 | -724   | NM_00102 | 225861 | Snx32    | B930037P1  |
| chr15 | 77662552 | 77662625 | intron (NM | intron (NM | 10017  | NM_02241 | 17886  | Myh9     | Fltn Myhn  |
| chr14 | 75347502 | 75347575 | 5' UTR (NM | 5' UTR (NM | 146    | NM_00125 | 380916 | Lrch1    | 4832412D1  |
| chr5  | 91360427 | 91360550 | intron (NM | GC_rich Lc | 266    | NM_02678 | 665563 | Mthfd2l  | 1110019K2  |
| chr13 | 42148502 | 42148600 | intron (NM | intron (NM | 1161   | NM_00777 | 110521 | Hivep1   | Cryabp1    |
| chr18 | 52946052 | 52946225 | intron (NM | intron (NM | 18340  | NM_00119 | 67847  | Sncaip   | 2810407O1  |
| chr3  | 1.54E+08 | 1.54E+08 | promoter-1 | promoter-1 | -196   | NR_02809 | 19352  | Rabggtb  | -          |
| chr4  | 93002277 | 93002625 | promoter-1 | promoter-1 | -249   | NM_02695 | 69136  | Tusc1    | 2200001D1  |
| chr11 | 70469202 | 70469500 | Intergenic | CpG-2168   | -1199  | NM_01107 | 18643  | Pfn1     | Pfn        |
| chr3  | 60408227 | 60408300 | intron (NM | intron (NM | 103089 | NM_00125 | 56758  | Mbnl1    | Mbnl mKI/  |
| chr7  | 1.26E+08 | 1.26E+08 | intron (NM | MER3 DNA   | -24349 | NM_00994 | 12850  | Coq7     | clk-1      |
| chr1  | 88424627 | 88424950 | intron (NM | CpG-365    | 1477   | NM_00897 | 19231  | Ptma     | Thym       |
| chr6  | 83003527 | 83003725 | exon (NM_  | exon (NM_  | 939    | NM_01975 | 64704  | Htra2    | AI481710   |
| chr5  | 1.36E+08 | 1.36E+08 | exon (NM_  | exon (NM_  | 152    | NM_14600 | 215160 | Rhbdd2   | 0610011L1  |
| chr1  | 78484977 | 78485050 | intron (NM | intron (NM | 459    | NR_10275 | 23874  | Farsb    | C76708 Fa  |
| chr4  | 1.32E+08 | 1.32E+08 | intron (NM | intron (NM | 1816   | NM_00103 | 230787 | Themis2  | ICB-1      |
| chr1  | 1.73E+08 | 1.73E+08 | promoter-1 | promoter-1 | 39     | NM_00948 | 22278  | Usf1     | bHLHb11    |
| chr12 | 70285602 | 70285800 | promoter-1 | promoter-1 | 556    | NM_14603 | 217664 | Mgat2    | AA407964   |
| chr2  | 1.67E+08 | 1.67E+08 | intron (NM | intron (NM | -11377 | NM_17075 | 263876 | Spata2   | AI504642 i |

|       |          |          |             |            |         |           |        |           |           |
|-------|----------|----------|-------------|------------|---------|-----------|--------|-----------|-----------|
| chr3  | 1.27E+08 | 1.27E+08 | promoter-1  | promoter-1 | 129     | NM_13859  | 28036  | Larp7     | C330027G  |
| chr11 | 4847202  | 4847400  | promoter-1  | promoter-1 | -223    | NM_00124  | 11764  | Ap1b1     | Adbt1 b2b |
| chr5  | 3802452  | 3802700  | promoter-1  | promoter-1 | 548     | NM_00128  | 70797  | Ankib1    | 2310061P2 |
| chr15 | 76755902 | 76755975 | promoter-1  | promoter-1 | -60     | NM_00116  | 239546 | Zfp647    | 6030449J2 |
| chr14 | 62207177 | 62207275 | Intergenic  | Lx7 LINE L | -9837   | NM_00116  | 66597  | Trim13    | 3110001L1 |
| chr3  | 1.43E+08 | 1.43E+08 | 5' UTR (NM  | 5' UTR (NM | 205     | NM_17865  | 109333 | Pkn2      | 6030436C2 |
| chr17 | 64581002 | 64581250 | Intergenic  | Intergenic | 100097  | NM_14485  | 224938 | Pja2      | AI447901  |
| chr13 | 23623277 | 23623450 | TTS (NM_1   | TTS (NM_1  | 450     | NM_15317  | 69386  | Hist1h4h  | 1700024HC |
| chr13 | 21253402 | 21253600 | Intergenic  | Intergenic | -18299  | NM_00905  | 19720  | Trim27    | AW538890  |
| chr9  | 16390302 | 16390375 | Intergenic  | Intergenic | -207663 | NM_00108  | 270120 | Fat3      | 9430076AC |
| chr5  | 1.35E+08 | 1.35E+08 | intron (NM  | intron (NM | 22994   | NM_00108  | 57080  | Gtf2ird1  | 1700012P1 |
| chr10 | 62706577 | 62706775 | 5' UTR (NM  | 5' UTR (NM | 131     | NM_02610  | 67345  | Herc4     | 1700056O1 |
| chr18 | 65590077 | 65590150 | promoter-1  | promoter-1 | -538    | NM_17283  | 240354 | Malt1     | A630046N1 |
| chr6  | 1.21E+08 | 1.21E+08 | intron (NM  | intron (NM | 1165    | NM_15351  | 94044  | Bcl2l13   | BCL-RAMB1 |
| chr13 | 40818627 | 40818850 | intron (NM  | CpG-3771   | 7074    | NM_00112  | 21418  | Tfap2a    | AP-2 AP2a |
| chr2  | 27569777 | 27569975 | intron (NM  | intron (NM | 3773    | NM_00129  | 20181  | Rxra      | 9530071D1 |
| chr9  | 42122477 | 42122775 | Intergenic  | L1ME3B LI  | -50243  | NM_17276  | 235293 | Sc5d      | A830037KC |
| chr6  | 49333427 | 49333650 | intron (NM  | intron (NM | -12065  | NM_02991  | 77485  | Stk31     | C330007K2 |
| chr5  | 1.36E+08 | 1.36E+08 | intron (NM  | intron (NM | 684     | NM_00974  | 12054  | Bcl7b     | -         |
| chr9  | 79640902 | 79641050 | promoter-1  | promoter-1 | 261     | NM_13371  | 69981  | Tmem30a   | 2010200I2 |
| chr8  | 19784627 | 19785000 | Intergenic  | CpG        | 55237   | NM_00103  | 626415 | 4930467E2 | ENSMUSGC  |
| chr1  | 1.33E+08 | 1.33E+08 | exon (NM_   | exon (NM_  | 372     | NM_17869  | 226418 | Yod1      | 9930028C2 |
| chr9  | 70390727 | 70390850 | exon (NM_   | exon (NM_  | 111     | NM_02569  | 66660  | Sltm      | 5730455CC |
| chr12 | 83028802 | 83029000 | intron (NM  | intron (NM | 67884   | NM_01881  | 54604  | Pcnx      | 2900024E2 |
| chr2  | 1.04E+08 | 1.04E+08 | intron (NM  | intron (NM | 456     | NM_15312  | 98956  | Nat10     | AI429152  |
| chr16 | 20756202 | 20756350 | Intergenic  | RCHARR1    | -21692  | NM_00937  | 21832  | Thpo      | Mgdf MI M |
| chr4  | 57968377 | 57969775 | exon (NM_   | exon (NM_  | 207     | NM_01166  | 22166  | Txn1      | ADF AW55  |
| chr13 | 36748527 | 36748675 | Intergenic  | Intergenic | 77745   | NM_15352  | 68404  | Nrn1      | 0710008J2 |
| chr16 | 22857927 | 22858075 | promoter-1  | promoter-1 | 83      | NM_00119  | 67838  | Dnajb11   | 1810031F2 |
| chr10 | 1.12E+08 | 1.12E+08 | Intergenic  | Intergenic | -25706  | NM_17827  | 353025 | Caps2     | D630005BC |
| chr11 | 1.2E+08  | 1.2E+08  | promoter-1  | promoter-1 | -122    | NM_00103  | 192173 | Fam195b   | -         |
| chr7  | 28115552 | 28115675 | intron (NM  | intron (NM | 3054    | NM_00111  | 108075 | Ltbp4     | 2310046A1 |
| chr15 | 93171027 | 93171550 | Intergenic  | Intergenic | -3922   | NM_02418  | 67057  | Yaf2      | 2810021M  |
| chr15 | 31297077 | 31297150 | exon (NM_   | exon (NM_  | 401     | NM_00116  | 67434  | Ankrd33b  | 0610012AC |
| chr13 | 51836152 | 51836550 | intron (NM  | intron (NM | 52765   | NM_00128  | 20354  | Sema4d    | CD100 Ser |
| chr12 | 96695677 | 96696100 | Intergenic  | Intergenic | -234548 | NM_20151  | 399558 | Flrt2     | -         |
| chr11 | 72020627 | 72020825 | promoter-1  | promoter-1 | -330    | NM_02655  | 52700  | Txndc17   | 4831443O2 |
| chr17 | 47733802 | 47734075 | intron (NM  | intron (NM | 3522    | NM_00763  | 12445  | Ccnd3     | 9230106BC |
| chr1  | 1.93E+08 | 1.93E+08 | intron (NR_ | CpG        | 392     | NR_037575 | 52477  | Angel2    | 2610307I2 |
| chr4  | 1.19E+08 | 1.19E+08 | promoter-1  | promoter-1 | -295    | NM_01173  | 22608  | Ybx1      | 1700102N1 |
| chr12 | 42290777 | 42291000 | intron (NM  | intron (NM | -78244  | NM_01073  | 16981  | Lrrn3     | NLRR-3    |
| chr11 | 34596677 | 34596825 | intron (NM  | intron (NM | 656     | NM_03337  | 94176  | Dock2     | AI662014  |
| chr11 | 52065877 | 52066075 | TTS (NM_0   | TTS (NM_0  | 20479   | NM_01154  | 21402  | Skp1a     | 15kDa 261 |
| chr11 | 32442677 | 32442800 | intron (NM  | intron (NM | 9472    | NM_00928  | 20868  | Stk10     | Gek1 Lok  |
| chr1  | 1.8E+08  | 1.8E+08  | exon (NM_   | exon (NM_  | 177     | NM_00742  | 11566  | Adss      | AI314886  |
| chr7  | 34981277 | 34981625 | exon (NM_   | exon (NM_  | 215     | NM_02654  | 68079  | Pdcd2l    | 6030457N1 |
| chr10 | 41991202 | 41991375 | intron (NM  | intron (NM | 5260    | NM_01974  | 56484  | Foxo3     | 1110048B1 |

|       |          |          |                       |         |          |        |           |             |
|-------|----------|----------|-----------------------|---------|----------|--------|-----------|-------------|
| chr16 | 20672527 | 20673425 | intron (NM CpG        | 154     | NM_00100 | 208643 | Eif4g1    | E030015G2   |
| chr4  | 53726677 | 53727175 | promoter-1promoter-1  | -128    | NM_13930 | 246179 | Fktn      | D8300300:   |
| chr2  | 66018052 | 66018175 | Intergenic Intergenic | -55263  | NM_01573 | 14425  | Galnt3    | -           |
| chr11 | 83942802 | 83943025 | intron (NM intron (NM | 157     | NM_17256 | 217031 | Tada2a    | AV319371    |
| chr13 | 46792352 | 46792425 | intron (NMRMER20B     | 27497   | NM_00103 | 97863  | C78339    | -           |
| chr4  | 33118552 | 33118700 | promoter-1promoter-1  | 226     | NM_01958 | 56228  | Ube2j1    | 0710008M    |
| chrX  | 1.34E+08 | 1.34E+08 | intron (NM CpG        | 153     | NM_00108 | 67062  | Slc25a53  | 2310046F1   |
| chr16 | 16573627 | 16573700 | Intergenic L1_Mus3 L  | -13374  | NM_13923 | 224014 | Fgd4      | 9030023J0   |
| chr5  | 24728677 | 24728925 | promoter-1promoter-1  | 90      | NM_14490 | 231050 | Galnt11   | A430075I0   |
| chr4  | 1.56E+08 | 1.56E+08 | Intergenic CpG        | -1622   | NM_19830 | 231003 | Klhl17    | AL022703    |
| chr19 | 4120977  | 4121500  | intron (NM intron (NM | 337     | NM_00127 | 11632  | Aip       | AA408703    |
| chr10 | 1.26E+08 | 1.26E+08 | Intergenic B1_Mur1 S  | 73451   | NM_02685 | 68876  | Xrcc6bp1  | 1110068E0   |
| chr6  | 1.29E+08 | 1.29E+08 | Intergenic Intergenic | -19295  | NM_05310 | 93694  | Clec2d    | Clr-b Clrb  |
| chr1  | 1.73E+08 | 1.73E+08 | intron (NM intron (NM | 21150   | NM_17706 | 320078 | Olfml2b   | 1110018N0   |
| chr8  | 82163877 | 82164175 | intron (NM CpG        | 451     | NM_00108 | 73945  | Otud4     | 4930431L1   |
| chr4  | 1.18E+08 | 1.18E+08 | exon (NM exon (NM_    | -9475   | NM_00116 | 20441  | St3gal3   | ST3GalIII S |
| chr5  | 1.11E+08 | 1.11E+08 | promoter-1promoter-1  | -47     | NM_00125 | 71782  | Ankle2    | 1110001J1   |
| chr14 | 22003202 | 22003275 | intron (NMLx6 LINE L  | 107864  | NM_00124 | 11534  | Adk       | 2310026J0   |
| chr3  | 42212902 | 42213175 | Intergenic Intergenic | 666498  | NM_02727 | 73852  | D3Ertd751 | 2810009O1   |
| chr18 | 10646652 | 10646825 | intron (NM intron (NM | 28944   | NM_00922 | 20641  | Snrpd1    | AA407109    |
| chr8  | 27099502 | 27099600 | intron (NM intron (NM | 5042    | NM_02903 | 74653  | Pomk      | 4930444AC   |
| chr15 | 99494802 | 99495225 | Intergenic Intergenic | -6136   | NM_00959 | 11419  | Asic1     | AI843610 ,  |
| chr10 | 67268577 | 67268850 | Intergenic Intergenic | 106697  | NM_17867 | 216049 | Zfp365    | AI839779 ,  |
| chr5  | 1.16E+08 | 1.16E+08 | intron (NM intron (NM | 8723    | NM_00770 | 12704  | Cit       | C030025P1   |
| chr19 | 32560327 | 32560525 | 5' UTR (NV 5' UTR (NV | 167     | NM_01079 | 17330  | Minpp1    | AA408516    |
| chr10 | 57252027 | 57252275 | intron (NM CpG        | 184     | NM_01976 | 56442  | Serinc1   | 1500011D1   |
| chr10 | 13273052 | 13273125 | promoter-1promoter-1  | -140    | NM_00116 | 56535  | Pex3      | 1700014F1   |
| chr2  | 30107102 | 30107275 | intron (NM intron (NM | 13899   | NM_17772 | 241296 | Lrrc8a    | Lrrc8 mKIA  |
| chr4  | 1.49E+08 | 1.49E+08 | intron (NM intron (NM | 10940   | NM_00108 | 110208 | Pgd       | 0610042AC   |
| chr18 | 75229752 | 75229975 | intron (NM intron (NM | 51437   | NM_02772 | 69190  | Dym       | 1810041M    |
| chr16 | 23675902 | 23676050 | Intergenic Intergenic | 65971   | NM_02338 | 67775  | Rtp4      | 5830458K1   |
| chr17 | 3114227  | 3114350  | promoter-1promoter-1  | -684    | NM_13412 | 106583 | Scaf8     | A630086M    |
| chr6  | 53017852 | 53018000 | intron (NM GC_rich Lc | 692     | NM_17340 | 231986 | Jazf1     | AI591476 c  |
| chr2  | 1.3E+08  | 1.3E+08  | promoter-1promoter-1  | -338    | NM_00898 | 19262  | Ptpa      | Ptpa Ptpal  |
| chr17 | 26078777 | 26078850 | TTS (NM_0 TTS (NM_0   | 121     | NM_00129 | 14755  | Pigq      | Gpi1 Gpi1f  |
| chr10 | 81022202 | 81022325 | promoter-1promoter-1  | 74      | NM_00127 | 14797  | Aes       | AL024115    |
| chr9  | 57612527 | 57612925 | intron (NM CpG        | 941     | NM_00771 | 102414 | Clk3      | AI256811    |
| chr6  | 38303227 | 38303325 | intron (NM intron (NM | 1327    | NM_02886 | 78781  | Zc3hav1   | 1200014N1   |
| chr15 | 76161652 | 76161825 | promoter-1promoter-1  | 14      | NM_01033 | 14731  | Gpaa1     | C80044 m    |
| chr7  | 1.34E+08 | 1.34E+08 | promoter-1promoter-1  | 23      | NM_17736 | 244216 | Zfp771    | G630024CC   |
| chr12 | 85616127 | 85616550 | Intergenic RMER19B    | -9908   | NM_02988 | 77219  | Ptgr2     | 1810016I2   |
| chr1  | 1.82E+08 | 1.82E+08 | Intergenic Intergenic | -32795  | NM_00112 | 19165  | Psen2     | ALG-3 Ad4   |
| chr13 | 97441427 | 97441625 | promoter-1promoter-1  | -635    | NM_00825 | 15357  | Hmgcr     | HMG-CoAR    |
| chr3  | 1.38E+08 | 1.38E+08 | intron (NM GC_rich Lc | 412     | NM_00103 | 70604  | Dnajb14   | 5730496F1   |
| chr8  | 90885552 | 90885850 | intron (NM CpG        | 389     | NM_01204 | 26992  | Brd7      | BP75 CELT   |
| chrX  | 10659327 | 10659450 | Intergenic MIRb SINE  | -216995 | NM_00111 | 1E+08  | Gm14483   | OTTMUSGC    |
| chr3  | 1E+08    | 1E+08    | Intergenic Intergenic | -13573  | NM_00114 | 74645  | Fam46c    | 4930431BC   |

|       |          |          |            |            |         |           |        |           |             |
|-------|----------|----------|------------|------------|---------|-----------|--------|-----------|-------------|
| chr5  | 1.23E+08 | 1.23E+08 | Intergenic | Intergenic | -45329  | NR_027838 | 11938  | Atp2a2    | 9530097L1   |
| chr2  | 70542727 | 70542875 | Intergenic | Intergenic | 43235   | NM_02735  | 70231  | Gorasp2   | 0610011AC   |
| chr17 | 46419327 | 46419400 | 5' UTR (NM | 5' UTR (NM | 612     | NM_00125  | 74094  | Tjap1     | 0610041D1   |
| chr11 | 9569552  | 9569675  | intron (NM | intron (NM | 477668  | NM_17825  | 268379 | Abca13    | 9830132L2   |
| chr10 | 1.17E+08 | 1.17E+08 | 5' UTR (NM | 5' UTR (NM | 187     | NM_02657  | 64050  | Yeats4    | 4930573H1   |
| chr6  | 16837702 | 16837850 | intron (NM | intron (NM | 10665   | NM_03119  | 21426  | Tfec      | BB107417    |
| chr7  | 54065802 | 54065925 | intron (NM | Lx8 LINE L | 13822   | NM_00129  | 14884  | Gtf2h1    | 62kDa AW    |
| chr1  | 1.84E+08 | 1.84E+08 | 5' UTR (NM | 5' UTR (NM | 203     | NM_17337  | 209456 | Trp53bp2  | 53BP2 AI7   |
| chr10 | 1.11E+08 | 1.11E+08 | Intergenic | Intergenic | 33996   | NM_00934  | 21664  | Phlda1    | DT1P1B11    |
| chr19 | 5388902  | 5389075  | promoter-1 | promoter-1 | -285    | NM_01688  | 20227  | Sart1     | U5-110K     |
| chr18 | 33459277 | 33459475 | Intergenic | Intergenic | -85906  | NM_13377  | 170459 | Stard4    | 4632419C1   |
| chr17 | 28572102 | 28572175 | intron (NM | intron (NM | 50956   | NM_01022  | 14229  | Fkbp5     | D17Ert59    |
| chr1  | 55145152 | 55145425 | promoter-1 | promoter-1 | 296     | NM_00830  | 15528  | Hspe1     | 10kDa Hsp   |
| chr14 | 1.06E+08 | 1.06E+08 | intron (NM | intron (NM | 42048   | NM_00119  | 76273  | Ndfip2    | 0710001O2   |
| chr1  | 71460077 | 71460175 | intron (NM | intron (NM | 1358    | NM_17521  | 74591  | Abca12    | 4832428G1   |
| chr4  | 1.25E+08 | 1.25E+08 | Intergenic | Intergenic | -114813 | NM_15315  | 230738 | Zc3h12a   | BC036563    |
| chr12 | 55292227 | 55292450 | intron (NM | intron (NM | 12523   | NM_02813  | 112407 | Egln3     | 2610021G0   |
| chr1  | 1.09E+08 | 1.09E+08 | promoter-1 | promoter-1 | -24     | NM_00919  | 20479  | Vps4b     | 8030489C1   |
| chr1  | 87960677 | 87961150 | promoter-1 | promoter-1 | -281    | NM_02735  | 70247  | Psmd1     | 2410026J1   |
| chr13 | 75962702 | 75963050 | Intergenic | Intergenic | -14458  | NM_05310  | 93692  | Glrx      | C86710 D1   |
| chr12 | 86939802 | 86940050 | promoter-1 | promoter-1 | -129    | NM_00120  | 81703  | Jdp2      | Jundm2 Ju   |
| chr3  | 1.16E+08 | 1.16E+08 | Intergenic | Intergenic | -11801  | NM_00117  | 229776 | Cdc14a    | A830059A1   |
| chr3  | 95117352 | 95117525 | Intergenic | Intergenic | -1736   | NM_02978  | 76893  | Cers2     | 061001311   |
| chr5  | 1.51E+08 | 1.51E+08 | promoter-1 | promoter-1 | -963    | NM_13389  | 100637 | N4bp211   | 2410024N1   |
| chr16 | 57391577 | 57391750 | intron (NM | LSU-rRNA_  | 38273   | NM_00104  | 78749  | Filip1l   | 4631422O0   |
| chr12 | 81744602 | 81744700 | promoter-1 | promoter-1 | 197     | NM_00795  | 13877  | Erh       | Mer Prei1   |
| chr5  | 73648652 | 73648725 | promoter-1 | promoter-1 | -831    | NM_02819  | 72313  | Fryl      | 2010313D2   |
| chr2  | 24790302 | 24790475 | intron (NR | CpG        | 413     | NR_027876 | 215705 | Arrrdc1   | AI957342    |
| chr2  | 1.3E+08  | 1.3E+08  | intron (NM | CpG        | 112     | NM_19817  | 380601 | Fastkd5   | C78212 ml   |
| chr3  | 80313327 | 80313450 | Intergenic | Intergenic | 293325  | NM_01354  | 14800  | Gria2     | GluA2 Glu   |
| chr6  | 1.24E+08 | 1.24E+08 | Intergenic | Intergenic | -13886  | NM_15350  | 232370 | Clstn3    | CSTN3 Cs3   |
| chr11 | 23671277 | 23671375 | promoter-1 | promoter-1 | -356    | NM_00904  | 19696  | Rel       | c-Rel       |
| chr3  | 51279702 | 51279925 | TTS (NM_0  | TTS (NM_0  | -8075   | NM_01685  | 19338  | Rab33b    | -           |
| chr5  | 86507752 | 86507975 | intron (NM | MIR SINE   | 7010    | NM_01999  | 56792  | Stap1     | AI586015    |
| chr12 | 1.04E+08 | 1.04E+08 | promoter-1 | promoter-1 | 68      | NM_17714  | 320351 | Tmem251   | D230037D0   |
| chr6  | 72850302 | 72850500 | promoter-1 | promoter-1 | -428    | NM_01971  | 74287  | Kcmf1     | 1700094M    |
| chr3  | 1.09E+08 | 1.09E+08 | intron (NM | intron (NM | 21412   | NM_02050  | 57257  | Vav3      | A530094I0   |
| chrX  | 20265452 | 20265525 | promoter-1 | promoter-1 | -131    | NM_01104  | 18555  | Cdk16     | Crk5 Pctair |
| chr17 | 24488377 | 24488450 | promoter-1 | promoter-1 | -555    | NM_01385  | 27410  | Abca3     | 1810036E2   |
| chr3  | 79336727 | 79336800 | intron (NM | intron (NM | 34838   | NM_00116  | 329679 | Fnip2     | D630023B1   |
| chr5  | 1.41E+08 | 1.41E+08 | intron (NM | intron (NM | 25207   | NM_17340  | 231842 | Amz1      | 5330426I0   |
| chr2  | 64958227 | 64958450 | intron (NM | intron (NM | -97515  | NM_01671  | 50915  | Grb14     | AI505286    |
| chr19 | 43599727 | 43599800 | promoter-1 | promoter-1 | -668    | NM_01032  | 14718  | Got1      | AI789014 0  |
| chr14 | 68545977 | 68546250 | intron (NM | intron (NM | 5516    | NM_17778  | 68813  | Dock5     | 1110060D0   |
| chr5  | 1.24E+08 | 1.24E+08 | promoter-1 | promoter-1 | 79      | NM_00103  | 330189 | Tmem120k- | -           |
| chr1  | 1.82E+08 | 1.82E+08 | intron (NM | CpG        | 182     | NM_00741  | 11545  | Parp1     | 5830444G2   |
| chr1  | 36614327 | 36614575 | intron (NM | CpG        | 775     | NM_00112  | 20353  | Sema4c    | AI426163 !  |

|       |          |          |            |             |         |          |        |          |             |
|-------|----------|----------|------------|-------------|---------|----------|--------|----------|-------------|
| chr14 | 28628802 | 28629075 | intron (NM | intron (NM  | 193310  | NM_17781 | 238988 | Erc2     | 6430531DC   |
| chr11 | 53704702 | 53704925 | exon (NM_  | exon (NM_   | 392     | NM_01139 | 20520  | Slc22a5  | Lstpl Octn: |
| chr13 | 1.14E+08 | 1.14E+08 | exon (NM_  | exon (NM_   | 334     | NM_13079 | 170625 | Snx18    | Snag1       |
| chr6  | 67133677 | 67133825 | Intergenic | Intergenic  | -83222  | NM_00111 | 66870  | Serbp1   | 1200009K1   |
| chr13 | 42145427 | 42145500 | Intergenic | Intergenic  | -1927   | NM_00777 | 110521 | Hivep1   | Cryabp1     |
| chr5  | 34915952 | 34916125 | promoter-1 | promoter-1  | -325    | NM_01345 | 11518  | Add1     | AI256389    |
| chr2  | 1.28E+08 | 1.28E+08 | intron (NM | intron (NM  | 9477    | NM_00128 | 12125  | Bcl2l11  | 1500006F2   |
| chr6  | 72389027 | 72389525 | non-coding | non-coding  | 276     | NM_14556 | 232087 | Mat2a    | D630045P1   |
| chr15 | 5297027  | 5297200  | Intergenic | Intergenic  | -102926 | NM_00896 | 19219  | Ptger4   | EP4 Ptgerc  |
| chr8  | 1.08E+08 | 1.08E+08 | promoter-1 | promoter-1  | -708    | NM_02653 | 68051  | Nutf2    | 270006710:  |
| chr9  | 48414427 | 48414525 | Intergenic | Intergenic  | -1294   | NM_01092 | 18113  | Nnmt     | -           |
| chr4  | 67061277 | 67061475 | Intergenic | Intergenic  | 572531  | NM_02129 | 21898  | Tlr4     | Lps Ly87 F  |
| chr16 | 48993427 | 48993700 | promoter-1 | promoter-1  | 662     | NM_00111 | 224170 | Dzip3    | 2310047CC   |
| chr2  | 1.63E+08 | 1.63E+08 | Intergenic | Intergenic  | 18188   | NM_02951 | 76080  | Ttpal    | 3110080AC   |
| chr7  | 52147777 | 52148000 | promoter-1 | promoter-1  | -152    | NM_02936 | 75613  | Med25    | 2610034E1   |
| chr7  | 26948352 | 26948450 | Intergenic | Intergenic  | -10027  | NM_01000 | 13094  | Cyp2b9   | Cyp2b       |
| chr1  | 43155152 | 43155825 | promoter-1 | promoter-1  | -21     | NM_00101 | 73122  | Tgfbra1  | 3110018K1   |
| chr11 | 1.1E+08  | 1.1E+08  | promoter-1 | promoter-1  | -712    | NM_02188 | 19084  | Prkar1a  | 1300018C2   |
| chr7  | 20058377 | 20058500 | Intergenic | B1F SINE    | -14595  | NM_17227 | 232944 | Mark4    | 2410090P2   |
| chr2  | 90929302 | 90929475 | Intergenic | Intergenic  | -7566   | NM_01135 | 20375  | Spi1     | Dis-1 Dis1  |
| chr2  | 74663777 | 74663875 | promoter-1 | promoter-1  | -43     | NM_01680 | 53375  | Mtx2     | 1500012GC   |
| chr10 | 1.21E+08 | 1.21E+08 | TTS (NM_0  | TTS (NM_0   | 312     | NM_01978 | 56480  | Tbk1     | 1200008BC   |
| chr5  | 1.31E+08 | 1.31E+08 | intron (NM | intron (NM  | 14233   | NM_02785 | 71667  | Tmem248  | 0610007L0   |
| chr14 | 12607802 | 12607975 | intron (NM | intron (NM  | 221821  | NM_00898 | 19270  | Ptprg    | 5430405N1   |
| chr10 | 67749577 | 67749650 | Intergenic | Intergenic  | -8139   | NM_02359 | 71371  | Arid5b   | 4930580B1   |
| chr12 | 76882802 | 76883350 | Intergenic | Intergenic  | -36229  | NM_00100 | 319565 | Syne2    | 6820443OC   |
| chr9  | 60207852 | 60208125 | intron (NM | intron (NM  | 150854  | NM_00104 | 207596 | Thsd4    | ADAMTSL-1   |
| chr5  | 44218177 | 44218675 | intron (NM | intron (NM  | 8294    | NM_00976 | 12182  | Bst1     | 114/A10 A   |
| chrX  | 72627827 | 72628000 | intron (NM | intron (NM  | 175     | NM_02612 | 67391  | Fundc2   | 4833415N2   |
| chr1  | 1.73E+08 | 1.73E+08 | Intergenic | Intergenic  | -11030  | NM_02317 | 80915  | Dusp12   | 1190004O1   |
| chr3  | 1.02E+08 | 1.02E+08 | intron (NM | intron (NM  | 1163    | NM_00103 | 242126 | Slc22a15 | 2610034P2   |
| chr3  | 1.03E+08 | 1.03E+08 | Intergenic | CT-rich Lov | -21464  | NM_00116 | 22094  | Tshb     | -           |
| chr10 | 20866577 | 20866775 | intron (NM | (T)n Simpl  | 14114   | NM_00119 | 17863  | Myb      | AI550390 I  |
| chr6  | 43616002 | 43616400 | promoter-1 | promoter-1  | -27     | NM_01386 | 29807  | Tpk1     | -           |
| chr9  | 1.09E+08 | 1.09E+08 | promoter-1 | promoter-1  | -561    | NM_00892 | 19087  | Prkar2a  | 1110061A2   |
| chr6  | 1.13E+08 | 1.13E+08 | Intergenic | MIRb SINE   | -85861  | NM_00108 | 18430  | Oxtr     | OTR         |
| chr7  | 1.49E+08 | 1.49E+08 | promoter-1 | promoter-1  | 398     | NM_01687 | 54006  | Deaf1    | AU042387    |
| chr5  | 1.04E+08 | 1.04E+08 | intron (NM | intron (NM  | 10859   | NM_00108 | 17355  | Aff1     | 9630032BC   |
| chr2  | 71174502 | 71174675 | intron (NM | intron (NM  | 31023   | NM_17243 | 78830  | Slc25a12 | 2610002DC   |
| chr6  | 88396602 | 88396750 | promoter-1 | promoter-1  | -143    | NM_02306 | 65967  | Eefsec   | Selb sec    |
| chr4  | 1.47E+08 | 1.47E+08 | promoter-1 | promoter-1  | 27      | NM_01084 | 17769  | Mthfr    | AI323986    |
| chr10 | 80760977 | 80761200 | intron (NM | intron (NM  | 5380    | NM_00114 | 18717  | Pip5k1c  | AI115456 ,  |
| chr4  | 6381502  | 6381600  | promoter-1 | promoter-1  | -133    | NM_01094 | 18201  | Nsmf     | AA959567    |
| chr9  | 70132427 | 70132575 | intron (NM | intron (NM  | 77344   | NM_18107 | 71602  | Myo1e    | 2310020N2   |
| chr7  | 1.52E+08 | 1.52E+08 | Intergenic | Intergenic  | -89883  | NM_00763 | 12443  | Ccnd1    | AI327039 ,  |
| chr1  | 82722027 | 82722150 | intron (NM | intron (NM  | 595     | NM_02940 | 75734  | Mff      | 5230400G2   |
| chr18 | 39098952 | 39099250 | intron (NM | L1MB3 LIN   | -20748  | NM_01019 | 14164  | Fgf1     | Dffrx Fam   |

|       |          |          |                        |         |           |        |          |            |
|-------|----------|----------|------------------------|---------|-----------|--------|----------|------------|
| chr9  | 1.19E+08 | 1.19E+08 | intron (NR_PB1D10 SI   | 11766   | NM_00129  | 18799  | Plcd1    | AW212592   |
| chr8  | 1.14E+08 | 1.14E+08 | intron (NM intron (NM  | 485     | NM_00791  | 13680  | Ddx19a   | DBP5 Ddx1  |
| chr5  | 1.49E+08 | 1.49E+08 | Intergenic Intergenic  | -24624  | NM_01190  | 24109  | Ubl3     | AW108023   |
| chr1  | 1.57E+08 | 1.57E+08 | Intergenic Intergenic  | 24590   | NM_01050  | 15939  | Ier5     | -          |
| chr9  | 20297952 | 20298225 | promoter-1promoter-1   | -898    | NM_00111  | 235028 | Zfp426   | 2900057CC  |
| chr4  | 1.33E+08 | 1.33E+08 | intron (NM intron (NM  | 2553    | NM_01020  | 14191  | Fgr      | -          |
| chr17 | 44834252 | 44834350 | intron (NR_intron (NR_ | 38824   | NR_073425 | 12393  | Runx2    | AML3 Cbf   |
| chr2  | 1.19E+08 | 1.19E+08 | Intergenic Intergenic  | -31048  | NM_02657  | 68142  | Ino80    | 2310079N1  |
| chr9  | 41724952 | 41725350 | Intergenic Intergenic  | 207221  | NM_01143  | 20660  | Sorl1    | 2900010L1  |
| chr10 | 79017627 | 79017800 | intron (NM CpG         | 123     | NM_02742  | 70427  | Mier2    | 2700087H1  |
| chr4  | 1.34E+08 | 1.34E+08 | 3' UTR (NM 3' UTR (NM  | -1383   | NM_08055  | 73723  | Sh3bgrl3 | 1110004L0  |
| chr1  | 65159452 | 65159875 | intron (NM intron (NM  | -9726   | NM_00777  | 12964  | Cryga    | Cryg-4 DGC |
| chr8  | 12393652 | 12393725 | intron (NR_intron (NR_ | -1831   | NM_00923  | 20664  | Sox1     | BB176347   |
| chr2  | 1.56E+08 | 1.56E+08 | promoter-1promoter-1   | 44      | NM_02594  | 67067  | Romo1    | 201010001  |
| chr1  | 13650327 | 13650450 | intron (NM CpG         | 202     | NM_14538  | 212442 | Lactb2   | Cgi-83 E43 |
| chr11 | 88017352 | 88017525 | promoter-1promoter-1   | -452    | NM_02417  | 64656  | Mrps23   | D11Bwg11.  |
| chr1  | 52111652 | 52112000 | intron (NM intron (NM  | 46738   | NM_01148  | 20849  | Stat4    | -          |
| chr6  | 88851927 | 88852125 | promoter-1promoter-1   | -219    | NM_01190  | 24100  | Tpra1    | 40kDa Gpr  |
| chr3  | 1.06E+08 | 1.06E+08 | promoter-1promoter-1   | -156    | NM_13386  | 99712  | Cept1    | 9930118KC  |
| chr11 | 88921552 | 88921825 | promoter-1promoter-1   | 374     | NM_01950  | 56077  | Dgke     | C87606 D/  |
| chr6  | 86559227 | 86559450 | Intergenic RSINE1 SIN  | -18830  | NM_02641  | 67855  | Asprv1   | 2300003P2  |
| chr2  | 3341002  | 3341125  | promoter-1promoter-1   | -340    | NM_14611  | 227525 | Dclre1c  | 9930121L0  |
| chr9  | 40383277 | 40383400 | Intergenic Intergenic  | -110709 | NM_13373  | 71566  | Clmp     | 9030425E1  |
| chr17 | 27974227 | 27974475 | Intergenic B1F2 SINE   | -2681   | NM_01143  | 20630  | Snrpc    | Snrp1c U1  |
| chr6  | 85873002 | 85873150 | intron (NM intron (NM  | 7363    | NM_00117  | 69786  | Tprkb    | 0610033G2  |
| chr6  | 1.09E+08 | 1.09E+08 | intron (NR_intron (NR_ | -2110   | NM_01149  | 20893  | Bhlhe40  | Bhlhb2 C1. |
| chr7  | 26793127 | 26793450 | Intergenic IAP-d-int L | -53226  | NM_00781  | 13089  | Cyp2b13  | -          |
| chr19 | 3768252  | 3768400  | 5' UTR (NV 5' UTR (NV  | 905     | NM_00116  | 225888 | Suv420h1 | AA117471   |
| chr12 | 72415552 | 72415750 | intron (NM intron (NM  | 4780    | NM_00119  | 59036  | Dact1    | 4921528D1  |
| chr7  | 1.38E+08 | 1.38E+08 | promoter-1promoter-1   | -743    | NM_00127  | 11907  | Ate1     | AI225793 , |
| chr17 | 28445427 | 28445825 | Intergenic Intergenic  | -4849   | NR_028297 | 72775  | Fance    | 2810451DC  |
| chr8  | 17401902 | 17402100 | intron (NM intron (NM  | 133384  | NM_05317  | 94109  | Csmd1    | B930082HC  |
| chr1  | 1.34E+08 | 1.34E+08 | intron (NM intron (NM  | 1086    | NM_00119  | 74137  | Nuak2    | 1200013B2  |
| chr6  | 85245952 | 85246150 | intron (NM intron (NM  | 37365   | NM_17863  | 94282  | Sfxn5    | C230001HC  |
| chr1  | 74274027 | 74274100 | Intergenic Intergenic  | -9061   | NM_02971  | 76709  | Arcp2    | 2210023NC  |
| chr1  | 6205127  | 6205325  | intron (NM CpG         | 483     | NM_00982  | 12421  | Rb1cc1   | 2900055E0  |
| chr4  | 45419652 | 45419750 | intron (NM intron (NM  | 1937    | NM_00100  | 230125 | Slc25a51 | 9130208E0  |
| chr2  | 1.26E+08 | 1.26E+08 | intron (NM intron (NM  | 23676   | NM_00108  | 241633 | Atp8b4   | A530043E1  |
| chr5  | 1.38E+08 | 1.38E+08 | promoter-1promoter-1   | -724    | NM_00110  | 83701  | Srrt     | 2810019GC  |
| chr13 | 65342577 | 65342775 | Intergenic CpG         | -35652  | NM_17529  | 97895  | Nlrp4f   | C330026NC  |
| chr12 | 1.04E+08 | 1.04E+08 | promoter-1promoter-1   | 269     | NM_00119  | 27277  | Golga5   | Ret-ll     |
| chr19 | 36993552 | 36993800 | exon (NM_exon (NM_     | 413     | NM_02826  | 72514  | Fgfbp3   | 2610306H1  |
| chr6  | 95668302 | 95668400 | intron (NM CpG         | 489     | NM_01150  | 20917  | Suclg2   | AF171077   |
| chr6  | 87492052 | 87492250 | Intergenic Intergenic  | -8898   | NM_00128  | 232201 | Arhgap25 | A130039I2  |
| chr1  | 45943652 | 45943800 | Intergenic MIRb SINE   | 38713   | NM_01691  | 53945  | Slc40a1  | Dusg Fpn1  |
| chr10 | 10168852 | 10169325 | intron (NM intron (NM  | 23024   | NM_00112  | 215772 | Adgb     | 9130014G2  |
| chr8  | 1.07E+08 | 1.07E+08 | Intergenic Intergenic  | 12058   | NM_19799  | 72361  | Ces2g    | 2210023GC  |

|       |          |          |            |   |            |         |          |        |           |            |
|-------|----------|----------|------------|---|------------|---------|----------|--------|-----------|------------|
| chr7  | 71039402 | 71039475 | intron (NM | R | SINE1 SIN  | -22305  | NM_00125 | 381994 | E030018B1 | Gm1697     |
| chr18 | 55074402 | 55074600 | intron (NM | M | TD LTR I   | 75333   | NM_17575 | 269023 | Zfp608    | 4932417D1  |
| chr3  | 40985102 | 40985225 | Intergenic |   | Intergenic | -98195  | NM_02755 | 70804  | Pgrmc2    | 4631434O1  |
| chr1  | 98762577 | 98763000 | intron (NM |   | intron (NM | 5960    | NM_17265 | 227394 | Slco4c1   | 9530051F0  |
| chr5  | 1.22E+08 | 1.22E+08 | intron (NM |   | intron (NM | 920     | NM_00965 | 11669  | Aldh2     | Ahd-5 Ahd  |
| chr12 | 88173027 | 88173150 | Intergenic |   | Intergenic | 52676   | NM_14583 | 238330 | Irf2bpl   | 6430527G1  |
| chr11 | 87284377 | 87284550 | intron (NM |   | CpG        | 43370   | NM_00119 | 83560  | Tex14     | C85585     |
| chr10 | 39044127 | 39044425 | Intergenic |   | Intergenic | -45329  | NM_00112 | 14360  | Fyn       | AI448320 , |
| chr13 | 63052927 | 63053150 | Intergenic |   | Intergenic | -13215  | NM_00128 | 72061  | 20101110: | 2300006M   |
| chr8  | 3660952  | 3661075  | Intergenic |   | RMER1B C   | -4749   | NM_02698 | 69189  | Mcemp1    | 1810033B1  |
| chr14 | 51417502 | 51417600 | Intergenic |   | PB1D9 SIN  | -2148   | NM_00111 | 239083 | Ccnb1ip1  | Gm288 He   |
| chr15 | 74539727 | 74539825 | promoter-1 |   | promoter-1 | -24     | NM_00841 | 16469  | Jrk       | -          |
| chr7  | 1.34E+08 | 1.34E+08 | promoter-1 |   | promoter-1 | 77      | NM_14620 | 233890 | Zfp768    | BC026432   |
| chr10 | 85484802 | 85485050 | intron (NM |   | CpG        | 252     | NM_15319 | 69754  | Fbxo7     | 2410015K2  |
| chr1  | 84403452 | 84403800 | intron (NM |   | intron (NM | -122406 | NM_00100 | 98496  | Pid1      | 5033414KC  |
| chr13 | 6633927  | 6634050  | intron (NM |   | intron (NM | 14029   | NM_01970 | 56421  | Pfkip     | 1200015H2  |
| chr8  | 87211302 | 87211925 | 5' UTR (NV |   | 5' UTR (NV | 148     | NM_02578 | 66830  | Nacc1     | 2010001HC  |
| chr1  | 30775302 | 30775775 | Intergenic |   | Intergenic | 144563  | NM_00108 | 213109 | Phf3      | 2310061N1  |
| chr6  | 1.29E+08 | 1.29E+08 | Intergenic |   | Intergenic | -17480  | NM_03059 | 80782  | Klrb1b    | Klrb1d Ly5 |
| chr2  | 27330927 | 27331125 | promoter-1 |   | promoter-1 | -108    | NM_02333 | 67382  | Brd3      | 2410084F2  |
| chr11 | 59919252 | 59919450 | intron (NM |   | CpG        | 836     | NM_00902 | 19377  | Rai1      | Gt1        |
| chr5  | 36068777 | 36068900 | intron (NM |   | intron (NM | 3087    | NM_19434 | 231147 | Sh3tc1    | 4631428G1  |
| chr5  | 32655427 | 32655500 | promoter-1 |   | promoter-1 | -490    | NM_17214 | 665270 | Plb1      | 4632413E2  |
| chr2  | 1.27E+08 | 1.27E+08 | 5' UTR (NV |   | 5' UTR (NV | 136     | NM_13930 | 99138  | Stard7    | AI852671 , |
| chr11 | 1.02E+08 | 1.02E+08 | Intergenic |   | Intergenic | -1516   | NM_01155 | 21429  | Ubtf      | A930005G(  |
| chr16 | 65726077 | 65726325 | Intergenic |   | Lx8 LINE L | -89677  | NM_02857 | 73569  | Vgll3     | 1700110N1  |
| chr10 | 62486102 | 62486250 | intron (NM |   | CpG        | 421     | NM_00107 | 432467 | Hnrnph3   | AA693301   |
| chr7  | 1.5E+08  | 1.5E+08  | intron (NM |   | intron (NM | -4735   | NM_02028 | 56844  | Tssc4     | AA241958   |
| chr9  | 1.06E+08 | 1.06E+08 | promoter-1 |   | promoter-1 | 123     | NM_14562 | 27966  | Rrp9      | 55kDa D19  |
| chr6  | 17231202 | 17231350 | promoter-1 |   | promoter-1 | 91      | NM_01690 | 12390  | Cav2      | AI447843   |
| chr17 | 32924702 | 32924775 | intron (NM |   | intron (NM | 494     | NM_17245 | 208292 | Zfp871    | 4732483N1  |
| chr5  | 1.09E+08 | 1.09E+08 | promoter-1 |   | promoter-1 | -340    | NM_02610 | 13486  | Dr1       | 1700121L0  |
| chr2  | 79972977 | 79973100 | Intergenic |   | Intergenic | -3469   | NM_00115 | 18573  | Pde1a     | AI987702 , |
| chr2  | 35095602 | 35095725 | Intergenic |   | Intergenic | -16216  | NM_00120 | 227753 | Gsn       | ADF        |
| chr7  | 1.49E+08 | 1.49E+08 | promoter-1 |   | promoter-1 | -2      | NM_00128 | 54006  | Deaf1     | AU042387   |
| chr3  | 90486252 | 90486375 | Intergenic |   | Intergenic | 13320   | NM_01365 | 20201  | S100a8    | 60B8Ag AI  |
| chr10 | 44249302 | 44249500 | Intergenic |   | CpG        | -70908  | NM_00754 | 12142  | Prdm1     | Blimp-1 Bl |
| chr14 | 65881002 | 65881375 | 5' UTR (NV |   | 5' UTR (NV | 112     | NM_02145 | 14365  | Fzd3      | AU020229   |
| chr9  | 1.11E+08 | 1.11E+08 | intron (NM |   | intron (NM | 773     | NM_01746 | 54199  | Ccrl2     | 181004710! |
| chr5  | 1.36E+08 | 1.36E+08 | exon (NM_  |   | exon (NM_  | 135     | NM_02537 | 66138  | Wbscr22   | 1110003N2  |
| chr2  | 25356627 | 25356700 | promoter-1 |   | promoter-1 | 365     | NM_01390 | 30839  | Fbxw5     | AI159739   |
| chr17 | 48007452 | 48007700 | intron (NM |   | intron (NM | -35936  | NM_00110 | 17240  | Mdfi      | I-mf I-mfa |
| chr10 | 70812102 | 70812275 | intron (NM |   | intron (NM | 1647    | NM_02718 | 69718  | Ipmk      | 2410017C1  |
| chr7  | 73692527 | 73692625 | Intergenic |   | B1_Mur3 S  | -120213 | NM_05308 | 56847  | Aldh1a3   | ALDH6 RAI  |
| chr19 | 9004252  | 9004400  | promoter-1 |   | promoter-1 | 142     | NM_14487 | 225898 | Eml3      | BC022146   |
| chr9  | 15161702 | 15161825 | intron (NM |   | ID_B1 SIN  | 469     | NM_17697 | 319675 | 5830418KC | 5832426L2  |
| chr2  | 31945302 | 31945375 | Intergenic |   | RMER15 L   | -5833   | NM_14552 | 227721 | Ppapdc3   | D830019K1  |



|       |          |          |            |            |        |          |        |           |            |
|-------|----------|----------|------------|------------|--------|----------|--------|-----------|------------|
| chr3  | 94386827 | 94387300 | promoter-1 | promoter-1 | -425   | NM_02972 | 76742  | Snx27     | 5730552M   |
| chr9  | 72978477 | 72978550 | Intergenic | Intergenic | 17237  | NM_19860 | 225215 | Rsl24d1   | 2410159K2  |
| chr1  | 84937577 | 84937850 | Intergenic | Intergenic | -6055  | NM_02792 | 71781  | Slc16a14  | 1110004H1  |
| chr8  | 86265127 | 86265300 | promoter-1 | promoter-1 | -3     | NM_00116 | 26364  | Cd97      | AA409984   |
| chr4  | 1.19E+08 | 1.19E+08 | promoter-1 | promoter-1 | -570   | NM_01173 | 22608  | Ybx1      | 1700102N1  |
| chr14 | 70253802 | 70254100 | intron (NM | intron (NM | 13737  | NM_02852 | 73523  | Pebp4     | PEBP-4     |
| chr3  | 51145402 | 51145525 | promoter-1 | promoter-1 | -897   | NM_02350 | 69257  | Elf2      | 2610036A2  |
| chr1  | 36315077 | 36315175 | Intergenic | RMER4B L   | -13979 | NM_19889 | 320011 | Uggt1     | 0910001L1  |
| chr18 | 38643627 | 38643850 | Intergenic | MLT1B LTF  | 65109  | NM_02299 | 65113  | Ndfip1    | 0610010M   |
| chr15 | 99200877 | 99201000 | promoter-1 | promoter-1 | -41    | NM_01171 | 22379  | Fmnl3     | 2700073BC  |
| chr12 | 57446852 | 57447000 | promoter-1 | promoter-1 | -45    | NM_14544 | 217588 | Mbip      | 4933408E0  |
| chr12 | 85534827 | 85534900 | 5' UTR (NV | 5' UTR (NV | 102    | NM_00116 | 238317 | Elmsan1   | 9430029N1  |
| chr9  | 1.22E+08 | 1.22E+08 | Intergenic | Intergenic | -1608  | NM_00116 | 20623  | Snrk      | 2010012F0  |
| chr2  | 1.55E+08 | 1.55E+08 | promoter-1 | promoter-1 | -334   | NM_02603 | 67204  | Eif2s2    | 2810026E1  |
| chr6  | 82716652 | 82716775 | intron (NM | intron (NM | 7735   | NM_01382 | 15277  | Hk2       | AI642394   |
| chr4  | 55343052 | 55343150 | Intergenic | Intergenic | -19813 | NM_00901 | 19359  | Rad23b    | 0610007D1  |
| chr1  | 1.37E+08 | 1.37E+08 | promoter-1 | promoter-1 | -241   | NM_02602 | 67196  | Ube2t     | 2700084L2  |
| chr3  | 20054652 | 20054800 | intron (NM | CpG        | 289    | NM_01375 | 27357  | Gyg       | AU017667   |
| chr4  | 65850202 | 65850450 | intron (NM | intron (NM | 215191 | NM_01951 | 56079  | Astn2     | 1d8 Astnl  |
| chr3  | 1.08E+08 | 1.08E+08 | intron (NM | MIRb SINE  | 4042   | NM_00814 | 14686  | Gnat2     | AW490837   |
| chr11 | 1.2E+08  | 1.2E+08  | TTS (NM_0  | TTS (NM_0  | 118    | NM_02720 | 56282  | Mrpl12    | 0610034O1  |
| chr8  | 26221577 | 26221775 | Intergenic | Intergenic | -9393  | NM_03125 | 83436  | Plekha2   | 6430512N2  |
| chr4  | 1.41E+08 | 1.41E+08 | promoter-1 | promoter-1 | -476   | NM_01976 | 56381  | Spn       | Mint mKIA  |
| chr9  | 21807627 | 21807725 | promoter-1 | promoter-1 | 244    | NM_00892 | 19089  | Prkcsh    | 80K-H PKC  |
| chr15 | 66871152 | 66871325 | Intergenic | Intergenic | -70035 | NM_00868 | 17988  | Ndrp1     | CAP43 CM   |
| chr14 | 47973777 | 47973925 | Intergenic | Intergenic | -19684 | NM_01070 | 16854  | Lgals3    | GBP L-34   |
| chr15 | 76059752 | 76059825 | exon (NM_  | exon (NM_  | 139    | NM_20138 | 18810  | Plec      | AA591047   |
| chr1  | 1.84E+08 | 1.84E+08 | Intergenic | L1_Mus2 L  | -21024 | NM_00979 | 12334  | Capn2     | AI326419   |
| chr8  | 68918152 | 68918325 | intron (NM | intron (NM | 8038   | NM_00116 | 72925  | 1-Mar     | 2900024D2  |
| chrX  | 1.37E+08 | 1.37E+08 | Intergenic | Intergenic | -13665 | NM_00107 | 14605  | Tsc22d3   | DIP Dsip1  |
| chr18 | 67879602 | 67879975 | intron (NM | intron (NM | 4487   | NM_00112 | 19255  | Ptpn2     | AI325124   |
| chr10 | 1.07E+08 | 1.07E+08 | Intergenic | Intergenic | -36011 | NM_00117 | 628870 | Otogl     | EG628870   |
| chr7  | 1.28E+08 | 1.28E+08 | promoter-1 | promoter-1 | -133   | NM_00116 | 233812 | BC030336  | -          |
| chr7  | 59117377 | 59117550 | exon (NM_  | exon (NM_  | 174    | NM_00111 | 1E+08  | Fancf     | A730016A1  |
| chr17 | 46817152 | 46817300 | promoter-1 | promoter-1 | -176   | NM_00127 | 17256  | Mea1      | Mea-1      |
| chr11 | 97687477 | 97687600 | intron (NM | intron (NM | -14556 | NM_00108 | 68127  | B230217C1 | AI840637   |
| chr4  | 1.29E+08 | 1.29E+08 | Intergenic | Intergenic | -11755 | NM_01689 | 11637  | Ak2       | Ak-2 D4Ert |
| chr1  | 1.34E+08 | 1.34E+08 | intron (NM | intron (NM | 11102  | NM_17724 | 320718 | Slc26a9   | E030002L0  |
| chr12 | 36739102 | 36739225 | Intergenic | MYSERV16   | 19651  | NM_01178 | 23795  | Agr2      | Agr2h Gob  |
| chr1  | 1.68E+08 | 1.68E+08 | intron (NM | intron (NM | 7474   | NM_17859 | 226594 | Rcsd1     | A430105K1  |
| chr1  | 82836552 | 82836775 | intron (NM | CpG        | 605    | NM_01047 | 15463  | Agfg1     | AU045498   |
| chr11 | 22882027 | 22882200 | exon (NM_  | exon (NM_  | 171    | NM_14451 | 17846  | Commd1    | AI256843   |
| chr9  | 53474877 | 53474950 | intron (NM | CpG        | 699    | NM_00116 | 75717  | Cul5      | 4921514I2  |
| chr8  | 74012252 | 74012350 | 5' UTR (NV | 5' UTR (NV | 299    | NM_03254 | 70359  | Gtpbp3    | 2410009F1  |
| chr8  | 36342002 | 36342375 | Intergenic | Intergenic | -96607 | NM_17774 | 244416 | Ppp1r3b   | 6430576E2  |
| chr11 | 1.01E+08 | 1.01E+08 | exon (NM_  | exon (NM_  | 487    | NM_01203 | 26949  | Vat1      | VAT-1      |
| chr1  | 1.68E+08 | 1.68E+08 | intron (NM | intron (NM | 16437  | NM_17859 | 226594 | Rcsd1     | A430105K1  |

|       |          |          |            |            |         |          |        |            |            |
|-------|----------|----------|------------|------------|---------|----------|--------|------------|------------|
| chr1  | 1.46E+08 | 1.46E+08 | Intergenic | Intergenic | -81429  | NM_01581 | 50778  | Rgs1       | BL34       |
| chr9  | 15513702 | 15513925 | promoter-1 | promoter-1 | -400    | NM_17228 | 234967 | Slc36a4    | 633057311! |
| chr1  | 1.36E+08 | 1.36E+08 | intron (NM | intron (NM | 531     | NM_00757 | 12227  | Btg2       | AA959598   |
| chr10 | 53794952 | 53795200 | promoter-1 | promoter-1 | 526     | NM_00854 | 17155  | Man1a      | Man1a1 P!  |
| chr16 | 17722802 | 17722950 | exon (NM_  | exon (NM_  | 117     | NM_00128 | 94112  | Med15      | A230074L1  |
| chr1  | 1.53E+08 | 1.53E+08 | Intergenic | Intergenic | -73865  | NM_00103 | 117198 | Ivns1abp   | 1190004M   |
| chr12 | 80397152 | 80397275 | promoter-1 | promoter-1 | 56      | NM_00100 | 211978 | Zfyve26    | 4930465A1  |
| chr5  | 66251927 | 66252300 | Intergenic | Intergenic | -2695   | NM_00108 | 74734  | Rhoh       | 5830400AC  |
| chr19 | 3423177  | 3423450  | Intergenic | Intergenic | -8856   | NM_01025 | 14419  | Gal        | Galn       |
| chr13 | 97760702 | 97760850 | Intergenic | Intergenic | 43541   | NM_02558 | 66479  | 1700029F1- |            |
| chr5  | 99712802 | 99712925 | Intergenic | Intergenic | -30917  | NM_14583 | 320292 | Rasgef1b   | 4732452OC  |
| chr15 | 59505552 | 59505800 | Intergenic | Intergenic | 25467   | NM_14454 | 211770 | Trib1      | A530090O:  |
| chr6  | 1.19E+08 | 1.19E+08 | intron (NM | intron (NM | 8466    | NM_00127 | 22419  | Wnt5b      | AW545702   |
| chr3  | 1.17E+08 | 1.17E+08 | Intergenic | Intergenic | -14584  | NM_00111 | 20321  | Frrs1      | AI131732 ! |
| chr4  | 3782252  | 3782400  | Intergenic | L1MB8 LIN  | 16926   | NM_02002 | 17451  | Mos        | c-mos      |
| chr1  | 1.8E+08  | 1.8E+08  | 5' UTR (NM | 5' UTR (NM | 232     | NM_00116 | 269152 | Kif26b     | 4832420M   |
| chr5  | 31357027 | 31357275 | promoter-1 | promoter-1 | -2      | NM_00128 | 69719  | Cad        | 2410008JO  |
| chr11 | 75993227 | 75993375 | promoter-1 | promoter-1 | -169    | NM_02666 | 68299  | Vps53      | 2010002AC  |
| chr4  | 1.55E+08 | 1.55E+08 | promoter-1 | promoter-1 | -244    | NM_00116 | 14688  | Gnb1       | AA409223   |
| chr6  | 63383627 | 63383775 | intron (NM | intron (NM | 176850  | NM_00816 | 14804  | Grid2      | B230104LO  |
| chr7  | 36103177 | 36103300 | intron (NM | CpG        | 221     | NM_02618 | 67471  | Gpatch1    | 1300003A1  |
| chr12 | 35633802 | 35633900 | Intergenic | Intergenic | -32084  | NM_00127 | 79221  | Hdac9      | AV022454   |
| chr16 | 16035752 | 16035850 | intron (NM | Lx9 LINE L | 111143  | NM_14606 | 224008 | Spidr      | 2310008HC  |
| chr13 | 52684277 | 52684675 | intron (NM | (ATG)n Sin | 5670    | NM_00119 | 20963  | Syk        | Sykb       |
| chr1  | 40115252 | 40115400 | Intergenic | Intergenic | -26287  | NM_01055 | 16178  | Il1r2      | CD121b Il1 |
| chr15 | 81702002 | 81702175 | promoter-1 | promoter-1 | 234     | NM_02673 | 68479  | Phf5a      | 1110007BC  |
| chr15 | 65934877 | 65935225 | intron (NM | intron (NM | -126685 | NM_00114 | 654498 | Hhla1      | F930104E1  |
| chr2  | 1.44E+08 | 1.44E+08 | intron (NM | LTR16E1 L' | 16071   | NM_00975 | 12075  | Bfsp1      | CP95       |
| chr6  | 83299352 | 83299500 | promoter-1 | promoter-1 | -52     | NM_17527 | 78653  | Bola3      | 1810056O:  |
| chr1  | 72302452 | 72302525 | Intergenic | Intergenic | 28400   | NM_02352 | 111175 | Pecr       | 2400003B1  |
| chr3  | 1.16E+08 | 1.16E+08 | TTS (NM_0  | TTS (NM_0  | -27803  | NM_14490 | 229782 | Slc35a3    | 2310050P1  |
| chr10 | 57814352 | 57814525 | intron (NM | intron (NM | -19764  | NM_20124 | 110829 | Lims1      | 2310016J2  |
| chr1  | 99615177 | 99615325 | intron (NM | intron (NM | 51418   | NM_17376 | 227399 | Ppip5k2    | AW555814   |
| chr17 | 31875252 | 31875375 | Intergenic | Intergenic | 60437   | NM_00127 | 12954  | Cryaa      | Acry-1 Cry |
| chr14 | 56196652 | 56197225 | promoter-1 | promoter-1 | -393    | NM_01118 | 19186  | Psme1      | AW413925   |
| chr4  | 86257602 | 86257700 | exon (NM_  | exon (NM_  | 275     | NM_17340 | 230376 | Haus6      | 6230416J2  |
| chr11 | 1.07E+08 | 1.07E+08 | intron (NM | intron (NM | 7385    | NM_17685 | 207165 | Bptf       | 9430093H1  |
| chr1  | 36125127 | 36125250 | promoter-1 | promoter-1 | -57     | NM_01581 | 50785  | Hs6st1     | 6Ost1      |
| chr13 | 35656002 | 35656300 | Intergenic | Intergenic | -95580  | NM_00988 | 12593  | Cdyl       | AI325931   |
| chr17 | 31418802 | 31418925 | Intergenic | Intergenic | -4562   | NM_02529 | 22092  | Rsph1      | MCA Tsga:  |
| chr1  | 1.66E+08 | 1.66E+08 | promoter-1 | promoter-1 | 92      | NM_02877 | 240880 | Scyl3      | 1200016D:  |
| chr3  | 94758202 | 94758425 | promoter-1 | promoter-1 | -624    | NM_01739 | 53970  | Rfx5       | -          |
| chr6  | 72325052 | 72325300 | intron (NM | B4A SINE   | 5286    | NM_01687 | 53620  | Vamp5      | AF119384   |
| chr1  | 1.41E+08 | 1.41E+08 | intron (NM | intron (NM | 440     | NM_00116 | 329260 | Dennd1b    | 4632404N1  |
| chr15 | 91009077 | 91009475 | intron (NM | intron (NM | 12962   | NM_01199 | 26874  | Abcd2      | ABC39 ALI  |
| chr4  | 11029852 | 11030125 | Intergenic | Intergenic | -26636  | NM_00108 | 76947  | Ndufaf6    | 2310030NC  |
| chr14 | 20901702 | 20902350 | intron (NM | intron (NM | 368     | NM_02620 | 67509  | Saysd1     | 1810063BC  |

|       |          |          |                       |        |           |        |            |            |
|-------|----------|----------|-----------------------|--------|-----------|--------|------------|------------|
| chr14 | 35315177 | 35315325 | intron (NM CpG        | 481    | NM_00975  | 12166  | Bmpr1a     | 111003712: |
| chr12 | 53198677 | 53198775 | promoter-1promoter-1  | -7     | NM_02976  | 76826  | Nubpl      | 2410170E0  |
| chr15 | 90497302 | 90497750 | intron (NM intron (NM | 12293  | NM_02581  | 66871  | Cpne8      | 1200003E1  |
| chr15 | 35360077 | 35360350 | intron (NML1M5 LINE   | 58912  | NM_17715  | 666173 | Vps13b     | 1810042BC  |
| chr8  | 64410002 | 64410125 | intron (NMLx7 LINE L  | 3179   | NM_00129  | 234311 | Ddx60      | 9830118M   |
| chr8  | 67351427 | 67351575 | intron (NM intron (NM | 22321  | NM_17863  | 77113  | Klhl2      | 6030411N2  |
| chr4  | 88368052 | 88368275 | 5' UTR (NV 5' UTR (NV | 249    | NM_17287  | 242521 | Klhl9      | 8030469PC  |
| chr16 | 85132377 | 85132525 | intron (NM intron (NM | 41501  | NM_00119  | 11820  | App        | Abeta Abp  |
| chr11 | 53113427 | 53113550 | intron (NM CpG        | 493    | NM_00830  | 15525  | Hspa4      | 70kDa Al3  |
| chr2  | 1.12E+08 | 1.12E+08 | promoter-1promoter-1  | -83    | NM_02884  | 74268  | Aven       | 1700013AC  |
| chr5  | 1.47E+08 | 1.47E+08 | intron (NM MMAR1 D    | 17187  | NM_15359  | 264064 | Cdk8       | -          |
| chr15 | 78809227 | 78809550 | intron (NM intron (NM | -4098  | NM_00102  | 110253 | Triobb     | AI428493 I |
| chr5  | 1.26E+08 | 1.26E+08 | promoter-1promoter-1  | -567   | NM_01142  | 20602  | Ncor2      | N-CoR SMI  |
| chr2  | 33727452 | 33727625 | intron (NM intron (NM | 15928  | NM_17518  | 72543  | Mvb12b     | 26102000:  |
| chr3  | 97413877 | 97414075 | intron (NM CpG        | 137    | NM_02653  | 68058  | Chd1l      | 4432404A2  |
| chr15 | 22991327 | 22991525 | intron (NMLx2B LINE   | 25208  | NM_00108  | 320865 | Cdh18      | B230220E1  |
| chr10 | 60664327 | 60664750 | intron (NM intron (NM | 26528  | NM_02306  | 65971  | Tbata      | 1700021KC  |
| chr6  | 99616427 | 99616575 | intron (NM CpG        | 264    | NM_02582  | 66892  | Eif4e3     | 1300018P1  |
| chr10 | 1.27E+08 | 1.27E+08 | intron (NM CpG        | 736    | NM_00111  | 17938  | Naca       | AL022831   |
| chr11 | 1.01E+08 | 1.01E+08 | exon (NM_exon (NM_    | 280    | NM_00103  | 14534  | Kat2a      | 1110051E1  |
| chr2  | 4984652  | 4984800  | intron (NM intron (NM | 258    | NM_18184  | 71648  | Optn       | 4930441OC  |
| chr9  | 1.23E+08 | 1.23E+08 | intron (NM CpG        | 186    | NM_00101  | 382117 | Tcaim      | D9Ert402:  |
| chr10 | 79784077 | 79784225 | promoter-1promoter-1  | -858   | NM_02552  | 66374  | 2310011J0  | AI452186 , |
| chr8  | 28133577 | 28133650 | promoter-1promoter-1  | -658   | NM_15359  | 244373 | Erlin2     | BC036333   |
| chr10 | 51953602 | 51953825 | intron (NM CpG        | 288    | NM_02570  | 66686  | Dcbld1     | 4631413K1  |
| chr5  | 1.51E+08 | 1.51E+08 | intron (NM intron (NM | 1399   | NM_13389  | 100637 | N4bp211    | 2410024N1  |
| chr17 | 26389952 | 26390075 | exon (NM_exon (NM_    | 158    | NR_03790: | 66978  | Luc7l      | 1810045CC  |
| chr8  | 96910052 | 96910325 | promoter-1promoter-1  | -212   | NM_02233  | 64209  | Herpud1    | Herp Mifl  |
| chr6  | 81915652 | 81915825 | exon (NM_exon (NM_    | 205    | NM_02649  | 56284  | Mrpl19     | 9030416F1  |
| chr5  | 1.4E+08  | 1.4E+08  | promoter-1promoter-1  | -16    | NM_02560  | 66506  | Psmg3      | 1810042KC  |
| chr11 | 35641402 | 35641475 | intron (NM intron (NM | 6592   | NM_02593  | 104458 | Rars       | 2610011N1  |
| chr12 | 1.19E+08 | 1.19E+08 | intron (NM (TTC)n Sim | -96333 | NM_14604  | 217946 | Cdca7l     | BC006933   |
| chr10 | 66550277 | 66550375 | intron (NM intron (NM | 9410   | NM_00120  | 28193  | Reep3      | D10Ucla1   |
| chr2  | 1.48E+08 | 1.48E+08 | Intergenic B3 SINE B: | 14983  | NM_01074  | 17064  | Cd93       | 6030404GC  |
| chr15 | 82840127 | 82840275 | intron (NM intron (NM | 13367  | NM_02872  | 74039  | Nfam1      | 4921501M   |
| chr7  | 1.16E+08 | 1.16E+08 | promoter-1promoter-1  | -91    | NM_02534  | 66085  | Eif3f      | 0610037M   |
| chr11 | 1.04E+08 | 1.04E+08 | exon (NM_exon (NM_    | 17367  | NM_00108  | 76719  | Kansl1     | 1700081L1  |
| chr5  | 3463327  | 3463675  | intron (NM intron (NM | -80332 | NM_00104  | 68152  | Fam133b    | 2900022KC  |
| chr3  | 86028377 | 86028575 | promoter-1promoter-1  | -136   | NM_00107  | 80877  | Lrba       | C80285 D3  |
| chr10 | 20603652 | 20603750 | Intergenic Intergenic | -68652 | NM_02620  | 52906  | Ahi1       | 1700015F0  |
| chr11 | 67380477 | 67380600 | intron (NM MTD LTR I  | -19464 | NM_00110  | 14457  | Gas7       | AW124766   |
| chr1  | 1.94E+08 | 1.94E+08 | promoter-1promoter-1  | -659   | NM_00957  | 22782  | Slc30a1    | AI839647 I |
| chr1  | 88339752 | 88340050 | Intergenic Intergenic | 16997  | NM_02796  | 71863  | 17000190:- |            |
| chr17 | 35873452 | 35873750 | Intergenic B1_Mur4 S  | -32517 | NM_17296  | 12305  | Ddr1       | 6030432F1  |
| chr14 | 64803377 | 64803600 | intron (NM intron (NM | 80328  | NM_02852  | 73382  | Prss52     | 1700049K1  |
| chr4  | 1.09E+08 | 1.09E+08 | promoter-1promoter-1  | -702   | NM_00130  | 12580  | Cdkn2c     | C77269 IN  |
| chr16 | 20724402 | 20724525 | TTS (NM_0 TTS (NM_0   | 6208   | NM_00128  | 21832  | Thpo       | Mgdf M N   |

|       |          |          |              |             |         |           |        |            |             |
|-------|----------|----------|--------------|-------------|---------|-----------|--------|------------|-------------|
| chr9  | 44074627 | 44074725 | intron (NM   | intron (NM  | 1594    | NM_00116  | 270151 | Nlrx1      | BC034204    |
| chr8  | 1.14E+08 | 1.14E+08 | exon (NM_    | exon (NM_   | 237     | NM_02827  | 72544  | Exosc6     | 2610510N2   |
| chr7  | 1.35E+08 | 1.35E+08 | promoter-1   | promoter-1  | -277    | NM_17802  | 233904 | Setd1a     | BC010250    |
| chr18 | 37803577 | 37803750 | 5' UTR (NM   | 5' UTR (NM  | 195     | NM_17577  | 24074  | Taf7       | 55kDa A16   |
| chr10 | 21790052 | 21790275 | Intergenic   | Intergenic  | -2278   | NM_05326  | 114671 | 4930444G2- |             |
| chr3  | 1.33E+08 | 1.33E+08 | Intergenic   | Intergenic  | 107716  | NM_00104  | 214133 | Tet2       | Ayu17-449   |
| chr15 | 79604702 | 79604800 | intron (NM   | CpG         | 146     | NM_01747  | 54152  | Dnal4      | D15Ert42.   |
| chr8  | 98424427 | 98424550 | Intergenic   | Lx6 LINE L  | -12223  | NM_01032  | 14719  | Got2       | AL022787    |
| chr5  | 1.39E+08 | 1.39E+08 | 5' UTR (NM   | 5' UTR (NM  | 228     | NM_03056  | 80752  | Fam20c     | C76981 DN   |
| chr13 | 16023377 | 16023550 | Intergenic   | Intergenic  | -82845  | NM_00838  | 16323  | Inhba      | -           |
| chr19 | 7562277  | 7562450  | Intergenic   | Intergenic  | -4582   | NM_00100  | 20168  | Rtn3       | RTN3-A1     |
| chr16 | 64770702 | 64771075 | promoter-1   | promoter-1  | -123    | NM_02627  | 67609  | 4930453N2  | AI649104    |
| chr6  | 1.2E+08  | 1.2E+08  | intron (NM   | intron (NM  | 49515   | NM_01671  | 29862  | Ninj2      | -           |
| chr4  | 1.52E+08 | 1.52E+08 | intron (NR_  | intron (NR_ | 1478    | NR_10229: | 19934  | Rpl22      | 2700038K1   |
| chr10 | 92773127 | 92773200 | intron (NM   | CpG         | 741     | NM_01350  | 13713  | Elk3       | D430049E2   |
| chr17 | 51061702 | 51061950 | intron (NM   | intron (NM  | 223820  | NM_00129  | 12228  | Btg3       | ANA tob5    |
| chr13 | 1.05E+08 | 1.05E+08 | intron (NM   | intron (NM  | 71118   | NM_02944  | 75805  | Nln        | 4930472G1   |
| chr4  | 40704727 | 40704825 | intron (NM   | CpG         | 142     | NM_02153  | 74255  | Smu1       | 2600001OC   |
| chr15 | 79346952 | 79347025 | exon (NM_    | exon (NM_   | 150     | NM_13409  | 105785 | Kdelr3     | AI173274    |
| chr5  | 1.48E+08 | 1.48E+08 | intron (NM   | CpG-11811   | 404     | NM_00908  | 20018  | Polr1d     | 1110003G1   |
| chr16 | 87710302 | 87710425 | intron (NML1 | M5 LINE     | 11164   | NM_00752  | 12013  | Bach1      | 6230421PC   |
| chr6  | 99125477 | 99125575 | intron (NM   | intron (NM  | 90983   | NM_00119  | 108655 | Foxp1      | 3110052D1   |
| chr4  | 1.36E+08 | 1.36E+08 | Intergenic   | (ATG)n Sin  | -36826  | NM_00128  | 15552  | Htr1d      | 5-HT-1D 5-  |
| chr1  | 1.33E+08 | 1.33E+08 | intron (NM   | MTE2a LTF   | 34442   | NM_01070  | 16865  | Eif2d      | D1Ert425e I |
| chr4  | 1.17E+08 | 1.17E+08 | promoter-1   | promoter-1  | -12     | NM_17513  | 108067 | Eif2b3     | 1190002P1   |
| chr6  | 1.37E+08 | 1.37E+08 | Intergenic   | Intergenic  | 10232   | NM_02389  | 78600  | Pde6h      | A930033D:   |
| chr1  | 1.4E+08  | 1.4E+08  | Intergenic   | IAPEY3-int  | -45289  | NM_17739  | 338375 | Atp6v1g3   | -           |
| chr12 | 66176577 | 66176650 | promoter-1   | promoter-1  | 20      | NM_17891  | 104806 | Fancm      | AI427100 C  |
| chr10 | 62892552 | 62892700 | promoter-1   | promoter-1  | -220    | NM_17761  | 216033 | Ctnna3     | 4930429L0   |
| chr7  | 52111827 | 52112100 | promoter-1   | promoter-1  | -553    | NM_02154  | 59047  | Pnkp       | 1810009GC   |
| chr8  | 8751302  | 8751450  | Intergenic   | Intergenic  | -60839  | NM_17684  | 234023 | Arglu1     | 9430010OC   |
| chr15 | 74916902 | 74917550 | Intergenic   | Intergenic  | 25153   | NM_00109  | 1E+08  | Ly6c2      | Ly-6C.2 Ly- |
| chr8  | 59911652 | 59911900 | Intergenic   | Intergenic  | -22944  | NM_00913  | 20284  | Scrg1      | AW124307    |
| chr8  | 48760752 | 48760925 | promoter-1   | promoter-1  | -325    | NM_02350  | 69260  | Ing2       | 2810011M    |
| chr6  | 1.41E+08 | 1.41E+08 | intron (NM   | intron (NM  | 5382    | NM_00963  | 11569  | Aebp2      | AU023766    |
| chr11 | 69223752 | 69223875 | intron (NM   | CpG         | 3364    | NM_00101  | 216850 | Kdm6b      | 1700064E0   |
| chr6  | 71444477 | 71444675 | 5' UTR (NM   | 5' UTR (NM  | 688     | NM_00954  | 22644  | Rnf103     | AW146237    |
| chr2  | 1.81E+08 | 1.81E+08 | promoter-1   | promoter-1  | -548    | NM_13370  | 68879  | Prpf6      | 1190003AC   |
| chr16 | 17928277 | 17928450 | promoter-1   | promoter-1  | -51     | NM_15315  | 13358  | Slc25a1    | 1300019PC   |
| chr5  | 52216977 | 52217100 | Intergenic   | Intergenic  | -271878 | NM_00890  | 19017  | Ppargc1a   | A830037N0   |
| chr1  | 92764377 | 92764475 | Intergenic   | Intergenic  | -23878  | NM_00124  | 12835  | Col6a3     | AI507288 C  |
| chr9  | 70686952 | 70687050 | intron (NM   | intron (NM  | 95614   | NM_00828  | 15450  | Lipc       | AI256194 I  |
| chr2  | 6133602  | 6133925  | intron (NM   | intron (NM  | 277     | NM_02420  | 67856  | Echdc3     | 2310005D1   |
| chr4  | 58343752 | 58344150 | intron (NM   | intron (NM  | 45117   | NM_01094  | 18198  | Musk       | Mdk4 MIk    |
| chr3  | 89050802 | 89050875 | exon (NM_    | exon (NM_   | 478     | NM_02532  | 66059  | Krtcap2    | 0610010I1:  |
| chr10 | 81590752 | 81590850 | promoter-1   | promoter-1  | 43      | NM_00116  | 216177 | AU041133   | -           |
| chr6  | 1.27E+08 | 1.27E+08 | Intergenic   | Intergenic  | -48355  | NM_00103  | 381812 | Cracr2a    | Efcab4b Gi  |

|       |          |          |            |            |        |           |        |            |            |
|-------|----------|----------|------------|------------|--------|-----------|--------|------------|------------|
| chr14 | 69930602 | 69930675 | Intergenic | Intergenic | -18282 | NM_17342  | 239167 | Synb       | D930020EC  |
| chr2  | 1.14E+08 | 1.14E+08 | intron (NM | CpG        | 176    | NM_02567  | 66632  | Dph6       | 5730421E1  |
| chr2  | 1.52E+08 | 1.52E+08 | promoter-1 | promoter-1 | -72    | NM_21244  | 228769 | Psmf1      | AW048666   |
| chr9  | 78290627 | 78291100 | exon (NM_  | exon (NM_  | 181    | NR_12572: | 214763 | Mb21d1     | E330016A1  |
| chr4  | 34634402 | 34634625 | 5' UTR (NV | 5' UTR (NV | 174    | NM_01189  | 24060  | Slc35a1    | AA408150   |
| chr4  | 56770077 | 56770450 | intron (NM | intron (NM | 13969  | NM_00961  | 11470  | Actl7a     | Tact2      |
| chr5  | 1.25E+08 | 1.25E+08 | intron (NM | CpG        | 546    | NM_14450  | 65105  | Arl6ip4    | AA408210   |
| chr1  | 39592577 | 39592850 | promoter-1 | promoter-1 | 66     | NM_02804  | 52846  | Cnot11     | 2410015L1  |
| chr12 | 1.12E+08 | 1.12E+08 | exon (NM_  | exon (NM_  | 204    | NM_19802  | 217864 | Rcor1      | 5730409O:  |
| chr11 | 1.15E+08 | 1.15E+08 | Intergenic | Intergenic | 7495   | NM_02786  | 71679  | Atp5h      | 0610009D1  |
| chr2  | 91297827 | 91298100 | intron (NM | CpG        | 275    | NM_00114  | 228357 | Lrp4       | 6430526J1  |
| chr14 | 33437352 | 33437800 | intron (NM | intron (NM | 24463  | NM_00100  | 107751 | Prrxl1     | Drg11 Drg: |
| chr14 | 55331577 | 55331725 | promoter-1 | promoter-1 | -640   | NM_20713  | 110794 | Cebpe      | C/EBPe CR  |
| chr7  | 19589252 | 19589475 | promoter-1 | promoter-1 | -51    | NM_17875  | 272359 | Irf2bp1    | 6330414OC  |
| chr18 | 73732527 | 73732825 | 5' UTR (NV | 5' UTR (NV | 317    | NM_00103  | 240396 | Mex3c      | A130001D:  |
| chr1  | 1.35E+08 | 1.35E+08 | Intergenic | tRNA-Lys-A | -8676  | NM_00857  | 17248  | Mdm4       | 4933417NC  |
| chr12 | 1.13E+08 | 1.13E+08 | promoter-1 | promoter-1 | -90    | NM_00109  | 328162 | Trmt61a    | 6720458FO  |
| chr10 | 26525977 | 26526100 | intron (NM | intron (NM | 33720  | NM_17683  | 73910  | Arhgap18   | 4833419JO  |
| chr1  | 1.09E+08 | 1.09E+08 | Intergenic | Intergenic | -30345 | NM_01145  | 20725  | Serpinb8   | CAP-2 CAP  |
| chr13 | 52941077 | 52941225 | intron (NM | intron (NM | 83895  | NM_01670  | 11992  | Auh        | C77140 W   |
| chr18 | 3004627  | 3004800  | Intergenic | (TTTC)n Si | 118699 | NM_00116  | 1E+08  | Vmn1r238   | -          |
| chr1  | 1.66E+08 | 1.66E+08 | Intergenic | MIR SINE   | 21256  | NM_00116  | 20343  | Sell       | AI528707 C |
| chr5  | 1.44E+08 | 1.44E+08 | intron (NM | intron (NM | 1240   | NM_14491  | 231871 | Daglb      | E330036119 |
| chr3  | 97887177 | 97887300 | intron (NM | intron (NM | 69777  | NM_01092  | 18129  | Notch2     | AI853703 I |
| chr8  | 1.27E+08 | 1.27E+08 | Intergenic | L1M5 LINE  | -30818 | NM_13927  | 108148 | Galnt2     | AI480629   |
| chr1  | 89516552 | 89516675 | promoter-1 | promoter-1 | -274   | NM_00111  | 16331  | Inpp5d     | SHIP SHIP- |
| chr16 | 48818777 | 48819050 | TTS (NM_0  | TTS (NM_0  | 1944   | NM_02388  | 57263  | Retnlb     | 9030012B2  |
| chr15 | 57525477 | 57525700 | promoter-1 | promoter-1 | -634   | NM_19944  | 387609 | Zhx2       | Afr-1 Afr1 |
| chr3  | 60241652 | 60241900 | Intergenic | Intergenic | -34976 | NM_00125  | 56758  | Mbnl1      | Mbnl mKI/  |
| chr17 | 24687102 | 24687200 | 5' UTR (NV | 5' UTR (NV | 256    | NM_01363  | 18763  | Pkd1       | PC1 mFLJO  |
| chr9  | 65187102 | 65187175 | Intergenic | Intergenic | -6737  | NM_01668  | 50996  | Pdcd7      | C80112 ES  |
| chr2  | 4802652  | 4803325  | intron (NM | CpG        | 378    | NM_17540  | 109079 | Sephs1     | 1110046B2  |
| chr8  | 42129152 | 42129450 | intron (NM | intron (NM | -2016  | NM_00100  | 102103 | Mtus1      | AI481402 , |
| chr11 | 44333127 | 44333275 | intron (NM | intron (NM | 322    | NM_00116  | 74315  | Rnf145     | 37324131:  |
| chr11 | 11487427 | 11487725 | Intergenic | Intergenic | 98307  | NM_02866  | 73862  | 4930415F1- |            |
| chr9  | 43855502 | 43855600 | 3' UTR (NV | 3' UTR (NV | 4084   | NM_00938  | 21838  | Thy1       | CD90 T25   |
| chr6  | 24596852 | 24597100 | intron (NM | intron (NM | 18019  | NM_00116  | 73178  | Wasl       | 29000211I: |
| chr13 | 43494052 | 43494125 | intron (NM | CpG        | 343    | NM_02355  | 70078  | Nol7       | 2210008F1  |
| chr5  | 1.44E+08 | 1.44E+08 | promoter-1 | promoter-1 | -327   | NM_02974  | 76800  | Usp42      | 2410140KC  |
| chr2  | 1.78E+08 | 1.78E+08 | Intergenic | Intergenic | -1588  | NM_17719  | 320558 | Sycp2      | 3830402K2  |
| chr6  | 1.25E+08 | 1.25E+08 | Intergenic | Intergenic | -2671  | NM_01353  | 14794  | Spsb2      | AI461677 C |
| chr6  | 1.46E+08 | 1.46E+08 | intron (NM | intron (NM | 103132 | NM_01058  | 16439  | Itpr2      | AI649341 I |
| chr16 | 34753227 | 34753350 | Intergenic | Intergenic | -31748 | NM_13930  | 107589 | Mylk       | 9530072E1  |
| chr17 | 79754377 | 79754575 | promoter-1 | promoter-1 | -45    | NM_02651  | 260409 | Cdc42ep3   | 3200001FO  |
| chr6  | 34664527 | 34664875 | intron (NM | intron (NM | 5257   | NM_14557  | 109624 | Cald1      | 4833423D1  |
| chr7  | 1.07E+08 | 1.07E+08 | Intergenic | Intergenic | -19579 | NM_02762  | 70974  | Pgm2l1     | 4931406N1  |
| chr8  | 47511727 | 47511925 | Intergenic | Intergenic | -44570 | NM_00798  | 14081  | Acsl1      | Acas Acas1 |

|       |          |          |                     |            |         |           |        |          |            |
|-------|----------|----------|---------------------|------------|---------|-----------|--------|----------|------------|
| chr1  | 87527152 | 87527275 | intron (NM          | intron (NM | -19412  | NM_01367  | 20684  | Sp100    | A430075G:  |
| chr12 | 16059852 | 16060075 | Intergenic          | Intergenic | -236372 | NM_14455  | 217410 | Trib2    | AW319517   |
| chr5  | 21291077 | 21291225 | promoter-1          | promoter-1 | 50      | NM_01118  | 19181  | Psmc2    | -          |
| chr5  | 1.3E+08  | 1.3E+08  | promoter-1          | promoter-1 | -593    | NM_00939  | 19384  | Ran      | -          |
| chr3  | 63768327 | 63768925 | promoter-1          | promoter-1 | 29      | NM_00127  | 11416  | Slc33a1  | AI315656   |
| chr1  | 94369852 | 94370525 | intron (NM          | CpG        | 147     | NM_02419  | 67273  | Ndufa10  | 2900053E1  |
| chr6  | 1.29E+08 | 1.29E+08 | intron (NM          | RMER12B    | -25043  | NM_03059  | 80782  | Klrb1b   | Klrb1d Ly5 |
| chr6  | 51831077 | 51831150 | intron (NM          | intron (NM | 131435  | NM_01877  | 54353  | Skap2    | 2610021A1  |
| chrX  | 9028777  | 9028950  | intron (NM          | intron (NM | 17587   | NM_00780  | 13058  | Cybb     | C88302 CC  |
| chr17 | 56395002 | 56395150 | Intergenic          | AT_rich Lo | -1140   | NM_01019  | 14154  | Fem1a    | AW611390   |
| chr2  | 1.02E+08 | 1.02E+08 | intron (NM          | intron (NM | 16263   | NM_17518  | 72446  | Prr5l    | 2600010E0  |
| chr11 | 32242477 | 32242975 | Intergenic          | (TG)n Simf | -5085   | NM_17736  | 268396 | Sh3pxd2b | G431001E0  |
| chr15 | 75899827 | 75899975 | TTS (NM_0           | TTS (NM_0  | 259     | NM_13408  | 105782 | Scrib    | AI118201 f |
| chr9  | 55004202 | 55004275 | intron (NM          | intron (NM | 7062    | NM_18060  | 109161 | Ube2q2   | 3010021M   |
| chr1  | 36931777 | 36932100 | intron (NM          | ORR1E LTF  | 64434   | NM_01887  | 56030  | Tmem131  | 2610524E0  |
| chr2  | 1.7E+08  | 1.7E+08  | Intergenic          | Intergenic | -12651  | NM_00115  | 228913 | Zfp217   | 4933431CC  |
| chr13 | 99584502 | 99584775 | intron (NM          | CpG        | 766     | NM_17259  | 218503 | Fcho2    | 5832424M   |
| chr19 | 37657127 | 37657350 | intron (NML1M4c LIN |            | 32330   | NM_17535  | 107371 | Exoc6    | 4833405E0  |
| chr10 | 17667452 | 17667725 | exon (NM_           | exon (NM_  | 285     | NM_00103  | 380629 | Heca     | Gm869 HC   |
| chr9  | 64585227 | 64585300 | intron (NM          | CpG        | 300     | NM_01738  | 53869  | Rab11a   | -          |
| chr8  | 98157277 | 98157675 | promoter-1          | promoter-1 | 17      | NM_03019  | 78833  | Gins3    | 2700085M   |
| chr11 | 1.03E+08 | 1.03E+08 | intron (NML1MB7 LIN |            | 12490   | NM_18303  | 353047 | Plekhm1  | AP162 B2   |
| chr2  | 34681702 | 34681800 | promoter-1          | promoter-1 | 4       | NM_00116  | 30050  | Fbxw2    | 2700071L0  |
| chr11 | 22186702 | 22186800 | promoter-1          | promoter-1 | 47      | NM_15307  | 216565 | Ehbp1    | AF424697   |
| chr14 | 32890427 | 32890825 | Intergenic          | Intergenic | 7846    | NR_10430: | 105638 | Dph3     | DELGIP1 D  |
| chr1  | 1.83E+08 | 1.83E+08 | Intergenic          | Intergenic | -41419  | NM_20728  | 403180 | Ccdc121  | 6530421E2  |
| chr1  | 88420652 | 88420875 | Intergenic          | Intergenic | -2548   | NM_00897  | 19231  | Ptma     | Thym       |
| chr5  | 1.45E+08 | 1.45E+08 | intron (NM          | intron (NM | 652     | NM_01355  | 15467  | Eif2ak1  | HCR Hri    |
| chr2  | 29922327 | 29922550 | intron (NM          | CpG        | 444     | NM_00120  | 56086  | Set      | 2610030F1  |
| chr12 | 86984602 | 86984800 | Intergenic          | Intergenic | -42969  | NM_01676  | 53314  | Batf     | B-ATF SFA  |
| chr2  | 1.03E+08 | 1.03E+08 | intron (NM(CAAAA)n  |            | 38009   | NM_00117  | 12505  | Cd44     | AU023126   |
| chr19 | 37508352 | 37508550 | promoter-1          | promoter-1 | -880    | NM_00824  | 15242  | Hhex     | Hex Hex1   |
| chr8  | 1.08E+08 | 1.08E+08 | promoter-1          | promoter-1 | 590     | NM_01582  | 50788  | Fbxl8    | FBL8       |
| chr1  | 1.9E+08  | 1.9E+08  | intron (NM          | intron (NM | -164668 | NM_01193  | 26381  | Esrrg    | ERR3 Errg  |
| chr15 | 49185977 | 49186275 | Intergenic          | Intergenic | -562591 | NM_00108  | 239420 | Csmd3    | 4930500N1  |
| chr12 | 25183077 | 25183650 | promoter-1          | promoter-1 | -83     | NM_02061  | 21340  | Taf1b    | 4930408GC  |
| chr1  | 34536027 | 34536125 | Intergenic          | Intergenic | -19199  | NM_00935  | 21755  | Prss39   | Tesp1      |
| chr16 | 8471002  | 8471100  | intron (NM          | MIRc SINE  | 145     | NM_14624  | 239706 | Mettl22  | -          |
| chr7  | 1.06E+08 | 1.06E+08 | Intergenic          | Intergenic | -9705   | NM_17744  | 233549 | Mogat2   | DGAT2L5 f  |
| chr9  | 1E+08    | 1E+08    | Intergenic          | Intergenic | 66879   | NM_00103  | 213208 | Il20rb   | AV228068   |
| chr11 | 51688777 | 51688850 | Intergenic          | Intergenic | -17830  | NM_19929  | 76901  | Jade2    | 1200017KC  |
| chr5  | 76565227 | 76565725 | Intergenic          | RLTR11A2   | -3822   | NM_02061  | 57357  | Srd5a3   | 1110025P1  |
| chr6  | 1.23E+08 | 1.23E+08 | Intergenic          | ID_B1 SINI | -9714   | NM_02189  | 60611  | Foxj2    | Fhx        |
| chr5  | 1.4E+08  | 1.4E+08  | intron (NM          | intron (NM | 33587   | NM_00116  | 67604  | Get4     | 1110007L1  |
| chr13 | 1.02E+08 | 1.02E+08 | 5' UTR (NV          | 5' UTR (NV | 169     | NM_02288  | 69048  | Slc30a5  | 1810010KC  |
| chr18 | 74376052 | 74376125 | 5' UTR (NV          | 5' UTR (NV | 222     | NM_02886  | 74322  | Cxxc1    | 241000211f |
| chr2  | 29820477 | 29820575 | promoter-1          | promoter-1 | -554    | NM_00117  | 20740  | Sptan1   | 2610027HC  |

|       |          |          |                       |         |           |        |            |            |
|-------|----------|----------|-----------------------|---------|-----------|--------|------------|------------|
| chr12 | 1.07E+08 | 1.07E+08 | Intergenic CpG        | -47072  | NM_01170  | 22367  | Vrk1       | 51PK       |
| chr19 | 59017927 | 59018000 | promoter-1promoter-1  | 48      | NM_17868  | 226265 | Eno4       | 6430537HC  |
| chr8  | 87823777 | 87823950 | promoter-1promoter-1  | 332     | NR_028268 | 56452  | Orc6       | 67204201I  |
| chr13 | 30637102 | 30637400 | promoter-1promoter-1  | -66     | NM_02571  | 66694  | Uqcfrfs1   | 4430402G1  |
| chr8  | 77518152 | 77518250 | intron (NM CpG        | 599     | NM_17801  | 70823  | Hmgxb4     | 4733401KC  |
| chr6  | 1.2E+08  | 1.2E+08  | intron (NM intron (NM | 10461   | NM_00835  | 16172  | Il17ra     | AW538159   |
| chr16 | 30967952 | 30968175 | intron (NM intron (NM | 113455  | NM_19862  | 268880 | Xxylt1     | AI480653   |
| chr9  | 1.1E+08  | 1.1E+08  | exon (NM_ exon (NM_   | 105     | NM_00108  | 72341  | Elp6       | 2610001P1  |
| chr11 | 49922602 | 49922750 | intron (NM intron (NM | -22186  | NM_00129  | 76795  | Tbc1d9b    | -          |
| chr3  | 90016902 | 90017025 | promoter-1promoter-1  | 606     | NM_00119  | 1E+08  | Rps27rt    | ENSMUSGC   |
| chr1  | 1.83E+08 | 1.83E+08 | Intergenic Intergenic | -45104  | NM_14551  | 226757 | Wdr26      | 1600024AC  |
| chr10 | 74598127 | 74598250 | intron (NM intron (NM | 74547   | NM_00108  | 110279 | Bcr        | 5133400CC  |
| chr13 | 1.12E+08 | 1.12E+08 | Intergenic Intergenic | -45698  | NM_17259  | 218613 | Mier3      | 5730509D1  |
| chr7  | 28474177 | 28474250 | promoter-1promoter-1  | -146    | NM_00111  | 112415 | C030039L0- |            |
| chr2  | 53050877 | 53050975 | promoter-1promoter-1  | -192    | NM_02298  | 65103  | Arl6ip6    | 2310057CC  |
| chr14 | 56279127 | 56279200 | intron (NM CpG        | 182     | NM_02339  | 67881  | Mdp1       | 1810034K2  |
| chr17 | 46918602 | 46920150 | intron (NM intron (NM | 229     | NM_02543  | 66229  | Rpl7l1     | 1500016H1  |
| chr1  | 1.34E+08 | 1.34E+08 | exon (NM_ exon (NM_   | 158     | NM_17251  | 213452 | Dstyk      | A930019K2  |
| chr17 | 27341252 | 27341325 | promoter-1promoter-1  | 95      | NM_14607  | 224640 | Lemd2      | BC026588   |
| chr5  | 74368602 | 74368875 | Intergenic Intergenic | 95698   | NM_17756  | 69727  | Usp46      | 1190009E2  |
| chr12 | 33420077 | 33420300 | Intergenic Intergenic | -85012  | NM_02152  | 59027  | Nampt      | 1110035O1  |
| chr3  | 50239752 | 50239925 | intron (NM intron (NM | 7697    | NM_01199  | 26570  | Slc7a11    | 9930009M   |
| chr15 | 81230352 | 81230550 | promoter-1promoter-1  | -167    | NM_17731  | 321003 | Xpnpep3    | APP3 E43C  |
| chr14 | 31005577 | 31005650 | intron (NML1MEc LIN   | 161059  | NM_00108  | 12289  | Cacna1d    | 8430418G1  |
| chr4  | 1.06E+08 | 1.06E+08 | promoter-1promoter-1  | -130    | NM_05327  | 74754  | Dhcr24     | 2310076D1  |
| chr11 | 1.03E+08 | 1.03E+08 | intron (NM intron (NM | 4864    | NM_01689  | 53859  | Map3k14    | Nik aly    |
| chr1  | 1.82E+08 | 1.82E+08 | Intergenic Intergenic | -22380  | NM_02637  | 226747 | Ahctf1     | 6230412P2  |
| chr12 | 16818352 | 16818575 | intron (NM intron (NM | 692     | NM_03327  | 50496  | E2f6       | AI462434   |
| chr19 | 5609777  | 5609875  | promoter-1promoter-1  | -119    | NR_037603 | 81601  | Kat5       | AI839539 I |
| chr6  | 1.16E+08 | 1.16E+08 | intron (NM intron (NM | -23119  | NM_14538  | 212541 | Rho        | Noerg1 Oq  |
| chr5  | 96638977 | 96639300 | promoter-1promoter-1  | 4       | NM_05315  | 94061  | Mrpl1      | 2410002L0  |
| chr4  | 33064052 | 33064175 | Intergenic Intergenic | -5860   | NM_02749  | 52187  | Rragd      | 5730543CC  |
| chr4  | 61944152 | 61944525 | Intergenic Intergenic | -3125   | NM_02528  | 20530  | Slc31a2    | AI604396 I |
| chr17 | 21082202 | 21082500 | promoter-1promoter-1  | -67     | NM_01689  | 51792  | Ppp2r1a    | 6330556D2  |
| chr14 | 60216552 | 60216850 | promoter-1promoter-1  | 95      | NM_00116  | 71891  | Cdadc1     | 2310010M   |
| chr14 | 66424577 | 66424850 | promoter-1promoter-1  | -35     | NM_02320  | 52033  | Pbk        | 2810434B1  |
| chr1  | 55109152 | 55109400 | promoter-1promoter-1  | -338    | NM_02642  | 67876  | Coq10b     | 1500041J0  |
| chr17 | 74242677 | 74242900 | intron (NM intron (NM | 56748   | NM_01172  | 22436  | Xdh        | XO Xor Xo  |
| chr9  | 24999877 | 25000200 | Intergenic RLTR12B L  | -43758  | NM_02058  | 80517  | Herpud2    | 5031400M   |
| chr15 | 58849602 | 58849675 | intron (NM intron (NM | 63943   | NM_00114  | 211401 | Mtss1      | 2310003N1  |
| chr16 | 49770427 | 49770775 | Intergenic Intergenic | 71194   | NM_02868  | 73916  | lft57      | 4833420A1  |
| chr13 | 16990027 | 16990200 | intron (NM intron (NM | 796486  | NM_13865  | 192136 | Sugct      | 5033411D1  |
| chr7  | 29157177 | 29157300 | 5' UTR (NV 5' UTR (NV | 443     | NM_13875  | 101497 | Plekhg2    | AI194308 I |
| chr4  | 8574352  | 8574625  | Intergenic CpG        | -43065  | NM_00127  | 320790 | Chd7       | A730019I0  |
| chr10 | 64438727 | 64438850 | intron (NM intron (NM | -885785 | NM_17867  | 216028 | Lrrtm3     | 9630044HC  |
| chr7  | 38892352 | 38892425 | 5' UTR (NV 5' UTR (NV | 121     | NM_00763  | 12447  | Ccne1      | AW538188   |
| chr6  | 72339952 | 72340025 | intron (NM intron (NM | 673     | NM_01679  | 22320  | Vamp8      | AU041171   |

|       |          |          |             |            |         |           |        |            |             |
|-------|----------|----------|-------------|------------|---------|-----------|--------|------------|-------------|
| chr1  | 1.27E+08 | 1.27E+08 | Intergenic  | Intergenic | 89953   | NM_02373  | 74117  | Actr3      | 1200003AC   |
| chr11 | 1.05E+08 | 1.05E+08 | intron (NM  | intron (NM | 19178   | NM_00862  | 17534  | Mrc2       | Endo180 n   |
| chr8  | 1.26E+08 | 1.26E+08 | intron (NM  | intron (NM | 6827    | NM_00128  | 66855  | Tcf25      | 1100001J1   |
| chr10 | 1.11E+08 | 1.11E+08 | Intergenic  | MIR SINE   | -37232  | NM_00100  | 237542 | Osbp18     | AA536976    |
| chr6  | 1.21E+08 | 1.21E+08 | Intergenic  | Intergenic | -3102   | NM_13366  | 14411  | Slc6a12    | BGT1 GAT:   |
| chr5  | 1.4E+08  | 1.4E+08  | intron (NM  | intron (NM | 797     | NM_17700  | 319772 | C1300500:- |             |
| chr5  | 52581302 | 52581675 | promoter-1  | promoter-1 | 297     | NM_00104  | 13204  | Dhx15      | DBP1 DEAI   |
| chr1  | 39636127 | 39636225 | Intergenic  | Intergenic | -1984   | NM_00103  | 67702  | Rnf149     | 1600023E1   |
| chr11 | 1.16E+08 | 1.16E+08 | promoter-1  | promoter-1 | -229    | NM_01572  | 11430  | Acox1      | AOX Acox    |
| chr6  | 52752127 | 52752350 | intron (NM  | intron (NM | 88515   | NM_02581  | 52440  | Tax1bp1    | 1200003J1   |
| chrX  | 7667677  | 7667850  | promoter-1  | promoter-1 | -146    | NM_00951  | 22376  | Was        | U42471 W    |
| chr1  | 1.63E+08 | 1.63E+08 | Intergenic  | Intergenic | -12287  | NM_18339  | 240873 | Tnfsf18    | Gitrl       |
| chr16 | 56075752 | 56075875 | intron (NM  | CpG        | 291     | NM_00100  | 66315  | Senp7      | 2410152H1   |
| chr6  | 54485502 | 54485675 | intron (NM  | intron (NM | 30788   | NM_02726  | 69938  | Scrn1      | 2810019K2   |
| chr3  | 10278152 | 10278300 | intron (NM  | intron (NM | 22957   | NM_02931  | 75497  | Fabp12     | 1700008G0   |
| chr11 | 1.21E+08 | 1.21E+08 | promoter-1  | promoter-1 | 159     | NM_14537  | 209318 | Gps1       | Cops1 Csn   |
| chr7  | 1.4E+08  | 1.4E+08  | promoter-1  | promoter-1 | -797    | NM_00998  | 13017  | Ctbp2      | AA407280    |
| chr6  | 52167202 | 52167275 | exon (NM_   | exon (NM_  | 1334    | NM_01045  | 15404  | Hoxa7      | AV118143    |
| chr16 | 10607827 | 10608000 | intron (NM  | intron (NM | 62481   | NM_00120  | 74374  | Clec16a    | 4932416N1   |
| chr3  | 21890877 | 21890975 | Intergenic  | Intergenic | -84648  | NM_03073  | 81004  | Tbl1xr1    | 8030499HC   |
| chr16 | 32177102 | 32177300 | Intergenic  | Intergenic | -2685   | NM_00103  | 328660 | Bex6       | B020003O0   |
| chr6  | 71221927 | 71222125 | promoter-1  | promoter-1 | 13      | NM_14556  | 57896  | Krcc1      | AA792894    |
| chr5  | 1.43E+08 | 1.43E+08 | exon (NM_   | exon (NM_  | 238     | NM_17839  | 74781  | Wipi2      | 1110018O0   |
| chr15 | 59464752 | 59464900 | Intergenic  | B1F1 SINE  | -15383  | NM_14454  | 211770 | Trib1      | A5300900:   |
| chr5  | 20637177 | 20637375 | Intergenic  | Intergenic | -54809  | NM_17543  | 212167 | Gsap       | A530088I0   |
| chr4  | 1.47E+08 | 1.47E+08 | intron (NM  | intron (NM | -121248 | NM_00101  | 433804 | Gm13154    | OTTMUSG0    |
| chr2  | 30093302 | 30093400 | promoter-1  | promoter-1 | 62      | NM_17772  | 241296 | Lrrc8a     | Lrrc8 mKIA  |
| chr1  | 23853627 | 23853775 | 3' UTR (NV  | 3' UTR (NV | 62874   | NR_11097: | 98366  | Smap1      | 1700056O1   |
| chr9  | 63868127 | 63868275 | exon (NM_   | exon (NM_  | 1665    | NM_00854  | 17130  | Smad6      | Madh6 b2    |
| chr13 | 48721277 | 48721375 | promoter-1  | promoter-1 | -384    | NM_20723  | 218232 | Ptpdc1     | AI843923 ,  |
| chr4  | 1.36E+08 | 1.36E+08 | intron (NM  | intron (NM | 5592    | NM_17773  | 242705 | E2f2       | 9230110J1   |
| chr16 | 32501577 | 32501900 | intron (NML | 1ME3 LIN   | 5371    | NM_19930  | 245308 | Zdhhc19    | Gm1744 G    |
| chr6  | 30499652 | 30499850 | intron (NM  | intron (NM | 8109    | NM_00102  | 232680 | Cpa2       | -           |
| chr1  | 97371427 | 97371750 | Intergenic  | Lx9 LINE L | 161383  | NM_02632  | 67698  | Fam174a    | 2310044D2   |
| chr7  | 1.29E+08 | 1.29E+08 | promoter-1  | promoter-1 | 46      | NM_02160  | 59288  | Dctn5      | 4930427E1   |
| chr1  | 1.01E+08 | 1.01E+08 | Intergenic  | Intergenic | 372362  | NM_02758  | 70866  | Slco6d1    | 492151110!  |
| chr14 | 70553552 | 70553725 | promoter-1  | promoter-1 | -40     | NM_14605  | 219158 | Ccar2      | 2610301G1   |
| chr6  | 91666452 | 91666700 | intron (NMR | SINE1 SIN  | 32515   | NM_00932  | 21366  | Slc6a6     | AA589629    |
| chr8  | 41473802 | 41474050 | Intergenic  | Intergenic | -35243  | NM_17839  | 70546  | Zdhhc2     | 5730415PC   |
| chr1  | 20810052 | 20810325 | intron (NM  | CpG        | 106     | NM_00856  | 17215  | Mcm3       | AL033361    |
| chr15 | 97142402 | 97142600 | intron (NM  | intron (NM | -64783  | NM_00116  | 105827 | Amigo2     | AI415330 ,  |
| chr1  | 97469427 | 97469500 | Intergenic  | ORR1D2 L   | 94708   | NM_00918  | 20452  | St8sia4    | PST PST-1   |
| chr4  | 1.35E+08 | 1.35E+08 | Intergenic  | Lx5 LINE L | -3396   | NM_17485  | 242700 | Ifnlr1     | CRF2-12 II: |
| chr2  | 1.8E+08  | 1.8E+08  | promoter-1  | promoter-1 | 78      | NM_00108  | 52856  | Mtg2       | 1810011P1   |
| chr13 | 23852027 | 23852175 | TTS (NM_1   | TTS (NM_1  | 1017    | NM_17819  | 326619 | Hist1h4a   | -           |
| chr15 | 77631777 | 77632000 | intron (NM  | intron (NM | 40717   | NM_02241  | 17886  | Myh9       | Fltn Myhn   |
| chr4  | 1.51E+08 | 1.51E+08 | intron (NM  | intron (NM | 47876   | NM_00108  | 100072 | Camta1     | 1810059M    |



|       |          |          |                       |         |          |        |            |            |
|-------|----------|----------|-----------------------|---------|----------|--------|------------|------------|
| chr9  | 64021027 | 64021150 | promoter-1promoter-1  | -106    | NM_02421 | 67891  | Rpl4       | 2010004J2  |
| chr19 | 43748702 | 43748850 | promoter-1promoter-1  | 595     | NM_14515 | 246696 | Slc25a28   | 2210403D1  |
| chr2  | 11466427 | 11466575 | intron (NM intron (NM | 9055    | NM_00117 | 170768 | Pfkfb3     | E330010H2  |
| chr2  | 90585977 | 90586175 | intron (NM CpG        | 549     | NM_01882 | 55935  | Fnbp4      | FBP30 Fnb  |
| chr17 | 30141527 | 30141600 | promoter-1promoter-1  | -469    | NM_14892 | 21769  | Zfand3     | AW539211   |
| chr7  | 31347977 | 31348125 | promoter-1promoter-1  | 152     | NM_02549 | 66340  | Psenen     | 1700023M   |
| chr11 | 79072202 | 79072425 | Intergenic Intergenic | -4116   | NM_01965 | 78889  | Wsb1       | 1110056B1  |
| chr14 | 31638802 | 31638975 | 5' UTR (NM 5' UTR (NM | 108     | NM_02883 | 69179  | Tmem110    | 1810038NC  |
| chr17 | 26011952 | 26012075 | promoter-1promoter-1  | -432    | NM_02668 | 68347  | 0610011F0- |            |
| chr1  | 16655502 | 16655775 | intron (NM CpG        | 366     | NM_02639 | 70397  | Tmem70     | 1110020AC  |
| chr18 | 21118952 | 21119175 | intron (NMB1_Mus1 :   | 15937   | NM_02630 | 67664  | Rnf125     | 4930553F0  |
| chr12 | 13103877 | 13104100 | Intergenic Intergenic | 151992  | NM_13404 | 104721 | Ddx1       | AA409185   |
| chr15 | 58247452 | 58247700 | intron (NM intron (NM | 553     | NM_14595 | 210998 | D15Ertd62  | AV220772   |
| chr13 | 1.05E+08 | 1.05E+08 | Intergenic Intergenic | -1790   | NM_00108 | 108154 | Adamts6    | 5031426K1  |
| chr11 | 1.03E+08 | 1.03E+08 | intron (NM intron (NM | 4011    | NM_01967 | 57778  | Fmnl1      | 8030453N1  |
| chr19 | 57857277 | 57857450 | intron (NM intron (NM | 171839  | NM_18141 | 226255 | Atrnl1     | AI504415 , |
| chr12 | 76072252 | 76072425 | intron (NML1M2 LINE   | 205981  | NM_17280 | 238271 | Kcnh5      | Eag2       |
| chr12 | 92648727 | 92649025 | intron (NM intron (NM | 9443    | NM_01164 | 22095  | Tshr       | AI481368   |
| chr1  | 60860877 | 60861050 | Intergenic URR1A DN   | 57731   | NM_00764 | 12487  | Cd28       | -          |
| chr16 | 24193527 | 24194125 | Intergenic Intergenic | -199610 | NM_17866 | 210126 | Lpp        | 9430020K1  |
| chr9  | 44226252 | 44226375 | promoter-1promoter-1  | -223    | NM_20137 | 382073 | Ccdc84     | D630044F2  |
| chr6  | 1.35E+08 | 1.35E+08 | intron (NM intron (NM | 1045    | NM_01354 | 15199  | Hebp1      | Hebp       |
| chr1  | 1.59E+08 | 1.59E+08 | Intergenic B1F SINE , | -56806  | NM_02388 | 78255  | Ralgps2    | 1810020P1  |
| chr11 | 54698202 | 54698600 | Intergenic Intergenic | -17955  | NM_00816 | 14778  | Gpx3       | AA960521   |
| chr11 | 1.02E+08 | 1.02E+08 | intron (NM intron (NM | 25598   | NM_00881 | 18612  | Etv4       | AW414408   |
| chr5  | 64265902 | 64266050 | intron (NM intron (NM | 62242   | NM_02955 | 76261  | 0610040J0  | AI662686   |
| chr18 | 60661027 | 60661350 | 5' UTR (NM 5' UTR (NM | 449     | NM_13413 | 106878 | Smim3      | 2010002NC  |
| chr6  | 1.34E+08 | 1.34E+08 | intron (NM intron (NM | 136313  | NM_00796 | 14011  | Etv6       | AW123102   |
| chr5  | 1.15E+08 | 1.15E+08 | promoter-1promoter-1  | -295    | NM_02901 | 74585  | Sppl3      | 4833416I0! |
| chr9  | 1.02E+08 | 1.02E+08 | intron (NM intron (NM | 29633   | NM_02429 | 16716  | Ky         | CD1 D9Mg   |
| chr8  | 83262452 | 83262725 | intron (NM CpG        | 770     | NM_05312 | 93762  | Smarca5    | 4933427E2  |
| chr19 | 25041552 | 25041925 | Intergenic Intergenic | -5632   | NM_14609 | 226043 | Cbwd1      | AV349248   |
| chr17 | 46010277 | 46010700 | Intergenic Intergenic | -139695 | NM_02816 | 72240  | 1600014C2- |            |
| chr10 | 36930127 | 36930275 | Intergenic MTC LTR I  | -71469  | NM_00853 | 17118  | Marcks     | Macs PKCS  |
| chr1  | 1.83E+08 | 1.83E+08 | Intergenic Intergenic | -45654  | NM_14551 | 226757 | Wdr26      | 1600024AC  |
| chr4  | 90971177 | 90971400 | intron (NM intron (NM | 67458   | NM_01048 | 15569  | Elavl2     | Hub mel-N  |
| chr10 | 1.28E+08 | 1.28E+08 | exon (NM_ exon (NM_   | 1892    | NM_00108 | 210582 | Coq10a     | Gm1        |
| chr17 | 29401802 | 29401900 | promoter-1promoter-1  | -935    | NM_02684 | 68816  | Ppil1      | 1110060O1  |
| chr11 | 6100277  | 6100400  | 5' UTR (NM 5' UTR (NM | 116     | NM_17374 | 209586 | Nudcd3     | AI427847   |
| chr13 | 1.1E+08  | 1.1E+08  | intron (NM intron (NM | 111967  | NM_01105 | 238871 | Pde4d      | 9630011N2  |
| chr2  | 1.28E+08 | 1.28E+08 | intron (NM intron (NM | 28701   | NM_01690 | 53885  | Nphp1      | -          |
| chr19 | 53675027 | 53675300 | intron (NM CpG        | 277     | NM_00779 | 13006  | Smc3       | Bamacan C  |
| chr19 | 37449977 | 37450100 | promoter-1promoter-1  | -855    | NM_01061 | 16551  | Kif11      | Eg5 Kif8 K |
| chr16 | 44794627 | 44794725 | 3' UTR (NM 3' UTR (NM | -26165  | NM_20724 | 239849 | Cd200r4    | F630107NC  |
| chr15 | 81353802 | 81353950 | Intergenic Intergenic | 57130   | NM_01971 | 56438  | Rbx1       | 1500002P1  |
| chr9  | 65194627 | 65194775 | exon (NM_ exon (NM_   | 826     | NM_01668 | 50996  | Pdcd7      | C80112 ES  |
| chr16 | 52295752 | 52296000 | intron (NM intron (NM | 157234  | NM_00965 | 11658  | Alcam      | AI853494   |

|       |          |          |            |            |         |          |        |         |            |
|-------|----------|----------|------------|------------|---------|----------|--------|---------|------------|
| chr16 | 49859127 | 49859350 | intron (NM | intron (NM | 3471    | NM_01058 | 16423  | Cd47    | 9130415E2  |
| chr16 | 30587902 | 30588275 | promoter-1 | promoter-1 | -413    | NM_17806 | 224092 | Lsg1    | 583046512  |
| chr2  | 38499077 | 38499300 | intron (NM | intron (NM | 238     | NM_01118 | 19177  | Psmb7   | AU020723   |
| chr15 | 81641427 | 81641625 | promoter-1 | promoter-1 | -318    | NM_01737 | 21685  | Tef     | 2310028D2  |
| chr16 | 75293377 | 75293525 | Intergenic | Intergenic | 292855  | NM_00125 | 320355 | Lipi    | D930038D   |
| chr13 | 1.09E+08 | 1.09E+08 | intron (NM | intron (NM | 58582   | NM_14545 | 67263  | Zswim6  | 2900036G   |
| chr11 | 1.02E+08 | 1.02E+08 | intron (NM | CpG        | 184     | NM_00115 | 237943 | Gpatch8 | 5430405G2  |
| chr7  | 65942427 | 65942500 | intron (NM | intron (NM | 28891   | NM_00972 | 11982  | Atp10a  | Atp10c pfa |
| chr1  | 66748852 | 66748975 | intron (NM | intron (NM | 1446    | NM_02568 | 66646  | Rpe     | 2810429BC  |
| chr16 | 35900702 | 35900825 | Intergenic | Intergenic | -29295  | NM_00103 | 547253 | Parp14  | 1600029O1  |
| chr16 | 32608802 | 32608875 | promoter-1 | promoter-1 | -144    | NM_01163 | 22042  | Tfrc    | 2610028K1  |
| chr14 | 99498352 | 99498525 | promoter-1 | promoter-1 | -205    | NM_02932 | 52023  | Pibf1   | -          |
| chr17 | 35300352 | 35300450 | intron (NM | intron (NM | 1421    | NM_00119 | 53761  | Prrc2a  | 3110039BC  |
| chr14 | 45661002 | 45661425 | Intergenic | MLT1D LTI  | 53427   | NM_00896 | 19217  | Ptger2  | EP2 Ptgerc |
| chr11 | 22890102 | 22891875 | intron (NM | CpG        | 395     | NM_00983 | 12464  | Cct4    | 2610204B2  |
| chr16 | 64873477 | 64873800 | Intergenic | Intergenic | 21727   | NM_17864 | 106143 | Cggbp1  | AA960172   |
| chr7  | 76244752 | 76244925 | Intergenic | Intergenic | -350714 | NM_02554 | 66412  | Arrdc4  | 2410003CC  |
| chr1  | 1.58E+08 | 1.58E+08 | TTS (NM_0  | TTS (NM_0  | -31447  | NM_00102 | 104009 | Qsox1   | 1300003HC  |
| chr1  | 1.35E+08 | 1.35E+08 | 5' UTR (NV | 5' UTR (NV | 187     | NM_00109 | 240752 | Pik3c2b | C330011J1  |
| chr3  | 58380677 | 58380900 | exon (NM_  | exon (NM_  | 208     | NM_00104 | 69227  | Selt    | 2810407CC  |
| chr5  | 12639652 | 12639825 | Intergenic | L1MA8 LIN  | 256572  | NM_02888 | 108151 | Sema3d  | 4631426B1  |
| chr18 | 39829302 | 39829475 | Intergenic | Intergenic | -103763 | NM_01103 | 18459  | Pabpc2  | Pabp Pabp  |
| chr18 | 9731977  | 9732175  | intron (NM | intron (NM | 24430   | NM_13044 | 140792 | Colec12 | CL-P1 SRCI |
| chr5  | 23606427 | 23606525 | promoter-1 | promoter-1 | 68      | NM_02644 | 52323  | Klhl7   | 2700038BC  |
| chr10 | 23869177 | 23869475 | 5' UTR (NV | 5' UTR (NV | 203     | NM_01679 | 53331  | Stx7    | AI315064 , |
| chr9  | 62211627 | 62211800 | intron (NM | CpG        | 22563   | NM_00967 | 11737  | Anp32a  | Anp32 l1P  |
| chr16 | 52454027 | 52454100 | promoter-1 | promoter-1 | -953    | NM_00965 | 11658  | Alcam   | AI853494 l |
| chr11 | 98657227 | 98657350 | exon (NM_  | exon (NM_  | 205     | NM_02872 | 74026  | Msl1    | 2810017F1  |
| chr9  | 45763277 | 45763425 | promoter-1 | promoter-1 | -19     | NM_00128 | 214597 | Sidt2   | B930096O:  |
| chr15 | 76531952 | 76532225 | 5' UTR (NV | 5' UTR (NV | 116     | NM_02712 | 69572  | Mfsd3   | 2310010G1  |
| chr6  | 21975552 | 21975650 | intron (NM | intron (NM | 39691   | NM_00108 | 214642 | Cped1   | 6720481PC  |
| chr6  | 16680877 | 16680975 | Intergenic | Intergenic | 167515  | NM_03119 | 21426  | Tfec    | BB107417   |
| chr12 | 71086702 | 71086775 | intron (NM | MIRb SINE  | 1251    | NM_02202 | 64010  | Sav1    | 1700040G   |
| chr12 | 71814377 | 71814650 | Intergenic | Intergenic | -111988 | NM_02812 | 319710 | Frmd6   | 2610019M   |
| chr7  | 1.33E+08 | 1.33E+08 | intron (NM | intron (NM | 1192    | NM_02984 | 77035  | Kdm8    | 3110005O2  |
| chr10 | 87967227 | 87967600 | promoter-1 | promoter-1 | -698    | NM_00114 | 212862 | Chpt1   | -          |
| chr12 | 1.07E+08 | 1.07E+08 | promoter-1 | promoter-1 | 375     | NM_02965 | 76559  | Atg2b   | 2410024A2  |
| chr9  | 74867152 | 74867225 | intron (NM | intron (NM | -18233  | NM_00114 | 59046  | Arpp19  | 19kDa 270  |
| chr9  | 26918602 | 26918700 | intron (NM | intron (NM | 44355   | NM_02327 | 83964  | Jam3    | 1110002N2  |
| chr2  | 1.64E+08 | 1.64E+08 | Intergenic | MER21B L   | 24538   | NM_13377 | 78928  | Pigt    | 2510012P1  |
| chr15 | 63832277 | 63832375 | intron (NM | intron (NM | 59684   | NM_14484 | 223601 | Fam49b  | 0910001AC  |
| chr16 | 55966052 | 55967725 | intron (NM | intron (NM | 500     | NM_02421 | 68193  | Rpl24   | 0610008L0  |
| chr15 | 77705452 | 77705575 | Intergenic | Intergenic | -32908  | NM_02241 | 17886  | Myh9    | Fltn Myhn  |
| chr10 | 42622727 | 42622975 | intron (NM | intron (NM | 42533   | NM_17293 | 268297 | Scml4   | 9330161D1  |
| chr4  | 84191602 | 84191875 | intron (NM | intron (NM | 129252  | NM_17287 | 242509 | Bnc2    | 5031434M   |
| chr14 | 87590602 | 87590750 | Intergenic | Intergenic | -49755  | NM_01967 | 56419  | Diap3   | 4930417P1  |
| chr14 | 9004477  | 9004675  | intron (NM | intron (NM | 930     | NM_02422 | 68263  | Pdhh    | 2610103L0  |

|       |          |          |            |            |         |          |        |          |            |
|-------|----------|----------|------------|------------|---------|----------|--------|----------|------------|
| chr17 | 8755627  | 8755750  | intron (NM | intron (NM | 36022   | NM_00129 | 23984  | Pde10a   | -          |
| chr7  | 1.49E+08 | 1.49E+08 | promoter-1 | promoter-1 | -91     | NM_00125 | 64540  | Tspan4   | AI325509   |
| chr19 | 5575627  | 5575900  | Intergenic | ETnERV-int | 7689    | NM_00103 | 381201 | Ap5b1    | Gm962      |
| chr2  | 25118877 | 25118975 | exon (NM_  | exon (NM_  | 808     | NM_17528 | 97031  | Tprn     | C430004E1  |
| chr10 | 1.11E+08 | 1.11E+08 | intron (NM | intron (NM | 569     | NM_02860 | 73690  | Glpr1    | 24101140   |
| chr17 | 46908902 | 46909000 | promoter-1 | promoter-1 | -633    | NM_02596 | 67101  | 2310039H | C-         |
| chr11 | 69392952 | 69393200 | promoter-1 | promoter-1 | -250    | NM_14482 | 216853 | Wrap53   | BC021790   |
| chr5  | 34979227 | 34979325 | exon (NM_  | exon (NM_  | 487     | NM_02666 | 68294  | Mfsd10   | 06100090   |
| chr2  | 32426452 | 32426550 | intron (NM | intron (NM | 123     | NM_01007 | 13481  | Dpm2     | AW557993   |
| chr1  | 59727002 | 59727150 | intron (NM | intron (NM | 602     | NM_00946 | 22218  | Sumo1    | GMP1 PIC:  |
| chr5  | 1.23E+08 | 1.23E+08 | intron (NM | CpG        | 483     | NM_01391 | 30841  | Kdm2b    | Cxxc2 E43  |
| chr8  | 1.26E+08 | 1.26E+08 | promoter-1 | promoter-1 | 618     | NM_02049 | 57247  | Zfp276   | AW048709   |
| chr17 | 9049252  | 9049400  | intron (NM | intron (NM | 54716   | NM_01186 | 23984  | Pde10a   | -          |
| chr16 | 4674002  | 4674150  | intron (NM | intron (NM | 5644    | NM_03020 | 78885  | Coro7    | 0610011B1  |
| chr9  | 22271902 | 22272000 | intron (NM | (CA)n Sim  | 849     | NM_01873 | 55934  | Rp9      | PAP-1 Rp9  |
| chr4  | 93001702 | 93002125 | exon (NM_  | exon (NM_  | 289     | NM_02695 | 69136  | Tusc1    | 2200001D1  |
| chr2  | 75569177 | 75569450 | Intergenic | Intergenic | -26615  | NM_01090 | 18024  | Nfe2l2   | AI194320   |
| chr14 | 78304302 | 78304400 | exon (NM_  | exon (NM_  | 305     | NM_02949 | 108670 | Epsti1   | 2310046K1  |
| chr8  | 1.1E+08  | 1.1E+08  | Intergenic | ORR1E LTF  | -4298   | NM_02555 | 66427  | Cyb5b    | 1810044O2  |
| chr17 | 56148152 | 56148375 | promoter-1 | promoter-1 | -361    | NM_02653 | 68047  | Mpnd     | E130307M   |
| chr2  | 76485827 | 76485975 | exon (NM_  | exon (NM_  | 150     | NM_01187 | 23992  | Prkra    | AV120107   |
| chr12 | 87027627 | 87027700 | promoter-1 | promoter-1 | -7      | NM_01676 | 53314  | Batf     | B-ATF SFA  |
| chr1  | 13583427 | 13583600 | Intergenic | ORR1D2 L   | -3568   | NM_02817 | 72265  | Tram1    | 1810049E0  |
| chr3  | 67177902 | 67178125 | promoter-1 | promoter-1 | -6      | NM_01080 | 17349  | Mlf1     | HLS7       |
| chr3  | 96808502 | 96808725 | Intergenic | Intergenic | -27712  | NM_00127 | 14613  | Gja5     | 5730555N1  |
| chr8  | 91218277 | 91218375 | Intergenic | Intergenic | -2601   | NM_00112 | 74256  | Cyld     | 2010013M   |
| chr19 | 46297752 | 46297900 | intron (NM | intron (NM | 70778   | NM_17893 | 107338 | Gbf1     | 1700083E0  |
| chr18 | 77985852 | 77986025 | Intergenic | MuRRS4-in  | 20581   | NM_14608 | 225745 | Haus1    | BC024400   |
| chr2  | 1.56E+08 | 1.56E+08 | promoter-1 | promoter-1 | 89      | NM_02025 | 19018  | Scand1   | 2310003H2  |
| chr5  | 53843202 | 53843500 | Intergenic | RSINE1 SIN | -103667 | NM_00108 | 19664  | Rbpj     | AI843960   |
| chr4  | 19496602 | 19496675 | intron (NM | intron (NM | 613     | NM_02776 | 70568  | Cpne3    | 5430428M   |
| chr4  | 1.25E+08 | 1.25E+08 | promoter-1 | promoter-1 | -249    | NM_17524 | 76793  | Snip1    | 2410133M   |
| chr4  | 1.52E+08 | 1.52E+08 | Intergenic | Intergenic | -1935   | NM_20768 | 56226  | Espn     | je         |
| chr10 | 5733652  | 5733875  | intron (NM | intron (NM | 732     | NM_00795 | 13982  | Esr1     | AA420328   |
| chr4  | 46151677 | 46151850 | promoter-1 | promoter-1 | 380     | NM_00103 | 433702 | Ncbp1    | AU014645   |
| chr6  | 1.29E+08 | 1.29E+08 | intron (NM | intron (NM | 2726    | NM_00108 | 330428 | Tmem52b  | D630042F2  |
| chr9  | 1.05E+08 | 1.05E+08 | intron (NM | intron (NM | 36075   | NM_17502 | 235574 | Atp2c1   | 1700121J1  |
| chr16 | 36210077 | 36210400 | promoter-1 | promoter-1 | -251    | NM_00108 | 408196 | Gm5416   | EG408196   |
| chr11 | 4968477  | 4968675  | Intergenic | PB1D9 SIN  | -3246   | NM_00119 | 78926  | Gas2l1   | 4930500E2  |
| chr8  | 95478027 | 95478200 | Intergenic | Intergenic | -6833   | NM_00920 | 20538  | Slc6a2   | NE-T NET   |
| chr2  | 35991952 | 35992050 | promoter-1 | promoter-1 | 83      | NM_02642 | 67871  | Mrrf     | 2400002D   |
| chr1  | 88295802 | 88296150 | Intergenic | (CA)n Sim  | -11260  | NM_01034 | 14767  | Nmur1    | FM-3 Gpr   |
| chr13 | 95558927 | 95559000 | promoter-1 | promoter-1 | 65      | NM_00932 | 21371  | Tbca     | Tbca13     |
| chr2  | 22662902 | 22663025 | intron (NM | intron (NM | 33116   | NM_01945 | 54519  | Apbb1ip  | 9930118P   |
| chr1  | 72560452 | 72560600 | intron (NM | intron (NM | 22612   | NM_00104 | 381270 | 4-Mar    | BC056494   |
| chrX  | 70473402 | 70473550 | promoter-1 | promoter-1 | -169    | NM_00797 | 14070  | F8a      | AI852759   |
| chr13 | 41528652 | 41528875 | intron (NM | ORR1C1 L1  | 53966   | NM_00111 | 18003  | Nedd9    | Cas-L CasL |

|       |          |          |                       |         |           |        |           |             |
|-------|----------|----------|-----------------------|---------|-----------|--------|-----------|-------------|
| chr7  | 4453427  | 4453575  | promoter-1promoter-1  | -219    | NM_02983  | 232807 | Ppp1r12c  | 2410197A1   |
| chr6  | 30497952 | 30498100 | intron (NM intron (NM | 6384    | NM_00102  | 232680 | Cpa2      | -           |
| chr7  | 1.39E+08 | 1.39E+08 | promoter-1promoter-1  | -251    | NM_02665  | 68277  | 2310057M  | 3110040E1   |
| chr6  | 49299852 | 49300250 | Intergenic MLT1E1 LT  | -17687  | NM_00117  | 231946 | Fam221a   | D330028D:   |
| chr1  | 1.45E+08 | 1.45E+08 | Intergenic Lx8 LINE L | -589964 | NM_02002  | 26878  | B3galt2   | -           |
| chr1  | 1.58E+08 | 1.58E+08 | intron (NM intron (NM | 185     | NM_02232  | 240832 | Tor1aip2  | 1110020D1   |
| chr4  | 1.17E+08 | 1.17E+08 | promoter-1promoter-1  | -6      | NM_00102  | 74464  | Zswim5    | 4933426E2   |
| chr6  | 1.23E+08 | 1.23E+08 | intron (NM MLT1H LTI  | 3142    | NM_00117  | 26888  | Clec4a2   | Clec4a Cle  |
| chr4  | 1.48E+08 | 1.48E+08 | intron (NM CpG        | 692     | NR_027864 | 230908 | Tardbp    | 1190002A2   |
| chr2  | 1.7E+08  | 1.7E+08  | Intergenic Intergenic | -52913  | NM_00115  | 228913 | Zfp217    | 4933431CC   |
| chr11 | 77990577 | 77990725 | promoter-1promoter-1  | -483    | NM_08084  | 140859 | Nek8      | 4632401F2   |
| chr17 | 27165252 | 27165400 | promoter-1promoter-1  | 245     | NM_00752  | 12018  | Bak1      | Bak N-BAK   |
| chr4  | 1.44E+08 | 1.44E+08 | promoter-1promoter-1  | -117    | NM_00117  | 20148  | Dhrs3     | Rsdr1 retS  |
| chr2  | 1.82E+08 | 1.82E+08 | promoter-1promoter-1  | -71     | NM_15359  | 245867 | Pcmt2     | 5330414D1   |
| chr7  | 1.24E+08 | 1.24E+08 | Intergenic Intergenic | -27845  | NM_00113  | 53322  | Nucb2     | AI607786    |
| chr7  | 1.09E+08 | 1.09E+08 | Intergenic L1MB2 LIN  | -7900   | NM_00928  | 20866  | Stim1     | SIM         |
| chr13 | 1.01E+08 | 1.01E+08 | Intergenic Intergenic | 135725  | NM_01373  | 27220  | Cartpt    | Cart        |
| chr11 | 48630577 | 48630750 | 5' UTR (NV 5' UTR (NV | 230     | NM_14537  | 211007 | Trim41    | AW552703    |
| chr2  | 1.78E+08 | 1.78E+08 | Intergenic RLTR45 LT  | -9738   | NM_00117  | 626848 | Etoh1     | -           |
| chr11 | 76211252 | 76211475 | intron (NM intron (NM | 1280    | NM_00875  | 18230  | Nxn       | l11Jus13    |
| chr2  | 1.66E+08 | 1.66E+08 | promoter-1promoter-1  | -260    | NM_00128  | 228880 | Zmynd8    | 1110013E2   |
| chr1  | 1.38E+08 | 1.38E+08 | intron (NM intron (NM | 3160    | NM_00103  | 16565  | Kif21b    | 2610511N2   |
| chrX  | 82786627 | 82786700 | Intergenic Intergenic | -32698  | NM_02572  | 66724  | Tab3      | 4921526GC   |
| chr13 | 55507027 | 55507125 | intron (NM intron (NM | 6067    | NM_01139  | 20505  | Slc34a1   | NaPi-Ila Np |
| chr17 | 56465477 | 56465750 | 5' UTR (NV 5' UTR (NV | 140     | NM_17213  | 193796 | Kdm4b     | 4732474L0   |
| chr5  | 1.11E+08 | 1.11E+08 | promoter-1promoter-1  | 188     | NM_01113  | 18973  | Pole      | -           |
| chr12 | 1.06E+08 | 1.06E+08 | Intergenic ETnERV2-ir | 25381   | NM_00119  | 628900 | Serpina3i | 2B2 EG62E   |
| chr5  | 1.26E+08 | 1.26E+08 | intron (NM CpG        | 155     | NM_20331  | 208144 | Dhx37     | Gm1050 G    |
| chr18 | 20901177 | 20901275 | intron (NMB1_Mur4 S   | 3679    | NM_01973  | 56386  | B4galt6   | AA536803    |
| chr17 | 71528127 | 71528275 | Intergenic Intergenic | -5117   | NM_02288  | 64898  | Lpin2     | 2610511GC   |
| chr4  | 1.41E+08 | 1.41E+08 | intron (NM CpG        | 159     | NM_02538  | 66147  | Necap2    | 1110005F0   |
| chr1  | 1.83E+08 | 1.83E+08 | promoter-1promoter-1  | -692    | NM_00821  | 15078  | H3f3a     | H3.3A       |
| chr1  | 92895602 | 92895875 | intron (NM intron (NM | 434     | NM_00111  | 16978  | Lrrfip1   | AU024550    |
| chr2  | 12656352 | 12656650 | Intergenic Intergenic | -189167 | NM_00896  | 19212  | Pter      | AI790318 I  |
| chr17 | 56754352 | 56754450 | TTS (NM_0 TTS (NM_0   | 1583    | NM_01873  | 54217  | Rpl36     | -           |
| chr10 | 90634102 | 90634300 | promoter-1promoter-1  | 163     | NM_00108  | 21917  | Tmpo      | 5630400D2   |
| chr1  | 91810277 | 91810475 | Intergenic Intergenic | 17375   | NM_01026  | 14472  | Gbx2      | D130058EC   |
| chr7  | 1.48E+08 | 1.48E+08 | promoter-1promoter-1  | 377     | NM_00113  | 15461  | Hras      | H-ras Ha-r  |
| chr3  | 1.31E+08 | 1.31E+08 | intron (NM intron (NM | 63318   | NM_00821  | 15107  | Hadh      | AA409008    |
| chr17 | 71835477 | 71835550 | Intergenic Intergenic | -10830  | NM_02888  | 74355  | Smchd1    | 4931400A1   |
| chr14 | 33015202 | 33015350 | promoter-1promoter-1  | 119     | NM_01196  | 26430  | Parg      | AI413217    |
| chr19 | 55390427 | 55391125 | promoter-1promoter-1  | 229     | NM_00129  | 53611  | Vti1a     | 1110014F1   |
| chr18 | 64929252 | 64929400 | Intergenic Intergenic | -108672 | NM_00100  | 54670  | Atp8b1    | AI451886 I  |
| chr11 | 49789927 | 49790150 | intron (NMB1F SINE ,  | -48795  | NM_02154  | 59044  | Rnf130    | G1RZFP G1   |
| chr2  | 1.29E+08 | 1.29E+08 | promoter-1promoter-1  | -421    | NM_01574  | 20515  | Slc20a1   | AI607883    |
| chr3  | 1.26E+08 | 1.26E+08 | promoter-1promoter-1  | 69      | NM_02381  | 108058 | Camk2d    | 2810011D2   |
| chr6  | 1.08E+08 | 1.08E+08 | intron (NM intron (NM | 386     | NM_01058  | 16438  | Itpr1     | D6Pas2 EN   |

|       |          |          |                       |         |          |        |           |              |
|-------|----------|----------|-----------------------|---------|----------|--------|-----------|--------------|
| chr5  | 1.09E+08 | 1.09E+08 | exon (NM_exon (NM_    | 112     | NM_19901 | 110524 | Dgkq      | 110kDa D/    |
| chr2  | 1.04E+08 | 1.04E+08 | intron (NM_intron (NM | -2601   | NM_00114 | 16909  | Lmo2      | Rbtn-2 Rbt   |
| chr5  | 31904702 | 31905025 | Intergenic Intergenic | -11461  | NM_02579 | 66845  | Mrpl33    | 0610009M     |
| chr17 | 71199827 | 71200350 | promoter-1promoter-1  | 462     | NM_00937 | 21815  | Tgif1     | AA959811     |
| chr16 | 25483627 | 25483700 | Intergenic Intergenic | 196760  | NM_17516 | 71338  | Tprg      | 5430420C1    |
| chr4  | 1.39E+08 | 1.39E+08 | Intergenic Intergenic | 15778   | NM_00129 | 69902  | Mrto4     | 261001202    |
| chr5  | 1.36E+08 | 1.36E+08 | Intergenic B2_Mm2 S   | -22233  | NM_00889 | 18984  | Por       | 4933424M     |
| chr1  | 1.55E+08 | 1.55E+08 | intron (NM_RLTR40 LT  | 18462   | NM_00103 | 71836  | Shcbp1l   | 1700012A1    |
| chr3  | 89380252 | 89380675 | intron (NM_intron (NM | 56377   | NM_08046 | 140493 | Kcnn3     | KCa2.3 SK3   |
| chr11 | 1.17E+08 | 1.17E+08 | intron (NM_intron (NM | -13903  | NM_01738 | 53860  | 9-Sep     | MSF1 Msf     |
| chr5  | 1.38E+08 | 1.38E+08 | promoter-1promoter-1  | -124    | NM_20137 | 384309 | Trim56    | A130009K1    |
| chr1  | 1.82E+08 | 1.82E+08 | promoter-1promoter-1  | -507    | NM_00103 | 226751 | Cdc42bpa  | A930014J1    |
| chr18 | 61383852 | 61384000 | intron (NM_intron (NM | 3773    | NM_14608 | 225600 | Pde6a     | Pdea nmf2    |
| chr2  | 1.35E+08 | 1.35E+08 | Intergenic Intergenic | -34019  | NM_02914 | 52837  | Tmx4      | 2810417DC    |
| chr14 | 56223652 | 56223775 | intron (NM_intron (NM | 297     | NM_00115 | 16391  | Irf9      | Irf-9 Isgf3g |
| chr6  | 90555002 | 90555075 | intron (NM_CpG        | 164     | NM_02786 | 71699  | Slc41a3   | 1010001PC    |
| chr13 | 59924252 | 59924400 | intron (NM_CpG        | 182     | NM_15353 | 214290 | Zcchc6    | 6030448M     |
| chr8  | 85966702 | 85966850 | promoter-1promoter-1  | -215    | NM_01970 | 56367  | Scoc      | 0610011CC    |
| chr1  | 74197702 | 74197975 | Intergenic MIR SINE   | -2730   | NM_00990 | 12765  | Cxcr2     | CD128 CD1    |
| chr7  | 29062627 | 29062775 | promoter-1promoter-1  | -24     | NM_00117 | 434156 | Eid2b     | 3010005CC    |
| chr2  | 26462727 | 26462875 | Intergenic Intergenic | -2864   | NM_02621 | 67512  | Agpat2    | 2510002JO    |
| chr13 | 38102602 | 38102800 | intron (NM_intron (NM | -16642  | NM_02596 | 107513 | Ssr1      | 2510001KC    |
| chr16 | 22282602 | 22282750 | Intergenic RLTR45 LT  | -16674  | NM_00918 | 20462  | Tra2b     | 5730405G2    |
| chr10 | 43160027 | 43160100 | TTS (NM_0 TTS (NM_0   | -38883  | NM_19902 | 331623 | Bend3     | mKIAA1553    |
| chr2  | 33742677 | 33742750 | intron (NM_CpG        | 753     | NM_17518 | 72543  | Mvb12b    | 261020001    |
| chr19 | 6118227  | 6118475  | exon (NM_exon (NM_    | 235     | NM_13367 | 66406  | Sac3d1    | 2410004C2    |
| chr12 | 58331452 | 58331700 | 5' UTR (NM_5' UTR (NM | 164     | NM_00116 | 73490  | Mipol1    | 1700081OC    |
| chr11 | 60351077 | 60351550 | 5' UTR (NM_5' UTR (NM | 128     | NM_17294 | 268420 | Alkbh5    | AW050020     |
| chr5  | 83647427 | 83647600 | Intergenic Lx2B LINE  | 136707  | NM_15380 | 243078 | Tecrl     | D330017N:    |
| chr1  | 1.35E+08 | 1.35E+08 | exon (NM_exon (NM_    | 1720    | NM_13381 | 108954 | Ppp1r15b  | 1810033K1    |
| chr16 | 44988852 | 44989425 | Intergenic Intergenic | 45347   | NM_00112 | 74603  | Cd200r3   | 473340111:   |
| chr1  | 39426077 | 39426225 | intron (NM_intron (NM | 1455    | NM_00125 | 114641 | Rpl31     | -            |
| chr3  | 60177602 | 60177900 | Intergenic L1M3 LINE  | -99001  | NM_00125 | 56758  | Mbnl1     | Mbnl mKI/    |
| chr2  | 1.8E+08  | 1.8E+08  | promoter-1promoter-1  | 293     | NM_00128 | 26444  | Psma7     | C6-I         |
| chr8  | 97631327 | 97631550 | intron (NM_intron (NM | 5804    | NM_00114 | 16582  | Kifc3     | AI325457 I   |
| chr6  | 22355127 | 22355225 | Intergenic PB1 SINE , | -49095  | NM_13858 | 27999  | Fam3c     | D6Wsu176     |
| chr4  | 87094377 | 87094525 | Intergenic Intergenic | -218007 | NM_17242 | 76376  | Slc24a2   | 2810021B1    |
| chr9  | 53910777 | 53910875 | intron (NM_intron (NM | 5392    | NM_00103 | 244882 | Tnfaip8l3 | 9930029PC    |
| chr6  | 50493602 | 50493700 | Intergenic L1MC5 LIN  | 22822   | NM_00780 | 13063  | Cycs      | -            |
| chr10 | 95403752 | 95403850 | intron (NM_CpG        | 504     | NM_00100 | 216238 | Eea1      | A430109M     |
| chr6  | 82772977 | 82773200 | Intergenic (CATG)n Si | -48640  | NM_01382 | 15277  | Hk2       | AI642394 I   |
| chr19 | 7280427  | 7280500  | intron (NM_GC_rich Lc | 311     | NM_13415 | 107260 | Otub1     | AI850305     |
| chr12 | 10397702 | 10397900 | TTS (NM_0 TTS (NM_0   | 215     | NM_02369 | 105014 | Rdh14     | 3110030G1    |
| chr2  | 28001577 | 28001775 | Intergenic RLTR16 LT  | -46937  | NM_00103 | 56177  | Olfm1     | AMY AW7.     |
| chr8  | 1.2E+08  | 1.2E+08  | Intergenic Intergenic | -9658   | NM_00829 | 15486  | Hsd17b2   | AI194836 ,   |
| chr10 | 7512552  | 7512825  | promoter-1promoter-1  | -4      | NM_02614 | 67418  | Ppil4     | 3732410E1    |
| chr2  | 1.53E+08 | 1.53E+08 | promoter-1promoter-1  | -211    | NM_13384 | 99237  | Tm9sf4    | AA986553     |

|       |          |          |            |            |        |           |        |           |            |
|-------|----------|----------|------------|------------|--------|-----------|--------|-----------|------------|
| chr10 | 92865802 | 92865975 | Intergenic | Intergenic | -50253 | NM_00851  | 16993  | Lta4h     | -          |
| chr15 | 88961852 | 88962050 | intron (NM | intron (NM | -2821  | NR_028449 | 170787 | Hdac10    | AW548891   |
| chr1  | 1.3E+08  | 1.3E+08  | promoter-1 | promoter-1 | 247    | NM_02839  | 72949  | Ccnt2     | 290004111  |
| chr3  | 1.31E+08 | 1.31E+08 | Intergenic | Intergenic | -85681 | NM_00128  | 23971  | Papss1    | AI325286   |
| chr9  | 1.23E+08 | 1.23E+08 | intron (NM | intron (NM | 26624  | NM_01160  | 21922  | Clec3b    | Tna        |
| chr6  | 1.15E+08 | 1.15E+08 | promoter-1 | promoter-1 | -258   | NM_01114  | 19016  | Pparg     | Nr1c3 PPA  |
| chr1  | 43973852 | 43974050 | Intergenic | Intergenic | -16901 | NM_00941  | 22019  | Tpp2      | TPP-2 Tpp1 |
| chr18 | 36868527 | 36868800 | Intergenic | MER44D D   | -13084 | NM_17283  | 240216 | E230025N2 | EG240216   |
| chr2  | 75445502 | 75445675 | Intergenic | (TG)n Sim  | -51728 | NM_14613  | 229279 | Hnrnpa3   | 2410013L1  |
| chr1  | 94935602 | 94935750 | exon (NM_  | exon (NM_  | 32765  | NM_00115  | 208760 | Aqp12     | AB084104   |
| chr15 | 88649552 | 88649625 | promoter-1 | promoter-1 | 160    | NM_00114  | 223774 | Alg12     | ECM39      |
| chr9  | 65974652 | 65974725 | exon (NM_  | exon (NM_  | 270    | NM_02663  | 68250  | Fam96a    | 5730536AC  |
| chr14 | 75684227 | 75684325 | promoter-1 | promoter-1 | 96     | NM_02608  | 67302  | Zc3h13    | 2600010B1  |
| chr19 | 5875427  | 5875500  | promoter-1 | promoter-1 | -255   | NM_02616  | 67457  | Frmd8     | 1200004M   |
| chr8  | 23303277 | 23303600 | exon (NM_  | exon (NM_  | 106    | NM_02733  | 70160  | Vps36     | 1700010A2  |
| chr5  | 1.44E+08 | 1.44E+08 | intron (NM | CpG        | 173    | NM_08056  | 108086 | Rnf216    | 2810055G2  |
| chr13 | 4152277  | 4152500  | Intergenic | L1M4 LINE  | -2511  | NM_13406  | 105349 | Akr1c18   | AW146047   |
| chr15 | 98702577 | 98702750 | Intergenic | CpG        | -1027  | NM_00103  | 381022 | Kmt2d     | ALR BC032  |
| chr9  | 55174402 | 55174475 | promoter-1 | promoter-1 | -318   | NM_17292  | 244886 | Al118078  | 9630029F1  |
| chr2  | 1.81E+08 | 1.81E+08 | intron (NM | intron (NM | 292    | NM_19931  | 332713 | BC051628  | 1700026M   |
| chr10 | 95079552 | 95079650 | Intergenic | Intergenic | -52800 | NM_02772  | 71207  | Nudt4     | 4933436C1  |
| chr4  | 11118477 | 11118600 | promoter-1 | promoter-1 | 40     | NM_00103  | 12448  | Ccne2     | -          |
| chrX  | 71696827 | 71697125 | 3' UTR (NV | 3' UTR (NV | 21956  | NM_01054  | 16151  | Ikbbk     | 1110037D2  |
| chr17 | 47653927 | 47654000 | intron (NM | intron (NM | 11963  | NM_00108  | 12445  | Ccnd3     | 9230106BC  |
| chr9  | 1.07E+08 | 1.07E+08 | intron (NM | CpG        | 119    | NM_01048  | 15587  | Hyal2     | AI256841   |
| chr18 | 44988102 | 44988475 | promoter-1 | promoter-1 | -31    | NM_00116  | 240255 | Ythdc2    | 3010002F0  |
| chr2  | 81893977 | 81894075 | exon (NM_  | exon (NM_  | 211    | NM_17551  | 241514 | Zfp804a   | C630007C1  |
| chr15 | 5161002  | 5161350  | intron (NM | intron (NM | 25616  | NM_02621  | 67515  | Ttc33     | 2410099M   |
| chr10 | 41997952 | 41998125 | Intergenic | CpG-998    | -1490  | NM_01974  | 56484  | Foxo3     | 1110048B1  |
| chr3  | 97798052 | 97798325 | Intergenic | Intergenic | -19273 | NM_01092  | 18129  | Notch2    | AI853703   |
| chr2  | 44972027 | 44972225 | Intergenic | Intergenic | -3327  | NM_01575  | 24136  | Zeb2      | 9130203F0  |
| chr9  | 44371177 | 44371250 | Intergenic | LTR33C LT  | -36709 | NM_00755  | 12145  | Cxcr5     | Blr1 CXC-R |
| chr10 | 80156277 | 80156425 | intron (NM | intron (NM | 8214   | NM_17245  | 208228 | Mob3a     | 5330417KC  |
| chr8  | 1.18E+08 | 1.18E+08 | intron (NM | intron (NM | 472631 | NM_00102  | 17132  | Maf       | 2810401A2  |
| chr17 | 27692727 | 27692900 | promoter-1 | promoter-1 | -706   | NM_00116  | 15361  | Hmga1     | AL023995   |
| chr14 | 58144227 | 58144400 | exon (NM_  | exon (NM_  | 647    | NM_14583  | 239114 | Il17d     | AI462269   |
| chr7  | 36539402 | 36539850 | promoter-1 | promoter-1 | -153   | NM_17870  | 233115 | Dpy19l3   | 6030410GC  |
| chr4  | 1.55E+08 | 1.55E+08 | Intergenic | Intergenic | -12919 | NM_01138  | 20481  | Ski       | 231001210  |
| chr10 | 24848227 | 24848450 | Intergenic | RMER15 L   | 170631 | NM_01874  | 432442 | Akap7     | 6430401DC  |
| chr10 | 1.17E+08 | 1.17E+08 | intron (NM | CpG        | 294    | NM_00763  | 12461  | Cct2      | Cctb       |
| chr11 | 77991927 | 77992100 | promoter-1 | promoter-1 | -147   | NM_00129  | 68385  | Tlcd1     | -          |
| chr19 | 45132552 | 45132725 | Intergenic | Intergenic | 10572  | NM_00117  | 94280  | Sfxn3     | -          |
| chr1  | 93308852 | 93309675 | intron (NM | CpG        | 536    | NM_01947  | 55927  | Hes6      | AI326893   |
| chr13 | 55201252 | 55201425 | intron (NM | CpG        | 318    | NM_01130  | 20184  | Uimc1     | 9430016E0  |
| chr2  | 24030852 | 24031175 | Intergenic | Intergenic | -10983 | NM_15351  | 215257 | Il1f9     | Il36g      |
| chr2  | 24241827 | 24242500 | intron (NM | intron (NM | 1246   | NM_17761  | 215632 | Psd4      | BC046518   |
| chr4  | 99495902 | 99495975 | promoter-1 | promoter-1 | -129   | NM_02634  | 67733  | Itgb3bp   | 49304710   |

|       |          |          |            |            |        |          |        |           |            |
|-------|----------|----------|------------|------------|--------|----------|--------|-----------|------------|
| chr19 | 53259752 | 53259825 | intron (NM | intron (NM | 41301  | NM_01375 | 27360  | Add3      | AI463285 I |
| chr14 | 41826877 | 41827050 | intron (NM | CpG        | 101    | NM_02746 | 70564  | Fam213a   | 5730469M   |
| chr12 | 32089627 | 32089825 | Intergenic | Intergenic | -33358 | NM_02135 | 13487  | Slc26a3   | 9030623B1  |
| chr2  | 74657327 | 74657750 | Intergenic | Intergenic | -6331  | NM_01680 | 53375  | Mtx2      | 1500012GC  |
| chr16 | 38756252 | 38756400 | intron (NM | intron (NM | 13954  | NM_00128 | 56375  | B4galt4   | 9130402OC  |
| chr16 | 16865427 | 16865725 | Intergenic | Intergenic | -1498  | NM_00119 | 16136  | Igll1     | BB139905   |
| chr14 | 55082302 | 55082500 | promoter-1 | promoter-1 | -583   | NM_02299 | 65107  | Lrp10     | Lrp9       |
| chr3  | 1.44E+08 | 1.44E+08 | 5' UTR (NM | 5' UTR (NM | 131    | NM_01072 | 16911  | Lmo4      | A730077C1  |
| chr10 | 7676427  | 7676550  | promoter-1 | promoter-1 | -567   | NM_13866 | 68652  | Tab2      | 1110030NC  |
| chr2  | 1.57E+08 | 1.57E+08 | intron (NM | CpG        | 432    | NM_01124 | 19650  | Rbl1      | AW547426   |
| chr7  | 1.18E+08 | 1.18E+08 | Intergenic | Intergenic | -4392  | NM_17732 | 319934 | Sbf2      | 4833411BC  |
| chr16 | 87611827 | 87612175 | Intergenic | Intergenic | 58426  | NM_14485 | 224419 | Map3k7cl  | C21orf7 O  |
| chr5  | 1.08E+08 | 1.08E+08 | intron (NM | intron (NM | 5250   | NM_00796 | 14020  | Evi5      | NB4S       |
| chr12 | 35670602 | 35670900 | 3' UTR (NM | 3' UTR (NM | 1318   | NM_02929 | 75456  | Prps1l1   | 1700011K1  |
| chr17 | 35363352 | 35363550 | intron (NM | intron (NM | 9309   | NM_01090 | 18038  | Nfkbil1   | Def-7 IKBL |
| chr2  | 1.57E+08 | 1.57E+08 | promoter-1 | promoter-1 | 230    | NM_02612 | 67388  | 1110008F1 | AI316789   |
| chr12 | 32730927 | 32731050 | intron (NM | intron (NM | 15156  | NM_01115 | 19088  | Prkar2b   | AI451071 , |
| chr13 | 29883377 | 29883650 | intron (NM | intron (NM | 63944  | NM_14453 | 68916  | Cdkal1    | 1190005BC  |
| chr8  | 1.23E+08 | 1.23E+08 | intron (NM | CpG        | 506    | NM_00114 | 382034 | Gse1      | 22100131I: |
| chr7  | 26436352 | 26436450 | intron (NM | intron (NM | 7379   | NM_00753 | 12039  | Bckdha    | -          |
| chr2  | 14525477 | 14526275 | promoter-1 | promoter-1 | -57    | NM_02311 | 12296  | Cacnb2    | AW060387   |
| chrX  | 68469927 | 68470050 | intron (NM | intron (NM | 1731   | NM_01992 | 17772  | Mtm1      | AF073996   |
| chr16 | 22618577 | 22618850 | intron (NM | B1F SINE , | 38591  | NM_13865 | 110197 | Dgkg      | 2900055E1  |
| chr5  | 1.44E+08 | 1.44E+08 | intron (NM | ID_B1 SINI | 1052   | NM_14491 | 231871 | Daglb     | E3300361I: |
| chr13 | 99085052 | 99085125 | intron (NM | intron (NM | 1834   | NM_14545 | 218490 | Btf3      | 1700054E1  |
| chr13 | 25072877 | 25073300 | intron (NM | intron (NM | 38067  | NM_00815 | 14756  | Gpld1     | 6330541J1  |
| chr5  | 37188427 | 37188850 | promoter-1 | promoter-1 | -645   | NM_02624 | 67568  | Mrfap1    | 9130413I2: |
| chr2  | 1.74E+08 | 1.74E+08 | intron (NM | CpG-8954   | 423    | NM_00107 | 14683  | Gnas      | 5530400H2  |
| chr1  | 1.93E+08 | 1.93E+08 | Intergenic | Intergenic | -25843 | NM_14488 | 226849 | Ppp2r5a   | PR61alpha  |
| chr3  | 54433427 | 54433650 | Intergenic | Intergenic | -63489 | NM_01999 | 56790  | Supt20    | AA667204   |
| chr1  | 94728027 | 94728525 | promoter-1 | promoter-1 | 13     | NM_01669 | 14733  | Gpc1      | AI462976   |
| chr5  | 1.07E+08 | 1.07E+08 | Intergenic | Intergenic | 26708  | NM_00127 | 12545  | Cdc7      | AI597260 I |
| chr11 | 1.18E+08 | 1.18E+08 | intron (NM | intron (NM | 1230   | NM_00111 | 19157  | Cyth1     | CLM1 CTH   |
| chr15 | 25733152 | 25733250 | intron (NM | intron (NM | -39852 | NM_00103 | 66270  | Fam134b   | 1810015CC  |
| chr10 | 80318052 | 80318200 | promoter-1 | promoter-1 | 106    | NM_17519 | 73218  | Sppl2b    | 3110056OC  |
| chr15 | 81756827 | 81756900 | promoter-1 | promoter-1 | -220   | NM_03022 | 78929  | Polr3h    | 5031409G2  |
| chr12 | 16701727 | 16701900 | intron (NM | MTE2a LTF  | 41537  | NM_00874 | 18217  | Ntsr2     | NT2R NTRI  |
| chr2  | 26358202 | 26358375 | intron (NM | CpG        | 1054   | NM_00871 | 18128  | Notch1    | 9930111A1  |
| chr7  | 30907527 | 30907625 | intron (NM | intron (NM | 609    | NM_00108 | 233060 | Zfp382    | 5930415AC  |
| chr18 | 46756927 | 46757100 | promoter-1 | promoter-1 | 176    | NM_02569 | 66676  | Tmed7     | 3930401E1  |
| chr17 | 32574127 | 32574275 | Intergenic | ID_B1 SINI | -13089 | NM_00127 | 57757  | Pglyrp2   | C730002NC  |
| chr17 | 32052677 | 32052950 | Intergenic | Intergenic | -60076 | NM_01083 | 17691  | Sik1      | Msk Sik Sr |
| chr13 | 74944427 | 74944650 | intron (NM | intron (NM | 870    | NM_00981 | 12380  | Cast      | -          |
| chr7  | 71286177 | 71286250 | Intergenic | MER2 DNA   | -12508 | NM_00103 | 17364  | Trpm1     | 4732499LO  |
| chr6  | 87800302 | 87800825 | intron (NM | CpG        | 537    | NM_00110 | 12785  | Cnbp      | AA408710   |
| chr4  | 1.55E+08 | 1.55E+08 | Intergenic | Intergenic | 6087   | NM_02198 | 21936  | Tnfrsf18  | AITR Gitr  |
| chr4  | 1.33E+08 | 1.33E+08 | Intergenic | (TG)n Sim  | 31620  | NM_00128 | 20111  | Rps6ka1   | Mapkapk-1  |

|       |          |          |             |             |         |           |        |           |            |
|-------|----------|----------|-------------|-------------|---------|-----------|--------|-----------|------------|
| chr10 | 1.28E+08 | 1.28E+08 | TTS (NM_0   | TTS (NM_0   | 307     | NM_00113  | 21853  | Timeless  | C77407 De  |
| chr4  | 1.24E+08 | 1.24E+08 | intron (NM  | CpG         | 157     | NM_01966  | 56309  | Mycbp     | 5730488M   |
| chr7  | 1.14E+08 | 1.14E+08 | Intergenic  | L1MC3 LIN   | 67629   | NM_02966  | 76572  | Rbmxl2    | 1700012HC  |
| chr3  | 1.44E+08 | 1.44E+08 | Intergenic  | Intergenic  | 91508   | NM_00116  | 16911  | Lmo4      | A730077C1  |
| chr2  | 1.25E+08 | 1.25E+08 | 5' UTR (NM  | 5' UTR (NM  | 212     | NM_02359  | 110074 | Dut       | 503141210I |
| chr15 | 65955777 | 65956025 | intron (NM  | L1MB5 LIN   | -147535 | NM_00114  | 654498 | Hhla1     | F930104E1  |
| chr1  | 1.8E+08  | 1.8E+08  | Intergenic  | Intergenic  | -40080  | NM_00116  | 269152 | Kif26b    | 4832420M   |
| chr11 | 94410377 | 94410550 | promoter-1  | promoter-1  | 58      | NM_00101  | 237926 | Rsad1     | B430319G2  |
| chr10 | 61980127 | 61980500 | Intergenic  | Intergenic  | -9810   | NM_01115  | 19073  | Srgn      | Prg Prg1 S |
| chr2  | 70498652 | 70498750 | promoter-1  | promoter-1  | -865    | NR_027343 | 70231  | Gorasp2   | 0610011AC  |
| chr9  | 45009402 | 45009650 | intron (NM  | intron (NM  | 2632    | NM_14540  | 214523 | Tmprss4   | mCAP2      |
| chr8  | 1.09E+08 | 1.09E+08 | promoter-1  | promoter-1  | 255     | NM_14541  | 214987 | Chtf8     | 5830457O1  |
| chr3  | 1.44E+08 | 1.44E+08 | promoter-1  | promoter-1  | -532    | NM_01072  | 16911  | Lmo4      | A730077C1  |
| chr3  | 96304802 | 96305050 | Intergenic  | Intergenic  | -24182  | NM_02712  | 69585  | Hfe2      | 2310035L1  |
| chr7  | 1.35E+08 | 1.35E+08 | intron (NM  | intron (NM  | 545     | NM_02637  | 67773  | Kat8      | 2010203CC  |
| chr18 | 7177027  | 7177300  | intron (NM  | Lx8 LINE L  | 120736  | NM_00108  | 74934  | Armc4     | 493046312: |
| chr7  | 54306352 | 54306450 | intron (NM  | intron (NM  | 391     | NM_02643  | 67893  | Tmem86a   | 1810054O1  |
| chr6  | 86476202 | 86476775 | promoter-1  | promoter-1  | -329    | NM_01186  | 23983  | Pcbp1     | WBP17 [a]  |
| chr14 | 21665477 | 21665550 | Intergenic  | Intergenic  | 9629    | NM_00887  | 18792  | Plau      | u-PA uPA   |
| chr3  | 1.16E+08 | 1.16E+08 | intron (NM  | intron (NM  | 505     | NM_02551  | 66368  | Rtca      | 2310009A1  |
| chr4  | 1.47E+08 | 1.47E+08 | promoter-1  | promoter-1  | 152     | NM_01084  | 17769  | Mthfr     | AI323986   |
| chr14 | 46278427 | 46278600 | promoter-1  | promoter-1  | -695    | NM_00104  | 114874 | Ddhd1     | PA-PLA1    |
| chr1  | 52289527 | 52289625 | exon (NM_   | exon (NM_   | 500     | NM_00108  | 14660  | Gls       | 6330442B1  |
| chr1  | 36300802 | 36300925 | intron (NM  | CpG         | 284     | NM_19889  | 320011 | Uggt1     | 0910001L1  |
| chr7  | 1.28E+08 | 1.28E+08 | intron (NM  | intron (NM  | 9267    | NM_02155  | 59052  | Mettl9    | 0610012DC  |
| chr19 | 34579902 | 34580050 | intron (NM  | intron (NM  | 21988   | NM_00111  | 16889  | Lipa      | AA960673   |
| chr12 | 56094852 | 56094950 | Intergenic  | Intergenic  | -7578   | NM_01381  | 217578 | Baz1a     | Acf1 B930I |
| chr4  | 1.43E+08 | 1.43E+08 | intron (NM  | intron (NM  | 10666   | NM_01032  | 14726  | Pdpn      | Gp38 OTS-  |
| chr19 | 8787477  | 8787575  | intron (NM  | intron (NM  | 861     | NM_00857  | 17254  | Slc3a2    | 4F2 4F2HC  |
| chr13 | 23618152 | 23618300 | Intergenic  | Intergenic  | -4687   | NM_15317  | 69386  | Hist1h4h  | 1700024HC  |
| chr11 | 1.1E+08  | 1.1E+08  | intron (NM  | intron (NM  | 28090   | NM_01194  | 26399  | Map2k6    | MEK6 MKI   |
| chr8  | 13036402 | 13036725 | promoter-1  | promoter-1  | -745    | NM_00797  | 14058  | F10       | Cf10 fx    |
| chr2  | 1.7E+08  | 1.7E+08  | Intergenic  | Intergenic  | -81388  | NM_00115  | 228913 | Zfp217    | 4933431CC  |
| chr18 | 21121752 | 21121925 | intron (NM  | intron (NM  | 18712   | NM_02630  | 67664  | Rnf125    | 4930553F0  |
| chr15 | 8683702  | 8683775  | Intergenic  | Intergenic  | -22931  | NM_14893  | 20512  | Slc1a3    | AI504299   |
| chr7  | 1.35E+08 | 1.35E+08 | Intergenic  | RMER19B     | -46381  | NM_14559  | 233913 | BC017158  | -          |
| chr14 | 51674252 | 51674425 | Intergenic  | Lx8 LINE L  | 2579    | NM_00101  | 497106 | Rnase12   | Rai1       |
| chr10 | 59811827 | 59812000 | intron (NM  | intron (NM  | 2314    | NM_02873  | 74048  | 4632428NC | Dies1 PD-1 |
| chr4  | 70070777 | 70071025 | intron (NM  | intron (NM  | 500     | NM_14599  | 214444 | Cdk5rap2  | 2900018KC  |
| chr11 | 53520952 | 53521025 | promoter-1  | promoter-1  | -167    | NM_00901  | 19360  | Rad50     | Mrell Rad5 |
| chr1  | 1.08E+08 | 1.08E+08 | Intergenic  | Intergenic  | -9157   | NM_00112  | 227449 | Zcchc2    | 9930114B2  |
| chr1  | 1.84E+08 | 1.84E+08 | Intergenic  | Intergenic  | -39106  | NM_13381  | 98386  | Lbr       | AI505894 i |
| chr8  | 1.24E+08 | 1.24E+08 | Intergenic  | Intergenic  | -13555  | NM_08085  | 142682 | Zcchc14   | AA792890   |
| chr11 | 51450702 | 51450850 | Intergenic  | PB1D10 SI   | -1378   | NM_02534  | 66089  | Rmnd5b    | 0610039K2  |
| chr2  | 1.07E+08 | 1.07E+08 | promoter-1  | promoter-1  | -59     | NM_00102  | 212772 | Arl14ep   | 2700007P2  |
| chr13 | 78097252 | 78097450 | intron (NR_ | intron (NR_ | -66812  | NM_02931  | 75507  | Pou5f2    | 1700013G1  |
| chr17 | 13185452 | 13185550 | promoter-1  | promoter-1  | -96     | NM_17539  | 60532  | Wtap      | 2810408KC  |



|       |          |          |            |            |        |          |        |            |            |
|-------|----------|----------|------------|------------|--------|----------|--------|------------|------------|
| chr19 | 4294652  | 4294825  | intron (NM | intron (NM | 11484  | NM_13086 | 110355 | Adrbk1     | Adrbk1 Ba  |
| chr4  | 6118177  | 6118400  | promoter-1 | promoter-1 | 36     | NM_02653 | 68053  | Ubxn2b     | 3110003A2  |
| chr5  | 1.44E+08 | 1.44E+08 | Intergenic | CpG        | -22510 | NM_00739 | 11461  | Actb       | Actx E430C |
| chr11 | 1.2E+08  | 1.2E+08  | 3' UTR (NM | 3' UTR (NM | -4047  | NM_15305 | 209011 | Sirt7      | -          |
| chr2  | 35054077 | 35054225 | intron (NM | intron (NM | 2489   | NM_02669 | 68365  | Rab14      | 0610030G2  |
| chr4  | 1.53E+08 | 1.53E+08 | promoter-1 | promoter-1 | 64     | NM_00785 | 13368  | Dffb       | 40kDa 573  |
| chr5  | 1.41E+08 | 1.41E+08 | intron (NM | intron (NM | 400    | NM_17227 | 231834 | Snx8       | B130023O:  |
| chr5  | 34512652 | 34512800 | promoter-1 | promoter-1 | -551   | NM_00128 | 272158 | Poln       | POL4P      |
| chr3  | 1.28E+08 | 1.28E+08 | promoter-1 | promoter-1 | 9      | NM_14596 | 211556 | Ap1ar      | AA407621   |
| chr3  | 97695277 | 97695500 | Intergenic | Intergenic | -2758  | NM_00128 | 83679  | Pde4dip    | 4732458AC  |
| chr4  | 1.1E+08  | 1.1E+08  | intron (NM | MIRb SINE  | -24242 | NM_17229 | 242620 | Dmrta2     | Dmr5       |
| chr11 | 17892327 | 17892400 | Intergenic | Intergenic | -38485 | NM_02657 | 68145  | Etaa1      | 5730466H2  |
| chr7  | 13619777 | 13619925 | TTS (NM_0  | TTS (NM_0  | 275    | NM_02688 | 68953  | Chmp2a     | 1500016L1  |
| chr1  | 53246502 | 53246800 | intron (NM | intron (NM | -2190  | NM_02707 | 69397  | 1700019AC- |            |
| chr14 | 62781952 | 62782350 | Intergenic | Intergenic | 129665 | NM_17341 | 239133 | Dleu7      | BC038059   |
| chr5  | 1.15E+08 | 1.15E+08 | promoter-1 | promoter-1 | 360    | NM_05409 | 117146 | Ube3b      | AI449831 , |
| chr14 | 21427152 | 21427350 | intron (NM | intron (NM | 10325  | NM_03018 | 78787  | Usp54      | 4930429G1  |
| chr14 | 8926227  | 8926650  | Intergenic | Intergenic | -4289  | NM_14545 | 218699 | Pxk        | C230080L1  |
| chr13 | 46664827 | 46665275 | intron (NM | intron (NM | 67779  | NM_02605 | 67252  | Cap2       | 2810452GC  |
| chr7  | 1.4E+08  | 1.4E+08  | intron (NM | intron (NM | 7653   | NM_00998 | 13017  | Ctbp2      | AA407280   |
| chr13 | 81003602 | 81003800 | Intergenic | Intergenic | -18982 | NM_00104 | 105171 | Arrrdc3    | AI450344 i |
| chr4  | 1.55E+08 | 1.55E+08 | exon (NM_  | exon (NM_  | 1386   | NM_03187 | 83771  | Tas1r3     | Sac T1r3   |
| chr16 | 3723427  | 3723600  | Intergenic | Intergenic | -5389  | NM_00116 | 54483  | Mefv       | FMF TRIM   |
| chr1  | 34495902 | 34496000 | promoter-1 | promoter-1 | 566    | NM_02715 | 69668  | Ccdc115    | 2310061I0! |
| chr8  | 28285477 | 28285700 | promoter-1 | promoter-1 | -470   | NM_00108 | 75767  | Rab11fip1  | 2010200K2  |
| chr11 | 58792727 | 58793025 | intron (NM | intron (NM | 1281   | NM_05316 | 94091  | Trim11     | -          |
| chr10 | 1.28E+08 | 1.28E+08 | promoter-1 | promoter-1 | -452   | NM_17373 | 211389 | Suox       | SO         |
| chr2  | 84556202 | 84556350 | promoter-1 | promoter-1 | -955   | NM_14488 | 228136 | Zdhhc5     | 1110032A1  |
| chr11 | 79100977 | 79101325 | Intergenic | Intergenic | -32954 | NM_01965 | 78889  | Wsb1       | 1110056B1  |
| chr4  | 10801177 | 10801525 | promoter-1 | promoter-1 | -294   | NM_02600 | 67157  | 2610301B2  | AI428449   |
| chr17 | 6987077  | 6987375  | promoter-1 | promoter-1 | -97    | NM_00951 | 22350  | Ezr        | AW146364   |
| chr8  | 1.25E+08 | 1.25E+08 | exon (NM_  | exon (NM_  | 50239  | NM_00766 | 12555  | Cdh15      | AI323380 i |
| chr9  | 50254477 | 50254675 | Intergenic | Intergenic | -48054 | NM_02963 | 76509  | Plet1      | 0610037B2  |
| chr5  | 1.23E+08 | 1.23E+08 | intron (NM | intron (NM | 9243   | NM_00119 | 207565 | Camkk2     | 6330570N1  |
| chr10 | 19824477 | 19824600 | intron (NM | intron (NM | -44188 | NM_00863 | 17761  | Map7       | E-MAP-115  |
| chr19 | 9040852  | 9042975  | intron (NM | intron (NM | 382    | NM_02600 | 67160  | Eef1g      | 2610301DC  |
| chr1  | 1.29E+08 | 1.29E+08 | intron (NM | B4A SINE   | 86413  | NM_14512 | 107895 | Mgat5      | 4930471A2  |
| chr7  | 1.25E+08 | 1.25E+08 | intron (NM | intron (NM | -55174 | NM_01941 | 54208  | Arl6ip1    | AIP-6 AL02 |
| chr19 | 6996077  | 6996175  | TTS (NM_0  | TTS (NM_0  | 172    | NM_00795 | 26379  | Esrra      | ERRalpha i |
| chr7  | 99985727 | 99985850 | TTS (NM_0  | TTS (NM_0  | 36954  | NM_00108 | 74041  | Ddias      | 4632434I1: |
| chr14 | 45838777 | 45838975 | promoter-1 | promoter-1 | 193    | NM_17259 | 70561  | Txndc16    | 5730420B2  |
| chr11 | 1.06E+08 | 1.06E+08 | intron (NM | CpG        | 118    | NM_19829 | 21763  | Tex2       | 4930568E0  |
| chr7  | 1.5E+08  | 1.5E+08  | exon (NM_  | exon (NM_  | 968    | NM_00855 | 17173  | Ascl2      | 2410083I1! |
| chr1  | 14208727 | 14209025 | intron (NM | intron (NM | 91404  | NM_00125 | 14048  | Eya1       | bor        |
| chr2  | 1.19E+08 | 1.19E+08 | promoter-1 | promoter-1 | -64    | NM_00129 | 18796  | Plcb2      | AI550384 i |
| chr11 | 3135477  | 3135550  | intron (NM | intron (NM | 30876  | NM_00787 | 13494  | Drg1       | AA408859   |
| chr1  | 63160277 | 63161000 | promoter-1 | promoter-1 | 203    | NM_00108 | 227195 | Ino80d     | 7330405I1: |

|       |          |          |                       |         |          |        |           |            |
|-------|----------|----------|-----------------------|---------|----------|--------|-----------|------------|
| chr10 | 79727827 | 79728000 | exon (NM_exon (NM_    | 177     | NM_13318 | 70248  | Dazap1    | 2410042M   |
| chr1  | 89652377 | 89653100 | 5' UTR (NM 5' UTR (NV | 152     | NM_00120 | 77040  | Atg16l1   | 1500009KC  |
| chr19 | 10663752 | 10663850 | 3' UTR (NM 3' UTR (NV | 12154   | NM_00128 | 225912 | Cyb561a3  | 2310004GC  |
| chr10 | 77013677 | 77013925 | exon (NM_exon (NM_    | 20708   | NM_00840 | 16414  | Itgb2     | 2E6 AI528! |
| chr11 | 1.18E+08 | 1.18E+08 | Intergenic Intergenic | -3971   | NM_00770 | 12702  | Socs3     | Cis3 Cish3 |
| chr1  | 10319527 | 10319625 | exon (NM_exon (NM_    | -96825  | NM_00110 | 211673 | Arfgef1   | ARFGEP1 E  |
| chr15 | 3904927  | 3905225  | Intergenic Intergenic | 24497   | NM_13409 | 106052 | Fbxo4     | 1700096C1  |
| chr8  | 59029627 | 59030150 | promoter-1promoter-1  | -43     | NM_01579 | 50753  | Fbxo8     | Fbx8       |
| chr1  | 1.69E+08 | 1.69E+08 | Intergenic Intergenic | -136287 | NM_17284 | 240894 | Fmo9      | 4831428F0  |
| chr3  | 1.38E+08 | 1.38E+08 | intron (NM intron (NM | 21556   | NM_00741 | 11532  | Adh5      | Adh-5 Adh  |
| chr11 | 1.01E+08 | 1.01E+08 | Intergenic Intergenic | -12676  | NM_01148 | 20848  | Stat3     | 1110034CC  |
| chr18 | 42749152 | 42749275 | Intergenic Intergenic | -9907   | NM_18154 | 240239 | Gpr151    | C130082OC  |
| chr17 | 37181677 | 37182050 | Intergenic MER20B D   | -1048   | NM_01943 | 54393  | Gabbr1    | GABAB1 G   |
| chr6  | 91649527 | 91649600 | intron (NM intron (NM | 15502   | NM_00932 | 21366  | Slc6a6    | AA589629   |
| chr15 | 99705527 | 99705675 | intron (NM intron (NM | 286     | NM_00111 | 65970  | Lima1     | Eplin      |
| chr3  | 1.38E+08 | 1.38E+08 | intron (NM intron (NM | 20487   | NM_00103 | 70604  | Dnajb14   | 5730496F1  |
| chr9  | 1.19E+08 | 1.19E+08 | promoter-1promoter-1  | -211    | NM_13086 | 113868 | Acaa1a    | Acaa Acaa  |
| chr9  | 1.16E+08 | 1.16E+08 | Intergenic B4 SINE B. | -159807 | NM_00937 | 21813  | Tgfb2     | 1110020H1  |
| chr10 | 82085677 | 82085875 | 5' UTR (NM 5' UTR (NV | 197     | NM_00113 | 544717 | 1190007IO | -          |
| chr18 | 62337002 | 62337150 | TTS (NM_0 TTS (NM_0   | 2559    | NM_00742 | 11555  | Adrb2     | Adrb-2 Bac |
| chr8  | 1.29E+08 | 1.29E+08 | Intergenic Intergenic | 97645   | NM_02421 | 67952  | Tomm20    | 1810060KC  |
| chr1  | 40539377 | 40539550 | intron (NM intron (NM | 16612   | NM_00836 | 16182  | Il18r1    | Il18ralpha |
| chr1  | 39044652 | 39044850 | promoter-1promoter-1  | 92      | NM_02685 | 68833  | Pdcl3     | 1110061A1  |
| chr4  | 1.02E+08 | 1.02E+08 | intron (NM intron (NM | -3389   | NM_00117 | 18578  | Pde4b     | Dpde4 R74  |
| chr14 | 55324627 | 55324850 | Intergenic Intergenic | 6273    | NM_20713 | 110794 | Cebpe     | C/EBPe CR  |
| chr12 | 1.14E+08 | 1.14E+08 | Intergenic Intergenic | -7544   | NM_19841 | 70435  | Inf2      | 2610204M   |
| chr5  | 77334077 | 77334475 | intron (NM intron (NM | 263     | NM_17376 | 231326 | Aasdh     | A230062GC  |
| chr2  | 52600852 | 52601000 | intron (NM CpG        | 257     | NM_01966 | 56324  | Stam2     | 1200004O1  |
| chr8  | 97190452 | 97190850 | promoter-1promoter-1  | 151     | NM_02419 | 107566 | Arl2bp    | 1700010P1  |
| chr18 | 36419702 | 36419975 | Intergenic Intergenic | -20978  | NM_00898 | 19290  | Pura      | CAGER-1 P  |
| chr19 | 21515377 | 21515675 | intron (NM intron (NM | 31625   | NM_01026 | 14544  | Gda       | AU015411   |
| chr9  | 96835952 | 96836225 | Intergenic L1M2 LINE  | -46195  | NM_00128 | 235534 | Pxylp1    | 9430094M   |
| chr13 | 52719577 | 52719825 | intron (NM intron (NM | 27450   | NM_01151 | 20963  | Syk       | Sykb       |
| chr9  | 75256802 | 75256950 | intron (NM intron (NM | 290     | NM_02741 | 50772  | Mapk6     | 2610021I2: |
| chr3  | 1.42E+08 | 1.42E+08 | intron (NM intron (NM | -90171  | NM_00127 | 12167  | Bmpr1b    | AI385617 , |
| chr5  | 1.01E+08 | 1.01E+08 | promoter-1promoter-1  | -252    | NM_01200 | 26891  | Cops4     | AW208976   |
| chr17 | 34076002 | 34076075 | exon (NM_exon (NM_    | 1237    | NM_00118 | 14976  | Pfdn6     | H-2Ke2 H2  |
| chr8  | 36892002 | 36892100 | Intergenic L1MB1 LIN  | -2438   | NM_02799 | 71908  | Cldn23    | 2310014BC  |
| chr7  | 53247952 | 53248075 | intron (NM intron (NM | 37643   | NM_01879 | 27421  | Abcc6     | Abcc1b DC  |
| chr12 | 88141802 | 88142000 | Intergenic Intergenic | 66582   | NM_00119 | 627607 | Lrrc74    | EG627607   |
| chr1  | 1.94E+08 | 1.94E+08 | promoter-1promoter-1  | -408    | NM_01163 | 22033  | Traf5     | -          |
| chr16 | 14021602 | 14021800 | intron (NM intron (NM | -34741  | NM_00127 | 74482  | Ifitm7    | 4933438K1  |
| chr12 | 76696902 | 76697200 | 5' UTR (NM 5' UTR (NV | 136     | NM_01202 | 26932  | Ppp2r5e   | 4633401M   |
| chr2  | 27281752 | 27281950 | exon (NM_exon (NM_    | 494     | NM_00950 | 22325  | Vav2      | 2810040F1  |
| chr7  | 1.34E+08 | 1.34E+08 | promoter-1promoter-1  | 40      | NM_02933 | 75565  | Ccdc101   | 1700023O:  |
| chr11 | 77328127 | 77328325 | promoter-1promoter-1  | -393    | NM_02618 | 67477  | Abhd15    | 1300007F0  |
| chr1  | 16151652 | 16151900 | Intergenic Intergenic | 55813   | NM_13383 | 98711  | Rdh10     | 3110069KC  |

|       |          |          |            |            |        |          |        |           |            |
|-------|----------|----------|------------|------------|--------|----------|--------|-----------|------------|
| chr18 | 36319777 | 36319975 | intron (NM | intron (NM | 36938  | NM_00116 | 1E+08  | Nrg2      | Don1 NTA   |
| chr2  | 1.17E+08 | 1.17E+08 | Intergenic | Intergenic | -27781 | NM_00127 | 114715 | Spred1    | 5730461F1  |
| chr5  | 65484477 | 65484600 | Intergenic | MTEb LTR   | -37932 | NM_17517 | 71778  | Klhl5     | 1300013C1  |
| chr1  | 1.73E+08 | 1.73E+08 | promoter-1 | promoter-1 | -531   | NM_00103 | 641376 | Tomm40l   | -          |
| chr16 | 29579452 | 29579725 | 5' UTR (NM | 5' UTR (NM | 168    | NM_00119 | 74143  | Opa1      | 1200011N2  |
| chr5  | 1.07E+08 | 1.07E+08 | intron (NM | CpG        | 586    | NM_02685 | 52397  | Zfp644    | 1110068L0  |
| chr7  | 20295002 | 20295275 | intron (NM | ORR1D2 L   | 5640   | NM_00110 | 53333  | Tomm40    | AW539759   |
| chr1  | 93154877 | 93155075 | intron (NM | intron (NM | 8080   | NM_02645 | 67921  | Ube2f     | 2510010F1  |
| chr3  | 93310677 | 93310775 | Intergenic | (TG)n Sim  | -13692 | NM_01674 | 20195  | S100a11   | EMAPI Em   |
| chr19 | 57441627 | 57442050 | intron (NM | intron (NM | 6339   | NM_14550 | 226252 | Fam160b1  | AI450540 I |
| chr11 | 1.06E+08 | 1.06E+08 | Intergenic | Intergenic | -5308  | NM_01049 | 15896  | Icam2     | CD102 Ica  |
| chr8  | 1.2E+08  | 1.2E+08  | exon (NM_  | exon (NM_  | 232    | NM_00116 | 74440  | Cmip      | 4933407CC  |
| chr5  | 29616602 | 29617075 | intron (NM | intron (NM | 88092  | NM_02029 | 56873  | Lmbr1     | 1110048D1  |
| chr19 | 44652727 | 44652850 | Intergenic | MIR SINE   | 15444  | NM_17695 | 319594 | Hif1an    | 2310046M   |
| chr10 | 61971977 | 61972150 | Intergenic | MTE2a LTF  | -1560  | NM_01115 | 19073  | Srgn      | Prg Prg1 S |
| chr5  | 92782652 | 92783050 | intron (NM | intron (NM | -4936  | NM_02127 | 15945  | Cxcl10    | C7 CRG-2   |
| chr1  | 37374902 | 37374975 | intron (NM | intron (NM | 18255  | NM_00129 | 269180 | Inpp4a    | 107kDa 96  |
| chr7  | 87531527 | 87531750 | intron (NM | intron (NM | 1194   | NM_01019 | 14159  | Fes       | AI586313   |
| chr6  | 57531077 | 57531175 | exon (NM_  | exon (NM_  | 140    | NM_02599 | 67138  | Herc6     | 1700121D1  |
| chr2  | 28554927 | 28555050 | promoter-1 | promoter-1 | 183    | NM_02728 | 69987  | 1700026L0 | MAST       |
| chr10 | 33739402 | 33739550 | promoter-1 | promoter-1 | -54    | NM_02561 | 66521  | Rwdd1     | 0710001KC  |
| chr4  | 63061527 | 63061600 | intron (NM | intron (NM | 2916   | NM_00104 | 100182 | Akna      | AI597013 I |
| chr3  | 57026602 | 57026825 | Intergenic | Intergenic | 79128  | NM_00853 | 17112  | Tm4sf1    | L6 M3s1    |
| chr11 | 86900227 | 86900300 | promoter-1 | promoter-1 | 16     | NM_02426 | 74133  | Smg8      | 1200011M   |
| chr14 | 68333452 | 68333525 | promoter-1 | promoter-1 | 179    | NM_00111 | 108912 | Cdca2     | 2610311M   |
| chr7  | 1.4E+08  | 1.4E+08  | Intergenic | Intergenic | 110380 | NM_01697 | 18242  | Oat       | AI194874   |
| chr7  | 74799502 | 74799675 | intron (NM | intron (NM | 7292   | NM_02590 | 67009  | Ttc23     | 1600012K1  |
| chr1  | 1.95E+08 | 1.95E+08 | promoter-1 | promoter-1 | -97    | NM_00104 | 15483  | Hsd11b1   | -          |
| chr11 | 1.13E+08 | 1.13E+08 | intron (NM | intron (NM | 2853   | NM_00116 | 69806  | Slc39a11  | 1810074D2  |
| chr10 | 62255527 | 62255750 | promoter-1 | promoter-1 | -522   | NM_02620 | 67500  | Ccar1     | 2610511G1  |
| chr1  | 1.83E+08 | 1.83E+08 | Intergenic | Intergenic | -19921 | NM_02840 | 72978  | Cnih3     | 2900075GC  |
| chr4  | 1.34E+08 | 1.34E+08 | Intergenic | Intergenic | -30521 | NM_20723 | 230815 | Man1c1    | AI593348   |
| chr13 | 1.12E+08 | 1.12E+08 | Intergenic | Intergenic | 393074 | NM_15280 | 20620  | Plk2      | Snk        |
| chr9  | 1.2E+08  | 1.2E+08  | promoter-1 | promoter-1 | 79     | NM_02597 | 67115  | Rpl14     | 3100001N1  |
| chr5  | 92863777 | 92864200 | intron (NM | CpG        | 237    | NM_18339 | 269113 | Nup54     | 3110079L0  |
| chr1  | 1.68E+08 | 1.68E+08 | intron (NM | B4 SINE B  | 1340   | NM_01180 | 433375 | Creg1     | AA755314   |
| chr9  | 25378052 | 25378150 | intron (NM | intron (NM | 88919  | NM_02618 | 67484  | Eepd1     | 2310005PC  |
| chr16 | 18108302 | 18108375 | Intergenic | Intergenic | -19055 | NM_01117 | 19125  | Prodh     | Pro-1 Pro1 |
| chr1  | 57462852 | 57463050 | promoter-1 | promoter-1 | -441   | NM_00108 | 68115  | 9430016HC | AA409999   |
| chr12 | 1.12E+08 | 1.12E+08 | Intergenic | (GA)n Sim  | -5171  | NM_01048 | 15519  | Hsp90aa1  | 86kDa 89k  |
| chr2  | 1.72E+08 | 1.72E+08 | Intergenic | Intergenic | -8956  | NM_00108 | 320664 | Cass4     | F730031O2  |
| chr7  | 1.3E+08  | 1.3E+08  | intron (NM | intron (NM | 168087 | NM_00885 | 18751  | Prkcb     | A130082FC  |
| chr11 | 1.17E+08 | 1.17E+08 | promoter-1 | promoter-1 | -155   | NM_01135 | 20382  | Srsf2     | D11Wsu17   |
| chr11 | 93746777 | 93746850 | promoter-1 | promoter-1 | 267    | NM_00101 | 217109 | Utp18     | 6230425C2  |
| chr2  | 1.3E+08  | 1.3E+08  | promoter-1 | promoter-1 | -610   | NM_02419 | 67134  | Nop56     | 2310044F1  |
| chr4  | 8715927  | 8716050  | intron (NM | intron (NM | 98435  | NM_00127 | 320790 | Chd7      | A730019I0  |
| chr6  | 17516027 | 17516225 | intron (NM | L1ME1 LIN  | -70972 | NM_00760 | 12343  | Capza2    | 1110053KC  |

|       |          |          |            |            |         |          |        |          |             |
|-------|----------|----------|------------|------------|---------|----------|--------|----------|-------------|
| chr2  | 1.63E+08 | 1.63E+08 | promoter-1 | promoter-1 | -931    | NM_02649 | 67996  | Srsf6    | 1210001E1   |
| chr13 | 64253927 | 64254100 | exon (NM_  | exon (NM_  | 494     | NM_17549 | 238673 | Zfp367   | 8030486J2   |
| chr1  | 1.65E+08 | 1.65E+08 | promoter-1 | promoter-1 | -121    | NM_01679 | 53330  | Vamp4    | D1Erttd147i |
| chr3  | 1.29E+08 | 1.29E+08 | intron (NM | intron (NM | 48729   | NM_00793 | 13809  | Enpep    | 6030431M    |
| chr5  | 1.31E+08 | 1.31E+08 | promoter-1 | promoter-1 | 43      | NM_17250 | 212919 | Kctd7    | 4932409E1   |
| chr11 | 80303327 | 80303600 | intron (NM | intron (NM | 12915   | NM_00987 | 12569  | Cdk5r1   | Cdk5r D11   |
| chr15 | 81576177 | 81576250 | intron (NM | CpG        | 935     | NM_00108 | 20286  | Zc3h7b   | Gm627 Sci   |
| chr4  | 1.33E+08 | 1.33E+08 | promoter-1 | promoter-1 | -132    | NM_01669 | 53608  | Map3k6   | Ask2 MAP1   |
| chr3  | 30494302 | 30494375 | Intergenic | CpG        | 4454    | NM_02969 | 76652  | Actrt3   | 1700119I2   |
| chr11 | 51869802 | 51869950 | intron (NM | RMER19B    | -42450  | NM_01941 | 19052  | Ppp2ca   | PP2A R75E   |
| chr11 | 97627677 | 97627925 | 5' UTR (NM | 5' UTR (NM | 126     | NM_02618 | 67480  | Cwc25    | 1300013DC   |
| chr11 | 18921227 | 18921400 | Intergenic | Intergenic | -2341   | NM_01078 | 17268  | Meis1    | C530044H1   |
| chr12 | 83631652 | 83631900 | Intergenic | Intergenic | -86249  | NM_01581 | 50779  | Rgs6     | -           |
| chr5  | 90653327 | 90653450 | promoter-1 | promoter-1 | -367    | NM_00116 | 231430 | Cox18    | BC038311    |
| chr5  | 65197452 | 65197775 | intron (NM | intron (NM | 2851    | NM_00845 | 16599  | Klf3     | 9930027GC   |
| chr3  | 1.18E+08 | 1.18E+08 | intron (NM | Lx8 LINE L | 191642  | NM_17077 | 99586  | Dpyd     | AI315208 I  |
| chr19 | 29537052 | 29537350 | intron (NM | ORR1E LTF  | 51792   | NM_02139 | 58205  | Pdcd1lg2 | B7-DC Btd   |
| chr11 | 75846877 | 75847600 | Intergenic | ID_B1 SINI | -5954   | NM_02965 | 76566  | Fam101b  | 1500005K1   |
| chr4  | 44025552 | 44025825 | exon (NM_  | exon (NM_  | 166     | NM_00129 | 12757  | Clta     | AV026556    |
| chr10 | 41193552 | 41193650 | Intergenic | Intergenic | -2519   | NM_00116 | 171580 | Mical1   | MICAL MIK   |
| chr12 | 33500877 | 33500975 | Intergenic | MTE-int LT | -4274   | NM_02152 | 59027  | Nampt    | 1110035O1   |
| chr15 | 55031752 | 55031975 | intron (NM | intron (NM | 66872   | NM_00103 | 97998  | Deptor   | Depdc6      |
| chr15 | 80429827 | 80429925 | intron (NM | intron (NM | -24037  | NM_01081 | 17444  | Grap2    | GRAP-2 GF   |
| chr13 | 95055827 | 95056000 | promoter-1 | promoter-1 | -677    | NM_02915 | 107767 | Scamp1   | 4930505M    |
| chr4  | 1.29E+08 | 1.29E+08 | promoter-1 | promoter-1 | -855    | NM_01689 | 11637  | Ak2      | Ak-2 D4Ert  |
| chr17 | 36408352 | 36409150 | promoter-1 | promoter-1 | 198     | NM_02446 | 79263  | Trim39   | 1100001D1   |
| chr8  | 1.29E+08 | 1.29E+08 | Intergenic | MIRb SINE  | -114290 | NM_00116 | 270110 | Irf2bp2  | E130305N2   |
| chr13 | 41758952 | 41759250 | Intergenic | URR1B DN   | 12970   | NM_00114 | 328231 | Gm5082   | A030008J0   |
| chr8  | 73047102 | 73047275 | promoter-1 | promoter-1 | -109    | NM_02936 | 75620  | Kxd1     | 0610030BC   |
| chr3  | 1.04E+08 | 1.04E+08 | Intergenic | Intergenic | -44909  | NM_00102 | 269473 | Lrig2    | 4632419I10  |
| chr8  | 9934927  | 9935125  | Intergenic | Intergenic | 41297   | NM_17695 | 319583 | Lig4     | 5830471N1   |
| chr15 | 85166977 | 85167100 | intron (NM | CpG        | 227     | NM_01684 | 54138  | Atxn10   | AI325283 0  |
| chr2  | 72039627 | 72039700 | intron (NM | intron (NM | -84031  | NM_02305 | 65964  | Zak      | AV006891    |
| chr17 | 66868427 | 66868700 | intron (NM | CpG        | 447     | NM_02444 | 19328  | Rab12    | 2900054P1   |
| chr5  | 1.4E+08  | 1.4E+08  | promoter-1 | promoter-1 | 36      | NM_00108 | 433956 | Heatr2   | BC053401    |
| chr2  | 1.54E+08 | 1.54E+08 | TTS (NM_0  | TTS (NM_0  | -3308   | NM_02587 | 66971  | Cdk5rap1 | 2310066P1   |
| chr5  | 13527252 | 13527450 | intron (NM | intron (NM | 128042  | NM_00915 | 20346  | Sema3a   | Hsema-1 SI  |
| chr4  | 43012777 | 43012950 | intron (NM | CpG        | 516     | NM_00950 | 269523 | Vcp      | 3110001E0   |
| chr4  | 94828277 | 94828350 | Intergenic | Intergenic | -109400 | NM_01059 | 16476  | Jun      | AP-1 Junc   |
| chr11 | 68821852 | 68821975 | promoter-1 | promoter-1 | 49      | NM_00115 | 237823 | Pfas     | 4432409B1   |
| chr3  | 27690527 | 27690725 | Intergenic | Intergenic | -81265  | NM_17318 | 72007  | Fndc3b   | 1600019O0   |
| chr19 | 53260052 | 53260200 | intron (NM | intron (NM | 41639   | NM_01375 | 27360  | Add3     | AI463285 I  |
| chr6  | 1.25E+08 | 1.25E+08 | intron (NM | CpG        | 152     | NM_01200 | 26894  | Cops7a   | D6Ertdd35e  |
| chr15 | 98557827 | 98557950 | intron (NM | intron (NM | 741     | NM_02416 | 66120  | Fkbp11   | 1110002O2   |
| chr8  | 92204052 | 92204450 | Intergenic | Intergenic | -636190 | NM_02139 | 58198  | Sall1    | Msal-3      |
| chr8  | 73421027 | 73421300 | intron (NM | CpG        | 179     | NM_02975 | 76808  | Rpl18a   | 2510019J0   |
| chr15 | 1.02E+08 | 1.02E+08 | intron (NM | intron (NM | 212     | NM_02538 | 66151  | Prr13    | 1110020C1   |

|       |          |          |            |            |        |          |        |           |            |
|-------|----------|----------|------------|------------|--------|----------|--------|-----------|------------|
| chr1  | 58449252 | 58449975 | promoter-1 | promoter-1 | -367   | NM_02582 | 66882  | Bzw1      | 1200015E1  |
| chr12 | 88235502 | 88235650 | Intergenic | Intergenic | -9812  | NM_14583 | 238330 | Irf2bpl   | 6430527G1  |
| chr12 | 86734827 | 86735075 | Intergenic | Intergenic | -19284 | NM_02677 | 68581  | Tmed10    | 1110014CC  |
| chr12 | 45370077 | 45370200 | promoter-1 | promoter-1 | -3     | NM_02616 | 67452  | Pnpla8    | 1200006O1  |
| chr8  | 74842602 | 74842675 | promoter-1 | promoter-1 | -323   | NM_00845 | 16598  | Klf2      | Lkif       |
| chr11 | 59352702 | 59352850 | Intergenic | (ATG)n Sin | -3412  | NM_14582 | 216799 | Nlrp3     | AGTAVPRL   |
| chr10 | 1.02E+08 | 1.02E+08 | Intergenic | Intergenic | 220432 | NM_14624 | 237504 | Rassf9    | AW322107   |
| chr6  | 1.25E+08 | 1.25E+08 | Intergenic | RMER15 L'  | -12358 | NM_01353 | 14794  | Spsb2     | AI461677 I |
| chr7  | 1.34E+08 | 1.34E+08 | Intergenic | MYSERV6-i  | -10673 | NM_14620 | 233890 | Zfp768    | BC026432   |
| chr1  | 87497502 | 87497725 | 5' UTR (NV | 5' UTR (NV | 335    | NM_00101 | 434484 | Sp140     | -          |
| chr13 | 99799102 | 99799250 | Intergenic | Tigger7 DN | -44656 | NM_02706 | 69382  | 1700024PC | H2bl1 Sub  |
| chr5  | 75551852 | 75552100 | promoter-1 | promoter-1 | -215   | NM_00108 | 18595  | Pdgfra    | AI115593 I |
| chr1  | 1.73E+08 | 1.73E+08 | intron (NM | intron (NM | 1996   | NM_01018 | 14131  | Fcgr3     | CD16       |
| chr12 | 1.07E+08 | 1.07E+08 | intron (NM | B3 SINE B  | 3364   | NM_17861 | 66787  | Gskip     | 4933433P1  |
| chr3  | 27589752 | 27589875 | intron (NM | ID_B1 SINI | 19548  | NM_17318 | 72007  | Fndc3b    | 1600019OC  |
| chr3  | 65733777 | 65733900 | Intergenic | Intergenic | 28309  | NM_01993 | 56706  | Ccnl1     | 2610030E2  |
| chr1  | 59108177 | 59108475 | intron (NM | intron (NM | 43418  | NM_17520 | 73463  | Als2cr11  | 1700052H2  |
| chr4  | 44085427 | 44085725 | promoter-1 | promoter-1 | -31    | NM_00119 | 50798  | Gne       | 2310066HC  |
| chr3  | 30855227 | 30855550 | intron (NM | Lx6 LINE L | 12949  | NM_00116 | 241915 | Phc3      | E030046K0  |
| chr9  | 20455977 | 20456050 | promoter-1 | promoter-1 | -561   | NM_02337 | 23988  | Pin1      | 0610025L0  |
| chr7  | 1.38E+08 | 1.38E+08 | intron (NM | MIRb SINE  | -56044 | NM_02131 | 57752  | Tacc2     | mKIAA418C  |
| chr3  | 1.1E+08  | 1.1E+08  | exon (NM_  | exon (NM_  | 291    | NM_17889 | 99890  | Prmt6     | AW124876   |
| chr11 | 83275952 | 83276025 | intron (NM | intron (NM | 475    | NM_17279 | 118453 | Mmp28     | D130023P1  |
| chr18 | 4252102  | 4252325  | Intergenic | Intergenic | 86383  | NM_02609 | 67328  | Lyzl1     | 1700038F0  |
| chr3  | 1.01E+08 | 1.01E+08 | intron (NM | intron (NM | -24352 | NM_00101 | 74044  | Ttf2      | 4632434F2  |
| chr1  | 59649927 | 59650100 | intron (NM | intron (NM | 76905  | NM_00101 | 381260 | Gm973     | AW554518   |
| chr3  | 41365802 | 41365875 | intron (NM | B3 SINE B  | -1467  | NM_17230 | 269424 | Jade1     | AU041499   |
| chr6  | 1.01E+08 | 1.01E+08 | intron (NM | RMER30 D   | 158728 | NM_01888 | 55983  | Pdzn3     | 1110020CC  |
| chr14 | 14953277 | 14953500 | promoter-1 | promoter-1 | 30     | NM_02555 | 66413  | Psmd6     | 2400006A1  |
| chrX  | 1.49E+08 | 1.49E+08 | intron (NM | RSINE1 SIN | 32918  | NM_01366 | 20591  | Kdm5c     | D930009K1  |
| chr8  | 1.14E+08 | 1.14E+08 | promoter-1 | promoter-1 | -128   | NM_00791 | 13680  | Ddx19a    | DBP5 Ddx1  |
| chr4  | 1.09E+08 | 1.09E+08 | intron (NM | intron (NM | -18485 | NM_00113 | 100273 | Osbp19    | 2600011I0  |
| chr5  | 1.06E+08 | 1.06E+08 | intron (NM | intron (NM | 1259   | NM_17870 | 231549 | Lrrc8d    | 2810473GC  |
| chr15 | 1.02E+08 | 1.02E+08 | TTS (NM_0  | TTS (NM_0  | 173    | NM_02171 | 60315  | Myg1      | 0610023AC  |
| chr12 | 35020527 | 35020675 | intron (NM | URR1B DN   | 193153 | NM_02412 | 79221  | Hdac9     | AV022454   |
| chr8  | 13337202 | 13337550 | Intergenic | Intergenic | -1375  | NM_00129 | 21781  | Tfdp1     | Dp1 Drtf1  |
| chr6  | 88017827 | 88017950 | Intergenic | Intergenic | -16579 | NM_13393 | 103963 | Rpn1      | AU018702   |
| chr19 | 5771152  | 5771350  | exon (NM_  | exon (NM_  | 150    | NM_02391 | 78891  | Scyl1     | 2810011O1  |
| chr8  | 4238327  | 4238625  | promoter-1 | promoter-1 | -264   | NM_01194 | 26400  | Map2k7    | 5930412N1  |
| chr15 | 81169677 | 81169775 | intron (NM | intron (NM | 21469  | NM_01139 | 20524  | Slc25a17  | 34kDa 47k  |
| chr3  | 1.16E+08 | 1.16E+08 | promoter-1 | promoter-1 | -89    | NM_00116 | 58193  | Extl2     | 3000001DC  |
| chr12 | 77635802 | 77636175 | intron (NM | intron (NM | 1441   | NM_15380 | 263406 | Plekhg3   | BC030417   |
| chr11 | 52174302 | 52174400 | promoter-1 | promoter-1 | -266   | NM_01169 | 22333  | Vdac1     | AL033343   |
| chr5  | 1.25E+08 | 1.25E+08 | intron (NM | Tigger7 DN | 10293  | NM_03025 | 80291  | Rilpl2    | -          |
| chr1  | 1.57E+08 | 1.57E+08 | Intergenic | Intergenic | 113453 | NM_01050 | 15939  | Ier5      | -          |
| chr11 | 1.17E+08 | 1.17E+08 | intron (NM | intron (NM | -5928  | NM_01738 | 53860  | 9-Sep     | MSF1 Msf   |
| chrY  | 2858227  | 2858325  | Intergenic | Intergenic | 471018 | NM_00127 | 1E+08  | Gm3376    | Rbmy1b     |

|       |          |          |                       |        |           |        |            |            |
|-------|----------|----------|-----------------------|--------|-----------|--------|------------|------------|
| chr6  | 83864527 | 83864950 | intron (NM CpG        | 391    | NM_00871  | 18139  | Zfml       | AI323587 I |
| chr5  | 54438527 | 54438875 | intron (NM ORR1E LTF  | 48939  | NM_00108  | 116873 | Stim2      | -          |
| chr2  | 3581402  | 3581775  | Intergenic Intergenic | -49142 | NM_02562  | 66540  | Fam107b    | 3110001A1  |
| chr4  | 1.09E+08 | 1.09E+08 | Intergenic MER20 DN   | 55389  | NM_00767  | 12580  | Cdkn2c     | C77269 IN  |
| chr5  | 1.35E+08 | 1.35E+08 | intron (NM CpG        | 185    | NM_03356  | 22384  | Eif4h      | AU018978   |
| chr8  | 1.22E+08 | 1.22E+08 | intron (NM intron (NM | 27516  | NM_02807  | 72042  | Cotl1      | 1810074P2  |
| chr1  | 1.2E+08  | 1.2E+08  | promoter-1promoter-1  | 78     | NM_00129  | 76707  | Clasp1     | 1700030C2  |
| chr19 | 46764352 | 46764525 | promoter-1promoter-1  | 42     | NM_02556  | 66439  | 20100120C  | 4930569L1  |
| chr19 | 29458177 | 29458425 | intron (NM intron (NM | 16373  | NM_02189  | 60533  | Cd274      | A530045L1  |
| chr13 | 13617952 | 13618175 | Intergenic Intergenic | -64613 | NM_01074  | 17101  | Lyst       | D13Sfk13 I |
| chr6  | 1.4E+08  | 1.4E+08  | intron (NM intron (NM | 43885  | NM_01108  | 18705  | Pik3c2g    | C80387 PI: |
| chr11 | 69572127 | 69572250 | promoter-1promoter-1  | -53    | NM_00129  | 20020  | Polr2a     | 220kDa Rc  |
| chr6  | 1.47E+08 | 1.47E+08 | intron (NM Lx8 LINE L | 9096   | NM_14557  | 232536 | Mrps35     | MDSO23 M   |
| chr5  | 1.01E+08 | 1.01E+08 | Intergenic Intergenic | 70378  | NM_17271  | 231510 | Agpat9     | 1-AGPAT 1  |
| chr4  | 8463102  | 8463425  | intron (NM CpG        | 472    | NM_02151  | 59021  | Rab2a      | 9330148M   |
| chr4  | 1.28E+08 | 1.28E+08 | exon (NM_ exon (NM_   | -15364 | NM_00119  | 54383  | Phc2       | A3galt2 A/ |
| chr2  | 1.51E+08 | 1.51E+08 | intron (NM CpG        | 233    | NM_19832  | 386649 | Nsfl1c     | Munc-18c   |
| chr12 | 71554577 | 71554725 | intron (NM intron (NM | 510    | NM_02833  | 72736  | Tmx1       | 2810425AC  |
| chrX  | 56466102 | 56466325 | intron (NM intron (NM | -46948 | NM_00129  | 14168  | Fgf13      | Fhf2       |
| chr10 | 98409927 | 98410075 | intron (NM intron (NM | 32215  | NM_02648  | 67972  | Atp2b1     | 2810442I2: |
| chr12 | 1.09E+08 | 1.09E+08 | promoter-1promoter-1  | 243    | NM_02826  | 52690  | Setd3      | 2610102I0: |
| chr1  | 54982777 | 54982850 | intron (NM CpG        | 418    | NM_00108  | 329154 | Ankrd44    | 4930444A1  |
| chr6  | 8159452  | 8159700  | intron (NM CpG        | 349    | NM_14537  | 252875 | Mios       | C81488     |
| chr5  | 90652752 | 90652925 | exon (NM_ exon (NM_   | 183    | NR_028088 | 231430 | Cox18      | BC038311   |
| chrX  | 1.37E+08 | 1.37E+08 | Intergenic Intergenic | 34034  | NM_02146  | 19139  | Prps1      | 2310010D1  |
| chr5  | 1.38E+08 | 1.38E+08 | Intergenic Intergenic | 10477  | NM_01347  | 12007  | Azgp1      | Zag        |
| chr11 | 78161027 | 78161275 | intron (NM intron (NM | 4127   | NM_01167  | 22248  | Unc119     | D11Bhm52   |
| chr2  | 72124852 | 72125025 | intron (NM intron (NM | 1180   | NM_17808  | 65964  | Zak        | AV006891   |
| chr8  | 87230902 | 87231450 | 3' UTR (NM 3' UTR (NV | 5820   | NM_00853  | 17095  | Lyl1       | Lyl-1 bHLH |
| chr2  | 1.68E+08 | 1.68E+08 | Intergenic MIRc SINE  | -88726 | NM_01120  | 19246  | Ptpn1      | PTP-1B PTI |
| chr19 | 55877777 | 55877900 | intron (NM intron (NM | 61538  | NM_00114  | 21416  | Tcf7l2     | TCF4B TCF  |
| chr12 | 32808377 | 32808500 | Intergenic (CAAAn Si  | -62294 | NM_01115  | 19088  | Prkar2b    | AI451071 , |
| chr10 | 94380702 | 94380775 | intron (NM intron (NM | 26474  | NM_01879  | 54712  | Plxnc1     | 2510048K1  |
| chr5  | 1.46E+08 | 1.46E+08 | promoter-1promoter-1  | -112   | NM_01976  | 56443  | Arpc1a     | 0610010HC  |
| chr5  | 1.05E+08 | 1.05E+08 | exon (NM_ exon (NM_   | 475    | NM_00886  | 18764  | Pkd2       | C030034P1  |
| chr12 | 78058702 | 78059225 | intron (NM intron (NM | 4272   | NM_00855  | 17187  | Max        | AA960152   |
| chr1  | 1.35E+08 | 1.35E+08 | promoter-1promoter-1  | -217   | NM_13381  | 108954 | Ppp1r15b   | 1810033K1  |
| chr18 | 35016202 | 35016275 | Intergenic Intergenic | -4623  | NM_00791  | 13653  | Egr1       | A530045N:  |
| chr16 | 4969577  | 4969900  | intron (NM intron (NM | 5356   | NR_07337C | 74684  | 4930451G(- |            |
| chr2  | 91536452 | 91536725 | intron (NMB4A SINE    | 14161  | NM_14552  | 51897  | Atg13      | 1110053A2  |
| chr12 | 86451602 | 86451800 | promoter-1promoter-1  | -82    | NM_03022  | 78920  | Dlst       | 1600017E0  |
| chr7  | 82508452 | 82508525 | Intergenic B3A SINE   | -54340 | NM_15357  | 64176  | Sv2b       | A830038FC  |
| chr4  | 1.23E+08 | 1.23E+08 | exon (NM_ exon (NM_   | 10403  | NM_00116  | 442834 | D830031N   | Kiaa0754 r |
| chr11 | 1.01E+08 | 1.01E+08 | intron (NM CpG        | 161    | NM_00894  | 19183  | Psmc3ip    | C79099 G1  |
| chr4  | 22284627 | 22285000 | non-coding non-coding | 123    | NR_10438C | 269514 | Fbxl4      | AI836810 I |
| chr1  | 64783152 | 64783500 | 5' UTR (NV 5' UTR (NV | 998    | NM_00104  | 14367  | Fzd5       | 5330434NC  |
| chr10 | 79349052 | 79349150 | promoter-1promoter-1  | 44     | NM_01577  | 50701  | Elane      | Ela2 F430C |

|       |          |          |            |            |         |          |        |           |             |
|-------|----------|----------|------------|------------|---------|----------|--------|-----------|-------------|
| chr19 | 4397777  | 4398025  | promoter-1 | promoter-1 | -824    | NM_00100 | 225876 | Kdm2a     | 100043628   |
| chr5  | 1E+08    | 1E+08    | Intergenic | RMER15-in  | 96344   | NM_00107 | 11991  | Hnrnpd    | Auf1 Hnrp   |
| chr1  | 1.08E+08 | 1.08E+08 | intron (NM | intron (NM | 3268    | NM_00112 | 227449 | Zcchc2    | 9930114B2   |
| chr8  | 82235202 | 82235650 | promoter-1 | promoter-1 | 213     | NM_01575 | 24015  | Abce1     | C79080 Oa   |
| chr6  | 1.38E+08 | 1.38E+08 | promoter-1 | promoter-1 | 90      | NM_17273 | 232449 | Dera      | 2010002D2   |
| chr18 | 20797802 | 20797975 | Intergenic | Intergenic | -25863  | NM_01369 | 22139  | Ttr       | AA408768    |
| chr4  | 1.29E+08 | 1.29E+08 | intron (NM | CpG        | 363     | NM_00903 | 19646  | Rbbp4     | mRbAp48     |
| chr3  | 51534627 | 51534725 | intron (NM | intron (NM | 69561   | NM_17499 | 211666 | Mgst2     | GST2 MGS    |
| chr7  | 7252402  | 7252500  | promoter-1 | promoter-1 | -229    | NM_01133 | 12727  | Clcn4-2   | Clc4-2 Clcr |
| chr16 | 36477102 | 36477250 | Intergenic | Intergenic | -21698  | NM_02528 | 20863  | Stfa3     | Stf3        |
| chr7  | 3645402  | 3645600  | promoter-1 | promoter-1 | 289     | NM_00116 | 66078  | Tsen34    | 0610027F0   |
| chr10 | 79786277 | 79786375 | exon (NM_  | exon (NM_  | -3033   | NM_02552 | 66374  | 2310011J0 | AI452186    |
| chr4  | 1.49E+08 | 1.49E+08 | intron (NM | CpG        | 425     | NM_02746 | 70556  | Slc25a33  | 5730438N1   |
| chr1  | 75138927 | 75139250 | promoter-1 | promoter-1 | -146    | NM_02697 | 69171  | Cnppd1    | 1810031K1   |
| chr4  | 41083277 | 41083500 | intron (NM | intron (NM | 334     | NM_02627 | 67615  | Ube2r2    | 1200003M    |
| chr9  | 1.23E+08 | 1.23E+08 | 5' UTR (NM | 5' UTR (NM | 194     | NM_00100 | 72309  | Tmem158   | 2310037P2   |
| chr1  | 1.46E+08 | 1.46E+08 | Intergenic | Intergenic | 102866  | NM_00906 | 19735  | Rgs2      | GOS8        |
| chr17 | 28906877 | 28907175 | exon (NM_  | exon (NM_  | 764     | NM_01195 | 26415  | Mapk13    | SAPK4 Serl  |
| chr3  | 1.57E+08 | 1.57E+08 | intron (NM | intron (NM | 9345    | NM_01119 | 19218  | Ptger3    | EP3 Pgereg  |
| chr1  | 1.54E+08 | 1.54E+08 | promoter-1 | promoter-1 | -1      | NM_19799 | 69399  | 1700025GC | 2610510E0   |
| chr7  | 25689202 | 25689275 | promoter-1 | promoter-1 | -127    | NM_00113 | 16801  | Arhgef1   | Lbcl2 Lsc   |
| chr8  | 11249877 | 11250050 | intron (NM | intron (NM | 62863   | NM_00993 | 12826  | Col4a1    | Bru Col4a-  |
| chr4  | 1.03E+08 | 1.03E+08 | intron (NM | intron (NM | -13679  | NM_00129 | 23919  | InsI5     | RIF2        |
| chr10 | 58725877 | 58726050 | Intergenic | Intergenic | 41293   | NM_17293 | 268301 | Sowahc    | 4921515AC   |
| chr13 | 98011227 | 98011650 | 5' UTR (NV | 5' UTR (NV | 378     | NM_00793 | 13803  | Enc1      | Nrpb PIG1   |
| chr7  | 25227302 | 25227550 | intron (NM | intron (NM | 3275    | NM_19901 | 210145 | Irgc1     | F630044M    |
| chr8  | 37514552 | 37514825 | Intergenic | Intergenic | -37557  | NM_17695 | 319582 | 6430573F1 | Kiaa1456    |
| chr19 | 15999527 | 15999750 | promoter-1 | promoter-1 | -89     | NM_17742 | 107272 | Psat1     | D8Ert814    |
| chr6  | 1.48E+08 | 1.48E+08 | intron (NM | intron (NM | 58600   | NM_17879 | 330450 | Far2      | A230046P1   |
| chr2  | 1.7E+08  | 1.7E+08  | intron (NM | intron (NM | 3369    | NM_00103 | 228913 | Zfp217    | 4933431CC   |
| chr5  | 1.31E+08 | 1.31E+08 | intron (NM | CpG        | 112     | NM_00776 | 12909  | Crcp      | AL022669    |
| chr9  | 88453777 | 88453925 | intron (NM | intron (NM | 10993   | NM_00116 | 71640  | Zfp949    | 493042210   |
| chr6  | 47350002 | 47350150 | Intergenic | Intergenic | -54247  | NM_01204 | 26965  | Cul1      | -           |
| chr5  | 68434677 | 68434775 | intron (NM | intron (NM | 11652   | NM_00101 | 433899 | Grxcr1    | Tg(Eno2-Ga  |
| chr2  | 1.67E+08 | 1.67E+08 | Intergenic | Intergenic | -2385   | NM_01983 | 56336  | B4galt5   | 943007810   |
| chr10 | 1.15E+08 | 1.15E+08 | Intergenic | Lx6 LINE L | -5879   | NM_02445 | 216344 | Rab21     | 9630024B2   |
| chr13 | 43304427 | 43304650 | intron (NM | MLT1E2 LT  | -37668  | NM_00125 | 67046  | Tbc1d7    | 2610009CC   |
| chr11 | 74462927 | 74463200 | promoter-1 | promoter-1 | 66      | NM_00108 | 74148  | Cluh      | 130000110   |
| chr6  | 38869727 | 38869900 | intron (NM | intron (NM | 828     | NM_01153 | 21391  | Tbxas1    | CYP5 CYP5   |
| chr10 | 79447077 | 79447425 | promoter-1 | promoter-1 | -176    | NM_00100 | 216157 | Tmem259   | AC087114.   |
| chr7  | 17401802 | 17402075 | exon (NM_  | exon (NM_  | 143     | NM_17343 | 243853 | Fkrp      | A830029B1   |
| chr18 | 56732652 | 56732725 | promoter-1 | promoter-1 | -95     | NM_00112 | 110695 | Aldh7a1   | Atq1 D18V   |
| chr2  | 58999202 | 58999325 | promoter-1 | promoter-1 | 356     | NM_17546 | 227937 | Pkp4      | 503142210   |
| chr4  | 1.18E+08 | 1.18E+08 | promoter-1 | promoter-1 | 134     | NM_02693 | 69072  | Ebna1bp2  | 1810014B1   |
| chr5  | 15952852 | 15953025 | Intergenic | Intergenic | -106375 | NM_00128 | 15234  | Hgf       | C230052L0   |
| chr2  | 62435502 | 62435625 | 3' UTR (NV | 3' UTR (NV | -23485  | NM_00798 | 14089  | Fap       | -           |
| chr11 | 55282652 | 55282850 | promoter-1 | promoter-1 | -503    | NM_01371 | 27041  | G3bp1     | AI849976 I  |

|       |          |          |                       |         |           |        |          |              |
|-------|----------|----------|-----------------------|---------|-----------|--------|----------|--------------|
| chr3  | 1.22E+08 | 1.22E+08 | promoter-1promoter-1  | -130    | NM_00899  | 19299  | Abcd3    | AI313901     |
| chrX  | 91358602 | 91358825 | intron (NML1M5 LINE   | 10033   | NM_01176  | 22764  | Zfx      | Zfx5 Zfx5,6  |
| chr10 | 93352602 | 93352925 | 5' UTR (NM 5' UTR (NM | 1184    | NM_01964  | 56307  | Metap2   | 4930584B2    |
| chr18 | 5123502  | 5123575  | Intergenic Intergenic | 76951   | NM_15315  | 225115 | Svil     | AU024053     |
| chr1  | 95132402 | 95132900 | exon (NM_ exon (NM_   | 177     | NM_17246  | 208777 | Sned1    | 672045512    |
| chr1  | 58656252 | 58656475 | Intergenic L1M5 LINE  | 12920   | NM_02559  | 66495  | Ndufb3   | 2700033110   |
| chrX  | 1.36E+08 | 1.36E+08 | intron (NM intron (NM | 4304    | NM_02327  | 66889  | Rnf128   | 1300002C1    |
| chr2  | 24173927 | 24174100 | Intergenic Intergenic | -18367  | NM_03116  | 16181  | Il1rn    | F630041P1    |
| chr9  | 1.22E+08 | 1.22E+08 | promoter-1promoter-1  | -206    | NM_02679  | 26901  | Deb1     | 111002010    |
| chr4  | 1.27E+08 | 1.27E+08 | promoter-1promoter-1  | -71     | NM_00111  | 67785  | Zmym4    | 6330503C1    |
| chr3  | 1.44E+08 | 1.44E+08 | intron (NM intron (NM | 18736   | NM_00128  | 54673  | Sh3glb1  | AA409932     |
| chr11 | 84792927 | 84793250 | Intergenic Intergenic | 21832   | NM_00760  | 12351  | Car4     | AW456718     |
| chr10 | 26096377 | 26096525 | Intergenic Intergenic | -1460   | NM_17278  | 237339 | L3mbtl3  | AI481284     |
| chrX  | 55315877 | 55316200 | Intergenic Intergenic | 32233   | NM_00957  | 22773  | Zic3     | Bn Ka        |
| chr2  | 1.36E+08 | 1.36E+08 | intron (NM intron (NM | 111372  | NM_01382  | 18798  | Plcb4    | A930039J0    |
| chr11 | 84336127 | 84336500 | intron (NM CpG        | 2723    | NM_00849  | 16869  | Lhx1     | Lim1         |
| chr19 | 24601302 | 24601575 | intron (NM intron (NM | 28879   | NM_00884  | 18719  | Pip5k1b  | PI4P5K-I [b] |
| chr17 | 28152402 | 28152475 | intron (NM intron (NM | 65091   | NM_01368  | 21463  | Tcp11    | D17Ken1 T    |
| chr8  | 12983952 | 12984325 | intron (NM intron (NM | 34720   | NM_00115  | 17207  | Mcf2l    | C130040G2    |
| chr13 | 67444152 | 67444625 | exon (NM_ exon (NM_   | -10892  | NM_17762  | 218314 | Zfp595   | A230042K1    |
| chr1  | 1.55E+08 | 1.55E+08 | intron (NM CpG        | 188     | NM_00116  | 226517 | Smg7     | 9430023P1    |
| chr3  | 84139402 | 84139675 | Intergenic Intergenic | -30841  | NM_00127  | 80890  | Trim2    | mKIAA051:    |
| chr15 | 31279577 | 31279675 | intron (NM intron (NM | 17888   | NM_00116  | 67434  | Ankrd33b | 0610012AC    |
| chr14 | 66860627 | 66860800 | intron (NM intron (NM | -28324  | NM_00116  | 19229  | Ptk2b    | CADTK CAI    |
| chr11 | 72254977 | 72255125 | exon (NM_ exon (NM_   | 171     | NM_01677  | 18432  | Mybbp1a  | AL024407     |
| chr18 | 10532527 | 10532600 | intron (NM intron (NM | 77787   | NM_00108  | 77805  | Esco1    | A930014I1    |
| chr4  | 94717702 | 94717800 | exon (NM_ exon (NM_   | 1162    | NM_01059  | 16476  | Jun      | AP-1 Junc    |
| chr1  | 1.86E+08 | 1.86E+08 | intron (NM intron (NM | 18811   | NM_02201  | 63953  | Dusp10   | 2610306G1    |
| chr15 | 63497052 | 63497275 | Intergenic BGLII_Mus  | 143131  | NM_03137  | 83492  | Gsdmc    | Gsdmc1 M     |
| chr4  | 1.34E+08 | 1.34E+08 | promoter-1promoter-1  | -260    | NM_00128  | 100163 | Pafah2   | 2310074E2    |
| chr8  | 3240752  | 3241025  | intron (NML1MB3 LIN   | 38729   | NM_01056  | 16337  | Insr     | 4932439J0    |
| chr7  | 50800227 | 50800425 | Intergenic L1MA9 LIN  | -11785  | NM_02129  | 12489  | Cd33     | Siglec-3 gp  |
| chr7  | 86536552 | 86536625 | promoter-1promoter-1  | -636    | NM_14594  | 208836 | Fanci    | -            |
| chr11 | 1.2E+08  | 1.2E+08  | 5' UTR (NM 5' UTR (NM | 252     | NM_00116  | 72055  | Slc38a10 | 1810073NC    |
| chr9  | 50270552 | 50270950 | Intergenic MTEb LTR   | -31879  | NM_02963  | 76509  | Plet1    | 0610037B2    |
| chr1  | 1.93E+08 | 1.93E+08 | promoter-1promoter-1  | -521    | NR_037578 | 52477  | Angel2   | 2610307I2:   |
| chr13 | 55701127 | 55701325 | promoter-1promoter-1  | -246    | NM_14604  | 218271 | B4galt7  | -            |
| chr10 | 98728077 | 98728150 | intron (NM intron (NM | 2248    | NM_02626  | 67603  | Dusp6    | 1300019I0:   |
| chr15 | 1.01E+08 | 1.01E+08 | intron (NM intron (NM | 48660   | NM_02153  | 59033  | Slc4a8   | AW493845     |
| chr14 | 76245227 | 76245425 | promoter-1promoter-1  | 263     | NM_00942  | 22070  | Tpt1     | TCTP Trt p   |
| chr3  | 21834702 | 21834775 | Intergenic Intergenic | -140836 | NM_03073  | 81004  | Tbl1xr1  | 8030499HC    |
| chr9  | 89545802 | 89546050 | Intergenic Intergenic | -28102  | NM_15350  | 209743 | AF529169 | DD1 Kiaa1    |
| chr1  | 1.33E+08 | 1.33E+08 | intron (NM intron (NM | 5157    | NM_00855  | 17164  | Mapkapk2 | AA960234     |
| chr5  | 1.36E+08 | 1.36E+08 | exon (NM_ exon (NM_   | 154     | NM_01024  | 14371  | Fzd9     | mfz9         |
| chr15 | 78199402 | 78199775 | Intergenic MER45A D   | 19611   | NM_00116  | 73376  | Tex33    | 1700061J0:   |
| chr1  | 1.73E+08 | 1.73E+08 | intron (NM intron (NM | 264     | NM_00108  | 226641 | Atf6     | 9130025P1    |
| chr17 | 15841302 | 15841900 | promoter-1promoter-1  | -330    | NM_00769  | 12648  | Chd1     | 4930525N2:   |



|       |          |          |                        |         |          |        |          |              |
|-------|----------|----------|------------------------|---------|----------|--------|----------|--------------|
| chr9  | 1.06E+08 | 1.06E+08 | Intergenic CpG         | -1869   | NM_17484 | 235582 | Glyctk   | 6230410P1    |
| chr15 | 38174752 | 38175000 | Intergenic MLT1J1 LT   | 25918   | NM_00875 | 18285  | Odf1     | -            |
| chr13 | 55141502 | 55141725 | intron (NM intron (NM  | -18867  | NM_00103 | 212032 | Hk3      | HK III HK-II |
| chr12 | 1.17E+08 | 1.17E+08 | exon (NM_exon (NM_     | 155     | NM_00951 | 22355  | Vipr2    | VPAC2 VP     |
| chr12 | 59837477 | 59837850 | Intergenic RMER19B     | 275341  | NM_00914 | 20334  | Sec23a   | Msec23 Se    |
| chr14 | 61003102 | 61003225 | Intergenic Intergenic  | 6040    | NM_00116 | 72125  | Amer2    | 2600011E0    |
| chr9  | 59135327 | 59135625 | Intergenic Intergenic  | -3903   | NM_02812 | 72141  | Adpgk    | 2610017G0    |
| chr6  | 88852652 | 88852825 | intron (NM CpG         | 493     | NM_01190 | 24100  | Tpra1    | 40kDa Gpr    |
| chr11 | 97563702 | 97563950 | promoter-1promoter-1   | -922    | NM_01197 | 26446  | Psmb3    | AL033320     |
| chr5  | 1.35E+08 | 1.35E+08 | promoter-1promoter-1   | -57     | NM_05326 | 114674 | Gtf2ird2 | 1700012P1    |
| chr1  | 1.66E+08 | 1.66E+08 | Intergenic Intergenic  | 25756   | NM_00116 | 20343  | Sell     | AI528707 I   |
| chr1  | 75212027 | 75212350 | TTS (NM_0 TTS (NM_0    | 3640    | NM_00944 | 22145  | Tuba4a   | M[a]4 Tub    |
| chr16 | 20621727 | 20621950 | promoter-1promoter-1   | -487    | NM_02842 | 73047  | Camk2n2  | 2900075A1    |
| chrX  | 1.39E+08 | 1.39E+08 | intron (NM intron (NM  | 2057    | NM_00119 | 209497 | Tmem164  | AI316850 I   |
| chr10 | 98410752 | 98411075 | intron (NM intron (NM  | 33127   | NM_02648 | 67972  | Atp2b1   | 2810442I2    |
| chr9  | 1.22E+08 | 1.22E+08 | Intergenic Intergenic  | -2208   | NM_02617 | 67469  | Abhd5    | 1300003D0    |
| chr6  | 1.37E+08 | 1.37E+08 | Intergenic Intergenic  | -22637  | NM_00859 | 17313  | Mgp      | Mglap        |
| chr14 | 22319277 | 22319425 | intron (NM CpG         | 344     | NM_01747 | 54169  | Kat6b    | AI507552 I   |
| chr6  | 1.25E+08 | 1.25E+08 | promoter-1promoter-1   | 87      | NM_13874 | 110109 | Nop2     | 120kDa A5    |
| chr13 | 1.01E+08 | 1.01E+08 | Intergenic MT2A LTR    | 9225    | NM_01373 | 27220  | Cartpt   | Cart         |
| chr2  | 1.53E+08 | 1.53E+08 | intron (NM intron (NM  | 4588    | NM_00103 | 228790 | Asxl1    | mKIAA0978    |
| chr6  | 18467727 | 18467825 | Intergenic Intergenic  | -2951   | NM_08028 | 30785  | Cttnbp2  | 3010022N2    |
| chr19 | 8896877  | 8897025  | intron (NM intron (NM  | 3060    | NM_00108 | 68693  | Hnrnpul2 | 1110031M     |
| chr8  | 87432127 | 87432275 | promoter-1promoter-1   | -322    | NM_01006 | 13423  | Dnase2a  | Dnase2       |
| chr2  | 30916752 | 30916850 | intron (NM intron (NM  | 35219   | NM_00117 | 14269  | Fnbp1    | 1110057E0    |
| chr17 | 75110252 | 75110625 | Intergenic Intergenic  | -6652   | NM_15281 | 74196  | Ttc27    | 2610511O1    |
| chr11 | 4194552  | 4194775  | Intergenic MIR SINE    | 27864   | NM_00103 | 16878  | Lif      | -            |
| chr6  | 84873852 | 84873925 | intron (NM intron (NM  | 145619  | NM_17707 | 75914  | Exoc6b   | 4930569O1    |
| chr2  | 1.44E+08 | 1.44E+08 | intron (NMPB1D10 SI    | 1148    | NM_00125 | 27054  | Sec23b   | -            |
| chr13 | 20878902 | 20878975 | Intergenic Intergenic  | -7044   | NM_00128 | 27052  | Aoah     | 4930433E1    |
| chr4  | 1.23E+08 | 1.23E+08 | Intergenic Intergenic  | 17584   | NM_02203 | 64059  | Oxct2a   | Oxct Oxct2   |
| chr10 | 1.1E+08  | 1.1E+08  | intron (NM CpG         | 259     | NM_17255 | 320150 | Zdhhc17  | A230053P1    |
| chr11 | 64792127 | 64792200 | promoter-1promoter-1   | -374    | NM_02347 | 68626  | Elac2    | 1110017O0    |
| chr10 | 1.23E+08 | 1.23E+08 | intron (NM CpG         | 203     | NM_02760 | 14479  | Usp15    | 4921514G1    |
| chr15 | 34168602 | 34168675 | intron (NM intron (NM  | 857     | NM_03352 | 114128 | Laptm4b  | C330023P1    |
| chr1  | 51620802 | 51620950 | Intergenic Intergenic  | -85633  | NM_02869 | 109019 | Nabp1    | 4930434H0    |
| chr1  | 9993152  | 9993225  | intron (NR_intron (NR_ | 6029    | NR_11097 | 69312  | Ppp1r42  | 1700011J1    |
| chr5  | 1.23E+08 | 1.23E+08 | promoter-1promoter-1   | -249    | NM_01982 | 56378  | Arpc3    | 1110006A0    |
| chrX  | 39689927 | 39690025 | Intergenic Intergenic  | 134944  | NM_00129 | 20843  | Stag2    | 9230105L2    |
| chr1  | 1.31E+08 | 1.31E+08 | Intergenic Intergenic  | -22337  | NM_00991 | 12767  | Cxcr4    | CD184 Cm     |
| chr3  | 95325052 | 95325450 | Intergenic Intergenic  | -5457   | NM_02128 | 13040  | Ctss     | -            |
| chr13 | 74074877 | 74075175 | promoter-1promoter-1   | 189     | NM_02718 | 69716  | Trip13   | 2410002G2    |
| chr9  | 1.14E+08 | 1.14E+08 | promoter-1promoter-1   | -215    | NM_00128 | 76499  | Clasp2   | 1500004F1    |
| chr8  | 87509227 | 87509975 | Intergenic Intergenic  | -4893   | NM_13325 | 170833 | Hook2    | A630054I0    |
| chr1  | 64347652 | 64347775 | Intergenic Intergenic  | -179750 | NM_03356 | 93691  | Klf7     | 9830124P0    |
| chr3  | 68496652 | 68496825 | intron (NM intron (NM  | 1392    | NM_00835 | 16159  | Il12a    | IL-12p35 Il  |
| chr19 | 46184727 | 46185125 | Intergenic Intergenic  | -21463  | NM_00770 | 12686  | Elovl3   | CIN-2 Cig3   |

|       |          |          |            |            |         |           |        |           |             |
|-------|----------|----------|------------|------------|---------|-----------|--------|-----------|-------------|
| chr16 | 44604302 | 44604450 | Intergenic | Intergenic | -45393  | NM_17250  | 117606 | Boc       | 4732455C1   |
| chr7  | 82844877 | 82845000 | intron (NM | intron (NM | -148286 | NM_00112  | 207952 | Klhl25    | 2810402K1   |
| chr2  | 1.27E+08 | 1.27E+08 | Intergenic | B2_Mm1t    | -12396  | NM_17555  | 108011 | Ap4e1     | 2310033A2   |
| chr16 | 19976052 | 19976275 | intron (NM | RMER5 LTI  | 6959    | NM_18339  | 239743 | Klhl6     | -           |
| chr14 | 1.04E+08 | 1.04E+08 | 5' UTR (NV | 5' UTR (NV | 254     | NM_20721  | 105689 | Mycbp2    | AU023734    |
| chr4  | 1.2E+08  | 1.2E+08  | intron (NM | intron (NM | 808     | NM_00127  | 18046  | Nfyc      | -           |
| chr13 | 93544827 | 93545300 | intron (NM | intron (NM | 19710   | NM_01158  | 21828  | Thbs4     | TSP4        |
| chr9  | 7184552  | 7184775  | promoter-1 | promoter-1 | 97      | NM_02977  | 76863  | Dcun1d5   | 3110001A1   |
| chr3  | 68848827 | 68849000 | promoter-1 | promoter-1 | -249    | NM_02586  | 66949  | Trim59    | 2310035M    |
| chr16 | 10756327 | 10756525 | Intergenic | Intergenic | 29203   | NM_00989  | 12703  | Socs1     | Cish1 Cish1 |
| chr13 | 1.03E+08 | 1.03E+08 | Intergenic | Intergenic | -31266  | NM_00107  | 18708  | Pik3r1    | PI3K p50a1  |
| chr10 | 61158252 | 61158425 | promoter-1 | promoter-1 | 4       | NR_073587 | 71767  | Tysnd1    | 1300019N1   |
| chr11 | 98927327 | 98927525 | 3' UTR (NV | 3' UTR (NV | 23194   | NM_17256  | 217169 | Tns4      | 9930017AC   |
| chr12 | 4776002  | 4776125  | promoter-1 | promoter-1 | 10      | NM_17543  | 207921 | Fam228b   | A830093I2   |
| chr4  | 1.01E+08 | 1.01E+08 | intron (NM | L2a LINE L | 4514    | NM_01070  | 16847  | Lepr      | LEPROT Le   |
| chr17 | 44915152 | 44915225 | intron (NM | intron (NM | 1068    | NM_17865  | 109115 | Supt3     | 2310066G2   |
| chr2  | 50151902 | 50152250 | promoter-1 | promoter-1 | 121     | NM_13383  | 109129 | Mmadhc    | 2010311DC   |
| chr17 | 15097152 | 15097225 | intron (NM | intron (NM | 1049    | NM_02425  | 72057  | Phf10     | 1810055PC   |
| chr19 | 41463402 | 41463600 | Intergenic | Intergenic | -3941   | NM_03137  | 83490  | Pik3ap1   | 1810044J0   |
| chr9  | 66440352 | 66440850 | exon (NM_  | exon (NM_  | 186     | NM_14493  | 235441 | Usp3      | AA409661    |
| chr1  | 1.87E+08 | 1.87E+08 | Intergenic | Charlie14a | -28185  | NM_14551  | 226778 | Mark1     | AW491150    |
| chr13 | 32924377 | 32924600 | Intergenic | Intergenic | 18566   | NM_02542  | 66222  | Serpinb1a | 1190005M    |
| chr19 | 40734402 | 40734575 | intron (NM | intron (NM | 204     | NM_00984  | 12495  | Entpd1    | 2610206BC   |
| chr6  | 1.16E+08 | 1.16E+08 | intron (NM | intron (NM | 21572   | NM_02637  | 67784  | Plxnd1    | 6230425C2   |
| chr11 | 54601002 | 54601075 | intron (NM | CpG        | 167     | NM_17862  | 72729  | Cdc42se2  | 2810404F1   |
| chr10 | 79537777 | 79538050 | intron (NM | intron (NM | 21149   | NM_00103  | 625249 | Gpx4      | GPx-4 GSH   |
| chr6  | 96615827 | 96616175 | Intergenic | Intergenic | 394404  | NM_17723  | 320701 | Fam19a4   | C130034I1   |
| chr10 | 85472902 | 85473050 | intron (NM | intron (NM | 1629    | NM_17777  | 270757 | Bpifc     | 4732454E2   |
| chr7  | 20162727 | 20163125 | exon (NM_  | exon (NM_  | 290     | NM_02240  | 63872  | Zfp296    | 2210018A1   |
| chr9  | 56996077 | 56996150 | Intergenic | Intergenic | -1272   | NM_02834  | 72774  | Neil1     | 2810450N1   |
| chr9  | 1.23E+08 | 1.23E+08 | Intergenic | RMER15-in  | -11876  | NM_00119  | 671232 | Topaz1    | Gm9524      |
| chr1  | 1.37E+08 | 1.37E+08 | exon (NM_  | exon (NM_  | 1136    | NM_17708  | 320139 | Ptpn7     | BPTP-4 C9   |
| chr13 | 83213202 | 83213450 | Intergenic | Intergenic | -429707 | NM_00117  | 17260  | Mef2c     | 5430401D1   |
| chr8  | 73153702 | 73154225 | exon (NM_  | exon (NM_  | 1571    | NM_01181  | 23886  | Gdf15     | MIC-1 NAC   |
| chr7  | 16895377 | 16895500 | intron (NM | CpG        | 506     | NM_13323  | 170770 | Bbc3      | PUMA PUI    |
| chr18 | 21160452 | 21160700 | exon (NM_  | exon (NM_  | 734     | NM_20762  | 56515  | Rnf138    | 2410015A1   |
| chr7  | 1.34E+08 | 1.34E+08 | 5' UTR (NV | 5' UTR (NV | 268     | NM_00128  | 20399  | Sh2b1     | AI425885 I  |
| chr6  | 94650077 | 94650200 | promoter-1 | promoter-1 | 1       | NM_00837  | 16206  | Lrig1     | D6Bwg078    |
| chr5  | 1.11E+08 | 1.11E+08 | promoter-1 | promoter-1 | 74      | NM_00946  | 22241  | Ulk1      | AU041434    |
| chr5  | 68106277 | 68106350 | intron (NM | Tigger1 DN | 107191  | NM_00103  | 330096 | Shisa3    | D830007B1   |
| chr4  | 1.35E+08 | 1.35E+08 | promoter-1 | promoter-1 | -43     | NM_00992  | 12802  | Cnr2      | CB-2 CB2    |
| chr1  | 1.84E+08 | 1.84E+08 | intron (NM | CpG        | 477     | NM_00785  | 13244  | Degs1     | AA536663    |
| chr4  | 24825552 | 24825650 | intron (NM | intron (NM | 371     | NM_02674  | 68493  | Ndufaf4   | 1110007M    |
| chr1  | 1.93E+08 | 1.93E+08 | intron (NM | CpG        | 244     | NM_02586  | 66950  | Tmem206   | 2310028NC   |
| chr3  | 9249677  | 9249825  | promoter-1 | promoter-1 | -816    | NM_17766  | 229055 | Zbtb10    | 4832414A1   |
| chr7  | 20147077 | 20148050 | 5' UTR (NV | 5' UTR (NV | 184     | NM_19914  | 232947 | Ppp1r37   | Gm158 Lrr   |
| chr4  | 89157802 | 89157900 | Intergenic | Intergenic | -197038 | NM_17564  | 242523 | Dmrta1    | Dmrta4      |

|       |          |          |             |             |         |           |          |            |            |
|-------|----------|----------|-------------|-------------|---------|-----------|----------|------------|------------|
| chr9  | 72822427 | 72822800 | Intergenic  | Intergenic  | 10570   | NM_00119  | 546143   | Ccpg1os    | EG546143   |
| chr17 | 37095027 | 37095150 | promoter-1  | promoter-1  | 285     | NM_02316  | 66136    | Znrd1      | 1110014NC  |
| chr9  | 85390602 | 85390750 | Intergenic  | Intergenic  | -169919 | NM_00116  | 212943   | Fam46a     | D930050G(  |
| chr13 | 67562652 | 67562775 | Intergenic  | Lx4A LINE   | -10153  | NM_17771  | 238692   | Zfp874a    | C330011K1  |
| chr16 | 38460252 | 38460400 | intron (NM  | intron (NM  | 1313    | NM_00985  | 12519    | Cd80       | B71 Cd28   |
| chr13 | 58259577 | 58259725 | intron (NM  | intron (NM  | 641     | NM_19800  | 75731    | Idnk       | 5133401NC  |
| chr5  | 44173402 | 44173575 | promoter-1  | promoter-1  | -100    | NM_17872  | 242960   | Fbx15      | Fbl4 Fir4  |
| chr16 | 49699902 | 49700050 | intron (NM  | intron (NM  | 569     | NM_02868  | 73916    | lft57      | 4833420A1  |
| chr6  | 47785902 | 47786000 | intron (NM  | CpG         | 291     | NM_02747  | 272347   | Zfp398     | 5730513I2: |
| chr12 | 85202752 | 85203100 | intron (NR_ | intron (NR_ | 14836   | NM_00127  | 18222    | Numb       | Nb         |
| chr1  | 82721402 | 82721675 | promoter-1  | promoter-1  | 45      | NM_02940  | 75734    | Mff        | 5230400G2  |
| chr2  | 32987052 | 32987200 | Intergenic  | Intergenic  | -44402  | NM_17888  | 99326    | Garn13     | AW120551   |
| chr1  | 63840977 | 63841275 | Intergenic  | Intergenic  | -25285  | NM_00125  | 74426    | 4933402D2- |            |
| chr15 | 27594052 | 27594225 | exon (NM_   | exon (NM_   | 17159   | NM_00124  | 223433   | Fam105a    | 9830126M   |
| chr5  | 1.24E+08 | 1.24E+08 | Intergenic  | Intergenic  | -4614   | NM_00104  | 208043   | Setd1b     | AA516740   |
| chr5  | 1.18E+08 | 1.18E+08 | promoter-1  | promoter-1  | -128    | NM_01885  | 23980    | Pebp1      | HCNP Pbp   |
| chr2  | 30683952 | 30684150 | promoter-1  | promoter-1  | -231    | NM_13334  | 72323    | Asb6       | 2510004M   |
| chr13 | 74729227 | 74729300 | Intergenic  | Intergenic  | -48057  | NM_03071  | 80898    | Erap1      | Arts1 ERA/ |
| chr9  | 91746802 | 91747000 | Intergenic  | Intergenic  | -340873 | NM_00119  | 1.01E+08 | Plscr5     | 331000     |
| chr12 | 56093877 | 56094050 | Intergenic  | MLT1E2 LT   | -6640   | NM_01381  | 217578   | Baz1a      | Acf1 B930  |
| chr6  | 28212027 | 28212500 | promoter-1  | promoter-1  | -662    | NM_00108  | 627049   | Zfp800     | AA407452   |
| chr3  | 1.04E+08 | 1.04E+08 | intron (NR_ | intron (NR_ | 301     | NM_00897  | 19260    | Ptpn22     | 70zpep PE  |
| chr3  | 1.46E+08 | 1.46E+08 | intron (NM  | intron (NM  | 257     | NM_00129  | 74245    | Ctbs       | 2210401K1  |
| chr13 | 95064977 | 95065225 | Intergenic  | MTC LTR I   | -9865   | NM_02915  | 107767   | Scamp1     | 4930505M   |
| chr3  | 83704752 | 83704925 | intron (NM  | intron (NM  | -59308  | NM_01190  | 24088    | Tlr2       | Ly105      |
| chr3  | 1.46E+08 | 1.46E+08 | promoter-1  | promoter-1  | -203    | NM_01110  | 18749    | Prkacb     | Pkacb      |
| chr2  | 49306627 | 49306825 | promoter-1  | promoter-1  | -280    | NM_17266  | 227867   | Epc2       | 5830499L1  |
| chr10 | 84647327 | 84647500 | 5' UTR (NV  | 5' UTR (NV  | 386     | NM_00777  | 12952    | Cry1       | AU020726   |
| chr2  | 1.29E+08 | 1.29E+08 | Intergenic  | Intergenic  | -5893   | NM_01055  | 16175    | Il1a       | Il-1a      |
| chr3  | 51815202 | 51815300 | intron (NM  | intron (NM  | 93677   | NM_00100  | 433586   | Maml3      | AV234550   |
| chr2  | 1.44E+08 | 1.44E+08 | intron (NM  | intron (NM  | 1623    | NM_13362  | 81910    | Rrbp1      | 1700087NC  |
| chr5  | 66154727 | 66155000 | intron (NM  | CpG         | 103     | NM_00102  | 333789   | N4bp2      | B3bp E43C  |
| chr1  | 1.53E+08 | 1.53E+08 | intron (NM  | CpG         | 427     | NM_01127  | 19821    | Rnf2       | AI326319 , |
| chr4  | 1.07E+08 | 1.07E+08 | Intergenic  | Intergenic  | -36951  | NR_03349( | 16975    | Lrp8       | 4932703M   |
| chr2  | 91252427 | 91252700 | intron (NM  | intron (NM  | 32236   | NM_17512  | 228356   | 1110051M   | AI586322   |
| chr15 | 97351027 | 97351375 | Intergenic  | ORR1E-int   | 185052  | NM_02800  | 71919    | Rpap3      | 2310042P2  |
| chr8  | 1.25E+08 | 1.25E+08 | Intergenic  | MTE2a LTF   | -3464   | NM_02601  | 67177    | Cdt1       | 2610318F1  |
| chr11 | 86940827 | 86941075 | 5' UTR (NV  | 5' UTR (NV  | 374     | NM_19798  | 68729    | Trim37     | 1110032A1  |
| chr8  | 1.14E+08 | 1.14E+08 | intron (NM  | intron (NM  | 24133   | NM_00116  | 170737   | Znrf1      | B830022L2  |
| chr6  | 53473952 | 53474075 | Intergenic  | Intergenic  | -49355  | NM_17272  | 231991   | Creb5      | Crebpa D4  |
| chr2  | 72284327 | 72284675 | Intergenic  | Intergenic  | -29775  | NM_02586  | 66953    | Cdca7      | 2310021G(  |
| chr11 | 49057002 | 49057250 | promoter-1  | promoter-1  | -567    | NM_01079  | 17308    | Mgat1      | Mgat-1     |
| chr9  | 96299952 | 96300100 | Intergenic  | Intergenic  | -35308  | NM_00750  | 11933    | Atp1b3     | AA409958   |
| chr1  | 90551202 | 90551350 | Intergenic  | Intergenic  | 47490   | NM_17730  | 320982   | Arl4c      | A630084M   |
| chr2  | 1.65E+08 | 1.65E+08 | Intergenic  | Intergenic  | -5231   | NM_01359  | 17395    | Mmp9       | AW743869   |
| chr10 | 1.27E+08 | 1.27E+08 | Intergenic  | Charlie1a I | -17497  | NM_00117  | 216440   | Os9        | 4632413K1  |
| chr7  | 26191527 | 26191750 | intron (NML | L2c LINE L  | 6267    | NM_15357  | 232983   | Cxcl17     | VCC-1 Vcc: |

|       |          |          |                |            |        |           |        |           |             |
|-------|----------|----------|----------------|------------|--------|-----------|--------|-----------|-------------|
| chr7  | 20531477 | 20531625 | intron (NM     | intron (NM | 4541   | NM_02730  | 70080  | Igsf23    | 2210010C1   |
| chr10 | 1.21E+08 | 1.21E+08 | intron (NM     | intron (NM | 56270  | NM_17302  | 270802 | BC048403  | E030027L1   |
| chr9  | 90140052 | 90140375 | intron (NM     | intron (NM | 25394  | NM_19433  | 67016  | Tbc1d2b   | 1810061M    |
| chr8  | 87609202 | 87609275 | intron (NM     | intron (NM | 2070   | NM_01076  | 17159  | Man2b1    | AW107687    |
| chr11 | 82721627 | 82721825 | exon (NM_      | exon (NM_  | 171    | NM_14543  | 217011 | Nle1      | AL022765    |
| chr11 | 69888177 | 69888425 | Intergenic     | Intergenic | -17845 | NM_00749  | 11890  | Asgr2     | ASGPR2 A    |
| chr7  | 73205652 | 73205725 | intron (NM     | CpG        | 466    | NM_02133  | 68981  | Snrpa1    | 1500015NC   |
| chr6  | 1.17E+08 | 1.17E+08 | intron (NML1_  | Mur2 L     | 7616   | NM_17804  | 213391 | Rassf4    | 3830411C1   |
| chr1  | 1.64E+08 | 1.64E+08 | Intergenic     | MIRc SINE  | 11888  | NM_00120  | 14103  | Fasl      | APT1LG1 C   |
| chr5  | 1.14E+08 | 1.14E+08 | promoter-1     | promoter-1 | -355   | NM_01692  | 53890  | Sart3     | AU045857    |
| chr2  | 1.67E+08 | 1.67E+08 | promoter-1     | promoter-1 | 42     | NM_02323  | 66589  | Ube2v1    | 0610011JO   |
| chr10 | 74980702 | 74980775 | promoter-1     | promoter-1 | -49    | NM_02609  | 67332  | Snrpd3    | 1700043E1   |
| chr7  | 36039202 | 36039450 | Intergenic     | L1MB4 LIN  | -38962 | NM_00102  | 435965 | Lrp3      | -           |
| chr1  | 53353527 | 53353775 | promoter-1     | promoter-1 | 189    | NM_15355  | 227099 | Pms1      | -           |
| chr3  | 32020452 | 32020600 | intron (NM     | B3 SINE B  | 218901 | NM_02823  | 72413  | Kcnmb2    | 2700049B1   |
| chr1  | 89905152 | 89905325 | promoter-1     | promoter-1 | -112   | NM_00103  | 227334 | Usp40     | B230215L0   |
| chr6  | 4562952  | 4563100  | intron (NML1M5 | LINE       | 11960  | NM_14539  | 213819 | Casd1     | Cas1 Cast1  |
| chr5  | 1.13E+08 | 1.13E+08 | promoter-1     | promoter-1 | 248    | NM_13864  | 192232 | Hps4      | 2010205OC   |
| chr3  | 1.02E+08 | 1.02E+08 | Intergenic     | Intergenic | -19212 | NM_00103  | 242126 | Slc22a15  | 2610034P2   |
| chr3  | 1.52E+08 | 1.52E+08 | intron (NM     | ID_B1 SINI | 2134   | NM_00107  | 170822 | Usp33     | 9830169D1   |
| chr13 | 20185502 | 20185825 | intron (NM     | intron (NM | 3287   | NM_08028  | 140580 | Elmo1     | 6330578D2   |
| chr8  | 1.27E+08 | 1.27E+08 | promoter-1     | promoter-1 | 230    | NM_01032  | 14712  | Gnpat     | AU019525    |
| chr8  | 81407052 | 81407150 | Intergenic     | Intergenic | -62050 | NM_03014  | 78651  | Lsm6      | 1500031N1   |
| chr6  | 1.09E+08 | 1.09E+08 | Intergenic     | Intergenic | -29390 | NM_02601  | 67166  | Arl8b     | 2610313E0   |
| chr3  | 1.31E+08 | 1.31E+08 | promoter-1     | promoter-1 | -381   | NM_00128  | 23971  | Papss1    | AI325286 ,  |
| chr1  | 1.67E+08 | 1.67E+08 | intron (NML4   | LINE R1    | 3549   | NM_02743  | 70456  | Mpc2      | 0610006CC   |
| chr2  | 1.32E+08 | 1.32E+08 | Intergenic     | Intergenic | -6007  | NM_01882  | 54338  | Slc23a2   | AI844736 I  |
| chr4  | 35172577 | 35172725 | intron (NM     | CpG        | 478    | NM_00108  | 73205  | 3110043O2 | AI840585    |
| chr8  | 1.28E+08 | 1.28E+08 | intron (NM     | intron (NM | 173118 | NM_17485  | 244667 | Disc1     | -           |
| chr17 | 35118827 | 35119050 | promoter-1     | promoter-1 | -137   | NM_00120  | 27756  | Lsm2      | D17H6S56f   |
| chr13 | 51196552 | 51196750 | promoter-1     | promoter-1 | -265   | NM_00128  | 20729  | Spin1     | Spin        |
| chr5  | 91311002 | 91311150 | Intergenic     | Intergenic | -9195  | NM_00817  | 14825  | Cxcl1     | Fsp Gro1 I  |
| chr3  | 84129027 | 84129125 | Intergenic     | ORR1E LTF  | -20379 | NM_00127  | 80890  | Trim2     | mKIAA0517   |
| chr8  | 80775002 | 80775150 | intron (NM     | intron (NM | 37835  | NM_18309  | 73301  | Ttc29     | 1700031F1   |
| chr11 | 76659377 | 76659600 | intron (NM     | intron (NM | 1022   | NM_00775  | 12874  | Cpd       | AA960140    |
| chr15 | 80874227 | 80874325 | intron (NM     | intron (NM | 61201  | NM_15304  | 223701 | Mkl1      | AMKL Bsac   |
| chr8  | 72757902 | 72757975 | promoter-1     | promoter-1 | -187   | NM_00116  | 234373 | Sugp2     | Sfrs14 Srsf |
| chr17 | 28068852 | 28069000 | intron (NM     | intron (NM | 22675  | NM_18141  | 224650 | Anks1     | Anks1a mt   |
| chr17 | 28938177 | 28938250 | 5' UTR (NM     | 5' UTR (NM | 142    | NM_00108  | 268936 | Brpf3     | AI413466 ,  |
| chr4  | 10879652 | 10879850 | Intergenic     | L1_Mur3 L  | 55015  | NM_17517  | 71801  | Plekhf2   | 1110070JO   |
| chr6  | 1.16E+08 | 1.16E+08 | promoter-1     | promoter-1 | 60     | NM_02792  | 71779  | 8-Mar     | 1300017E0   |
| chr7  | 20408927 | 20409100 | promoter-1     | promoter-1 | -909   | NM_03360  | 12051  | Bcl3      | AI528691 I  |
| chr11 | 99091477 | 99091775 | intron (NM     | CpG        | 705    | NM_02061  | 57376  | Smarce1   | 2810417B2   |
| chr4  | 25208827 | 25208900 | exon (NM_      | exon (NM_  | 105    | NM_02619  | 67490  | Ufl1      | 1810074P2   |
| chr19 | 4200477  | 4200650  | exon (NM_      | exon (NM_  | 1040   | NM_01123  | 19367  | Rad9a     | Rad9        |
| chr4  | 1.29E+08 | 1.29E+08 | intron (NMB1F  | SINE ,     | 2070   | NM_00103  | 11637  | Ak2       | Ak-2 D4Ert  |
| chr18 | 11815677 | 11815825 | promoter-1     | promoter-1 | -107   | NR_045526 | 225182 | Rbbp8     | 9930104E2   |

|       |          |          |             |             |         |          |          |            |            |
|-------|----------|----------|-------------|-------------|---------|----------|----------|------------|------------|
| chr14 | 48182202 | 48182450 | intron (NM  | intron (NM  | 5783    | NM_17259 | 1.01E+08 | Atg14      | 4832427M   |
| chr10 | 62226552 | 62226650 | intron (NM  | intron (NM  | 28515   | NM_02620 | 67500    | Ccar1      | 2610511G1  |
| chr12 | 72069652 | 72069725 | Intergenic  | Intergenic  | -5922   | NM_01118 | 19167    | Psma3      | Lmpc8      |
| chr3  | 33919377 | 33919500 | intron (NM  | CpG         | 437     | NM_00111 | 14359    | Fxr1       | 1110050J0  |
| chr10 | 98344402 | 98344475 | Intergenic  | Intergenic  | -33348  | NM_02648 | 67972    | Atp2b1     | 2810442I2: |
| chr7  | 24974652 | 24974800 | Intergenic  | Intergenic  | 14662   | NM_00102 | 232966   | Zfp114     | Gm1957 Z   |
| chr10 | 81591502 | 81591600 | intron (NM  | intron (NM  | 793     | NM_00116 | 216177   | AU041133   | -          |
| chr10 | 1.22E+08 | 1.22E+08 | intron (NM  | CpG         | 345     | NM_15305 | 216395   | Tmem5      | 6330415D2  |
| chr1  | 1.66E+08 | 1.66E+08 | Intergenic  | Intergenic  | 21456   | NM_00116 | 20343    | Sell       | AI528707 I |
| chr11 | 87181752 | 87181875 | Intergenic  | Intergenic  | -9317   | NM_17716 | 320472   | Ppm1e      | AW049266   |
| chr1  | 1.34E+08 | 1.34E+08 | intron (NM  | intron (NM  | 20295   | NM_17887 | 68875    | Tmcc2      | 1110063G1  |
| chr17 | 34740327 | 34740525 | promoter-1  | promoter-1  | 80      | NM_01940 | 54197    | Rnf5       | 2410131OC  |
| chr6  | 89371552 | 89371700 | intron (NM  | intron (NM  | -59019  | NM_00888 | 18844    | Plxna1     | 2600013DC  |
| chr5  | 18815402 | 18816225 | intron (NM  | Lx9 LINE L  | 82949   | NM_00117 | 50791    | Magi2      | AIP-1 Acvr |
| chr6  | 1.17E+08 | 1.17E+08 | Intergenic  | Lx5 LINE L  | 7607    | NM_02605 | 67255    | Zfp422     | 2900028O2  |
| chr16 | 35046527 | 35046675 | intron (NM  | intron (NM  | 24094   | NM_02358 | 70757    | Ptplb      | 6330408J2  |
| chrX  | 1.05E+08 | 1.05E+08 | Intergenic  | Intergenic  | 45949   | NM_00103 | 213450   | Gm732      | -          |
| chr9  | 1.15E+08 | 1.15E+08 | Intergenic  | URR1B DN    | -5427   | NM_00125 | 102545   | Cmtm7      | AI481279 I |
| chr5  | 1.23E+08 | 1.23E+08 | promoter-1  | promoter-1  | 34      | NM_02688 | 68948    | Fam216a    | 1500011H2  |
| chr9  | 1.1E+08  | 1.1E+08  | intron (NM  | intron (NM  | -13974  | NM_01388 | 29873    | Cspg5      | Caleb Ngc  |
| chr11 | 6314927  | 6315025  | promoter-1  | promoter-1  | -897    | NM_00890 | 268373   | Ppia       | 2700098CC  |
| chr6  | 1.43E+08 | 1.43E+08 | 5' UTR (NV  | 5' UTR (NV  | 176     | NM_02925 | 75320    | Etnk1      | 1110061E1  |
| chrX  | 11241477 | 11241650 | Intergenic  | Intergenic  | 336615  | NM_00111 | 236663   | Gm4906     | EG236663   |
| chr13 | 41930177 | 41930350 | intron (NM  | Lx8 LINE L  | 12594   | NM_17541 | 109254   | Adtrp      | 9530008L1  |
| chr4  | 8463952  | 8464250  | intron (NM  | intron (NM  | 1310    | NM_02151 | 59021    | Rab2a      | 9330148M   |
| chr7  | 79410177 | 79410375 | intron (NM  | intron (NM  | 41205   | NM_00102 | 244049   | Mctp2      | Gm489      |
| chr2  | 1.29E+08 | 1.29E+08 | promoter-1  | promoter-1  | -87     | NM_17840 | 78751    | Zc3h6      | 4631426GC  |
| chr8  | 1.31E+08 | 1.31E+08 | Intergenic  | Intergenic  | -126266 | NM_01057 | 16412    | Itgb1      | 4633401G2  |
| chr7  | 20086452 | 20086775 | Intergenic  | Intergenic  | 7067    | NM_17769 | 232946   | Bloc1s3    | BC043666   |
| chr8  | 1.27E+08 | 1.27E+08 | promoter-1  | promoter-1  | 817     | NM_19810 | 102058   | Exoc8      | AI414418 I |
| chr15 | 75771127 | 75771775 | promoter-1  | promoter-1  | 69      | NM_03019 | 78834    | Zfp623     | 2610029DC  |
| chr1  | 1.52E+08 | 1.52E+08 | 3' UTR (NV  | 3' UTR (NV  | 6672    | NM_01119 | 19225    | Ptgs2      | COX2 Cox-  |
| chr19 | 54278252 | 54278350 | Intergenic  | Intergenic  | 158629  | NM_00741 | 11551    | Adra2a     | AW122659   |
| chr3  | 16083302 | 16083475 | non-coding  | non-coding  | 205     | NM_00114 | 229096   | Ythdf3     | 9130022A1  |
| chr11 | 5344652  | 5344825  | 5' UTR (NV  | 5' UTR (NV  | 112     | NM_00108 | 407821   | Znrf3      | Gm1167     |
| chr4  | 21654752 | 21654925 | promoter-1  | promoter-1  | -10     | NM_00129 | 51813    | Ccnc       | AI451004 , |
| chr17 | 36160627 | 36160725 | intron (NR_ | intron (NR_ | -3171   | NM_00820 | 15042    | H2-T24     | H-2T24     |
| chr8  | 87396452 | 87396575 | 5' UTR (NV  | 5' UTR (NV  | 356     | NM_00116 | 71846    | Syce2      | 1700013H1  |
| chr11 | 6315227  | 6315575  | promoter-1  | promoter-1  | -472    | NM_00890 | 268373   | Ppia       | 2700098CC  |
| chr1  | 1.86E+08 | 1.86E+08 | promoter-1  | promoter-1  | 189     | NM_02851 | 73363    | 1700056E2- |            |
| chr5  | 1.21E+08 | 1.21E+08 | intron (NM  | intron (NM  | 800     | NM_13322 | 170756   | Slc8b1     | AF261233   |
| chr5  | 1.38E+08 | 1.38E+08 | exon (NM_   | exon (NM_   | 1841    | NM_02391 | 78829    | Tsc22d4    | 0610009M   |
| chr1  | 1.67E+08 | 1.67E+08 | promoter-1  | promoter-1  | -612    | NM_14551 | 108735   | Sft2d2     | 2010005O1  |
| chr2  | 86015702 | 86015875 | Intergenic  | RLTR45 LT   | -3816   | NM_14701 | 259013   | Olfr1044   | MOR185-4   |
| chr9  | 50489952 | 50490125 | intron (NM  | intron (NM  | -22153  | NM_14561 | 235339   | Dlat       | 6332404GC  |
| chrX  | 50673827 | 50673975 | Intergenic  | PB1D10 SI   | 47291   | NM_02867 | 73866    | Fam122c    | 4930432H1  |
| chr3  | 1.29E+08 | 1.29E+08 | intron (NM  | intron (NM  | 53154   | NM_00793 | 13809    | Enpep      | 6030431M   |

|       |          |          |                        |         |           |        |           |            |
|-------|----------|----------|------------------------|---------|-----------|--------|-----------|------------|
| chr14 | 21748327 | 21748500 | promoter-1promoter-1   | -242    | NM_00950  | 22330  | Vcl       | 9430097D2  |
| chr11 | 17111852 | 17112025 | promoter-1promoter-1   | 42      | NM_17890  | 103784 | Wdr92     | AI553587 I |
| chr3  | 1.46E+08 | 1.46E+08 | exon (NM_exon (NM_     | 225     | NM_00974  | 12042  | Bcl10     | AI132454 I |
| chr5  | 1.44E+08 | 1.44E+08 | intron (NMB1_Mm SI     | 886     | NM_08056  | 108086 | Rnf216    | 2810055G2  |
| chr7  | 25292227 | 25292750 | intron (NR_CpG         | 382     | NR_110958 | 232969 | Zfp428    | 2410005HC  |
| chr7  | 50235027 | 50235100 | Intergenic IAPLTR3-in  | -39105  | NM_00110  | 668612 | Gm9268    | EG668612   |
| chr12 | 1.04E+08 | 1.04E+08 | intron (NML1MB8 LIN    | 64975   | NM_00116  | 217835 | Rin3      | 6430500KC  |
| chr10 | 80214752 | 80214850 | Intergenic Intergenic  | -3150   | NM_19932  | 208266 | Dot1l     | A630076O   |
| chr1  | 1.68E+08 | 1.68E+08 | promoter-1promoter-1   | 96      | NM_17517  | 71592  | Pogk      | 9130401E2  |
| chr4  | 1.09E+08 | 1.09E+08 | 5' UTR (NV 5' UTR (NV  | 214     | NM_00767  | 12580  | Cdkn2c    | C77269 IN  |
| chr19 | 56466052 | 56466175 | Intergenic Charlie8 D  | -1585   | NM_00128  | 18175  | Nrap      | -          |
| chr19 | 47911727 | 47911825 | promoter-1promoter-1   | 75      | NM_02755  | 1E+08  | Cfap43    | 4632415N1  |
| chr9  | 85643227 | 85643375 | promoter-1promoter-1   | -360    | NM_00108  | 108837 | Ibtk      | 5430411K1  |
| chr11 | 61961877 | 61962325 | intron (NM intron (NM  | 71575   | NM_00102  | 432572 | Specc1    | 2810012GC  |
| chr9  | 99039727 | 99039975 | intron (NM intron (NM  | 779     | NM_02909  | 74769  | Pik3cb    | 1110001JO  |
| chr7  | 1.47E+08 | 1.47E+08 | Intergenic Intergenic  | -21257  | NM_18314  | 212111 | Inpp5a    | -          |
| chr8  | 23521327 | 23521450 | promoter-1promoter-1   | -424    | NM_02056  | 57312  | Mrps31    | 1500002DC  |
| chr10 | 79537502 | 79537600 | intron (NM intron (NM  | 20787   | NM_00103  | 625249 | Gpx4      | GPx-4 GSH  |
| chr7  | 28393152 | 28393350 | intron (NM intron (NM  | 2372    | NM_00743  | 11652  | Akt2      | 2410016A1  |
| chr15 | 26406677 | 26406775 | Intergenic Intergenic  | 167899  | NM_17759  | 211147 | 11-Mar    | 9630025C2  |
| chr1  | 1.54E+08 | 1.54E+08 | intron (NM intron (NM  | -65216  | NM_00103  | 66967  | Edem3     | 2310050N1  |
| chr12 | 1.14E+08 | 1.14E+08 | 5' UTR (NV 5' UTR (NV  | 194     | NM_02819  | 72308  | Brf1      | 2510002F2  |
| chr1  | 1.93E+08 | 1.93E+08 | Intergenic Intergenic  | -23631  | NM_14488  | 226849 | Ppp2r5a   | PR61alpha  |
| chr17 | 37407252 | 37407525 | intron (NM intron (NM  | 209     | NM_01381  | 14991  | H2-M3     | H-2M3 Hr   |
| chr5  | 1.24E+08 | 1.24E+08 | intron (NM intron (NM  | 1715    | NM_02749  | 70650  | Zcchc8    | 5730565F0  |
| chr10 | 1.27E+08 | 1.27E+08 | promoter-1promoter-1   | -320    | NM_17373  | 210035 | Tmem194   | Tmem194a   |
| chr3  | 84698477 | 84698650 | intron (NM intron (NM  | 30496   | NM_00117  | 50754  | Fbxw7     | 1110001A1  |
| chr10 | 84381177 | 84381250 | intron (NM MIRc SINE   | 855     | NM_18317  | 237422 | Ric8b     | BC051080   |
| chr3  | 67386777 | 67386850 | exon (NM_exon (NM_     | 123     | NM_02581  | 66868  | Mfsd1     | 1200003OC  |
| chr10 | 95928702 | 95928800 | Intergenic L2a LINE L  | -150884 | NM_00756  | 12226  | Btg1      | AI426953 , |
| chr4  | 1.32E+08 | 1.32E+08 | intron (NMB3A SINE     | -10645  | NM_00112  | 269587 | Epb4.1    | 4.1R AI415 |
| chr7  | 26796427 | 26796525 | Intergenic IAP-d-int L | -50038  | NM_00781  | 13089  | Cyp2b13   | -          |
| chr8  | 1.27E+08 | 1.27E+08 | intron (NM CpG         | 282     | NM_13927  | 108148 | Galnt2    | AI480629   |
| chr5  | 1.48E+08 | 1.48E+08 | promoter-1promoter-1   | -728    | NM_01964  | 19933  | Rpl21     | 8430440E0  |
| chr11 | 79391802 | 79392050 | 3' UTR (NV 3' UTR (NV  | -12788  | NM_17554  | 268451 | Rab11fip4 | A730072L0  |
| chr1  | 1.58E+08 | 1.58E+08 | promoter-1promoter-1   | -278    | NM_00116  | 208263 | Tor1aip1  | LAP1 Lap1  |
| chr18 | 58663752 | 58663900 | Intergenic Lx7 LINE L  | -52068  | NM_00108  | 225579 | Slc27a6   | 4732438L2  |
| chr2  | 1.29E+08 | 1.29E+08 | promoter-1promoter-1   | -4      | NM_00129  | 19261  | Sirpa     | AI835480 I |
| chr15 | 79963402 | 79963625 | promoter-1promoter-1   | -71     | NM_02560  | 66513  | Tab1      | 2310012M   |
| chr13 | 99086252 | 99086600 | intron (NM intron (NM  | 496     | NM_14545  | 218490 | Btf3      | 1700054E1  |
| chr12 | 88155552 | 88155950 | Intergenic Intergenic  | 70013   | NM_14583  | 238330 | Irf2bpl   | 6430527G1  |
| chr11 | 1.15E+08 | 1.15E+08 | promoter-1promoter-1   | -395    | NM_00100  | 445007 | Nup85     | Pcnt1 frou |
| chr5  | 1.24E+08 | 1.24E+08 | exon (NM_exon (NM_     | 164     | NM_02600  | 67151  | Psmd9     | 1500011J2  |
| chr1  | 64511502 | 64511650 | Intergenic Intergenic  | -67802  | NM_13382  | 12912  | Creb1     | 2310001E1  |
| chr3  | 89017602 | 89017825 | intron (NM CpG         | 544     | NM_00116  | 17827  | Mtx1      | Gcap6 Mb   |
| chr7  | 1.49E+08 | 1.49E+08 | promoter-1promoter-1   | -499    | NM_02580  | 66853  | Pnpla2    | 0610039C2  |
| chr7  | 87542952 | 87543050 | exon (NM_exon (NM_     | 4647    | NM_01104  | 18550  | Furin     | 9130404IO: |

|       |          |          |                      |            |          |           |        |           |            |
|-------|----------|----------|----------------------|------------|----------|-----------|--------|-----------|------------|
| chr15 | 76531202 | 76531275 | promoter-1promoter-1 | -734       | NM_02712 | 69572     | Mfsd3  | 2310010G1 |            |
| chr16 | 49797327 | 49797475 | Intergenic           | LTR16B1 L  | -58366   | NM_01058  | 16423  | Cd47      | 9130415E2  |
| chr10 | 85391277 | 85391475 | exon (NM_            | exon (NM_  | 140      | NM_00116  | 67341  | Ascl4     | 1700054F1  |
| chr1  | 1.68E+08 | 1.68E+08 | promoter-1promoter-1 |            | -229     | NM_00108  | 68481  | Mpzl1     | 1110007A1  |
| chr1  | 1.55E+08 | 1.55E+08 | intron (NM           | B3 SINE B  | 2643     | NM_01087  | 17970  | Ncf2      | NOXA2 Nc   |
| chr11 | 1E+08    | 1E+08    | intron (NM           | CpG        | 894      | NM_01979  | 56354  | Dnajc7    | 2010003F2  |
| chr14 | 22576852 | 22577000 | intron (NM           | intron (NM | 7173     | NM_02628  | 67630  | Samd8     | 1110053F0  |
| chr2  | 50943702 | 50943775 | Intergenic           | Intergenic | 60893    | NM_02881  | 74194  | Rnd3      | 2610017M   |
| chr11 | 55283802 | 55283875 | intron (NM           | intron (NM | 584      | NM_01371  | 27041  | G3bp1     | AI849976 I |
| chr15 | 1E+08    | 1E+08    | promoter-1promoter-1 |            | 308      | NM_01187  | 23994  | Dazap2    | AI314727 I |
| chr8  | 73219452 | 73219600 | Intergenic           | Intergenic | -2112    | NM_01059  | 16478  | Jund      | Jund1      |
| chr4  | 1.29E+08 | 1.29E+08 | promoter-1promoter-1 |            | 166      | NM_01879  | 54709  | Eif3i     | 36kDa D4E  |
| chr11 | 97745227 | 97745400 | 5' UTR (NM           | 5' UTR (NM | 155      | NM_00108  | 72973  | Fbxo47    | 2900052PC  |
| chr5  | 1.16E+08 | 1.16E+08 | Intergenic           | U4 snRNA   | -5045    | NM_13376  | 75387  | Sirt4     | 4930596O1  |
| chr9  | 59333752 | 59333825 | exon (NM_            | exon (NM_  | 393      | NM_01992  | 23806  | Arih1     | AU021774   |
| chr4  | 43978727 | 43978825 | intron (NM           | intron (NM | 8202     | NM_02745  | 384009 | Glipr2    | 5730414AC  |
| chr13 | 14732302 | 14732675 | Intergenic           | Intergenic | 9963     | NM_13406  | 105351 | AW209491- |            |
| chr4  | 1.34E+08 | 1.34E+08 | Intergenic           | B1_Mus1 :  | -30983   | NM_20723  | 230815 | Man1c1    | AI593348   |
| chr7  | 3656902  | 3657050  | intron (NM           | intron (NM | 1333     | NM_02976  | 76846  | Rps9      | 3010033PC  |
| chr1  | 60656352 | 60656475 | Intergenic           | Intergenic | -32804   | NM_00104  | 77300  | Raph1     | 9430025M   |
| chr2  | 25430852 | 25431400 | promoter-1promoter-1 |            | -735     | NM_02929  | 75454  | Phpt1     | 1700008C2  |
| chr15 | 1.01E+08 | 1.01E+08 | TTS (NM_0            | TTS (NM_0  | 6342     | NM_00120  | 1E+08  | 5430421N: | -          |
| chr11 | 82938402 | 82938700 | Intergenic           | Intergenic | 8204     | NM_01140  | 20555  | Sfn1      | AV316259   |
| chr15 | 38231877 | 38231975 | Intergenic           | Intergenic | -1460    | NM_00128  | 21847  | Klf10     | AI115143 I |
| chr14 | 19102127 | 19103950 | promoter-1promoter-1 |            | 462      | NM_02558  | 66480  | Rpl15     | 2510008HC  |
| chr7  | 1.13E+08 | 1.13E+08 | TTS (NM_0            | TTS (NM_0  | 639      | NM_02002  | 24075  | Taf10     | 30kDa AU(  |
| chr19 | 46431702 | 46431800 | intron (NM           | intron (NM | 381      | NM_02918  | 75146  | Tmem180   | 4930449AC  |
| chr15 | 50733377 | 50733650 | Intergenic           | Intergenic | -11926   | NM_03200  | 83925  | Trps1     | AI115454 , |
| chr11 | 49016877 | 49016950 | promoter-1promoter-1 |            | -89      | NM_00102  | 22720  | Zfp62     | -          |
| chr12 | 77295627 | 77295725 | Intergenic           | RMER12B    | -17430   | NR_10438( | 13983  | Esr2      | ER[b] ERbe |
| chr3  | 1.58E+08 | 1.58E+08 | promoter-1promoter-1 |            | -592     | NM_00101  | 433667 | Ankrd13c  | AI505652 , |
| chr10 | 1.08E+08 | 1.08E+08 | intron (NM           | intron (NM | 17330    | NM_00930  | 20979  | Syt1      | AW124717   |
| chr1  | 1.3E+08  | 1.3E+08  | Intergenic           | Intergenic | -4987    | NM_00991  | 12767  | Cxcr4     | CD184 Cm   |
| chr1  | 59970502 | 59970700 | intron (NM           | CpG        | 751      | NM_00103  | 72750  | Fam117b   | 2810425F2  |
| chr2  | 28695977 | 28696300 | promoter-1promoter-1 |            | 212      | NM_00103  | 227674 | Ddx31     | 5830444G1  |
| chr4  | 45653502 | 45653725 | Intergenic           | MER117 D   | -42848   | NM_00103  | 329839 | Gm829     | -          |
| chr12 | 25167952 | 25168275 | Intergenic           | Intergenic | -15333   | NM_02061  | 21340  | Taf1b     | 4930408GC  |
| chr8  | 1.29E+08 | 1.29E+08 | Intergenic           | Intergenic | -109152  | NM_00116  | 270110 | Irf2bp2   | E130305N2  |
| chr14 | 68397302 | 68397425 | intron (NM           | intron (NM | 34077    | NM_00814  | 14714  | Gnrh1     | Gnrh Gnrh  |
| chr6  | 52648102 | 52648350 | Intergenic           | Intergenic | -15497   | NM_02581  | 52440  | Tax1bp1   | 1200003J1  |
| chr4  | 1.34E+08 | 1.34E+08 | Intergenic           | Intergenic | -3264    | NM_02366  | 27981  | Rsrp1     | 2700043I2: |
| chr1  | 7078477  | 7078625  | promoter-1promoter-1 |            | -450     | NM_18302  | 319263 | Pcmt1     | 8430411F1  |
| chr2  | 91232502 | 91232600 | intron (NM           | URR1B DN   | 52248    | NM_17512  | 228356 | 1110051M  | AI586322   |
| chr6  | 17697702 | 17698075 | intron (NM           | intron (NM | -1282    | NM_00108  | 64213  | St7       | 9430001HC  |
| chr12 | 60162152 | 60162325 | 5' UTR (NM           | 5' UTR (NM | 210      | NM_03005  | 78232  | Trappc6b  | 5830498C1  |
| chr11 | 6526177  | 6526250  | promoter-1promoter-1 |            | -143     | NM_13401  | 21379  | Tbrg4     | 2310042P2  |
| chr4  | 1.29E+08 | 1.29E+08 | Intergenic           | Intergenic | -10877   | NM_18278  | 230766 | Fam167b   | SEC        |

|       |          |          |            |            |         |          |        |         |           |
|-------|----------|----------|------------|------------|---------|----------|--------|---------|-----------|
| chr6  | 1.23E+08 | 1.23E+08 | Intergenic | ID_B1 SINI | -6901   | NM_00977 | 12267  | C3ar1   | AZ3B C3AF |
| chr7  | 1.06E+08 | 1.06E+08 | promoter-1 | promoter-1 | 65      | NM_02841 | 72981  | Prkrir  | 2900052B1 |
| chr12 | 55921702 | 55922000 | Intergenic | Intergenic | -25202  | NM_02699 | 72183  | Snx6    | 2010006G2 |
| chr2  | 35790677 | 35790825 | intron (NM | L1MC4a LI  | 44393   | NM_02977 | 74410  | Ttll11  | 4932702F0 |
| chr2  | 1.58E+08 | 1.58E+08 | promoter-1 | promoter-1 | -14     | NM_17785 | 329547 | Bpi     | 9230105K1 |
| chr3  | 87847002 | 87847400 | 5' UTR (NM | 5' UTR (NM | 173     | NM_02566 | 66614  | Gpatch4 | 2610029K2 |
| chr7  | 90780602 | 90780675 | exon (NM_  | exon (NM_  | 111     | NM_02337 | 170460 | Stard5  | 2310058G2 |
| chr3  | 35653227 | 35653350 | 5' UTR (NM | 5' UTR (NM | 228     | NM_02957 | 76295  | Atp11b  | 111001914 |
| chr7  | 75293277 | 75293525 | intron (NM | intron (NM | 115718  | NM_03010 | 78444  | Pgpep1l | C330024D1 |
| chr1  | 1.29E+08 | 1.29E+08 | promoter-1 | promoter-1 | 71      | NM_00108 | 210356 | Nckap5  | 8430408F2 |
| chr11 | 82891477 | 82891800 | Intergenic | Intergenic | 13024   | NM_01140 | 20556  | Slfn2   | Shlf2     |
| chr11 | 76693177 | 76693650 | Intergenic | ID4 SINE I | -24634  | NM_02565 | 66601  | Tmigd1  | 2010002A2 |
| chr11 | 95246052 | 95246150 | promoter-1 | promoter-1 | -135    | NM_01675 | 110172 | Slc35b1 | Ugalt2    |
| chr4  | 1.15E+08 | 1.15E+08 | intron (NM | intron (NM | 12594   | NM_00100 | 81906  | Cyp4x1  | A230025G2 |
| chr13 | 1.01E+08 | 1.01E+08 | Intergenic | Intergenic | 96950   | NM_01373 | 27220  | Cartpt  | Cart      |
| chrX  | 1.39E+08 | 1.39E+08 | intron (NM | MTD LTR I  | 13090   | NM_00103 | 50790  | Acs14   | 9430020AC |
| chr4  | 86365002 | 86365400 | Intergenic | MIRb SINE  | -29258  | NM_18408 | 329877 | Dennd4c | 1700065AC |
| chr1  | 1.66E+08 | 1.66E+08 | intron (NM | intron (NM | 16948   | NM_00972 | 11931  | Atp1b1  | Atp4b Atp |
| chr8  | 89123302 | 89123450 | Intergenic | Intergenic | -24566  | NM_02582 | 66887  | Lonp2   | 1300002AC |
| chrX  | 45776652 | 45776775 | intron (NM | intron (NM | 39596   | NM_01968 | 56501  | Elf4    | AV314029  |
| chr13 | 70776427 | 70776650 | promoter-1 | promoter-1 | -26     | NM_14483 | 218333 | Ice1    | C77245 ml |
| chr1  | 1.83E+08 | 1.83E+08 | promoter-1 | promoter-1 | -123    | NM_14479 | 208795 | Tmem63a | BC014795  |
| chr4  | 1.09E+08 | 1.09E+08 | promoter-1 | promoter-1 | -161    | NM_02957 | 100087 | Kti12   | 1110001A1 |
| chr1  | 1.69E+08 | 1.69E+08 | intron (NM | CpG        | 545     | NM_03072 | 80914  | Uck2    | AA407809  |
| chr5  | 91125377 | 91125500 | Intergenic | Intergenic | -55925  | NM_02847 | 73246  | Rassf6  | 1600016B1 |
| chrX  | 54206427 | 54206525 | Intergenic | Intergenic | -89775  | NM_00976 | 12209  | Brs3    | BRS-3     |
| chr2  | 1.1E+08  | 1.1E+08  | exon (NM_  | exon (NM_  | -21198  | NM_02661 | 68201  | Ccdc34  | 281002701 |
| chr4  | 19935777 | 19936000 | intron (NM | CpG        | 313     | NM_01576 | 50500  | Ttpa    | alpha-TTP |
| chr12 | 43141327 | 43141550 | Intergenic | Intergenic | -928794 | NM_01073 | 16981  | Lrrn3   | NLRR-3    |
| chr8  | 73389477 | 73389625 | Intergenic | CpG        | 7838    | NM_02696 | 234388 | Ccdc124 | 1810023B2 |
| chr9  | 56920427 | 56920575 | promoter-1 | promoter-1 | 654     | NM_00111 | 20466  | Sin3a   | AW553200  |
| chr11 | 98590402 | 98590550 | intron (NM | intron (NM | 273     | NM_01186 | 23989  | Med24   | 911GSE Al |
| chr9  | 1.22E+08 | 1.22E+08 | intron (NM | CpG-15525  | 852     | NM_01091 | 18087  | Nktr    | 5330401F1 |
| chr6  | 1.16E+08 | 1.16E+08 | 5' UTR (NM | 5' UTR (NM | 152     | NM_02978 | 110157 | Raf1    | 6430402F1 |
| chr7  | 1.34E+08 | 1.34E+08 | intron (NM | CpG        | 447     | NM_01967 | 56420  | Ppp4c   | 1110002DC |
| chr18 | 21126827 | 21126950 | intron (NM | intron (NM | 23762   | NM_02630 | 67664  | Rnf125  | 4930553F0 |
| chr13 | 95071177 | 95071250 | Intergenic | Intergenic | -15977  | NM_02915 | 107767 | Scamp1  | 4930505M  |
| chr5  | 1.26E+08 | 1.26E+08 | intron (NM | CpG        | 258     | NM_00125 | 20602  | Ncor2   | N-CoR SMI |
| chr4  | 1.41E+08 | 1.41E+08 | intron (NM | CpG        | 521     | NM_00101 | 68817  | Ddi2    | 1110056G1 |
| chr2  | 60645677 | 60646000 | intron (NM | intron (NM | 73657   | NM_00114 | 56878  | Rbms1   | 2600014B1 |
| chr4  | 94073227 | 94073400 | Intergenic | Intergenic | 150174  | NM_02636 | 67770  | Caap1   | 5830433M  |
| chr5  | 73306927 | 73307025 | intron (NM | intron (NM | 1375    | NM_15356 | 75991  | Slain2  | 5033405K1 |
| chr1  | 1.54E+08 | 1.54E+08 | intron (NM | intron (NM | 25678   | NM_01684 | 19731  | Rgl1    | Rgl mKIAA |
| chr19 | 41459502 | 41459575 | promoter-1 | promoter-1 | 22      | NM_03137 | 83490  | Pik3ap1 | 1810044J0 |
| chr11 | 72363602 | 72363825 | promoter-1 | promoter-1 | 35      | NM_02993 | 77577  | Spns3   | 983000211 |
| chr9  | 1.06E+08 | 1.06E+08 | exon (NM_  | exon (NM_  | 488     | NM_15345 | 235584 | Dusp7   | AU015694  |
| chr3  | 51287652 | 51287800 | promoter-1 | promoter-1 | -162    | NM_01685 | 19338  | Rab33b  | -         |



|       |          |          |                     |            |         |          |        |           |            |
|-------|----------|----------|---------------------|------------|---------|----------|--------|-----------|------------|
| chr19 | 33167052 | 33167400 | Intergenic          | Intergenic | 299559  | NM_00116 | 67795  | Rnls      | 6530404N2  |
| chr15 | 31268677 | 31268950 | intron (NML1MB4 LIN |            | 28701   | NM_00116 | 67434  | Ankrd33b  | 0610012AC  |
| chr9  | 52055002 | 52055150 | Intergenic          | Intergenic | -78860  | NM_00116 | 244871 | Zc3h12c   | A230108EC  |
| chr15 | 34026202 | 34026375 | intron (NMPB1D9 SIN |            | 13814   | NM_02600 | 67154  | Mtdh      | 2610103J2  |
| chr2  | 59720252 | 59720425 | intron (NMCpG       |            | 325     | NM_00115 | 72137  | Wdsub1    | 1700048E1  |
| chr4  | 1.18E+08 | 1.18E+08 | intron (NM          | intron (NM | 17501   | NM_01121 | 19268  | Ptprf     | AA591035   |
| chr2  | 1.29E+08 | 1.29E+08 | intron (NM          | intron (NM | 10550   | NM_17765 | 228592 | F830045P1 | Sirpb3     |
| chr13 | 32084727 | 32085075 | intron (NM          | intron (NM | 186386  | NM_00859 | 17300  | Foxc1     | FREAC3 Fk  |
| chr9  | 21920677 | 21920750 | Intergenic          | Intergenic | -2100   | NM_17077 | 66126  | Elof1     | 1110011K1  |
| chr13 | 20164877 | 20165075 | Intergenic          | Intergenic | -17400  | NM_08028 | 140580 | Elmo1     | 6330578D2  |
| chr4  | 4017002  | 4017075  | Intergenic          | Lx6 LINE L | -12377  | NM_00108 | 242286 | Sdr16c6   | 4833413O1  |
| chr7  | 1.25E+08 | 1.25E+08 | promoter-1          | promoter-1 | 450     | NM_00103 | 233789 | Smg1      | 2610207IO  |
| chr11 | 72951352 | 72951600 | exon (NM_           | exon (NM_  | 320     | NM_01035 | 14841  | Gsg2      | Haspin     |
| chr19 | 12575877 | 12576125 | 5' UTR (NM          | 5' UTR (NM | 485     | NM_17244 | 207521 | Dtx4      | AI449438 I |
| chr1  | 55144877 | 55144950 | promoter-1          | promoter-1 | -79     | NM_00830 | 15528  | Hspe1     | 10kDa Hsp  |
| chr1  | 1.65E+08 | 1.65E+08 | intron (NMEtERV3-ir |            | 12259   | NM_00803 | 14262  | Fmo3      | AW111792   |
| chr3  | 89225877 | 89225950 | exon (NM_           | exon (NM_  | 370     | NM_00111 | 20416  | Shc1      | Shc ShcA I |
| chr11 | 34678752 | 34678950 | Intergenic          | Intergenic | -31708  | NM_02741 | 70385  | Spdl1     | 1700018IO  |
| chr17 | 56855827 | 56855925 | intron (NM          | ID_B1 SIN  | 468     | NM_17892 | 106639 | Vmac      | AI662250   |
| chr7  | 77791777 | 77792025 | Intergenic          | Intergenic | -280269 | NM_18326 | 11819  | Nr2f2     | 2700033KC  |
| chr2  | 1.68E+08 | 1.68E+08 | promoter-1          | promoter-1 | -264    | NM_00962 | 11538  | Adnp      | AA589558   |
| chr10 | 87875152 | 87875300 | intron (NM          | intron (NM | 33069   | NM_00100 | 432486 | Gnptab    | EG432486   |
| chr6  | 1.15E+08 | 1.15E+08 | Intergenic          | Intergenic | -33071  | NM_19903 | 381802 | Tsen2     | AU067695   |
| chr17 | 35325327 | 35325400 | promoter-1          | promoter-1 | 22      | NM_01073 | 16988  | Lst1      | B144       |
| chr19 | 5769077  | 5769175  | intron (NM          | MER2 DNA   | 2275    | NM_02391 | 78891  | Scyl1     | 2810011O1  |
| chr19 | 29441402 | 29442075 | promoter-1          | promoter-1 | -190    | NM_02189 | 60533  | Cd274     | A530045L1  |
| chr13 | 76620552 | 76620775 | intron (NM          | intron (NM | 98254   | NM_03017 | 78771  | Mctp1     | 2810465F1  |
| chr1  | 1.89E+08 | 1.89E+08 | intron (NM          | intron (NM | 13661   | NM_02604 | 67223  | Rrp15     | 2810430M   |
| chr3  | 86351177 | 86351250 | exon (NM_           | exon (NM_  | 992     | NM_01183 | 23937  | Mab21l2   | -          |
| chr11 | 83285977 | 83286200 | promoter-1          | promoter-1 | -522    | NM_02742 | 70439  | Taf15     | 2610111C2  |
| chr5  | 1.04E+08 | 1.04E+08 | intron (NM          | intron (NM | 7884    | NM_00108 | 17355  | Aff1      | 9630032BC  |
| chr8  | 88083252 | 88083375 | Intergenic          | RSINE1 SIN | -4143   | NM_01979 | 56445  | Dnaja2    | 1500017M   |
| chr2  | 1.53E+08 | 1.53E+08 | Intergenic          | Intergenic | 7556    | NM_01022 | 14239  | Foxs1     | FREAC10 F  |
| chr17 | 34088252 | 34088600 | promoter-1          | promoter-1 | 7       | NM_01942 | 54218  | B3galt4   | Gal-T2 Gal |
| chr4  | 1.26E+08 | 1.26E+08 | intron (NMCpG       |            | 266     | NM_14615 | 230753 | Thrap3    | 9330151F0  |
| chr12 | 76392677 | 76392875 | Intergenic          | RMER19B    | -16524  | NM_02327 | 80837  | Rhoj      | 1110005O1  |
| chr18 | 77304827 | 77304900 | intron (NM          | intron (NM | 444     | NM_00116 | 17344  | Pias2     | 6330408K1  |
| chr11 | 4346602  | 4346700  | Intergenic          | Intergenic | -5566   | NM_02945 | 75828  | Hormad2   | 4930529M   |
| chr10 | 98409802 | 98409875 | intron (NM          | intron (NM | 32052   | NM_02648 | 67972  | Atp2b1    | 2810442I2  |
| chr16 | 5233702  | 5233900  | promoter-1          | promoter-1 | 87      | NM_14536 | 208211 | Alg1      | HMAT1 HM   |
| chr1  | 16092977 | 16094975 | intron (NM          | intron (NM | 538     | NM_01129 | 19989  | Rpl7      | Rpl7a Surf |
| chr2  | 68746102 | 68746475 | intron (NMR         | MER15 L    | 46674   | NM_17285 | 241447 | Cers6     | 4732462CC  |
| chr7  | 3249577  | 3249750  | promoter-1          | promoter-1 | 78      | NM_00103 | 378425 | Nlrp12    | Nalp12 PY  |
| chr5  | 68219777 | 68220000 | intron (NM          | MLT1A LTF  | 18782   | NM_00128 | 11980  | Atp8a1    | AI481521 , |
| chr2  | 1.68E+08 | 1.68E+08 | intron (NM          | intron (NM | 452     | NM_00129 | 18019  | Nfatc2    | AI607462 I |
| chr6  | 1.25E+08 | 1.25E+08 | Intergenic          | CpG        | -3271   | NM_01353 | 14794  | Spsb2     | AI461677 I |
| chr5  | 1.39E+08 | 1.39E+08 | promoter-1          | promoter-1 | -87     | NM_00931 | 21343  | Taf6      | 80kDa AW   |

|       |          |          |                        |         |          |        |            |            |
|-------|----------|----------|------------------------|---------|----------|--------|------------|------------|
| chr13 | 37098652 | 37098825 | intron (NML1MC4 LIN    | 42344   | NM_02878 | 74145  | F13a1      | 120001410: |
| chr12 | 73591052 | 73591300 | intron (NMRLTR19 LT    | -46168  | NM_02632 | 67708  | Pcnx14     | 1810048J1  |
| chr5  | 1.15E+08 | 1.15E+08 | 5' UTR (NM 5' UTR (NM  | 175     | NM_02999 | 77832  | Tchp       | A930031F1  |
| chr17 | 33821602 | 33822250 | TTS (NM_1 TTS (NM_1    | 477     | NM_00110 | 76936  | Hnrnpm     | 2610023M   |
| chr5  | 99766277 | 99766550 | intron (NR_intron (NR_ | -84467  | NM_14583 | 320292 | Rasgef1b   | 47324520C  |
| chr16 | 25784377 | 25784500 | intron (NMintron (NM   | -17564  | NM_00112 | 22061  | Trp63      | AI462811 I |
| chr4  | 3501702  | 3501925  | promoter-1promoter-1   | 102     | NM_02809 | 72098  | Tmem68     | 2010300G1  |
| chr7  | 54050752 | 54051625 | promoter-1promoter-1   | 63      | NM_00100 | 246694 | Hps5       | AI646796 , |
| chr18 | 4288027  | 4288100  | Intergenic L1MB2 LIN   | 64888   | NM_00774 | 26410  | Map3k8     | Cot Cot/Tp |
| chr13 | 28509052 | 28509200 | Intergenic Intergenic  | 274773  | NM_02374 | 28078  | Pr15a1     | 1600013PC  |
| chr15 | 72920827 | 72921100 | exon (NM_exon (NM_     | 121     | NM_05306 | 93696  | Chrac1     | 2410152E0  |
| chr12 | 9036152  | 9037200  | promoter-1promoter-1   | -127    | NM_02932 | 75516  | Ttc32      | 1700013G2  |
| chr10 | 79265252 | 79265375 | intron (NMMIR SINE     | 8996    | NM_00116 | 18483  | Palm       | -          |
| chr7  | 25102027 | 25102150 | promoter-1promoter-1   | -403    | NM_00119 | 22756  | Zfp94      | -          |
| chr15 | 96890452 | 96890825 | Intergenic Intergenic  | -4251   | NM_02705 | 69354  | Slc38a4    | 1110012E1  |
| chrX  | 1.29E+08 | 1.29E+08 | Intergenic Lx9 LINE L  | 1443594 | NM_00110 | 279653 | Pcdh19     | B530002L0  |
| chr9  | 79831502 | 79831625 | Intergenic Intergenic  | -5874   | NM_00108 | 70598  | Filip1     | 5730485H2  |
| chr17 | 35653327 | 35653775 | promoter-1promoter-1   | 218     | NM_00116 | 106795 | Tcf19      | 5730403J1  |
| chr15 | 54403977 | 54404125 | intron (NMintron (NM   | 1130    | NM_17892 | 105853 | Mal2       | AI461653   |
| chr11 | 58120952 | 58121175 | 5' UTR (NV 5' UTR (NV  | 492     | NM_00104 | 103836 | Zfp692     | AI746306 , |
| chr19 | 3562777  | 3562900  | intron (NML1ME3B LI    | 12911   | NM_00116 | 52036  | Ppp6r3     | 4930528GC  |
| chr3  | 27555802 | 27555900 | intron (NMintron (NM   | 53510   | NM_17318 | 72007  | Fndc3b     | 16000190C  |
| chr8  | 80327327 | 80327475 | Intergenic Intergenic  | -79050  | NM_01033 | 13617  | Ednra      | ET-AR ETa  |
| chr9  | 20264127 | 20264225 | intron (NMCpG          | 428     | NM_01175 | 22688  | Zfp26      | 5033428CC  |
| chrX  | 55530602 | 55530850 | Intergenic Intergenic  | 246921  | NM_00957 | 22773  | Zic3       | Bn Ka      |
| chr3  | 1.19E+08 | 1.19E+08 | intron (NMCpG          | 668     | NM_01955 | 56195  | Ptbp2      | Ptb2 brPTf |
| chr12 | 4483177  | 4483325  | intron (NMintron (NM   | 809     | NM_01088 | 17977  | Ncoa1      | KAT13A SF  |
| chr9  | 20684402 | 20684475 | promoter-1promoter-1   | -284    | NM_14515 | 70726  | Angptl6    | 6330404E1  |
| chr10 | 1.25E+08 | 1.25E+08 | exon (NM_exon (NM_     | 401     | NM_17715 | 320398 | Lrig3      | 9030421L1  |
| chr11 | 1.18E+08 | 1.18E+08 | intron (NMintron (NM   | 23597   | NM_02144 | 58251  | BC100451   | Ddc8 FS39  |
| chr8  | 1.1E+08  | 1.1E+08  | promoter-1promoter-1   | -210    | NM_02555 | 66427  | Cyb5b      | 1810044O2  |
| chr1  | 1.36E+08 | 1.36E+08 | Intergenic RSINE1 SIN  | 15714   | NM_14551 | 98710  | Rabif      | AI842864 , |
| chr1  | 1.8E+08  | 1.8E+08  | Intergenic L1M5 LINE   | -15719  | NM_02707 | 69428  | 1700016C1- |            |
| chr16 | 18628652 | 18628800 | intron (NMintron (NM   | 1305    | NM_21361 | 18951  | 5-Sep      | Cdcrel-1 C |
| chr1  | 1.37E+08 | 1.37E+08 | intron (NMintron (NM   | 163     | NM_01159 | 21854  | Timm17a    | 17kDa mTi  |
| chr19 | 21848127 | 21848250 | Intergenic Intergenic  | -4642   | NM_00103 | 83921  | Tmem2      | -          |
| chr3  | 87946427 | 87946825 | intron (NMCpG          | 309     | NM_13366 | 17261  | Mef2d      | C80750     |
| chr9  | 67272077 | 67272175 | intron (NMintron (NM   | 135384  | NM_00108 | 70549  | Tln2       | 5730421PC  |
| chr8  | 1.24E+08 | 1.24E+08 | intron (NMintron (NM   | 746     | NM_00128 | 53325  | Banp       | AA408158   |
| chr17 | 28345727 | 28345850 | intron (NMintron (NM   | 1065    | NM_02718 | 23853  | Def6       | 2410003F0  |
| chr3  | 64991877 | 64992075 | promoter-1promoter-1   | -49     | NM_00128 | 16497  | Kcnab1     | Akr8a8 Kvl |
| chr10 | 67264952 | 67265225 | Intergenic Intergenic  | 110322  | NM_17867 | 216049 | Zfp365     | AI839779 , |
| chr6  | 39228377 | 39228700 | Intergenic Intergenic  | -71766  | NM_00103 | 338523 | Kdm7a      | A630082K2  |
| chr2  | 72389302 | 72389650 | Intergenic MER46C D    | 75200   | NM_02586 | 66953  | Cdca7      | 2310021GC  |
| chr9  | 1.24E+08 | 1.24E+08 | Intergenic Intergenic  | -3909   | NM_00987 | 12581  | Cdkn2d     | INK4d p19  |
| chr1  | 93945027 | 93945200 | intron (NMintron (NM   | 99857   | NM_20722 | 208727 | Hdac4      | 4932408F1  |
| chr18 | 55008152 | 55008300 | Intergenic Intergenic  | 141608  | NM_17575 | 269023 | Zfp608     | 4932417D1  |

|       |          |          |             |             |         |           |        |            |            |
|-------|----------|----------|-------------|-------------|---------|-----------|--------|------------|------------|
| chr13 | 93614552 | 93614975 | promoter-1  | promoter-1  | 21      | NM_00116  | 382793 | Mtx3       | 493047001  |
| chr11 | 96912202 | 96912400 | intron (NM  | intron (NM  | 167     | NM_00108  | 71240  | Osbpl7     | 4933437E1  |
| chr17 | 15567777 | 15567875 | intron (NR_ | intron (NR_ | 34616   | NM_02420  | 67544  | Fam120b    | 4932442KC  |
| chr16 | 11322702 | 11322800 | promoter-1  | promoter-1  | -246    | NM_02896  | 74478  | Snx29      | 4933437K1  |
| chrX  | 92639802 | 92639875 | intron (NM  | CpG         | 341     | NM_17517  | 72345  | Amer1      | 2810002OC  |
| chr13 | 29883952 | 29884075 | intron (NM  | ORR1D2 L    | 63444   | NM_14453  | 68916  | Cdkal1     | 1190005BC  |
| chr9  | 90134927 | 90135075 | intron (NM  | L1MB8 LIN   | 30606   | NM_19433  | 67016  | Tbc1d2b    | 1810061M   |
| chr4  | 1.23E+08 | 1.23E+08 | intron (NM  | intron (NM  | 1073    | NM_02587  | 66966  | Trit1      | 2310075G1  |
| chr4  | 1.49E+08 | 1.49E+08 | intron (NM  | intron (NM  | 1907    | NM_00129  | 100198 | H6pd       | AI785303 c |
| chr17 | 46909552 | 46909800 | promoter-1  | promoter-1  | 92      | NM_02596  | 67101  | 2310039HC- |            |
| chr19 | 57447777 | 57447850 | exon (NM_   | exon (NM_   | 12314   | NM_14550  | 226252 | Fam160b1   | AI450540 i |
| chr2  | 1.19E+08 | 1.19E+08 | promoter-1  | promoter-1  | -970    | NM_13913  | 69408  | Dnajc17    | 1700025B1  |
| chrX  | 1.33E+08 | 1.33E+08 | intron (NR_ | intron (NR_ | -5001   | NM_00116  | 56397  | Morf4l2    | 2410017O1  |
| chr10 | 41315402 | 41315700 | Intergenic  | Intergenic  | -7992   | NM_00117  | 75973  | Ccdc162    | 5033413D2  |
| chr2  | 5765752  | 5766375  | promoter-1  | promoter-1  | -17     | NM_01691  | 53893  | Nudt5      | -          |
| chr6  | 98980077 | 98980275 | intron (NM  | intron (NM  | -1884   | NM_00119  | 108655 | Foxp1      | 3110052D1  |
| chr12 | 81955727 | 81955950 | intron (NM  | intron (NM  | 64319   | NM_00124  | 217684 | 4933426M   | mKIAA024:  |
| chr17 | 47660252 | 47660375 | intron (NM  | intron (NM  | 18313   | NM_00108  | 12445  | Ccnd3      | 9230106BC  |
| chr2  | 1.46E+08 | 1.46E+08 | 5' UTR (NM  | 5' UTR (NM  | 255     | NM_01688  | 53626  | Insm1      | IA-1       |
| chr6  | 1.37E+08 | 1.37E+08 | Intergenic  | Intergenic  | 39257   | NM_02389  | 78600  | Pde6h      | A930033D:  |
| chr5  | 74121052 | 74121175 | Intergenic  | Intergenic  | 78494   | NM_17838  | 73472  | Spata18    | 170006710: |
| chr7  | 1.09E+08 | 1.09E+08 | promoter-1  | promoter-1  | 167     | NM_00124  | 207728 | Pde2a      | CGS-PDE c  |
| chr19 | 5572727  | 5572975  | Intergenic  | Intergenic  | 4777    | NM_00103  | 381201 | Ap5b1      | Gm962      |
| chr15 | 1.02E+08 | 1.02E+08 | intron (NM  | intron (NM  | 2955    | NM_00104  | 19411  | Rarg       | Nr1b3 RAF  |
| chr8  | 92204577 | 92205150 | Intergenic  | Intergenic  | -636802 | NM_02139  | 58198  | Sall1      | Msal-3     |
| chr8  | 1.29E+08 | 1.29E+08 | Intergenic  | Intergenic  | 113470  | NM_02421  | 67952  | Tomm20     | 1810060KC  |
| chr1  | 58480427 | 58480775 | intron (NR_ | CpG         | 331     | NR_02785: | 12747  | Clk1       | STY        |
| chr9  | 1.2E+08  | 1.2E+08  | intron (NM  | intron (NM  | 6077    | NM_02873  | 74052  | Ttc21a     | 4921538N1  |
| chr13 | 41563727 | 41563800 | intron (NM  | intron (NM  | 18966   | NM_00111  | 18003  | Nedd9      | Cas-L CasL |
| chr1  | 1.84E+08 | 1.84E+08 | intron (NM  | intron (NM  | 7649    | NM_17512  | 67948  | Fbxo28     | 4833428J1  |
| chr5  | 98393477 | 98393725 | intron (NM  | intron (NM  | 66380   | NM_13373  | 71914  | Antxr2     | 2310046B1  |
| chr2  | 72204602 | 72204875 | intron (NM  | intron (NM  | 80980   | NM_17808  | 65964  | Zak        | AV006891   |
| chr6  | 1.25E+08 | 1.25E+08 | intron (NM  | CpG         | 397     | NM_00765  | 12527  | Cd9        | Tspan29    |
| chr2  | 72038552 | 72038775 | intron (NM  | intron (NM  | -85031  | NM_02305  | 65964  | Zak        | AV006891   |
| chr11 | 18667602 | 18667725 | Intergenic  | Intergenic  | 251309  | NM_00119  | 17268  | Meis1      | C530044H1  |
| chr11 | 3830077  | 3830275  | intron (NM  | intron (NM  | 1788    | NM_00113  | 21452  | Tcn2       | AW208754   |
| chr5  | 1.06E+08 | 1.06E+08 | intron (NM  | MIRb SINE   | 29897   | NM_17870  | 231549 | Lrrc8d     | 2810473GC  |
| chr6  | 87995102 | 87995250 | promoter-1  | promoter-1  | 88      | NM_00129  | 19349  | Rab7       | Rab7a      |
| chr15 | 80623027 | 80623375 | intron (NM  | Lx8 LINE L  | -5839   | NM_17712  | 213988 | Tnrc6b     | 2700090M   |
| chr8  | 82849277 | 82849375 | Intergenic  | Intergenic  | -168618 | NM_01036  | 14934  | Gypa       | AI853584 c |
| chr3  | 1.36E+08 | 1.37E+08 | intron (NM  | AT_rich Lo  | 166808  | NM_00129  | 19055  | Ppp3ca     | 2900074D1  |
| chr3  | 27836077 | 27836450 | Intergenic  | Intergenic  | -1339   | NM_00116  | 18805  | Pld1       | AA536939   |
| chr4  | 1.09E+08 | 1.09E+08 | promoter-1  | promoter-1  | -617    | NM_15339  | 230603 | Ttc39a     | 4922503NC  |
| chr10 | 19843227 | 19843375 | intron (NM  | intron (NM  | -25425  | NM_00863  | 17761  | Map7       | E-MAP-115  |
| chr2  | 13466152 | 13466300 | promoter-1  | promoter-1  | 65      | NM_01006  | 13434  | Trdmt1     | Dnmt2 Rni  |
| chr7  | 91927877 | 91928050 | Intergenic  | Intergenic  | -74118  | NM_14641  | 258410 | Olfr291    | MOR254-2   |
| chr12 | 1.19E+08 | 1.19E+08 | intron (NM  | intron (NM  | 711     | NM_17593  | 217944 | Rapgef5    | 4932413M   |

|       |          |          |            |            |         |          |        |            |            |
|-------|----------|----------|------------|------------|---------|----------|--------|------------|------------|
| chr5  | 1.5E+08  | 1.5E+08  | Intergenic | Intergenic | -18821  | NM_00966 | 11690  | Alox5ap    | Flap       |
| chr13 | 17787327 | 17787425 | promoter-1 | promoter-1 | 129     | NM_02547 | 66308  | Mplkip     | 2810021BC  |
| chr2  | 91806502 | 91806675 | Intergenic | L2a LINE L | -2868   | NM_13830 | 104418 | Dgkz       | E130307BC  |
| chr2  | 1.5E+08  | 1.5E+08  | promoter-1 | promoter-1 | -100    | NM_08057 | 68738  | Acss1      | 111003201  |
| chr6  | 87799977 | 87800125 | intron (NM | intron (NM | 1049    | NM_00110 | 12785  | Cnbp       | AA408710   |
| chr8  | 74116227 | 74116750 | 5' UTR (NM | 5' UTR (NM | 405     | NM_00129 | 66171  | Pgls       | 1110030KC  |
| chr17 | 66449552 | 66449725 | intron (NM | intron (NM | 1261    | NM_00127 | 72900  | Ndufv2     | 2900010C2  |
| chr9  | 1.07E+08 | 1.07E+08 | TTS (NM_1  | TTS (NM_1  | 252     | NM_02590 | 15983  | Ifrd2      | 1810034A2  |
| chr9  | 11103552 | 11103650 | Intergenic | ETnERV2-ir | -198826 | NM_00117 | 244682 | Cntn5      | 672042601  |
| chr9  | 72471402 | 72471875 | TTS (NM_0  | TTS (NM_0  | -38516  | NM_01089 | 17999  | Nedd4      | AA959633   |
| chr1  | 39634177 | 39634600 | promoter-1 | promoter-1 | -196    | NM_00103 | 67702  | Rnf149     | 1600023E1  |
| chr17 | 71966077 | 71966275 | intron (NM | CpG        | 621     | NM_17563 | 72515  | Wdr43      | 2610318GC  |
| chr1  | 59727377 | 59727850 | promoter-1 | promoter-1 | 65      | NM_00946 | 22218  | Sumo1      | GMP1 PIC:  |
| chr13 | 19885677 | 19886125 | intron (NM | intron (NM | 30225   | NM_18175 | 353346 | Gpr141     | PGR13      |
| chr18 | 34936727 | 34937025 | exon (NM_  | exon (NM_  | 214     | NM_00108 | 277250 | Kdm3b      | 583046212: |
| chr1  | 1.67E+08 | 1.67E+08 | intron (NM | CpG        | 368     | NM_02875 | 74106  | Dcaf6      | 1200006M   |
| chr10 | 79614502 | 79614600 | intron (NM | intron (NM | 3516    | NM_02156 | 59090  | Midn       | 3000003C1  |
| chr7  | 1.17E+08 | 1.17E+08 | promoter-1 | promoter-1 | -175    | NM_02061 | 57373  | Akip1      | BCA3 C11c  |
| chr15 | 1.02E+08 | 1.02E+08 | intron (NM | CpG        | 275     | NM_00117 | 18521  | Pcbp2      | AW412548   |
| chr14 | 66861852 | 66861950 | intron (NM | intron (NM | -29512  | NM_00116 | 19229  | Ptk2b      | CADTK CAI  |
| chr7  | 71197427 | 71197625 | Intergenic | MLT1H2 L   | -101195 | NM_00103 | 17364  | Trpm1      | 4732499L0  |
| chr17 | 51318202 | 51318275 | intron (NM | CpG        | 439     | NM_02816 | 72238  | Tbc1d5     | 1600014NC  |
| chr15 | 85801152 | 85801250 | intron (NM | URR1A DN   | 63006   | NM_00988 | 12614  | Celsr1     | Crsh Scy c |
| chr2  | 1.35E+08 | 1.35E+08 | Intergenic | L1MB7 LIN  | -29974  | NM_01967 | 18795  | Plcb1      | 311004312: |
| chr10 | 1.16E+08 | 1.16E+08 | intron (NM | intron (NM | 3919    | NM_00116 | 19279  | Ptprr      | Gmcp1 PT   |
| chr15 | 76369977 | 76370050 | promoter-1 | promoter-1 | 640     | NM_02964 | 52710  | Slc52a2    | 2010003PC  |
| chr11 | 51502202 | 51502650 | promoter-1 | promoter-1 | -290    | NM_02531 | 66050  | 0610009B2- |            |
| chr8  | 1.27E+08 | 1.27E+08 | intron (NM | intron (NM | 24327   | NM_00111 | 244666 | Sprtn      | Gm505      |
| chr4  | 1.54E+08 | 1.54E+08 | Intergenic | Intergenic | -12324  | NM_02558 | 66469  | Fam213b    | 2810405KC  |
| chr14 | 75045002 | 75045125 | intron (NM | intron (NM | 4416    | NM_17281 | 15558  | Htr2a      | E030013E0  |
| chr16 | 18812452 | 18812550 | promoter-1 | promoter-1 | 114     | NM_01167 | 22230  | Ufd1l      | Ufd1       |
| chr5  | 1.25E+08 | 1.25E+08 | TTS (NM_0  | TTS (NM_0  | 284     | NM_14450 | 65105  | Arl6ip4    | AA408210   |
| chr9  | 40965627 | 40965825 | promoter-1 | promoter-1 | -149    | NM_17686 | 72828  | Ubash3b    | 281045710  |
| chr16 | 17891227 | 17891300 | intron (NM | CpG        | 558     | NM_01004 | 13356  | Dgcr2      | 99300340   |
| chr6  | 49024077 | 49024150 | intron (NM | CpG        | 319     | NM_02935 | 75593  | Malsu1     | 2410003K1  |
| chr8  | 1.29E+08 | 1.29E+08 | TTS (NM_0  | TTS (NM_0  | 5210    | NM_00116 | 270110 | Irf2bp2    | E130305N2  |
| chr1  | 95298277 | 95298525 | exon (NM_  | exon (NM_  | 27928   | NM_00127 | 404545 | Ano7       | Ngep Ngep  |
| chr18 | 20870327 | 20870450 | intron (NM | intron (NM | 34517   | NM_01973 | 56386  | B4galt6    | AA536803   |
| chr6  | 1.13E+08 | 1.13E+08 | intron (NM | intron (NM | 655     | NM_02838 | 72895  | Setd5      | 2900045NC  |
| chr1  | 1.46E+08 | 1.46E+08 | promoter-1 | promoter-1 | -203    | NM_00103 | 69367  | Glr2       | 1700010P2  |
| chr6  | 87801177 | 87801375 | promoter-1 | promoter-1 | -176    | NM_00110 | 12785  | Cnbp       | AA408710   |
| chr1  | 64151302 | 64151450 | intron (NM | Lx8 LINE L | 16587   | NM_03356 | 93691  | Klf7       | 9830124PC  |
| chr1  | 1.82E+08 | 1.82E+08 | intron (NM | intron (NM | 413     | NM_02334 | 67426  | Adck3      | 4632432J1  |
| chr7  | 1.3E+08  | 1.3E+08  | intron (NM | CpG        | 564     | NM_14492 | 233833 | Tnrc6a     | 201032110  |
| chrX  | 50265377 | 50265500 | promoter-1 | promoter-1 | 47      | NM_00129 | 70998  | Phf6       | 2700007B1  |
| chr2  | 51928502 | 51928725 | intron (NM | CpG        | 256     | NM_17523 | 51869  | Rif1       | 5730435J0  |
| chr1  | 1.73E+08 | 1.73E+08 | 3' UTR (NM | 3' UTR (NM | 25934   | NM_17264 | 16456  | F11r       | 9130004G2  |

|       |          |          |                     |             |         |           |        |            |            |
|-------|----------|----------|---------------------|-------------|---------|-----------|--------|------------|------------|
| chr14 | 77719327 | 77719400 | intron (NM          | intron (NM  | 162793  | NM_17281  | 239188 | Enox1      | B230207J0  |
| chr12 | 86680152 | 86680500 | promoter-1          | promoter-1  | -14     | NM_14513  | 217718 | Nek9       | C130021HC  |
| chr2  | 1.53E+08 | 1.53E+08 | intron (NML1ME1 LIN |             | 9251    | NM_13384  | 99237  | Tm9sf4     | AA986553   |
| chr9  | 24955752 | 24956125 | 5' UTR (NM          | 5' UTR (NM  | 342     | NM_02058  | 80517  | Herpud2    | 5031400M   |
| chr11 | 97888327 | 97888600 | intron (NM          | CpG         | 225     | NM_00907  | 19921  | Rpl19      | -          |
| chr11 | 1.02E+08 | 1.02E+08 | intron (NM          | CpG-2642    | 398     | NM_00881  | 18612  | Etv4       | AW414408   |
| chr6  | 1.4E+08  | 1.4E+08  | intron (NM          | intron (NM  | 20272   | NM_01108  | 18705  | Pik3c2g    | C80387 PI: |
| chr9  | 54997477 | 54997625 | exon (NM_           | exon (NM_   | 375     | NM_18060  | 109161 | Ube2q2     | 3010021M   |
| chr2  | 1.56E+08 | 1.56E+08 | promoter-1          | promoter-1  | -527    | NM_13324  | 170791 | Rbm39      | 1500012C1  |
| chr13 | 1.05E+08 | 1.05E+08 | intron (NR_         | intron (NR_ | 458     | NM_02587  | 66975  | Trappc13   | 2410002O:  |
| chr11 | 75547927 | 75548000 | intron (NM          | intron (NM  | 1574    | NM_00953  | 22627  | Ywhae      | AU019196   |
| chr2  | 6243352  | 6243750  | promoter-1          | promoter-1  | -252    | NM_00108  | 98910  | Usp6nl     | AI316785 I |
| chr10 | 1.26E+08 | 1.26E+08 | promoter-1          | promoter-1  | 350     | NM_01079  | 17299  | Mettl1     | 2810012DC  |
| chr6  | 87445777 | 87445850 | intron (NM          | intron (NM  | 508     | NR_10448: | 232201 | Arhgap25   | A130039I2: |
| chr8  | 87548802 | 87548975 | intron (NM          | intron (NM  | 289     | NM_01965  | 56495  | Asna1      | 1810048H2  |
| chr11 | 1.06E+08 | 1.06E+08 | Intergenic          | MT2A LTR    | -1919   | NM_19829  | 21763  | Tex2       | 4930568E0  |
| chr7  | 25791402 | 25792075 | promoter-1          | promoter-1  | -782    | NM_00129  | 232975 | Atp1a3     | Atpa-2     |
| chr11 | 17922227 | 17922325 | Intergenic          | Intergenic  | -68398  | NM_02657  | 68145  | Etaa1      | 5730466H2  |
| chr2  | 1.67E+08 | 1.67E+08 | intron (NM          | intron (NM  | 12106   | NM_14553  | 407243 | Tmem189    | AI840826 I |
| chr3  | 1.16E+08 | 1.16E+08 | promoter-1          | promoter-1  | 97      | NM_14490  | 229782 | Slc35a3    | 2310050P1  |
| chr5  | 35995977 | 35996050 | intron (NM          | intron (NM  | 26416   | NM_00104  | 78558  | Htra3      | 2210021K2  |
| chr18 | 36434902 | 36434975 | Intergenic          | B4 SINE B:  | -5878   | NM_00898  | 19290  | Pura       | CAGER-1 P  |
| chr10 | 1.28E+08 | 1.28E+08 | promoter-1          | promoter-1  | -619    | NM_02887  | 74330  | Dnajc14    | 5730551F1  |
| chr2  | 71652152 | 71652400 | intron (NM          | intron (NM  | 27280   | NM_00127  | 16403  | Itga6      | 5033401OC  |
| chr10 | 39977702 | 39977875 | promoter-1          | promoter-1  | -317    | NM_02611  | 67371  | Gtf3c6     | 2410016F1  |
| chr2  | 25228102 | 25228175 | exon (NM_           | exon (NM_   | 583     | NM_00108  | 72080  | Sapcd2     | 2010317E2  |
| chr1  | 94121852 | 94122250 | Intergenic          | Intergenic  | -77081  | NM_20722  | 208727 | Hdac4      | 4932408F1  |
| chr4  | 1.47E+08 | 1.47E+08 | intron (NM          | CpG         | 160     | NM_00964  | 11610  | Agtrap     | 3300002E1  |
| chr13 | 37711827 | 37711900 | Intergenic          | Intergenic  | -206044 | NM_02683  | 68750  | Rreb1      | 1110037NC  |
| chr1  | 10315977 | 10316100 | intron (NM          | intron (NM  | -93287  | NM_00110  | 211673 | Arfgef1    | ARFGEP1 E  |
| chrX  | 12857352 | 12857500 | promoter-1          | promoter-1  | -722    | NM_01002  | 13205  | Ddx3x      | D1Pas1-rs2 |
| chr14 | 21493127 | 21493375 | promoter-1          | promoter-1  | -292    | NM_17259  | 218811 | Sec24c     | 2610204KC  |
| chr12 | 16702952 | 16703200 | exon (NM_           | exon (NM_   | 42800   | NM_00874  | 18217  | Ntsr2      | NT2R NTRI  |
| chr1  | 75165502 | 75165650 | intron (NM          | intron (NM  | 267     | NM_02684  | 68818  | Zfand2b    | 1110060O:  |
| chr13 | 59686952 | 59687125 | promoter-1          | promoter-1  | 344     | NM_03015  | 78689  | Naa35      | A330021G:  |
| chr11 | 51428752 | 51428850 | Intergenic          | Intergenic  | -4474   | NM_02663  | 52530  | Nhp2       | 2410130M   |
| chr6  | 1.49E+08 | 1.49E+08 | Intergenic          | Intergenic  | -48323  | NM_00128  | 67246  | 2810474O:  | 6720435I2: |
| chr1  | 93103927 | 93104375 | TTS (NM_0           | TTS (NM_0   | 27752   | NM_00116  | 51801  | Ramp1      | 9130218E1  |
| chr1  | 1.93E+08 | 1.93E+08 | Intergenic          | Intergenic  | -56915  | NM_17226  | 226856 | Lpgat1     | AI649174 , |
| chr11 | 70240227 | 70240325 | Intergenic          | Intergenic  | -5806   | NM_00127  | 216869 | Arrb2      | AI326910 , |
| chr9  | 65975277 | 65975425 | intron (NM          | intron (NM  | 933     | NM_02663  | 68250  | Fam96a     | 5730536AC  |
| chr19 | 5963677  | 5963800  | intron (NM          | intron (NM  | 468     | NM_00116  | 18969  | Pola2      | AI573378   |
| chr18 | 36675027 | 36675200 | intron (NM          | CpG         | 346     | NM_01041  | 15200  | Hbegf      | AW047313   |
| chr12 | 87376002 | 87376100 | intron (NML1MB8 LIN |             | 43940   | NM_00936  | 21809  | Tgfb3      | Tgfb-3     |
| chr1  | 1.22E+08 | 1.22E+08 | promoter-1          | promoter-1  | 349     | NM_00117  | 73103  | 3110009E1- |            |
| chr4  | 1.25E+08 | 1.25E+08 | promoter-1          | promoter-1  | 148     | NM_15356  | 230734 | Yrdc       | AV303379   |
| chr4  | 1.55E+08 | 1.55E+08 | promoter-1          | promoter-1  | 145     | NM_00103  | 433813 | Pusl1      | 281002111: |

|       |          |          |            |            |        |          |        |            |             |
|-------|----------|----------|------------|------------|--------|----------|--------|------------|-------------|
| chr4  | 58925527 | 58925700 | promoter-1 | promoter-1 | -16    | NM_17238 | 230249 | Al314180   | AW558785    |
| chr7  | 1.09E+08 | 1.09E+08 | TTS (NM_0  | TTS (NM_0  | -1482  | NM_01053 | 16068  | Il18bp     | IL-18BP Igi |
| chr13 | 37337727 | 37337875 | Intergenic | Intergenic | -99413 | NM_01074 | 17084  | Ly86       | MD-1 MD1    |
| chr19 | 45734727 | 45734850 | promoter-1 | promoter-1 | -105   | NM_01390 | 30838  | Fbxw4      | Dac Fbw4    |
| chr11 | 1.18E+08 | 1.18E+08 | Intergenic | Intergenic | -19118 | NM_00116 | 69926  | Dnah17     | 2810003K2   |
| chr2  | 1.27E+08 | 1.27E+08 | Intergenic | Intergenic | 25115  | NM_19863 | 329509 | 1810024BC- |             |
| chr7  | 75037702 | 75038325 | Intergenic | Intergenic | -59130 | NM_01051 | 16001  | Igf1r      | A330103N;   |
| chr9  | 43839452 | 43839525 | Intergenic | MER74A L   | -11979 | NM_00938 | 21838  | Thy1       | CD90 T25    |
| chr6  | 1.05E+08 | 1.05E+08 | Intergenic | RLTR11B L  | 479313 | NM_01738 | 53870  | Cntn6      | NB-3        |
| chr1  | 52186727 | 52186900 | intron (NM | intron (NM | 10347  | NM_00120 | 20846  | Stat1      | 2010005J0   |
| chr17 | 27270352 | 27270725 | intron (NM | intron (NM | 298    | NM_02606 | 67267  | Uqcc2      | 2900010M    |
| chr12 | 1.02E+08 | 1.02E+08 | promoter-1 | promoter-1 | -258   | NM_02668 | 68339  | Ccdc88c    | 0610010D2   |
| chr12 | 86611327 | 86611425 | intron (NM | CpG        | 138    | NM_17533 | 217716 | Mlh3       | AV125803    |
| chr8  | 77563852 | 77563950 | intron (NM | intron (NM | 6316   | NM_01162 | 21968  | Tom1       | -           |
| chr7  | 86805702 | 86805825 | exon (NM_  | exon (NM_  | 681    | NM_02983 | 77011  | Ticrr      | 5730590G1   |
| chr9  | 65635802 | 65636025 | intron (NM | intron (NM | 39458  | NM_17253 | 214812 | Zfp609     | 9830165N2   |
| chr15 | 99649177 | 99649275 | intron (NM | intron (NM | 1354   | NM_02306 | 65970  | Lima1      | Eplin       |
| chr1  | 45852277 | 45852925 | intron (NM | CpG        | 255    | NM_02859 | 73674  | Wdr75      | 1300003A1   |
| chr1  | 36328852 | 36328975 | intron (NM | intron (NM | 1357   | NM_15340 | 214854 | Neurl3     | 2010300PC   |
| chr1  | 1.37E+08 | 1.37E+08 | 5' UTR (NV | 5' UTR (NV | 171    | NM_00127 | 67196  | Ube2t      | 2700084L2   |
| chr1  | 65277102 | 65277300 | intron (NM | intron (NM | 43942  | NM_01108 | 18711  | Pikfyve    | 5230400C1   |
| chr10 | 1.21E+08 | 1.21E+08 | Intergenic | Intergenic | -12595 | NM_13895 | 192678 | Rassf3     | AW212023    |
| chr8  | 34784277 | 34784425 | intron (NM | intron (NM | 20641  | NM_01034 | 14782  | Gsr        | AI325518    |
| chr5  | 1.07E+08 | 1.07E+08 | Intergenic | Intergenic | 27133  | NM_00127 | 12545  | Cdc7       | AI597260    |
| chr8  | 41690302 | 41690550 | intron (NM | intron (NM | 29720  | NM_00104 | 54384  | Mtmr7      | -           |
| chr1  | 1.74E+08 | 1.74E+08 | intron (NM | intron (NM | -12635 | NM_00115 | 19298  | Pex19      | Pxf         |
| chr1  | 1.8E+08  | 1.8E+08  | intron (NM | CpG        | 1089   | NM_01680 | 51810  | Hnrnpu     | AA408410    |
| chr1  | 1.83E+08 | 1.83E+08 | promoter-1 | promoter-1 | -142   | NM_14551 | 226757 | Wdr26      | 1600024AC   |
| chr14 | 58618677 | 58618775 | promoter-1 | promoter-1 | -627   | NM_02864 | 68514  | Micu2      | 1110008L2   |
| chr10 | 1.21E+08 | 1.21E+08 | 3' UTR (NV | 3' UTR (NV | 47044  | NM_02905 | 74694  | Tbc1d30    | 4930505DC   |
| chr6  | 67482577 | 67482975 | Intergenic | Intergenic | 3040   | NM_02004 | 56753  | Tacstd2    | C80403 EC   |
| chr1  | 1.94E+08 | 1.94E+08 | promoter-1 | promoter-1 | -179   | NM_00129 | 214742 | Rcor3      | 4921514E2   |
| chr4  | 1.07E+08 | 1.07E+08 | Intergenic | Intergenic | -36121 | NM_01987 | 56296  | Dmrtb1     | Dmrt6 Prp   |
| chr12 | 1.02E+08 | 1.02E+08 | Intergenic | B1_Mur2 S  | -4475  | NM_15358 | 73086  | Rps6ka5    | 3110005L1   |
| chr1  | 16095927 | 16096000 | promoter-1 | promoter-1 | 0      | NM_13383 | 98711  | Rdh10      | 3110069KC   |
| chr1  | 1.73E+08 | 1.73E+08 | promoter-1 | promoter-1 | -550   | NM_00112 | 21945  | Dedd       | CASP8IP1    |
| chr10 | 12728302 | 12728450 | 5' UTR (NV | 5' UTR (NV | 120    | NM_17510 | 66125  | Sf3b5      | 10kDa 111   |
| chr8  | 1.17E+08 | 1.17E+08 | intron (NM | intron (NM | 392924 | NM_01957 | 80707  | Wwox       | 5330426PC   |
| chr2  | 24041652 | 24041850 | promoter-1 | promoter-1 | -245   | NM_15351 | 215257 | Il1f9      | Il36g       |
| chr1  | 72242752 | 72242975 | intron (NM | intron (NM | 16018  | NM_00100 | 381269 | Mreg       | Gm974 W     |
| chr1  | 52857102 | 52857550 | intron (NM | intron (NM | 17206  | NM_00838 | 16329  | Inpp1      | 2300002CC   |
| chr3  | 60211302 | 60211800 | Intergenic | Intergenic | -65201 | NM_00125 | 56758  | Mbnl1      | Mbnl mKI/   |
| chr10 | 80783802 | 80783900 | promoter-1 | promoter-1 | 3      | NM_02738 | 70312  | Cactin     | 2510012J0;  |
| chr2  | 1.8E+08  | 1.8E+08  | intron (NM | intron (NM | 12732  | NM_18316 | 228993 | Slc17a9    | 1700019HC   |
| chr5  | 1.07E+08 | 1.07E+08 | 5' UTR (NV | 5' UTR (NV | 111    | NM_02685 | 52397  | Zfp644     | 1110068L0   |
| chr5  | 28596227 | 28596450 | Intergenic | ORR1E LTF  | -31925 | NM_17565 | 269637 | Cnpy1      | 1500012D2   |
| chrX  | 1.37E+08 | 1.37E+08 | intron (NM | CpG        | 1073   | NM_00107 | 14605  | Tsc22d3    | DIP Dsip1   |

|       |          |          |             |            |         |          |        |            |            |
|-------|----------|----------|-------------|------------|---------|----------|--------|------------|------------|
| chr1  | 1.08E+08 | 1.08E+08 | intron (NM  | intron (NM | 29030   | NM_00112 | 227449 | Zcchc2     | 9930114B2  |
| chr7  | 26687752 | 26687875 | intron (NM  | intron (NM | 5136    | NM_00999 | 13088  | Cyp2b10    | Cyp2b Cyp  |
| chr14 | 31952777 | 31952950 | TTS (NM_0   | TTS (NM_0  | 4824    | NM_02728 | 70021  | Nt5dc2     | 2510015F0  |
| chr13 | 81922327 | 81922525 | intron (NM  | CpG        | 135     | NM_00768 | 12626  | Cetn3      | MmCEN3     |
| chr7  | 52281227 | 52281325 | Intergenic  | Intergenic | 7899    | NM_00910 | 20130  | Rras       | AI573426   |
| chr9  | 48288102 | 48288250 | intron (NM  | intron (NM | 540     | NM_02423 | 104444 | Rexo2      | 1810038D1  |
| chr5  | 1.01E+08 | 1.01E+08 | intron (NM  | intron (NM | 14528   | NM_17271 | 231510 | Agpat9     | 1-AGPAT 1  |
| chr5  | 66116202 | 66116275 | Intergenic  | ERVL-B4-in | -27143  | NM_00108 | 71521  | Pds5a      | 9030416H1  |
| chr17 | 53829452 | 53829575 | promoter-1  | promoter-1 | -873    | NM_02823 | 72415  | Sgol1      | 3300001M   |
| chr10 | 80396227 | 80396500 | Intergenic  | Intergenic | 3527    | NM_00865 | 17873  | Gadd45b    | AI323528 I |
| chr6  | 40421227 | 40421400 | promoter-1  | promoter-1 | -101    | NM_21246 | 381760 | Ssbp1      | 2810480P1  |
| chr7  | 46911452 | 46911625 | Intergenic  | Intergenic | 138402  | NM_00100 | 70227  | Zfp619     | 3000002G1  |
| chr19 | 10970002 | 10970200 | intron (NM  | CpG        | 380     | NM_00125 | 28000  | Prpf19     | AA617263   |
| chr1  | 99986927 | 99987150 | intron (NM  | intron (NM | 5171    | NM_01362 | 18484  | Pam        | PHM        |
| chr8  | 10006577 | 10006725 | promoter-1  | promoter-1 | 18      | NM_03362 | 24099  | Tnfsf13b   | BAFF BLyS  |
| chr8  | 1.24E+08 | 1.24E+08 | Intergenic  | Intergenic | -34833  | NM_02060 | 57340  | Jph3       | JP-3 Jp3   |
| chr5  | 1.41E+08 | 1.41E+08 | intron (NM  | MIRb SINE  | 263     | NM_02152 | 59031  | Chst12     | AI595374 I |
| chr19 | 4328927  | 4329000  | exon (NM_   | exon (NM_  | -22741  | NM_00129 | 110355 | Adrbk1     | Adrbk-1 Ba |
| chr14 | 70474952 | 70475100 | Intergenic  | CpG        | -2226   | NM_01878 | 13655  | Egr3       | Pilot      |
| chr3  | 60101577 | 60101800 | Intergenic  | RLTR13D3   | -175064 | NM_00125 | 56758  | Mbnl1      | Mbnl mKI/  |
| chr9  | 86962952 | 86963275 | intron (NM  | intron (NM | 46249   | NM_02419 | 266690 | Cyb5r4     | 2810034J1  |
| chr4  | 63747052 | 63747275 | Intergenic  | Intergenic | -39114  | NM_01160 | 21923  | Tnc        | AI528729 I |
| chr9  | 1.09E+08 | 1.09E+08 | exon (NM_   | exon (NM_  | 427     | NM_00892 | 19087  | Prkar2a    | 1110061A2  |
| chr11 | 23565352 | 23565725 | promoter-1  | promoter-1 | -136    | NM_02895 | 74467  | Pus10      | 2810013G1  |
| chrX  | 1.52E+08 | 1.52E+08 | Intergenic  | Intergenic | -29596  | NM_00108 | 73347  | 1700042B1- |            |
| chr17 | 36973452 | 36973750 | promoter-1  | promoter-1 | -490    | NM_00102 | 22670  | Trim26     | AI462198 ; |
| chr1  | 84299402 | 84299775 | Intergenic  | Intergenic | -18368  | NM_00100 | 98496  | Pid1       | 5033414KC  |
| chr13 | 55631152 | 55631300 | TTS (NM_1   | TTS (NM_1  | -1327   | NM_01373 | 27261  | Dok3       | AI450713 I |
| chr9  | 90010077 | 90010150 | promoter-1  | promoter-1 | -455    | NM_02443 | 21761  | Morf4l1    | MORFRG15   |
| chr8  | 27462052 | 27462450 | Intergenic  | Intergenic | 193610  | NM_19904 | 73754  | Thap1      | 4833431AC  |
| chr2  | 72877427 | 72877675 | Intergenic  | Intergenic | -59048  | NM_00101 | 20687  | Sp3        | D130027J0  |
| chr7  | 1.43E+08 | 1.43E+08 | exon (NM_   | exon (NM_  | 11974   | NM_00108 | 17345  | Mki67      | D630048A:  |
| chr5  | 1.11E+08 | 1.11E+08 | promoter-1  | promoter-1 | 493     | NM_02715 | 69663  | Ddx51      | 2310061OC  |
| chr7  | 1.24E+08 | 1.24E+08 | Intergenic  | Intergenic | -16495  | NM_00113 | 53322  | Nucb2      | AI607786 I |
| chr3  | 95695652 | 95695875 | promoter-1  | promoter-1 | 90      | NM_15351 | 229600 | BC028528   | L259       |
| chr6  | 8658502  | 8658700  | intron (NM  | intron (NM | 49857   | NM_00125 | 15893  | Ica1       | 69kDa ICA  |
| chr6  | 1.13E+08 | 1.13E+08 | intron (NM  | CpG        | 350     | NM_00124 | 67767  | Jagn1      | 5830427H1  |
| chr1  | 1.09E+08 | 1.09E+08 | promoter-1  | promoter-1 | -21     | NM_17741 | 12043  | Bcl2       | AW986256   |
| chr2  | 76448377 | 76448650 | Intergenic  | L1MB2 LIN  | 37538   | NM_01187 | 23992  | Prkra      | AV120107   |
| chr12 | 70732077 | 70732250 | intron (NM  | intron (NM | -48148  | NM_00103 | 207965 | Vcpkmt     | Gm71 Met   |
| chr4  | 1.17E+08 | 1.17E+08 | intron (NM  | ID_B1 SINi | 57819   | NM_02573 | 66743  | Rnf220     | 4732477A1  |
| chr17 | 56698852 | 56699100 | Intergenic  | Intergenic | 25030   | NM_00102 | 224902 | Safb2      | AA389433   |
| chr10 | 59806877 | 59807150 | intron (NR_ | (CA)n Simf | -2586   | NM_00115 | 74048  | 4632428NC  | Dies1 PD-1 |
| chr8  | 13027602 | 13027850 | intron (NM  | intron (NM | 1692    | NM_01017 | 14068  | F7         | AI132620 I |
| chr12 | 76394052 | 76394300 | Intergenic  | Intergenic | -15124  | NM_02327 | 80837  | Rhoj       | 1110005O:  |
| chr4  | 1.5E+08  | 1.5E+08  | promoter-1  | promoter-1 | 86      | NM_01106 | 18628  | Per3       | 2810049OC  |
| chr3  | 1.55E+08 | 1.55E+08 | promoter-1  | promoter-1 | 229     | NM_02933 | 75540  | Fpgt       | 1700016E0  |

|       |          |          |            |            |          |          |        |           |             |
|-------|----------|----------|------------|------------|----------|----------|--------|-----------|-------------|
| chr19 | 36422477 | 36422800 | Intergenic | Intergenic | -30919   | NM_02950 | 76073  | Pcgf5     | 0610009F0   |
| chr13 | 16285002 | 16285100 | Intergenic | Intergenic | 178743   | NM_00838 | 16323  | Inhba     | -           |
| chr11 | 58793277 | 58793500 | intron (NM | intron (NM | 1793     | NM_05316 | 94091  | Trim11    | -           |
| chr11 | 1.13E+08 | 1.13E+08 | Intergenic | Intergenic | -3872    | NM_02721 | 69806  | Slc39a11  | 1810074D2   |
| chr15 | 58046302 | 58046675 | promoter-1 | promoter-1 | -41      | NM_02634 | 67731  | Fbxo32    | 4833442G1   |
| chr16 | 90284152 | 90284300 | intron (NM | CpG        | 444      | NM_17892 | 224432 | Scaf4     | AA517739    |
| chr7  | 31597002 | 31597200 | Intergenic | Intergenic | 8895     | NM_00116 | 233079 | Ffar2     | GPCR43 G    |
| chr9  | 71388777 | 71388850 | intron (NM | RMER30 D   | 51354    | NM_00103 | 102371 | Myzap     | AA407270    |
| chr2  | 1.56E+08 | 1.56E+08 | 5' UTR (NM | 5' UTR (NM | 140      | NM_00129 | 170791 | Rbm39     | 1500012C1   |
| chr2  | 1.58E+08 | 1.58E+08 | exon (NM_  | exon (NM_  | 272      | NM_00848 | 16803  | Lbp       | Bpifd2 Ly8  |
| chr1  | 1.73E+08 | 1.73E+08 | Intergenic | L2a LINE L | 14381    | NM_14455 | 246256 | Fcgr4     | 4833442P2   |
| chr3  | 1.22E+08 | 1.22E+08 | intron (NM | MIR SINE   | 13378    | NM_01386 | 29815  | Bcar3     | AI131758 ,  |
| chr4  | 91038052 | 91038150 | intron (NM | CpG        | 645      | NM_01048 | 15569  | Elavl2    | Hub mel-N   |
| chr10 | 84379952 | 84380175 | promoter-1 | promoter-1 | -295     | NM_00101 | 237422 | Ric8b     | BC051080    |
| chr2  | 1.19E+08 | 1.19E+08 | promoter-1 | promoter-1 | -348     | NM_02657 | 68142  | Ino80     | 2310079N1   |
| chr2  | 26405377 | 26405800 | Intergenic | Intergenic | -30988   | NM_17844 | 353156 | Egfl7     | VE-statin Z |
| chr4  | 1.29E+08 | 1.29E+08 | promoter-1 | promoter-1 | -117     | NM_01689 | 11637  | Ak2       | Ak-2 D4Er1  |
| chr5  | 65252302 | 65252425 | Intergenic | Intergenic | 57601    | NM_00845 | 16599  | Klf3      | 9930027GC   |
| chr6  | 75830177 | 75830400 | Intergenic | L1Md_F2 L  | -1362423 | NM_02888 | 74342  | Lrrtm1    | 4632401DC   |
| chr12 | 35732702 | 35732775 | intron (NM | intron (NM | 877      | NM_00101 | 217463 | Snx13     | Rgs-px1 m   |
| chr7  | 65913552 | 65913775 | promoter-1 | promoter-1 | 91       | NM_00972 | 11982  | Atp10a    | Atp10c pfa  |
| chr18 | 43226202 | 43226500 | Intergenic | Intergenic | -7226    | NM_02839 | 72930  | Ppp2r2b   | 2900026HC   |
| chr12 | 74856727 | 74857050 | intron (NM | intron (NM | -151966  | NM_01043 | 15251  | Hif1a     | AA959795    |
| chr11 | 78932577 | 78932900 | intron (NM | intron (NM | 27118    | NM_01357 | 16706  | Ksr1      | AW492498    |
| chr3  | 35630927 | 35631075 | Intergenic | RCHARR1    | -22059   | NM_02957 | 76295  | Atp11b    | 1110019114  |
| chr3  | 36512302 | 36512400 | promoter-1 | promoter-1 | -40      | NM_02781 | 71492  | Bbs7      | 8430406N1   |
| chr6  | 4562552  | 4562675  | intron (NM | L1M5 LINE  | 11547    | NM_14539 | 213819 | Casd1     | Cas1 Cast1  |
| chr4  | 1.33E+08 | 1.33E+08 | promoter-1 | promoter-1 | -992     | NM_00128 | 20111  | Rps6ka1   | Mapkapk-1   |
| chr8  | 1.13E+08 | 1.13E+08 | promoter-1 | promoter-1 | 627      | NM_13397 | 102339 | Cog4      | AW554810    |
| chr12 | 16901127 | 16901250 | promoter-1 | promoter-1 | -596     | NM_00907 | 19878  | Rock2     | B230113H1   |
| chr1  | 1.73E+08 | 1.73E+08 | promoter-1 | promoter-1 | -558     | NM_15306 | 226646 | Ndufs2    | AL033311    |
| chr10 | 1.28E+08 | 1.28E+08 | promoter-1 | promoter-1 | -701     | NM_05407 | 116848 | Baz2a     | AA415431    |
| chrX  | 68474077 | 68474300 | intron (NM | MER5A DN   | 5931     | NM_01992 | 17772  | Mtm1      | AF073996    |
| chr19 | 3709202  | 3709375  | intron (NM | intron (NM | 955      | NM_02807 | 72056  | 1810055GC | AI256204    |
| chr15 | 66810827 | 66811075 | Intergenic | Intergenic | -9748    | NM_00868 | 17988  | Ndrp1     | CAP43 CM    |
| chr11 | 47113327 | 47113600 | intron (NM | MTE2b LTI  | 79341    | NM_01189 | 24052  | Sgcd      | 35kDa delt  |
| chr1  | 75209852 | 75210000 | intron (NM | intron (NM | 2522     | NM_01149 | 20872  | Stk16     | EDPK Krc1   |
| chr2  | 84222202 | 84222400 | intron (NM | intron (NM | 43122    | NM_01878 | 54598  | Calcr1    | AV071593    |
| chr2  | 1.81E+08 | 1.81E+08 | promoter-1 | promoter-1 | -11      | NM_00129 | 56470  | Rgs19     | 2610042F0   |
| chr1  | 80336177 | 80336375 | intron (NM | intron (NM | 729      | NM_01671 | 26554  | Cul3      | AI467304 ,  |
| chr10 | 1.17E+08 | 1.17E+08 | promoter-1 | promoter-1 | -990     | NM_13401 | 103468 | Nup107    | AW541137    |
| chr8  | 1.14E+08 | 1.14E+08 | intron (NM | CpG        | 210      | NM_00791 | 13680  | Ddx19a    | DBP5 Ddx1   |
| chr4  | 59582527 | 59582825 | Intergenic | L1M4 LINE  | -11759   | NM_00130 | 72479  | Hsd12     | 2610207110  |
| chr12 | 1.05E+08 | 1.05E+08 | 5' UTR (NM | 5' UTR (NM | 114      | NM_00115 | 27225  | Ddx24     | 1700055J0   |
| chr7  | 1.38E+08 | 1.38E+08 | Intergenic | URR1B DN   | -26211   | NM_13394 | 101476 | Plekha1   | AA960558    |
| chr15 | 75644802 | 75645075 | intron (NM | intron (NM | 27400    | NM_17212 | 223642 | Zc3h3     | BC049953    |
| chr2  | 1.7E+08  | 1.7E+08  | Intergenic | Intergenic | -15713   | NM_00115 | 228913 | Zfp217    | 4933431CC   |



|       |          |          |             |             |         |           |        |          |              |
|-------|----------|----------|-------------|-------------|---------|-----------|--------|----------|--------------|
| chr3  | 1.04E+08 | 1.04E+08 | Intergenic  | Intergenic  | 69791   | NM_00102  | 269473 | Lrig2    | 463241911    |
| chr14 | 62078127 | 62078275 | Intergenic  | Intergenic  | -19417  | NM_00846  | 16648  | Kpna3    | IPOA4        |
| chr7  | 29527427 | 29527525 | promoter-1  | promoter-1  | 489     | NM_02363  | 71984  | Sars2    | 2410015F0    |
| chr11 | 77305902 | 77306000 | promoter-1  | promoter-1  | -963    | NM_00100  | 216963 | Git1     | Cat-1 p95C   |
| chr5  | 53134827 | 53135025 | intron (NM  | intron (NM  | 2113    | NM_02595  | 67073  | Pi4k2b   | 2610042NC    |
| chr8  | 87189427 | 87189525 | Intergenic  | Intergenic  | -2725   | NM_01049  | 15936  | Ier2     | AI317238 I   |
| chr15 | 76173652 | 76173725 | promoter-1  | promoter-1  | -265    | NM_02556  | 66445  | Cyc1     | 2610002H1    |
| chr3  | 30894727 | 30894875 | 5' UTR (NM  | 5' UTR (NM  | 108     | NM_00885  | 18759  | Prkci    | 2310021H1    |
| chr5  | 34856252 | 34856575 | exon (NM_   | exon (NM_   | 215     | NM_13906  | 231130 | Tnip2    | 1810020H1    |
| chr1  | 22917777 | 22918000 | Intergenic  | Intergenic  | -105325 | NM_00101  | 116837 | Rims1    | C030033M     |
| chr5  | 1.08E+08 | 1.08E+08 | promoter-1  | promoter-1  | -156    | NM_00116  | 170823 | Glmn     | 9330160J1    |
| chr15 | 38583102 | 38583275 | Intergenic  | Intergenic  | -8471   | NM_02549  | 66335  | Atp6v1c1 | 1700025B1    |
| chr11 | 97310052 | 97310175 | Intergenic  | Intergenic  | -1361   | NM_02149  | 58996  | Arhgap23 | A330041B1    |
| chr9  | 1.07E+08 | 1.07E+08 | promoter-1  | promoter-1  | -481    | NM_00101  | 321006 | Vprbp    | AI447437 I   |
| chr2  | 1.21E+08 | 1.21E+08 | intron (NM  | intron (NM  | 105679  | NM_00129  | 241627 | Wdr76    | 5830411K1    |
| chr5  | 1.09E+08 | 1.09E+08 | promoter-1  | promoter-1  | -381    | NM_00108  | 433931 | Pigg     | Gpi7         |
| chr3  | 1.38E+08 | 1.38E+08 | intron (NR_ | intron (NR_ | 10941   | NM_01957  | 56224  | Tspan5   | 2810455AC    |
| chr11 | 1.19E+08 | 1.19E+08 | Intergenic  | CpG         | -17386  | NM_01392  | 30951  | Cbx8     | Pc3          |
| chr12 | 73637877 | 73637950 | intron (NM  | intron (NM  | 569     | NM_02632  | 67708  | Pcnxl4   | 1810048J1    |
| chr10 | 83996352 | 83996425 | exon (NM_   | exon (NM_   | 245     | NM_17545  | 216197 | Ckap4    | 5630400AC    |
| chr9  | 96799552 | 96799675 | Intergenic  | URR1B DN    | -9720   | NM_00128  | 235534 | Pxylp1   | 9430094M     |
| chr2  | 32816752 | 32818600 | promoter-1  | promoter-1  | 444     | NM_00907  | 269261 | Rpl12    | E430018F0    |
| chr7  | 56496802 | 56496950 | intron (NM  | intron (NM  | -4683   | NM_17527  | 78286  | Nav2     | 5330421F0    |
| chr11 | 48671602 | 48671800 | Intergenic  | Intergenic  | 13147   | NM_00832  | 15944  | Irgm1    | Ifggd3 Iifi1 |
| chr4  | 1.01E+08 | 1.01E+08 | promoter-1  | promoter-1  | -31     | NM_00117  | 11639  | Ak4      | AK 4 Ak-3    |
| chr10 | 82902002 | 82902100 | Intergenic  | RLTR10-int  | 79085   | NM_02657  | 28109  | D10Wsu10 | AI747614 I   |
| chr1  | 1.09E+08 | 1.09E+08 | Intergenic  | Intergenic  | -14487  | NM_00117  | 18788  | Serpinb2 | PAI-2 Plan   |
| chr13 | 51519852 | 51519925 | Intergenic  | Intergenic  | 15901   | NM_01010  | 13610  | S1pr3    | AI132464 I   |
| chr12 | 34809477 | 34809600 | intron (NM  | intron (NM  | 167002  | NM_01165  | 22160  | Twist1   | AA960487     |
| chr14 | 26610402 | 26610675 | Intergenic  | L1MC3 LIN   | -22196  | NM_00110  | 71918  | Zcchc24  | 2310047AC    |
| chr2  | 1.7E+08  | 1.7E+08  | Intergenic  | Intergenic  | -77938  | NM_00115  | 228913 | Zfp217   | 4933431CC    |
| chr17 | 44743402 | 44743575 | non-coding  | non-coding  | 129637  | NR_07342! | 12393  | Runx2    | AML3 Cbf     |
| chr1  | 82761627 | 82761725 | intron (NM  | intron (NM  | 3355    | NM_02545  | 66261  | Tm4sf20  | 1810018L0    |
| chr14 | 79841277 | 79842000 | Intergenic  | Intergenic  | -10004  | NM_00103  | 432879 | Zbtbd6   | EG432879     |
| chr11 | 97012152 | 97012225 | Intergenic  | CpG         | -1162   | NM_19810  | 73174  | Tbkbp1   | 3110043L1    |
| chr1  | 1.72E+08 | 1.72E+08 | intron (NM  | intron (NM  | 53712   | NM_02256  | 18214  | Ddr2     | AW495251     |
| chr3  | 9886727  | 9887050  | Intergenic  | MER20 DN    | -53209  | NM_00119  | 94212  | Pag1     | Cbp F7300    |
| chr1  | 1.84E+08 | 1.84E+08 | intron (NM  | intron (NM  | 2594    | NM_13381  | 98386  | Lbr      | AI505894 I   |
| chr15 | 10436027 | 10436225 | intron (NM  | intron (NM  | 20333   | NM_00128  | 19355  | Rad1     | mRAD1        |
| chr14 | 45621952 | 45622150 | 3' UTR (NV  | 3' UTR (NV  | 14265   | NM_00896  | 19217  | Ptger2   | EP2 Ptgere   |
| chr1  | 1.8E+08  | 1.8E+08  | promoter-1  | promoter-1  | -118    | NM_00116  | 269152 | Kif26b   | 4832420M     |
| chr19 | 10600002 | 10600250 | promoter-1  | promoter-1  | 392     | NM_17230  | 269061 | Cpsf7    | 573045311    |
| chr1  | 80633852 | 80633925 | intron (NM  | intron (NM  | 28039   | NM_00128  | 210293 | Dock10   | 9330153B1    |
| chr10 | 95096952 | 95097150 | Intergenic  | MLT1B LTF   | -70250  | NM_02772  | 71207  | Nudt4    | 4933436C1    |
| chr4  | 62390252 | 62390400 | Intergenic  | Intergenic  | 109620  | NM_13425  | 50780  | Rgs3     | 4930506NC    |
| chr6  | 4550752  | 4551175  | promoter-1  | promoter-1  | -103    | NM_14539  | 213819 | Casd1    | Cas1 Cast1   |
| chr16 | 13780827 | 13781100 | intron (NM  | CpG         | 171     | NM_00103  | 106298 | Rrn3     | AL023001     |

|       |          |          |            |            |         |          |        |          |            |
|-------|----------|----------|------------|------------|---------|----------|--------|----------|------------|
| chr11 | 61282877 | 61283125 | Intergenic | Intergenic | -15507  | NM_00129 | 22671  | Rnf112   | ZNF179 Zf  |
| chr10 | 29274177 | 29274350 | Intergenic | Intergenic | -18590  | NM_02835 | 72780  | Rspo3    | 2810459HC  |
| chr1  | 95375552 | 95375775 | promoter-1 | promoter-1 | 25      | NM_00115 | 18000  | 2-Sep    | AW208991   |
| chr14 | 98486752 | 98486925 | intron (NM | intron (NM | 82146   | NM_00103 | 13134  | Dach1    | Dac Dach   |
| chr1  | 79861677 | 79861950 | Intergenic | Intergenic | -6573   | NM_00925 | 20720  | Serpine2 | B230326M   |
| chr5  | 24191752 | 24192200 | intron (NM | G-rich Low | 343     | NM_01673 | 53312  | Nub1     | 4931404D2  |
| chr5  | 1.4E+08  | 1.4E+08  | promoter-1 | promoter-1 | 31      | NM_02674 | 68510  | Ints1    | 1110015KC  |
| chr7  | 5012352  | 5012600  | TTS (NM_1  | TTS (NM_1  | -1269   | NM_13367 | 22185  | U2af2    | 65kDa      |
| chr7  | 1.05E+08 | 1.05E+08 | promoter-1 | promoter-1 | -75     | NM_02422 | 68197  | Ndufc2   | 1810004I0  |
| chr8  | 1.26E+08 | 1.26E+08 | promoter-1 | promoter-1 | 912     | NM_02820 | 72325  | Vps9d1   | 130001811  |
| chr3  | 40491502 | 40491825 | intron (NM | intron (NM | -21130  | NM_17838 | 73333  | Slc25a31 | 1700034J0  |
| chr18 | 39720402 | 39720725 | Intergenic | Intergenic | -73664  | NM_00817 | 14815  | Nr3c1    | GR Grl-1 C |
| chr8  | 1.29E+08 | 1.29E+08 | Intergenic | Intergenic | 95720   | NM_02421 | 67952  | Tomm20   | 1810060KC  |
| chr17 | 31432827 | 31433050 | promoter-1 | promoter-1 | -231    | NM_00124 | 224674 | Slc37a1  | G3PP       |
| chr18 | 21159752 | 21159950 | promoter-1 | promoter-1 | 9       | NM_20762 | 56515  | Rnf138   | 2410015A1  |
| chr11 | 1.18E+08 | 1.18E+08 | Intergenic | Cheshire C | 33454   | NM_00770 | 12702  | Socs3    | Cis3 Cish3 |
| chr3  | 1.44E+08 | 1.44E+08 | Intergenic | Intergenic | 64733   | NM_00116 | 16911  | Lmo4     | A730077C1  |
| chr5  | 1.39E+08 | 1.39E+08 | promoter-1 | promoter-1 | -99     | NM_01696 | 50878  | Stag3    | SA-2       |
| chr5  | 92556827 | 92557000 | Intergenic | Intergenic | -10051  | NM_01949 | 56041  | Uso1     | 115kDa TA  |
| chr4  | 1.55E+08 | 1.55E+08 | promoter-1 | promoter-1 | 123     | NM_00766 | 12537  | Cdk11b   | AA989746   |
| chr12 | 78063377 | 78063600 | promoter-1 | promoter-1 | -253    | NM_00114 | 17187  | Max      | AA960152   |
| chr6  | 1.47E+08 | 1.47E+08 | intron (NM | CpG        | 171     | NM_14557 | 232536 | Mrps35   | MDSO23 M   |
| chr17 | 29797502 | 29798575 | intron (NM | intron (NM | 492     | NM_02879 | 74157  | Cmtr1    | 1300018I0  |
| chr3  | 97432002 | 97432275 | promoter-1 | promoter-1 | -589    | NM_00116 | 14263  | Fmo5     | 5033418D1  |
| chr19 | 25063677 | 25063850 | Intergenic | LTR89 LTR  | -10256  | NM_02878 | 76088  | Dock8    | 1200017A2  |
| chr8  | 1.2E+08  | 1.2E+08  | Intergenic | Intergenic | -13048  | NM_02872 | 74032  | Sdr42e1  | 4632417NC  |
| chr1  | 20880902 | 20881125 | promoter-1 | promoter-1 | 310     | NM_02882 | 74229  | Paqr8    | 1700019B1  |
| chr17 | 47432102 | 47432200 | intron (NM | intron (NM | 64972   | NM_17262 | 224829 | Trerf1   | 9430096I1  |
| chr1  | 1.73E+08 | 1.73E+08 | Intergenic | L1MC LINE  | -32671  | NM_01948 | 56009  | Alyref2  | C130042O:  |
| chr19 | 12514602 | 12514875 | Intergenic | Intergenic | 12343   | NM_01954 | 56093  | Pfpl     | Epcs5 Epcs |
| chr3  | 88100502 | 88100725 | promoter-1 | promoter-1 | 147     | NM_02980 | 76927  | Tsacc    | 1700021C1  |
| chr9  | 32309952 | 32310175 | intron (NM | intron (NM | 38974   | NM_00802 | 14247  | Fli1     | EWSR2 Fli- |
| chr18 | 46905227 | 46905625 | intron (NM | intron (NM | 3855    | NM_00968 | 11777  | Ap3s1    | [s]3A      |
| chr17 | 6270527  | 6270850  | intron (NM | CpG        | 218     | NM_00103 | 77106  | Tmem181a | 5930418K1  |
| chr11 | 78114402 | 78114500 | promoter-1 | promoter-1 | -642    | NM_01740 | 54141  | Spag5    | AI874642   |
| chr11 | 20012502 | 20012575 | intron (NM | CpG        | 416     | NM_14624 | 66713  | Actr2    | 4921510D2  |
| chr4  | 1.39E+08 | 1.39E+08 | Intergenic | Intergenic | -1263   | NM_00979 | 12345  | Capzb    | 1700120CC  |
| chr1  | 43557077 | 43557150 | intron (NM | intron (NM | 54517   | NM_01087 | 17974  | Nck2     | 4833426I1  |
| chr8  | 80069477 | 80069800 | Intergenic | BGLII_B LT | -3658   | NM_00108 | 102182 | Prmt10   | AI931714   |
| chr5  | 1.5E+08  | 1.5E+08  | intron (NM | intron (NM | 5735    | NM_15357 | 231912 | Katnal1  | -          |
| chr10 | 5075252  | 5075450  | Intergenic | Intergenic | -76483  | NM_00107 | 64009  | Syne1    | 8B A33004  |
| chr12 | 73765777 | 73766050 | promoter-1 | promoter-1 | -98     | NM_02552 | 66375  | Dhrs7    | 2310016E2  |
| chr5  | 1.26E+08 | 1.26E+08 | Intergenic | Intergenic | -3476   | NM_01963 | 22190  | Ubc      | 2700054OC  |
| chr4  | 1.25E+08 | 1.25E+08 | promoter-1 | promoter-1 | -290    | NM_02731 | 70088  | Meaf6    | 2310005NC  |
| chr14 | 62637727 | 62637950 | Intergenic | Intergenic | 273978  | NM_17341 | 239133 | Dleu7    | BC038059   |
| chr12 | 98395102 | 98395175 | Intergenic | Intergenic | 1102409 | NM_00807 | 14420  | Galc     | 2310068BC  |
| chr4  | 1.41E+08 | 1.41E+08 | intron (NM | intron (NM | 10083   | NM_00101 | 68817  | Ddi2     | 1110056G1  |

|       |          |          |            |            |         |          |        |           |             |
|-------|----------|----------|------------|------------|---------|----------|--------|-----------|-------------|
| chr5  | 1.18E+08 | 1.18E+08 | intron (NM | intron (NM | 512     | NM_02153 | 59043  | Wsb2      | AA673511    |
| chr3  | 95497977 | 95498200 | Intergenic | Intergenic | -6307   | NM_14489 | 229595 | Adamtsl4  | Tsrc1       |
| chr17 | 23813127 | 23813350 | TTS (NM_1  | TTS (NM_1  | 1178    | NM_00116 | 27279  | Tnfrsf12a | AI255180 I  |
| chr6  | 47903627 | 47903750 | non-coding | non-coding | 299     | NM_17889 | 101197 | Zfp956    | AI894139    |
| chr6  | 1.27E+08 | 1.27E+08 | promoter-1 | promoter-1 | -453    | NM_18140 | 101187 | Parp11    | 5330431N2   |
| chr14 | 55633702 | 55633875 | promoter-1 | promoter-1 | -503    | NM_02689 | 68966  | Ngdn      | 1500001L1   |
| chr1  | 13362752 | 13362850 | intron (NM | intron (NM | 1363    | NM_00107 | 17978  | Ncoa2     | 9530095N1   |
| chr5  | 1.08E+08 | 1.08E+08 | intron (NM | intron (NM | 25570   | NM_02606 | 67266  | Fam69a    | 2900024C2   |
| chr15 | 99163277 | 99163450 | intron (NM | intron (NM | 37523   | NM_01878 | 54614  | Prpf40b   | 2610317D2   |
| chr1  | 1.59E+08 | 1.59E+08 | intron (NM | intron (NM | 544     | NM_02314 | 30935  | Tor3a     | Adir        |
| chr5  | 89196077 | 89196225 | intron (NM | intron (NM | 2113    | NM_00783 | 13178  | Dck       | -           |
| chr11 | 79997477 | 79997550 | exon (NM_  | exon (NM_  | 139     | NM_02801 | 71956  | Rnf135    | 0610037NC   |
| chr5  | 1.44E+08 | 1.44E+08 | promoter-1 | promoter-1 | -73     | NM_14491 | 231871 | Daglb     | E3300361I9  |
| chr4  | 40089652 | 40089875 | promoter-1 | promoter-1 | -535    | NM_00738 | 11428  | Aco1      | Aco-1 Ireb  |
| chr18 | 15765602 | 15765675 | intron (NM | Lx8 LINE L | 110917  | NM_19905 | 71367  | Chst9     | 5430438DC   |
| chr3  | 1.46E+08 | 1.46E+08 | Intergenic | Intergenic | -47270  | NM_02914 | 75015  | 4930503B2 | 1700013AC   |
| chr6  | 90271202 | 90271350 | intron (NM | MTD LTR I  | 3903    | NM_02792 | 71797  | Chst13    | 1110067M    |
| chr13 | 76759877 | 76760100 | intron (NM | intron (NM | 237579  | NM_03017 | 78771  | Mctp1     | 2810465F1   |
| chr1  | 1.35E+08 | 1.35E+08 | Intergenic | Intergenic | 80306   | NM_00922 | 20643  | Snrpe     | AL022645    |
| chr17 | 57414802 | 57414925 | Intergenic | CpG        | -3660   | NM_00116 | 22324  | Vav1      | Vav vav-T   |
| chr15 | 3929127  | 3929300  | intron (NM | CpG        | 360     | NM_13409 | 106052 | Fbxo4     | 1700096C1   |
| chr1  | 1.34E+08 | 1.34E+08 | intron (NM | B3 SINE B  | 13451   | NM_17251 | 213006 | Mfsd4     | A230072BC   |
| chr1  | 58784002 | 58784125 | intron (NM | intron (NM | -3333   | NM_00129 | 12633  | Cflar     | 2310024N1   |
| chr12 | 59011077 | 59011275 | Intergenic | Intergenic | -301615 | NM_00921 | 20605  | Sstr1     | SRIF-2 SS-1 |
| chr10 | 87783727 | 87783875 | Intergenic | Intergenic | 36019   | NM_02787 | 71712  | Dram1     | 1200002N1   |
| chr19 | 23210177 | 23210250 | Intergenic | CpG        | -5503   | NM_01063 | 16601  | Klf9      | 2310051E1   |
| chr18 | 35113627 | 35113975 | intron (NM | CpG        | 204     | NM_01048 | 15526  | Hspa9     | 74kDa Csa   |
| chr2  | 1.44E+08 | 1.44E+08 | intron (NM | intron (NM | 3496    | NM_01977 | 56431  | Dstn      | 2610043P1   |
| chr4  | 11250527 | 11250750 | Intergenic | Intergenic | -1360   | NM_00108 | 381510 | Dpy19l4   | Gm1023 N    |
| chr11 | 1.11E+08 | 1.11E+08 | Intergenic | MIRc SINE  | 378810  | NM_00842 | 16518  | Kcnj2     | IRK1 Kcnf1  |
| chr1  | 1.35E+08 | 1.35E+08 | exon (NM_  | exon (NM_  | 2133    | NM_13381 | 108954 | Ppp1r15b  | 1810033K1   |
| chr1  | 1.73E+08 | 1.73E+08 | intron (NM | intron (NM | 15571   | NM_17264 | 16456  | F11r      | 9130004G2   |
| chr5  | 1.23E+08 | 1.23E+08 | promoter-1 | promoter-1 | -53     | NM_01102 | 18438  | P2rx4     | AI504491 ,  |
| chr16 | 77039627 | 77039925 | intron (NM | intron (NM | 25462   | NM_01391 | 30940  | Usp25     | -           |
| chr16 | 36656052 | 36656350 | intron (NM | intron (NM | 9962    | NM_01938 | 12524  | Cd86      | B7 B7-2 B   |
| chr16 | 37868527 | 37868650 | exon (NM_  | exon (NM_  | 102     | NM_17709 | 320184 | Lrrc58    | 1810012N1   |
| chr5  | 96589852 | 96590175 | intron (NM | CpG        | 553     | NM_00128 | 231464 | Cnot6l    | 4932442K2   |
| chr7  | 14682902 | 14683200 | intron (NM | Lx8 LINE L | 25291   | NM_00110 | 629203 | Sult2a3   | EG629203    |
| chr3  | 1.29E+08 | 1.29E+08 | intron (NM | intron (NM | 90472   | NM_13045 | 170439 | Elovl6    | C77826 FA   |
| chr13 | 44769052 | 44769150 | Intergenic | Intergenic | -57042  | NM_02187 | 16468  | Jarid2    | Jmj jumon   |
| chr13 | 3741377  | 3741625  | Intergenic | Intergenic | 62063   | NM_02741 | 70405  | Calml3    | 2310068O2   |
| chr2  | 1.2E+08  | 1.2E+08  | promoter-1 | promoter-1 | -178    | NM_00116 | 68925  | Rpap1     | 1190005L0   |
| chr3  | 87709827 | 87710825 | promoter-1 | promoter-1 | 83      | NM_00823 | 15191  | Hdgf      | AI118077 I  |
| chr9  | 56843277 | 56843500 | 5' UTR (NM | 5' UTR (NM | 613     | NM_01965 | 56294  | Ptpn9     | MEG2        |
| chr4  | 43071902 | 43072025 | promoter-1 | promoter-1 | 18      | NM_02146 | 22249  | Unc13b    | Munc13-1    |
| chr11 | 84729852 | 84730000 | promoter-1 | promoter-1 | -68     | NM_00100 | 448850 | Znhit3    | Myohd1 Ti   |
| chr14 | 68334452 | 68334750 | promoter-1 | promoter-1 | 446     | NM_00128 | 105440 | Kctd9     | -           |

|       |          |          |                       |         |          |        |          |            |
|-------|----------|----------|-----------------------|---------|----------|--------|----------|------------|
| chr11 | 94853127 | 94853275 | exon (NM_exon (NM_    | 675     | NM_17226 | 217124 | Ppp1r9b  | SPL Spn    |
| chr3  | 1.57E+08 | 1.57E+08 | promoter-1promoter-1  | 40      | NM_01738 | 53861  | Zranb2   | AI227013 ; |
| chr11 | 79067577 | 79067750 | intron (NM CpG        | 534     | NM_01965 | 78889  | Wsb1     | 1110056B1  |
| chr13 | 98883202 | 98883300 | intron (NM intron (NM | 92869   | NM_01202 | 110596 | Arhgef28 | 9230110L0  |
| chr11 | 1.2E+08  | 1.2E+08  | intron (NM CpG        | 313     | NM_00119 | 217365 | Nploc4   | AK129375   |
| chr10 | 53102627 | 53102725 | Intergenic Intergenic | -3019   | NM_00120 | 1E+08  | Cep85l   | ENSMUSGC   |
| chr2  | 11661277 | 11661450 | Intergenic Intergenic | 34024   | NM_00127 | 16169  | Il15ra   | AA690181   |
| chr9  | 21125777 | 21125875 | intron (NM intron (NM | 663     | NM_00119 | 68682  | Slc44a2  | 1110028E1  |
| chr5  | 53900827 | 53900900 | Intergenic Intergenic | -46155  | NM_00108 | 19664  | Rbpj     | AI843960   |
| chr2  | 1.04E+08 | 1.04E+08 | 5' UTR (NV 5' UTR (NV | 145     | NM_01043 | 15259  | Hipk3    | DYRK6 FIS  |
| chr1  | 1.83E+08 | 1.83E+08 | exon (NM_exon (NM_    | 202     | NM_13322 | 170760 | Acbd3    | 60kDa 843  |
| chr2  | 28438402 | 28438650 | 5' UTR (NV 5' UTR (NV | 273     | NM_14892 | 70239  | Gtf3c5   | 2700084AC  |
| chr6  | 44419152 | 44419850 | Intergenic (CA)n Simf | -590559 | NM_00100 | 66797  | Cntnap2  | 5430425M   |
| chr5  | 1.11E+08 | 1.11E+08 | promoter-1promoter-1  | 143     | NM_00814 | 269682 | Golga3   | 5330413L0  |
| chr1  | 93263427 | 93263550 | intron (NM intron (NM | 481     | NM_17339 | 227358 | Fam132b  | 4832406C2  |
| chr3  | 1.04E+08 | 1.04E+08 | Intergenic Intergenic | -5015   | NM_00130 | 15257  | Hipk1    | 1110062KC  |
| chr18 | 61371202 | 61371600 | promoter-1promoter-1  | -151    | NM_00788 | 13521  | Slc26a2  | Dtd ST-OB  |
| chr7  | 52961027 | 52961175 | exon (NM_exon (NM_    | 484     | NM_01697 | 13170  | Dbp      | -          |
| chr11 | 1.22E+08 | 1.22E+08 | intron (NM intron (NM | 4360    | NM_14479 | 210029 | Metrn1   | 9430048M   |
| chr3  | 1.08E+08 | 1.08E+08 | Intergenic Intergenic | -6496   | NM_00818 | 14867  | Gstm6    | -          |
| chr4  | 43043502 | 43044500 | intron (NM CpG-9863   | 255     | NM_02323 | 66592  | Stoml2   | 0610038F0  |
| chr8  | 13104852 | 13105050 | promoter-1promoter-1  | 392     | NM_17870 | 234069 | Pcid2    | A730042J0  |
| chr11 | 78250827 | 78250900 | Intergenic Intergenic | -15176  | NM_02241 | 20500  | Slc13a2  | Nadc1 mN   |
| chr10 | 1.12E+08 | 1.12E+08 | 5' UTR (NV 5' UTR (NV | 269     | NM_00103 | 382423 | Atxn7l3b | 4921506J0  |
| chr10 | 61912677 | 61912775 | promoter-1promoter-1  | -285    | NM_18142 | 338359 | Supv3l1  | 6330443E1  |
| chr1  | 74552602 | 74553100 | 5' UTR (NV 5' UTR (NV | 217     | NM_02138 | 58184  | Rqcd1    | 2610007F2  |
| chr2  | 1.57E+08 | 1.57E+08 | intron (NM CpG        | 284     | NM_01386 | 29812  | Ndr3     | 4833415O1  |
| chr8  | 97542677 | 97542925 | intron (NM intron (NM | 1209    | NM_17303 | 54672  | Gpr97    | A030001G2  |
| chr9  | 50287652 | 50287725 | Intergenic Intergenic | -14942  | NM_02963 | 76509  | Plet1    | 0610037B2  |
| chr11 | 80322052 | 80322200 | intron (NM intron (NM | 31578   | NM_00987 | 12569  | Cdk5r1   | Cdk5r D11  |
| chr3  | 1.07E+08 | 1.07E+08 | intron (NM intron (NM | 703     | NM_14554 | 229709 | Ahcyl1   | 1110034F2  |
| chr1  | 1.9E+08  | 1.9E+08  | intron (NM intron (NM | -56555  | NM_01193 | 26381  | Esrrg    | ERR3 Errg  |
| chr4  | 1.33E+08 | 1.33E+08 | Intergenic Intergenic | -23460  | NM_00116 | 230789 | Fam76a   | -          |
| chr6  | 1.48E+08 | 1.48E+08 | intron (NM intron (NM | 61863   | NM_17879 | 330450 | Far2     | A230046P1  |
| chr11 | 50229302 | 50229375 | intron (NM RSINE1 SIN | 15275   | NM_17255 | 216724 | Rufy1    | 3000002E0  |
| chr1  | 1.01E+08 | 1.01E+08 | Intergenic Intergenic | 305675  | NM_02758 | 70866  | Slco6d1  | 492151110' |
| chr14 | 28662852 | 28663025 | intron (NM intron (NM | 227310  | NM_17781 | 238988 | Erc2     | 6430531DC  |
| chr19 | 42055577 | 42055675 | promoter-1promoter-1  | 0       | NM_02815 | 72199  | Mms19    | 2410001K2  |
| chr10 | 8485827  | 8486075  | intron (NM intron (NM | 119917  | NM_17515 | 70097  | Sash1    | 1100001C1  |
| chr15 | 8405602  | 8405825  | Intergenic Intergenic | -11250  | NM_20123 | 71175  | Nipbl    | Idn3       |
| chr12 | 92654702 | 92655100 | intron (NML2 LINE L2  | 15468   | NM_01164 | 22095  | Tshr     | AI481368   |
| chr12 | 32782127 | 32782325 | Intergenic Intergenic | -36082  | NM_01115 | 19088  | Prkar2b  | AI451071 , |
| chr7  | 1.18E+08 | 1.18E+08 | Intergenic B1_Mur1 S  | -4627   | NM_00943 | 22083  | Ctr9     | AA409336   |
| chr1  | 71444652 | 71444875 | intron (NM intron (NM | 16721   | NM_17521 | 74591  | Abca12   | 4832428G1  |
| chr13 | 74134077 | 74134200 | Intergenic MIRm SINI  | -12729  | NM_18283 | 72948  | Tppp     | 2900041AC  |
| chr9  | 1.05E+08 | 1.05E+08 | 5' UTR (NV 5' UTR (NV | 575     | NM_17502 | 235574 | Atp2c1   | 1700121J1  |
| chr1  | 54894552 | 54894650 | intron (NM intron (NM | 88630   | NM_00108 | 329154 | Ankrd44  | 4930444A1  |

|       |          |          |                       |          |          |        |          |            |
|-------|----------|----------|-----------------------|----------|----------|--------|----------|------------|
| chr1  | 1.55E+08 | 1.55E+08 | promoter-1promoter-1  | -387     | NM_00100 | 226517 | Smg7     | 9430023P1  |
| chr6  | 1.25E+08 | 1.25E+08 | intron (NM intron (NM | 24095    | NM_01353 | 14791  | Emg1     | C2f Grcc2f |
| chr13 | 56218677 | 56218800 | intron (NMB4 SINE B.  | 18173    | NM_01201 | 26914  | H2afy    | H2AF12M    |
| chr4  | 6310552  | 6310725  | intron (NM intron (NM | 17811    | NM_00109 | 53378  | Sdcbp    | MDA-9 Syc  |
| chr5  | 1.36E+08 | 1.36E+08 | intron (NM intron (NM | 21792    | NM_00889 | 18984  | Por      | 4933424M   |
| chr7  | 75275077 | 75275275 | intron (NM intron (NM | 133943   | NM_03010 | 78444  | Pgpep1l  | C330024D1  |
| chr12 | 74154877 | 74155150 | Intergenic CpG        | -7314    | NM_00918 | 20471  | Six1     | BB138287   |
| chr16 | 84884877 | 84885150 | Intergenic L1MB2 LIN  | -49194   | NM_01675 | 11957  | Atp5j    | -          |
| chr15 | 58818102 | 58818250 | intron (NM intron (NM | 52811    | NM_02317 | 66218  | Ndufb9   | 1190008J1. |
| chr17 | 75546702 | 75546825 | intron (NM intron (NM | -31387   | NM_20695 | 268977 | Ltbp1    | 9430031G1  |
| chr11 | 13390377 | 13390525 | Intergenic Intergenic | -1025488 | NM_00128 | 12808  | Cobl     | -          |
| chr11 | 3066077  | 3066150  | intron (NMB1_Mur4 S   | 27353    | NM_03020 | 78887  | Sfi1     | -          |
| chr2  | 31615827 | 31615900 | 5' UTR (NM 5' UTR (NM | 170      | NM_00128 | 11350  | Abl1     | AI325092 , |
| chr8  | 58564427 | 58564600 | intron (NM intron (NM | 144891   | NM_08043 | 110304 | Gira3    | -          |
| chr17 | 34056752 | 34056975 | TTS (NM_0 TTS (NM_0   | 440      | NM_00931 | 21356  | Tapbp    | D17Wsu91   |
| chr9  | 44346052 | 44346300 | Intergenic Intergenic | -11672   | NM_00755 | 12145  | Cxcr5    | Blr1 CXC-R |
| chr17 | 70961602 | 70961725 | intron (NM intron (NM | 50576    | NM_00112 | 224997 | Dlgap1   | 4933422O1  |
| chr2  | 34964652 | 34964850 | promoter-1promoter-1  | -261     | NM_01201 | 26920  | Cntrl    | 6720467O0  |
| chr11 | 1.11E+08 | 1.11E+08 | Intergenic Intergenic | 30473    | NM_00842 | 16518  | Kcnj2    | IRK1 Kcnf1 |
| chr13 | 55462502 | 55462800 | intron (NM intron (NM | 1493     | NM_02582 | 66890  | Lman2    | 1110003HC  |
| chr1  | 39506677 | 39507300 | intron (NM intron (NM | 28604    | NM_01877 | 54610  | Tbc1d8   | AD3 HBLP:  |
| chr9  | 44729152 | 44729300 | promoter-1promoter-1  | -401     | NM_01379 | 27425  | Atp5l    | 4933437CC  |
| chr2  | 21625352 | 21625675 | intron (NM intron (NM | 336319   | NM_00100 | 241263 | Gpr158   | 5330427M   |
| chr1  | 1.58E+08 | 1.58E+08 | Intergenic Intergenic | -17204   | NM_00923 | 20652  | Soat1    | 8430426K1  |
| chr1  | 1.83E+08 | 1.83E+08 | promoter-1promoter-1  | -105     | NM_00110 | 72568  | Lin9     | 2700022J2. |
| chr1  | 78334952 | 78335175 | intron (NML3b LINE C  | 28142    | NM_00100 | 433323 | Sgpp2    | SPPase2 Sj |
| chr19 | 46852877 | 46852975 | intron (NML1MB2 LIN   | 16827    | NM_00110 | 94219  | Cnm2     | AU015877   |
| chr7  | 4634852  | 4634975  | intron (NMA-rich Low  | 1652     | NM_02417 | 66245  | Hspbp1   | 1500019G2  |
| chr17 | 56428677 | 56428900 | intron (NMID_B1 SINI  | 1146     | NM_02583 | 66905  | Plin3    | 1300012C1  |
| chr3  | 10246952 | 10247500 | intron (NM intron (NM | -38650   | NM_02440 | 11770  | Fabp4    | 422/aP2 A  |
| chr13 | 74527927 | 74528050 | Intergenic Intergenic | -13974   | NM_00108 | 238722 | Zfp72    | Zfp74      |
| chr13 | 39052402 | 39052750 | promoter-1promoter-1  | 168      | NM_00117 | 108652 | Slc35b3  | 4921526O0  |
| chr3  | 93247452 | 93247900 | exon (NM_ exon (NM_   | 1424     | NM_00116 | 99681  | Tchh     | AHF AI597  |
| chr1  | 1.36E+08 | 1.36E+08 | 5' UTR (NM 5' UTR (NM | 107      | NM_02832 | 72674  | Adipor1  | 2810031L1  |
| chr4  | 1.41E+08 | 1.41E+08 | intron (NM intron (NM | 16378    | NM_17786 | 329972 | Spata21  | 4933414GC  |
| chr19 | 46150027 | 46150125 | promoter-1promoter-1  | -261     | NM_00103 | 70769  | Nolc1    | NOPP130    |
| chr1  | 1.97E+08 | 1.97E+08 | Intergenic CpG        | -65004   | NM_00775 | 12902  | Cr2      | C3DR CD2:  |
| chr18 | 78012727 | 78013025 | intron (NMCpG         | 369      | NM_00750 | 11946  | Atp5a1   | AI035633 , |
| chr3  | 54611377 | 54611650 | exon (NM_ exon (NM_   | 200      | NM_13323 | 170767 | Rfxap    | 5730495K2  |
| chr2  | 1.35E+08 | 1.35E+08 | Intergenic RLTR11B L  | -47081   | NM_02914 | 52837  | Tmx4     | 2810417DC  |
| chr9  | 61220827 | 61220900 | 5' UTR (NM 5' UTR (NM | 690      | NM_00108 | 21887  | Tle3     | 2610103NC  |
| chr17 | 71339952 | 71340200 | promoter-1promoter-1  | -220     | NM_02340 | 67938  | Myl12b   | 1500001M   |
| chr2  | 24285502 | 24285575 | intron (NM intron (NM | 44621    | NM_17761 | 215632 | Psd4     | BC046518   |
| chr6  | 38270652 | 38270850 | intron (NMLRTR45 LT   | -21492   | NM_17246 | 209032 | Zc3hav1l | B130055L0  |
| chr14 | 76154027 | 76154150 | exon (NM_ exon (NM_   | 212      | NM_17738 | 338337 | Cog3     | E430004N2  |
| chr2  | 1.47E+08 | 1.47E+08 | intron (NMCpG         | 330      | NM_01191 | 24128  | Xrn2     | -          |
| chr4  | 16029802 | 16030300 | Intergenic Intergenic | 60594    | NM_13895 | 192656 | Ripk2    | 2210420D1  |

|       |          |          |                  |            |         |          |        |          |            |
|-------|----------|----------|------------------|------------|---------|----------|--------|----------|------------|
| chr7  | 1.05E+08 | 1.05E+08 | Intergenic       | Intergenic | -19531  | NM_17510 | 66333  | Aqp11    | 1700015P1  |
| chr15 | 63489552 | 63489850 | Intergenic       | Intergenic | 150593  | NM_03137 | 83492  | Gsdmc    | Gsdmc1 M   |
| chr1  | 72475052 | 72475650 | exon (NM_        | exon (NM_  | 107787  | NM_00104 | 381270 | 4-Mar    | BC056494   |
| chr15 | 36723077 | 36723150 | intron (NM       | CpG        | 1180    | NM_01174 | 22631  | Ywhaz    | 111001311: |
| chr11 | 60637152 | 60637475 | Intergenic       | ID_B1 SIN  | -6820   | NM_00117 | 216820 | Dhrs7b   | BC003479   |
| chr12 | 88784077 | 88784800 | promoter-1       | promoter-1 | 351     | NM_00110 | 211064 | Alkbh1   | 2700073G1  |
| chr3  | 88754802 | 88755425 | promoter-1       | promoter-1 | -909    | NM_00116 | 65111  | Dap3     | 4921514D1  |
| chr1  | 1.59E+08 | 1.59E+08 | Intergenic       | Intergenic | -47044  | NM_02388 | 78255  | Ralgps2  | 1810020P1  |
| chr12 | 77505377 | 77505800 | exon (NM_        | exon (NM_  | 231     | NM_00830 | 15512  | Hspa2    | 70kDa HSF  |
| chr15 | 78411977 | 78412550 | Intergenic       | Intergenic | -9050   | NM_00900 | 19354  | Rac2     | AI323801 , |
| chr2  | 1.52E+08 | 1.52E+08 | intron (NM       | intron (NM | 543     | NM_02419 | 67231  | Tbc1d20  | 111002810: |
| chr2  | 26881127 | 26881275 | intron (NML2     | LINE L2    | 2317    | NM_17265 | 227659 | Slc2a6   | A330096C2  |
| chr2  | 1.12E+08 | 1.12E+08 | Intergenic       | Intergenic | -6972   | NM_20720 | 99010  | Lpcat4   | AI505034 , |
| chr16 | 4077527  | 4077875  | exon (NM_        | exon (NM_  | 109     | NM_02650 | 68015  | Trap1    | 2410002K2  |
| chr6  | 54987827 | 54988225 | promoter-1       | promoter-1 | 31      | NM_18067 | 353172 | Gars     | GENA202 f  |
| chr14 | 73798202 | 73798500 | Intergenic       | Intergenic | -13273  | NM_00841 | 16432  | Itm2b    | AI256040 f |
| chr9  | 65393902 | 65394000 | Intergenic       | Intergenic | 33943   | NM_15311 | 102595 | Plekho2  | AI840980 f |
| chr4  | 1.2E+08  | 1.2E+08  | intron (NM       | CpG        | 430     | NM_01674 | 51797  | Ctps     | Ctps1      |
| chr2  | 1.65E+08 | 1.65E+08 | intron (NM       | CpG        | 133     | NM_14612 | 228866 | Pcif1    | 2310022K1  |
| chr13 | 9882202  | 9882400  | intron (NM       | intron (NM | -117741 | NM_14451 | 66505  | Zmynd11  | 2210402G2  |
| chrX  | 33561502 | 33561625 | intron (NMPB1D10 | SI         | -90571  | NM_13399 | 16164  | Il13ra1  | AI882074 f |
| chr17 | 34764652 | 34764925 | promoter-1       | promoter-1 | -746    | NM_01944 | 54397  | Ppt2     | 0610007M   |
| chr11 | 53584127 | 53584300 | intron (NM       | intron (NM | 238     | NM_00115 | 16362  | Irf1     | AU020929   |
| chr15 | 59480152 | 59480300 | promoter-1       | promoter-1 | 17      | NM_14454 | 211770 | Trib1    | A5300900:  |
| chr6  | 52141902 | 52142250 | promoter-1       | promoter-1 | -374    | NM_00826 | 15401  | Hoxa4    | AV206827   |
| chr2  | 35585427 | 35585500 | 3' UTR (NM       | 3' UTR (NM | 33211   | NM_00129 | 69601  | Dab2ip   | 2310011DC  |
| chr2  | 1.51E+08 | 1.51E+08 | intron (NM       | intron (NM | -14222  | NM_00129 | 241727 | Snph     | 6430515AC  |
| chr1  | 1.3E+08  | 1.3E+08  | Intergenic       | Intergenic | 30763   | NM_00991 | 12767  | Cxcr4    | CD184 Cm   |
| chr5  | 1.22E+08 | 1.22E+08 | promoter-1       | promoter-1 | -82     | NM_01120 | 19247  | Ptpn11   | 2700084A1  |
| chr7  | 1.21E+08 | 1.21E+08 | intron (NM       | intron (NM | 1040    | NM_02737 | 67420  | Far1     | 2600011M   |
| chr16 | 33381352 | 33381550 | promoter-1       | promoter-1 | 590     | NM_01174 | 22661  | Zfp148   | 2210405JO: |
| chr6  | 1.25E+08 | 1.25E+08 | intron (NM       | intron (NM | 8651    | NM_17555 | 269800 | Zfp384   | BB163993   |
| chr18 | 70782152 | 70782375 | exon (NM_        | exon (NM_  | 54317   | NM_01077 | 17191  | Mbd2     | MBD2a      |
| chr2  | 1.64E+08 | 1.64E+08 | intron (NM       | CpG-8831   | 617     | NM_02557 | 66460  | Sys1     | 2610042O1  |
| chr3  | 1.29E+08 | 1.29E+08 | intron (NM       | intron (NM | 80059   | NM_13045 | 170439 | Elovl6   | C77826 FA  |
| chr6  | 83081827 | 83081925 | Intergenic       | MER63B D   | -3926   | NM_00113 | 20166  | Rtkn     | -          |
| chr10 | 1.27E+08 | 1.27E+08 | intron (NM       | intron (NM | 17366   | NM_00851 | 16971  | Lrp1     | A2mr AI31  |
| chr3  | 1.08E+08 | 1.08E+08 | promoter-1       | promoter-1 | -204    | NM_02619 | 67495  | Tmem167k | 2010200O1  |
| chr5  | 1.22E+08 | 1.22E+08 | exon (NM_        | exon (NM_  | 53736   | NM_00116 | 231712 | Trafd1   | 1110008KC  |
| chr17 | 16448252 | 16448350 | Intergenic       | Intergenic | -484751 | NM_17861 | 68799  | Rgmb     | 1110059F1  |
| chr1  | 52289102 | 52289250 | intron (NM       | CpG        | 900     | NM_00108 | 14660  | Gls      | 6330442B1  |
| chr16 | 49800852 | 49800950 | Intergenic       | Intergenic | -54866  | NM_01058 | 16423  | Cd47     | 9130415E2  |
| chr1  | 1.93E+08 | 1.93E+08 | intron (NM       | CpG        | 724     | NM_00749 | 11910  | Atf3     | LRG-21     |
| chr17 | 28575727 | 28575925 | intron (NM       | intron (NM | 47268   | NM_01022 | 14229  | Fkbp5    | D17ErtD59: |
| chr11 | 69808927 | 69809100 | promoter-1       | promoter-1 | -255    | NM_00129 | 78246  | Phf23    | 1-Jun      |
| chr8  | 64493002 | 64493275 | intron (NM       | intron (NM | 86254   | NM_00129 | 234311 | Ddx60    | 9830118M   |
| chr5  | 1.24E+08 | 1.24E+08 | Intergenic       | Intergenic | -4200   | NM_17509 | 23912  | Rhof     | AI845056 , |

|       |          |          |            |            |         |          |        |            |            |
|-------|----------|----------|------------|------------|---------|----------|--------|------------|------------|
| chr17 | 24856577 | 24857900 | promoter-1 | promoter-1 | 230     | NM_00850 | 16898  | Rps2       | Llrep3 S4  |
| chr1  | 1.84E+08 | 1.84E+08 | Intergenic | Intergenic | -18394  | NM_13381 | 98386  | Lbr        | AI505894 j |
| chr18 | 32664602 | 32664750 | Intergenic | Intergenic | 55012   | NM_00104 | 71683  | Gypc       | 0610037F2  |
| chr11 | 1.02E+08 | 1.02E+08 | promoter-1 | promoter-1 | -66     | NM_00115 | 237943 | Gpatch8    | 5430405G2  |
| chr4  | 63005277 | 63005700 | promoter-1 | promoter-1 | -112    | NM_00876 | 18405  | Orm1       | Agp-1 Agp  |
| chr15 | 57847002 | 57847275 | Intergenic | Intergenic | 18711   | NM_02941 | 75758  | 9130401M   | AI849328   |
| chr6  | 71583077 | 71583900 | promoter-1 | promoter-1 | -577    | NM_00103 | 104263 | Kdm3a      | 1700105C2  |
| chr17 | 26005127 | 26005225 | intron (NM | intron (NM | 507     | NM_02663 | 68241  | Fam195a    | 9530058BC  |
| chr1  | 1.56E+08 | 1.56E+08 | TTS (NR_1C | TTS (NR_1C | 1004    | NM_00813 | 14645  | Glul       | GS Glns    |
| chr8  | 1.23E+08 | 1.23E+08 | intron (NM | intron (NM | 7884    | NM_00116 | 234797 | 6430548M   | AW049007   |
| chr12 | 21422452 | 21422550 | intron (NM | intron (NM | 796     | NM_01173 | 22630  | Ywhaq      | 2700028PC  |
| chr10 | 1.05E+08 | 1.05E+08 | promoter-1 | promoter-1 | 48      | NM_20752 | 216292 | Mettl25    | -          |
| chr3  | 1E+08    | 1E+08    | promoter-1 | promoter-1 | -630    | NM_01076 | 17156  | Man1a2     | AI428775 , |
| chr7  | 86433327 | 86433425 | intron (NM | intron (NM | 15224   | NM_01881 | 54608  | Abhd2      | 2210009N1  |
| chr14 | 1.04E+08 | 1.04E+08 | Intergenic | Intergenic | -62520  | NM_02288 | 64929  | Scel       | 9230114IO: |
| chr13 | 47509252 | 47509450 | Intergenic | Intergenic | 219979  | NM_00117 | 218215 | Rnf144b    | BC025007   |
| chr2  | 1.66E+08 | 1.66E+08 | intron (NM | intron (NM | 39059   | NM_00125 | 72043  | Sulf2      | 2010004N2  |
| chr17 | 4995377  | 4995525  | exon (NM_  | exon (NM_  | 377     | NM_00108 | 239985 | Arid1b     | 8030481M   |
| chr15 | 95625727 | 95625900 | intron (NM | intron (NM | 4539    | NM_00125 | 105722 | Ano6       | 2900059G1  |
| chr9  | 68882352 | 68882525 | intron (NM | intron (NM | -255210 | NM_00128 | 19883  | Rora       | 9530021D1  |
| chr13 | 1.09E+08 | 1.09E+08 | intron (NM | CpG        | 165     | NM_02900 | 74559  | Elovl7     | 9130013K2  |
| chr3  | 90035552 | 90035650 | promoter-1 | promoter-1 | 82      | NM_20692 | 23922  | Jtb        | Gm622      |
| chr7  | 1.08E+08 | 1.08E+08 | intron (NM | intron (NM | 7939    | NM_17707 | 320100 | Relt       | E430021K2  |
| chr8  | 1.09E+08 | 1.09E+08 | intron (NM | intron (NM | 36301   | NM_00922 | 20650  | Sntb2      | Snt2       |
| chr17 | 29250877 | 29250950 | Intergenic | Intergenic | 20196   | NM_00766 | 12575  | Cdkn1a     | CAP20 CDI  |
| chr19 | 16854577 | 16854675 | intron (NM | intron (NM | 797     | NM_17302 | 271564 | Vps13a     | 4930425F1  |
| chr1  | 9535527  | 9535725  | exon (NM_  | exon (NM_  | 137     | NM_02151 | 59014  | Rrs1       | 5730466AC  |
| chr4  | 1.5E+08  | 1.5E+08  | Intergenic | Intergenic | -4321   | NM_02056 | 57320  | Park7      | DJ-1 Dj1   |
| chr1  | 26348577 | 26348800 | Intergenic | Intergenic | 395617  | NM_00103 | 210940 | 4931408C2- |            |
| chr2  | 26593277 | 26593525 | Intergenic | Intergenic | -66599  | NM_01069 | 16821  | Lcn4       | A630045M   |
| chr3  | 1.09E+08 | 1.09E+08 | intron (NM | intron (NM | -95649  | NM_14613 | 57257  | Vav3       | A530094IO  |
| chr11 | 4136702  | 4136900  | promoter-1 | promoter-1 | 13      | NM_00101 | 18413  | Osm        | OncoM      |
| chr9  | 21397777 | 21398250 | promoter-1 | promoter-1 | -738    | NM_00120 | 74766  | Yipf2      | 1300010KC  |
| chr17 | 47469602 | 47469700 | intron (NM | intron (NM | -36185  | NM_00114 | 64657  | Mrps10     | 1110038B1  |
| chr14 | 73725852 | 73726000 | promoter-1 | promoter-1 | -328    | NM_00902 | 19645  | Rb1        | Rb Rb-1 p  |
| chrX  | 1.39E+08 | 1.39E+08 | exon (NM_  | exon (NM_  | 1194    | NM_00119 | 209497 | Tmem164    | AI316850 , |
| chr4  | 1.08E+08 | 1.08E+08 | intron (NM | CpG        | 294     | NM_00103 | 414872 | Zyg11b     | 1110046IO: |
| chr10 | 9716127  | 9716325  | Intergenic | Intergenic | -95388  | NM_00108 | 78808  | Stxbp5     | 0710001E2  |
| chr5  | 23606777 | 23606925 | intron (NM | CpG        | 443     | NM_02644 | 52323  | Klhl7      | 2700038BC  |
| chr15 | 98513602 | 98513775 | Intergenic | Intergenic | -5796   | NM_17261 | 223881 | Rnd1       | A830014L0  |
| chr8  | 30147602 | 30147750 | intron (NM | MIRm SINI  | 182432  | NM_15313 | 210801 | Unc5d      | D930029E1  |
| chr3  | 89153927 | 89154050 | promoter-1 | promoter-1 | -56     | NM_00961 | 11490  | Adam15     | MDC15 m    |
| chr11 | 98725052 | 98725275 | 5' UTR (NV | 5' UTR (NV | 251     | NM_19794 | 68524  | Wipf2      | 1110014JO: |
| chr1  | 1.58E+08 | 1.58E+08 | intron (NM | intron (NM | 9834    | NM_00116 | 208263 | Tor1aip1   | LAP1 Lap1  |
| chr11 | 98543702 | 98544150 | promoter-1 | promoter-1 | 58      | NM_00943 | 22123  | Psmd3      | AI255837 , |
| chr11 | 5906352  | 5906500  | intron (NM | RLTR4_MM   | 50665   | NM_01966 | 56418  | Ykt6       | 061004211! |
| chr3  | 83689127 | 83689625 | Intergenic | MIRb SINE  | -43846  | NM_01190 | 24088  | Tlr2       | Ly105      |

|       |          |          |                      |         |          |        |           |             |
|-------|----------|----------|----------------------|---------|----------|--------|-----------|-------------|
| chr3  | 89216177 | 89216275 | promoter-1promoter-1 | -441    | NM_17704 | 319945 | Flad1     | A930017E2   |
| chr12 | 1.01E+08 | 1.01E+08 | intron (NM           | 100108  | NM_18318 | 71375  | Foxn3     | 5430426H2   |
| chr12 | 29435202 | 29435275 | promoter-1promoter-1 | 21      | NM_00116 | 217449 | Trappc12  | CGI-87 D9:  |
| chr10 | 79794452 | 79794675 | intron (NM           | 1673    | NM_13929 | 70335  | Reep6     | 0610011M    |
| chr5  | 64465677 | 64465850 | Intergenic           | -18426  | NM_02570 | 66681  | Pgm1      | 3230402E0   |
| chr17 | 24614702 | 24614875 | intron (NM           | 1235    | NM_00125 | 56716  | Mlst8     | 0610033N1   |
| chr15 | 91113177 | 91113250 | intron (NM           | -90975  | NM_01199 | 26874  | Abcd2     | ABC39 ALI   |
| chr4  | 1.52E+08 | 1.52E+08 | intron (NM           | 1138    | NM_00125 | 16498  | Kcnab2    | F5 I2rf5 Ki |
| chr3  | 21852352 | 21852425 | Intergenic           | -123186 | NM_03073 | 81004  | Tbl1xr1   | 8030499HC   |
| chrX  | 7418977  | 7419075  | promoter-1promoter-1 | 69      | NM_13860 | 54644  | Otud5     | AA407879    |
| chr1  | 1.27E+08 | 1.27E+08 | intron (NM           | 15578   | NM_02373 | 74117  | Actr3     | 1200003AC   |
| chr2  | 52802852 | 52802950 | intron (NM           | 85999   | NM_17240 | 71409  | Fmnl2     | 5430425KC   |
| chr13 | 97907852 | 97908175 | promoter-1promoter-1 | 121     | NM_00127 | 320806 | Gfm2      | 6530419G1   |
| chr16 | 32555827 | 32556000 | Intergenic           | -53069  | NM_01163 | 22042  | Tfrc      | 2610028K1   |
| chr16 | 24859752 | 24859950 | intron (NM           | 137910  | NM_00114 | 210126 | Lpp       | 9430020K1   |
| chr14 | 48124002 | 48124225 | intron (NM           | 31877   | NM_00114 | 78938  | Fbxo34    | 2900057BC   |
| chr5  | 73259477 | 73259600 | intron (NM           | 149     | NM_00111 | 21682  | Tec       | -           |
| chr5  | 1.45E+08 | 1.45E+08 | intron (NM           | 8971    | NM_00108 | 231876 | Lmtk2     | 2900041G1   |
| chr9  | 43839077 | 43839425 | Intergenic           | -12216  | NM_00938 | 21838  | Thy1      | CD90 T25    |
| chr2  | 1.37E+08 | 1.37E+08 | intron (NM           | 1955    | NM_01382 | 16449  | Jag1      | ABE2 Gsfa   |
| chr9  | 64129577 | 64129650 | intron (NM           | 199     | NM_02537 | 66131  | Tipin     | 1110005AC   |
| chr13 | 37511102 | 37511225 | TTS (NM_0            | 73949   | NM_01074 | 17084  | Ly86      | MD-1 MD:    |
| chr19 | 7062152  | 7062225  | promoter-1promoter-1 | -47     | NM_01169 | 22340  | Vegfb     | VEGF-B Vr   |
| chr12 | 70782127 | 70782250 | intron (NM           | 651     | NM_00113 | 20663  | Sos2      | SOS-2 mSC   |
| chr2  | 1.65E+08 | 1.65E+08 | promoter-1promoter-1 | 74      | NM_19902 | 329559 | Zfp335    | 1810045J0   |
| chr17 | 73765777 | 73765975 | Intergenic           | -17240  | NM_00103 | 381122 | Capn13    | CANP 13 G   |
| chr10 | 13023877 | 13023950 | intron (NM           | 20053   | NM_00119 | 215789 | Phactr2   | AV158170    |
| chr7  | 71083127 | 71083350 | exon (NM_            | 563     | NM_02136 | 50794  | Klf13     | 0610043C1   |
| chr5  | 75148152 | 75148325 | Intergenic           | -49310  | NM_00115 | 16924  | Lnx1      | Lnx         |
| chr7  | 38804352 | 38804500 | 5' UTR (NV           | 145     | NM_01127 | 19777  | Uri1      | C80913 NM   |
| chr9  | 50401177 | 50401300 | Intergenic           | 10716   | NM_02584 | 66925  | Sdhd      | 3110001M    |
| chr10 | 36693702 | 36694200 | promoter-1promoter-1 | -399    | NM_00822 | 15182  | Hdac2     | D10Wsu17    |
| chr13 | 32926427 | 32926850 | Intergenic           | 16416   | NM_02542 | 66222  | Serp1b1a  | 1190005M    |
| chr5  | 76208777 | 76208850 | Intergenic           | 165640  | NM_01061 | 16542  | Kdr       | 6130401CC   |
| chr15 | 63833077 | 63833350 | intron (NM           | 58797   | NM_14484 | 223601 | Fam49b    | 0910001AC   |
| chr10 | 3283152  | 3283350  | Intergenic           | -40105  | NM_00103 | 320495 | Ipcef1    | A130090KC   |
| chr5  | 67785277 | 67785475 | 3' UTR (NV           | 33662   | NM_00116 | 666938 | Bend4     | D330027G:   |
| chr1  | 39544477 | 39544650 | Intergenic           | -8971   | NM_01877 | 54610  | Tbc1d8    | AD3 HBLP:   |
| chr11 | 60034077 | 60034150 | promoter-1promoter-1 | -7      | NM_01148 | 20787  | Srebf1    | ADD-1 ADI   |
| chr1  | 83073802 | 83073875 | Intergenic           | -38815  | NM_03055 | 80721  | Slc19a3   | A230084E2   |
| chr16 | 16568002 | 16568175 | Intergenic           | -7799   | NM_13923 | 224014 | Fgd4      | 9030023J0   |
| chr18 | 66164877 | 66165075 | Intergenic           | -2687   | NM_00117 | 70361  | Lman1     | 2610020P1   |
| chr6  | 1.23E+08 | 1.23E+08 | Intergenic           | 17674   | NM_00964 | 11628  | Aicda     | Aid Arp2    |
| chr14 | 61063077 | 61063325 | Intergenic           | 66078   | NM_00116 | 72125  | Amer2     | 2600011E0   |
| chr17 | 79102427 | 79102625 | intron (NM           | 33374   | NM_01150 | 268980 | Strn      | AU022939    |
| chr4  | 1.19E+08 | 1.19E+08 | intron (NM           | 115     | NM_00111 | 66101  | Ppih      | 1100001J0:  |
| chr13 | 49311552 | 49311725 | promoter-1promoter-1 | -243    | NM_02673 | 68480  | 1110007CC | AI851695    |



|       |          |          |            |            |        |           |        |          |            |
|-------|----------|----------|------------|------------|--------|-----------|--------|----------|------------|
| chr11 | 22764702 | 22765100 | Intergenic | Intergenic | -4565  | NM_00116  | 53625  | B3gnt2   | AA408337   |
| chr2  | 1.21E+08 | 1.21E+08 | intron (NM | intron (NM | 1378   | NM_17528  | 96957  | Tmem62   | B830009D2  |
| chr8  | 81818352 | 81818450 | promoter-1 | promoter-1 | 454    | NM_13382  | 109136 | Mmaa     | 2810018E0  |
| chr6  | 1.19E+08 | 1.19E+08 | intron (NM | intron (NM | 24538  | NM_19798  | 68465  | Adipor2  | 1110001114 |
| chr12 | 52945902 | 52946075 | Intergenic | Intergenic | -15465 | NM_14478  | 207304 | Hectd1   | A630086PC  |
| chr1  | 66747552 | 66747725 | intron (NM | CpG        | 171    | NM_02568  | 66646  | Rpe      | 2810429BC  |
| chr10 | 1.28E+08 | 1.28E+08 | promoter-1 | promoter-1 | 523    | NM_01886  | 67945  | Rpl41    | 1810055P1  |
| chr1  | 33814352 | 33814525 | exon (NM_  | exon (NM_  | 157    | NM_14539  | 213539 | Bag2     | 2610042A1  |
| chr5  | 1.37E+08 | 1.37E+08 | Intergenic | B1_Mus1 !  | -61103 | NM_00129  | 13047  | Cux1     | CDP Cutl1  |
| chr11 | 50190477 | 50190725 | promoter-1 | promoter-1 | -620   | NM_02151  | 59013  | Hnrnph1  | AI642080   |
| chr6  | 1.23E+08 | 1.23E+08 | Intergenic | CpG        | -18626 | NM_02189  | 60611  | Foxj2    | Fhx        |
| chr16 | 32165627 | 32165725 | promoter-1 | promoter-1 | -114   | NM_14606  | 224109 | Nrros    | E430025L0  |
| chr1  | 1.2E+08  | 1.2E+08  | promoter-1 | promoter-1 | -42    | NM_01165  | 22099  | Tsn      | 2610034C2  |
| chr1  | 95715977 | 95716050 | 3' UTR (NM | 3' UTR (NM | -5804  | NM_17888  | 98314  | D2hgdh   | AA408776   |
| chr5  | 44466627 | 44467000 | intron (NM | intron (NM | 19194  | NM_00116  | 19126  | Prom1    | 4932416E1  |
| chr9  | 75162052 | 75162125 | exon (NM_  | exon (NM_  | 213    | NM_13871  | 14697  | Gnb5     | GBS Gbeta  |
| chr1  | 1.22E+08 | 1.22E+08 | intron (NM | intron (NM | 676    | NM_00111  | 226352 | Epb4.1i5 | 1700030C1  |
| chr7  | 1.35E+08 | 1.35E+08 | intron (NM | CpG        | 448    | NM_14620  | 233893 | Zfp764   | 8030466O1  |
| chr16 | 30873002 | 30873075 | Intergenic | (CAGGA)n   | 208480 | NM_19862  | 268880 | Xxylt1   | AI480653   |
| chr10 | 12589027 | 12589100 | Intergenic | CpG        | -7530  | NM_01168  | 22288  | Utrn     | AA589569   |
| chr6  | 1.34E+08 | 1.34E+08 | intron (NM | intron (NM | 18254  | NM_02577  | 66813  | Bcl2l14  | 4930452K2  |
| chr2  | 1.02E+08 | 1.02E+08 | 5' UTR (NV | 5' UTR (NV | 119    | NM_02026  | 80985  | Trim44   | Dipb Mc7   |
| chr2  | 1.8E+08  | 1.8E+08  | Intergenic | L1MA9 LIN  | -15157 | NM_14893  | 108115 | Slco4a1  | OATP-E Slc |
| chr10 | 1.17E+08 | 1.17E+08 | Intergenic | Intergenic | -9102  | NM_01359  | 17110  | Lyz1     | Lyz Lzp-s  |
| chr1  | 72544052 | 72544475 | intron (NM | L1M5 LINE  | 38875  | NM_00104  | 381270 | 4-Mar    | BC056494   |
| chr15 | 57878152 | 57878600 | TTS (NM_0  | TTS (NM_0  | -12527 | NM_02941  | 75758  | 9130401M | AI849328   |
| chr11 | 21271302 | 21271650 | promoter-1 | promoter-1 | -206   | NM_00129  | 216558 | Ugp2     | UDPGP UC   |
| chr3  | 19126002 | 19126175 | 3' UTR (NV | 3' UTR (NV | 37867  | NR_04557! | 67472  | Mtfr1    | 1300002CC  |
| chr1  | 88375677 | 88376000 | Intergenic | Intergenic | -47473 | NM_00897  | 19231  | Ptma     | Thym       |
| chr1  | 36766102 | 36766175 | intron (NM | intron (NM | 632    | NM_14610  | 226977 | Actr1b   | 2310066K2  |
| chr3  | 9957952  | 9958275  | Intergenic | Intergenic | -54472 | NM_00127  | 16592  | Fabp5    | E-FABP Fal |
| chr7  | 1.4E+08  | 1.4E+08  | Intergenic | Intergenic | -98863 | NM_02993  | 77590  | Chst15   | 4631426J0. |
| chr7  | 19894827 | 19894900 | 5' UTR (NV | 5' UTR (NV | 531    | NM_00803  | 14282  | Fosb     | -          |
| chr17 | 6079877  | 6079975  | promoter-1 | promoter-1 | 98     | NM_18139  | 66467  | Gtf2h5   | 2700017PC  |
| chr10 | 79578027 | 79578125 | Intergenic | Intergenic | -1205  | NM_01149  | 20869  | Stk11    | AA408040   |
| chr3  | 79394802 | 79394875 | promoter-1 | promoter-1 | -473   | NM_02635  | 67738  | Ppid     | 4930564J0. |
| chr5  | 77738302 | 77738475 | exon (NM_  | exon (NM_  | 723    | NM_01983  | 56412  | Noa1     | 2610024G1  |
| chr1  | 94831327 | 94831525 | non-coding | non-coding | 441    | NM_01179  | 23830  | Capn10   | AW049679   |
| chr17 | 74715852 | 74716125 | promoter-1 | promoter-1 | -215   | NM_00114  | 66310  | Dpy30    | 2810410M   |
| chr11 | 1.21E+08 | 1.21E+08 | promoter-1 | promoter-1 | 40     | NM_00117  | 209318 | Gps1     | Cops1 Csn  |
| chr3  | 94386452 | 94386675 | promoter-1 | promoter-1 | 75     | NM_00108  | 76742  | Snx27    | 5730552M   |
| chr19 | 37000552 | 37000725 | promoter-1 | promoter-1 | 69     | NM_00108  | 107182 | Btaf1    | AI414500 , |
| chr17 | 25929427 | 25929700 | promoter-1 | promoter-1 | -224   | NM_14541  | 214917 | Fam173a  | -          |
| chr7  | 1.17E+08 | 1.17E+08 | promoter-1 | promoter-1 | -540   | NM_00928  | 20841  | Zfp143   | AA959806   |
| chr2  | 1.56E+08 | 1.56E+08 | intron (NM | intron (NM | -54096 | NM_02758  | 70873  | Cnbd2    | 4921517L1  |
| chr6  | 1.21E+08 | 1.21E+08 | intron (NM | intron (NM | 487    | NM_00754  | 12122  | Bid      | 2700049M   |
| chr4  | 1.35E+08 | 1.35E+08 | Intergenic | Intergenic | -2840  | NM_02638  | 52830  | Pnrc2    | 0610011E1  |

|       |          |          |             |            |         |          |        |            |             |
|-------|----------|----------|-------------|------------|---------|----------|--------|------------|-------------|
| chr5  | 77583802 | 77584000 | Intergenic  | Intergenic | -39753  | NM_17560 | 74318  | Hopx       | 1110018K1   |
| chrX  | 97821227 | 97821350 | promoter-1  | promoter-1 | -42     | NM_02830 | 72621  | Pdzd11     | 1810012H2   |
| chr7  | 1.34E+08 | 1.34E+08 | promoter-1  | promoter-1 | -344    | NM_01136 | 20399  | Sh2b1      | AI425885 I  |
| chr1  | 1.35E+08 | 1.35E+08 | Intergenic  | Intergenic | -41631  | NM_01073 | 16980  | Lrrn2      | 5730406J0   |
| chr17 | 8070052  | 8070175  | Intergenic  | Intergenic | -48752  | NM_14596 | 72536  | Tagap      | 2610315E1   |
| chr11 | 51419477 | 51419675 | intron (NM  | CpG        | 807     | NM_00104 | 15384  | Hnrnpab    | 3010025C1   |
| chr19 | 38129477 | 38129550 | promoter-1  | promoter-1 | -2      | NM_02829 | 74107  | Cep55      | 1200008O1   |
| chr11 | 1.01E+08 | 1.01E+08 | exon (NM_   | exon (NM_  | 1381    | NM_00772 | 12777  | Ccr10      | Cmkbr9 Gf   |
| chr8  | 1.08E+08 | 1.08E+08 | promoter-1  | promoter-1 | 240     | NM_01582 | 50788  | Fbxl8      | FBL8        |
| chr4  | 1.07E+08 | 1.07E+08 | intron (NM  | intron (NM | 558     | NM_02550 | 56280  | Mrp137     | 2300004O1   |
| chr1  | 1.27E+08 | 1.27E+08 | Intergenic  | Intergenic | 90453   | NM_02373 | 74117  | Actr3      | 1200003AC   |
| chr1  | 90175627 | 90176000 | Intergenic  | Intergenic | -1659   | NM_19865 | 381280 | Hjurp      | 6430706D2   |
| chr1  | 26340802 | 26341050 | Intergenic  | Intergenic | 403379  | NM_00103 | 210940 | 4931408C2- |             |
| chr6  | 29559452 | 29559775 | promoter-1  | promoter-1 | -6      | NM_17729 | 320938 | Tnpo3      | 5730544L1   |
| chr14 | 1.05E+08 | 1.05E+08 | intron (NM  | CpG        | 257     | NM_02604 | 72486  | Rnf219     | 2610206B1   |
| chr9  | 32334577 | 32334850 | intron (NM  | intron (NM | 14324   | NM_00802 | 14247  | Fli1       | EWSR2 Fli   |
| chr4  | 88183402 | 88183600 | Intergenic  | Intergenic | -14803  | NM_01051 | 15977  | Ifnb1      | IFN-beta If |
| chr19 | 45870827 | 45871025 | intron (NM  | intron (NM | -13145  | NM_02379 | 76055  | Mgea5      | 2810009A2   |
| chr12 | 76836852 | 76837050 | promoter-1  | promoter-1 | -235    | NM_03075 | 81535  | Sgpp1      | AI463453 !  |
| chr10 | 39797477 | 39797675 | intron (NM  | intron (NM | -52502  | NM_14482 | 215929 | AI317395   | AI482555 !  |
| chr19 | 43722977 | 43723100 | Intergenic  | Intergenic | 26333   | NM_14515 | 246696 | Slc25a28   | 2210403D1   |
| chr12 | 16539227 | 16539625 | Intergenic  | Intergenic | 57150   | NM_01576 | 14245  | Lpin1      | 4631420PC   |
| chr13 | 45350802 | 45351000 | Intergenic  | Intergenic | -134210 | NM_15378 | 218203 | Mylip      | 9430057C2   |
| chr1  | 88294927 | 88295050 | Intergenic  | Intergenic | -10272  | NM_01034 | 14767  | Nmur1      | FM-3 Gpr6   |
| chr18 | 67696277 | 67696525 | intron (NM  | intron (NM | 12426   | NM_17683 | 68166  | Spire1     | 6030430B1   |
| chr2  | 1.51E+08 | 1.51E+08 | promoter-1  | promoter-1 | -334    | NM_00801 | 14225  | Fkbp1a     | 12kDa FKB   |
| chr6  | 32117727 | 32118000 | intron (NM  | MER91C D   | 117575  | NM_02958 | 76382  | 1700012AC  | AI429084    |
| chr9  | 65738177 | 65738350 | exon (NM_   | exon (NM_  | 133     | NM_02651 | 68026  | 2810417H1  | AA409629    |
| chr1  | 36971227 | 36971525 | intron (NM  | intron (NM | 24996   | NM_01887 | 56030  | Tmem131    | 2610524E0   |
| chr13 | 1.01E+08 | 1.01E+08 | Intergenic  | (CAT)n Sir | 143662  | NM_01373 | 27220  | Cartpt     | Cart        |
| chr12 | 81215302 | 81215600 | Intergenic  | CpG        | -1451   | NM_00756 | 12192  | Zfp36l1    | AW742437    |
| chr11 | 1.16E+08 | 1.16E+08 | promoter-1  | promoter-1 | 4       | NM_17880 | 338364 | Trim65     | 4732463G1   |
| chr15 | 81529002 | 81529250 | Intergenic  | Intergenic | -1409   | NM_00116 | 214685 | Chadl      | AY100452    |
| chr14 | 47407502 | 47407950 | intron (NM  | CpG        | 306     | NM_00991 | 12793  | Cnih1      | 0610007J1.  |
| chr3  | 90313327 | 90313450 | promoter-1  | promoter-1 | 32      | NM_00129 | 66511  | Chtop      | 2500003M    |
| chr8  | 4276077  | 4276200  | promoter-1  | promoter-1 | -233    | NM_01159 | 21856  | Timm44     | 0710005E2   |
| chr8  | 34966177 | 34966575 | intron (NML | L1MB4 LIN  | 73959   | NM_01973 | 19663  | Rbpms      | 2010300K2   |
| chr6  | 1.49E+08 | 1.49E+08 | Intergenic  | Intergenic | -2722   | NM_00125 | 320204 | Mettl20    | 4833442J1!  |
| chr3  | 60275827 | 60276200 | promoter-1  | promoter-1 | -739    | NM_00125 | 56758  | Mbnl1      | Mbnl mKI/   |
| chr2  | 30061752 | 30061950 | promoter-1  | promoter-1 | -632    | NM_17240 | 70266  | Ccbl1      | 2010009KC   |
| chr4  | 56814877 | 56815250 | promoter-1  | promoter-1 | -138    | NM_00108 | 230234 | Fam206a    | -           |
| chr7  | 16633177 | 16633400 | Intergenic  | CpG        | -24003  | NM_00109 | 666528 | Zfp541     | EG666528    |
| chr1  | 87397627 | 87397950 | Intergenic  | Intergenic | 97597   | NM_03019 | 109032 | Sp110      | 5031415CC   |
| chr7  | 28141827 | 28141975 | promoter-1  | promoter-1 | -874    | NM_13867 | 192192 | Shkbp1     | B930062H1   |
| chr9  | 67692877 | 67693050 | intron (NM  | intron (NM | 4760    | NM_17718 | 320528 | Vps13c     | AI525242 ,  |
| chr2  | 38336852 | 38337025 | Intergenic  | Intergenic | -30279  | NM_02160 | 59126  | Nek6       | 1300007CC   |
| chr1  | 64244852 | 64245150 | Intergenic  | Intergenic | -77038  | NM_03356 | 93691  | Klf7       | 9830124PC   |

|       |          |          |            |            |        |          |        |          |            |
|-------|----------|----------|------------|------------|--------|----------|--------|----------|------------|
| chr1  | 30640852 | 30641000 | Intergenic | Intergenic | 279175 | NM_00108 | 213109 | Phf3     | 2310061N1  |
| chr8  | 68982427 | 68982550 | intron (NM | intron (NM | 27918  | NM_02546 | 66282  | Tma16    | 1810029B1  |
| chr5  | 23167052 | 23167275 | Intergenic | Intergenic | -44774 | NM_00927 | 20817  | Srpk2    | AW226533   |
| chr13 | 53024727 | 53025025 | exon (NM_  | exon (NM_  | 170    | NM_01670 | 11992  | Auh      | C77140 W   |
| chr1  | 34858127 | 34858400 | promoter-1 | promoter-1 | -304   | NM_18301 | 226970 | Arhgef4  | 9330140K1  |
| chr3  | 98143277 | 98143400 | intron (NM | CpG        | 554    | NM_01696 | 236539 | Phgdh    | 3-PGDH 3F  |
| chr4  | 34554102 | 34554225 | intron (NM | intron (NM | 8028   | NM_00115 | 50793  | Orc3     | Orc3l      |
| chr18 | 3382902  | 3382975  | promoter-1 | promoter-1 | -285   | NM_02940 | 71745  | Cul2     | 1300003D1  |
| chr9  | 54996577 | 54996650 | promoter-1 | promoter-1 | -563   | NM_18060 | 109161 | Ube2q2   | 3010021M   |
| chr3  | 1.06E+08 | 1.06E+08 | intron (NM | intron (NM | -3215  | NM_00128 | 67171  | Dram2    | 2010305N1  |
| chr5  | 1.26E+08 | 1.26E+08 | Intergenic | Intergenic | -15001 | NM_01963 | 22190  | Ubc      | 27000540C  |
| chr19 | 32463152 | 32463225 | promoter-1 | promoter-1 | -244   | NM_14479 | 208449 | Sgms1    | 953005801  |
| chr13 | 43391002 | 43391250 | intron (NM | intron (NM | 8415   | NM_00103 | 328232 | Gfod1    | 963003201  |
| chr2  | 1.81E+08 | 1.81E+08 | promoter-1 | promoter-1 | 8      | NM_00116 | 76688  | Arfrp1   | 150000610: |
| chr2  | 32390827 | 32390975 | promoter-1 | promoter-1 | 22     | NM_15356 | 98952  | Fam102a  | AI426465 f |
| chr3  | 96548352 | 96548500 | intron (NM | intron (NM | 16892  | NM_02640 | 67845  | Rnf115   | 2610028E0  |
| chr6  | 35494327 | 35494550 | Intergenic | MLT1-int   | -4550  | NM_00809 | 14489  | Mtpn     | 5033418D1  |
| chr12 | 1.1E+08  | 1.1E+08  | intron (NM | intron (NM | 3560   | NM_18132 | 214663 | Slc25a29 | C030003J1  |
| chr10 | 1.19E+08 | 1.19E+08 | intron (NM | CpG        | 698    | NM_02799 | 71902  | Cand1    | 23100380C  |
| chr5  | 21069802 | 21070000 | intron (NM | intron (NM | 20556  | NM_02897 | 74511  | Lrrc17   | 37kDa 483  |
| chr13 | 1.11E+08 | 1.11E+08 | intron (NM | (CA)n Simf | 60276  | NM_02385 | 67295  | Rab3c    | 270006210: |
| chr15 | 80542227 | 80542425 | intron (NM | CpG        | 583    | NM_14481 | 213988 | Tnrc6b   | 2700090M   |
| chr9  | 44067427 | 44067550 | intron (NM | intron (NM | -7941  | NM_13322 | 170761 | Pdzd3    | NaPi-Cap2  |
| chr6  | 72352027 | 72352200 | Intergenic | B3A SINE   | -11452 | NM_01679 | 22320  | Vamp8    | AU041171   |
| chr8  | 67355952 | 67356175 | intron (NM | intron (NM | 17759  | NM_17863 | 77113  | Klhl2    | 6030411N2  |
| chr17 | 81085452 | 81085750 | intron (NM | L1M4 LINE  | 41764  | NM_00129 | 225028 | Map4k3   | 4833416M   |
| chr1  | 1.94E+08 | 1.94E+08 | promoter-1 | promoter-1 | 48     | NM_17226 | 226856 | Lpgat1   | AI649174 , |
| chr8  | 32969677 | 32970025 | intron (NM | intron (NM | 58824  | NM_17859 | 211323 | Nrg1     | 6030402G2  |
| chr6  | 91629002 | 91629225 | Intergenic | Intergenic | -4948  | NM_00932 | 21366  | Slc6a6   | AA589629   |
| chr8  | 96535852 | 96536275 | intron (NM | CpG        | 477    | NM_01178 | 23802  | Amfr     | gp78       |
| chr5  | 1.44E+08 | 1.44E+08 | intron (NM | intron (NM | 673    | NM_00900 | 19353  | Rac1     | AL023026   |
| chr9  | 22171002 | 22171400 | intron (NM | intron (NM | 22449  | NM_02839 | 68743  | Anln     | 1110037A1  |
| chr2  | 1.13E+08 | 1.13E+08 | intron (NM | intron (NM | -29009 | NM_00128 | 14260  | Fmn1     | Fmn ld     |
| chr3  | 95084677 | 95084800 | intron (NM | intron (NM | 1260   | NM_17334 | 229589 | Prune    | 92301120C  |
| chr5  | 1.51E+08 | 1.51E+08 | promoter-1 | promoter-1 | -20    | NM_00976 | 12190  | Brca2    | Fancd1 RA  |
| chr9  | 7836902  | 7836975  | Intergenic | CpG        | -1683  | NM_00746 | 11797  | Birc2    | AW146227   |
| chr19 | 6277027  | 6277150  | exon (NM_  | exon (NM_  | 192    | NM_01011 | 13660  | Ehd1     | AA409636   |
| chr5  | 1.46E+08 | 1.46E+08 | promoter-1 | promoter-1 | 81     | NM_00129 | 54188  | Cpsf4    | 30kDa C79  |
| chr1  | 57464027 | 57464125 | promoter-1 | promoter-1 | -558   | NM_00103 | 68736  | Tyw5     | 1110034BC  |
| chr3  | 97817002 | 97817175 | promoter-1 | promoter-1 | -373   | NM_01092 | 18129  | Notch2   | AI853703   |
| chr16 | 45616227 | 45616400 | intron (NM | intron (NM | 5760   | NM_00115 | 14525  | Gcsam    | Gcet Gcet2 |
| chr14 | 32475027 | 32475175 | intron (NM | CpG        | 20858  | NM_02529 | 26363  | Btd      | -          |
| chr1  | 1.33E+08 | 1.33E+08 | intron (NM | CpG        | 575    | NM_00108 | 14270  | Srgap2   | 9930124L2  |
| chr1  | 44176127 | 44176250 | promoter-1 | promoter-1 | -570   | NM_02364 | 72050  | Kdelc1   | 1810049A1  |
| chr17 | 56359202 | 56359600 | Intergenic | Intergenic | -1089  | NM_17262 | 224897 | Dpp9     | 6430584G1  |
| chr13 | 3584827  | 3584900  | intron (NM | intron (NM | 25491  | NM_13406 | 105203 | Fam208b  | AI645998   |
| chr1  | 36613602 | 36613925 | intron (NM | CpG        | 1463   | NM_00112 | 20353  | Sema4c   | AI426163 ! |

|       |          |          |            |            |         |          |        |            |            |
|-------|----------|----------|------------|------------|---------|----------|--------|------------|------------|
| chr17 | 79168727 | 79168875 | intron (NM | intron (NM | -32901  | NM_01150 | 268980 | Strn       | AU022939   |
| chr12 | 32992227 | 32992350 | Intergenic | RMER15 L   | -71366  | NM_00116 | 72123  | Ccdc71l    | 2010109K1  |
| chr4  | 1.5E+08  | 1.5E+08  | intron (NM | PB1D10 SI  | 2593    | NM_00102 | 433182 | Eno1b      | EG433182   |
| chr13 | 58316752 | 58317300 | promoter-1 | promoter-1 | -12     | NM_02684 | 56085  | Ubqln1     | 1110046HC  |
| chr11 | 77303027 | 77303150 | promoter-1 | promoter-1 | 92      | NM_17294 | 268445 | Ankrd13b   | AW124583   |
| chr7  | 29909927 | 29910000 | intron (NM | intron (NM | 207     | NM_00910 | 20190  | Ryr1       | AI528790 I |
| chr12 | 92621627 | 92621800 | intron (NM | intron (NM | 1136    | NM_18181 | 75216  | Cep128     | 4930534BC  |
| chr11 | 98650652 | 98650825 | Intergenic | Intergenic | -6345   | NM_02872 | 74026  | Msl1       | 2810017F1  |
| chr3  | 1.21E+08 | 1.21E+08 | Intergenic | Intergenic | -38851  | NM_14539 | 213603 | Slc44a3    | BC010552   |
| chr4  | 88766377 | 88766450 | Intergenic | L2a LINE L | -16861  | NM_02443 | 66902  | Mtap       | 1300019I2: |
| chr16 | 31200577 | 31200700 | intron (NM | CpG        | 686     | NM_03013 | 78618  | Acap2      | 4832442G1  |
| chr18 | 39651077 | 39651525 | Intergenic | CpG        | -4402   | NM_00817 | 14815  | Nr3c1      | GR Grl-1 C |
| chr10 | 78036927 | 78037100 | promoter-1 | promoter-1 | -232    | NM_17375 | 216136 | Ilvbl      | 5830463I2: |
| chr15 | 63890477 | 63890925 | intron (NM | intron (NM | 1309    | NM_14484 | 223601 | Fam49b     | 0910001AC  |
| chr15 | 91010327 | 91010400 | intron (NM | intron (NM | 11875   | NM_01199 | 26874  | Abcd2      | ABC39 ALI  |
| chr14 | 32484802 | 32485150 | Intergenic | Intergenic | 30733   | NM_02529 | 26363  | Btd        | -          |
| chr2  | 1.55E+08 | 1.55E+08 | promoter-1 | promoter-1 | -571    | NM_02603 | 67204  | Eif2s2     | 2810026E1  |
| chr9  | 1.23E+08 | 1.23E+08 | promoter-1 | promoter-1 | 142     | NM_02541 | 66202  | 1110059G1- |            |
| chr8  | 55776302 | 55776400 | intron (NM | intron (NM | 27680   | NM_02822 | 244484 | Wdr17      | 3010002I1: |
| chr2  | 1.01E+08 | 1.01E+08 | intron (NM | intron (NM | 205     | NM_02659 | 68170  | B230118HC  | NWC        |
| chr1  | 91351127 | 91351275 | promoter-1 | promoter-1 | -185    | NM_17811 | 347722 | Agap1      | Centg2 Gg  |
| chr1  | 1.65E+08 | 1.65E+08 | promoter-1 | promoter-1 | -89     | NM_00108 | 226562 | Prrc2c     | 1810043M   |
| chr3  | 95105477 | 95105625 | intron (NM | intron (NM | 5175    | NM_00108 | 71790  | Anxa9      | 1110003P1  |
| chr14 | 35582302 | 35582675 | Intergenic | CpG        | -50834  | NM_00816 | 14803  | Grid1      | GluD1 Glu  |
| chr2  | 1.19E+08 | 1.19E+08 | intron (NM | intron (NM | 9119    | NM_00114 | 214230 | Pak6       | 4732456M   |
| chr10 | 79422852 | 79423000 | promoter-1 | promoter-1 | 29      | NM_17545 | 216156 | Wdr18      | 2310012I1( |
| chr16 | 62785952 | 62786025 | intron (NM | Lx8 LINE L | 554     | NM_17892 | 106338 | Nsun3      | 6720484AC  |
| chr11 | 1.01E+08 | 1.01E+08 | exon (NM_  | exon (NM_  | 987     | NM_02789 | 71743  | Coasy      | 1300003GC  |
| chr1  | 1.8E+08  | 1.8E+08  | Intergenic | Intergenic | -27582  | NM_02707 | 69428  | 1700016C1- |            |
| chr6  | 30351427 | 30351700 | promoter-1 | promoter-1 | -346    | NM_02974 | 76788  | Klhdc10    | 2410127E1  |
| chr7  | 51812377 | 51812500 | Intergenic | Intergenic | -3103   | NM_00128 | 22260  | Nr1h2      | AI194859 I |
| chr13 | 91680777 | 91680975 | intron (NM | intron (NM | 80174   | NM_02418 | 66970  | Ssbp2      | 1500004KC  |
| chr7  | 1.07E+08 | 1.07E+08 | intron (NM | intron (NM | 19892   | NM_17538 | 108937 | Rnf169     | 2900057KC  |
| chr1  | 65135677 | 65135825 | Intergenic | Intergenic | -6887   | NM_14476 | 12965  | Crygb      | Cryg-3 DG  |
| chr8  | 48761202 | 48761300 | promoter-1 | promoter-1 | -738    | NM_02350 | 69260  | Ing2       | 2810011M   |
| chr13 | 99726352 | 99726525 | Intergenic | PB1D10 SI  | 28082   | NM_02706 | 69382  | 1700024PC  | H2bl1 Sub  |
| chr10 | 20225477 | 20225725 | intron (NM | intron (NM | 157976  | NM_02793 | 71804  | Mtfr2      | 2610016C2  |
| chr1  | 1.73E+08 | 1.73E+08 | Intergenic | RLTR9B LT  | -1129   | NM_01018 | 14131  | Fcgr3      | CD16       |
| chr8  | 99019427 | 99019650 | Intergenic | Intergenic | -607273 | NM_01032 | 14719  | Got2       | AL022787   |
| chr4  | 70196252 | 70196450 | promoter-1 | promoter-1 | -389    | NM_17269 | 230316 | Megf9      | 4933405H1  |
| chr1  | 92506352 | 92506450 | intron (NM | intron (NM | 6401    | NM_13380 | 108679 | Cops8      | 9430009JO  |
| chr7  | 1.34E+08 | 1.34E+08 | TTS (NM_0  | TTS (NM_0  | 278     | NM_03024 | 67278  | Pagr1a     | 2900092E1  |
| chr1  | 94106402 | 94106625 | Intergenic | Intergenic | -61543  | NM_20722 | 208727 | Hdac4      | 4932408F1  |
| chr7  | 1.09E+08 | 1.09E+08 | intron (NM | intron (NM | 6580    | NM_00104 | 69710  | Arap1      | 2410002L1  |
| chr2  | 34681227 | 34681425 | intron (NM | intron (NM | 429     | NM_00116 | 30050  | Fbxw2      | 2700071L0  |
| chr8  | 24318252 | 24318575 | intron (NM | CpG        | 512     | NM_01874 | 102247 | Agpat6     | AU041707   |
| chr12 | 74419052 | 74419275 | intron (NM | intron (NM | 31328   | NM_00103 | 625098 | Slc38a6    | AW322671   |

|       |          |          |                        |         |           |        |          |            |
|-------|----------|----------|------------------------|---------|-----------|--------|----------|------------|
| chr11 | 1.16E+08 | 1.16E+08 | exon (NM_exon (NM_     | 235     | NM_02955  | 76265  | Tsen54   | 0610034PC  |
| chr17 | 15533177 | 15533500 | non-coding non-coding  | 128     | NM_02420  | 67544  | Fam120b  | 4932442KC  |
| chr10 | 76982027 | 76982175 | Intergenic Intergenic  | -3543   | NM_13399  | 108707 | Fam207a  | 1810008A1  |
| chr1  | 1.22E+08 | 1.22E+08 | Intergenic Intergenic  | 21420   | NM_00103  | 13167  | Dbi      | ACBD1 Act  |
| chr6  | 1.15E+08 | 1.15E+08 | intron (NM intron (NM  | 37704   | NM_01114  | 19016  | Pparg    | Nr1c3 PPA  |
| chr4  | 1.32E+08 | 1.32E+08 | intron (NM intron (NM  | 565     | NM_02792  | 71787  | Trnau1ap | 1110007F0  |
| chr3  | 1.33E+08 | 1.33E+08 | intron (NM intron (NM  | 23365   | NM_02995  | 77669  | Arhgef38 | 9130221D2  |
| chr1  | 1.41E+08 | 1.41E+08 | intron (NM intron (NM  | 597     | NM_02160  | 59125  | Nek7     | 2810460C1  |
| chr6  | 1.18E+08 | 1.18E+08 | Intergenic ERVL-int L' | -38502  | NM_02752  | 70727  | Rasgef1a | 6330404M   |
| chr1  | 63777002 | 63777400 | promoter-1 promoter-1  | 2       | NM_17242  | 75619  | Fastkd2  | 2810421124 |
| chr12 | 60320002 | 60320325 | exon (NM_exon (NM_     | 307     | NM_00103  | 70611  | Fbxo33   | 5730501N2  |
| chr2  | 33725027 | 33725125 | intron (NM B2_Mm2 S    | 18390   | NM_17518  | 72543  | Mvb12b   | 261020001  |
| chr14 | 35487477 | 35487575 | 5' UTR (NM 5' UTR (NM  | 412     | NM_00130  | 218914 | Wapal    | A530089A2  |
| chr10 | 59080602 | 59080750 | Intergenic URR1B DN    | -1236   | NM_00103  | 215999 | Mcu      | 201001201  |
| chr5  | 3418352  | 3418500  | intron (NM intron (NM  | 74114   | NM_00987  | 12571  | Cdk6     | 5830411120 |
| chr8  | 72682452 | 72682600 | intron (NM CpG         | 5849    | NM_00104  | 17259  | Mef2b    | AI451606   |
| chr1  | 1.09E+08 | 1.09E+08 | intron (NM intron (NM  | 10618   | NM_02753  | 70750  | Kdsr     | 6330410P1  |
| chr2  | 1.26E+08 | 1.26E+08 | exon (NM_exon (NM_     | 2574    | NM_02698  | 69185  | Dtwd1    | 1810033AC  |
| chr13 | 1.14E+08 | 1.14E+08 | 3' UTR (NM 3' UTR (NM  | 2841    | NM_00108  | 218630 | Ccno     | C86987 Cc  |
| chr2  | 4985177  | 4985375  | promoter-1 promoter-1  | -292    | NM_18184  | 71648  | Optn     | 493044100  |
| chr2  | 32493577 | 32493725 | Intergenic Intergenic  | -8464   | NM_00793  | 13805  | Eng      | AI528660 I |
| chr15 | 73492177 | 73493175 | Intergenic MIR SINE    | -37502  | NM_00103  | 106068 | Slc45a4  | 9330175BC  |
| chr3  | 1.26E+08 | 1.26E+08 | intron (NM PB1D10 SI   | 40493   | NM_17345  | 271970 | Arsj     | 9330196J0  |
| chr3  | 88373102 | 88373350 | 3' UTR (NM 3' UTR (NM  | -10367  | NM_02544  | 66256  | Ssr2     | 1500032E0  |
| chr19 | 56471377 | 56471825 | promoter-1 promoter-1  | -18     | NM_00761  | 12369  | Casp7    | AI314680 0 |
| chr9  | 78296002 | 78296075 | promoter-1 promoter-1  | 21      | NM_02665  | 68291  | Mto1     | 2310039HC  |
| chr4  | 50971902 | 50971975 | Intergenic RMER17B     | -257612 | NM_00116  | 74914  | Cytc2    | 4930488P1  |
| chr4  | 80652552 | 80652725 | Intergenic Intergenic  | 96048   | NM_02682  | 52829  | Lurap1l  | 1110029AC  |
| chr12 | 1.19E+08 | 1.19E+08 | Intergenic Intergenic  | -1258   | NM_14604  | 217946 | Cdca7l   | BC006933   |
| chr11 | 28243452 | 28243900 | Intergenic Intergenic  | 240648  | NM_00116  | 216613 | Ccdc85a  | -          |
| chr1  | 1.3E+08  | 1.3E+08  | Intergenic Intergenic  | -43558  | NM_14550  | 226414 | Dars     | 5730439G1  |
| chr5  | 1.3E+08  | 1.3E+08  | promoter-1 promoter-1  | 203     | NM_13390  | 100678 | Psph     | AI480570 I |
| chr18 | 38871402 | 38871725 | Intergenic MER58A D    | -110641 | NM_01189  | 24066  | Spry4    | A0300060:  |
| chr5  | 48763427 | 48763625 | promoter-1 promoter-1  | -105    | NM_02575  | 66768  | Pacrgl   | 4933428GC  |
| chr6  | 23585377 | 23585575 | intron (NM (TAATG)n :  | 14829   | NM_19825  | 386611 | Rnf133   | Greul2     |
| chr13 | 89515802 | 89515975 | Intergenic Intergenic  | -164353 | NM_01350  | 12950  | Hapln1   | BB099155   |
| chr14 | 65052977 | 65053225 | intron (NM intron (NM  | 6762    | NM_00125  | 110265 | Msra     | 2310045J2  |
| chr8  | 1.14E+08 | 1.14E+08 | intron (NM ID SINE ID  | 1934    | NM_14621  | 234736 | Rfwd3    | BC027246   |
| chr3  | 96067202 | 96067275 | promoter-1 promoter-1  | 2       | NM_03359  | 97122  | Hist2h4  | H4 X04652  |
| chr7  | 52071777 | 52072100 | promoter-1 promoter-1  | 90      | NR_033136 | 107503 | Atf5     | AFTA Atf7  |
| chr17 | 46094952 | 46095275 | Intergenic Intergenic  | 66999   | NM_00111  | 22339  | Vegfa    | Vegf Vpf   |
| chr8  | 96739252 | 96739425 | intron (NM intron (NM  | 837     | NM_17241  | 71805  | Nup93    | 2410008GC  |
| chr19 | 53967577 | 53967800 | intron (NM intron (NM  | 967     | NM_01105  | 18569  | Pdcd4    | D19Ucla1   |
| chr6  | 1.45E+08 | 1.45E+08 | Intergenic Intergenic  | 117244  | NM_00102  | 12035  | Bcat1    | BCATc Eca  |
| chr17 | 27771127 | 27772650 | intron (NM CpG         | 299     | NM_02596  | 67097  | Rps10    | 2210402AC  |
| chr14 | 62208627 | 62208975 | Intergenic Intergenic  | -8262   | NM_00116  | 66597  | Trim13   | 3110001L1  |
| chr12 | 1.07E+08 | 1.07E+08 | promoter-1 promoter-1  | 14      | NM_01111  | 18789  | Papola   | Pap PapIII |

|       |          |          |                        |         |           |        |          |            |
|-------|----------|----------|------------------------|---------|-----------|--------|----------|------------|
| chr10 | 57694677 | 57694825 | exon (NM_exon (NM_     | 672     | NM_00108  | 664783 | Dux      | AW822073   |
| chr6  | 1E+08    | 1E+08    | promoter-1promoter-1   | -699    | NM_01974  | 56353  | Rybp     | 2410018J2  |
| chr15 | 78859002 | 78859100 | 5' UTR (NM 5' UTR (NM  | 409     | NM_00819  | 14958  | H1f0     | D130017D0  |
| chr5  | 1.08E+08 | 1.08E+08 | intron (NM intron (NM  | -23876  | NM_00126  | 14581  | Gfi1     | AW495828   |
| chr1  | 1.82E+08 | 1.82E+08 | Intergenic L1MEb LIN   | -7245   | NM_00112  | 19165  | Psen2    | ALG-3 Ad4  |
| chr3  | 51505002 | 51505150 | intron (NM intron (NM  | 39961   | NM_17499  | 211666 | Mgst2    | GST2 MGS   |
| chr11 | 1.03E+08 | 1.03E+08 | Intergenic Intergenic  | -6860   | NM_18303  | 353047 | Plekhm1  | AP162 B2   |
| chr10 | 31328877 | 31328950 | exon (NM_exon (NM_     | 618     | NM_00114  | 268291 | Rnf217   | AU016819   |
| chr13 | 1.13E+08 | 1.13E+08 | Intergenic Intergenic  | -186433 | NM_00116  | 77318  | Ankrd55  | C030011J0  |
| chr9  | 37050427 | 37050650 | intron (NM intron (NM  | 12785   | NM_02025  | 56857  | Slc37a2  | G3PP Slc37 |
| chr9  | 70390952 | 70391200 | intron (NM CpG         | 399     | NM_02569  | 66660  | Sltm     | 5730455CC  |
| chr19 | 21728127 | 21728200 | promoter-1promoter-1   | 364     | NM_14609  | 226016 | Abhd17b  | 5730446C1  |
| chr13 | 62231302 | 62231425 | 5' UTR (NM 5' UTR (NM  | 113     | NM_00103  | 630579 | Zfp808   | EG630579   |
| chr1  | 58450077 | 58450350 | intron (NM CpG         | 233     | NM_02582  | 66882  | Bzw1     | 1200015E1  |
| chr2  | 1.04E+08 | 1.04E+08 | exon (NM_exon (NM_     | 222     | NM_00111  | 53872  | Caprin1  | AL022980   |
| chr8  | 1.08E+08 | 1.08E+08 | intron (NM intron (NM  | 1254    | NM_01364  | 19171  | Psmb10   | Mecl-1 Me  |
| chr9  | 1.1E+08  | 1.1E+08  | Intergenic Intergenic  | -37078  | NM_00101  | 382106 | Fbxw24   | EG382106   |
| chr8  | 3648227  | 3648550  | Intergenic Intergenic  | -7382   | NM_00120  | 57264  | Retn     | ADSF Fizz3 |
| chr5  | 65255927 | 65256075 | Intergenic Intergenic  | 61239   | NM_00845  | 16599  | Klf3     | 9930027GC  |
| chr6  | 16848452 | 16848825 | promoter-1promoter-1   | -197    | NM_03119  | 21426  | Tfec     | BB107417   |
| chr14 | 56381627 | 56382675 | TTS (NM_0 TTS (NM_0    | 1886    | NM_02049  | 57260  | Ltb4r2   | 5830462OC  |
| chr9  | 20951202 | 20951350 | intron (NM intron (NM  | 3074    | NM_01674  | 12539  | Cdc37    | p50 p50Cc  |
| chr3  | 88987052 | 88987200 | promoter-1promoter-1   | -21     | NM_00101  | 68521  | Fam189b  | 1110013L0  |
| chr4  | 46648852 | 46649125 | intron (NM intron (NM  | 14083   | NM_19866  | 381605 | Tbc1d2   | A630005AC  |
| chr9  | 45831727 | 45832000 | intron (NML1ME4a LI    | 10960   | NM_02749  | 70661  | Sik3     | 5730525O2  |
| chr19 | 8894752  | 8894900  | exon (NM_exon (NM_     | 935     | NM_00108  | 68693  | Hnrnpul2 | 1110031M   |
| chr10 | 33671152 | 33671275 | promoter-1promoter-1   | -195    | NM_02828  | 72580  | Zufsp    | 2700019DC  |
| chr3  | 86560552 | 86560775 | intron (NM intron (NM  | 164143  | NM_00119  | 70762  | Dclk2    | 6330415M   |
| chr8  | 47296152 | 47296325 | exon (NM_exon (NM_     | 125     | NM_00745  | 11739  | Slc25a4  | AU019225   |
| chr7  | 1.35E+08 | 1.35E+08 | promoter-1promoter-1   | -386    | NM_02688  | 68961  | Phkg2    | 1500017I0  |
| chr3  | 87906677 | 87906750 | intron (NM intron (NM  | 20740   | NM_00103  | 404710 | Iqgap3   | AI593484   |
| chr3  | 60306977 | 60307100 | intron (NM intron (NM  | 1864    | NM_00125  | 56758  | Mbnl1    | Mbnl mKI/  |
| chr12 | 16882027 | 16882400 | Intergenic Intergenic  | -19571  | NM_00907  | 19878  | Rock2    | B230113H1  |
| chr4  | 1.19E+08 | 1.19E+08 | promoter-1promoter-1   | -395    | NM_01173  | 22608  | Ybx1     | 1700102N1  |
| chr1  | 1.95E+08 | 1.95E+08 | intron (NM intron (NM  | 8489    | NM_00127  | 16780  | Lamb3    | -          |
| chr19 | 37609827 | 37609900 | Intergenic Intergenic  | -15045  | NM_17535  | 107371 | Exoc6    | 4833405E0  |
| chr18 | 34683852 | 34684175 | Intergenic Intergenic  | -17536  | NM_14608  | 225358 | Fam13b   | 2610024E2  |
| chr11 | 1.04E+08 | 1.04E+08 | intron (NM intron (NM  | 1767    | NM_00108  | 76719  | Kansl1   | 1700081L1  |
| chr7  | 35903077 | 35903150 | Intergenic CpG         | -1199   | NM_00128  | 12606  | Cebpa    | C/ebpalpha |
| chr8  | 47702102 | 47702175 | promoter-1promoter-1   | 416     | NM_00100  | 408022 | Primpol  | BC065112   |
| chr8  | 1.26E+08 | 1.26E+08 | Intergenic (CAGAGA)r   | 14734   | NM_13395  | 69581  | Rhou     | 2310026M   |
| chr4  | 43057552 | 43057625 | intron (NR_intron (NR_ | 1504    | NR_045567 | 230088 | Fam214b  | B230312A2  |
| chr15 | 38448752 | 38448875 | 5' UTR (NV 5' UTR (NV  | 208     | NM_00110  | 54375  | Azin1    | 1700085L0  |
| chr9  | 1.03E+08 | 1.03E+08 | exon (NM_exon (NM_     | 933     | NM_00113  | 321022 | Cdv3     | 2510010F1  |
| chr4  | 59796452 | 59796700 | intron (NM CpG         | 151     | NM_00101  | 66209  | Inip     | 1110054OC  |
| chr4  | 1.28E+08 | 1.28E+08 | 5' UTR (NV 5' UTR (NV  | 286     | NM_00119  | 54383  | Phc2     | A3galt2 A/ |
| chr12 | 98396677 | 98397050 | Intergenic Intergenic  | 1100684 | NM_00807  | 14420  | Galc     | 2310068BC  |

|       |          |          |            |            |         |           |        |           |            |
|-------|----------|----------|------------|------------|---------|-----------|--------|-----------|------------|
| chr5  | 1.41E+08 | 1.41E+08 | intron (NM | intron (NM | 3581    | NM_00849  | 16848  | Lfng      | AW061165   |
| chr2  | 84650777 | 84650900 | TTS (NM_0  | TTS (NM_0  | 11853   | NM_01994  | 56791  | Ube2l6    | 281048912: |
| chr18 | 77182777 | 77183050 | promoter-1 | promoter-1 | 59      | NM_00103  | 76987  | Hdhd2     | 0610039H1  |
| chr18 | 55293727 | 55293875 | Intergenic | Intergenic | -143967 | NM_17575  | 269023 | Zfp608    | 4932417D1  |
| chr1  | 1.72E+08 | 1.72E+08 | intron (NM | intron (NM | 20590   | NM_02752  | 70729  | Nos1ap    | 6330408P1  |
| chr11 | 96634577 | 96634925 | intron (NM | intron (NM | 4118    | NM_02896  | 74479  | Snx11     | 4933439F1  |
| chr1  | 71668152 | 71668325 | intron (NM | intron (NM | 31570   | NM_01023  | 14268  | Fn1       | E330027I09 |
| chr17 | 29751802 | 29752050 | exon (NM_  | exon (NM_  | 150     | NM_02141  | 58230  | Rnf8      | 3830404E2  |
| chr3  | 1.52E+08 | 1.52E+08 | Intergenic | L2c LINE L | -6513   | NM_17801  | 329777 | Pigk      | 3000001OC  |
| chr4  | 1.5E+08  | 1.5E+08  | intron (NM | URR1B DN   | 57645   | NM_17377  | 242773 | Slc45a1   | C230078B2  |
| chr11 | 59653252 | 59653475 | promoter-1 | promoter-1 | -94     | NM_01199  | 26572  | Cops3     | Csn3 Sgn3  |
| chr9  | 1.08E+08 | 1.08E+08 | intron (NM | intron (NM | 373     | NM_14622  | 235606 | Apeh      | -          |
| chr11 | 87452627 | 87452850 | intron (NM | CpG        | 22072   | NM_00104  | 327992 | Hsf5      | Gm739 MI   |
| chr9  | 1.11E+08 | 1.11E+08 | intron (NM | intron (NM | 823     | NM_00116  | 71268  | Lrrfip2   | 5133400F2  |
| chr4  | 1.41E+08 | 1.41E+08 | intron (NM | intron (NM | -31745  | NM_00108  | 76166  | Rsg1      | 6330545AC  |
| chr17 | 35326127 | 35326275 | promoter-1 | promoter-1 | -816    | NM_01073  | 16988  | Lst1      | B144       |
| chr13 | 23836327 | 23836525 | TTS (NM_1  | TTS (NM_1  | 964     | NM_17565  | 319148 | Hist1h3c  | H3-143     |
| chr2  | 26790677 | 26790800 | intron (NM | intron (NM | 1149    | NM_19862  | 279029 | Stkld1    | Gm711 Sg   |
| chr4  | 1.33E+08 | 1.33E+08 | promoter-1 | promoter-1 | -496    | NR_110978 | 52174  | Tmem222   | 5730406H1  |
| chr1  | 33560052 | 33560125 | intron (NM | intron (NM | 166551  | NM_00892  | 19076  | Prim2     | AI323589   |
| chr7  | 1.49E+08 | 1.49E+08 | Intergenic | Intergenic | -9757   | NM_00114  | 68038  | Chid1     | 3110023E0  |
| chr15 | 6519152  | 6519225  | Intergenic | Intergenic | -10659  | NM_00127  | 23880  | Fyb       | ADAP B630  |
| chr15 | 79521402 | 79521675 | intron (NM | CpG        | 212     | NM_01381  | 14904  | Gtpbp1    | AL022987   |
| chr4  | 1.47E+08 | 1.47E+08 | promoter-1 | promoter-1 | -73     | NM_00102  | 28010  | Miip      | AA553001   |
| chr7  | 19663202 | 19663300 | intron (NM | intron (NM | 1702    | NM_01005  | 13401  | Dmwd      | DMR-N9 D   |
| chr13 | 41009077 | 41009250 | intron (NM | intron (NM | -3840   | NM_13321  | 14538  | Gcnt2     | 5330430K1  |
| chr2  | 69723477 | 69723575 | non-coding | non-coding | 146     | NM_02928  | 75422  | Mettl5    | 2810410AC  |
| chr3  | 89577077 | 89577775 | promoter-1 | promoter-1 | -105    | NM_02731  | 70093  | Ube2q1    | 1110002CC  |
| chr8  | 37596927 | 37597175 | Intergenic | Intergenic | 44806   | NM_17695  | 319582 | 6430573F1 | Kiaa1456   |
| chr14 | 31248602 | 31248850 | intron (NM | intron (NM | -44025  | NM_13376  | 75901  | Dcp1a     | 1110066A2  |
| chr2  | 1.31E+08 | 1.31E+08 | intron (NM | intron (NM | 23894   | NM_00973  | 11990  | Atrn      | AW558010   |
| chr3  | 97723102 | 97723425 | intron (NM | intron (NM | -10833  | NM_00103  | 433632 | Gm5544    | EG433632   |
| chr14 | 15893677 | 15893850 | Intergenic | Intergenic | 240434  | NM_00119  | 674895 | Nek10     | Gm282      |
| chr1  | 88524977 | 88525075 | Intergenic | Intergenic | 41351   | NM_17297  | 26895  | Cops7b    | D1Wsu66e   |
| chr6  | 85401527 | 85403075 | promoter-1 | promoter-1 | -337    | NR_028087 | 73327  | Pradc1    | 1700040I0: |
| chr2  | 66610527 | 66610875 | intron (NM | intron (NM | 12266   | NM_00913  | 20272  | Scn7a     | 1110034KC  |
| chr8  | 89411977 | 89412050 | Intergenic | Intergenic | -2856   | NM_03056  | 80750  | N4bp1     | AI481586 0 |
| chr11 | 1.01E+08 | 1.01E+08 | intron (NM | intron (NM | 512     | NM_21366  | 20848  | Stat3     | 1110034CC  |
| chr5  | 65726552 | 65726900 | intron (NM | CpG        | 152     | NM_01125  | 19687  | Rfc1      | 140kDa Al  |
| chr3  | 1.27E+08 | 1.27E+08 | intron (NM | intron (NM | 682     | NM_14513  | 211550 | Tifa      | T2bp       |
| chr13 | 67033777 | 67033950 | promoter-1 | promoter-1 | 97      | NM_00895  | 19210  | Ptdss1    | AU044268   |
| chr11 | 77500677 | 77500775 | intron (NM | CpG        | 1085    | NM_00102  | 68564  | Nufip2    | 1110001M   |
| chr9  | 1.08E+08 | 1.08E+08 | intron (NM | intron (NM | 8243    | NM_02894  | 74443  | P4htm     | 4933406E2  |
| chr4  | 1.09E+08 | 1.09E+08 | intron (NM | intron (NM | 326     | NM_02745  | 70533  | Btf3l4    | 4632412E0  |
| chr2  | 1.32E+08 | 1.32E+08 | intron (NM | CpG        | 112     | NM_00127  | 19122  | Prnp      | AA960666   |
| chr17 | 4791977  | 4792100  | Intergenic | Intergenic | -203036 | NM_00108  | 239985 | Arid1b    | 8030481M   |
| chr6  | 71494177 | 71494250 | intron (NM | CpG        | 365     | NM_02578  | 66700  | Chmp3     | 25.1 4921! |

|       |          |          |               |             |        |           |        |            |            |
|-------|----------|----------|---------------|-------------|--------|-----------|--------|------------|------------|
| chr2  | 27342927 | 27343100 | Intergenic    | Intergenic  | -11820 | NM_00111  | 67382  | Brd3       | 2410084F2  |
| chr14 | 1.06E+08 | 1.06E+08 | Intergenic    | Lx9 LINE L  | -83227 | NM_19860  | 212085 | Trim52     | 4921513BC  |
| chr19 | 34952277 | 34952425 | promoter-1    | promoter-1  | 56     | NM_02379  | 75735  | Pank1      | Pank Pank  |
| chr11 | 96836102 | 96836500 | intron (NM    | intron (NM  | 2701   | NM_03022  | 78912  | Sp2        | 49304801U  |
| chr7  | 88994152 | 88994500 | Intergenic    | Intergenic  | -9561  | NR_11191( | 107769 | Tm6sf1     | AI428514 I |
| chr2  | 1.26E+08 | 1.26E+08 | intron (NM    | URR1B DN    | 3315   | NM_00127  | 14391  | Gabpb1     | BABPB2 E4  |
| chr9  | 18096802 | 18096950 | exon (NM_     | exon (NM_   | 165    | NM_02584  | 66917  | Chordc1    | 1110001OC  |
| chr5  | 66497227 | 66497425 | intron (NM    | intron (NM  | -7908  | NM_13906  | 245945 | Rbm47      | 9530077J1' |
| chr3  | 30993402 | 30993500 | promoter-1    | promoter-1  | -529   | NM_01138  | 20482  | Skil       | Skir SnoN  |
| chr17 | 15853002 | 15853200 | intron (NM    | intron (NM  | 11170  | NM_00769  | 12648  | Chd1       | 4930525N2  |
| chr12 | 80292352 | 80292500 | intron (NM    | intron (NM  | 380    | NM_02155  | 17252  | Rdh11      | 2610319N2  |
| chr4  | 1.23E+08 | 1.23E+08 | promoter-1    | promoter-1  | -416   | NM_00850  | 16918  | Mycl       | AW536278   |
| chr5  | 9161477  | 9161675  | intron (NM    | CpG         | 200    | NM_00111  | 23857  | Dmtf1      | Dimp Dmp   |
| chr13 | 49061627 | 49061725 | intron (NM    | intron (NM  | 1521   | NM_00103  | 218236 | Fam120a    | C9orf10 O: |
| chr7  | 31514052 | 31514125 | TTS (NM_0     | TTS (NM_0   | 465    | NM_02721  | 69804  | Tmem147    | 2010004E1  |
| chr19 | 4962302  | 4962625  | exon (NM_     | exon (NM_   | 157    | NM_02555  | 66419  | Mrpl11     | 2410001PC  |
| chr17 | 13202877 | 13203050 | intron (NM    | intron (NM  | 2258   | NM_01367  | 20656  | Sod2       | MnSOD Sc   |
| chr11 | 1.07E+08 | 1.07E+08 | intron (NR_   | intron (NR_ | 7923   | NM_00103  | 380732 | Milr1      | Allergin-1 |
| chr2  | 1.02E+08 | 1.02E+08 | intron (NM    | Charlie19a  | 31566  | NM_17888  | 241576 | Ldlrad3    | 6430500PC  |
| chr1  | 1.08E+08 | 1.08E+08 | Intergenic    | Intergenic  | -25095 | NM_00112  | 227449 | Zcchc2     | 9930114B2  |
| chr16 | 77084377 | 77084650 | intron (NM    | intron (NM  | 70199  | NM_01391  | 30940  | Usp25      | -          |
| chr16 | 51967202 | 51967425 | Intergenic    | Intergenic  | -64349 | NM_00103  | 208650 | Cblb       | AI429560 , |
| chr8  | 26707327 | 26707450 | intron (NM    | intron (NM  | 571    | NM_17301  | 270035 | Letm2      | 6030453H1  |
| chr6  | 1.34E+08 | 1.34E+08 | intron (NM    | intron (NM  | 576    | NM_00796  | 14011  | Etv6       | AW123102   |
| chr11 | 57917902 | 57917975 | intron (NM    | CpG         | 283    | NM_02694  | 69125  | Cnot8      | 150001510  |
| chr2  | 1.68E+08 | 1.68E+08 | Intergenic    | Intergenic  | -98864 | NM_01120  | 19246  | Ptpn1      | PTP-1B PTI |
| chr11 | 32355477 | 32355625 | intron (NM    | CpG         | 179    | NM_17378  | 327900 | Ubtcd2     | 4930571L2  |
| chr16 | 57196677 | 57196825 | intron (NML1_ | Rod LIF     | -29306 | NM_02317  | 52633  | Nit2       | 1190017B1  |
| chr1  | 1.68E+08 | 1.68E+08 | Intergenic    | Intergenic  | -26963 | NM_00103  | 226594 | Rcsd1      | A430105K1  |
| chr18 | 73862902 | 73863125 | intron (NM    | CpG         | 382    | NM_00854  | 17128  | Smad4      | AW743858   |
| chr5  | 38894202 | 38894500 | promoter-1    | promoter-1  | -960   | NM_14555  | 117591 | Slc2a9     | Glut9 SLC2 |
| chr9  | 57491577 | 57491650 | intron (NM    | intron (NM  | 1374   | NM_00778  | 12988  | Csk        | AW212630   |
| chr9  | 21216452 | 21216550 | promoter-1    | promoter-1  | 220    | NM_02188  | 60507  | Qtrt1      | 2610028E1  |
| chr8  | 61184327 | 61184400 | intron (NMR   | MER5 LTI    | -4770  | NM_00117  | 1E+08  | Gm15881    | OTTMUSG(   |
| chr9  | 44903302 | 44903450 | intron (NM    | intron (NM  | 16110  | NM_00100  | 270152 | Amica1     | AMICA Cre  |
| chr12 | 70343277 | 70343450 | intron (NM    | intron (NM  | 544    | NM_17825  | 271005 | Klhdc1     | -          |
| chr5  | 1.09E+08 | 1.09E+08 | intron (NM    | intron (NM  | 1609   | NM_17288  | 243197 | Mfsd7a     | 4732482E2  |
| chr13 | 70780277 | 70780475 | Intergenic    | Intergenic  | -3864  | NM_14483  | 218333 | Ice1       | C77245 ml  |
| chr3  | 1.43E+08 | 1.43E+08 | intron (NM    | CpG         | 492    | NM_17865  | 109333 | Pkn2       | 6030436C2  |
| chr8  | 86257152 | 86257275 | intron (NM    | RLTR40 LT   | 7997   | NM_00116  | 26364  | Cd97       | AA409984   |
| chr3  | 50247777 | 50248000 | promoter-1    | promoter-1  | -353   | NM_01199  | 26570  | Slc7a11    | 9930009M   |
| chr8  | 11556627 | 11556800 | 5' UTR (NV    | 5' UTR (NV  | 647    | NM_01191  | 26356  | Ing1       | 2610028J2  |
| chr15 | 80663127 | 80663800 | intron (NM    | intron (NM  | 34423  | NM_17712  | 213988 | Tnrc6b     | 2700090M   |
| chr3  | 1.02E+08 | 1.02E+08 | Intergenic    | Intergenic  | -24237 | NM_00103  | 242126 | Slc22a15   | 2610034P2  |
| chr3  | 1.42E+08 | 1.42E+08 | intron (NM    | intron (NM  | 249    | NM_01026  | 14469  | Gbp2       | -          |
| chr7  | 38999902 | 39000100 | Intergenic    | Intergenic  | 13012  | NM_02441  | 72287  | Plekhf1    | 1810013PC  |
| chr9  | 15104702 | 15104775 | intron (NMB3  | SINE B:     | 1313   | NM_13373  | 70984  | 4931406CC- |            |



|       |          |          |            |            |         |           |        |          |             |
|-------|----------|----------|------------|------------|---------|-----------|--------|----------|-------------|
| chr3  | 50652977 | 50653200 | Intergenic | Intergenic | -375281 | NM_00983  | 12457  | Ccrn4l   | AU043840    |
| chr6  | 16785652 | 16785975 | intron (NM | intron (NM | 62628   | NM_03119  | 21426  | Tfec     | BB107417    |
| chr6  | 86321102 | 86321400 | promoter-1 | promoter-1 | -283    | NM_02650  | 68011  | Snrpg    | 2810024K1   |
| chr1  | 94538502 | 94538575 | promoter-1 | promoter-1 | -13     | NR_028108 | 66915  | Myeov2   | 1110002M    |
| chr5  | 92747627 | 92747825 | Intergenic | LTR33C LT  | -8676   | NM_17271  | 231452 | Sdad1    | 4931421J1   |
| chr4  | 1.34E+08 | 1.34E+08 | Intergenic | RMER20B    | -25971  | NM_20723  | 230815 | Man1c1   | AI593348    |
| chr8  | 98012377 | 98012600 | 5' UTR (NV | 5' UTR (NV | 232     | NM_00997  | 13000  | Csnk2a2  | 1110035J2   |
| chr13 | 75962027 | 75962450 | Intergenic | Intergenic | -15096  | NM_05310  | 93692  | Glrx     | C86710 D1   |
| chr5  | 1.23E+08 | 1.23E+08 | promoter-1 | promoter-1 | 98      | NM_01980  | 56317  | Anapc7   | APC7 AW5    |
| chr7  | 87572727 | 87572900 | Intergenic | Lx7 LINE L | -22496  | NM_00108  | 18550  | Furin    | 9130404I0   |
| chr1  | 62770552 | 62770925 | intron (NM | intron (NM | 20847   | NM_00107  | 18187  | Nrp2     | 1110048PC   |
| chr18 | 76404352 | 76404425 | intron (NM | intron (NM | 3033    | NM_01075  | 17126  | Smad2    | 7120426M    |
| chr12 | 70473152 | 70473375 | intron (NM | CpG        | 126     | NM_00748  | 11845  | Arf6     | AI788669 ,  |
| chr6  | 54668777 | 54668925 | Intergenic | MIRb SINE  | 37233   | NM_00128  | 68235  | Mturn    | 2410066E1   |
| chr6  | 1.2E+08  | 1.2E+08  | promoter-1 | promoter-1 | 86      | NR_045558 | 67200  | Ccdc77   | 2400002C2   |
| chr11 | 75993602 | 75993775 | promoter-1 | promoter-1 | -556    | NM_02666  | 68299  | Vps53    | 2010002AC   |
| chr7  | 1.34E+08 | 1.34E+08 | Intergenic | Intergenic | -12589  | NM_01195  | 26417  | Mapk3    | Erk-1 Erk1  |
| chr18 | 46440027 | 46440350 | intron (NM | CpG        | 316     | NM_17262  | 225467 | Pggt1b   | 2010207C1   |
| chr4  | 83595652 | 83595725 | Intergenic | MIR SINE   | 424239  | NM_00108  | 320226 | Ccdc171  | 4930418J0   |
| chr1  | 1.38E+08 | 1.38E+08 | 5' UTR (NV | 5' UTR (NV | 305     | NM_00108  | 67886  | Camsap2  | 1600013L1   |
| chr10 | 10176777 | 10177125 | intron (NM | intron (NM | 15161   | NM_00112  | 215772 | Adgb     | 9130014G2   |
| chr1  | 1.62E+08 | 1.62E+08 | promoter-1 | promoter-1 | -228    | NM_00978  | 12301  | Cacybp   | SIP         |
| chr2  | 10274702 | 10274825 | Intergenic | Intergenic | -17315  | NM_00119  | 353282 | Sfmbt2   | D2Wsu23e    |
| chr18 | 33160752 | 33160900 | intron (NM | intron (NM | 62131   | NM_00979  | 12326  | Camk4    | A430110E2   |
| chr6  | 88705252 | 88705325 | intron (NM | intron (NM | 30590   | NM_00116  | 23945  | Mgll     | AA589436    |
| chr16 | 19203602 | 19204225 | Intergenic | MMERVK1    | 82921   | NM_14645  | 258443 | Olf164   | MOR279-2    |
| chr15 | 43114002 | 43114250 | intron (NM | CpG        | 156     | NM_00838  | 16341  | Eif3e    | 48kDa Eif3  |
| chr1  | 42908002 | 42908700 | intron (NM | CpG        | 273     | NM_02351  | 69527  | Mrps9    | 2310002AC   |
| chr6  | 1.23E+08 | 1.23E+08 | promoter-1 | promoter-1 | -12     | NM_01994  | 56619  | Clec4e   | C86253 Cl   |
| chr10 | 67743027 | 67743200 | Intergenic | Intergenic | -1639   | NM_02359  | 71371  | Arid5b   | 4930580B1   |
| chr2  | 94017777 | 94017950 | Intergenic | Intergenic | -19797  | NM_01965  | 56348  | Hsd17b12 | 2610510OC   |
| chr5  | 97224302 | 97224450 | intron (NM | intron (NM | 1972    | NM_01347  | 11745  | Anxa3    | Anx3        |
| chr14 | 78770152 | 78770225 | Intergenic | L2a LINE L | -62338  | NM_01161  | 21943  | Tnfsf11  | Ly109I OD   |
| chr7  | 52151652 | 52151800 | exon (NM_  | exon (NM_  | 277     | NM_02737  | 70300  | Fuz      | 2600013E0   |
| chr14 | 65634152 | 65634250 | intron (NM | intron (NM | 65319   | NM_00125  | 210925 | Ints9    | BC028953    |
| chr19 | 24611477 | 24611675 | intron (NM | intron (NM | 18741   | NM_00884  | 18719  | Pip5k1b  | PI4P5K-I[b] |
| chr1  | 1.49E+08 | 1.49E+08 | intron (NM | intron (NM | 348321  | NM_00114  | 215378 | Brinp3   | B830045N:   |
| chr11 | 49838252 | 49838450 | promoter-1 | promoter-1 | -482    | NM_02154  | 59044  | Rnf130   | G1RZFP G1   |
| chr4  | 32887127 | 32887275 | promoter-1 | promoter-1 | -33     | NM_17536  | 108755 | Lym2     | 2610208E0   |
| chr19 | 8756527  | 8756750  | 3' UTR (NV | 3' UTR (NV | 18143   | NM_00111  | 12669  | Chrm1    | Chrm-1 M:   |
| chr14 | 55494977 | 55495100 | 3' UTR (NV | 3' UTR (NV | 1337    | NM_00116  | 105651 | Ppp1r3e  | A630071A1   |
| chr16 | 10784752 | 10785025 | exon (NM_  | exon (NM_  | 741     | NM_00989  | 12703  | Socs1    | Cish1 Cish' |
| chr14 | 63768977 | 63769175 | intron (NM | MER58A D   | 27554   | NM_01019  | 14137  | Fdft1    | SQS SS      |
| chr7  | 74904552 | 74904650 | promoter-1 | promoter-1 | 27      | NM_18331  | 233335 | Synm     | 4930412K2   |
| chr9  | 91481452 | 91481700 | Intergenic | Intergenic | 217766  | NM_00957  | 22774  | Zic4     | -           |
| chr7  | 52689727 | 52690050 | promoter-1 | promoter-1 | -54     | NM_01130  | 20174  | Ruvbl2   | mp47 p47    |
| chr1  | 65224477 | 65224775 | intron (NM | intron (NM | 1090    | NM_01049  | 15926  | Idh1     | AI314845 ,  |

|       |          |          |            |            |          |          |        |         |             |
|-------|----------|----------|------------|------------|----------|----------|--------|---------|-------------|
| chr5  | 37183327 | 37183450 | Intergenic | Intergenic | 4605     | NM_02624 | 67568  | Mrfap1  | 913041312   |
| chr5  | 77380377 | 77381000 | promoter-1 | promoter-1 | -85      | NM_17214 | 231327 | Ppat    | 5730454C1   |
| chr3  | 96838752 | 96838825 | intron (NM | intron (NM | 2463     | NM_00812 | 14613  | Gja5    | 5730555N1   |
| chr10 | 1.26E+08 | 1.26E+08 | promoter-1 | promoter-1 | -883     | NM_00987 | 12567  | Cdk4    | Crk3        |
| chr2  | 1.32E+08 | 1.32E+08 | intron (NM | intron (NM | 10398    | NM_17544 | 215653 | Rassf2  | 3830431HC   |
| chr15 | 76077527 | 76077700 | intron (NM | CpG        | 376      | NM_02316 | 66168  | Grina   | 1110025J1.  |
| chr8  | 1.07E+08 | 1.07E+08 | exon (NM_  | exon (NM_  | 219      | NM_15358 | 97487  | Cmtm4   | Cklfsf4 D1! |
| chr1  | 99666127 | 99666200 | promoter-1 | promoter-1 | 506      | NM_17376 | 227399 | Ppip5k2 | AW555814    |
| chr19 | 53466327 | 53466550 | Intergenic | Intergenic | -1375    | NM_17242 | 76479  | Smndc1  | 2410004J2.  |
| chr14 | 73487077 | 73487550 | Intergenic | Intergenic | -38392   | NM_00116 | 70086  | Cysltr2 | 2300001HC   |
| chr13 | 35944452 | 35944550 | intron (NM | intron (NM | 53715    | NM_14593 | 208366 | Rpp40   | D8Bwg126.   |
| chr15 | 81689827 | 81689950 | Intergenic | Intergenic | -1132    | NM_02050 | 57259  | Tob2    | 2900090N2   |
| chr19 | 6128077  | 6128275  | promoter-1 | promoter-1 | 39       | NM_02691 | 69024  | Snx15   | 1500032BC   |
| chr13 | 41096552 | 41096800 | 5' UTR (NM | 5' UTR (NM | 297      | NM_02655 | 68083  | Pak1ip1 | 583043111!  |
| chr4  | 1.36E+08 | 1.36E+08 | Intergenic | Intergenic | -6149    | NM_01373 | 27224  | Tceb3   | 110kDa A/   |
| chr2  | 33324227 | 33324375 | promoter-1 | promoter-1 | -249     | NM_00102 | 71834  | Zbtb43  | 1700010E0   |
| chr8  | 97488827 | 97489125 | Intergenic | Intergenic | -12033   | NM_00119 | 14766  | Gpr56   | Cyt28 TM7   |
| chr11 | 67402102 | 67402250 | intron (NM | intron (NM | 2174     | NM_00110 | 14457  | Gas7    | AW124766    |
| chr14 | 73177652 | 73178000 | Intergenic | MLT1J LTR  | -68016   | NM_20763 | 319448 | Fndc3a  | 1700094E1   |
| chr3  | 7503477  | 7503600  | intron (NM | CpG        | 112      | NM_17318 | 67306  | Zc2hc1a | 3110050N2   |
| chr10 | 66559552 | 66559650 | 5' UTR (NM | 5' UTR (NM | 135      | NM_00120 | 28193  | Reep3   | D10Ucla1    |
| chr7  | 87530777 | 87530900 | intron (NM | MIRm SINI  | 1994     | NM_01019 | 14159  | Fes     | AI586313 I  |
| chr18 | 75054052 | 75054225 | Intergenic | Intergenic | 66779    | NM_01072 | 16891  | Lipg    | 3110013KC   |
| chr17 | 34523752 | 34523900 | TTS (NM_0  | TTS (NM_0  | 9749     | NM_00111 | 1E+08  | Btnl1   | Btnl3 Gm3   |
| chr5  | 44179627 | 44179925 | Intergenic | Intergenic | -6388    | NM_17872 | 242960 | Fbxl5   | Fbl4 Fir4   |
| chr7  | 17497502 | 17497625 | Intergenic | Intergenic | 5724     | NM_00896 | 19222  | Ptgir   | IP PGI2     |
| chr16 | 17209102 | 17209250 | exon (NM_  | exon (NM_  | 948      | NM_00103 | 239731 | Rimbp3  | Gm1759 G    |
| chr15 | 76060002 | 76060325 | promoter-1 | promoter-1 | -236     | NM_20138 | 18810  | Plec    | AA591047    |
| chr14 | 46365977 | 46366225 | Intergenic | Intergenic | -88283   | NM_00104 | 114874 | Ddhd1   | PA-PLA1     |
| chr13 | 1.03E+08 | 1.03E+08 | Intergenic | Intergenic | -84904   | NM_00107 | 18708  | Pik3r1  | PI3K p50aI  |
| chr15 | 99222702 | 99222800 | promoter-1 | promoter-1 | -627     | NM_02666 | 110213 | Tmbim6  | 5031406PC   |
| chr1  | 51562602 | 51562725 | Intergenic | Intergenic | -27420   | NM_02869 | 109019 | Nabp1   | 4930434HC   |
| chr9  | 72122252 | 72123000 | promoter-1 | promoter-1 | -80      | NM_14622 | 235469 | Zfp280d | A930005FC   |
| chr9  | 72380252 | 72380325 | promoter-1 | promoter-1 | 241      | NM_00103 | 319758 | Rfx7    | 2510005N2   |
| chr11 | 1.01E+08 | 1.01E+08 | intron (NM | CpG        | 429      | NM_01128 | 19942  | Rpl27   | -           |
| chr19 | 53112777 | 53112975 | intron (NM | CpG        | 268      | NM_13321 | 170750 | Xpnpep1 | D230045I0   |
| chr1  | 1.66E+08 | 1.66E+08 | promoter-1 | promoter-1 | -476     | NM_05408 | 116914 | Slc19a2 | AV276020    |
| chr7  | 29135702 | 29135975 | promoter-1 | promoter-1 | 130      | NM_01364 | 20055  | Rps16   | AA420385    |
| chr10 | 60837852 | 60837925 | intron (NM | intron (NM | 8383     | NM_01375 | 27355  | Pald1   | MMPAL Pa    |
| chr4  | 45076827 | 45076925 | intron (NM | intron (NM | 20600    | NM_00102 | 269529 | Fbxo10  | FBX10 Gm    |
| chr9  | 41934852 | 41934950 | Intergenic | Intergenic | -2529    | NM_01143 | 20660  | Sorl1   | 2900010L1   |
| chr10 | 20866077 | 20866400 | exon (NM_  | exon (NM_  | 14552    | NM_00119 | 17863  | Myb     | AI550390 I  |
| chr1  | 1.33E+08 | 1.33E+08 | exon (NM_  | exon (NM_  | 25354    | NM_01070 | 16865  | Eif2d   | D1ErtD5e I  |
| chr1  | 23407052 | 23407150 | Intergenic | Intergenic | -17087   | NM_00108 | 70155  | Ogfrl1  | 2210417C1   |
| chr13 | 52633752 | 52633875 | Intergenic | Intergenic | -7608    | NM_00102 | 68203  | Diras2  | 2900052J1.  |
| chr13 | 6888802  | 6888950  | Intergenic | RLTR45 LT  | -240859  | NM_00129 | 56421  | Pfkip   | 1200015H2   |
| chr1  | 1.06E+08 | 1.06E+08 | Intergenic | B4 SINE B. | -1004495 | NM_01180 | 23836  | Cdh20   | Cdh7        |

|       |          |          |            |             |         |          |        |            |            |
|-------|----------|----------|------------|-------------|---------|----------|--------|------------|------------|
| chr9  | 1.08E+08 | 1.08E+08 | TTS (NM_0  | TTS (NM_0   | 369     | NM_02780 | 71472  | Usp19      | 843042110  |
| chr7  | 1.28E+08 | 1.28E+08 | intron (NM | CpG         | 160     | NM_02589 | 67003  | Uqcrc2     | 150000400  |
| chr9  | 48075077 | 48075225 | Intergenic | Intergenic  | 73830   | NM_03006 | 78252  | Nxpe2      | 4432416J0  |
| chr1  | 84718702 | 84719050 | 3' UTR (NV | 3' UTR (NV  | -26080  | NM_15291 | 227325 | Dner       | A930026D:  |
| chr10 | 69558102 | 69558175 | Intergenic | Intergenic  | -1731   | NM_00111 | 76551  | Ccdc6      | 2810012H1  |
| chr4  | 1.55E+08 | 1.55E+08 | intron (NM | intron (NM  | 40202   | NM_00108 | 76866  | Morn1      | 2900057D2  |
| chr10 | 20671802 | 20672125 | promoter-1 | promoter-1  | -390    | NM_02620 | 52906  | Ahi1       | 1700015F0  |
| chr17 | 32670977 | 32671150 | Intergenic | Intergenic  | -2511   | NM_02444 | 70101  | Cyp4f16    | 2310021J0  |
| chr13 | 47070427 | 47070500 | Intergenic | RLTR12B L   | 39756   | NM_17534 | 105193 | Nhlrc1     | AI505271 I |
| chr17 | 65958152 | 65958225 | intron (NM | ID_B1 SIN   | 4707    | NM_01393 | 30960  | Vapa       | 33kDa VAF  |
| chr3  | 95021652 | 95021900 | promoter-1 | promoter-1  | 88      | NM_17251 | 213054 | Gabpb2     | 1810015F0  |
| chr11 | 98885877 | 98886000 | promoter-1 | promoter-1  | -435    | NM_01162 | 21973  | Top2a      | Top-2      |
| chr1  | 93391227 | 93391350 | promoter-1 | promoter-1  | 43      | NM_02871 | 74019  | Traf3ip1   | 3930402DC  |
| chr15 | 96539202 | 96540825 | Intergenic | CpG         | -9884   | NM_17512 | 67760  | Slc38a2    | 5033402L1  |
| chr14 | 47993777 | 47993950 | intron (NM | CpG         | 328     | NM_00114 | 16854  | Lgals3     | GBP L-34   |
| chr7  | 1.16E+08 | 1.16E+08 | Intergenic | Lx8 LINE L  | -13306  | NM_02188 | 22141  | Tub        | rd5 tub    |
| chr3  | 94914777 | 94914975 | promoter-1 | promoter-1  | -88     | NM_00933 | 21427  | Vps72      | Tcfl1 YL-1 |
| chr1  | 99134277 | 99134475 | Intergenic | Intergenic  | -109496 | NM_02894 | 74441  | Slco6c1    | 4933404A1  |
| chr9  | 1.18E+08 | 1.18E+08 | promoter-1 | promoter-1  | -612    | NM_02644 | 67899  | Cmc1       | 2010110K1  |
| chr15 | 91473277 | 91473400 | Intergenic | Intergenic  | -30317  | NM_02573 | 66725  | Lrrk2      | 4921513O2  |
| chr9  | 1.03E+08 | 1.03E+08 | intron (NM | intron (NM  | 8266    | NM_00108 | 28135  | Cep63      | 4921501M   |
| chr6  | 56874227 | 56874325 | promoter-1 | promoter-1  | -350    | NM_02600 | 107569 | Nt5c3      | 1600024PC  |
| chr8  | 1.23E+08 | 1.23E+08 | intron (NM | CpG         | 421     | NM_13396 | 102193 | Zdhhc7     | AL024087   |
| chr10 | 62066127 | 62066250 | Intergenic | URR1A DN    | -1142   | NM_01955 | 56200  | Ddx21      | AI255159 , |
| chr2  | 36126727 | 36127050 | Intergenic | Intergenic  | 40942   | NM_00896 | 19224  | Ptgs1      | COX1 Cox-  |
| chr14 | 51550952 | 51551150 | promoter-1 | promoter-1  | -527    | NM_00103 | 219024 | Tmem55b    | BC039161   |
| chr1  | 1.09E+08 | 1.09E+08 | 3' UTR (NV | 3' UTR (NV  | 20058   | NM_19802 | 241197 | Serpinb10  | 9830131GC  |
| chr12 | 56538027 | 56538375 | Intergenic | Intergenic  | 38389   | NM_01196 | 26443  | Psma6      | IOTA       |
| chr6  | 92133602 | 92133725 | intron (NM | CpG         | 354     | NM_02557 | 64658  | Mrps25     | 2810429NC  |
| chr12 | 83240427 | 83240575 | Intergenic | Intergenic  | -30502  | NM_00116 | 217692 | Sipa1l1    | 4931426N1  |
| chr11 | 62037527 | 62037825 | Intergenic | MLT1A0 L    | -24810  | NM_00741 | 11541  | Adora2b    | A2BAR A2I  |
| chr14 | 8912852  | 8913125  | 5' UTR (NV | 5' UTR (NV  | 161     | NM_02593 | 67053  | Rpp14      | 2610511E0  |
| chr6  | 1.29E+08 | 1.29E+08 | Intergenic | 4.5SRNA si  | 27883   | NM_00852 | 17059  | Klrb1c     | AI462337 c |
| chr5  | 33994602 | 33994750 | exon (NM_  | exon (NM_   | 547     | NM_00128 | 20492  | Slbp       | -          |
| chr2  | 1.53E+08 | 1.53E+08 | intron (NM | CpG         | 191     | NM_00119 | 99311  | Commd7     | 2310010I2: |
| chr3  | 1.08E+08 | 1.08E+08 | promoter-1 | promoter-1  | -224    | NM_00116 | 14865  | Gstm4      | 1110004G1  |
| chr15 | 13641827 | 13642075 | Intergenic | IAP-d-int L | -538557 | NM_00766 | 12563  | Cdh6       | K-cadherin |
| chr4  | 1.06E+08 | 1.06E+08 | promoter-1 | promoter-1  | -505    | NM_18322 | 329908 | Usp24      | 2700066KC  |
| chr8  | 1.22E+08 | 1.22E+08 | intron (NM | B1F1 SINE   | 12891   | NM_02807 | 72042  | Cotl1      | 1810074P2  |
| chr9  | 1.24E+08 | 1.24E+08 | Intergenic | RSINE1 SIN  | 7841    | NM_00987 | 12581  | Cdkn2d     | INK4d p19  |
| chr1  | 37808502 | 37808925 | Intergenic | Intergenic  | -32057  | NM_02809 | 72097  | 2010300CC- |            |
| chr3  | 40754777 | 40754950 | intron (NM | CpG-9138    | 310     | NM_00104 | 214048 | Larp1b     | 1700108L2  |
| chr3  | 1.16E+08 | 1.16E+08 | Intergenic | Intergenic  | -84578  | NM_00790 | 13609  | S1pr1      | AI849002 I |
| chr5  | 1.23E+08 | 1.23E+08 | intron (NM | intron (NM  | 3843    | NM_17542 | 109305 | Orai1      | D730049H0  |
| chr5  | 1.19E+08 | 1.19E+08 | Intergenic | Intergenic  | 131415  | NM_00108 | 76792  | 2410131K1- |            |
| chr11 | 33910077 | 33910375 | Intergenic | Intergenic  | -17033  | NM_00119 | 70357  | Kcnp1      | KCHIP1 Kc  |
| chr5  | 91460677 | 91460800 | intron (NM | intron (NM  | 4195    | NM_05308 | 71920  | Epgn       | 2310069M   |

|       |          |          |              |            |         |          |        |            |            |
|-------|----------|----------|--------------|------------|---------|----------|--------|------------|------------|
| chr16 | 49854952 | 49855075 | promoter-1   | promoter-1 | -754    | NM_01058 | 16423  | Cd47       | 9130415E2  |
| chr4  | 66512952 | 66513325 | Intergenic   | Intergenic | 24293   | NM_02129 | 21898  | Tlr4       | Lps Ly87 F |
| chr14 | 69573277 | 69573550 | Intergenic   | Intergenic | -73933  | NM_00928 | 20855  | Stc1       | Stc        |
| chr3  | 1.31E+08 | 1.31E+08 | Intergenic   | Intergenic | -97735  | NM_00100 | 68436  | Rpl34      | 1100001I2: |
| chr10 | 89185027 | 89185200 | intron (NM   | intron (NM | 9927    | NM_02591 | 67019  | Actr6      | 2010200JO  |
| chr7  | 1.46E+08 | 1.46E+08 | intron (NM   | intron (NM | -11545  | NM_00116 | 57740  | Stk32c     | PKE Pkek ' |
| chr11 | 69209702 | 69209925 | promoter-1   | promoter-1 | 520     | NM_03008 | 78304  | Naa38      | 1500034E0  |
| chr15 | 76437702 | 76438025 | exon (NM_    | exon (NM_  | 158     | NM_05319 | 94230  | Cpsf1      | -          |
| chr5  | 4530827  | 4531125  | Intergenic   | Intergenic | 227240  | NM_02145 | 14362  | Fzd1       | AW227548   |
| chr9  | 49811452 | 49811625 | Intergenic   | Intergenic | -204364 | NM_01087 | 17967  | Ncam1      | CD56 E-NC  |
| chr14 | 75595452 | 75595725 | intron (NM   | intron (NM | -46506  | NM_01977 | 56373  | Cpb2       | 1110032PC  |
| chr15 | 78700177 | 78700275 | Intergenic   | Intergenic | -7394   | NM_14592 | 106039 | Gga1       | 4930406E1  |
| chr19 | 44221027 | 44221125 | promoter-1   | promoter-1 | -140    | NM_02860 | 73689  | Bloc1s2    | 2410089B1  |
| chrX  | 1.04E+08 | 1.04E+08 | intron (NM   | intron (NM | 792     | NM_00128 | 58861  | Cysltr1    | BB147369   |
| chr9  | 72907152 | 72907250 | intron (NM   | intron (NM | -4754   | NM_00130 | 11891  | Rab27a     | 2210402CC  |
| chr5  | 1.3E+08  | 1.3E+08  | intron (NM   | intron (NM | 17773   | NM_02882 | 74222  | 14-Sep     | 1700016K1  |
| chr1  | 1.07E+08 | 1.07E+08 | Intergenic   | Intergenic | 186311  | NM_17877 | 320311 | Rnf152     | A930029BC  |
| chr5  | 1.21E+08 | 1.21E+08 | intron (NM   | intron (NM | 9334    | NM_14585 | 252972 | Tpcn1      | 5730403BC  |
| chr11 | 6167852  | 6168025  | promoter-1   | promoter-1 | -206    | NM_02653 | 52513  | Ddx56      | 2600001HC  |
| chr8  | 1.29E+08 | 1.29E+08 | Intergenic   | Intergenic | 138358  | NM_02421 | 67952  | Tomm20     | 1810060KC  |
| chr2  | 68251152 | 68251225 | intron (NML4 | LINE R1    | 58850   | NM_01686 | 53416  | Stk39      | AW227544   |
| chr5  | 3802802  | 3803025  | promoter-1   | promoter-1 | 211     | NM_00128 | 70797  | Ankib1     | 2310061P2  |
| chr4  | 1.32E+08 | 1.32E+08 | intron (NM   | CpG        | 297     | NM_13388 | 100226 | Stx12      | AI850350 , |
| chr8  | 73905577 | 73905750 | 5' UTR (NM   | 5' UTR (NM | 188     | NM_01015 | 13864  | Nr2f6      | AV090102   |
| chr11 | 1.21E+08 | 1.21E+08 | exon (NM_    | exon (NM_  | 334     | NM_13905 | 104318 | Csnk1d     | 1200006AC  |
| chr10 | 55264402 | 55264675 | Intergenic   | RMER16-in  | -562185 | NM_00116 | 73390  | Msl3l2     | 1700060H1  |
| chr1  | 1.95E+08 | 1.95E+08 | intron (NM   | CpG        | 294     | NM_14541 | 215193 | Diexf      | AA408296   |
| chr15 | 84921377 | 84921450 | exon (NM_    | exon (NM_  | 40974   | NM_08047 | 140557 | Smc1b      | SMC-1B SM  |
| chr1  | 58776877 | 58777150 | intron (NM   | intron (NM | 6883    | NM_20765 | 12633  | Cflar      | 2310024N1  |
| chr7  | 31787552 | 31787650 | Intergenic   | Intergenic | 20661   | NM_00124 | 76415  | Fam187b    | 1700020BC  |
| chr8  | 1.17E+08 | 1.17E+08 | intron (NM   | intron (NM | 152399  | NM_01957 | 80707  | Wwox       | 5330426PC  |
| chr1  | 72258977 | 72259075 | promoter-1   | promoter-1 | -145    | NM_00100 | 381269 | Mreg       | Gm974 W    |
| chr8  | 1.26E+08 | 1.26E+08 | promoter-1   | promoter-1 | -562    | NM_01692 | 14087  | Fanca      | AW208693   |
| chr7  | 28023727 | 28023800 | intron (NM   | intron (NM | 5731    | NM_13377 | 76889  | Adck4      | 0610012P1  |
| chr7  | 16507227 | 16507350 | intron (NM   | intron (NM | 432     | NM_00915 | 20364  | Sepw1      | selW       |
| chr12 | 1.02E+08 | 1.02E+08 | Intergenic   | Intergenic | -4100   | NM_15358 | 73086  | Rps6ka5    | 3110005L1  |
| chr4  | 1.55E+08 | 1.55E+08 | 5' UTR (NM   | 5' UTR (NM | 302     | NM_02689 | 68991  | Ssu72      | 1190002E2  |
| chr4  | 1.49E+08 | 1.49E+08 | promoter-1   | promoter-1 | 69      | NM_20768 | 16561  | Kif1b      | A530096N(  |
| chr17 | 66084652 | 66084725 | intron (NML1 | MA6 LIN    | 37404   | NM_13368 | 106572 | Rab31      | 1700093E0  |
| chr7  | 1.49E+08 | 1.49E+08 | promoter-1   | promoter-1 | 378     | NM_05308 | 64540  | Tspan4     | AI325509 , |
| chr16 | 13109952 | 13110150 | exon (NM_    | exon (NM_  | 222     | NM_01576 | 50505  | Ercc4      | AI606920 ; |
| chr8  | 74967702 | 74968025 | promoter-1   | promoter-1 | 84      | NM_02817 | 72254  | 1700030KC- |            |
| chr5  | 1.15E+08 | 1.15E+08 | promoter-1   | promoter-1 | -545    | NM_02901 | 74585  | Sppl3      | 4833416IO! |
| chr19 | 41419927 | 41420075 | intron (NM   | intron (NM | 39559   | NM_03137 | 83490  | Pik3ap1    | 1810044JO  |
| chrX  | 42268227 | 42268400 | Intergenic   | Intergenic | -124939 | NM_17873 | 245404 | Dcaf12l1   | 9330180J2! |
| chr12 | 78249177 | 78249475 | Intergenic   | MIR3 SINE  | -89765  | NM_00125 | 53618  | Fut8       | -          |
| chr8  | 1.11E+08 | 1.11E+08 | Intergenic   | Intergenic | -20756  | NM_00749 | 11906  | Zfhx3      | A230102L0  |

|       |          |          |                       |         |           |        |           |            |
|-------|----------|----------|-----------------------|---------|-----------|--------|-----------|------------|
| chr17 | 71901427 | 71901600 | intron (NM CpG        | 112     | NM_02925  | 70891  | Spdya     | 4921517J0  |
| chr11 | 29447577 | 29447775 | promoter-1promoter-1  | -274    | NM_02850  | 73324  | 1700034F0 | Clhc1      |
| chr2  | 1.65E+08 | 1.65E+08 | Intergenic MIR SINE   | -1218   | NM_01359  | 17395  | Mmp9      | AW743869   |
| chr8  | 91159852 | 91160050 | promoter-1promoter-1  | 76      | NM_02784  | 71607  | Snx20     | 9130017C1  |
| chr3  | 1.44E+08 | 1.44E+08 | promoter-1promoter-1  | 260     | NM_05310  | 93684  | 15-Sep    | 9430015PC  |
| chr8  | 1.18E+08 | 1.18E+08 | intron (NM intron (NM | 431881  | NM_00102  | 17132  | Maf       | 2810401A2  |
| chr7  | 1.34E+08 | 1.34E+08 | promoter-1promoter-1  | -227    | NM_17736  | 244216 | Zfp771    | G630024CC  |
| chr14 | 79915627 | 79915725 | intron (NM intron (NM | 195     | NM_00128  | 13709  | Elf1      | Elf-1 Sts1 |
| chr11 | 3231877  | 3232325  | intron (NM CpG-1647   | 1367    | NM_17814  | 216505 | Pik3ip1   | 1500004AC  |
| chr6  | 1.25E+08 | 1.25E+08 | intron (NM intron (NM | 567     | NM_00788  | 13498  | Atn1      | Atr1 Drpla |
| chr17 | 34136627 | 34136975 | exon (NM_ exon (NM_   | 477     | NM_00100  | 14972  | H2-K1     | H-2K H-2K  |
| chr1  | 4775552  | 4775875  | promoter-1promoter-1  | 94      | NR_03353( | 27395  | Mrpl15    | HSPC145 M  |
| chr1  | 1.81E+08 | 1.81E+08 | intron (NM intron (NM | 236695  | NM_00116  | 269152 | Kif26b    | 4832420M   |
| chr15 | 83957527 | 83957650 | Intergenic Intergenic | -3983   | NM_02942  | 75772  | Pnpla5    | 4833426H1  |
| chr18 | 23908277 | 23908425 | Intergenic Intergenic | -2483   | NM_00116  | 212307 | Mapre2    | AI314113 f |
| chr1  | 1.83E+08 | 1.83E+08 | promoter-1promoter-1  | -461    | NM_13322  | 170760 | Acbd3     | 60kDa 843  |
| chr8  | 1.04E+08 | 1.04E+08 | Intergenic RMER19C    | 1622323 | NM_00986  | 12552  | Cdh11     | Cad11      |
| chr18 | 47436477 | 47436575 | intron (NM intron (NM | 91996   | NM_01874  | 20358  | Sema6a    | 9330158E0  |
| chr15 | 76540952 | 76541175 | promoter-1promoter-1  | -74     | NM_05821  | 79456  | Recql4    | RecQ4      |
| chr12 | 31756152 | 31756250 | Intergenic Intergenic | -2632   | NM_02782  | 104943 | Fam110c   | 9030611O1  |
| chr4  | 1.37E+08 | 1.37E+08 | intron (NM intron (NM | -31178  | NM_02956  | 110351 | Rap1gap   | 13000191:  |
| chr5  | 1.4E+08  | 1.4E+08  | Intergenic ID_B1 SINI | -3028   | NM_00125  | 77053  | Sun1      | 4632417G1  |
| chr19 | 3931852  | 3931950  | Intergenic Intergenic | -2185   | NM_02631  | 67689  | Aldh3b1   | 1700001N1  |
| chr5  | 32873752 | 32873950 | Intergenic PB1D9 SIN  | -39693  | NM_00120  | 22612  | Yes1      | Yes p61-Ye |
| chr12 | 8214827  | 8215100  | promoter-1promoter-1  | 30      | NM_00116  | 68832  | 1110057KC | LDAH       |
| chr5  | 46266827 | 46267100 | Intergenic Intergenic | -18184  | NM_00116  | 209707 | Lcorl     | Mlr1       |
| chr15 | 1E+08    | 1E+08    | intron (NM intron (NM | 9544    | NM_15340  | 207785 | Csrnp2    | CSRNP-2 C  |
| chr14 | 21330477 | 21330700 | intron (NM intron (NM | -14465  | NM_02910  | 74843  | Mss51     | 4833444M   |
| chr10 | 62878502 | 62878950 | Intergenic Intergenic | -14120  | NM_17761  | 216033 | Ctnna3    | 4930429L0  |
| chr19 | 4625702  | 4625875  | promoter-1promoter-1  | -171    | NM_02313  | 19671  | Rce1      | D19Ert28:  |
| chr11 | 95651027 | 95651325 | Intergenic Intergenic | -34638  | NM_15310  | 237928 | Phospho1  | D11Moh36   |
| chr1  | 1.45E+08 | 1.45E+08 | Intergenic MER89 LTI  | -174426 | NM_02002  | 26878  | B3galt2   | -          |
| chr4  | 9038277  | 9038375  | Intergenic Intergenic | -158138 | NM_02894  | 74438  | Clvs1     | 4933402J2: |
| chr8  | 11403777 | 11404150 | intron (NM intron (NM | 74536   | NM_01122  | 19332  | Rab20     | AA536966   |
| chr19 | 3334127  | 3334250  | intron (NM intron (NM | 10887   | NM_01349  | 12894  | Cpt1a     | C730027GC  |
| chr14 | 28164602 | 28164700 | intron (NM intron (NM | -9924   | NM_00128  | 71704  | Arhgef3   | 1200004I2: |
| chr9  | 60592202 | 60592425 | Intergenic RCHARR1    | 31385   | NM_02623  | 67557  | Larp6     | 5430431GC  |
| chr14 | 60378627 | 60378825 | intron (NM intron (NM | 134608  | NM_14546  | 219134 | Shisa2    | 9430059P2  |
| chr9  | 62981477 | 62981850 | Intergenic Intergenic | 13124   | NM_17244  | 207667 | Skor1     | AV273001   |
| chr5  | 1.47E+08 | 1.47E+08 | Intergenic L1MB3 LIN  | -91436  | NM_00101  | 14738  | Gpr12     | Gpcr01 Gp  |
| chr13 | 64376327 | 64376625 | promoter-1promoter-1  | -180    | NM_17258  | 218294 | Cdc14b    | 2810432N1  |
| chr11 | 83755577 | 83755800 | promoter-1promoter-1  | 96      | NM_03009  | 78394  | Ddx52     | 2700029CC  |
| chr7  | 16931402 | 16931550 | intron (NM intron (NM | 36544   | NM_13323  | 170770 | Bbc3      | PUMA PUI   |
| chr2  | 24774352 | 24774450 | intron (NM CpG        | 728     | NM_17254  | 77683  | Ehmt1     | 9230102N1  |
| chr5  | 1.23E+08 | 1.23E+08 | Intergenic Intergenic | -7817   | NM_18330  | 330188 | Ccdc63    | 4921511C1  |
| chr2  | 1.57E+08 | 1.57E+08 | intron (NM intron (NM | -30315  | NM_02585  | 66934  | Dsn1      | 1700022L0  |
| chr2  | 1.64E+08 | 1.64E+08 | intron (NM intron (NM | 14130   | NM_01875  | 54401  | Ywhab     | 1300003C1  |

|       |          |          |            |             |         |          |        |          |            |
|-------|----------|----------|------------|-------------|---------|----------|--------|----------|------------|
| chr12 | 80714877 | 80715025 | intron (NM | intron (NM  | 316613  | NM_00125 | 19363  | Rad51b   | AI553500 I |
| chr15 | 74551927 | 74552100 | exon (NM_  | exon (NM_   | 349     | NM_19860 | 223626 | Them6    | 4930572JO. |
| chr4  | 65592027 | 65592250 | intron (NM | intron (NM  | 326118  | NM_00116 | 69807  | Trim32   | 1810045E1  |
| chr5  | 76611377 | 76611750 | Intergenic | Intergenic  | -1342   | NM_01162 | 21982  | Tmem165  | AV026557   |
| chr13 | 1.01E+08 | 1.01E+08 | promoter-1 | promoter-1  | -97     | NM_00128 | 19356  | Rad17    | MmRad24    |
| chr5  | 1.37E+08 | 1.37E+08 | intron (NM | L1MA5 LIN   | 49176   | NM_02447 | 140709 | Col26a1  | 9430032K2  |
| chr13 | 43621027 | 43621350 | Intergenic | Intergenic  | 34372   | NM_00108 | 76137  | Mcur1    | 6230416AC  |
| chr4  | 1.36E+08 | 1.36E+08 | intron (NM | CpG         | 731     | NM_00127 | 74326  | Hnrnpr   | 2610003JO. |
| chr5  | 1.36E+08 | 1.36E+08 | promoter-1 | promoter-1  | -918    | NM_01376 | 27368  | Tbl2     | C76179 W   |
| chr19 | 45738702 | 45738800 | Intergenic | Intergenic  | -4068   | NM_01390 | 30838  | Fbxw4    | Dac Fbw4   |
| chr2  | 1.18E+08 | 1.18E+08 | Intergenic | Intergenic  | -115032 | NM_01158 | 21825  | Thbs1    | TSP-1 TSP1 |
| chr11 | 1.2E+08  | 1.2E+08  | promoter-1 | promoter-1  | 653     | NM_01156 | 21681  | Alyref   | ALY REF1   |
| chrX  | 35805452 | 35805650 | intron (NM | intron (NM  | 4086    | NM_01068 | 16784  | Lamp2    | CD107b LC  |
| chr16 | 22144702 | 22144775 | intron (NM | intron (NM  | 18634   | NM_18302 | 319765 | Igf2bp2  | C330012HC  |
| chr17 | 57171327 | 57171575 | promoter-1 | promoter-1  | -521    | NM_01061 | 16549  | Khsrp    | 6330409F2  |
| chr5  | 1.46E+08 | 1.46E+08 | promoter-1 | promoter-1  | -185    | NM_00108 | 100683 | Trrap    | AI481500   |
| chr15 | 88692802 | 88693175 | 5' UTR (NV | 5' UTR (NV  | 364     | NM_14547 | 223775 | Pim3     | BC026639   |
| chrX  | 83021152 | 83021850 | intron (NM | intron (NM  | 657     | NM_00129 | 14933  | Gyk      | D930012N:  |
| chr6  | 1.43E+08 | 1.43E+08 | intron (NM | intron (NM  | 27421   | NM_00128 | 74741  | C2cd5    | 5730419IO! |
| chr1  | 1.68E+08 | 1.68E+08 | Intergenic | Intergenic  | -8291   | NM_00108 | 68481  | Mpzl1    | 1110007A1  |
| chr1  | 1.73E+08 | 1.73E+08 | Intergenic | Intergenic  | 58663   | NM_17706 | 320078 | Olfml2b  | 1110018NC  |
| chr9  | 7567377  | 7567675  | exon (NM_  | exon (NM_   | -3932   | NM_00103 | 234911 | Mmp27    | Gm180      |
| chr7  | 1.43E+08 | 1.43E+08 | Intergenic | MLT1H2 L    | -90501  | NM_00108 | 17345  | Mki67    | D630048A:  |
| chr19 | 53977177 | 53977475 | promoter-1 | promoter-1  | -515    | NM_00116 | 18569  | Pdcd4    | D19Ucla1   |
| chr8  | 1.13E+08 | 1.13E+08 | intron (NM | CpG         | 363     | NM_14621 | 234729 | Vac14    | AA959718   |
| chr2  | 1.57E+08 | 1.57E+08 | promoter-1 | promoter-1  | -17     | NM_00129 | 228839 | Tgif2    | 4921501K2  |
| chr17 | 46419677 | 46420000 | intron (NM | intron (NM  | 137     | NM_00125 | 74094  | Tjap1    | 0610041D1  |
| chr13 | 31573477 | 31573575 | Intergenic | Intergenic  | -76513  | NM_00823 | 15220  | Foxq1    | HFH-1 Hfh  |
| chr13 | 21641427 | 21641725 | Intergenic | Lx7 LINE L  | 6313    | NM_20757 | 404335 | Olfr1535 | MOR256-3   |
| chr1  | 64347902 | 64348225 | Intergenic | Intergenic  | -180100 | NM_03356 | 93691  | Klf7     | 9830124PC  |
| chr9  | 1.04E+08 | 1.04E+08 | intron (NM | intron (NM  | 6176    | NM_01980 | 56318  | Acpp     | 5'-NT A03C |
| chr11 | 1.16E+08 | 1.16E+08 | promoter-1 | promoter-1  | 95      | NM_02725 | 217340 | Rnf157   | 2610036E2  |
| chr11 | 66860702 | 66860950 | intron (NM | (GA)n Simj  | 5294    | NM_02551 | 66358  | Adprm    | 2310004I2: |
| chr5  | 3380527  | 3380600  | intron (NM | intron (NM  | 36251   | NM_00987 | 12571  | Cdk6     | 5830411I2C |
| chr7  | 1.51E+08 | 1.51E+08 | intron (NM | intron (NM  | 142     | NM_02368 | 79202  | Tnfrsf22 | 2810028KC  |
| chr11 | 1.14E+08 | 1.14E+08 | Intergenic | Charlie8 D  | -14484  | NM_00116 | 56699  | Cdc42ep4 | 1500041M   |
| chr1  | 1.72E+08 | 1.72E+08 | intron (NM | intron (NM  | 5208    | NM_01200 | 26904  | Sh2d1b1  | EAT-2 EAT: |
| chr4  | 1.02E+08 | 1.02E+08 | intron (NM | MER5A1 D    | 26286   | NM_00128 | 73094  | Sgip1    | 3110007PC  |
| chr6  | 50195027 | 50195250 | intron (NM | intron (NM  | 16630   | NM_01876 | 54722  | Dfna5    | 2310037DC  |
| chr18 | 32070677 | 32070800 | exon (NM_  | exon (NM_   | 819     | NM_02600 | 67158  | Sft2d3   | 2610206C2  |
| chr2  | 24832652 | 24832800 | intron (NM | intron (NM  | 1173    | NM_14625 | 241274 | Pnpla7   | BC027342   |
| chr2  | 62584352 | 62584800 | intron (NM | intron (NM  | 82192   | NM_14552 | 227960 | Gca      | 5133401E0  |
| chr4  | 53840052 | 53840200 | intron (NM | Charlie1b I | 1209    | NM_02805 | 52076  | Tmem38b  | 1600017F2  |
| chr9  | 37464577 | 37464975 | 5' UTR (NV | 5' UTR (NV  | 121     | NM_02528 | 21376  | Tbrg1    | AA408552   |
| chr1  | 74472527 | 74472625 | intron (NM | intron (NM  | 16618   | NM_00950 | 22349  | Vil1     | Vil        |
| chr4  | 98049802 | 98049900 | exon (NM_  | exon (NM_   | 105     | NM_05315 | 94043  | Tm2d1    | 2310026L1  |
| chr2  | 61221852 | 61222125 | Intergenic | Intergenic  | -194655 | NM_01152 | 21353  | Tank     | C86182 E4  |

|       |          |          |             |            |         |           |        |          |              |
|-------|----------|----------|-------------|------------|---------|-----------|--------|----------|--------------|
| chr1  | 1.73E+08 | 1.73E+08 | Intergenic  | Intergenic | 22639   | NM_00107  | 14130  | Fcgr2b   | AI528646 I   |
| chrX  | 1.06E+08 | 1.06E+08 | Intergenic  | Intergenic | -11457  | NM_00103  | 622976 | Gm6377   | EG622976     |
| chr7  | 28798977 | 28799400 | promoter-1  | promoter-1 | -54     | NM_00125  | 1E+08  | Zfp850   | C1300690     |
| chr15 | 1.01E+08 | 1.01E+08 | Intergenic  | Intergenic | -11440  | NM_02153  | 59033  | Slc4a8   | AW493845     |
| chr17 | 12556827 | 12556900 | Intergenic  | Intergenic | -14612  | NM_00887  | 18815  | Plg      | AI649309 I   |
| chr1  | 92748627 | 92748775 | Intergenic  | Intergenic | -8153   | NM_00124  | 12835  | Col6a3   | AI507288 I   |
| chr10 | 90645077 | 90645150 | Intergenic  | Intergenic | -10749  | NM_00108  | 21917  | Tmpo     | 5630400D2    |
| chr4  | 1.45E+08 | 1.45E+08 | Intergenic  | Intergenic | 67586   | NM_01130  | 20148  | Dhrs3    | Rsdr1 retS   |
| chr12 | 80107702 | 80107875 | intron (NM  | CpG        | 476     | NM_17874  | 268567 | Tmem229k | 6330442E1    |
| chr2  | 1.56E+08 | 1.56E+08 | promoter-1  | promoter-1 | -117    | NR_024487 | 56046  | Uqcc1    | 2310079L1    |
| chr4  | 98797977 | 98798225 | Intergenic  | Intergenic | -10495  | NM_02608  | 67299  | Dock7    | 3110056M     |
| chr6  | 1.25E+08 | 1.25E+08 | promoter-1  | promoter-1 | -75     | NM_01073  | 17000  | Ltbr     | AI256028 I   |
| chr2  | 59914677 | 59915300 | intron (NM  | intron (NM | 48809   | NM_00100  | 407823 | Baz2b    | 5830435C1    |
| chr11 | 69647552 | 69647700 | exon (NM_   | exon (NM_  | 725     | NM_19886  | 216856 | Nlgn2    | NL2          |
| chr1  | 87859452 | 87859550 | Intergenic  | MIR SINE   | -1871   | NM_00103  | 227326 | Gpr55    | Gm218 Lpi    |
| chr11 | 1.2E+08  | 1.2E+08  | promoter-1  | promoter-1 | -488    | NM_01103  | 18453  | P4hb     | ERp59 PDI    |
| chr5  | 1.38E+08 | 1.38E+08 | Intergenic  | Intergenic | -10594  | NM_00959  | 11423  | Ache     | -            |
| chr2  | 1.27E+08 | 1.27E+08 | intron (NM  | CpG        | 114     | NM_02996  | 77721  | Mrps5    | 16204011 I   |
| chr15 | 96682527 | 96682700 | Intergenic  | Intergenic | -152484 | NM_17512  | 67760  | Slc38a2  | 5033402L1    |
| chr15 | 92865052 | 92865150 | Intergenic  | Intergenic | 240414  | NM_00103  | 223827 | Gxy1t1   | Glt8d3 Gr    |
| chr19 | 7369652  | 7369850  | 5' UTR (NM  | 5' UTR (NM | 186     | NM_00108  | 13728  | Mark2    | EMK-1 Em     |
| chr15 | 36371052 | 36371275 | Intergenic  | Intergenic | 55383   | NM_17513  | 68839  | Ankrd46  | 1110054NC    |
| chr1  | 37925627 | 37925825 | Intergenic  | MTEa LTR   | -3325   | NM_00103  | 623661 | Lipt1    | EG623661     |
| chr3  | 85397502 | 85397575 | intron (NM  | intron (NM | 19487   | NM_14489  | 229487 | Pet112   | 9430026F0    |
| chr18 | 67934427 | 67934900 | 5' UTR (NM  | 5' UTR (NM | 133     | NM_00103  | 72124  | Seh1l    | 2610007A1    |
| chr14 | 66211252 | 66211375 | intron (NR_ | AT_rich Lo | 636     | NM_00125  | 74195  | Elp3     | 2610507P1    |
| chr2  | 1.3E+08  | 1.3E+08  | promoter-1  | promoter-1 | 270     | NM_20720  | 99045  | Mrps26   | AI648866 I   |
| chr3  | 53267602 | 53267850 | promoter-1  | promoter-1 | -13     | NM_17338  | 212127 | Proser1  | 2810046L0    |
| chr2  | 35344302 | 35344425 | Intergenic  | Intergenic | -27418  | NM_00114  | 14594  | Ggta1    | AW108479     |
| chr13 | 1.02E+08 | 1.02E+08 | Intergenic  | (GAA)n Sin | -1619   | NM_02288  | 69048  | Slc30a5  | 1810010KC    |
| chr4  | 1.55E+08 | 1.55E+08 | Intergenic  | Intergenic | -2957   | NM_00116  | 14688  | Gnb1     | AA409223     |
| chr10 | 62348927 | 62349200 | Intergenic  | Intergenic | -6301   | NM_00125  | 52463  | Tet1     | 2510010BC    |
| chr8  | 87230577 | 87230725 | 3' UTR (NM  | 3' UTR (NM | 5295    | NM_00853  | 17095  | Lyl1     | Lyl-1 bHLH   |
| chr16 | 16576827 | 16576900 | Intergenic  | RMER30 D   | -16574  | NM_13923  | 224014 | Fgd4     | 9030023J0    |
| chr12 | 86814552 | 86814725 | promoter-1  | promoter-1 | -213    | NM_01023  | 14281  | Fos      | D12Rfj1 c-   |
| chr10 | 1.11E+08 | 1.11E+08 | Intergenic  | Intergenic | 23971   | NM_00934  | 21664  | Phlda1   | DT1P1B11     |
| chr6  | 54016952 | 54017025 | intron (NM  | intron (NM | 27062   | NM_00116  | 69993  | Chn2     | 1700026N2    |
| chr15 | 79187852 | 79188250 | exon (NM_   | exon (NM_  | 9943    | NM_01075  | 17133  | Maff     | -            |
| chr3  | 1.08E+08 | 1.08E+08 | promoter-1  | promoter-1 | -281    | NM_00100  | 229715 | Amigo1   | Amigo ali2   |
| chr6  | 51479427 | 51479550 | intron (NM  | intron (NM | 5586    | NM_00112  | 71982  | Snx10    | 2410004M     |
| chr12 | 85749477 | 85749600 | promoter-1  | promoter-1 | 441     | NM_00764  | 12499  | Entpd5   | AI196558 I   |
| chr5  | 1.38E+08 | 1.38E+08 | 5' UTR (NM  | 5' UTR (NM | 356     | NM_02875  | 74097  | Pop7     | 0610037N1    |
| chr6  | 91198927 | 91199025 | intron (NM  | intron (NM | 36218   | NM_00799  | 14115  | Fbln2    | 5730577E1    |
| chr16 | 36465577 | 36465975 | Intergenic  | Intergenic | -10298  | NM_02528  | 20863  | Stfa3    | Stf3         |
| chr11 | 44169802 | 44169925 | Intergenic  | L1MB2 LIN  | -43702  | NM_00835  | 16160  | Il12b    | Il-12b Il-12 |
| chr5  | 1.3E+08  | 1.3E+08  | promoter-1  | promoter-1 | 106     | NM_00983  | 12466  | Cct6a    | CCT-zeta C   |
| chr12 | 73861577 | 73861925 | promoter-1  | promoter-1 | -447    | NM_00891  | 19042  | Ppm1a    | 2310003C2    |

|       |          |          |             |             |         |           |        |            |            |
|-------|----------|----------|-------------|-------------|---------|-----------|--------|------------|------------|
| chr17 | 23877002 | 23877075 | 5' UTR (NM  | 5' UTR (NM  | 259     | NM_02382  | 76498  | Paqr4      | 1500004C1  |
| chr1  | 60153702 | 60153875 | intron (NM  | intron (NM  | 963     | NM_02131  | 57750  | Wdr12      | 4933402C2  |
| chr16 | 22618077 | 22618325 | intron (NM  | intron (NM  | 39103   | NM_13865  | 110197 | Dgkg       | 2900055E1  |
| chr18 | 62348452 | 62348650 | Intergenic  | Intergenic  | -8916   | NM_00742  | 11555  | Adrb2      | Adrb-2 Bac |
| chr10 | 79514402 | 79514925 | intron (NR_ | intron (NR_ | -1570   | NM_00816  | 625249 | Gpx4       | GPx-4 GSH  |
| chr9  | 1.22E+08 | 1.22E+08 | Intergenic  | ORR1D2 L    | 29809   | NM_00116  | 215474 | Sec22c     | 4932412K2  |
| chr4  | 44976127 | 44976575 | Intergenic  | Intergenic  | -17932  | NM_08028  | 76238  | Grhpr      | 1110059DC  |
| chr2  | 1.68E+08 | 1.68E+08 | promoter-1  | promoter-1  | 629     | NM_00116  | 69372  | Mocs3      | 1700020H1  |
| chr13 | 52731577 | 52731725 | intron (NM  | MamRep6C    | 39400   | NM_01151  | 20963  | Syk        | Sykb       |
| chr19 | 28351277 | 28351425 | intron (NM  | intron (NM  | -265695 | NM_01126  | 19726  | Rfx3       | C230093O:  |
| chr15 | 51823127 | 51823250 | 5' UTR (NM  | 5' UTR (NM  | 118     | NM_00900  | 19357  | Rad21      | SCC1 mKIA  |
| chr6  | 1.25E+08 | 1.25E+08 | intron (NM  | intron (NM  | -3799   | NM_00941  | 21991  | Tpi1       | AI255506   |
| chr1  | 1.64E+08 | 1.64E+08 | promoter-1  | promoter-1  | -350    | NM_14487  | 71449  | Mettl13    | 5630401D2  |
| chr11 | 1.19E+08 | 1.19E+08 | intron (NM  | intron (NM  | 2738    | NM_00762  | 12418  | Cbx4       | MPc2 PC2   |
| chr12 | 82856602 | 82857000 | intron (NM  | intron (NM  | 25356   | NM_17739  | 338372 | Map3k9     | E130314H2  |
| chr4  | 1.55E+08 | 1.55E+08 | Intergenic  | CpG         | 64440   | NM_00108  | 76866  | Morn1      | 2900057D2  |
| chr13 | 32359227 | 32359425 | intron (NM  | intron (NM  | 71087   | NM_14604  | 218138 | Gmds       | BC031788   |
| chr1  | 39953377 | 39953650 | Intergenic  | Intergenic  | -4245   | NM_00125  | 26921  | Map4k4     | 9430080K1  |
| chr9  | 1.24E+08 | 1.24E+08 | intron (NM  | CpG         | 412     | NM_13914  | 102680 | Slc6a20a   | A730081N:  |
| chr5  | 1.18E+08 | 1.18E+08 | intron (NM  | intron (NM  | 279     | NM_18330  | 330177 | Taok3      | 2900006AC  |
| chr1  | 1.73E+08 | 1.73E+08 | Intergenic  | tRNA-Val-C  | -10166  | NM_00108  | 75472  | 1700009P1  | AV282292   |
| chr3  | 1.57E+08 | 1.57E+08 | intron (NM  | intron (NM  | 9845    | NM_01119  | 19218  | Ptger3     | EP3 Pgereg |
| chr2  | 34228452 | 34228700 | Intergenic  | CpG         | -1011   | NM_01676  | 18516  | Pbx3       | -          |
| chr4  | 6381077  | 6381250  | exon (NM_   | exon (NM_   | 255     | NM_01094  | 18201  | Nsmaf      | AA959567   |
| chr14 | 31682552 | 31682625 | intron (NM  | intron (NM  | -9855   | NM_18139  | 66175  | Mustn1     | 1110028GC  |
| chr18 | 35020827 | 35021025 | promoter-1  | promoter-1  | 65      | NM_00791  | 13653  | Egr1       | A530045N:  |
| chr15 | 88958877 | 88958950 | non-coding  | non-coding  | 217     | NR_028448 | 170787 | Hdac10     | AW548891   |
| chr14 | 31425652 | 31425775 | intron (NM  | intron (NM  | 13681   | NM_01110  | 18753  | Prkcd      | AI385711   |
| chr11 | 1.02E+08 | 1.02E+08 | intron (NM  | intron (NM  | 432     | NM_17294  | 268490 | Lsm12      | 1110032E1  |
| chr7  | 1.28E+08 | 1.28E+08 | intron (NM  | intron (NM  | 21428   | NM_02895  | 74466  | 4933427G1- |            |
| chr4  | 44769502 | 44769650 | intron (NM  | CpG         | 145     | NM_13859  | 319885 | Zcchc7     | 493057210: |
| chr11 | 1.18E+08 | 1.18E+08 | 5' UTR (NM  | 5' UTR (NM  | 220     | NM_00103  | 72344  | Usp36      | 2700002L0  |
| chr2  | 62502452 | 62502575 | exon (NM_   | exon (NM_   | 129     | NM_14552  | 227960 | Gca        | 5133401E0  |
| chr17 | 15637052 | 15637225 | intron (NM  | CpG         | 286     | NM_01368  | 21374  | Tbp        | GTF2D1 Gi  |
| chr10 | 98360677 | 98361175 | Intergenic  | Intergenic  | -16860  | NM_02648  | 67972  | Atp2b1     | 2810442I2: |
| chr1  | 1.33E+08 | 1.33E+08 | intron (NM  | intron (NM  | 2739    | NM_01977  | 56489  | Ikbke      | AW558201   |
| chr1  | 88255027 | 88255100 | intron (NM  | (A)n Simpl  | 967     | NM_01088  | 17975  | Ncl        | B530004O:  |
| chr13 | 93962377 | 93962825 | promoter-1  | promoter-1  | -363    | NM_13390  | 100715 | Papd4      | 8030446C2  |
| chr3  | 27169202 | 27169600 | Intergenic  | Intergenic  | -46598  | NM_00942  | 22035  | Tnfsf10    | A330042I2  |
| chr5  | 97378952 | 97379225 | Intergenic  | Intergenic  | -47620  | NM_08070  | 140780 | Bmp2k      | 4933417M   |
| chr10 | 7445777  | 7446000  | promoter-1  | promoter-1  | 90      | NM_01183  | 23924  | Katna1     | -          |
| chr12 | 70992752 | 70992850 | intron (NM  | intron (NM  | -1291   | NM_17862  | 73991  | Atl1       | 4930435M   |
| chr3  | 1.03E+08 | 1.03E+08 | intron (NM  | CpG         | 394     | NM_14490  | 229663 | Csde1      | AA960392   |
| chr18 | 34918427 | 34918725 | promoter-1  | promoter-1  | 16      | NM_17510  | 66306  | Fam53c     | 2810012GC  |
| chr2  | 34581352 | 34581450 | intron (NM  | AT_rich Lo  | 29351   | NM_02570  | 66691  | Gapvd1     | 2010005BC  |
| chr11 | 98803202 | 98803550 | intron (NM  | intron (NM  | 2351    | NM_00117  | 19401  | Rara       | Nr1b1 RAF  |
| chr14 | 26295777 | 26295950 | intron (NM  | intron (NM  | 17192   | NM_18320  | 328365 | Zmiz1      | BC065120   |



|       |          |          |             |             |         |          |        |           |            |
|-------|----------|----------|-------------|-------------|---------|----------|--------|-----------|------------|
| chr7  | 52823102 | 52823300 | TTS (NM_0   | TTS (NM_0   | -2322   | NM_00973 | 12036  | Bcat2     | Bcat-2 Eca |
| chr16 | 10838827 | 10838950 | intron (NM  | intron (NM  | 3736    | NM_00116 | 223970 | Rmi2      | A630055G   |
| chr1  | 1.88E+08 | 1.88E+08 | Intergenic  | Intergenic  | 126558  | NM_00936 | 21808  | Tgfb2     | BB105277   |
| chr7  | 26157452 | 26157800 | Intergenic  | Intergenic  | -2883   | NM_02821 | 72383  | Cfn       | 2210418J0  |
| chr15 | 99870002 | 99870075 | intron (NM  | intron (NM  | 943     | NM_00115 | 239667 | Dip2b     | 4932422C2  |
| chr12 | 91963152 | 91963350 | 3' UTR (NM  | 3' UTR (NM  | 13627   | NM_01005 | 13371  | Dio2      | 5DII AI324 |
| chr13 | 41582677 | 41582800 | promoter-1  | promoter-1  | -9      | NM_00111 | 18003  | Nedd9     | Cas-L CasL |
| chr2  | 1.8E+08  | 1.8E+08  | promoter-1  | promoter-1  | -681    | NM_17555 | 23856  | Dido1     | 6720461J1  |
| chr8  | 24319077 | 24319175 | promoter-1  | promoter-1  | -201    | NM_01874 | 102247 | Agpat6    | AU041707   |
| chr18 | 67439577 | 67439675 | Intergenic  | Intergenic  | -9251   | NM_05326 | 114663 | Impa2     | 2210415D2  |
| chr5  | 6949577  | 6949675  | intron (NM  | intron (NM  | -354538 | NM_02760 | 70920  | 4921511HC | -          |
| chr3  | 1.06E+08 | 1.06E+08 | intron (NM  | CpG         | 386     | NM_14554 | 109905 | Rap1a     | AI848598   |
| chr12 | 1.14E+08 | 1.14E+08 | promoter-1  | promoter-1  | -506    | NM_00129 | 217893 | Pacs2     | 6720425G1  |
| chr3  | 40605027 | 40605275 | intron (NR_ | intron (NR_ | 1278    | NR_04557 | 20873  | Plk4      | 1700028H2  |
| chr8  | 74248927 | 74249075 | intron (NR_ | intron (NR_ | 579     | NR_02826 | 74015  | Fcho1     | 3322402E1  |
| chr2  | 69660502 | 69660750 | 5' UTR (NM  | 5' UTR (NM  | 199     | NM_17778 | 277396 | Klhl23    | C130068N   |
| chr9  | 52004127 | 52004200 | Intergenic  | Intergenic  | -27947  | NM_00116 | 244871 | Zc3h12c   | A230108EC  |
| chr4  | 3605552  | 3605675  | intron (NM  | CpG         | 345     | NM_01074 | 17096  | Lyn       | AA407514   |
| chr1  | 7538452  | 7538600  | Intergenic  | MIR SINE    | 459525  | NM_18302 | 319263 | Pcmt1     | 8430411F1  |
| chr11 | 62871852 | 62872225 | Intergenic  | Intergenic  | -3123   | NM_02766 | 71062  | Tekt3     | 4933407G   |
| chr10 | 82221727 | 82221925 | intron (NM  | intron (NM  | 5060    | NM_01091 | 18045  | Nfyb      | AA985999   |
| chr2  | 72085402 | 72085550 | intron (NM  | intron (NM  | -38218  | NM_02305 | 65964  | Zak       | AV006891   |
| chr5  | 1.35E+08 | 1.35E+08 | Intergenic  | MIR SINE    | -5368   | NR_10438 | 17969  | Ncf1      | NCF-47K N  |
| chr7  | 85998952 | 85999025 | Intergenic  | Intergenic  | -6891   | NM_02958 | 76375  | Det1      | 2610034H2  |
| chr13 | 18085102 | 18085350 | promoter-1  | promoter-1  | -41     | NM_02590 | 67008  | Yae1d1    | 1600012F0  |
| chr9  | 1.01E+08 | 1.01E+08 | intron (NM  | Charlie25   | 38290   | NM_17214 | 235542 | Ppp2r3a   | 3222402P1  |
| chr1  | 16028677 | 16028750 | Intergenic  | Intergenic  | 54409   | NM_00124 | 75799  | 4930444P1 | -          |
| chr7  | 3849852  | 3850075  | promoter-1  | promoter-1  | -211    | NM_00128 | 18729  | Pira6     | 12M1 Pira  |
| chr16 | 38563227 | 38563425 | intron (NM  | intron (NM  | 399     | NM_02640 | 67846  | Tmem39a   | 2610033CC  |
| chr9  | 26806902 | 26807100 | promoter-1  | promoter-1  | 133     | NM_02586 | 66948  | Acad8     | 2310016C1  |
| chr5  | 98263677 | 98264150 | Intergenic  | Intergenic  | 196068  | NM_13373 | 71914  | Antxr2    | 2310046B1  |
| chrX  | 63558527 | 63558600 | Intergenic  | Lx8 LINE L  | -343930 | NM_00116 | 245450 | Slitrk2   | A930040J0  |
| chr16 | 17233752 | 17233825 | 5' UTR (NM  | 5' UTR (NM  | 108     | NM_17892 | 58180  | Hic2      | AA409108   |
| chr11 | 75300352 | 75300425 | 5' UTR (NM  | 5' UTR (NM  | 109     | NM_13865 | 192159 | Prpf8     | AU019467   |
| chr7  | 91040752 | 91040850 | exon (NM_   | exon (NM_   | 291     | NM_02340 | 67943  | Mesdc2    | 2210015O1  |
| chr2  | 1.19E+08 | 1.19E+08 | intron (NM  | CpG         | 407     | NM_00103 | 67809  | Rmdn3     | 1200015F2  |
| chr2  | 1.53E+08 | 1.53E+08 | Intergenic  | Intergenic  | -1640   | NM_14553 | 228788 | Ccm2l     | -          |
| chr8  | 80073677 | 80073900 | intron (NM  | (CAGAGA)r   | 492     | NM_00108 | 102182 | Prmt10    | AI931714   |
| chr9  | 66582802 | 66582950 | intron (NM  | L1_Mm LII   | 21383   | NM_17839 | 76459  | Car12     | 2310047E0  |
| chr1  | 1.74E+08 | 1.74E+08 | intron (NM  | intron (NM  | 15394   | NM_17840 | 98660  | Atp1a2    | AW060654   |
| chr17 | 33774477 | 33774875 | promoter-1  | promoter-1  | -325    | NM_00100 | 378460 | Pram1     | AY665714   |
| chrX  | 71613852 | 71614125 | promoter-1  | promoter-1  | -101    | NM_14540 | 27643  | Ubl4      | DXHXS254I  |
| chr8  | 63369252 | 63369525 | intron (NM  | CpG         | 140     | NM_02829 | 72612  | 2700029M  | C230006B2  |
| chr1  | 1.73E+08 | 1.73E+08 | 5' UTR (NM  | 5' UTR (NM  | 225     | NM_02538 | 66155  | Ufc1      | 1110021HC  |
| chr19 | 53385227 | 53385375 | exon (NM_   | exon (NM_   | 305     | NM_00100 | 17859  | Mxi1      | ENSMUSG    |
| chr1  | 87587102 | 87587250 | intron (NM  | intron (NM  | 40551   | NM_01367 | 20684  | Sp100     | A430075G   |
| chr7  | 50927477 | 50927550 | intron (NM  | intron (NM  | 112     | NM_14558 | 233189 | Ctu1      | Atpbd3 BC  |

|       |          |          |                        |        |          |        |          |             |
|-------|----------|----------|------------------------|--------|----------|--------|----------|-------------|
| chr12 | 4599852  | 4600325  | intron (NM CpG         | 274    | NM_00119 | 20403  | Itsn2    | AI327390 I  |
| chr9  | 96044127 | 96044400 | intron (NM intron (NM  | 24415  | NM_17735 | 235533 | Gk5      | AV095337    |
| chr2  | 74444352 | 74444525 | Intergenic Intergenic  | -27433 | NM_02713 | 69605  | Lnp      | 23100110    |
| chr6  | 86977027 | 86977350 | intron (NM intron (NM  | -15652 | NM_01352 | 14583  | Gfpt1    | 2810423A1   |
| chr15 | 66335427 | 66335900 | Intergenic Intergenic  | -3191  | NM_01945 | 54562  | Lrrc6    | L RTP       |
| chr2  | 30142002 | 30142125 | promoter-1promoter-1   | 110    | NM_19830 | 227699 | Nup188   | BC025526    |
| chr6  | 1.23E+08 | 1.23E+08 | intron (NML1ME3A LI    | 4426   | NM_01081 | 17474  | Clec4d   | Clecsf8 Mr  |
| chr8  | 23170602 | 23170800 | promoter-1promoter-1   | -155   | NM_00751 | 11979  | Atp7b    | Atp7a WN    |
| chr11 | 1.16E+08 | 1.16E+08 | promoter-1promoter-1   | 64     | NM_01685 | 53413  | Exoc7    | Exo70 sec   |
| chr5  | 1.41E+08 | 1.41E+08 | Intergenic Intergenic  | -20225 | NM_02152 | 59031  | Chst12   | AI595374 I  |
| chr16 | 5202752  | 5202850  | intron (NR_intron (NR_ | 1304   | NM_01379 | 27426  | Nagpa    | AI596180 I  |
| chr19 | 4409027  | 4409325  | Intergenic Intergenic  | -12099 | NM_00100 | 225876 | Kdm2a    | 100043628   |
| chr11 | 1.06E+08 | 1.06E+08 | promoter-1promoter-1   | -103   | NM_01194 | 26406  | Map3k3   | AW548911    |
| chr11 | 9185802  | 9186075  | intron (NM intron (NM  | 93993  | NM_17825 | 268379 | Abca13   | 9830132L2   |
| chr9  | 1.2E+08  | 1.2E+08  | promoter-1promoter-1   | 63     | NM_02623 | 67561  | Wdr48    | 8430408H1   |
| chr14 | 51875402 | 51875575 | exon (NM_exon (NM_     | 299    | NM_05311 | 93726  | Rnase2a  | Ear11       |
| chr15 | 74761202 | 74761750 | Intergenic Intergenic  | -24005 | NM_00116 | 17069  | Ly6e     | 9804 Ly67   |
| chr6  | 40538427 | 40538550 | Intergenic Charlie8 D  | -2684  | NM_00103 | 23845  | Clec5a   | Clecsf5 Ly: |
| chr19 | 46433052 | 46433200 | intron (NM intron (NM  | 1756   | NM_02918 | 75146  | Tmem180  | 4930449AC   |
| chr19 | 23215852 | 23216175 | 5' UTR (NV 5' UTR (NV  | 297    | NM_01063 | 16601  | Klf9     | 2310051E1   |
| chr10 | 19953452 | 19953625 | intron (NM intron (NM  | 25293  | NM_00110 | 621697 | Gm6251   | EG621697    |
| chr9  | 88168227 | 88168525 | Intergenic Intergenic  | -54071 | NM_01185 | 23959  | Nt5e     | 2210401F0   |
| chr2  | 1.58E+08 | 1.58E+08 | 5' UTR (NV 5' UTR (NV  | 202    | NM_17541 | 109275 | Actr5    | AA545173    |
| chr7  | 56501077 | 56501300 | promoter-1promoter-1   | -371   | NM_17527 | 78286  | Nav2     | 5330421F0   |
| chrX  | 71004802 | 71004925 | exon (NM_exon (NM_     | 2421   | NM_01958 | 140571 | Plxnb3   | AI451018 I  |
| chr7  | 1.17E+08 | 1.17E+08 | promoter-1promoter-1   | 37     | NM_18151 | 233726 | Ipo7     | A3300550:   |
| chr13 | 41695377 | 41695725 | Intergenic Intergenic  | -6034  | NM_00116 | 621976 | Tmem170k | EG621976    |
| chr4  | 97481302 | 97481600 | intron (NM intron (NM  | 37134  | NM_01090 | 18027  | Nfia     | 1110047K1   |
| chr13 | 95055127 | 95055300 | promoter-1promoter-1   | 23     | NM_02915 | 107767 | Scamp1   | 4930505M    |
| chr1  | 1.55E+08 | 1.55E+08 | intron (NM CpG         | 427    | NM_00784 | 13211  | Dhx9     | AI326842 I  |
| chr13 | 94868152 | 94868500 | intron (NM intron (NM  | 40575  | NM_17258 | 218454 | Lhfpl2   | 6030465B1   |
| chr13 | 12501002 | 12501325 | intron (NM intron (NM  | 13521  | NM_14483 | 217995 | Heatr1   | AA517551    |
| chr1  | 58502527 | 58502675 | promoter-1promoter-1   | -271   | NM_00128 | 70225  | Ppil3    | 2310076N2   |
| chr5  | 1.41E+08 | 1.41E+08 | intron (NM intron (NM  | 1013   | NM_02152 | 59031  | Chst12   | AI595374 I  |
| chr11 | 84937077 | 84937375 | intron (NM intron (NM  | 16231  | NM_00102 | 237898 | Usp32    | 2900074J0   |
| chr19 | 32641552 | 32641825 | Intergenic Intergenic  | -28517 | NM_00120 | 23972  | Papss2   | 1810018P1   |
| chr11 | 1.14E+08 | 1.14E+08 | promoter-1promoter-1   | -772   | NM_00116 | 56699  | Cdc42ep4 | 1500041M    |
| chr1  | 90174827 | 90175175 | promoter-1promoter-1   | -847   | NM_19865 | 381280 | Hjurp    | 6430706D2   |
| chr2  | 91895552 | 91895950 | Intergenic CpG         | -31424 | NM_01195 | 26427  | Creb3l1  | Oasis       |
| chr4  | 1.09E+08 | 1.09E+08 | Intergenic Intergenic  | -8241  | NM_01387 | 29864  | Rnf11    | -           |
| chr4  | 1.33E+08 | 1.33E+08 | intron (NM intron (NM  | 44980  | NM_14615 | 230793 | Ahdc1    | D030015G:   |
| chr7  | 25251927 | 25252000 | intron (NM intron (NM  | 4444   | NM_01111 | 18793  | Plaur    | Cd87 u-PA   |
| chr16 | 11252602 | 11252675 | intron (NM (TTTC)n Si  | 1780   | NM_00113 | 14852  | Gspt1    | AI314175 ,  |
| chr1  | 1.33E+08 | 1.33E+08 | Intergenic Intergenic  | -1340  | NM_14550 | 226419 | Dyrk3    | BC006704    |
| chr4  | 1.41E+08 | 1.41E+08 | intron (NM intron (NM  | -11400 | NM_02909 | 74772  | Atp13a2  | 1110012E0   |
| chr9  | 69563877 | 69564075 | Intergenic Intergenic  | 44771  | NM_02237 | 64290  | Foxb1    | C43 Fkh5    |
| chr19 | 5727377  | 5727600  | TTS (NM_0 TTS (NM_0    | -1171  | NM_05325 | 114601 | Ehbp1l1  | G430002G:   |

|       |          |          |            |            |         |           |          |            |            |
|-------|----------|----------|------------|------------|---------|-----------|----------|------------|------------|
| chr2  | 34800602 | 34800725 | intron (NM | intron (NM | 16629   | NM_00942  | 22029    | Traf1      | 4732496E1  |
| chr2  | 1.54E+08 | 1.54E+08 | promoter-1 | promoter-1 | -529    | NM_02153  | 59038    | Pxmp4      | 3010018PC  |
| chr9  | 20296852 | 20296925 | 5' UTR (NM | 5' UTR (NM | 302     | NM_14622  | 235028   | Zfp426     | 2900057CC  |
| chr9  | 50399102 | 50399475 | Intergenic | Intergenic | 12666   | NM_02584  | 66925    | Sdhd       | 3110001M   |
| chr3  | 27117702 | 27117975 | intron (NM | intron (NM | 35912   | NM_17877  | 320024   | Nceh1      | Aadacl1 B2 |
| chr12 | 1.2E+08  | 1.2E+08  | Intergenic | Intergenic | -125989 | NM_17708  | 320145   | Sp8        | D930049B1  |
| chr10 | 1.18E+08 | 1.18E+08 | Intergenic | ORR1E LTF  | 90158   | NM_00101  | 69181    | Dyrk2      | 1810038L1  |
| chr7  | 1.06E+08 | 1.06E+08 | promoter-1 | promoter-1 | -484    | NM_17228  | 233545   | 2210018M   | 2310016L0  |
| chr13 | 33709952 | 33710425 | Intergenic | MYSERV-in  | -43086  | NM_00107  | 238568   | Serpinb6d  | Gm11390    |
| chr10 | 93710627 | 93710700 | Intergenic | MTEa LTR   | 48909   | NM_02555  | 66414    | Ndufa12    | 2410011GC  |
| chr8  | 74061477 | 74061625 | promoter-1 | promoter-1 | -215    | NM_19809  | 69550    | Bst2       | 231001511C |
| chr7  | 20092902 | 20093000 | 5' UTR (NV | 5' UTR (NV | 729     | NM_17769  | 232946   | Bloc1s3    | BC043666   |
| chr3  | 1.04E+08 | 1.04E+08 | intron (NM | intron (NM | 1170    | NM_17268  | 229675   | Rsb1       | C230004DC  |
| chr2  | 1.03E+08 | 1.03E+08 | intron (NM | intron (NM | 17121   | NM_17889  | 99382    | Abtb2      | AW539457   |
| chr3  | 97571827 | 97571925 | promoter-1 | promoter-1 | 61      | NR_11036C | 83679    | Pde4dip    | 4732458AC  |
| chr19 | 29887302 | 29887500 | promoter-1 | promoter-1 | 63      | NM_17772  | 240614   | Ranbp6     | C630001B1  |
| chr9  | 72618377 | 72618525 | Intergenic | Intergenic | -36630  | NM_17548  | 235472   | Prtg       | A230098A1  |
| chr12 | 78235452 | 78235675 | Intergenic | Intergenic | -103528 | NM_00125  | 53618    | Fut8       | -          |
| chr2  | 71995577 | 71995750 | intron (NM | intron (NM | 102989  | NM_00120  | 56508    | Rapgef4    | 1300003D1  |
| chr16 | 17147502 | 17148025 | exon (NM_  | exon (NM_  | 703     | NM_02694  | 69101    | Ydjc       | 1810015A1  |
| chr12 | 1.04E+08 | 1.04E+08 | intron (NM | intron (NM | 43832   | NM_00108  | 217843   | Unc79      | 9030205AC  |
| chr19 | 29276352 | 29276475 | Intergenic | Intergenic | -49880  | NM_00104  | 16452    | Jak2       | Fd17       |
| chr8  | 1.25E+08 | 1.25E+08 | Intergenic | Intergenic | -1040   | NM_00956  | 22761    | Zfpm1      | FOG Fog1   |
| chr11 | 1.07E+08 | 1.07E+08 | intron (NM | intron (NM | 16807   | NM_00103  | 18613    | Pecam1     | C85791 Cd  |
| chr4  | 1.35E+08 | 1.35E+08 | Intergenic | CpG        | 66624   | NM_01388  | 29876    | Clic4      | DOJmb3 TI  |
| chr5  | 1E+08    | 1E+08    | 5' UTR (NV | 5' UTR (NV | 219     | NM_00107  | 11991    | Hnrnpd     | Auf1 Hnrp  |
| chr10 | 79689677 | 79689775 | intron (NM | intron (NM | 383     | NM_02343  | 68114    | Mum1       | 2610019J0  |
| chr11 | 82606277 | 82606450 | intron (NM | intron (NM | 11752   | NM_01071  | 16882    | Lig3       | D11Wsu78   |
| chr3  | 1.04E+08 | 1.04E+08 | TTS (NM_0  | TTS (NM_0  | -1130   | NM_17268  | 229675   | Rsb1       | C230004DC  |
| chr2  | 9893552  | 9893925  | intron (NM | intron (NM | 76498   | NM_02774  | 209361   | Taf3       | 140kDa 49  |
| chr2  | 51828152 | 51828750 | 5' UTR (NV | 5' UTR (NV | 277     | NM_00114  | 64685    | Nmi        | -          |
| chr12 | 1.17E+08 | 1.17E+08 | intron (NM | CpG        | 203     | NM_01956  | 56220    | Zfp386     | Kzf1 mKIA  |
| chr12 | 82046777 | 82046975 | promoter-1 | promoter-1 | 385     | NM_00915  | 20384    | Srsf5      | Sfrs5      |
| chr13 | 19922502 | 19922600 | Intergenic | Intergenic | -6425   | NM_18175  | 353346   | Gpr141     | PGR13      |
| chr11 | 75345802 | 75345975 | 5' UTR (NV | 5' UTR (NV | 274     | NM_00119  | 215113   | Slc43a2    | 7630402D2  |
| chr5  | 1.48E+08 | 1.48E+08 | intron (NM | intron (NM | 1510    | NM_01964  | 19933    | Rpl21      | 8430440E0  |
| chr13 | 1.05E+08 | 1.05E+08 | Intergenic | Intergenic | -38235  | NM_00100  | 59079    | Erbp2ip    | 1700028E0  |
| chr1  | 1.63E+08 | 1.63E+08 | exon (NM_  | exon (NM_  | 8094    | NM_00119  | 1.01E+08 | 4930469G2- | -          |
| chr14 | 61939577 | 61939750 | Intergenic | Intergenic | 11073   | NM_17733  | 219144   | Arl11      | ARLTS1 C7  |
| chr19 | 5448602  | 5448825  | intron (NM | CpG        | 1015    | NM_01023  | 14283    | Fosl1      | AW538199   |
| chr5  | 1.06E+08 | 1.06E+08 | Intergenic | Intergenic | -3787   | NM_00112  | 231549   | Lrrc8d     | 2810473GC  |
| chr15 | 1.02E+08 | 1.02E+08 | Intergenic | Intergenic | -2856   | NM_15353  | 209039   | Tenc1      | C1-ten neq |
| chr8  | 1.27E+08 | 1.27E+08 | intron (NM | intron (NM | 32944   | NM_13927  | 108148   | Galnt2     | AI480629   |
| chr10 | 75905252 | 75905375 | exon (NM_  | exon (NM_  | 344     | NM_00878  | 18541    | Pcnt       | AW476095   |
| chr1  | 95239852 | 95240000 | promoter-1 | promoter-1 | -296    | NM_02320  | 66385    | Ppp1r7     | 2310014J0  |
| chr6  | 4923327  | 4923550  | intron (NM | intron (NM | 70118   | NM_18159  | 243725   | Ppp1r9a    | 2810430P2  |
| chr1  | 58852502 | 58852675 | intron (NM | CpG        | 370     | NM_00981  | 12370    | Casp8      | CASP-8 FLI |

|       |          |          |            |            |          |           |        |           |             |
|-------|----------|----------|------------|------------|----------|-----------|--------|-----------|-------------|
| chr6  | 66816402 | 66816500 | Intergenic | Intergenic | -29940   | NM_00117  | 14701  | Gng12     | 2010305F1   |
| chr13 | 20441627 | 20441900 | intron (NM | intron (NM | -123096  | NM_19809  | 140580 | Elmo1     | 6330578D2   |
| chr3  | 1.31E+08 | 1.31E+08 | Intergenic | URR1A DN   | -23897   | NM_02894  | 74442  | Sgms2     | 4933405A1   |
| chr11 | 4322427  | 4322500  | intron (NM | intron (NM | 18622    | NM_02945  | 75828  | Hormad2   | 4930529M    |
| chr1  | 1.37E+08 | 1.37E+08 | intron (NM | CpG        | 255      | NM_15377  | 226432 | Ipo9      | 0710008KC   |
| chr2  | 29745477 | 29745650 | promoter-1 | promoter-1 | -20      | NM_01361  | 18286  | Odf2      | AI848335 I  |
| chr12 | 33064527 | 33064775 | 3' UTR (NM | 3' UTR (NM | 997      | NM_00116  | 72123  | Ccdc71l   | 2010109K1   |
| chr6  | 73178552 | 73178625 | Intergenic | MER5A1 D   | -6963    | NM_00116  | 330355 | Dnah6     | 9830168K2   |
| chr14 | 28192827 | 28193175 | intron (NM | intron (NM | 18426    | NM_00128  | 71704  | Arhgef3   | 1200004I2   |
| chr13 | 69673877 | 69674050 | Intergenic | CpG-3986   | -1221    | NM_00116  | 210106 | Papd7     | LAK-1 POL   |
| chr1  | 66746877 | 66747125 | promoter-1 | promoter-1 | -466     | NM_02568  | 66646  | Rpe       | 2810429BC   |
| chr19 | 5572302  | 5572700  | Intergenic | Intergenic | 4427     | NM_00103  | 381201 | Ap5b1     | Gm962       |
| chr7  | 1.23E+08 | 1.23E+08 | intron (NM | intron (NM | 11997    | NM_00127  | 20679  | Sox6      | AI987981 :  |
| chr2  | 47271152 | 47271300 | Intergenic | L1_Mus2 L  | -1398403 | NM_00739  | 11480  | Acvr2a    | ActrIIa Acv |
| chr5  | 31543452 | 31543525 | intron (NM | CpG        | 197      | NM_14720  | 192292 | Nrbp1     | B230344L1   |
| chr5  | 1.04E+08 | 1.04E+08 | Intergenic | L1_Mus1 L  | -10931   | NM_00116  | 243168 | Hsd17b13  | AI047820 I  |
| chr6  | 1.16E+08 | 1.16E+08 | Intergenic | Intergenic | -7142    | NM_00966  | 11689  | Alox5     | 5-LO 5-LO)  |
| chr4  | 1.47E+08 | 1.47E+08 | promoter-1 | promoter-1 | -358     | NM_00128  | 170731 | Mfn2      | D630023P1   |
| chr8  | 81033827 | 81034000 | intron (NR | intron (NR | 686      | NM_00128  | 76775  | Slc10a7   | 2410193CC   |
| chr5  | 1.14E+08 | 1.14E+08 | intron (NM | intron (NM | 3530     | NM_02552  | 66383  | Iscu      | 2310020H2   |
| chr11 | 70467677 | 70468000 | intron (NM | CpG        | 314      | NM_01107  | 18643  | Pfn1      | Pfn         |
| chr10 | 96091502 | 96091700 | Intergenic | Intergenic | 11966    | NM_00756  | 12226  | Btg1      | AI426953 ,  |
| chr15 | 78939502 | 78939775 | 5' UTR (NM | 5' UTR (NM | 225      | NM_17746  | 27008  | Micall1   | 260 AI448:  |
| chr19 | 7568602  | 7569275  | promoter-1 | promoter-1 | 10       | NM_14609  | 109168 | AtI3      | 4633402CC   |
| chr19 | 42232377 | 42232500 | Intergenic | Intergenic | 10559    | NM_18319  | 277010 | Marveld1  | AI504298 I  |
| chr3  | 66783777 | 66783850 | intron (NM | intron (NM | 1880     | NM_01366  | 20429  | Shox2     | 6330543G1   |
| chr9  | 1.24E+08 | 1.24E+08 | intron (NM | intron (NM | 3762     | NM_00991  | 12768  | Ccr1      | Cmkbr1 M    |
| chr3  | 1.29E+08 | 1.29E+08 | Intergenic | Intergenic | -38358   | NM_00128  | 18741  | Pitx2     | 9430085M    |
| chr5  | 1.36E+08 | 1.36E+08 | promoter-1 | promoter-1 | 90       | NM_14893  | 107939 | Pom121    | 2610027A1   |
| chr17 | 37146527 | 37146675 | exon (NM   | exon (NM   | 5990     | NR_03313: | 22715  | Zfp57     | G19 Zfp-57  |
| chr11 | 76308477 | 76308625 | intron (NM | CpG        | 14370    | NM_19801  | 109934 | Abr       | -           |
| chr2  | 1.32E+08 | 1.32E+08 | intron (NM | intron (NM | 3267     | NM_13865  | 110911 | Cds2      | 5730450NC   |
| chr10 | 1.27E+08 | 1.27E+08 | promoter-1 | promoter-1 | -504     | NM_00928  | 20852  | Stat6     | -           |
| chr7  | 1.18E+08 | 1.18E+08 | intron (NM | intron (NM | 519      | NM_02599  | 67150  | Rnf141    | 2610110L0   |
| chr3  | 90490652 | 90491175 | Intergenic | Intergenic | 8730     | NM_00128  | 20202  | S100a9    | 60B8Ag A\   |
| chr13 | 41344677 | 41345425 | promoter-1 | promoter-1 | -162     | NM_00113  | 108934 | Smim13    | 2900036KC   |
| chr12 | 85290952 | 85291050 | promoter-1 | promoter-1 | -557     | NM_02363  | 71952  | 24100160C | MAPJD NC    |
| chr11 | 95194627 | 95194750 | Intergenic | Intergenic | -3644    | NM_17254  | 215512 | Fam117a   | 5730593F1   |
| chr19 | 21106377 | 21106500 | Intergenic | Intergenic | -77746   | NM_02895  | 13409  | Tmc1      | 4933416GC   |
| chr1  | 38187677 | 38187750 | Intergenic | Intergenic | -1206    | NM_01957  | 56210  | Rev1      | 1110027I2:  |
| chr5  | 1.13E+08 | 1.13E+08 | Intergenic | Intergenic | -1738    | NM_01878  | 54723  | Tfip11    | 2810002GC   |
| chr7  | 87406277 | 87406450 | TTS (NM_1  | TTS (NM_1  | 262      | NM_03137  | 83485  | Ngrn      | AW552001    |
| chr10 | 87137877 | 87138075 | Intergenic | Intergenic | 153436   | NM_00877  | 18478  | Pah       | AW106920    |
| chr9  | 86249477 | 86249725 | intron (NM | URR1B DN   | 108922   | NM_02739  | 70348  | Ube2cbp   | 2610018I0:  |
| chr4  | 1.26E+08 | 1.26E+08 | TTS (NM_0  | TTS (NM_0  | 321      | NM_13388  | 100206 | Adprhl2   | AI836109 ,  |
| chr4  | 1.32E+08 | 1.32E+08 | intron (NM | intron (NM | 13913    | NM_02027  | 56809  | Gmeb1     | 1110050AC   |
| chr6  | 29417652 | 29418075 | promoter-1 | promoter-1 | 80       | NM_02538  | 66144  | Atp6v1f   | 1110004G1   |

|       |          |          |            |            |         |          |        |          |            |
|-------|----------|----------|------------|------------|---------|----------|--------|----------|------------|
| chr9  | 1.1E+08  | 1.1E+08  | promoter-1 | promoter-1 | -56     | NM_00125 | 72831  | Dhx30    | 2810477HC  |
| chrX  | 1.39E+08 | 1.39E+08 | Intergenic | L2 LINE L2 | -7242   | NM_01949 | 56068  | Ammecr1  | 6230420G1  |
| chr14 | 21526977 | 21527225 | exon (NM_  | exon (NM_  | 327     | NM_00125 | 268721 | Zswim8   | 2310021P1  |
| chr5  | 88994527 | 88994725 | intron (NM | CpG        | 561     | NM_00128 | 52822  | Rufy3    | 2810428M   |
| chr3  | 1.2E+08  | 1.2E+08  | Intergenic | Intergenic | -236782 | NM_01955 | 56195  | Ptbp2    | Ptb2 brPTI |
| chr2  | 1.57E+08 | 1.57E+08 | intron (NM | CpG        | 146     | NM_02696 | 69161  | Manbal   | 1810024K1  |
| chr3  | 33699077 | 33699175 | promoter-1 | promoter-1 | 21      | NM_02597 | 67120  | Ttc14    | 2700016E0  |
| chr3  | 68421727 | 68421925 | intron (NM | intron (NM | 45536   | NM_01392 | 30953  | Schip1   | Nf2ip Schi |
| chr5  | 73298752 | 73298925 | Intergenic | Intergenic | -6763   | NM_00111 | 75991  | Slain2   | 5033405K1  |
| chr8  | 1.16E+08 | 1.16E+08 | promoter-1 | promoter-1 | 27      | NM_17301 | 270096 | Mon1b    | 5031407H1  |
| chr1  | 1.63E+08 | 1.63E+08 | promoter-1 | promoter-1 | -379    | NM_00745 | 11758  | Prdx6    | 1-cysPrx 9 |
| chr6  | 1.35E+08 | 1.35E+08 | Intergenic | Intergenic | -3880   | NM_00104 | 70686  | Dusp16   | 3830417M   |
| chr6  | 1.15E+08 | 1.15E+08 | intron (NM | intron (NM | 46644   | NM_17768 | 232334 | Vgll4    | BC048841   |
| chr1  | 1.69E+08 | 1.69E+08 | promoter-1 | promoter-1 | 12      | NM_00103 | 68944  | Tmco1    | 1190006AC  |
| chr15 | 59288202 | 59288350 | intron (NM | intron (NM | 82523   | NM_00116 | 68501  | Nsmce2   | 1110014D1  |
| chr8  | 88366102 | 88366375 | intron (NM | intron (NM | 1337    | NM_19944 | 102093 | Phkb     | AI463271   |
| chr10 | 35764277 | 35764375 | Intergenic | RLTR13D2   | -462287 | NM_00125 | 319415 | Hs3st5   | D930005LC  |
| chr6  | 86387877 | 86387975 | promoter-1 | promoter-1 | -466    | NM_14617 | 232196 | C87436   | -          |
| chr2  | 38859077 | 38859275 | intron (NM | intron (NM | 1475    | NM_02559 | 66489  | Rpl35    | 2410039E0  |
| chr11 | 16908602 | 16908750 | promoter-1 | promoter-1 | 45      | NM_01954 | 56193  | Plek     | 2010300B1  |
| chr7  | 20269152 | 20269325 | Intergenic | L1MB4 LIN  | -2429   | NM_00738 | 11425  | Apoc4    | Acl        |
| chr7  | 25084327 | 25084525 | 5' UTR (NV | 5' UTR (NV | 142     | NM_00956 | 22719  | Zfp61    | -          |
| chr19 | 55324952 | 55325075 | Intergenic | Intergenic | -2846   | NM_02797 | 433256 | AcsI5    | 1700030F0  |
| chr5  | 91218277 | 91218550 | Intergenic | Intergenic | 3286    | NM_20332 | 330122 | Cxcl3    | Dcip1 Gm1  |
| chr15 | 33013202 | 33013350 | intron (NM | intron (NM | 392     | NM_17607 | 54381  | Cpq      | 1190003P1  |
| chr9  | 44302952 | 44303125 | Intergenic | Intergenic | -4181   | NM_03025 | 80288  | Bcl9l    | B9L BC003  |
| chrX  | 11582652 | 11582725 | Intergenic | Intergenic | 74991   | NM_17504 | 71458  | Bcor     | 5830466J1  |
| chr10 | 1.26E+08 | 1.26E+08 | Intergenic | ID4_ SINE  | -4274   | NM_00115 | 68876  | Xrcc6bp1 | 1110068E0  |
| chr4  | 40672702 | 40672825 | intron (NM | intron (NM | 2800    | NM_00116 | 15502  | Dnaja1   | Hsj2 Nedd  |
| chr13 | 91947052 | 91947175 | intron (NM | CpG        | 188     | NM_14545 | 69085  | Zcchc9   | 1810019C2  |
| chr1  | 1.74E+08 | 1.74E+08 | Intergenic | Intergenic | -7910   | NM_02797 | 71870  | Ccdc19   | 1700028DC  |
| chr2  | 1.64E+08 | 1.64E+08 | Intergenic | RMER15-in  | -2159   | NM_00111 | 381404 | Pabpc1l  | 1810053BC  |
| chr8  | 35182077 | 35182150 | intron (NM | intron (NM | 4029    | NM_00112 | 234155 | Mboat4   | GOAT Gm:   |
| chr16 | 36391327 | 36391400 | Intergenic | Intergenic | 17086   | NM_00108 | 20862  | Stfa2    | Stf2       |
| chr11 | 75003927 | 75004125 | promoter-1 | promoter-1 | -41     | NM_14449 | 116905 | Dph1     | 2310011M   |
| chr16 | 76527727 | 76527975 | Intergenic | MLT1C LTF  | -154557 | NM_17344 | 268903 | Nrip1    | 6030458L2  |
| chr6  | 88116102 | 88116375 | Intergenic | Intergenic | -32420  | NM_00809 | 14461  | Gata2    | Gata-2     |
| chr10 | 12695527 | 12695625 | Intergenic | ID_B1 SINI | -11511  | NM_00116 | 74732  | Stx11    | 5830405CC  |
| chr2  | 1.29E+08 | 1.29E+08 | intron (NM | intron (NM | 962     | NM_02824 | 72477  | Tmem87b  | 2610301K1  |
| chr17 | 28020177 | 28020350 | intron (NM | intron (NM | 24406   | NM_02683 | 68776  | Taf11    | 1110038O:  |
| chr9  | 86360752 | 86361275 | intron (NM | CpG        | 252     | NM_17720 | 320615 | Dopey1   | B130005IO  |
| chr9  | 76255527 | 76255700 | Intergenic | L1MA8 LIN  | -84228  | NM_19896 | 387285 | Hcrtr2   | OX2R mO>   |
| chr2  | 1.31E+08 | 1.31E+08 | exon (NM_  | exon (NM_  | 322     | NM_00768 | 12616  | Cenpb    | -          |
| chr6  | 1.16E+08 | 1.16E+08 | intron (NM | CpG        | 137     | NM_02658 | 28006  | Fam21    | A130095HC  |
| chr7  | 1.31E+08 | 1.31E+08 | intron (NM | intron (NM | 17868   | NM_00125 | 628779 | Hs3st4   | EG628779   |
| chr1  | 88483477 | 88483825 | promoter-1 | promoter-1 | -24     | NM_17297 | 26895  | Cops7b   | D1Wsu66e   |
| chr2  | 84807602 | 84808100 | Intergenic | Intergenic | -12767  | NM_00892 | 19074  | Prg2     | MBP mMB    |

|       |          |          |             |             |         |          |        |           |            |
|-------|----------|----------|-------------|-------------|---------|----------|--------|-----------|------------|
| chr5  | 73204327 | 73204400 | intron (NM  | intron (NM  | 55324   | NM_00111 | 21682  | Tec       | -          |
| chr1  | 1.3E+08  | 1.3E+08  | Intergenic  | Intergenic  | 21775   | NM_00991 | 12767  | Cxcr4     | CD184 Cm   |
| chr10 | 19282977 | 19283100 | Intergenic  | (TAAA)n Si  | -28726  | NM_01051 | 15979  | Ifngr1    | CD119 IFN  |
| chr18 | 78034827 | 78035025 | intron (NM  | MIR SINE    | 1637    | NM_01383 | 19201  | Pstpip2   | MAYP cmc   |
| chr5  | 1.16E+08 | 1.16E+08 | promoter-1  | promoter-1  | 95      | NM_02693 | 69076  | Triap1    | 1810015M   |
| chr4  | 63214877 | 63214975 | Intergenic  | Intergenic  | -6468   | NM_14490 | 230279 | 6330416G1 | AW492431   |
| chr3  | 83930777 | 83930950 | intron (NM  | intron (NM  | 28845   | NM_02979 | 76915  | Mnd1      | 2610034E1  |
| chr4  | 20066877 | 20066975 | intron (NM  | intron (NM  | 97727   | NM_01028 | 14590  | Ggh       | gamma-GH   |
| chr19 | 46541602 | 46541750 | intron (NM  | intron (NM  | -34462  | NM_05310 | 93679  | Trim8     | AA408830   |
| chr15 | 83386552 | 83386650 | promoter-1  | promoter-1  | -460    | NM_00103 | 223722 | Mcat      | AI225907   |
| chr13 | 37553952 | 37554350 | Intergenic  | Intergenic  | 116937  | NM_01074 | 17084  | Ly86      | MD-1 MD1   |
| chr8  | 23587877 | 23588275 | promoter-1  | promoter-1  | -725    | NM_00114 | 102032 | Smim19    | AI316807   |
| chr4  | 28871577 | 28871775 | intron (NM  | intron (NM  | 131381  | NM_00112 | 13841  | Epha7     | Cek11 Ebk  |
| chr7  | 6325752  | 6325900  | intron (NM  | intron (NM  | 9811    | NM_00111 | 330463 | Zfp78     | A330079D:  |
| chr17 | 36160827 | 36161050 | intron (NR_ | intron (NR_ | -3433   | NM_00820 | 15042  | H2-T24    | H-2T24     |
| chr2  | 84808752 | 84808825 | Intergenic  | Intergenic  | -11830  | NM_00892 | 19074  | Prg2      | MBP mMB    |
| chr8  | 1.22E+08 | 1.22E+08 | Intergenic  | Intergenic  | -11424  | NM_02795 | 71839  | Osgin1    | 1700012B1  |
| chr11 | 83406852 | 83407200 | promoter-1  | promoter-1  | -437    | NM_00913 | 20305  | Ccl6      | MRP-1 Scy  |
| chr1  | 60466452 | 60466750 | 5' UTR (NV  | 5' UTR (NV  | 138     | NM_00119 | 329165 | Abi2      | 8430425M   |
| chr14 | 21866902 | 21867075 | intron (NM  | intron (NM  | 4676    | NM_01882 | 55946  | Ap3m1     | 1200013DC  |
| chr6  | 38925902 | 38926225 | intron (NM  | MARNA DI    | 57078   | NM_01153 | 21391  | Tbxas1    | CYP5 CYP5  |
| chr13 | 51496452 | 51496550 | Intergenic  | Intergenic  | -7486   | NM_01010 | 13610  | S1pr3     | AI132464   |
| chr4  | 1.15E+08 | 1.15E+08 | intron (NM  | intron (NM  | 16457   | NM_02564 | 66588  | Cmpk1     | 0610011DC  |
| chr1  | 80965877 | 80966050 | Intergenic  | MT2A LTR    | -107929 | NM_17284 | 241134 | Nyap2     | 9430031J1  |
| chr5  | 34530927 | 34531125 | promoter-1  | promoter-1  | -667    | NM_01075 | 17122  | Mxd4      | 2810410AC  |
| chr14 | 66849877 | 66850150 | intron (NM  | intron (NM  | -17624  | NM_00116 | 19229  | Ptk2b     | CADTK CAI  |
| chr3  | 1.32E+08 | 1.32E+08 | promoter-1  | promoter-1  | -120    | NM_00792 | 13722  | Aimp1     | 9830137AC  |
| chr5  | 20460252 | 20460375 | non-coding  | non-coding  | -2673   | NM_00108 | 242860 | Rsbm1l    | 8430412F0  |
| chr10 | 1.08E+08 | 1.08E+08 | Intergenic  | Intergenic  | -21905  | NM_02789 | 17931  | Ppp1r12a  | 1200015F0  |
| chr10 | 67520527 | 67520875 | Intergenic  | Charlie1 D  | 78355   | NM_00108 | 170799 | Rtkn2     | B130039D:  |
| chr8  | 1.23E+08 | 1.23E+08 | exon (NM_   | exon (NM_   | 7647    | NM_00116 | 234797 | 6430548M  | AW049007   |
| chr19 | 34344727 | 34345025 | Intergenic  | Intergenic  | -15013  | NM_00739 | 11475  | Acta2     | 0610041GC  |
| chr7  | 1.34E+08 | 1.34E+08 | promoter-1  | promoter-1  | -15     | NM_02663 | 52858  | Cdipt     | 9530042F1  |
| chr1  | 1.58E+08 | 1.58E+08 | intron (NM  | intron (NM  | 19531   | NM_01071 | 16872  | Lhx4      | A330062J1  |
| chr3  | 8619677  | 8619925  | Intergenic  | MTD LTR     | 47237   | NM_01042 | 15213  | Hey1      | AI316788 , |
| chr3  | 1.21E+08 | 1.21E+08 | Intergenic  | Intergenic  | 19070   | NM_00103 | 619318 | 4930432M  | -          |
| chr5  | 1.24E+08 | 1.24E+08 | intron (NM  | intron (NM  | 8824    | NM_00104 | 208043 | Setd1b    | AA516740   |
| chr9  | 63869602 | 63869725 | 5' UTR (NV  | 5' UTR (NV  | 203     | NM_00854 | 17130  | Smad6     | Madh6 b2   |
| chr2  | 1.67E+08 | 1.67E+08 | Intergenic  | RSINE1 SIN  | -30689  | NM_00896 | 19223  | Ptgis     | Cyp8 Cyp8  |
| chr7  | 82732502 | 82732625 | intron (NM  | intron (NM  | 132143  | NM_02933 | 75547  | Akap13    | 1700026GC  |
| chr2  | 91152327 | 91152400 | intron (NM  | intron (NM  | 47091   | NM_02385 | 77038  | Arfgap2   | 2310032E0  |
| chr2  | 1.53E+08 | 1.53E+08 | intron (NM  | intron (NM  | 17933   | NM_08046 | 140484 | Pofut1    | O-FucT-1 r |
| chr9  | 96790002 | 96790225 | promoter-1  | promoter-1  | -220    | NM_00128 | 235534 | Pxylp1    | 9430094M   |
| chr15 | 96471727 | 96471800 | 5' UTR (NV  | 5' UTR (NV  | 630     | NM_13408 | 105727 | Slc38a1   | AA408026   |
| chr11 | 79037202 | 79037350 | Intergenic  | Intergenic  | 19250   | NM_00104 | 78889  | Wsb1      | 1110056B1  |
| chr10 | 61950002 | 61950075 | promoter-1  | promoter-1  | -485    | NM_13367 | 30930  | Vps26a    | AA407240   |
| chr5  | 1.14E+08 | 1.14E+08 | intron (NM  | intron (NM  | 1223    | NM_14616 | 231633 | Tmem119   | AW208946   |

|       |          |          |            |            |        |           |          |           |            |
|-------|----------|----------|------------|------------|--------|-----------|----------|-----------|------------|
| chr11 | 57614677 | 57614825 | promoter-1 | promoter-1 | -388   | NM_00108  | 50724    | Sap30l    | 2310079P1  |
| chr1  | 10028552 | 10028675 | promoter-1 | promoter-1 | 314    | NM_02649  | 211660   | Cspp1     | 2310020J1  |
| chr4  | 1.18E+08 | 1.18E+08 | intron (NM | CpG        | 321    | NM_03361  | 114143   | Atp6v0b   | 2310024H1  |
| chr1  | 1.87E+08 | 1.87E+08 | exon (NM_  | exon (NM_  | 213    | NM_13368  | 67247    | 2-Mar     | 2810484M   |
| chr1  | 1.35E+08 | 1.35E+08 | Intergenic | Intergenic | -11080 | NM_13381  | 108954   | Ppp1r15b  | 1810033K1  |
| chr4  | 1.34E+08 | 1.34E+08 | intron (NM | intron (NM | 3968   | NM_14555  | 100017   | Ldlrap1   | AA691260   |
| chr6  | 17845677 | 17845950 | intron (NM | intron (NM | 134632 | NM_02365  | 22413    | Wnt2      | 2610510E1  |
| chr11 | 1.16E+08 | 1.16E+08 | intron (NM | GC_rich Lc | 298    | NM_00816  | 14784    | Grb2      | AA408164   |
| chr1  | 1.34E+08 | 1.34E+08 | 5' UTR (NM | 5' UTR (NM | 199    | NM_00879  | 18557    | Cdk18     | AA682070   |
| chr1  | 1.68E+08 | 1.68E+08 | intron (NM | intron (NM | 7996   | NM_00100  | 68481    | Mpzl1     | 1110007A1  |
| chr19 | 47805527 | 47805700 | promoter-1 | promoter-1 | -633   | NM_02637  | 67788    | Sfr1      | 6330577E1  |
| chr4  | 1.29E+08 | 1.29E+08 | promoter-1 | promoter-1 | 199    | NM_13415  | 107271   | Yars      | AL024047   |
| chr7  | 30769002 | 30769250 | 5' UTR (NM | 5' UTR (NM | 152    | NM_00116  | 243905   | Zfp568    | C80731 Gr  |
| chr17 | 47277427 | 47277550 | promoter-1 | promoter-1 | -403   | NM_00109  | 224829   | Trerf1    | 94300961   |
| chr1  | 1.66E+08 | 1.66E+08 | Intergenic | RMER5 LTI  | -68252 | NM_00972  | 11931    | Atp1b1    | Atp4b Atp  |
| chr2  | 1.44E+08 | 1.44E+08 | promoter-1 | promoter-1 | -17    | NM_00116  | 228714   | Csrp2bp   | 2510008M   |
| chr12 | 77470477 | 77470575 | promoter-1 | promoter-1 | 21     | NM_02835  | 109929   | Zbtb25    | 2810462M   |
| chr7  | 90816627 | 90816875 | intron (NM | MTC LTR I  | 36224  | NM_02337  | 170460   | Stard5    | 2310058G2  |
| chr11 | 79894652 | 79894850 | promoter-1 | promoter-1 | -258   | NM_01877  | 54394    | Crif3     | BB164954   |
| chr3  | 30499727 | 30499950 | Intergenic | Intergenic | -1046  | NM_02969  | 76652    | Actrt3    | 1700119I2  |
| chr1  | 52289427 | 52289500 | exon (NM_  | exon (NM_  | 613    | NM_00108  | 14660    | Gls       | 6330442B1  |
| chr2  | 1.22E+08 | 1.22E+08 | Intergenic | Intergenic | -8897  | NM_00101  | 435684   | Shf       | -          |
| chr17 | 45732577 | 45732750 | promoter-1 | promoter-1 | -142   | NM_00119  | 63959    | Slc29a1   | 1200014D2  |
| chr17 | 43710677 | 43710750 | intron (NM | intron (NM | 5313   | NM_01373  | 27226    | Pla2g7    | R75400     |
| chr11 | 1.19E+08 | 1.19E+08 | intron (NM | intron (NM | 36625  | NM_17244  | 207592   | Tbc1d16   | B930087KC  |
| chr2  | 1.74E+08 | 1.74E+08 | intron (NM | CpG        | 411    | NM_21373  | 228961   | Npepl1    | BC023239   |
| chr1  | 60072977 | 60073100 | intron (NM | intron (NM | 26893  | NM_02740  | 70375    | Ica1l     | 1700030B1  |
| chr3  | 87421027 | 87421150 | Intergenic | CpG        | -1585  | NM_00100  | 213498   | Arhgef11  | B930073M   |
| chr8  | 11089102 | 11089175 | Intergenic | Intergenic | -80708 | NM_00108  | 384783   | Irs2      | Irs-2      |
| chr2  | 1.02E+08 | 1.02E+08 | Intergenic | Intergenic | -15259 | NM_00129  | 241576   | Ldlrad3   | 6430500PC  |
| chr10 | 98360352 | 98360425 | Intergenic | Intergenic | -17398 | NM_02648  | 67972    | Atp2b1    | 2810442I2  |
| chr1  | 1.93E+08 | 1.93E+08 | promoter-1 | promoter-1 | -183   | NR_037578 | 52477    | Angel2    | 2610307I2  |
| chr3  | 69461602 | 69461775 | Intergenic | Intergenic | -58806 | NM_02002  | 26879    | B3galnt1  | B3galt3 b3 |
| chr16 | 8784802  | 8785125  | Intergenic | Intergenic | -45230 | NM_00108  | 69053    | 1810013L2 | 1110017PC  |
| chr11 | 83287002 | 83287150 | intron (NM | CpG        | 466    | NM_02742  | 70439    | Taf15     | 2610111C2  |
| chr9  | 1.22E+08 | 1.22E+08 | Intergenic | L1M2 LINE  | -45257 | NM_15354  | 215494   | Pomgnt2   | Ago61 C85  |
| chr17 | 35262177 | 35262325 | TTS (NM_0  | TTS (NM_0  | -1096  | NM_03347  | 114585   | D17H6S53f | G4 NG34    |
| chr12 | 71241877 | 71241950 | Intergenic | B1_Mm SI   | -13245 | NM_00119  | 1.01E+08 | Abhd12b   | Gm804      |
| chr2  | 14150827 | 14150975 | promoter-1 | promoter-1 | -140   | NM_00862  | 17533    | Mrc1      | AW259686   |
| chr11 | 83112102 | 83112200 | intron (NM | intron (NM | 328    | NM_13402  | 103737   | Pex12     | AI451906   |
| chr11 | 98756702 | 98756800 | intron (NM | B1F SINE , | -12452 | NM_00102  | 23834    | Cdc6      | CDC18L     |
| chr8  | 87356127 | 87356300 | promoter-1 | promoter-1 | 32     | NM_18335  | 102060   | Gadd45gip | 2310040G1  |
| chr15 | 1.01E+08 | 1.01E+08 | intron (NM | intron (NM | 8888   | NM_03361  | 109901   | Cela1     | 1810009A1  |
| chr7  | 78976952 | 78977400 | Intergenic | Intergenic | 474305 | NM_00102  | 244049   | Mctp2     | Gm489      |
| chr5  | 1.4E+08  | 1.4E+08  | intron (NM | intron (NM | 1549   | NM_17485  | 231830   | Micall2   | A930021H:  |
| chr7  | 72017502 | 72017775 | exon (NM_  | exon (NM_  | 288    | NM_02323  | 66647    | Ndn12     | 5730494G1  |
| chr7  | 20518402 | 20518575 | Intergenic | Intergenic | -11996 | NM_02751  | 52118    | Pvr       | 3830421F0  |

|       |          |          |            |            |        |           |        |             |            |
|-------|----------|----------|------------|------------|--------|-----------|--------|-------------|------------|
| chr1  | 1.54E+08 | 1.54E+08 | Intergenic | Intergenic | 98836  | NM_02567  | 66637  | Tsen15      | 5730449L1  |
| chr4  | 1.29E+08 | 1.29E+08 | intron (NM | CpG        | 784    | NM_02860  | 73680  | Zbtb8a      | 2410081M   |
| chr4  | 10802477 | 10802550 | intron (NM | intron (NM | 868    | NM_02600  | 67157  | 2610301B2   | AI428449   |
| chr8  | 1.12E+08 | 1.12E+08 | intron (NM | intron (NM | 5340   | NM_17564  | 234723 | Txn14b      | AI595343 I |
| chr2  | 1.68E+08 | 1.68E+08 | Intergenic | Intergenic | -1102  | NM_00988  | 12608  | Cebpb       | C/EBPbeta  |
| chr6  | 52176952 | 52177275 | 5' UTR (NM | 5' UTR (NM | 256    | NM_01045  | 15405  | Hoxa9       | D6a9 Hox-  |
| chr19 | 33297377 | 33297900 | intron (NM | intron (NM | 169147 | NM_00116  | 67795  | Rnls        | 6530404N2  |
| chr14 | 64478852 | 64479075 | promoter-1 | promoter-1 | -186   | NM_02822  | 72400  | Pinx1       | 221040311I |
| chr1  | 1.83E+08 | 1.83E+08 | 5' UTR (NM | 5' UTR (NM | 171    | NM_13370  | 69051  | Pycr2       | 1810018M   |
| chr14 | 75197277 | 75197400 | intron (NM | intron (NM | 65234  | NM_01690  | 13885  | Esd         | Es-10 Es10 |
| chr2  | 35835102 | 35835275 | promoter-1 | promoter-1 | -44    | NM_02977  | 74410  | Ttll11      | 4932702F0  |
| chr4  | 94223252 | 94223325 | exon (NM_  | exon (NM_  | 199    | NM_02636  | 67770  | Caap1       | 5830433M   |
| chr1  | 1.72E+08 | 1.72E+08 | Intergenic | Intergenic | -53256 | NM_00906  | 19737  | Rgs5        | 1110070AC  |
| chr3  | 87734252 | 87734425 | promoter-1 | promoter-1 | 102    | NM_17766  | 229504 | Isg20I2     | 4930429N2  |
| chr6  | 29161827 | 29162050 | intron (NM | intron (NM | 333    | NM_01182  | 23917  | Impdh1      | B930086D2  |
| chr4  | 45962227 | 45962425 | exon (NM_  | exon (NM_  | -15881 | NM_00129  | 100121 | Tdrd7       | 5730495N1  |
| chr13 | 52646827 | 52647175 | Intergenic | Intergenic | -20796 | NM_00102  | 68203  | Diras2      | 2900052J1. |
| chr10 | 1.25E+08 | 1.25E+08 | intron (NM | intron (NM | 56865  | NM_01139  | 20503  | Slc16a7     | 4921534NC  |
| chr3  | 96439752 | 96439850 | promoter-1 | promoter-1 | 31     | NM_00116  | 18632  | Pex11b      | PEX11beta  |
| chr5  | 53184402 | 53184550 | intron (NM | B2_Mm2 S   | 10170  | NM_03018  | 78796  | Zcchc4      | 4930449I2: |
| chr6  | 38775877 | 38776150 | intron (NM | intron (NM | 11297  | NM_00113  | 15258  | Hipk2       | 1110014O2  |
| chr2  | 32463302 | 32463575 | intron (NM | intron (NM | 933    | NR_110347 | 50935  | St6galnac6  | ST6GalNAc  |
| chr11 | 1.01E+08 | 1.01E+08 | promoter-1 | promoter-1 | -177   | NM_01119  | 19192  | Psme3       | AA410043   |
| chr13 | 77274952 | 77275025 | promoter-1 | promoter-1 | 191    | NM_00114  | 72371  | 2210408I2:- |            |
| chr10 | 43246702 | 43246800 | intron (NM | B1F SINE , | 14049  | NM_02641  | 67851  | 1700021F0-  |            |
| chr1  | 88255602 | 88255875 | promoter-1 | promoter-1 | 292    | NM_01088  | 17975  | Ncl         | B530004O:  |
| chr2  | 1.1E+08  | 1.1E+08  | 3' UTR (NM | 3' UTR (NM | 8216   | NM_01169  | 22343  | Lin7c       | 9130007B1  |
| chr1  | 53785277 | 53785500 | Intergenic | Intergenic | -21760 | NM_00125  | 627872 | Dnah7a      | Dnahc7 Dr  |
| chr11 | 72503602 | 72503900 | intron (NM | CpG        | 247    | NM_00967  | 11736  | Ankfy1      | Ankhnz ZF  |
| chr11 | 19819627 | 19820425 | Intergenic | CpG        | -4419  | NM_03352  | 114716 | Spred2      | C79158     |
| chr3  | 95462677 | 95462750 | promoter-1 | promoter-1 | 70     | NM_00856  | 17210  | Mcl1        | AW556805   |
| chr5  | 30481302 | 30481450 | promoter-1 | promoter-1 | 144    | NM_17887  | 97212  | Hadha       | C77020 M   |
| chr4  | 40152577 | 40152950 | 3' UTR (NM | 3' UTR (NM | 34095  | NM_17268  | 230073 | Ddx58       | 6430573D2  |
| chr2  | 57757452 | 57757750 | Intergenic | Intergenic | -92965 | NM_17285  | 241391 | Galnt5      | 4832424J2. |
| chr1  | 1.73E+08 | 1.73E+08 | promoter-1 | promoter-1 | -133   | NM_01948  | 56009  | Alyref2     | C130042O:  |
| chr6  | 50209502 | 50209775 | intron (NM | MIRb SINE  | 2130   | NM_01876  | 54722  | Dfna5       | 2310037DC  |
| chr7  | 75295202 | 75295275 | intron (NM | intron (NM | 113881 | NM_03010  | 78444  | Pgpep1l     | C330024D1  |
| chr2  | 11858152 | 11858250 | Intergenic | RMER16-in  | 158821 | NM_17726  | 320816 | Ankrd16     | 2810455F0  |
| chr5  | 54200902 | 54201000 | promoter-1 | promoter-1 | 85     | NM_14451  | 67249  | Tbc1d19     | 2810453KC  |
| chr3  | 68931277 | 68931400 | promoter-1 | promoter-1 | -324   | NM_00846  | 16649  | Kpna4       | 1110058DC  |
| chr6  | 47543402 | 47543500 | intron (NM | intron (NM | 1578   | NM_00797  | 14056  | Ezh2        | Enx-1 Enx1 |
| chr6  | 91422402 | 91422850 | intron (NM | intron (NM | 791    | NM_13392  | 72170  | Chchd4      | 2410012P2  |
| chr15 | 78640327 | 78640425 | Intergenic | Intergenic | -6904  | NM_13085  | 105844 | Card10      | AI449026 I |
| chr7  | 14798227 | 14798375 | Intergenic | Lx3C LINE  | 41918  | NM_00108  | 629219 | Sult2a6     | EG629219   |
| chr4  | 19502377 | 19502450 | exon (NM_  | exon (NM_  | 200    | NM_02547  | 66302  | Rmdn1       | Fam82b RI  |
| chr13 | 37876202 | 37876400 | Intergenic | Intergenic | -41606 | NM_02683  | 68750  | Rreb1       | 1110037NC  |
| chr13 | 10263227 | 10263425 | intron (NM | intron (NM | 96723  | NM_03326  | 12671  | Chrm3       | Chrm-3 M:  |



|       |          |          |            |            |         |          |        |          |            |
|-------|----------|----------|------------|------------|---------|----------|--------|----------|------------|
| chr18 | 53320727 | 53320800 | Intergenic | Intergenic | -15256  | NM_02638 | 67804  | Snx2     | 0610030AC  |
| chr8  | 94370702 | 94370800 | Intergenic | L1MB5 LIN  | -45198  | NM_00839 | 16373  | Irx3     | AI894186   |
| chr3  | 1.45E+08 | 1.45E+08 | promoter-1 | promoter-1 | 37      | NM_02571 | 52184  | Odf2l    | 4733401DC  |
| chr1  | 17441552 | 17441825 | Intergenic | MamRep18   | -150294 | NM_05319 | 94227  | Pi15     | P24TI P25  |
| chr3  | 94271352 | 94271425 | intron (NM | intron (NM | 6125    | NM_02550 | 66353  | Riiad1   | 2310007A1  |
| chr7  | 1.48E+08 | 1.48E+08 | promoter-1 | promoter-1 | 79      | NM_02588 | 66985  | Rassf7   | 2400009B1  |
| chr10 | 1.21E+08 | 1.21E+08 | intron (NM | intron (NM | 842     | NM_02936 | 75612  | Gns      | 2610016K1  |
| chr12 | 1.13E+08 | 1.13E+08 | promoter-1 | promoter-1 | 30      | NM_02280 | 17169  | Mark3    | 1600015GC  |
| chr17 | 57418627 | 57418775 | exon (NM_  | exon (NM_  | 178     | NM_00116 | 22324  | Vav1     | Vav vav-T  |
| chr16 | 32190127 | 32190200 | Intergenic | ID4 SINE I | 10277   | NM_00103 | 328660 | Bex6     | B020003OC  |
| chr4  | 1.41E+08 | 1.41E+08 | intron (NM | intron (NM | 1233    | NM_00101 | 68817  | Ddi2     | 1110056G1  |
| chr5  | 44614802 | 44615050 | intron (NM | intron (NM | 2919    | NM_17376 | 231225 | Tapt1    | 4932414K1  |
| chr11 | 61307552 | 61307725 | 5' UTR (NM | 5' UTR (NM | 130     | NM_00129 | 23939  | Mapk7    | BMK-1 BM   |
| chr1  | 1.58E+08 | 1.58E+08 | intron (NM | intron (NM | 15533   | NM_00923 | 20652  | Soat1    | 8430426K1  |
| chr4  | 5133077  | 5133200  | Intergenic | Intergenic | -412685 | NM_17773 | 242291 | Impad1   | 1110001C2  |
| chr7  | 82732077 | 82732150 | intron (NM | intron (NM | 131693  | NM_02933 | 75547  | Akap13   | 1700026GC  |
| chr14 | 30781202 | 30781325 | promoter-1 | promoter-1 | -303    | NM_01997 | 80795  | Selk     | 1110001CC  |
| chr9  | 82869352 | 82869600 | promoter-1 | promoter-1 | -380    | NM_00108 | 83946  | Phip     | 2810004D2  |
| chr5  | 1.18E+08 | 1.18E+08 | intron (NM | MTC LTR I  | 3527    | NM_00111 | 333050 | Ksr2     | -          |
| chr4  | 1.43E+08 | 1.43E+08 | promoter-1 | promoter-1 | -14     | NM_00125 | 110593 | Prdm2    | 4833427P1  |
| chr9  | 50425802 | 50425875 | promoter-1 | promoter-1 | -269    | NM_21244 | 270156 | AU019823 | Gm639      |
| chr9  | 95855052 | 95855550 | exon (NM_  | exon (NM_  | 122     | NM_01191 | 24127  | Xrn1     | Dhm2 exo   |
| chr4  | 52929602 | 52929875 | Intergenic | Intergenic | -5074   | NM_14683 | 258836 | Olfr272  | MOR262-7   |
| chr11 | 21138577 | 21138800 | promoter-1 | promoter-1 | -347    | NM_13906 | 245944 | Vps54    | Hcc8 Vps5  |
| chr19 | 48504977 | 48505075 | intron (NM | intron (NM | 224511  | NM_02569 | 66673  | Sorcs3   | 6330404A1  |
| chr10 | 67186552 | 67186675 | Intergenic | Intergenic | -174910 | NM_00100 | 211488 | Ado      | Gm237      |
| chr6  | 82602827 | 82602900 | promoter-1 | promoter-1 | -4      | NM_02588 | 66979  | Pole4    | 2400007PC  |
| chr12 | 73794902 | 73795125 | Intergenic | Intergenic | -29198  | NM_02552 | 66375  | Dhrs7    | 2310016E2  |
| chr1  | 79708027 | 79708500 | intron (NM | intron (NM | -39716  | NM_18302 | 252903 | Ap1s3    | 1190009B2  |
| chr3  | 1.08E+08 | 1.08E+08 | Intergenic | Intergenic | -21276  | NM_00111 | 12977  | Csf1     | C87615 Cs  |
| chr4  | 23450577 | 23450675 | Intergenic | RMER16-in  | -972983 | NM_19946 | 212377 | Mms22l   | F730047E0  |
| chr2  | 72314052 | 72314400 | promoter-1 | promoter-1 | -50     | NM_02586 | 66953  | Cdca7    | 2310021GC  |
| chr11 | 8608752  | 8609000  | Intergenic | Intergenic | -44338  | NM_00108 | 319939 | Tns3     | BC023928   |
| chr6  | 1.27E+08 | 1.27E+08 | promoter-1 | promoter-1 | 97      | NM_18140 | 101187 | Parp11   | 5330431N2  |
| chr7  | 87065552 | 87065775 | promoter-1 | promoter-1 | -137    | NM_00968 | 11778  | Ap3s2    | [s]3B      |
| chr9  | 7569827  | 7569925  | Intergenic | Intergenic | -1582   | NM_00103 | 234911 | Mmp27    | Gm180      |
| chr12 | 59830102 | 59830200 | Intergenic | Intergenic | 282853  | NM_00914 | 20334  | Sec23a   | Msec23 Se  |
| chr11 | 77893602 | 77893875 | exon (NM_  | exon (NM_  | 147     | NM_02231 | 57837  | Eral1    | 2610524PC  |
| chr2  | 72885077 | 72885375 | Intergenic | Intergenic | -66723  | NM_00101 | 20687  | Sp3      | D130027J0  |
| chr4  | 8864502  | 8864575  | Intergenic | RMER17D2   | 246985  | NM_00127 | 320790 | Chd7     | A730019I0  |
| chr5  | 1.23E+08 | 1.23E+08 | promoter-1 | promoter-1 | -100    | NM_00128 | 59008  | Anapc5   | 2510006G1  |
| chr12 | 1.14E+08 | 1.14E+08 | intron (NM | intron (NM | 9443    | NM_00742 | 11565  | Adssl1   | AI528595 , |
| chr14 | 51684627 | 51684825 | Intergenic | Intergenic | 6391    | NM_20755 | 404319 | Olfr750  | GA_x5J8B7  |
| chr11 | 22714177 | 22714275 | Intergenic | Intergenic | 45509   | NM_01688 | 53625  | B3gnt2   | AA408337   |
| chr3  | 1.46E+08 | 1.46E+08 | exon (NM_  | exon (NM_  | 136     | NM_02733 | 70285  | Rpf1     | 2210420E2  |
| chr2  | 34856177 | 34856400 | intron (NM | intron (NM | -38996  | NM_00942 | 22029  | Traf1    | 4732496E1  |
| chr18 | 61234377 | 61234450 | intron (NM | intron (NM | 29609   | NM_00880 | 18596  | Pdgrfb   | AI528809 , |

|       |          |          |                       |            |          |          |          |             |            |
|-------|----------|----------|-----------------------|------------|----------|----------|----------|-------------|------------|
| chr4  | 1.45E+08 | 1.45E+08 | promoter-1 promoter-1 | 45         | NM_00127 | 230895   | Vps13d   | -           |            |
| chr17 | 27193627 | 27193975 | promoter-1 promoter-1 | -448       | NM_08055 | 16440    | Itpr3    | Ip3r3 Itpr- |            |
| chr15 | 8461877  | 8461950  | Intergenic            | ORR1E LTF  | -67450   | NM_20123 | 71175    | Nipbl       | Idn3       |
| chr18 | 7868752  | 7868850  | promoter-1 promoter-1 | -29        | NM_00128 | 225131   | Wac      | 1110067PC   |            |
| chr15 | 5065777  | 5067500  | promoter-1 promoter-1 | 25         | NM_02606 | 67281    | Rpl37    | 3110005M    |            |
| chr8  | 1.1E+08  | 1.1E+08  | promoter-1 promoter-1 | 75         | NM_02627 | 67619    | Nob1     | 17000210!   |            |
| chr5  | 32054502 | 32054625 | intron (NM            | intron (NM | 54140    | NM_18128 | 107976   | Bre         | 6030405P1  |
| chr3  | 1.57E+08 | 1.57E+08 | promoter-1 promoter-1 | -385       | NM_01738 | 53861    | Zranb2   | AI227013 ;  |            |
| chr12 | 93017277 | 93017425 | intron (NM            | CpG        | 7525     | NM_17536 | 108800   | Ston2       | 4933401N2  |
| chr15 | 36936152 | 36936300 | intron (NM            | intron (NM | 931      | NM_02652 | 68036    | Zfp706      | 3110006PC  |
| chr10 | 1.11E+08 | 1.11E+08 | Intergenic            | PB1 SINE , | -29995   | NM_00100 | 237542   | Osbp18      | AA536976   |
| chr1  | 1.73E+08 | 1.73E+08 | TTS (NM_0             | TTS (NM_0  | 3625     | NM_00124 | 27045    | Nit1        | AI255805 I |
| chr5  | 1.26E+08 | 1.26E+08 | intron (NM            | intron (NM | 1574     | NM_01963 | 22190    | Ubc         | 2700054OC  |
| chr13 | 37734502 | 37734775 | Intergenic            | LTR16E2 L  | -183269  | NM_02683 | 68750    | Rreb1       | 1110037NC  |
| chr5  | 1.36E+08 | 1.36E+08 | promoter-1 promoter-1 | 91         | NM_17254 | 215210   | Tmem120a | 2010310DC   |            |
| chr7  | 53085977 | 53086225 | promoter-1 promoter-1 | 58         | NM_15341 | 101612   | Grwd1    | A301 AI50   |            |
| chr16 | 24393327 | 24393650 | promoter-1 promoter-1 | 52         | NM_17866 | 210126   | Lpp      | 9430020K1   |            |
| chr8  | 1.19E+08 | 1.19E+08 | intron (NM            | MIRc SINE  | 104228   | NM_02944 | 75796    | Cdyl2       | 1700029M   |
| chr9  | 44618477 | 44619050 | exon (NM_             | exon (NM_  | -7729    | NM_13895 | 192653   | Ttc36       | -          |
| chr12 | 32036302 | 32036475 | promoter-1 promoter-1 | -52        | NM_00786 | 13382    | Dld      | -           |            |
| chr6  | 17643952 | 17644050 | promoter-1 promoter-1 | 7          | NM_00128 | 64213    | St7      | 9430001HC   |            |
| chr16 | 38679277 | 38679350 | intron (NM            | intron (NM | 33835    | NM_02026 | 12549    | Arhgap31    | 5830477LO  |
| chr10 | 17333052 | 17333375 | Intergenic            | MER63B D   | -109821  | NM_01082 | 17684    | Cited2      | AI835299 I |
| chr15 | 63480052 | 63480225 | Intergenic            | Intergenic | 160156   | NM_03137 | 83492    | Gsdmc       | Gsdmc1 M   |
| chr2  | 3249502  | 3249600  | intron (NM            | CpG        | 349      | NM_00101 | 227522   | Rpp38       | C330006A1  |
| chr15 | 78135377 | 78135450 | intron (NM            | intron (NM | 738      | NM_00778 | 12984    | Csf2rb2     | AIC2A Beta |
| chr9  | 50576252 | 50576425 | promoter-1 promoter-1 | -5         | NM_19867 | 382137   | Fdxacb1  | D630004A:   |            |
| chr11 | 1.11E+08 | 1.11E+08 | Intergenic            | Intergenic | -77396   | NM_01060 | 16517    | Kcnj16      | 6430410F1  |
| chr4  | 1.55E+08 | 1.55E+08 | promoter-1 promoter-1 | 53         | NM_20767 | 56036    | Ccnl2    | 1700010AC   |            |
| chr3  | 5413327  | 5413900  | 3' UTR (NV            | 3' UTR (NV | 162635   | NM_00116 | 19302    | Pex2        | D3ErtD138, |
| chr6  | 90270152 | 90270275 | intron (NM            | intron (NM | 4966     | NM_02792 | 71797    | Chst13      | 1110067M   |
| chr1  | 1.55E+08 | 1.55E+08 | Intergenic            | Intergenic | -18510   | NM_01068 | 226519   | Lamc1       | Lamb2      |
| chr13 | 74227927 | 74228000 | Intergenic            | Intergenic | -28230   | NM_02895 | 74470    | Cep72       | 2610029E1  |
| chr10 | 1.27E+08 | 1.27E+08 | promoter-1 promoter-1 | -298       | NM_00783 | 13198    | Ddit3    | CHOP-10 C   |            |
| chr17 | 71334852 | 71335200 | intron (NM            | intron (NM | 4830     | NM_02340 | 67938    | My12b       | 1500001M   |
| chr4  | 1.2E+08  | 1.2E+08  | Intergenic            | ORR1E LTF  | -54810   | NM_19406 | 329934   | Foxo6       | -          |
| chr11 | 1.16E+08 | 1.16E+08 | exon (NM_             | exon (NM_  | 424      | NM_00100 | 70450    | Unc13d      | 2610108DC  |
| chr3  | 1.16E+08 | 1.16E+08 | intron (NM            | intron (NM | -84486   | NM_02242 | 64378    | Gpr88       | AW061286   |
| chr8  | 1.28E+08 | 1.28E+08 | intron (NM            | MLT1E1A I  | 52954    | NM_17556 | 270109   | Pcnxl2      | A830048PC  |
| chr1  | 82795477 | 82795825 | Intergenic            | Intergenic | -30620   | NM_02545 | 66261    | Tm4sf20     | 1810018LO  |
| chr11 | 1.18E+08 | 1.18E+08 | promoter-1 promoter-1 | -338       | NM_00101 | 11799    | Birc5    | AAC-11 Ap   |            |
| chr4  | 1.48E+08 | 1.48E+08 | promoter-1 promoter-1 | 72         | NM_02787 | 71707    | Ubiad1   | 1200002M    |            |
| chr2  | 1.53E+08 | 1.53E+08 | intron (NM            | intron (NM | 2156     | NM_01880 | 54711    | Plagl2      | AU018672   |
| chr4  | 1.3E+08  | 1.3E+08  | intron (NM            | intron (NM | 21934    | NM_02564 | 66585    | Snrnp40     | 0610009CC  |
| chr7  | 1.48E+08 | 1.48E+08 | intron (NM            | intron (NM | 387      | NM_00117 | 107702   | Rnh1        | AW546468   |
| chr1  | 1.3E+08  | 1.3E+08  | exon (NM_             | exon (NM_  | 318      | NM_02639 | 67812    | Ubxn4       | 1300013G1  |
| chr3  | 1.22E+08 | 1.22E+08 | promoter-1 promoter-1 | -44        | NM_15380 | 99480    | Dnrtip2  | 4930588M    |            |

|       |          |          |            |            |        |          |        |           |            |
|-------|----------|----------|------------|------------|--------|----------|--------|-----------|------------|
| chr3  | 52912602 | 52912775 | intron (NM | intron (NM | 67219  | NM_17538 | 108927 | Lhfp      | 28104890C  |
| chr9  | 21961827 | 21961975 | intron (NM | intron (NM | 611    | NM_00108 | 66268  | Pigyl     | 1810008A1  |
| chr6  | 1.38E+08 | 1.38E+08 | intron (NM | intron (NM | 1055   | NM_01994 | 56615  | Mgst1     | 1500002K1  |
| chr11 | 1.07E+08 | 1.07E+08 | 5' UTR (NM | 5' UTR (NM | 141    | NM_02548 | 66313  | Smurf2    | 2810411E2  |
| chr1  | 1.83E+08 | 1.83E+08 | Intergenic | Intergenic | 37664  | NM_13322 | 170760 | Acbd3     | 60kDa 843  |
| chr9  | 1.19E+08 | 1.19E+08 | intron (NM | intron (NM | -8927  | NM_00103 | 382113 | Slc22a14  | Gm1128     |
| chr2  | 1.18E+08 | 1.18E+08 | Intergenic | RSINE1 SIN | -23331 | NM_00927 | 20813  | Srp14     | 14kDa AW   |
| chr4  | 1.55E+08 | 1.55E+08 | promoter-1 | promoter-1 | -166   | NM_00128 | 140499 | Ube2j2    | 1200007B1  |
| chr14 | 60586752 | 60586875 | intron (NM | intron (NM | 118858 | NM_01580 | 50769  | Atp8a2    | AI415030 , |
| chr8  | 1.24E+08 | 1.24E+08 | promoter-1 | promoter-1 | 105    | NM_00103 | 407789 | BC048644  | -          |
| chr6  | 38384027 | 38384125 | 5' UTR (NM | 5' UTR (NM | 151    | NM_17718 | 320538 | Ubn2      | 2900060J0  |
| chr2  | 1.57E+08 | 1.57E+08 | intron (NM | intron (NM | 11443  | NM_02612 | 67388  | 1110008F1 | AI316789   |
| chr11 | 30854427 | 30854675 | promoter-1 | promoter-1 | 153    | NM_02390 | 65257  | Asb3      | 2400011J0  |
| chr2  | 34262577 | 34262725 | 5' UTR (NM | 5' UTR (NM | 280    | NM_00129 | 227743 | Mapkap1   | AI591529 I |
| chr4  | 41687827 | 41687975 | intron (NM | CpG-9840   | 331    | NM_00128 | 18391  | Sigmar1   | AL024364   |
| chr9  | 99082502 | 99082900 | Intergenic | Intergenic | -42071 | NM_02909 | 74769  | Pik3cb    | 1110001J0  |
| chr14 | 70977702 | 70977825 | exon (NM_  | exon (NM_  | 109    | NM_15313 | 213484 | Nudt18    | BC036718   |
| chr3  | 1.35E+08 | 1.35E+08 | promoter-1 | promoter-1 | -112   | NM_02728 | 110173 | Manba     | 24100300C  |
| chr8  | 1.29E+08 | 1.29E+08 | TTS (NM_0  | TTS (NM_0  | 15883  | NM_02421 | 67952  | Tomm20    | 1810060KC  |
| chr16 | 45030027 | 45030250 | Intergenic | Intergenic | -64028 | NM_02643 | 67896  | Ccdc80    | 2610001E1  |
| chr7  | 1.04E+08 | 1.04E+08 | intron (NM | CpG        | 177    | NM_01024 | 14389  | Gab2      | AI463667 I |
| chr8  | 1.2E+08  | 1.2E+08  | intron (NM | CpG        | 260    | NM_17228 | 234779 | Plcg2     | PLCgamma   |
| chr9  | 61795577 | 61795675 | Intergenic | Intergenic | -1020  | NM_02424 | 71819  | Kif23     | 3110001D1  |
| chr5  | 33971552 | 33971725 | intron (NM | intron (NM | 646    | NM_17839 | 74504  | Fam53a    | 2410018C1  |
| chr9  | 69136077 | 69136175 | intron (NM | intron (NM | -1522  | NM_00128 | 19883  | Rora      | 9530021D1  |
| chrX  | 46219927 | 46220075 | intron (NM | (CAGG)n S  | 10889  | NM_00108 | 209005 | Gm595     | -          |
| chr1  | 1.3E+08  | 1.3E+08  | Intergenic | Intergenic | -30208 | NM_14550 | 226414 | Dars      | 5730439G1  |
| chr2  | 1.73E+08 | 1.73E+08 | Intergenic | Intergenic | 40273  | NM_01954 | 56190  | Rbm38     | Rnpc1 Seb  |
| chr11 | 1.11E+08 | 1.11E+08 | Intergenic | Intergenic | -11702 | NM_00842 | 16518  | Kcnj2     | IRK1 Kcnf1 |
| chr11 | 97849152 | 97849300 | Intergenic | Intergenic | -1466  | NM_00116 | 72324  | Plxdc1    | 2410003I0  |
| chr11 | 68854427 | 68854575 | Intergenic | tRNA-Asp-( | -4644  | NM_01149 | 20877  | Aurkb     | AIM-1 AIRI |
| chr1  | 1.73E+08 | 1.73E+08 | Intergenic | Intergenic | -4078  | NM_02789 | 71740  | Pvrl4     | 1200017F1  |
| chr14 | 61402102 | 61402300 | Intergenic | Intergenic | -1202  | NM_02743 | 70478  | Mipep     | 5730405E0  |
| chr4  | 19496952 | 19497025 | intron (NM | CpG        | 263    | NM_02776 | 70568  | Cpne3     | 5430428M   |
| chr1  | 39535152 | 39535425 | exon (NM_  | exon (NM_  | 304    | NM_01877 | 54610  | Tbc1d8    | AD3 HBLP:  |
| chr2  | 1.04E+08 | 1.04E+08 | intron (NM | intron (NM | -1688  | NM_00114 | 16909  | Lmo2      | Rbtn-2 Rbt |
| chr10 | 80023302 | 80023575 | intron (NM | intron (NM | 867    | NM_02585 | 66932  | Rexo1     | 1700021P1  |
| chr2  | 24291477 | 24291700 | intron (NM | intron (NM | 39531  | NM_01104 | 18510  | Pax8      | Pax-8      |
| chr11 | 51577502 | 51577625 | intron (NM | intron (NM | 398    | NM_02553 | 66397  | Sar1b     | 2310075M   |
| chr12 | 8162502  | 8162575  | Intergenic | Intergenic | -52375 | NM_17240 | 68832  | 1110057KC | LDAH       |
| chr4  | 1.41E+08 | 1.41E+08 | promoter-1 | promoter-1 | -221   | NM_00103 | 69582  | Plekhm2   | 2310034J1  |
| chr14 | 79689827 | 79690125 | intron (NM | intron (NM | 11466  | NM_02542 | 66214  | Rgcc      | 1190002H2  |
| chr13 | 56237102 | 56237250 | promoter-1 | promoter-1 | -265   | NM_00115 | 26914  | H2afy     | H2AF12M    |
| chr11 | 54544477 | 54544550 | intron (NM | intron (NM | 56692  | NM_17862 | 72729  | Cdc42se2  | 2810404F1  |
| chr1  | 1.66E+08 | 1.66E+08 | Intergenic | MTEa LTR   | 7412   | NM_02727 | 69962  | Mettl18   | 2810422O2  |
| chr1  | 59294352 | 59294750 | promoter-1 | promoter-1 | -476   | NM_14610 | 74018  | Als2      | 3222402C2  |
| chr14 | 57395277 | 57395350 | intron (NM | intron (NM | 1840   | NM_02568 | 66645  | Pspc1     | 5730470CC  |

|       |          |          |            |            |         |          |        |          |            |
|-------|----------|----------|------------|------------|---------|----------|--------|----------|------------|
| chr9  | 32864752 | 32864975 | Intergenic | L1_Mur3 L  | 361236  | NM_00103 | 23871  | Ets1     | AI196000   |
| chr7  | 87679852 | 87679950 | promoter-1 | promoter-1 | -17     | NM_00755 | 12144  | Blm      | -          |
| chr10 | 1.28E+08 | 1.28E+08 | intron (NM | ID_B1 SIN  | -2207   | NM_01086 | 17904  | Myl6     | ESMLC LC1  |
| chr2  | 22923127 | 22923375 | promoter-1 | promoter-1 | -470    | NM_02879 | 74159  | Acbd5    | 1300014E1  |
| chr4  | 1.16E+08 | 1.16E+08 | intron (NM | intron (NM | 10873   | NM_00128 | 17346  | Mknk1    | 2410048M   |
| chr1  | 1.36E+08 | 1.36E+08 | exon (NM_  | exon (NM_  | 200     | NM_00104 | 57439  | Tmem183a | 1300007B1  |
| chr3  | 1.08E+08 | 1.08E+08 | promoter-1 | promoter-1 | -7      | NM_00117 | 229725 | Clcc1    | Mlcl       |
| chr19 | 41975102 | 41975250 | Intergenic | Intergenic | -4533   | NM_19944 | 107094 | Rrp12    | AA408556   |
| chr10 | 40602852 | 40603000 | promoter-1 | promoter-1 | 23      | NM_02787 | 71713  | Cdc40    | 1200003H2  |
| chr10 | 76978277 | 76978375 | intron (NM | CpG        | 232     | NM_13399 | 108707 | Fam207a  | 1810008A1  |
| chr3  | 15331552 | 15331775 | intron (NM | intron (NM | 639     | NM_00107 | 751864 | Gm9733   | -          |
| chr2  | 1.2E+08  | 1.2E+08  | intron (NM | intron (NM | 474     | NM_01372 | 29808  | Mga      | AV312082   |
| chr7  | 27610702 | 27610800 | Intergenic | RLTR45 LT  | -9607   | NM_00781 | 13087  | Cyp2a5   | CYP1IA5 Cc |
| chr9  | 61236827 | 61236900 | intron (NM | intron (NM | 16690   | NM_00108 | 21887  | Tle3     | 2610103NC  |
| chr9  | 43921302 | 43921600 | promoter-1 | promoter-1 | -317    | NM_15376 | 213211 | Rnf26    | 803045011  |
| chr11 | 77940077 | 77940350 | intron (NM | Lx8 LINE L | 32038   | NM_14543 | 216971 | Fam222b  | 963002011  |
| chr10 | 5713102  | 5713250  | intron (NM | intron (NM | 21319   | NM_00795 | 13982  | Esr1     | AA420328   |
| chr10 | 1.2E+08  | 1.2E+08  | promoter-1 | promoter-1 | -520    | NM_02867 | 73914  | Irak3    | 4833428C1  |
| chr9  | 1.03E+08 | 1.03E+08 | promoter-1 | promoter-1 | -47     | NM_13397 | 22041  | Trf      | AI266983   |
| chr14 | 26299302 | 26299450 | intron (NM | intron (NM | 20705   | NM_18320 | 328365 | Zmiz1    | BC065120   |
| chr5  | 35917827 | 35918025 | promoter-1 | promoter-1 | -207    | NM_03020 | 78890  | Trmt44   | 2310079F2  |
| chr5  | 1.44E+08 | 1.44E+08 | promoter-1 | promoter-1 | -448    | NM_02584 | 66913  | Kdelr2   | 1110007A1  |
| chr11 | 80290727 | 80290950 | 5' UTR (NV | 5' UTR (NV | 290     | NM_00987 | 12569  | Cdk5r1   | Cdk5r D11  |
| chr7  | 1.09E+08 | 1.09E+08 | intron (NM | intron (NM | 45588   | NM_00928 | 20866  | Stim1    | SIM        |
| chr17 | 57074877 | 57075300 | promoter-1 | promoter-1 | -277    | NM_02232 | 64144  | Mllt1    | AA407901   |
| chr8  | 1.23E+08 | 1.23E+08 | promoter-1 | promoter-1 | 386     | NM_01092 | 18117  | Emc8     | Cox4nb Fa  |
| chr13 | 37734252 | 37734425 | Intergenic | MER45B D   | -183569 | NM_02683 | 68750  | Rreb1    | 1110037NC  |
| chr7  | 16880402 | 16880600 | Intergenic | Intergenic | -8357   | NM_00113 | 243846 | Ccdc9    | 2600011L0  |
| chr7  | 75278752 | 75278875 | intron (NM | intron (NM | 130306  | NM_03010 | 78444  | Pgpep1l  | C330024D1  |
| chr15 | 1.02E+08 | 1.02E+08 | promoter-1 | promoter-1 | -499    | NM_14606 | 223922 | Atf7     | 1110012F1  |
| chr10 | 6280477  | 6280650  | intron (NM | intron (NM | 92903   | NM_00117 | 270685 | Mthfd1l  | 2410004L1  |
| chr4  | 1.54E+08 | 1.54E+08 | promoter-1 | promoter-1 | -476    | NM_00104 | 668173 | Pex10    | AV128229   |
| chr1  | 1.92E+08 | 1.92E+08 | exon (NM_  | exon (NM_  | 179     | NM_02679 | 226830 | Smyd2    | 1110020E0  |
| chr5  | 1.22E+08 | 1.22E+08 | Intergenic | Intergenic | -1553   | NM_00850 | 16923  | Sh2b3    | AI429800 I |
| chr11 | 1.19E+08 | 1.19E+08 | 5' UTR (NV | 5' UTR (NV | 192     | NM_02889 | 74370  | Rptor    | 4932417HC  |
| chr4  | 62185902 | 62186050 | promoter-1 | promoter-1 | 72      | NM_02149 | 59001  | Pole3    | 1810034K1  |
| chr2  | 26245002 | 26245175 | promoter-1 | promoter-1 | 220     | NM_17318 | 66865  | Pmpca    | 1200002L2  |
| chr1  | 1.95E+08 | 1.95E+08 | intron (NM | intron (NM | 9552    | NM_15313 | 215243 | Traf3ip3 | 6030423DC  |
| chr10 | 37325477 | 37325750 | Intergenic | Intergenic | -466881 | NM_00853 | 17118  | Marcks   | Macs PKCS  |
| chr13 | 59749402 | 59749850 | intron (NM | intron (NM | 27519   | NM_00103 | 105348 | Golm1    | 2310001L0  |
| chr5  | 25265827 | 25265925 | promoter-1 | promoter-1 | 32      | NM_00100 | 242894 | Actr3b   | 9630005CC  |
| chr10 | 92546327 | 92546625 | Intergenic | Intergenic | -77145  | NM_14623 | 237459 | Cdk17    | 6430598J1  |
| chr9  | 64295627 | 64295725 | intron (NM | intron (NM | 62243   | NM_00113 | 214058 | Megf11   | 2410080HC  |
| chr7  | 25630877 | 25630975 | Intergenic | B3 SINE B  | 23784   | NM_18278 | 232973 | Lypd4    | 4933400F0  |
| chr1  | 84931327 | 84931650 | 5' UTR (NV | 5' UTR (NV | 170     | NM_02792 | 71781  | Slc16a14 | 1110004H1  |
| chr11 | 89993977 | 89994200 | Intergenic | Intergenic | 102426  | NM_02643 | 67888  | Tmem100  | 1810057C1  |
| chr1  | 58052552 | 58052650 | promoter-1 | promoter-1 | -217    | NM_19900 | 68549  | Sgol2    | 1110007NC  |

|       |          |          |            |            |         |          |        |           |            |
|-------|----------|----------|------------|------------|---------|----------|--------|-----------|------------|
| chr11 | 77327152 | 77327300 | promoter-1 | promoter-1 | -451    | NM_00102 | 216964 | Trp53i13  | 2410019G   |
| chr9  | 57173902 | 57174175 | Intergenic | Intergenic | -63632  | NM_02882 | 74211  | 1700017BC | AA682102   |
| chr11 | 97605352 | 97605450 | promoter-1 | promoter-1 | 617     | NM_05405 | 108083 | Pip4k2b   | AI848124 I |
| chr2  | 1.7E+08  | 1.7E+08  | Intergenic | Intergenic | -27738  | NM_00115 | 228913 | Zfp217    | 4933431CC  |
| chr15 | 98904877 | 98905050 | promoter-1 | promoter-1 | -441    | NM_00116 | 78733  | Troap     | AW476063   |
| chr4  | 1.16E+08 | 1.16E+08 | intron (NM | CpG        | 1143    | NM_15352 | 230654 | Lrrc41    | AA409966   |
| chr2  | 1.47E+08 | 1.47E+08 | intron (NM | intron (NM | 288     | NM_00103 | 228730 | Kiz       | Gm114 Nc   |
| chr7  | 1.08E+08 | 1.08E+08 | 5' UTR (NM | 5' UTR (NM | 199     | NM_19901 | 207278 | Fchsd2    | BC034086   |
| chr1  | 1.93E+08 | 1.93E+08 | promoter-1 | promoter-1 | 88      | NM_17863 | 77065  | Ints7     | 5930412E2  |
| chr19 | 8873202  | 8873275  | promoter-1 | promoter-1 | -191    | NM_02632 | 67710  | Polr2g    | 2410046K1  |
| chr1  | 36364952 | 36365100 | intron (NM | CpG        | 448     | NM_00117 | 214855 | Arid5a    | D430024K2  |
| chr17 | 29084027 | 29084275 | Intergenic | Intergenic | -4944   | NM_15339 | 69307  | Pxt1      | 1700001G1  |
| chr14 | 32063852 | 32063975 | promoter-1 | promoter-1 | 491     | NM_02794 | 71838  | Phf7      | 1700006HC  |
| chr6  | 41152402 | 41152525 | Intergenic | Intergenic | -99808  | NM_01164 | 22074  | Try4      | 0910001B1  |
| chr1  | 1.74E+08 | 1.74E+08 | Intergenic | MIRb SINE  | -2736   | NM_01091 | 18071  | Nhlh1     | Hen1 Nscl  |
| chr8  | 37185752 | 37185950 | intron (NM | intron (NM | 27969   | NM_17291 | 244418 | D8ErtD82e | 9830148H2  |
| chr3  | 1.16E+08 | 1.16E+08 | exon (NM_  | exon (NM_  | 175     | NM_00128 | 72776  | Sass6     | 2810453L1  |
| chr1  | 75475327 | 75475775 | promoter-1 | promoter-1 | 495     | NM_00100 | 74241  | Chpf      | 1700028NC  |
| chr14 | 15535777 | 15535850 | intron (NM | CpG        | 274     | NM_00103 | 218756 | Slc4a7    | E430014N1  |
| chr6  | 64992552 | 64993200 | promoter-1 | promoter-1 | 215     | NM_00795 | 13990  | Smarcad1  | AV081750   |
| chr2  | 1.06E+08 | 1.06E+08 | promoter-1 | promoter-1 | 119     | NM_02387 | 77766  | Elp4      | A330107A1  |
| chr2  | 25463427 | 25464200 | TTS (NM_0  | TTS (NM_0  | 153     | NM_00102 | 227624 | Rabl6     | B230208H1  |
| chr12 | 1.04E+08 | 1.04E+08 | promoter-1 | promoter-1 | -285    | NM_17280 | 238386 | Btbd7     | 5730507E0  |
| chr7  | 1.29E+08 | 1.29E+08 | promoter-1 | promoter-1 | -131    | NM_00103 | 233824 | Cog7      | 5630400E2  |
| chr13 | 1.03E+08 | 1.03E+08 | intron (NM | intron (NM | 1596    | NM_00107 | 18708  | Pik3r1    | PI3K p50aI |
| chr9  | 1.08E+08 | 1.08E+08 | TTS (NM_0  | TTS (NM_0  | 1309    | NM_02659 | 68176  | Fam212a   | 6230427J0  |
| chr18 | 21160752 | 21160900 | intron (NM | CpG-6775   | 984     | NM_20762 | 56515  | Rnf138    | 2410015A1  |
| chr16 | 4420577  | 4420700  | promoter-1 | promoter-1 | -140    | NM_00962 | 11515  | Adcy9     | ACtp10 AV  |
| chr9  | 1.08E+08 | 1.08E+08 | promoter-1 | promoter-1 | 515     | NM_01680 | 11848  | Rhoa      | Arha Arha: |
| chr1  | 1.94E+08 | 1.94E+08 | intron (NM | intron (NM | 492     | NM_01163 | 22033  | Traf5     | -          |
| chr7  | 39056202 | 39056375 | promoter-1 | promoter-1 | 79      | NM_02539 | 66161  | Pop4      | 1110023P2  |
| chr8  | 82814377 | 82814500 | Intergenic | Intergenic | -203506 | NM_01036 | 14934  | Gypa      | AI853584 I |
| chr12 | 1.03E+08 | 1.03E+08 | promoter-1 | promoter-1 | -58     | NM_01685 | 51786  | Cpsf2     | 100kDa 26  |
| chr10 | 80638877 | 80640725 | intron (NM | intron (NM | 425     | NM_00790 | 13629  | Eef2      | Ef-2       |
| chr12 | 88540552 | 88540700 | promoter-1 | promoter-1 | 553     | NM_00103 | 382620 | Tmed8     | 6430595O1  |
| chr1  | 89008627 | 89008775 | Intergenic | Intergenic | -10520  | NM_00108 | 76768  | Alpi      | 2010001C1  |
| chr16 | 49839227 | 49839300 | Intergenic | Intergenic | -16504  | NM_01058 | 16423  | Cd47      | 9130415E2  |
| chr1  | 36748002 | 36748550 | promoter-1 | promoter-1 | -56     | NM_00994 | 12859  | Cox5b     | -          |
| chr9  | 1.07E+08 | 1.07E+08 | promoter-1 | promoter-1 | -526    | NM_01971 | 56289  | Rassf1    | 123F2 AA5  |
| chr9  | 64658502 | 64658600 | promoter-1 | promoter-1 | -267    | NM_00116 | 102442 | Dennd4a   | AI115600 I |
| chr1  | 92977002 | 92977125 | intron (NM | intron (NM | 27042   | NM_00851 | 16978  | Lrrfip1   | AU024550   |
| chr6  | 82889902 | 82889975 | promoter-1 | promoter-1 | -194    | NM_00111 | 20355  | Sema4f    | -          |
| chr8  | 1.25E+08 | 1.25E+08 | promoter-1 | promoter-1 | -609    | NM_01391 | 30927  | Snai3     | AI643946 I |
| chr16 | 24120902 | 24121225 | Intergenic | Charlie1b  | -132365 | NM_00974 | 12053  | Bcl6      | Bcl5       |
| chr1  | 9872052  | 9872300  | intron (NM | intron (NM | -26543  | NM_17772 | 240697 | McmDc2    | 6030422M   |
| chr17 | 50649227 | 50649350 | intron (NM | CpG        | 416     | NM_01388 | 224860 | Plcl2     | PLC-L2 PRI |
| chrX  | 12888802 | 12888925 | Intergenic | Intergenic | 30715   | NM_01002 | 13205  | Ddx3x     | D1Pas1-rs2 |

|       |          |          |             |             |         |           |        |            |            |
|-------|----------|----------|-------------|-------------|---------|-----------|--------|------------|------------|
| chr1  | 75188802 | 75188925 | promoter-1  | promoter-1  | 129     | NR_051995 | 52231  | Ankzf1     | 1300008PC  |
| chr6  | 1.09E+08 | 1.09E+08 | intron (NM  | intron (NM  | 7691    | NM_13867  | 192193 | Edem1      | A130059K2  |
| chr1  | 66885002 | 66885175 | intron (NM  | intron (NM  | -20919  | NM_00112  | 68691  | Kansl1l    | 1110028C1  |
| chr3  | 1.46E+08 | 1.46E+08 | promoter-1  | promoter-1  | 291     | NM_02761  | 70951  | Spata1     | 4921536I2  |
| chr2  | 1.81E+08 | 1.81E+08 | exon (NM_   | exon (NM_   | 240     | NM_17376  | 228994 | Ythdf1     | 2210410K2  |
| chr4  | 11486077 | 11486475 | intron (NM  | CpG         | 209     | NM_00125  | 623474 | Rad54b     | E130016E0  |
| chr5  | 64550677 | 64551100 | promoter-1  | promoter-1  | -611    | NM_01963  | 57915  | Tbc1d1     | 1110062GC  |
| chr16 | 87455027 | 87455100 | promoter-1  | promoter-1  | -167    | NM_02425  | 74112  | Usp16      | 1200004E0  |
| chr1  | 75138577 | 75138750 | promoter-1  | promoter-1  | 279     | NM_02697  | 69171  | Cnppd1     | 1810031K1  |
| chr3  | 95755152 | 95755525 | Intergenic  | Intergenic  | 22158   | NM_02321  | 66471  | Anp32e     | 2810018A1  |
| chr16 | 37769102 | 37769250 | Intergenic  | MLT1K LTF   | -7965   | NM_00804  | 14314  | Fstl1      | AI316791   |
| chr11 | 62062227 | 62062300 | promoter-1  | promoter-1  | -223    | NM_00741  | 11541  | Adora2b    | A2BAR A2I  |
| chr19 | 35290127 | 35290375 | Intergenic  | Intergenic  | 293403  | NM_18304  | 240641 | Kif20b     | 33cex B13  |
| chr6  | 1.35E+08 | 1.35E+08 | intron (NM  | intron (NM  | 1145    | NM_13044  | 70686  | Dusp16     | 3830417M   |
| chr4  | 1.33E+08 | 1.33E+08 | Intergenic  | Intergenic  | -1614   | NM_00114  | 230801 | Pigv       | B330013BC  |
| chr16 | 38648877 | 38649325 | intron (NM  | intron (NM  | 64047   | NM_02026  | 12549  | Arhgap31   | 5830477L0  |
| chr16 | 36156552 | 36156775 | promoter-1  | promoter-1  | -234    | NM_17386  | 268885 | Stfa2l1    | -          |
| chr1  | 26630977 | 26631175 | Intergenic  | Lx3_Mus L   | 113229  | NM_00103  | 210940 | 4931408C2- | -          |
| chr1  | 57027877 | 57028075 | promoter-1  | promoter-1  | 202     | NM_13914  | 212712 | Satb2      | mKIAA1034  |
| chr2  | 1.18E+08 | 1.18E+08 | intron (NM  | intron (NM  | 2076    | NM_13831  | 171543 | Bmf        | AW260063   |
| chr10 | 1.17E+08 | 1.17E+08 | intron (NM  | CpG-1519    | 313     | NM_01078  | 17246  | Mdm2       | 1700007J1  |
| chr10 | 80444302 | 80444475 | intron (NM  | intron (NM  | 19722   | NM_00103  | 14708  | Gng7       | AI840417   |
| chr5  | 66087577 | 66087700 | intron (NM  | intron (NM  | 1457    | NM_00108  | 71521  | Pds5a      | 9030416H1  |
| chr15 | 76554202 | 76554350 | promoter-1  | promoter-1  | -1      | NM_17682  | 223665 | C030006K1  | 11100331I  |
| chr2  | 26456177 | 26456625 | intron (NM  | intron (NM  | 3536    | NM_02621  | 67512  | Agpat2     | 2510002J0  |
| chr19 | 10257452 | 10257625 | 5' UTR (NM  | 5' UTR (NM  | 160     | NM_14609  | 76267  | Fads1      | 0710001OC  |
| chr3  | 1.23E+08 | 1.23E+08 | Intergenic  | Intergenic  | -13530  | NM_00893  | 19142  | Prss12     | Bssp-3 mo  |
| chr14 | 76571127 | 76571275 | Intergenic  | Intergenic  | 60503   | NM_01374  | 27275  | Nufip1     | Nufip      |
| chr2  | 13995877 | 13996175 | promoter-1  | promoter-1  | 287     | NM_01148  | 20844  | Stam       | STAM1      |
| chr7  | 1.24E+08 | 1.24E+08 | Intergenic  | Intergenic  | -7445   | NM_00113  | 53322  | Nucb2      | AI607786 C |
| chrX  | 1.54E+08 | 1.54E+08 | intron (NM  | CpG         | 484     | NM_17230  | 270669 | Mbtps2     | 9630032G2  |
| chr18 | 36488627 | 36488725 | Intergenic  | Intergenic  | -19602  | NM_00108  | 66060  | Cystm1     | 0610010O1  |
| chr2  | 27744227 | 27744550 | intron (NM  | intron (NM  | 2443    | NM_01573  | 12831  | Col5a1     | AI413331   |
| chr1  | 16646627 | 16647125 | promoter-1  | promoter-1  | 70      | NM_02645  | 67923  | Tceb1      | 2610043E2  |
| chr2  | 90780702 | 90780975 | intron (NM  | CpG         | 284     | NM_01736  | 13046  | Celf1      | 1600010OC  |
| chr1  | 97469552 | 97469900 | Intergenic  | Intergenic  | 94445   | NM_00918  | 20452  | St8sia4    | PST PST-1  |
| chr3  | 88521602 | 88521725 | intron (NR_ | intron (NR_ | 887     | NM_00116  | 19769  | Rit1       | RIBB ROC1  |
| chr1  | 1.36E+08 | 1.36E+08 | Intergenic  | B3A SINE    | 27171   | NM_00114  | 71001  | Mgat4e     | 4931440L1  |
| chr7  | 1.25E+08 | 1.25E+08 | intron (NM  | MTC LTR I   | 68845   | NM_17564  | 233781 | Xylt1      | 8030490L1  |
| chr9  | 63247327 | 63247400 | promoter-1  | promoter-1  | -312    | NM_02709  | 69478  | 2300009AC- | -          |
| chr5  | 93697077 | 93697225 | intron (NM  | CpG         | 552     | NM_00763  | 12452  | Ccng2      | -          |
| chr12 | 74997502 | 74997675 | Intergenic  | Intergenic  | -11266  | NM_01043  | 15251  | Hif1a      | AA959795   |
| chr10 | 19653302 | 19653550 | promoter-1  | promoter-1  | -906    | NM_00858  | 26408  | Map3k5     | 7420452D2  |
| chr1  | 1.8E+08  | 1.8E+08  | Intergenic  | Intergenic  | -36330  | NM_00116  | 269152 | Kif26b     | 4832420M   |
| chr2  | 1.45E+08 | 1.45E+08 | intron (NM  | intron (NM  | -103039 | NM_02549  | 66328  | Scp2d1     | 1700010M   |
| chr1  | 52712152 | 52712350 | TTS (NM_1   | TTS (NM_1   | 24702   | NM_00114  | 227094 | Tmem194k   | 5330401PC  |
| chr1  | 75212727 | 75212875 | TTS (NM_0   | TTS (NM_0   | 3027    | NM_00944  | 22145  | Tuba4a     | M[a]4 Tub  |

|       |          |          |                       |         |          |        |          |            |
|-------|----------|----------|-----------------------|---------|----------|--------|----------|------------|
| chr7  | 1.35E+08 | 1.35E+08 | intron (NML1M2 LINE   | 26697   | NM_00840 | 16409  | Itgam    | CD11b/CD1  |
| chr6  | 1.35E+08 | 1.35E+08 | Intergenic Intergenic | 32952   | NM_00128 | 13730  | Emp1     | I-8-09 TMF |
| chr1  | 21764227 | 21764350 | intron (NM intron (NM | 187735  | NM_00116 | 226922 | Kcnq5    | 7730402H1  |
| chr10 | 21696227 | 21696400 | intron (NM intron (NM | -2165   | NM_00116 | 20393  | Sgk1     | Sgk        |
| chr13 | 16417552 | 16417850 | Intergenic Intergenic | 311393  | NM_00838 | 16323  | Inhba    | -          |
| chr3  | 1.27E+08 | 1.27E+08 | 5' UTR (NM 5' UTR (NM | 232     | NM_02780 | 71481  | Alpk1    | 8430410J1  |
| chr5  | 1.35E+08 | 1.35E+08 | exon (NM_ exon (NM_   | 311     | NM_03357 | 94254  | Wbscr16  | 5730496CC  |
| chr5  | 1.4E+08  | 1.4E+08  | TTS (NR_03 TTS (NR_03 | 317     | NM_03025 | 80290  | Gpr146   | BC003323   |
| chr7  | 1.4E+08  | 1.4E+08  | intron (NM intron (NM | 65512   | NM_02960 | 76429  | Lhpp     | 2310007HC  |
| chr19 | 7131252  | 7131400  | promoter-1 promoter-1 | 68      | NM_13414 | 107227 | Macrod1  | AI604841 , |
| chrY  | 2895127  | 2895250  | Intergenic L1Md_F2 L  | 507930  | NM_00127 | 1E+08  | Gm3376   | Rbmy1b     |
| chr18 | 44552377 | 44552450 | intron (NM intron (NM | 12259   | NM_02749 | 70640  | Dcp2     | 2410015D2  |
| chr1  | 10245377 | 10245625 | Intergenic Intergenic | -22750  | NM_00110 | 211673 | Arfgef1  | ARFGEP1 E  |
| chr3  | 30355002 | 30355100 | intron (NM intron (NM | 53358   | NM_02144 | 14013  | Mecom    | D630039M   |
| chr15 | 9794577  | 9794675  | Intergenic Intergenic | -116065 | NM_17712 | 320277 | Spef2    | C230086AC  |
| chr2  | 81846102 | 81846250 | Intergenic MLT1F2 LT  | -47639  | NM_17551 | 241514 | Zfp804a  | C630007C1  |
| chr4  | 1.28E+08 | 1.28E+08 | promoter-1 promoter-1 | -545    | NM_00108 | 230761 | Zfp362   | -          |
| chr13 | 81850602 | 81850800 | promoter-1 promoter-1 | 285     | NM_02837 | 72852  | Mblac2   | 2900024O1  |
| chr2  | 66094852 | 66095000 | promoter-1 promoter-1 | -252    | NM_00129 | 73668  | Ttc21b   | 2410066K1  |
| chr5  | 1.01E+08 | 1.01E+08 | promoter-1 promoter-1 | 73      | NM_02682 | 68735  | Mrps18c  | 1110037D1  |
| chr1  | 1.33E+08 | 1.33E+08 | intron (NM CpG        | 282     | NM_00855 | 17164  | Mapkapk2 | AA960234   |
| chr1  | 1.73E+08 | 1.73E+08 | intron (NM intron (NM | 5846    | NM_01018 | 14131  | Fcgr3    | CD16       |
| chrY  | 1751752  | 1751875  | Intergenic Intergenic | -103196 | NM_00111 | 1E+08  | Gm16501  | ENSMUSGC   |
| chr5  | 38429902 | 38430025 | promoter-1 promoter-1 | -506    | NM_00128 | 71116  | Stx18    | 1810035L2  |
| chr7  | 86747077 | 86747175 | intron (NM MTD LTR    | 15417   | NM_01979 | 56315  | Rhcg     | BB065800   |
| chr8  | 1.24E+08 | 1.24E+08 | exon (NM_ exon (NM_   | 118     | NM_14560 | 234825 | Klhdc4   | AA408426   |
| chr15 | 97923652 | 97923800 | 5' UTR (NM 5' UTR (NM | 274     | NM_14485 | 223870 | Senp1    | 2310046A2  |
| chr15 | 1.01E+08 | 1.01E+08 | Intergenic Intergenic | -19676  | NM_01044 | 15370  | Nr4a1    | GFRP1 Gfr  |
| chr10 | 53127252 | 53127525 | Intergenic Intergenic | -27731  | NM_00120 | 1E+08  | Cep85l   | ENSMUSGC   |
| chr19 | 47481052 | 47481225 | intron (NM ID_B1 SINI | 57763   | NM_00116 | 14218  | Sh3pxd2a | 2310014D1  |
| chr13 | 1.01E+08 | 1.01E+08 | 5' UTR (NM 5' UTR (NM | 127     | NM_01135 | 20365  | Serf1    | 4F5 Msm    |
| chr4  | 1.34E+08 | 1.34E+08 | 5' UTR (NM 5' UTR (NM | 692     | NM_20723 | 230815 | Man1c1   | AI593348   |
| chr3  | 1.36E+08 | 1.36E+08 | intron (NM intron (NM | 34271   | NM_00129 | 19055  | Ppp3ca   | 2900074D1  |
| chr1  | 1.29E+08 | 1.29E+08 | Intergenic (TATATG)n  | -5604   | NM_17695 | 210356 | Nckap5   | 8430408F2  |
| chr17 | 35137802 | 35138400 | 5' UTR (NM 5' UTR (NM | 249     | NM_01169 | 22321  | Vars     | Bat6 D17H  |
| chr8  | 1.13E+08 | 1.13E+08 | intron (NM intron (NM | 7062    | NM_17228 | 234730 | Fuk      | 1110046B1  |
| chr16 | 36071802 | 36071900 | promoter-1 promoter-1 | 105     | NM_00115 | 381045 | Ccdc58   | A930007B1  |
| chr3  | 9828802  | 9828950  | intron (NM intron (NM | 4803    | NM_05318 | 94212  | Pag1     | Cbp F7300  |
| chr4  | 59465502 | 59465625 | Intergenic RLTR40 LT  | -14058  | NM_00116 | 634731 | Susd1    | A530080P1  |
| chr4  | 1.07E+08 | 1.07E+08 | Intergenic Intergenic | -3463   | NM_02835 | 72787  | Ndc1     | 2810475A1  |
| chr11 | 59016127 | 59016200 | promoter-1 promoter-1 | 144     | NM_02603 | 67212  | Mrpl55   | 2810038N   |
| chr2  | 3459052  | 3459275  | Intergenic Intergenic | 28826   | NM_17764 | 227526 | Cdnf     | 9330140G2  |
| chr2  | 1.15E+08 | 1.15E+08 | promoter-1 promoter-1 | 24      | NM_00114 | 399568 | BC052040 | -          |
| chr4  | 1.16E+08 | 1.16E+08 | intron (NM CpG        | 194     | NM_02986 | 77110  | Gppb111  | 5330440M   |
| chr10 | 90970352 | 90970825 | Intergenic MLT1J1 LT  | -336224 | NM_00108 | 21917  | Tmpo     | 5630400D2  |
| chr7  | 1.43E+08 | 1.43E+08 | Intergenic Intergenic | -59526  | NM_00108 | 17345  | Mki67    | D630048A:  |
| chr11 | 1.06E+08 | 1.06E+08 | promoter-1 promoter-1 | 186     | NM_02807 | 72047  | Ddx42    | 1810047H2  |

|       |          |          |                       |         |           |          |           |            |
|-------|----------|----------|-----------------------|---------|-----------|----------|-----------|------------|
| chr16 | 14162377 | 14162500 | promoter-1promoter-1  | -930    | NM_02331  | 67203    | Nde1      | 2810027M   |
| chr12 | 66137277 | 66137800 | intron (NM CpG        | 217     | NM_17780  | 328110   | Prpf39    | Srca1      |
| chr15 | 98661977 | 98662200 | promoter-1promoter-1  | -149    | NM_01678  | 19082    | Prkag1    | AA571379   |
| chr4  | 1.33E+08 | 1.33E+08 | Intergenic MIR SINE   | 27330   | NM_01695  | 15331    | Hmgn2     | HMG-17 H   |
| chr10 | 59740702 | 59740775 | intron (NM intron (NM | 362     | NM_00114  | 19156    | Psap      | AI037048 ! |
| chr3  | 1.06E+08 | 1.06E+08 | exon (NM_ exon (NM_   | 245     | NM_00127  | 72121    | Dennd2d   | 2010308M   |
| chrX  | 68540602 | 68540700 | intron (NM intron (NM | 72394   | NM_01992  | 17772    | Mtm1      | AF073996   |
| chr6  | 50546427 | 50546625 | promoter-1promoter-1  | 63      | NM_02756  | 70821    | 4921507PC | TISP74     |
| chr9  | 31194127 | 31194250 | intron (NM CpG        | 411     | NM_17276  | 235134   | Nfrkb     | A530090G:  |
| chr2  | 72875577 | 72875925 | Intergenic MIR SINE   | -57248  | NM_00101  | 20687    | Sp3       | D130027J0  |
| chr8  | 1.11E+08 | 1.11E+08 | intron (NM intron (NM | 8394    | NM_00749  | 11906    | Zfhx3     | A230102L0  |
| chr8  | 34769977 | 34770050 | intron (NM PB1D7 SIN  | 6303    | NM_01034  | 14782    | Gsr       | AI325518 I |
| chrX  | 1.31E+08 | 1.31E+08 | intron (NM CpG        | 208     | NM_01986  | 19982    | Rpl36a    | L44L Rpl44 |
| chr17 | 24328452 | 24328775 | intron (NMB3 SINE B.  | 8289    | NM_00116  | 224617   | Tbc1d24   | 9630033P1  |
| chr16 | 4886452  | 4886575  | intron (NM CpG        | 413     | NM_00125  | 17237    | Mgrn1     | 2610042J2  |
| chr15 | 38943477 | 38943600 | promoter-1promoter-1  | 724     | NM_17240  | 69906    | Slc25a32  | 2610043O1  |
| chr7  | 1.38E+08 | 1.38E+08 | promoter-1promoter-1  | 89      | NM_13394  | 101476   | Plekha1   | AA960558   |
| chr5  | 1.08E+08 | 1.08E+08 | promoter-1promoter-1  | -215    | NM_00125  | 1.01E+08 | Btbd8     | EG627196   |
| chr7  | 63458477 | 63458600 | intron (NM intron (NM | -36603  | NM_02187  | 18431    | Oca2      | D7H15S12   |
| chr11 | 49063627 | 49063850 | promoter-1promoter-1  | -316    | NM_00111  | 17308    | Mgat1     | Mgat-1     |
| chr11 | 83567152 | 83567425 | exon (NM_ exon (NM_   | 149     | NM_14543  | 217026   | Heatr6    | 2700008B1  |
| chr2  | 25128052 | 25128275 | promoter-1promoter-1  | 177     | NM_17530  | 99152    | Anapc2    | 9230107KC  |
| chr15 | 96474002 | 96474150 | promoter-1promoter-1  | -732    | NM_00116  | 105727   | Slc38a1   | AA408026   |
| chr2  | 26771052 | 26771225 | promoter-1promoter-1  | -803    | NM_01367  | 20931    | Surf2     | Surf-2     |
| chr5  | 91118677 | 91118975 | Intergenic Intergenic | -49313  | NM_02847  | 73246    | Rassf6    | 1600016B1  |
| chr1  | 1.52E+08 | 1.52E+08 | intron (NM intron (NM | -1330   | NM_13378  | 108989   | Tpr       | 2610029M   |
| chr10 | 80041002 | 80041100 | Intergenic Intergenic | -1010   | NM_07847  | 118445   | Klf16     | AI843742 I |
| chr13 | 43345827 | 43345900 | intron (NM intron (NM | 53678   | NM_00103  | 328232   | Gfod1     | 9630032O1  |
| chr11 | 60692827 | 60693000 | promoter-1promoter-1  | -373    | NM_00116  | 216821   | Tmem11    | 5730466P1  |
| chr5  | 92797252 | 92797450 | intron (NM ID4 SINE I | -5029   | NR_038116 | 56066    | Cxcl11    | Cxc11 H17  |
| chr7  | 1.13E+08 | 1.13E+08 | exon (NM_ exon (NM_   | 239     | NM_01142  | 20597    | Smpd1     | A-SMase A  |
| chr1  | 89724877 | 89725075 | exon (NM_ exon (NM_   | 24721   | NM_00911  | 20215    | Sag       | A930001K1  |
| chr18 | 6753502  | 6753625  | Intergenic Lx8 LINE L | -11602  | NM_18107  | 19330    | Rab18     | AA959686   |
| chr12 | 1.05E+08 | 1.05E+08 | Intergenic Intergenic | 39591   | NM_00125  | 20700    | Serpina1a | Aat-2 Aat2 |
| chr2  | 83582952 | 83583075 | intron (NMB3 SINE B.  | 18459   | NM_00840  | 16410    | Itgav     | 1110004F1  |
| chr14 | 27350727 | 27350950 | intron (NM intron (NM | 2388    | NM_03200  | 83997    | Smap      | D330001LC  |
| chr11 | 78798802 | 78798900 | promoter-1promoter-1  | -425    | NM_01070  | 16859    | Lgals9    | AA407335   |
| chr7  | 54968552 | 54968750 | Intergenic RMER5 LTI  | -111909 | NM_15306  | 233222   | Mrgpra3   | Mrga3      |
| chr12 | 8928927  | 8929175  | exon (NM_ exon (NM_   | 938     | NM_00864  | 17775    | Laptm4a   | AA286466   |
| chr9  | 1.07E+08 | 1.07E+08 | intron (NM intron (NM | 6832    | NM_17890  | 102626   | Mapkapk3  | 3PK AI874  |
| chr10 | 29033077 | 29033225 | promoter-1promoter-1  | -155    | NM_02585  | 52665    | Echdc1    | 1700028A2  |
| chr3  | 1.42E+08 | 1.42E+08 | intron (NM CpG        | 622     | NM_00119  | 56376    | Pdlim5    | 1110001AC  |
| chr1  | 14299552 | 14299675 | intron (NM intron (NM | 667     | NM_00125  | 14048    | Eya1      | bor        |
| chr2  | 1.27E+08 | 1.27E+08 | promoter-1promoter-1  | -105    | NM_02322  | 66552    | Sppl2a    | 2010106GC  |
| chr3  | 1.18E+08 | 1.18E+08 | exon (NM_ exon (NM_   | 128     | NM_00119  | 76561    | Snx7      | 2510028HC  |
| chr1  | 79772452 | 79772925 | promoter-1promoter-1  | 95      | NM_00108  | 69163    | Mrpl44    | 1810030E1  |
| chr2  | 73374202 | 73374550 | Intergenic MTEa-int L | -6832   | NM_15313  | 215280   | Wipf1     | AI115543 I |



|       |          |          |              |            |         |           |        |          |            |
|-------|----------|----------|--------------|------------|---------|-----------|--------|----------|------------|
| chr9  | 31088852 | 31089150 | Intergenic   | Intergenic | 10015   | NM_00110  | 638580 | Gm7244   | EG638580   |
| chr15 | 57907702 | 57907800 | 5' UTR (NM   | 5' UTR (NM | 312     | NM_00104  | 22770  | Zhx1     | -          |
| chr1  | 34542327 | 34542975 | Intergenic   | Intergenic | -12624  | NM_00935  | 21755  | Prss39   | Tesp1      |
| chr2  | 1.81E+08 | 1.81E+08 | non-coding   | non-coding | 111     | NM_00127  | 13002  | Dnajc5   | 2610314I2  |
| chr4  | 57598277 | 57598500 | intron (NM   | intron (NM | 17268   | NM_17286  | 242481 | Palm2    | 53-H12 B1  |
| chr7  | 16973127 | 16973375 | promoter-1   | promoter-1 | -6      | NM_01974  | 56459  | Sae1     | 2400010M   |
| chr12 | 52930052 | 52930450 | 5' UTR (NM   | 5' UTR (NM | 272     | NM_14478  | 207304 | Hectd1   | A630086PC  |
| chr14 | 55713852 | 55714075 | 5' UTR (NM   | 5' UTR (NM | 342     | NM_15308  | 105663 | Thtpa    | AW122966   |
| chr2  | 3563102  | 3563225  | Intergenic   | Intergenic | -67567  | NM_02562  | 66540  | Fam107b  | 3110001A1  |
| chr2  | 98779302 | 98779425 | Intergenic   | Intergenic | 1471549 | NM_17872  | 241568 | Lrrc4c   | 6430556C1  |
| chr7  | 51655527 | 51655875 | TTS (NM_0    | TTS (NM_0  | 16205   | NM_01666  | 20981  | Syt3     | AI385753 : |
| chr13 | 13651052 | 13651525 | Intergenic   | Intergenic | -31388  | NM_01074  | 17101  | Lyst     | D13Sfk13 I |
| chr10 | 31329327 | 31329550 | promoter-1   | promoter-1 | 93      | NM_00114  | 268291 | Rnf217   | AU016819   |
| chrX  | 1.03E+08 | 1.03E+08 | intron (NM   | intron (NM | 6312    | NM_20582  | 279572 | Tlr13    | AI666735 I |
| chr18 | 67529677 | 67529950 | Intergenic   | Intergenic | -20572  | NM_02647  | 67951  | Tubb6    | 2310057H1  |
| chr6  | 1.29E+08 | 1.29E+08 | Intergenic   | CpG        | -10579  | NM_00115  | 17059  | Klrb1c   | AI462337 I |
| chr3  | 95086227 | 95086475 | promoter-1   | promoter-1 | -353    | NM_17334  | 229589 | Prune    | 9230112OC  |
| chr6  | 1.49E+08 | 1.49E+08 | promoter-1   | promoter-1 | -222    | NM_00125  | 320204 | Mettl20  | 4833442J1' |
| chr19 | 6364227  | 6364425  | intron (NR   | CpG        | 636     | NR_122118 | 22668  | Sf1      | BBP MZFM   |
| chr11 | 90102052 | 90102225 | Intergenic   | Intergenic | -8652   | NM_02617  | 67468  | Mmd      | 1200017E0  |
| chr9  | 1.22E+08 | 1.22E+08 | promoter-1   | promoter-1 | -541    | NM_17867  | 215474 | Sec22c   | 4932412K2  |
| chr1  | 1.07E+08 | 1.07E+08 | 5' UTR (NM   | 5' UTR (NM | 71861   | NM_17877  | 320311 | Rnf152   | A930029BC  |
| chr2  | 71337977 | 71338250 | intron (NM   | intron (NM | -29389  | NM_01005  | 13390  | Dlx1     | Dlx Dlx-1  |
| chr7  | 1.34E+08 | 1.34E+08 | intron (NMB1 | Mus1 :     | 7230    | NM_02320  | 66422  | Dctpp1   | 2410015N1  |
| chr1  | 30929727 | 30929925 | Intergenic   | Intergenic | -9725   | NM_00108  | 213109 | Phf3     | 2310061N1  |
| chr12 | 87046702 | 87046875 | intron (NM   | intron (NM | 19118   | NM_01676  | 53314  | Batf     | B-ATF SFA  |
| chr10 | 40244227 | 40244475 | Intergenic   | Intergenic | -45817  | NM_02757  | 70840  | Slc22a16 | 4921504E1  |
| chr17 | 79365577 | 79365925 | exon (NM_    | exon (NM_  | 29276   | NM_02861  | 73694  | Ndufaf7  | 2410091C1  |
| chr3  | 1.06E+08 | 1.06E+08 | intron (NM   | intron (NM | 10068   | NM_02811  | 72121  | Dennd2d  | 2010308M   |
| chr11 | 79997977 | 79998175 | intron (NM   | intron (NM | 702     | NM_02801  | 71956  | Rnf135   | 0610037NC  |
| chr3  | 1.16E+08 | 1.16E+08 | promoter-1   | promoter-1 | 211     | NM_02321  | 66500  | Slc30a7  | 1810059J1' |
| chr19 | 53406602 | 53406875 | intron (NM   | intron (NM | 1802    | NM_00100  | 17859  | Mxi1     | ENSMUSGC   |
| chr4  | 62069877 | 62069950 | promoter-1   | promoter-1 | 96      | NM_02729  | 70052  | Prpf4    | 1600015H1  |
| chr16 | 17181477 | 17181725 | intron (NML3 | LINE Cf    | 19984   | NM_00945  | 22195  | Ube2l3   | C79827 Uk  |
| chr6  | 39542352 | 39542475 | promoter-1   | promoter-1 | -169    | NM_02661  | 68198  | Ndufb2   | 1810011OC  |
| chr1  | 1.3E+08  | 1.3E+08  | intron (NM   | intron (NM | -26930  | NM_00856  | 17219  | Mcm6     | ASP-11 D1\ |
| chr3  | 1.33E+08 | 1.33E+08 | Intergenic   | Intergenic | -79009  | NM_00104  | 214133 | Tet2     | Ayu17-449  |
| chr7  | 26434902 | 26435100 | intron (NM   | intron (NM | 8779    | NM_00753  | 12039  | Bckdha   | -          |
| chr7  | 1.38E+08 | 1.38E+08 | exon (NM_    | exon (NM_  | 344     | NM_00116  | 67872  | Nsmce4a  | 2410003A1  |
| chr3  | 94820677 | 94820775 | Intergenic   | Intergenic | -1566   | NM_03007  | 78266  | Zfp687   | 4931408LO  |
| chr7  | 1.07E+08 | 1.07E+08 | Intergenic   | Intergenic | -9158   | NM_17538  | 108937 | Rnf169   | 2900057KC  |
| chr8  | 1.03E+08 | 1.03E+08 | Intergenic   | L1M4c LIN  | -850342 | NM_00103  | 12564  | Cdh8     | AI851472 I |
| chr16 | 59472802 | 59472950 | intron (NM   | intron (NM | 1275    | NM_02591  | 67014  | Mina     | 1810047JO  |
| chr8  | 47619302 | 47619650 | intron (NM   | intron (NM | -17947  | NM_02797  | 71876  | Cenpu    | 1700029A2  |
| chr3  | 95119902 | 95120050 | intron (NM   | intron (NM | 802     | NM_02978  | 76893  | Cers2    | 061001311' |
| chr17 | 3104202  | 3104375  | Intergenic   | Intergenic | -10684  | NM_13412  | 106583 | Scaf8    | A630086M   |
| chr16 | 32130352 | 32130700 | Intergenic   | Intergenic | 30638   | NM_02589  | 66994  | Cep19    | 1500031LO  |

|       |          |          |                       |        |           |        |            |            |
|-------|----------|----------|-----------------------|--------|-----------|--------|------------|------------|
| chr9  | 44774177 | 44774475 | promoter-1promoter-1  | -643   | NM_14540  | 140630 | Ube4a      | 4732444G1  |
| chr4  | 1.29E+08 | 1.29E+08 | Intergenic CpG        | -9560  | NM_00897  | 19244  | Ptp4a2     | Prl-2      |
| chr4  | 43617902 | 43618175 | Intergenic Intergenic | -20672 | NM_00109  | 1E+08  | Msmg       | OTTMUSG(   |
| chr7  | 13551627 | 13551725 | intron (NM intron (NM | 463    | NM_17873  | 243834 | Zfp324     | A930002M   |
| chr9  | 44075502 | 44075625 | intron (NM intron (NM | 707    | NM_00116  | 270151 | Nlrx1      | BC034204   |
| chr17 | 31648852 | 31649325 | intron (NM CpG        | 344    | NM_02132  | 57773  | Wdr4       | AI415180 , |
| chr13 | 1.12E+08 | 1.12E+08 | intron (NM CpG        | 386    | NM_02848  | 73274  | Gppb1      | 1700034P1  |
| chr7  | 1.41E+08 | 1.41E+08 | intron (NM intron (NM | 47892  | NM_00740  | 11489  | Adam12     | Mltna mKI  |
| chr12 | 1.1E+08  | 1.1E+08  | promoter-1promoter-1  | -895   | NM_00953  | 22632  | Yy1        | AW488674   |
| chr11 | 1.07E+08 | 1.07E+08 | intron (NM intron (NM | 42696  | NM_14582  | 71795  | Pitpnc1    | 1110020BC  |
| chr3  | 41935677 | 41935800 | Intergenic Intergenic | 389198 | NM_02727  | 73852  | D3ErtD751  | 281000901  |
| chr8  | 4324452  | 4325025  | promoter-1promoter-1  | 362    | NM_01048  | 15568  | Elavl1     | 2410055NC  |
| chr1  | 87600302 | 87600800 | intron (NM intron (NM | 32630  | NM_17705  | 319997 | A630001G;- |            |
| chr12 | 1.12E+08 | 1.12E+08 | exon (NM_exon (NM_    | 164    | NM_01202  | 26931  | Ppp2r5c    | 2610043M   |
| chr10 | 85334677 | 85334800 | exon (NM_exon (NM_    | 162    | NM_13399  | 103136 | Pwp1       | 2310058A1  |
| chr19 | 3388827  | 3389300  | promoter-1promoter-1  | 206    | NM_00103  | 17771  | Mtl5       | tesmin     |
| chr6  | 97155027 | 97155150 | intron (NM intron (NM | 548    | NM_00111  | 22200  | Uba3       | A830034NC  |
| chr9  | 55103452 | 55103775 | intron (NM intron (NM | 27819  | NM_03200  | 83961  | Nrg4       | AI552600   |
| chr2  | 1.54E+08 | 1.54E+08 | 5' UTR (NV 5' UTR (NV | 114    | NM_02936  | 75608  | Chmp4b     | 2010012FO  |
| chr3  | 86812352 | 86812575 | Intergenic RLTR13D3   | -9201  | NM_00763  | 12479  | Cd1d1      | AI747460 c |
| chr7  | 31702352 | 31702500 | Intergenic MLT1B LTF  | -2575  | NM_01075  | 17136  | Mag        | Gma siglec |
| chr13 | 36055602 | 36055825 | Intergenic MER34-int  | -4062  | NM_02962  | 76487  | Ppp1r3g    | 1600032L1  |
| chr6  | 40968727 | 40968800 | Intergenic ORR1E-int  | 16745  | NM_02333  | 67373  | 2210010CC  | AV072249   |
| chr7  | 29997177 | 29997425 | intron (NM intron (NM | 1751   | NM_00116  | 320225 | Catsperg1  | A230107CC  |
| chrX  | 96331702 | 96331825 | 5' UTR (NV 5' UTR (NV | 294    | NM_01011  | 13641  | Efnb1      | Cek5-L EFL |
| chr6  | 83275677 | 83275925 | promoter-1promoter-1  | -232   | NM_14557  | 232157 | Mob1a      | 4022402HC  |
| chr9  | 1.18E+08 | 1.18E+08 | intron (NM CpG        | 523    | NM_01372  | 27215  | Azi2       | AA410145   |
| chr6  | 1.25E+08 | 1.25E+08 | promoter-1promoter-1  | 52     | NM_00108  | 22317  | Vamp1      | Syb-1 Syb1 |
| chr12 | 31786427 | 31786975 | Intergenic Lx6 LINE L | 27868  | NM_02782  | 104943 | Fam110c    | 9030611O1  |
| chr8  | 32278127 | 32278250 | intron (NM L2 LINE L2 | 1008   | NM_02645  | 67920  | Mak16      | 2600016BC  |
| chr17 | 80482677 | 80482800 | Intergenic Intergenic | -21130 | NM_14480  | 72692  | Hnrnp1l    | 2510028HC  |
| chr4  | 1.36E+08 | 1.36E+08 | 5' UTR (NV 5' UTR (NV | 167    | NM_00955  | 22704  | Zfp46      | AI426962 l |
| chr1  | 92499477 | 92499600 | promoter-1promoter-1  | -462   | NM_13380  | 108679 | Cops8      | 9430009JO  |
| chr3  | 90393102 | 90393300 | promoter-1promoter-1  | -968   | NM_00119  | 628324 | S100a2     | CaN19 EG6  |
| chr4  | 49251777 | 49251950 | intron (NM intron (NM | 169160 | NM_14536  | 209186 | Acnat2     | C730036D1  |
| chr14 | 52639777 | 52639950 | promoter-1promoter-1  | -475   | NM_00125  | 69890  | Zfp219     | 2010302A1  |
| chr10 | 1.2E+08  | 1.2E+08  | promoter-1promoter-1  | -603   | NM_02543  | 66225  | Llph       | 1190005P1  |
| chr4  | 1.33E+08 | 1.33E+08 | Intergenic CpG        | -60262 | NM_00108  | 93760  | Arid1a     | 1110030E0  |
| chr6  | 1.2E+08  | 1.2E+08  | Intergenic ORR1E LTF  | -8327  | NM_00835  | 16172  | Il17ra     | AW538159   |
| chr10 | 67061477 | 67061650 | Intergenic Intergenic | -49860 | NM_00100  | 211488 | Ado        | Gm237      |
| chr19 | 39005327 | 39005475 | promoter-1promoter-1  | -79    | NM_00823  | 15201  | Hells      | AI323785 l |
| chr1  | 1.09E+08 | 1.09E+08 | intron (NM CpG        | 464    | NM_00919  | 20479  | Vps4b      | 8030489C1  |
| chr5  | 97212552 | 97212650 | 3' UTR (NV 3' UTR (NV | -9803  | NM_01347  | 11745  | Anxa3      | Anx3       |
| chr19 | 5118027  | 5118225  | non-coding non-coding | 282    | NR_045528 | 16594  | Klc2       | 8030455FO  |
| chr5  | 74590902 | 74591250 | promoter-1promoter-1  | -275   | NM_02687  | 68939  | Rasl11b    | 1190017B1  |
| chr16 | 36985752 | 36985875 | Intergenic ORR1D1 L   | -6591  | NM_00103  | 207215 | Fbxo40     | 9830003A1  |
| chr1  | 97236252 | 97236425 | Intergenic RMER19B    | 26133  | NM_02632  | 67698  | Fam174a    | 2310044D2  |

|       |          |          |            |            |         |          |        |            |            |
|-------|----------|----------|------------|------------|---------|----------|--------|------------|------------|
| chr7  | 30601452 | 30601550 | intron (NM | intron (NM | 410     | NM_00114 | 233056 | Zfp790     | 6330581L2  |
| chr10 | 17241827 | 17242000 | Intergenic | Intergenic | -201121 | NM_01082 | 17684  | Cited2     | AI835299 I |
| chr6  | 53401952 | 53402050 | Intergenic | Intergenic | -121367 | NM_17272 | 231991 | Creb5      | Crebpa D4  |
| chr7  | 1.51E+08 | 1.51E+08 | Intergenic | Intergenic | 9772    | NM_20349 | 381974 | Mrgprg     | Gm1098 N   |
| chr1  | 72190852 | 72191375 | Intergenic | RLTR19 LT  | 67768   | NM_00100 | 381269 | Mreg       | Gm974 W    |
| chr3  | 1.21E+08 | 1.21E+08 | Intergenic | Intergenic | -15751  | NM_14539 | 213603 | Slc44a3    | BC010552   |
| chr1  | 1.84E+08 | 1.84E+08 | Intergenic | Intergenic | -15855  | NM_01205 | 27058  | Srp9       | 9kDa       |
| chr9  | 54582127 | 54582225 | 5' UTR (NM | 5' UTR (NM | 180     | NM_02319 | 66317  | Wdr61      | 2700038L1  |
| chr15 | 77786927 | 77787400 | promoter-1 | promoter-1 | -11     | NM_00101 | 239554 | Foxred2    | A430097D   |
| chr10 | 80598377 | 80598500 | promoter-1 | promoter-1 | -578    | NM_01073 | 16969  | Zbtb7a     | 9030619KC  |
| chr17 | 80952527 | 80952850 | intron (NM | intron (NM | 10486   | NM_00103 | 381113 | Cdkl4      | AU067824   |
| chr1  | 37486452 | 37486600 | promoter-1 | promoter-1 | 422     | NM_19800 | 76178  | Coa5       | 1700001A2  |
| chr9  | 64584227 | 64584450 | intron (NM | intron (NM | 1225    | NM_01738 | 53869  | Rab11a     | -          |
| chr10 | 66999002 | 66999075 | Intergenic | CpG        | -1579   | NM_01011 | 13654  | Egr2       | Egr-2 Krox |
| chr10 | 20301177 | 20301325 | intron (NM | intron (NM | 143623  | NM_01387 | 29863  | Pde7b      | -          |
| chr1  | 62726052 | 62726325 | Intergenic | RMER10A    | -23703  | NM_00107 | 18187  | Nrp2       | 1110048PC  |
| chr18 | 39180252 | 39180375 | intron (NM | intron (NM | 27514   | NM_17516 | 71302  | Arhgap26   | 1810044B2  |
| chr1  | 1.79E+08 | 1.79E+08 | Intergenic | Intergenic | 44011   | NM_01391 | 30928  | Zbtb18     | RP58 Zfp2  |
| chr14 | 47451827 | 47452100 | promoter-1 | promoter-1 | 44      | NM_02683 | 68755  | Cgrrf1     | 1110038GC  |
| chr13 | 1.14E+08 | 1.14E+08 | intron (NM | intron (NM | 6362    | NM_02815 | 72198  | Skiv2l2    | 2610528A1  |
| chr11 | 51394902 | 51395150 | 3' UTR (NM | 3' UTR (NM | -3233   | NM_02839 | 72947  | Phykpl     | 2900006B1  |
| chr3  | 85375302 | 85375475 | Intergenic | Intergenic | -2663   | NM_14489 | 229487 | Pet112     | 9430026F0  |
| chr8  | 1.08E+08 | 1.08E+08 | 5' UTR (NM | 5' UTR (NM | 125     | NM_18132 | 13018  | Ctcf       | AW108038   |
| chr11 | 1.03E+08 | 1.03E+08 | intron (NM | intron (NM | 3411    | NM_01967 | 57778  | Fmnl1      | 8030453N1  |
| chr9  | 1.14E+08 | 1.14E+08 | intron (NM | intron (NM | 7156    | NM_17862 | 72179  | Fbxl2      | 2810423A2  |
| chr2  | 69699752 | 69700175 | intron (NM | CpG        | 344     | NM_00927 | 20823  | Ssb        | SS-B       |
| chr15 | 76991327 | 76991625 | intron (NM | intron (NM | -7234   | NM_00128 | 93686  | Rbfox2     | Fbm2 Fxb   |
| chr13 | 1.13E+08 | 1.13E+08 | Intergenic | Intergenic | -209722 | NM_01194 | 26401  | Map3k1     | MAPKKK1    |
| chr11 | 78364327 | 78364725 | promoter-1 | promoter-1 | -289    | NM_13370 | 69071  | Tmem97     | 1810014L1  |
| chr4  | 82505352 | 82505525 | 5' UTR (NM | 5' UTR (NM | 127     | NM_02664 | 68268  | Zdhhc21    | 9130404H1  |
| chr10 | 57961352 | 57961500 | intron (NM | intron (NM | 741     | NM_00116 | 76138  | Ccdc138    | 6230424HC  |
| chrX  | 1.37E+08 | 1.37E+08 | intron (NM | CpG        | 646     | NM_02146 | 19139  | Prps1      | 2310010D1  |
| chr7  | 87484202 | 87484350 | intron (NM | intron (NM | 829     | NM_13395 | 101869 | Unc45a     | AW538196   |
| chr11 | 28297377 | 28297500 | intron (NM | intron (NM | 186886  | NM_00116 | 216613 | Ccdc85a    | -          |
| chr12 | 74685727 | 74685975 | promoter-1 | promoter-1 | -177    | NM_00885 | 18755  | Prkch      | Pkch       |
| chr3  | 96025402 | 96025550 | promoter-1 | promoter-1 | 432     | NM_17821 | 319190 | Hist2h2be  | AV127319   |
| chr4  | 1.18E+08 | 1.18E+08 | intron (NM | intron (NM | 460     | NM_02322 | 107995 | Cdc20      | 2310042NC  |
| chr9  | 34412552 | 34412850 | intron (NM | intron (NM | 116385  | NM_00119 | 67703  | Kirrel3    | 1500010O2  |
| chr16 | 33966852 | 33967300 | promoter-1 | promoter-1 | 13      | NM_00947 | 22247  | Umps       | 1700095D2  |
| chr14 | 49792052 | 49792225 | intron (NM | G-rich Low | 236     | NM_00108 | 70646  | Naa30      | 4930487N1  |
| chr7  | 52124777 | 52124925 | exon (NM_  | exon (NM_  | 307     | NM_13394 | 84113  | Ptov1      | 1110030GC  |
| chr10 | 59342377 | 59342700 | exon (NM_  | exon (NM_  | 199     | NM_01996 | 56709  | Dnajb12    | Dj10 mDj1  |
| chr15 | 76779327 | 76779625 | intron (NM | intron (NM | 502     | NM_05409 | 117171 | 1110038F1- | -          |
| chr6  | 67485227 | 67485350 | exon (NM_  | exon (NM_  | 528     | NM_02004 | 56753  | Tacstd2    | C80403 EG  |
| chr16 | 31080902 | 31081150 | exon (NM_  | exon (NM_  | 492     | NM_19862 | 268880 | Xxylt1     | AI480653   |
| chr12 | 74213702 | 74213850 | exon (NM_  | exon (NM_  | 456     | NM_01138 | 20474  | Six4       | AI047561 , |
| chr1  | 63522202 | 63522450 | intron (NM | intron (NM | 29848   | NM_01178 | 23792  | Adam23     | AW046396   |

|       |          |          |            |            |          |          |        |          |            |
|-------|----------|----------|------------|------------|----------|----------|--------|----------|------------|
| chr2  | 90910252 | 90910625 | promoter-1 | promoter-1 | 34       | NM_02672 | 68427  | Slc39a13 | 1100001L1  |
| chr2  | 1.26E+08 | 1.26E+08 | intron (NM | intron (NM | 18026    | NM_00823 | 15186  | Hdc      | AW108189   |
| chr4  | 46828177 | 46828425 | intron (NM | intron (NM | -165230  | NM_19866 | 381605 | Tbc1d2   | A630005A0  |
| chr8  | 1.09E+08 | 1.09E+08 | intron (NM | intron (NM | 18420    | NM_17303 | 272538 | Tango6   | AW413431   |
| chr13 | 91364102 | 91364300 | promoter-1 | promoter-1 | -609     | NM_02577 | 66795  | Atg10    | 5330424L2  |
| chr1  | 1.82E+08 | 1.82E+08 | Intergenic | Intergenic | -33645   | NM_00112 | 19165  | Psen2    | ALG-3 Ad4  |
| chr6  | 1.13E+08 | 1.13E+08 | promoter-1 | promoter-1 | 263      | NM_13393 | 101206 | Tada3    | 1110004B1  |
| chr10 | 53317077 | 53317350 | intron (NM | CpG        | 446      | NM_02554 | 66403  | Asf1a    | 2310079C1  |
| chr7  | 19851502 | 19851575 | intron (NM | intron (NM | 5665     | NM_00128 | 22323  | Vasp     | -          |
| chr11 | 68936077 | 68936200 | exon (NM_  | exon (NM_  | 2183     | NM_03304 | 84653  | Hes7     | bHLHb37    |
| chr13 | 59343352 | 59343650 | Intergenic | Intergenic | 302311   | NM_00128 | 67269  | Agtbbp1  | 1700020N1  |
| chr15 | 98314802 | 98315000 | Intergenic | Intergenic | -1787    | NM_01067 | 16770  | Lalba    | AW208827   |
| chr3  | 1.23E+08 | 1.23E+08 | intron (NM | CpG        | 477      | NM_13385 | 99526  | Usp53    | AA939927   |
| chr6  | 1.3E+08  | 1.3E+08  | intron (NM | (TA)n Sim  | -6092    | NM_00845 | 16628  | Klra10   | Ly49J Ly49 |
| chr1  | 1.53E+08 | 1.53E+08 | Intergenic | MTD LTR I  | -73640   | NM_00103 | 117198 | Ivns1abp | 1190004M   |
| chr4  | 1.34E+08 | 1.34E+08 | promoter-1 | promoter-1 | -695     | NM_01695 | 15331  | Hmgn2    | HMG-17 H   |
| chr5  | 1.47E+08 | 1.47E+08 | Intergenic | Intergenic | 17301    | NM_00125 | 74132  | Rnf6     | 1200013I0  |
| chr9  | 1.09E+08 | 1.09E+08 | exon (NM_  | exon (NM_  | 1225     | NM_08043 | 107934 | Celsr3   | Fmi1 flami |
| chr7  | 1.13E+08 | 1.13E+08 | TTS (NM_0  | TTS (NM_0  | 1209     | NM_01950 | 14356  | Timm10b  | Fxc1 Tim10 |
| chr5  | 1.45E+08 | 1.45E+08 | Intergenic | Intergenic | -1129    | NM_17768 | 231874 | Ccz1     | AU022870   |
| chr11 | 54785552 | 54785650 | Intergenic | Intergenic | -9159    | NM_00127 | 57783  | Tnip1    | ABIN ABIN  |
| chr4  | 1.36E+08 | 1.36E+08 | 5' UTR (NV | 5' UTR (NV | 367      | NM_00955 | 22704  | Zfp46    | AI426962 I |
| chr8  | 13105702 | 13105850 | promoter-1 | promoter-1 | 55       | NM_14620 | 99375  | Cul4a    | 2810470J2  |
| chr16 | 70314152 | 70314550 | 5' UTR (NV | 5' UTR (NV | 157      | NM_02880 | 74185  | Gbe1     | 2310045H1  |
| chr9  | 1.1E+08  | 1.1E+08  | intron (NM | intron (NM | 305      | NM_01875 | 54369  | Nme6     | nm23-M6    |
| chr9  | 1.08E+08 | 1.08E+08 | intron (NM | CpG        | 187      | NM_01125 | 19654  | Rbm6     | 4930506F1  |
| chr9  | 1.01E+08 | 1.01E+08 | intron (NM | B3 SINE B  | 107193   | NM_02583 | 66904  | Pccb     | 1300012PC  |
| chr9  | 64880102 | 64880600 | promoter-1 | promoter-1 | 86       | NM_02890 | 74388  | Dpp8     | 2310004I0  |
| chr11 | 87603377 | 87603800 | Intergenic | RLTR33 LT  | -3698    | NM_01082 | 17523  | Mpo      | mKIAA403   |
| chr11 | 53317527 | 53317600 | Intergenic | Intergenic | -15675   | NM_03314 | 20362  | 8-Sep    | AW046166   |
| chr10 | 1.27E+08 | 1.27E+08 | Intergenic | HAL1 LINE  | 38485    | NM_02730 | 70061  | Sdr9c7   | 1810054F2  |
| chr12 | 81155427 | 81155500 | Intergenic | L3 LINE Cf | 58537    | NM_00756 | 12192  | Zfp36l1  | AW742437   |
| chr6  | 1.25E+08 | 1.25E+08 | Intergenic | Intergenic | 39885    | NM_00765 | 12527  | Cd9      | Tspan29    |
| chr15 | 36211702 | 36211800 | intron (NM | intron (NM | 1151     | NM_01392 | 30945  | Rnf19a   | AA032313   |
| chr3  | 88357327 | 88357400 | promoter-1 | promoter-1 | -275     | NM_03352 | 94232  | Ubqln4   | A1Up A1u   |
| chr8  | 84907327 | 84907600 | intron (NM | intron (NM | 19022    | NM_00125 | 16168  | Il15     | AI503618 I |
| chr8  | 93372027 | 93372300 | intron (NM | intron (NM | 19429    | NM_17722 | 109151 | Chd9     | 1810014J1  |
| chr8  | 18950052 | 18950450 | 5' UTR (NV | 5' UTR (NV | 620      | NM_00128 | 319581 | Xkr5     | 5430438HC  |
| chr4  | 76178802 | 76179075 | intron (NM | intron (NM | -1254748 | NM_02584 | 66928  | Tmem261  | 1700027K2  |
| chr12 | 86470452 | 86470900 | intron (NM | intron (NM | 18893    | NM_03022 | 78920  | Dlst     | 1600017E0  |
| chr2  | 1.19E+08 | 1.19E+08 | promoter-1 | promoter-1 | -158     | NM_13385 | 108907 | Nusap1   | 2610201A1  |
| chr1  | 88255152 | 88255500 | promoter-1 | promoter-1 | 704      | NM_01088 | 17975  | Ncl      | B530004O   |
| chr1  | 1.45E+08 | 1.45E+08 | intron (NM | ORR1E LTF  | -7339    | NM_02002 | 26878  | B3galt2  | -          |
| chr7  | 52003477 | 52003600 | promoter-1 | promoter-1 | 181      | NM_00128 | 243963 | Zfp473   | D030014N   |
| chr2  | 1.21E+08 | 1.21E+08 | TTS (NM_1  | TTS (NM_1  | 157      | NM_01076 | 17151  | Ccndbp1  | AU022347   |
| chr2  | 1.48E+08 | 1.48E+08 | Intergenic | ORR1E LTF  | -2100    | NM_00921 | 20608  | Sstr4    | Smstr4 sst |
| chr3  | 89084252 | 89084425 | promoter-1 | promoter-1 | 535      | NM_00116 | 13636  | Efna1    | AI325262 I |

|       |          |          |            |            |        |          |        |          |            |
|-------|----------|----------|------------|------------|--------|----------|--------|----------|------------|
| chr6  | 1.47E+08 | 1.47E+08 | Intergenic | Intergenic | -3963  | NM_02531 | 108098 | Med21    | 0610007L0  |
| chr19 | 21799577 | 21799975 | Intergenic | RCHARR1 I  | -53054 | NM_00103 | 83921  | Tmem2    | -          |
| chr6  | 1.37E+08 | 1.37E+08 | exon (NM_  | exon (NM_  | 2962   | NM_17877 | 320135 | BC049715 | -          |
| chr13 | 22073427 | 22073625 | exon (NM_  | exon (NM_  | 463    | NM_00116 | 195236 | Pom121I2 | Gm24       |
| chr1  | 1.33E+08 | 1.33E+08 | promoter-1 | promoter-1 | -421   | NM_01875 | 54354  | Rassf5   | 1300019G2  |
| chr5  | 3491877  | 3492125  | intron (NM | intron (NM | -51832 | NM_00104 | 68152  | Fam133b  | 2900022KC  |
| chr17 | 71606152 | 71606500 | intron (NM | intron (NM | 52332  | NM_00116 | 64898  | Lpin2    | 2610511GC  |
| chr16 | 56037677 | 56037925 | promoter-1 | promoter-1 | 86     | NM_02909 | 52575  | Trmt10c  | 1300018J1  |
| chr1  | 94077152 | 94077350 | Intergenic | CpG        | -32281 | NM_20722 | 208727 | Hdac4    | 4932408F1  |
| chr5  | 32438477 | 32438675 | promoter-1 | promoter-1 | -269   | NM_00803 | 14284  | Fosl2    | Fra-2      |
| chr7  | 1.26E+08 | 1.26E+08 | exon (NM_  | exon (NM_  | 101    | NM_01958 | 56209  | Gde1     | 1200003M   |
| chr11 | 1.15E+08 | 1.15E+08 | intron (NM | CpG        | 171    | NM_02672 | 68572  | Ict1     | 1110001AC  |
| chr10 | 31177427 | 31177550 | Intergenic | Intergenic | -11761 | NM_00941 | 21987  | Tpd52I1  | D53        |
| chr2  | 1.31E+08 | 1.31E+08 | Intergenic | ORR1E LTF  | -67985 | NM_00117 | 228608 | Smox     | B130066HC  |
| chr17 | 30985852 | 30986050 | intron (NM | intron (NM | -52861 | NM_02133 | 14652  | Glp1r    | GLP-1R GL  |
| chr3  | 1.26E+08 | 1.26E+08 | promoter-1 | promoter-1 | -418   | NM_00129 | 108058 | Camk2d   | 2810011D2  |
| chr13 | 56030327 | 56030400 | Intergenic | Intergenic | -97577 | NM_01109 | 18740  | Pitx1    | Bft P-OTX  |
| chr6  | 1.38E+08 | 1.38E+08 | promoter-1 | promoter-1 | -165   | NM_01149 | 20901  | Strap    | AW557906   |
| chr12 | 1.19E+08 | 1.19E+08 | intron (NM | intron (NM | 429    | NM_14604 | 217946 | Cdca7I   | BC006933   |
| chr2  | 93850627 | 93851000 | promoter-1 | promoter-1 | 74     | NM_02694 | 69113  | Alkbh3   | 1700108HC  |
| chr9  | 70381152 | 70381450 | Intergenic | L1ME3A LI  | -9284  | NM_02633 | 66660  | Sltm     | 5730455CC  |
| chr4  | 55362527 | 55362675 | promoter-1 | promoter-1 | -313   | NM_00901 | 19359  | Rad23b   | 0610007D1  |
| chr6  | 52590027 | 52590200 | intron (NM | CpG        | 181    | NM_14556 | 58875  | Hibadh   | 6430402H1  |
| chr7  | 97631127 | 97631200 | Intergenic | Intergenic | -6658  | NM_02673 | 68472  | Tmem126t | 1110001A2  |
| chr3  | 51464852 | 51465150 | promoter-1 | promoter-1 | -114   | NM_17499 | 211666 | Mgst2    | GST2 MGS   |
| chr5  | 1.37E+08 | 1.37E+08 | Intergenic | Intergenic | -51090 | NM_02161 | 59310  | Myl10    | 170002710f |
| chr7  | 1.09E+08 | 1.09E+08 | 5' UTR (NM | 5' UTR (NM | 140    | NM_00104 | 69710  | Arap1    | 2410002L1  |
| chr18 | 34330227 | 34330300 | Intergenic | RLTR11B L  | -50375 | NM_00746 | 11789  | Apc      | AI047805 , |
| chr13 | 5872927  | 5873200  | Intergenic | Intergenic | 12328  | NM_01180 | 23849  | Klf6     | AI448727 I |
| chr4  | 1.32E+08 | 1.32E+08 | intron (NM | intron (NM | 711    | NM_00751 | 11983  | Atpif1   | Atpi lf1   |
| chr11 | 70920052 | 70920175 | intron (NM | intron (NM | 38093  | NM_00100 | 195046 | Nlrp1a   | CARD7 DEI  |
| chr5  | 1.37E+08 | 1.37E+08 | intron (NM | CpG        | 177    | NM_01129 | 20022  | Polr2j   | 14.5kDa Po |
| chr6  | 72294802 | 72295375 | promoter-1 | promoter-1 | 81     | NM_13859 | 28035  | Usp39    | AA408960   |
| chr1  | 1.35E+08 | 1.35E+08 | Intergenic | Intergenic | -11430 | NM_13381 | 108954 | Ppp1r15b | 1810033K1  |
| chr6  | 71858427 | 71858800 | promoter-1 | promoter-1 | 143    | NM_02727 | 69956  | Ptcd3    | 2610034F1  |
| chr15 | 57808377 | 57808450 | Intergenic | ORR1C2 LI  | -9045  | NM_17386 | 239463 | Fam83a   | -          |
| chr12 | 1.12E+08 | 1.12E+08 | intron (NM | intron (NM | 1320   | NM_01163 | 22031  | Traf3    | AI528849 I |
| chr16 | 32541577 | 32541850 | Intergenic | MLT1C LTF  | 45346  | NM_19930 | 245308 | Zdhhc19  | Gm1744 G   |
| chr10 | 1.28E+08 | 1.28E+08 | promoter-1 | promoter-1 | -848   | NM_03125 | 83430  | Il23a    | IL-23 p19  |
| chr10 | 1.27E+08 | 1.27E+08 | intron (NM | B3 SINE B  | 849    | NM_00125 | 108037 | Shmt2    | 2700043DC  |
| chr8  | 80041402 | 80041625 | non-coding | non-coding | 293    | NM_03011 | 78514  | Arhgap10 | A930033BC  |
| chr17 | 31176027 | 31176100 | Intergenic | Intergenic | -18576 | NM_00959 | 11307  | Abcg1    | AW413978   |
| chr6  | 1.29E+08 | 1.29E+08 | promoter-1 | promoter-1 | -124   | NM_17768 | 232413 | Clec12a  | CLL-1 D23C |
| chr13 | 67229402 | 67229475 | intron (NM | intron (NM | 274    | NM_17239 | 268670 | Zfp759   | BC028265   |
| chr7  | 1.09E+08 | 1.09E+08 | intron (NM | MIRc SINE  | 7519   | NM_01956 | 56212  | Rhog     | 2810426GC  |
| chr17 | 24986702 | 24986825 | promoter-1 | promoter-1 | 484    | NM_02348 | 68636  | Fahd1    | 1110025H1  |
| chr17 | 17511602 | 17511725 | intron (NM | intron (NM | 367    | NM_02593 | 67045  | Riok2    | 2010110K2  |

|       |          |          |             |            |        |          |        |          |            |
|-------|----------|----------|-------------|------------|--------|----------|--------|----------|------------|
| chr10 | 1.17E+08 | 1.17E+08 | Intergenic  | MTE2b LTI  | -35847 | NM_00101 | 432508 | Cpsf6    | 4733401N1  |
| chr6  | 1.08E+08 | 1.08E+08 | intron (NM  | intron (NM | 113811 | NM_01058 | 16438  | Itpr1    | D6Pas2 EN  |
| chr11 | 1.03E+08 | 1.03E+08 | Intergenic  | Intergenic | -24073 | NM_18303 | 353047 | Plekhn1  | AP162 B2   |
| chr13 | 85428552 | 85428650 | 5' UTR (NM  | 5' UTR (NM | 490    | NM_14545 | 218397 | Rasa1    | Gap RasG/  |
| chr5  | 1.22E+08 | 1.22E+08 | promoter-1  | promoter-1 | -378   | NM_17272 | 231713 | Naa25    | 4833422K1  |
| chr11 | 95639302 | 95639400 | Intergenic  | MLT1F1 LT  | 28970  | NM_20160 | 268469 | Zfp652   | 9530033F2  |
| chr1  | 1.37E+08 | 1.37E+08 | Intergenic  | Intergenic | -8631  | NM_17343 | 215690 | Nav1     | 9530089B1  |
| chr4  | 59451402 | 59451750 | promoter-1  | promoter-1 | -71    | NM_00116 | 634731 | Susd1    | A530080P1  |
| chr2  | 68663602 | 68663825 | Intergenic  | Intergenic | -35901 | NM_17285 | 241447 | Cers6    | 4732462CC  |
| chr15 | 81842527 | 81842700 | intron (NM  | intron (NM | 3957   | NM_13409 | 28075  | Desi1    | AI427858 , |
| chr2  | 1.78E+08 | 1.78E+08 | 5' UTR (NM  | 5' UTR (NM | 2137   | NM_00108 | 71532  | Fam217b  | 9030418KC  |
| chr7  | 1.06E+08 | 1.06E+08 | intron (NM  | intron (NM | 40198  | NM_00982 | 12406  | Serpinh1 | BERF-1 Cb  |
| chr3  | 94247302 | 94247375 | promoter-1  | promoter-1 | 80     | NM_03011 | 78523  | Mrpl9    | 8030480E2  |
| chr5  | 23949752 | 23949875 | exon (NM_   | exon (NM_  | 1240   | NM_02322 | 66587  | Fastk    | 0610011KC  |
| chr18 | 76400752 | 76401025 | promoter-1  | promoter-1 | -467   | NM_01075 | 17126  | Smad2    | 7120426M   |
| chr12 | 1.01E+08 | 1.01E+08 | intron (NM  | intron (NM | 8726   | NM_03017 | 78767  | Efcab11  | 2610021K2  |
| chr12 | 40878927 | 40879075 | Intergenic  | Intergenic | -18186 | NM_00114 | 20259  | Scin     | AW545522   |
| chr1  | 1.87E+08 | 1.87E+08 | intron (NM  | intron (NM | 2491   | NM_00129 | 66112  | 1-Mar    | 1300013F1  |
| chr17 | 5402377  | 5402925  | Intergenic  | Intergenic | 16116  | NM_17534 | 106557 | Ldhal6b  | 4933402O1  |
| chr1  | 1.73E+08 | 1.73E+08 | Intergenic  | (TA)n Simf | -1825  | NM_17706 | 320078 | Olfml2b  | 1110018NC  |
| chr17 | 66425802 | 66425875 | intron (NM  | CpG        | 548    | NM_00102 | 106585 | Ankrd12  | 2900001A1  |
| chr13 | 95128952 | 95129175 | promoter-1  | promoter-1 | 148    | NM_00968 | 11774  | Ap3b1    | AP-3 AU01  |
| chr10 | 80958252 | 80958500 | intron (NM  | intron (NM | 732    | NM_13400 | 103425 | Ncln     | 3100002P1  |
| chr6  | 29718552 | 29718650 | exon (NM_   | exon (NM_  | 158    | NM_00117 | 74340  | Ahcyl2   | 4631427C1  |
| chr5  | 1.37E+08 | 1.37E+08 | Intergenic  | L1MB5 LIN  | -14964 | NM_02577 | 66801  | Prkrip1  | 8430424D2  |
| chr4  | 1.35E+08 | 1.35E+08 | promoter-1  | promoter-1 | -506   | NM_02298 | 53902  | Rcan3    | AU041093   |
| chr17 | 29631427 | 29631575 | intron (NM  | intron (NM | 3511   | NM_00884 | 18712  | Pim1     | Pim-1      |
| chr13 | 30076577 | 30078175 | exon (NM_   | exon (NM_  | 556    | NM_01009 | 13557  | E2f3     | E2F3b E2f3 |
| chr16 | 32180027 | 32180325 | intron (NM  | B2_Mm2 S   | 290    | NM_00103 | 328660 | Bex6     | B020003OC  |
| chr9  | 1.05E+08 | 1.05E+08 | Intergenic  | PB1D10 SI  | -26951 | NM_00125 | 235574 | Atp2c1   | 1700121J1  |
| chr7  | 16705152 | 16705275 | promoter-1  | promoter-1 | -12    | NM_13372 | 70394  | Kptn     | 2310042D1  |
| chr1  | 18297427 | 18297675 | Intergenic  | Intergenic | -42332 | NM_00104 | 654464 | Gm15386  | BD-17 Def  |
| chr7  | 1.08E+08 | 1.08E+08 | intron (NR_ | CpG        | 243    | NM_19883 | 52443  | Mrpl48   | 1810030E2  |
| chr3  | 90052677 | 90052750 | intron (NM  | intron (NM | 599    | NM_01390 | 30791  | Slc39a1  | Zip1 Zirtl |
| chr13 | 1.01E+08 | 1.01E+08 | intron (NM  | intron (NM | 28091  | NM_01142 | 20595  | Smn1     | AI849087 C |
| chr5  | 20917102 | 20917475 | intron (NM  | intron (NM | 13207  | NM_02919 | 75172  | Ccdc146  | 4930528GC  |
| chr1  | 1.93E+08 | 1.93E+08 | promoter-1  | promoter-1 | 49     | NM_00749 | 11910  | Atf3     | LRG-21     |
| chr6  | 1.47E+08 | 1.47E+08 | promoter-1  | promoter-1 | 45     | NM_02591 | 67015  | Ccdc91   | 1700086GC  |
| chr2  | 23011827 | 23012025 | promoter-1  | promoter-1 | -99    | NM_01377 | 27377  | Yme1l1   | FtsH1 Ftsh |
| chr1  | 94830677 | 94830825 | promoter-1  | promoter-1 | -234   | NM_01179 | 23830  | Capn10   | AW049679   |
| chr11 | 1.04E+08 | 1.04E+08 | intron (NM  | CpG        | 159    | NM_01171 | 22412  | Wnt9b    | Wnt14b W   |
| chr11 | 1.04E+08 | 1.04E+08 | promoter-1  | promoter-1 | -346   | NM_00108 | 76719  | Kansl1   | 1700081L1  |
| chr4  | 14792077 | 14792225 | intron (NM  | intron (NM | 785    | NM_02826 | 72519  | Tmem55a  | 2610319KC  |
| chr5  | 1.51E+08 | 1.51E+08 | intron (NM  | CpG        | 411    | NM_17531 | 100710 | Pds5b    | AI646570 , |
| chr11 | 1.07E+08 | 1.07E+08 | Intergenic  | L1MB7 LIN  | -27073 | NM_19829 | 78455  | Helz     | 3110078M   |
| chr1  | 21950402 | 21950675 | intron (NM  | intron (NM | 1485   | NM_00116 | 226922 | Kcnq5    | 7730402H1  |
| chr9  | 89971027 | 89971200 | TTS (NM_0   | TTS (NM_0  | 22008  | NM_00780 | 13036  | Ctsh     | AL022844   |

|       |          |          |                        |         |           |        |           |            |
|-------|----------|----------|------------------------|---------|-----------|--------|-----------|------------|
| chr1  | 1.22E+08 | 1.22E+08 | promoter-1promoter-1   | -140    | NM_01993  | 19258  | Ptpn4     | PTPMEG P   |
| chr2  | 1.64E+08 | 1.64E+08 | intron (NM intron (NM  | -6693   | NM_00903  | 19668  | Rbpjl     | RBP-L Rbp  |
| chr10 | 12255202 | 12255425 | intron (NM MIRb SINE   | 326220  | NM_01168  | 22288  | Utrn      | AA589569   |
| chr19 | 3882702  | 3882875  | intron (NR_intron (NR_ | 22442   | NM_01692  | 27060  | Tcrg1     | ATP6N1C /  |
| chr4  | 1.37E+08 | 1.37E+08 | Intergenic ID_B1 SINI  | -14577  | NM_00124  | 12540  | Cdc42     | AI747189 , |
| chr2  | 1.67E+08 | 1.67E+08 | Intergenic Intergenic  | -22116  | NM_02381  | 76367  | Trp53rk   | 2810408M   |
| chr7  | 1.4E+08  | 1.4E+08  | intron (NM intron (NM  | 8303    | NM_00998  | 13017  | Ctbp2     | AA407280   |
| chr2  | 1.4E+08  | 1.4E+08  | promoter-1promoter-1   | -135    | NR_11035: | 75812  | Tasp1     | 4930485DC  |
| chr9  | 1.11E+08 | 1.11E+08 | intron (NM intron (NM  | 7650    | NM_00114  | 235633 | Als2cl    | 79H19D 79  |
| chr2  | 32702402 | 32702475 | intron (NM intron (NM  | 314     | NM_00929  | 20910  | Stxbp1    | AI317162 , |
| chr19 | 45857577 | 45857675 | 5' UTR (NM 5' UTR (NM  | 155     | NM_02379  | 76055  | Mgea5     | 2810009A2  |
| chr17 | 29104077 | 29104300 | 3' UTR (NM 3' UTR (NM  | 14027   | NM_02588  | 66989  | Kctd20    | 2410004N1  |
| chr13 | 1.09E+08 | 1.09E+08 | promoter-1promoter-1   | -297    | NM_02900  | 74559  | Elovl7    | 9130013K2  |
| chr4  | 84332002 | 84332125 | Intergenic Intergenic  | -11073  | NM_17287  | 242509 | Bnc2      | 5031434M   |
| chr9  | 22030127 | 22030350 | promoter-1promoter-1   | 82      | NM_00116  | 235047 | Zfp809    | BB114266   |
| chr2  | 5693677  | 5693800  | Intergenic Intergenic  | -57930  | NM_17734  | 227541 | Camk1d    | A630059D:  |
| chr7  | 1.17E+08 | 1.17E+08 | intron (NM B1_Mur2 :   | 2196    | NM_00930  | 20947  | Swap70    | 70kDa AV2  |
| chr1  | 1.57E+08 | 1.57E+08 | Intergenic Intergenic  | -58939  | NM_01127  | 19775  | Xpr1      | Rmc-1 Rm   |
| chr11 | 1.18E+08 | 1.18E+08 | promoter-1promoter-1   | -591    | NM_14543  | 217353 | Tmc6      | D11Erd20:  |
| chr2  | 75523627 | 75523825 | intron (NM intron (NM  | 18972   | NM_01090  | 18024  | Nfe2l2    | AI194320   |
| chr12 | 28348102 | 28348250 | Intergenic Intergenic  | -320593 | NM_00923  | 20666  | Sox11     | 1110038HC  |
| chr1  | 99667652 | 99667825 | intron (NM intron (NM  | 982     | NM_02625  | 252876 | Gin1      | 4930429M   |
| chr2  | 1.45E+08 | 1.45E+08 | Intergenic Intergenic  | 193474  | NM_02549  | 66328  | Scp2d1    | 1700010M   |
| chr11 | 22743377 | 22743625 | intron (NM intron (NM  | 16234   | NM_01688  | 53625  | B3gnt2    | AA408337   |
| chr4  | 1.35E+08 | 1.35E+08 | promoter-1promoter-1   | 7       | NM_02298  | 53902  | Rcan3     | AU041093   |
| chr10 | 18782402 | 18782600 | Intergenic Intergenic  | -47285  | NM_00939  | 21929  | Tnfaip3   | A20 Tnfip3 |
| chr1  | 54495727 | 54495925 | promoter-1promoter-1   | -11     | NM_00103  | 98488  | Gtf3c3    | AL022818   |
| chr12 | 25516627 | 25516725 | intron (NM CpG         | 212     | NM_00108  | 67216  | Mboat2    | 2810049GC  |
| chr16 | 57132502 | 57132750 | intron (NM intron (NM  | 10799   | NM_13859  | 28185  | Tomm70a   | 2610044B2  |
| chr16 | 33267752 | 33267900 | intron (NM MTC LTR I   | 16284   | NM_08055  | 69150  | Snx4      | 1810036H1  |
| chr11 | 54846727 | 54846875 | intron (NM CpG         | 172     | NM_00111  | 11749  | Anxa6     | AW107198   |
| chr16 | 16305202 | 16305275 | intron (NR_intron (NR_ | 2180    | NM_19824  | 70120  | Yars2     | 2210023C1  |
| chr10 | 19462627 | 19463050 | exon (NM_exon (NM_     | 30445   | NM_17278  | 237313 | Il20ra    | E230031K1  |
| chr14 | 50681952 | 50682275 | Intergenic CpG         | 22241   | NM_14631  | 258313 | Olfr726   | MOR246-4   |
| chr2  | 52777252 | 52777425 | intron (NM intron (NM  | 60436   | NM_17240  | 71409  | Fmnl2     | 5430425KC  |
| chr3  | 1.21E+08 | 1.21E+08 | Intergenic Intergenic  | -1979   | NM_01017  | 14066  | F3        | AA409063   |
| chr17 | 27760477 | 27760725 | promoter-1promoter-1   | -204    | NM_01983  | 56409  | Nudt3     | 1110011BC  |
| chr6  | 1.22E+08 | 1.22E+08 | Intergenic Intergenic  | -3977   | NM_01074  | 17113  | M6pr      | CD-MPR V   |
| chr19 | 57685477 | 57685550 | promoter-1promoter-1   | -11     | NM_18141  | 226255 | Atrnl1    | AI504415 , |
| chr13 | 23685327 | 23685400 | intron (NM intron (NM  | -7524   | NM_00129  | 319179 | Hist1h2be | -          |
| chr16 | 30596402 | 30596550 | Intergenic Intergenic  | -3333   | NM_17763  | 224093 | Fam43a    | Tuf1       |
| chr3  | 1.28E+08 | 1.28E+08 | intron (NM intron (NM  | 1228    | NM_02748  | 70617  | 5730508BC | 2700063A1  |
| chr19 | 8971927  | 8972250  | promoter-1promoter-1   | -459    | NM_00129  | 14376  | Ganab     | AU042638   |
| chr15 | 59485427 | 59485550 | intron (NM intron (NM  | 5279    | NM_14454  | 211770 | Trib1     | A5300900:  |
| chr14 | 80384752 | 80385325 | Intergenic Intergenic  | -15071  | NM_00103  | 380924 | Olfm4     | GC1 GW11   |
| chr3  | 62291977 | 62292075 | intron (NM intron (NM  | 18884   | NM_02813  | 72162  | Dhx36     | 2810407E2  |
| chr1  | 1.66E+08 | 1.66E+08 | promoter-1promoter-1   | 714     | NM_00116  | 66352  | Blzf1     | 1700030GC  |

|       |          |          |                        |        |          |        |           |            |
|-------|----------|----------|------------------------|--------|----------|--------|-----------|------------|
| chr18 | 24629377 | 24629525 | promoter-1promoter-1   | 79     | NM_02652 | 68046  | 2700062CC | AI195775 I |
| chr5  | 1.24E+08 | 1.24E+08 | intron (NM URR1B DN    | 4131   | NM_17787 | 330192 | Vps37b    | 2300007F2  |
| chr18 | 13071877 | 13072125 | intron (NM intron (NM  | 28349  | NM_20753 | 64291  | Osbpl1a   | G430090F1  |
| chr4  | 1.36E+08 | 1.36E+08 | Intergenic ID4 SINE I  | -7112  | NM_01373 | 27224  | Tceb3     | 110kDa A/  |
| chr2  | 1.64E+08 | 1.64E+08 | Intergenic Intergenic  | -2947  | NM_00111 | 381404 | Pabpc1l   | 1810053BC  |
| chr2  | 1.64E+08 | 1.64E+08 | intron (NM CpG         | 262    | NM_00739 | 11486  | Ada       | -          |
| chr6  | 1E+08    | 1E+08    | Intergenic Intergenic  | -48186 | NM_01974 | 56353  | Rybp      | 2410018J2  |
| chr8  | 72346302 | 72346375 | promoter-1promoter-1   | -126   | NM_02002 | 53978  | Lpar2     | Edg4 IPA2  |
| chr12 | 31595977 | 31596100 | promoter-1promoter-1   | 439    | NM_02133 | 11431  | Acp1      | 4632432E0  |
| chr7  | 1.33E+08 | 1.33E+08 | intron (NM intron (NM  | -52651 | NM_00110 | 269994 | Gsg1l     | AI852434 I |
| chr7  | 71078377 | 71078550 | intron (NM intron (NM  | 5338   | NM_02136 | 50794  | Klf13     | 0610043C1  |
| chr5  | 67651927 | 67652025 | 5' UTR (NV 5' UTR (NV  | 172    | NM_03010 | 67878  | Tmem33    | 1110006G0  |
| chr16 | 20357852 | 20358225 | intron (NM intron (NM  | -32561 | NM_18315 | 224044 | Cyp2ab1   | EG224044   |
| chr10 | 4540227  | 4540300  | promoter-1promoter-1   | -813   | NM_02599 | 67141  | Fbxo5     | 25100441I0 |
| chr9  | 43172627 | 43172725 | Intergenic Intergenic  | 53830  | NM_02365 | 72169  | Trim29    | 1110047J2  |
| chr1  | 1.34E+08 | 1.34E+08 | exon (NM exon (NM_     | -8206  | NM_02902 | 74626  | Tmem81    | 493042902  |
| chr3  | 87689227 | 87689425 | 5' UTR (NV 5' UTR (NV  | 158    | NM_03357 | 94315  | Prcc      | -          |
| chr8  | 67356552 | 67356850 | intron (NM intron (NM  | 17121  | NM_17863 | 77113  | Klhl2     | 6030411N2  |
| chr17 | 27770477 | 27770675 | intron (NM intron (NM  | 1611   | NM_02596 | 67097  | Rps10     | 2210402AC  |
| chr13 | 75931802 | 75932000 | Intergenic Intergenic  | -45433 | NM_05310 | 93692  | Glrx      | C86710 D1  |
| chr8  | 90169652 | 90169750 | Intergenic Intergenic  | 81895  | NM_17790 | 330820 | 4933402J0 | -          |
| chr9  | 43896227 | 43896325 | intron (NM intron (NM  | 3273   | NM_19809 | 53376  | Usp2      | B930035K2  |
| chr9  | 99464102 | 99464325 | intron (NM intron (NM  | 5105   | NM_00116 | 74125  | Armc8     | 1200015K2  |
| chr7  | 29062977 | 29063300 | exon (NM exon (NM_     | 413    | NM_00117 | 434156 | Eid2b     | 3010005CC  |
| chr7  | 78608477 | 78608775 | Intergenic Intergenic  | 842855 | NM_00102 | 244049 | Mctp2     | Gm489      |
| chr10 | 42432877 | 42432975 | Intergenic RLTR24 LT   | 34204  | NM_17241 | 14628  | Ostm1     | 1200002H1  |
| chr2  | 1.02E+08 | 1.02E+08 | promoter-1promoter-1   | -381   | NM_02963 | 76501  | CommD9    | 1810029F0  |
| chr17 | 71966302 | 71966500 | intron (NM intron (NM  | 846    | NM_17563 | 72515  | Wdr43     | 2610318G0  |
| chr8  | 1.08E+08 | 1.08E+08 | TTS (NM_1 TTS (NM_1    | 152    | NM_00116 | 74356  | 4931428F0 | AI426165 I |
| chr9  | 43999227 | 43999625 | intron (NM Charlie1a I | 42703  | NM_00761 | 12402  | Cbl       | 4732447J0  |
| chr18 | 46900627 | 46900725 | promoter-1promoter-1   | 557    | NM_02621 | 67526  | Atg12     | 4931423H1  |
| chr17 | 74843102 | 74843200 | intron (NM MTA_Mm      | 15297  | NM_00103 | 268973 | Nlrc4     | 9530011P1  |
| chr11 | 1.21E+08 | 1.21E+08 | promoter-1promoter-1   | -16    | NM_15354 | 217366 | Lrrc45    | BC023296   |
| chr11 | 48984177 | 48984325 | intron (NM intron (NM  | 10733  | NM_14627 | 258273 | Olfr1394  | MOR280-1   |
| chr5  | 1.06E+08 | 1.06E+08 | intron (NM intron (NM  | 39136  | NM_13389 | 100604 | Lrrc8c    | AD158 AI3  |
| chr6  | 1.21E+08 | 1.21E+08 | intron (NM intron (NM  | 7778   | NM_02873 | 74043  | Pex26     | 4632428M   |
| chr8  | 1.09E+08 | 1.09E+08 | promoter-1promoter-1   | 63     | NM_17879 | 330836 | Slc7a6    | AI643885 I |
| chr12 | 72236452 | 72236575 | intron (NM intron (NM  | 1149   | NM_00102 | 30056  | Timm9     | 2810011L1  |
| chr11 | 76030802 | 76030950 | promoter-1promoter-1   | 198    | NM_17736 | 276919 | Gemin4    | 4932415L0  |
| chr1  | 26319927 | 26320075 | Intergenic RLTR6_Mr    | 424304 | NM_00103 | 210940 | 4931408C2 | -          |
| chr16 | 64934727 | 64934850 | intron (NM MLT1A1 L    | 82877  | NM_17864 | 106143 | Cggbp1    | AA960172   |
| chr5  | 1.24E+08 | 1.24E+08 | Intergenic Intergenic  | 33037  | NM_03070 | 80885  | Hcar2     | Gpr109a G  |
| chr13 | 1.03E+08 | 1.03E+08 | Intergenic B4A SINE    | -28050 | NM_00853 | 17079  | Cd180     | F630107B1  |
| chr5  | 46235727 | 46236100 | intron (NM (CA)n Sim   | 11878  | NM_17215 | 209707 | Lcorl     | Mlr1       |
| chr10 | 84125002 | 84125200 | intron (NM intron (NM  | 39919  | NM_02742 | 70428  | Polr3b    | 2700078HC  |
| chr15 | 96573677 | 96574075 | Intergenic Intergenic  | -43747 | NM_17512 | 67760  | Slc38a2   | 5033402L1  |
| chr1  | 34521252 | 34521375 | intron (NM L1MB8 LIN   | 4722   | NM_01120 | 19253  | Ptpn18    | FLP1 HSCF  |



|       |          |          |            |            |        |          |        |          |           |
|-------|----------|----------|------------|------------|--------|----------|--------|----------|-----------|
| chr4  | 1.3E+08  | 1.3E+08  | promoter-1 | promoter-1 | 27     | NM_01068 | 16792  | Laptm5   | E3        |
| chr5  | 44193002 | 44193325 | Intergenic | Intergenic | -16969 | NM_00976 | 12182  | Bst1     | 114/A10 A |
| chr4  | 45543002 | 45543400 | 5' UTR (NM | 5' UTR (NM | 499    | NM_00103 | 230126 | Shb      | BC028832  |
| chr2  | 1.8E+08  | 1.8E+08  | intron (NM | intron (NM | 557    | NM_14585 | 252966 | Cables2  | ik3-2     |
| chr17 | 26839502 | 26839600 | Intergenic | Intergenic | -13044 | NM_02987 | 77128  | Crebrf   | A930001N  |
| chr2  | 1.4E+08  | 1.4E+08  | non-coding | non-coding | 303    | NM_00115 | 75812  | Tasp1    | 4930485D  |
| chr1  | 53830002 | 53830125 | intron (NM | intron (NM | 11996  | NM_13381 | 98267  | Stk17b   | 3110009A  |
| chr15 | 41615702 | 41615925 | intron (NM | intron (NM | -4767  | NM_00113 | 170719 | Oxr1     | 2210416C  |
| chr7  | 71156777 | 71157025 | Intergenic | Intergenic | -73100 | NM_02136 | 50794  | Klf13    | 0610043C  |
| chr18 | 9957977  | 9958375  | promoter-1 | promoter-1 | -2     | NM_15355 | 225160 | Thoc1    | 3110002N  |
| chr5  | 1.15E+08 | 1.15E+08 | intron (NM | intron (NM | 9677   | NM_02671 | 68420  | Ankrd13a | 1100001D  |
| chr3  | 14871627 | 14871775 | 3' UTR (NV | 3' UTR (NV | 8163   | NM_00760 | 12350  | Car3     | BB219044  |
| chr11 | 54299677 | 54299900 | intron (NM | intron (NM | -36559 | NM_00125 | 192786 | Rapgef6  | A530068K  |
| chr1  | 9690452  | 9690550  | promoter-1 | promoter-1 | -211   | NM_00865 | 17864  | Mybl1    | A-myb G1- |
| chr15 | 37931027 | 37931100 | intron (NM | intron (NM | -40253 | NM_19947 | 382985 | Rrm2b    | p53R2     |
| chr10 | 20818277 | 20818425 | Intergenic | MT2B LTR   | 57725  | NM_00117 | 52906  | Ahi1     | 1700015F  |
| chr1  | 1.62E+08 | 1.62E+08 | intron (NM | intron (NM | 622    | NM_00978 | 12301  | Cacybp   | SIP       |
| chr1  | 1.93E+08 | 1.93E+08 | Intergenic | Intergenic | 13070  | NM_03006 | 381319 | Batf3    | 91302110: |
| chr7  | 1.33E+08 | 1.33E+08 | Intergenic | Intergenic | -35820 | NM_14558 | 104175 | Sbk1     | Sbk       |
| chr12 | 76771052 | 76771175 | promoter-1 | promoter-1 | -589   | NM_02820 | 72338  | Wdr89    | 2600001A  |
| chr1  | 1.66E+08 | 1.66E+08 | promoter-1 | promoter-1 | 211    | NM_20136 | 381306 | BC055324 | -         |
| chr16 | 70297927 | 70298050 | Intergenic | MTA_Mm     | -16206 | NM_02880 | 74185  | Gbe1     | 2310045H  |
| chr11 | 22274377 | 22274700 | Intergenic | Intergenic | -87740 | NM_00125 | 216565 | Ehbp1    | AF424697  |
| chr1  | 1.74E+08 | 1.74E+08 | intron (NM | intron (NM | 9960   | NM_01348 | 12523  | Cd84     | A130013D: |
| chr19 | 37282402 | 37282525 | promoter-1 | promoter-1 | 428    | NM_00116 | 69104  | 5-Mar    | 1810015H  |
| chr3  | 1.52E+08 | 1.52E+08 | intron (NM | Lx8 LINE L | 49249  | NM_02566 | 329777 | Pigk     | 3000001O  |
| chr11 | 87861277 | 87861675 | exon (NM_  | exon (NM_  | 601    | NM_17337 | 110809 | Srsf1    | 1110054N  |
| chr3  | 19347802 | 19348100 | Intergenic | Intergenic | -60644 | NM_00116 | 66326  | Dnajc5b  | 1700008A  |
| chr5  | 1.43E+08 | 1.43E+08 | intron (NM | intron (NM | -21922 | NM_17272 | 231855 | Ap5z1    | C330006K  |
| chr6  | 1.18E+08 | 1.18E+08 | promoter-1 | intron (NM | -196   | NM_00116 | 98758  | Hnrnpf   | 4833420I  |
| chr3  | 74708302 | 74708450 | Intergenic | RMER20B    | 239269 | NM_17251 | 213234 | Zbbx     | 4931432L  |
| chr1  | 95700552 | 95700775 | intron (NM | CpG        | 121    | NM_02545 | 66262  | Ing5     | 1700001C  |
| chr8  | 1.26E+08 | 1.26E+08 | intron (NM | RLTR22_M   | 26043  | NM_02049 | 57247  | Zfp276   | AW048709  |
| chr3  | 69120777 | 69121150 | 5' UTR (NV | 5' UTR (NV | 123    | NM_17872 | 242083 | Ppm1l    | 3222401G  |
| chr18 | 65591002 | 65591200 | intron (NM | CpG        | 450    | NM_17283 | 240354 | Malt1    | A630046N: |
| chr7  | 87163552 | 87163650 | Intergenic | Intergenic | -6099  | NM_00114 | 209225 | Zfp710   | 5430400N  |
| chr10 | 20735077 | 20735375 | intron (NM | intron (NM | -25400 | NM_00117 | 52906  | Ahi1     | 1700015F  |
| chr18 | 69752252 | 69752350 | intron (NM | intron (NM | 246926 | NM_00108 | 21413  | Tcf4     | 5730422P  |
| chr2  | 1.72E+08 | 1.72E+08 | Intergenic | Intergenic | 34185  | NM_00115 | 21420  | Tfap2c   | AA409384  |
| chr14 | 60870327 | 60870600 | promoter-1 | promoter-1 | -248   | NM_17059 | 71844  | Nupl1    | 1700017F  |
| chr3  | 1.33E+08 | 1.33E+08 | intron (NM | Lx8 LINE L | 19377  | NM_02995 | 77669  | Arhgef38 | 9130221D: |
| chr6  | 1.14E+08 | 1.14E+08 | intron (NM | MER2 DNA   | -27755 | NM_00103 | 381801 | Tatdn2   | AI646012  |
| chr4  | 1.07E+08 | 1.07E+08 | Intergenic | Intergenic | -48777 | NM_02559 | 329910 | Acot11   | 1110020M  |
| chr8  | 1.08E+08 | 1.08E+08 | promoter-1 | promoter-1 | 37     | NM_02548 | 66320  | Tmem208  | 1700006C  |
| chr14 | 61831802 | 61831900 | intron (NM | intron (NM | 45476  | NM_01189 | 24053  | Sgcg     | 35kDa 543 |
| chr1  | 1.68E+08 | 1.68E+08 | 5' UTR (NV | 5' UTR (NV | 190    | NM_03024 | 27878  | Tada1    | 2900026B  |
| chr19 | 43598077 | 43598200 | intron (NM | intron (NM | 957    | NM_01032 | 14718  | Got1     | AI789014  |

|       |          |          |            |            |         |          |        |          |             |
|-------|----------|----------|------------|------------|---------|----------|--------|----------|-------------|
| chr1  | 1.85E+08 | 1.85E+08 | Intergenic | Intergenic | 449957  | NM_01692 | 53791  | Tlr5     | -           |
| chr2  | 25051127 | 25051325 | exon (NM_  | exon (NM_  | 1107    | NM_14611 | 227612 | Tor4a    | A830007P1   |
| chrX  | 9046452  | 9046525  | promoter-1 | promoter-1 | -38     | NM_00780 | 13058  | Cybb     | C88302 CC   |
| chr6  | 35449977 | 35450425 | Intergenic | L1MB4 LIN  | 39687   | NM_00809 | 14489  | Mtpn     | 5033418D1   |
| chr12 | 73037552 | 73037850 | intron (NM | intron (NM | 47171   | NM_00128 | 208846 | Daam1    | -           |
| chr1  | 1.84E+08 | 1.84E+08 | Intergenic | Intergenic | -15330  | NM_01205 | 27058  | Srp9     | 9kDa        |
| chr14 | 45511127 | 45511325 | Intergenic | Intergenic | -32176  | NM_00896 | 19214  | Ptgdr    | DP PGD      |
| chr16 | 16896927 | 16897075 | intron (NM | intron (NM | 439     | NM_17683 | 68606  | Ppm1f    | 1110021B1   |
| chr13 | 51747052 | 51747175 | promoter-1 | promoter-1 | 30      | NM_02927 | 75420  | Secisbp2 | 2210413NC   |
| chr4  | 1.01E+08 | 1.01E+08 | Intergenic | CpG        | -27964  | NM_14614 | 16451  | Jak1     | AA960307    |
| chr9  | 65049627 | 65049750 | Intergenic | Intergenic | -12809  | NM_17746 | 214424 | Parp16   | ARTD15 B    |
| chr10 | 90544902 | 90545025 | promoter-1 | promoter-1 | 525     | NM_00104 | 11783  | Apaf1    | 6230400I0   |
| chr19 | 54120752 | 54120900 | exon (NM_  | exon (NM_  | 1154    | NM_00741 | 11551  | Adra2a   | AW122659    |
| chr4  | 66005827 | 66006025 | intron (NM | intron (NM | 59591   | NM_01951 | 56079  | Astn2    | 1d8 Astn    |
| chr16 | 25948177 | 25948550 | Intergenic | Intergenic | 146361  | NM_00112 | 22061  | Trp63    | AI462811    |
| chr9  | 1.06E+08 | 1.06E+08 | Intergenic | Intergenic | -11078  | NM_02055 | 11655  | Alas1    | ALAS ALAS   |
| chr6  | 86960227 | 86960325 | intron (NM | intron (NM | 446     | NM_02004 | 56748  | Nfu1     | 0610006G1   |
| chr8  | 49195077 | 49195425 | promoter-1 | promoter-1 | -61     | NR_02775 | 320685 | Dctd     | 6030466NC   |
| chr1  | 1.09E+08 | 1.09E+08 | Intergenic | Lx8 LINE L | -7974   | NM_00117 | 18788  | Serpib2  | PAI-2 Plan  |
| chr1  | 65233327 | 65233425 | promoter-1 | promoter-1 | 117     | NM_01108 | 18711  | Pikfyve  | 5230400C1   |
| chr9  | 71981152 | 71981475 | Intergenic | Intergenic | -21687  | NM_00125 | 21406  | Tcf12    | A130037EC   |
| chr3  | 65762177 | 65762275 | promoter-1 | promoter-1 | -79     | NM_01993 | 56706  | Ccnl1    | 2610030E2   |
| chr15 | 36722902 | 36723050 | intron (NM | CpG        | 1317    | NM_01174 | 22631  | Ywhaz    | 11100131:   |
| chr1  | 72353777 | 72354025 | promoter-1 | promoter-1 | -94     | NM_00953 | 22596  | Xrcc5    | AI314015    |
| chr7  | 1.23E+08 | 1.23E+08 | intron (NM | intron (NM | 43887   | NM_01144 | 20679  | Sox6     | AI987981 :  |
| chr4  | 1.38E+08 | 1.38E+08 | 3' UTR (NM | 3' UTR (NM | -2590   | NM_00119 | 16559  | Kif17    | 5930435E0   |
| chr2  | 24790977 | 24791200 | promoter-1 | promoter-1 | -287    | NM_17840 | 215705 | Arrdc1   | AI957342    |
| chr14 | 75580602 | 75580850 | intron (NM | intron (NM | 44494   | NM_00887 | 18826  | Lcp1     | AW536232    |
| chr10 | 26819752 | 26820025 | intron (NM | Lx LINE L1 | 327570  | NM_17683 | 73910  | Arhgap18 | 4833419J0   |
| chr2  | 1.19E+08 | 1.19E+08 | intron (NM | CpG        | 314     | NM_02657 | 68142  | Ino80    | 2310079N1   |
| chr15 | 59313027 | 59313425 | intron (NM | intron (NM | 107473  | NM_00116 | 68501  | Nsmce2   | 1110014D1   |
| chr8  | 37311102 | 37311325 | intron (NM | CpG        | 1357    | NM_00108 | 244421 | Lonrf1   | -           |
| chr17 | 50432302 | 50432650 | intron (NM | CpG        | 469     | NM_01002 | 13164  | Dazl     | Daz-like Di |
| chr1  | 1.83E+08 | 1.83E+08 | intron (NM | intron (NM | 10251   | NM_03013 | 98417  | Cnih4    | AI647760 ,  |
| chr9  | 77956152 | 77956375 | promoter-1 | promoter-1 | 200     | NM_02360 | 71538  | Fbxo9    | 9030401P1   |
| chr3  | 89518927 | 89519450 | intron (NM | CpG        | 244     | NM_00103 | 56417  | Adar     | AV242451    |
| chr4  | 1.32E+08 | 1.32E+08 | Intergenic | Intergenic | -20084  | NM_00103 | 230787 | Themis2  | ICB-1       |
| chr9  | 56053427 | 56053550 | 3' UTR (NM | 3' UTR (NM | -44611  | NM_01979 | 56434  | Tspan3   | 1700055KC   |
| chr17 | 31791877 | 31791950 | intron (NM | intron (NM | 3786    | NM_02418 | 108121 | U2af1    | 2010107D1   |
| chr5  | 1.15E+08 | 1.15E+08 | intron (NM | B4 SINE B  | 29466   | NM_00100 | 433940 | Fam222a  | -           |
| chr4  | 70956652 | 70956800 | Intergenic | RMER16-in  | -760764 | NM_17269 | 230316 | Megf9    | 4933405H1   |
| chr4  | 1.34E+08 | 1.34E+08 | intron (NM | intron (NM | 5243    | NM_14555 | 100017 | Ldlrap1  | AA691260    |
| chr8  | 59989802 | 59990000 | promoter-1 | promoter-1 | -739    | NM_00825 | 97165  | Hmgb2    | C80539 HM   |
| chr11 | 1.21E+08 | 1.21E+08 | intron (NM | CpG        | 545     | NM_00103 | 80879  | Slc16a3  | Mct3 Mct4   |
| chr1  | 1.84E+08 | 1.84E+08 | Intergenic | Intergenic | -39256  | NM_13381 | 98386  | Lbr      | AI505894 i  |
| chr8  | 1.23E+08 | 1.23E+08 | Intergenic | Intergenic | -4826   | NM_00116 | 234797 | 6430548M | AW049007    |
| chr2  | 76198802 | 76198925 | promoter-1 | promoter-1 | -353    | NM_00998 | 13067  | Cyct     | T-Cc        |

|       |          |          |                         |          |           |        |                      |            |
|-------|----------|----------|-------------------------|----------|-----------|--------|----------------------|------------|
| chr7  | 1.18E+08 | 1.18E+08 | intron (NM CpG          | 518      | NM_00127  | 11717  | Ampd3                | -          |
| chr9  | 66060727 | 66060800 | intron (NM intron (NM   | 54730    | NM_01001  | 13143  | Dapk2                | -          |
| chr17 | 35138852 | 35139050 | intron (NM intron (NM   | 1099     | NM_01169  | 22321  | Vars                 | Bat6 D17H  |
| chr14 | 21872077 | 21872300 | promoter-1promoter-1    | 392      | NM_13407  | 11534  | Adk                  | 2310026J0  |
| chr1  | 36569352 | 36569450 | exon (NM_ exon (NM_     | 680      | NM_05318  | 94218  | Cnm3                 | Acdp3 Clp: |
| chr3  | 1.3E+08  | 1.3E+08  | intron (NM CpG          | 236      | NM_02550  | 66357  | Ostc                 | 2310008M   |
| chrX  | 33747577 | 33747675 | Intergenic Intergenic   | 11727    | NM_02832  | 72693  | Zcchc12              | 2810028AC  |
| chr5  | 1.23E+08 | 1.23E+08 | exon (NM_ exon (NM_     | 305      | NM_17542  | 109305 | Orai1                | D730049H0  |
| chr3  | 1.44E+08 | 1.44E+08 | intron (NM intron (NM   | 1379     | NM_01182  | 23908  | Hs2st1               | AW214369   |
| chr14 | 22632577 | 22632750 | Intergenic Intergenic   | -18120   | NM_01169  | 22334  | Vdac2                | Vdac6 mVl  |
| chr4  | 1.34E+08 | 1.34E+08 | Intergenic Intergenic   | -1775    | NM_00128  | 71904  | Paqr7                | 2310021M   |
| chr19 | 40969502 | 40969875 | TTS (NR_1C TTS (NR_1C   | 493      | NM_02831  | 72672  | Zfp518a              | 2810401C2  |
| chrX  | 35995152 | 35995275 | Intergenic MamGyp-i     | -6893    | NM_02155  | 59048  | C1galt1c1            | 150000211: |
| chr1  | 4839527  | 4839750  | Intergenic Intergenic   | -8137    | NM_00115  | 21399  | Tcea1                | S-II       |
| chr5  | 1.16E+08 | 1.16E+08 | intron (NM intron (NM   | 5841     | NM_01669  | 50849  | Rnf10                | AA675014   |
| chr1  | 1.39E+08 | 1.39E+08 | intron (NM (CGGGG)n     | 185      | NM_00116  | 226442 | Zfp281               | Znf281     |
| chr11 | 11461477 | 11461650 | Intergenic Intergenic   | 72294    | NM_02866  | 73862  | 4930415F1-           |            |
| chr7  | 4744102  | 4744325  | promoter-1promoter-1    | -354     | NM_00908  | 19943  | Rpl28                | D7Wsu21e   |
| chr15 | 92206602 | 92207100 | Intergenic Intergenic   | -20390   | NM_00116  | 239618 | Pdzn4                | 1110017DC  |
| chr12 | 8352327  | 8352475  | Intergenic Intergenic   | 32162    | NM_02142  | 58240  | Hs1bp3               | -          |
| chr13 | 49262877 | 49263000 | Intergenic L1MB7 LIN    | -19241   | NM_00129  | 75607  | Wnk2                 | 1810073PC  |
| chr5  | 33196552 | 33196800 | intron (NM intron (NM   | 203      | NM_19434  | 215476 | Prr14l               | 6030436E0  |
| chr1  | 67410352 | 67410850 | Intergenic MIRb SINE    | 241000   | NM_00108  | 227231 | Cps1                 | 4732433M   |
| chr6  | 91422877 | 91423350 | promoter-1promoter-1    | 304      | NM_13392  | 72170  | Chchd4               | 2410012P2  |
| chr7  | 1.34E+08 | 1.34E+08 | exon (NM_ exon (NM_     | 494      | NM_14452  | 68449  | Tbc1d10b             | 1110003P2  |
| chr13 | 47025577 | 47025925 | promoter-1promoter-1    | -664     | NM_01061  | 16553  | Kif13a               | 493050510: |
| chr17 | 56396102 | 56396175 | promoter-1promoter-1    | -78      | NM_01019  | 14154  | Fem1a                | AW611390   |
| chr15 | 89308752 | 89308875 | promoter-1promoter-1    | -958     | NM_00971  | 11883  | Arsa                 | AS-A ASA   |
| chr7  | 38974677 | 38974825 | intron (NM intron (NM   | 5945     | NM_02816  | 72244  | 1600014C1AI428873    |            |
| chr7  | 73849552 | 73849750 | intron (NR_ intron (NR_ | 14876    | NR_034030 | 72635  | Lins                 | 2700083BC  |
| chr3  | 51364602 | 51364775 | promoter-1promoter-1    | 57       | NM_08079  | 73251  | Setd7                | 1600028F2  |
| chr7  | 29592827 | 29592950 | Intergenic Intergenic   | -3021    | NM_17730  | 15388  | Hnrnp1               | C79783 DE  |
| chr10 | 88193652 | 88193975 | promoter-1promoter-1    | 33       | NM_00103  | 237433 | Gm4925               | EG237433   |
| chr7  | 31935802 | 31935950 | intron (NM CpG          | 193      | NM_02789  | 52857  | Gramd1a              | 1300003M   |
| chr11 | 1.01E+08 | 1.01E+08 | exon (NM_ exon (NM_     | 1376     | NM_01047  | 15485  | Hsd17b1              | 17HSDB1 :  |
| chr4  | 13364877 | 13365050 | Intergenic Intergenic   | -305486  | NM_00111  | 12395  | Runx1t1              | Cbfa2t1h E |
| chr7  | 1.13E+08 | 1.13E+08 | Intergenic Lx6 LINE L   | -33684   | NM_02900  | 74558  | Gvin1                | 9130002C2  |
| chr17 | 26649452 | 26649700 | Intergenic Intergenic   | -4159    | NM_01364  | 19252  | Dusp1                | 3CH134 M   |
| chr6  | 6527577  | 6527700  | intron (NM intron (NM   | 1020     | NM_00916  | 20422  | Shfm1                | DSS1 Shfdq |
| chr15 | 83303727 | 83303875 | Intergenic MTC LTR I    | -8765    | NM_00115  | 23970  | Pacsin2              | AI197433   |
| chr7  | 1.45E+08 | 1.45E+08 | Intergenic Intergenic   | 225275   | NM_18328  | 70571  | Tcerg1l              | 5730476P1  |
| chr2  | 1.29E+08 | 1.29E+08 | Intergenic Intergenic   | -11626   | NM_02824  | 72477  | Tmem87b              | 2610301K1  |
| chr15 | 84128027 | 84128100 | intron (NM URR1A DN     | -27087   | NM_02232  | 64099  | Parvg                | AI413459   |
| chr11 | 59778077 | 59778150 | exon (NM_ exon (NM_     | 331      | NM_00902  | 19416  | Rasd1                | Dexas1     |
| chr16 | 78577477 | 78577775 | promoter-1promoter-1    | -693     | NM_02596  | 67102  | D16Ertd47:1700010110 |            |
| chr6  | 1.43E+08 | 1.43E+08 | Intergenic B4A SINE     | -4330    | NM_00990  | 12764  | Cmas                 | AW208911   |
| chr1  | 1.15E+08 | 1.15E+08 | Intergenic Intergenic   | -1133093 | NM_00108  | 319901 | Dsel                 | 9330132E0  |

|       |          |          |            |            |         |          |        |            |            |
|-------|----------|----------|------------|------------|---------|----------|--------|------------|------------|
| chr1  | 1.31E+08 | 1.31E+08 | Intergenic | RMER19B    | -155275 | NM_00991 | 12767  | Cxcr4      | CD184 Cm   |
| chr5  | 4008352  | 4008550  | exon (NM_  | exon (NM_  | 80265   | NM_19446 | 100986 | Akap9      | 5730481H2  |
| chr1  | 37258227 | 37258650 | Intergenic | L1MC4 LIN  | -16685  | NM_00128 | 12790  | Cnga3      | CNG3       |
| chr17 | 24592027 | 24592150 | exon (NM_  | exon (NM_  | 168     | NM_00789 | 13560  | E4f1       | -          |
| chr13 | 65223277 | 65223675 | Intergenic | Intergenic | -9186   | NM_13368 | 66631  | Hiatl1     | 5730414C1  |
| chr14 | 45911477 | 45911575 | intron (NM | intron (NM | 26721   | NM_01577 | 50527  | Ero1l      | ERO1-L     |
| chr1  | 1.57E+08 | 1.57E+08 | Intergenic | Intergenic | 64643   | NM_02143 | 58244  | Stx6       | 2310039E0  |
| chr15 | 78729402 | 78729475 | promoter-1 | promoter-1 | -778    | NM_00916 | 20401  | Sh3bp1     | 3BP-1      |
| chr7  | 35098152 | 35098600 | Intergenic | CpG        | -27748  | NM_17274 | 233103 | 4931406P1  | AA553327   |
| chr6  | 92503177 | 92503450 | intron (NM | intron (NM | 14047   | NM_00113 | 243548 | Prickle2   | 6230400G1  |
| chr19 | 46943977 | 46944100 | intron (NM | intron (NM | 92803   | NM_02981 | 76952  | Nt5c2      | 201000212: |
| chr13 | 21258027 | 21258100 | Intergenic | MT2A LTR   | -13737  | NM_00905 | 19720  | Trim27     | AW538890   |
| chr3  | 40482577 | 40482675 | intron (NM | intron (NM | -30167  | NM_17838 | 73333  | Slc25a31   | 1700034J0  |
| chr11 | 95153377 | 95153550 | intron (NM | intron (NM | 18097   | NM_00119 | 217127 | Kat7       | Hbo1 Hbo:  |
| chr9  | 1.04E+08 | 1.04E+08 | promoter-1 | promoter-1 | -220    | NM_17532 | 102632 | Acad11     | 5730439E1  |
| chr6  | 1.19E+08 | 1.19E+08 | intron (NM | Lx5 LINE L | 17963   | NM_19798 | 68465  | Adipor2    | 111000111, |
| chr9  | 41930577 | 41930850 | intron (NM | MIRc SINE  | 1659    | NM_01143 | 20660  | Sorl1      | 2900010L1  |
| chr4  | 9608377  | 9608650  | Intergenic | ORR1E LTF  | -12022  | NM_00129 | 65973  | Asph       | 2310005F1  |
| chr5  | 1.45E+08 | 1.45E+08 | intron (NM | CpG        | 569     | NM_01877 | 55950  | Bri3       | I3         |
| chr17 | 46150602 | 46150675 | Intergenic | Intergenic | 11474   | NM_00111 | 22339  | Vegfa      | Vegf Vpf   |
| chr11 | 1.21E+08 | 1.21E+08 | intron (NM | intron (NM | 1068    | NM_17876 | 319530 | Zfp750     | A030007D:  |
| chr2  | 61549702 | 61550075 | 5' UTR (NV | 5' UTR (NV | 137     | NM_02152 | 59029  | Psmd14     | 2610312CC  |
| chr6  | 39370102 | 39370450 | promoter-1 | promoter-1 | 92      | NM_01881 | 54484  | Mkrn1      | RFP        |
| chr3  | 83599677 | 83599750 | Intergenic | ORR1D1 L   | 29470   | NM_00914 | 20319  | Sfrp2      | AI851596 : |
| chr10 | 57814652 | 57814725 | intron (NM | intron (NM | -19514  | NM_20124 | 110829 | Lims1      | 2310016J2  |
| chr4  | 45806777 | 45806875 | Intergenic | Intergenic | -5068   | NM_02827 | 72535  | Aldh1b1    | 2700007F1  |
| chr6  | 1.17E+08 | 1.17E+08 | Intergenic | Intergenic | -39737  | NM_17876 | 319776 | Tmem72     | C230095G0  |
| chr7  | 30979827 | 30980075 | intron (NM | intron (NM | 116     | NM_00979 | 12336  | Capns1     | Capa-4 Ca: |
| chr19 | 3282902  | 3283050  | promoter-1 | promoter-1 | 34      | NM_00921 | 20589  | Ighmbp2    | AEP Catf1  |
| chr14 | 55724702 | 55724850 | TTS (NM_1  | TTS (NM_1  | 654     | NM_00745 | 11766  | Ap1g2      | Adtg2 G2a  |
| chr14 | 33597327 | 33597525 | Intergenic | Intergenic | -1723   | NM_00116 | 69069  | 1810011H1  | 47334010!  |
| chr11 | 72025602 | 72025800 | intron (NM | intron (NM | -2939   | NM_00116 | 75304  | 4930563E2- |            |
| chr17 | 34776352 | 34776500 | Intergenic | MTC LTR I  | -5402   | NM_01987 | 56299  | Fkbp1      | DIR1 NG7   |
| chr8  | 1.13E+08 | 1.13E+08 | promoter-1 | promoter-1 | 340     | NM_13395 | 101943 | Sf3b3      | 1810061H2  |
| chr12 | 60231227 | 60231450 | intron (NM | intron (NM | 605     | NM_00116 | 217615 | Ctage5     | D12Bwg05   |
| chr19 | 5041352  | 5041425  | promoter-1 | promoter-1 | -16     | NM_13415 | 107392 | Brms1      | AV003220   |
| chr3  | 65677052 | 65677200 | Intergenic | L2 LINE L2 | 85021   | NM_01993 | 56706  | Ccn1l      | 2610030E2  |
| chr5  | 1.05E+08 | 1.05E+08 | intron (NM | intron (NM | 24248   | NM_03023 | 27405  | Abcg3      | Abcp2 Mxi  |
| chr16 | 8667427  | 8667575  | intron (NM | L2b LINE L | 4745    | NM_02582 | 52502  | Carhsp1    | 1200011KC  |
| chr11 | 60726602 | 60726775 | intron (NM | intron (NM | 606     | NM_02529 | 24083  | Natd1      | AI256713   |
| chr14 | 69891677 | 69892075 | intron (NM | intron (NM | 11284   | NM_02633 | 67712  | Slc25a37   | 1700020E2  |
| chr8  | 1.31E+08 | 1.31E+08 | Intergenic | B4A SINE   | 121484  | NM_01057 | 16412  | Itgb1      | 4633401G2  |
| chr1  | 88388877 | 88388950 | Intergenic | Intergenic | -34398  | NM_00897 | 19231  | Ptma       | Thym       |
| chr3  | 54379877 | 54379950 | Intergenic | Intergenic | -117114 | NM_01999 | 56790  | Supt20     | AA667204   |
| chr7  | 1.08E+08 | 1.08E+08 | Intergenic | Intergenic | -8961   | NM_00111 | 73683  | Atg16l2    | 2410118P2  |
| chr4  | 1.38E+08 | 1.38E+08 | exon (NM_  | exon (NM_  | 174     | NM_02845 | 73162  | Otud3      | 3110030K1  |
| chr5  | 24347477 | 24347550 | intron (NM | intron (NM | 666     | NM_05307 | 19744  | Rheb       | -          |

|       |          |          |            |            |         |           |        |         |            |
|-------|----------|----------|------------|------------|---------|-----------|--------|---------|------------|
| chr1  | 87749927 | 87750050 | Intergenic | Intergenic | -41097  | NM_02241  | 64294  | Itm2c   | 3110038L0  |
| chr11 | 95699952 | 95700025 | intron (NM | intron (NM | -3621   | NM_02312  | 14710  | Gngt2   | AV096488   |
| chr13 | 51513077 | 51513150 | intron (NM | intron (NM | 9126    | NM_01010  | 13610  | S1pr3   | AI132464 I |
| chr14 | 73071852 | 73072050 | intron (NM | PB1D10 SI  | 37859   | NM_20763  | 319448 | Fndc3a  | 1700094E1  |
| chr1  | 1.21E+08 | 1.21E+08 | promoter-1 | promoter-1 | -329    | NM_02232  | 64143  | Ralb    | 5730472O1  |
| chr5  | 76954502 | 76954575 | Intergenic | RLTR28 LT  | -3798   | NM_00128  | 69940  | Exoc1   | 2810407P2  |
| chr8  | 3308277  | 3308400  | Intergenic | RLTR44-int | -28721  | NM_01056  | 16337  | Insr    | 4932439J0  |
| chr17 | 48371827 | 48371900 | promoter-1 | promoter-1 | -40     | NM_02140  | 58217  | Trem1   | -          |
| chr4  | 98587702 | 98587925 | Intergenic | PB1D10 SI  | -2688   | NM_14614  | 230484 | Usp1    | -          |
| chr6  | 1.03E+08 | 1.03E+08 | Intergenic | Intergenic | -245982 | NM_00769  | 12661  | Chl1    | A530023M   |
| chrX  | 1.05E+08 | 1.05E+08 | Intergenic | Intergenic | -324463 | NM_00103  | 213450 | Gm732   | -          |
| chr1  | 74439102 | 74439175 | intron (NM | intron (NM | 955     | NM_15308  | 227292 | Ctdsp1  | GIP NLIIF  |
| chr1  | 1.37E+08 | 1.37E+08 | intron (NM | intron (NM | 1564    | NM_00795  | 13924  | Ptpv    | Esp OST C  |
| chr4  | 1.16E+08 | 1.16E+08 | exon (NM_  | exon (NM_  | 114     | NM_00108  | 50927  | Nasp    | 5033430J0  |
| chr5  | 77854752 | 77854950 | Intergenic | Intergenic | -17781  | NM_00804  | 29817  | Igfbp7  | AGM Fstl2  |
| chr7  | 1.19E+08 | 1.19E+08 | promoter-1 | promoter-1 | -44     | NM_13375  | 74996  | Usp47   | 4930502NC  |
| chr19 | 34141752 | 34141950 | promoter-1 | promoter-1 | 3       | NM_02734  | 70166  | Lipn    | 2210418GC  |
| chr11 | 93829502 | 93829625 | 5' UTR (NV | 5' UTR (NV | 272     | NM_00870  | 18102  | Nme1    | AL024257   |
| chr12 | 4082052  | 4082825  | promoter-1 | promoter-1 | -136    | NM_15308  | 217378 | Dnajc27 | AI639580 I |
| chrX  | 1.4E+08  | 1.4E+08  | Intergenic | Intergenic | -104451 | NM_00111  | 13193  | Dcx     | Dbct       |
| chr19 | 5974627  | 5974700  | intron (NM | MLT1E2 LT  | -10457  | NM_00889  | 18969  | Pola2   | AI573378   |
| chr13 | 57397127 | 57397275 | Intergenic | Intergenic | -400252 | NM_01203  | 26946  | Trpc7   | TRP-7 TRP  |
| chr10 | 80959327 | 80959475 | promoter-1 | promoter-1 | -293    | NM_13400  | 103425 | Ncln    | 3100002P1  |
| chr10 | 1.11E+08 | 1.11E+08 | intron (NM | intron (NM | 918     | NM_17548  | 237542 | Osbpl8  | AA536976   |
| chr4  | 1.19E+08 | 1.19E+08 | Intergenic | Intergenic | 37791   | NM_13389  | 100470 | Lao1    | AW990848   |
| chr16 | 22009727 | 22009850 | exon (NM_  | exon (NM_  | 231     | NR_027488 | 75826  | Senp2   | 2310007L0  |
| chr16 | 23144452 | 23144750 | Intergenic | Intergenic | -2008   | NM_00960  | 11450  | Adipoq  | 30kDa APN  |
| chr12 | 86738227 | 86738600 | Intergenic | Intergenic | -22746  | NM_02677  | 68581  | Tmed10  | 1110014CC  |
| chr12 | 56592627 | 56592725 | exon (NM_  | exon (NM_  | 958     | NM_01090  | 18035  | Nfkbia  | AI462015 I |
| chr14 | 31292577 | 31292850 | promoter-1 | promoter-1 | -38     | NM_13376  | 75901  | Dcp1a   | 1110066A2  |
| chr18 | 30457827 | 30457950 | intron (NM | intron (NM | 25338   | NM_18141  | 225326 | Pik3c3  | 5330434F2  |
| chr12 | 38719202 | 38719425 | intron (NM | LTR40b LT  | 112021  | NM_17868  | 217480 | Dgkb    | 6430574F2  |
| chr3  | 95976327 | 95976575 | promoter-1 | promoter-1 | -22     | NM_15305  | 107701 | Sf3b4   | 49kDa SF3  |
| chr1  | 6205352  | 6205525  | intron (NM | intron (NM | 695     | NM_00982  | 12421  | Rb1cc1  | 2900055E0  |
| chr5  | 1.49E+08 | 1.49E+08 | intron (NM | intron (NM | 24851   | NM_01022  | 14254  | Flt1    | AI323757 I |
| chr13 | 1.01E+08 | 1.01E+08 | intron (NM | intron (NM | 6602    | NM_00116  | 76041  | Ccdc125 | 5830436DC  |
| chr1  | 1.93E+08 | 1.93E+08 | Intergenic | B3 SINE B  | 22984   | NM_02542  | 66208  | Nenf    | 1110060M   |
| chr2  | 1.65E+08 | 1.65E+08 | TTS (NM_2  | TTS (NM_2  | 399     | NM_00125  | 228875 | Slc35c2 | C85957 CC  |
| chr5  | 5514552  | 5514625  | intron (NM | CpG        | 201     | NM_00119  | 64945  | Cldn12  | -          |
| chr2  | 24530002 | 24530075 | intron (NM | intron (NM | 88634   | NM_00104  | 12287  | Cacna1b | AW050276   |
| chr11 | 1.2E+08  | 1.2E+08  | intron (NM | CpG        | 408     | NM_13379  | 192662 | Arhgdia | 5330430M   |
| chr1  | 1.2E+08  | 1.2E+08  | Intergenic | Intergenic | 13406   | NM_02647  | 67949  | Nifk    | AI852665 I |
| chr8  | 1.14E+08 | 1.14E+08 | promoter-1 | promoter-1 | -129    | NM_14621  | 234734 | Aars    | AI316495 I |
| chr9  | 40605352 | 40605525 | Intergenic | (TTC)n Sim | -3918   | NM_03116  | 15481  | Hspa8   | 2410008N1  |
| chr15 | 99556102 | 99556175 | promoter-1 | promoter-1 | 89      | NM_18325  | 66379  | Cox14   | 2310016M   |
| chr6  | 36087202 | 36087575 | Intergenic | Intergenic | -250696 | NM_20349  | 243764 | Chrm2   | AChR-M2 I  |
| chr16 | 84835377 | 84835600 | 5' UTR (NV | 5' UTR (NV | 119     | NM_00806  | 14390  | Gabpa   | GABPalpha  |

|       |          |          |            |            |        |          |        |          |            |
|-------|----------|----------|------------|------------|--------|----------|--------|----------|------------|
| chr1  | 94696327 | 94696400 | Intergenic | Intergenic | -31900 | NM_01669 | 14733  | Gpc1     | AI462976   |
| chr19 | 56622677 | 56622950 | promoter-1 | promoter-1 | 62     | NM_02581 | 66866  | Nhlrc2   | 1200003GC  |
| chr1  | 37597477 | 37597575 | intron (NM | CpG        | 335    | NM_17387 | 269181 | Mgat4a   | 953001810  |
| chr11 | 1.16E+08 | 1.16E+08 | exon (NM_  | exon (NM_  | 147    | NM_02636 | 67763  | Prpsap1  | 5730409F2  |
| chr13 | 1.05E+08 | 1.05E+08 | Intergenic | Intergenic | 206270 | NM_02607 | 67285  | Cwc27    | 3110009E1  |
| chr4  | 1.26E+08 | 1.26E+08 | intron (NM | intron (NM | 6842   | NM_17270 | 230751 | Oscp1    | 1810007P1  |
| chr11 | 16856627 | 16856725 | Intergenic | Intergenic | 5263   | NM_17698 | 319701 | Fbxo48   | A630050E1  |
| chr13 | 43619877 | 43620050 | Intergenic | Intergenic | 35597  | NM_00108 | 76137  | Mcur1    | 6230416AC  |
| chr8  | 1.17E+08 | 1.17E+08 | intron (NM | intron (NM | 176411 | NM_01957 | 80707  | Wwox     | 5330426PC  |
| chr19 | 47929902 | 47930200 | intron (NM | intron (NM | 572    | NM_01036 | 14873  | Gsto1    | AA407097   |
| chr5  | 65748077 | 65748625 | intron (NM | Charlie21a | 8701   | NM_03118 | 83379  | Klb      | AV071179   |
| chr17 | 24349327 | 24349425 | Intergenic | Intergenic | -3044  | NM_01094 | 18209  | Ntn3     | Ntn2l      |
| chr13 | 98797552 | 98797800 | intron (NM | intron (NM | 178444 | NM_01202 | 110596 | Arhgef28 | 9230110LO  |
| chr9  | 21229577 | 21229675 | exon (NM_  | exon (NM_  | 274    | NM_00103 | 13430  | Dnm2     | Dyn2 Udnr  |
| chr14 | 1.06E+08 | 1.06E+08 | promoter-1 | promoter-1 | 56     | NM_13407 | 74213  | Rbm26    | 1700009PC  |
| chr15 | 58810302 | 58810725 | intron (NM | intron (NM | 45148  | NM_02317 | 66218  | Ndufb9   | 1190008J1  |
| chr7  | 29227927 | 29228100 | intron (NM | MIRb SINE  | 2057   | NM_00103 | 63986  | Gmfg     | 0610039G1  |
| chr14 | 99871427 | 99871675 | Intergenic | Intergenic | 173641 | NM_00976 | 12224  | Klf5     | 4930520J0  |
| chr10 | 61245927 | 61246075 | intron (NM | CpG        | 611    | NM_20700 | 404634 | H2afy2   | macroH2A:  |
| chr1  | 40842802 | 40843000 | intron (NM | intron (NM | 4601   | NM_17249 | 211798 | Mfsd9    | 4931419KC  |
| chr9  | 1.08E+08 | 1.08E+08 | exon (NM_  | exon (NM_  | -10965 | NM_14622 | 235606 | Apeh     | -          |
| chr1  | 1.73E+08 | 1.73E+08 | Intergenic | L2 LINE L2 | -20086 | NM_01018 | 14130  | Fcgr2b   | AI528646   |
| chr18 | 67412002 | 67412125 | Intergenic | Lx8 LINE L | -6579  | NM_17263 | 225651 | Mppe1    | A530095G:  |
| chr5  | 1.41E+08 | 1.41E+08 | intron (NM | intron (NM | 1993   | NM_00849 | 16848  | Lfng     | AW061165   |
| chr14 | 31431102 | 31431225 | intron (NM | intron (NM | 8231   | NM_01110 | 18753  | Prkcd    | AI385711   |
| chr10 | 42622552 | 42622675 | intron (NM | intron (NM | 42295  | NM_17293 | 268297 | Scml4    | 9330161D1  |
| chr2  | 1.58E+08 | 1.58E+08 | intron (NM | B3A SINE   | 4547   | NM_00848 | 16803  | Lbp      | Bpifd2 Ly8 |
| chr4  | 1.08E+08 | 1.08E+08 | Intergenic | ID4 SINE I | -1356  | NM_00103 | 414872 | Zyg11b   | 111004610: |
| chr3  | 1.42E+08 | 1.42E+08 | promoter-1 | promoter-1 | -37    | NM_00108 | 229900 | Gbp7     | 9830147J2  |
| chr12 | 83488052 | 83488325 | intron (NM | intron (NM | 75852  | NM_17257 | 217692 | Sipa1l1  | 4931426N1  |
| chrY  | 2885902  | 2885975  | Intergenic | Intergenic | 498680 | NM_00127 | 1E+08  | Gm3376   | Rbmy1b     |
| chr1  | 1.81E+08 | 1.81E+08 | intron (NM | intron (NM | 346    | NM_02718 | 69726  | Smyd3    | 2410008A1  |
| chr1  | 43502877 | 43503125 | intron (NM | CpG        | 405    | NM_01087 | 17974  | Nck2     | 483342611  |
| chr2  | 35194227 | 35194575 | Intergenic | Intergenic | -1872  | NM_01351 | 13830  | Stom     | Epb7.2     |
| chr8  | 1.2E+08  | 1.2E+08  | exon (NM_  | exon (NM_  | 31386  | NM_02968 | 76645  | Pkd1l2   | 1700126LO  |
| chr14 | 65999302 | 65999450 | intron (NM | intron (NM | 21863  | NM_19902 | 380912 | Zfp395   | BC053701   |
| chr9  | 20807502 | 20807575 | exon (NM_  | exon (NM_  | 357    | NM_02316 | 66163  | Mrpl4    | 1110017G1  |
| chr19 | 3686027  | 3686200  | intron (NM | CpG        | 451    | NM_00851 | 16973  | Lrp5     | BMND1 HI   |
| chr16 | 44139102 | 44140175 | promoter-1 | promoter-1 | -284   | NM_02810 | 72117  | Naa50    | 2600005K2  |
| chr1  | 1.3E+08  | 1.3E+08  | Intergenic | Intergenic | -51758 | NM_14550 | 226414 | Dars     | 5730439G1  |
| chr4  | 1.5E+08  | 1.5E+08  | intron (NM | CpG        | 342    | NM_02056 | 57320  | Park7    | DJ-1 Dj1   |
| chr17 | 29639027 | 29639250 | Intergenic | Intergenic | 11148  | NM_00884 | 18712  | Pim1     | Pim-1      |
| chr13 | 55816052 | 55816250 | exon (NM_  | exon (NM_  | 140    | NM_17515 | 69672  | Txndc15  | 2310047H2  |
| chr2  | 1.12E+08 | 1.12E+08 | 3' UTR (NM | 3' UTR (NM | 830    | NM_02540 | 66181  | Nop10    | 1110036B1  |
| chr6  | 13557702 | 13558050 | 5' UTR (NM | 5' UTR (NM | 187    | NM_02899 | 101118 | Tmem168  | 5730526F1  |
| chr9  | 15084827 | 15085025 | promoter-1 | promoter-1 | -615   | NM_14493 | 234959 | Med17    | 77kDa C33  |
| chr15 | 61815077 | 61815250 | Intergenic | Intergenic | -1733  | NM_00117 | 17869  | Myc      | AU016757   |

|       |          |          |             |             |        |           |        |          |            |
|-------|----------|----------|-------------|-------------|--------|-----------|--------|----------|------------|
| chr17 | 46439302 | 46439375 | TTS (NM_1   | TTS (NM_1   | 4461   | NM_00128  | 106565 | Dlk2     | AI413481 I |
| chr6  | 99342527 | 99342750 | intron (NM  | intron (NM  | 42701  | NM_05320  | 108655 | Foxp1    | 3110052D1  |
| chr7  | 1.35E+08 | 1.35E+08 | promoter-1  | promoter-1  | -328   | NM_02699  | 69234  | Zfp688   | 2810407KC  |
| chr1  | 7727352  | 7727725  | Intergenic  | RLTR26 LT   | 648537 | NM_18302  | 319263 | Pcmt1d1  | 8430411F1  |
| chr6  | 8720952  | 8721150  | intron (NM  | intron (NM  | 7433   | NM_01049  | 15893  | Ica1     | 69kDa ICA  |
| chr1  | 1.46E+08 | 1.46E+08 | Intergenic  | Intergenic  | 86678  | NM_00906  | 19735  | Rgs2     | GOS8       |
| chr5  | 50332852 | 50332925 | Intergenic  | Lx8 LINE L  | 117347 | NM_13391  | 70693  | Gpr125   | 3830613O2  |
| chr8  | 28090352 | 28090425 | exon (NM_   | exon (NM_   | 2580   | NM_00111  | 353310 | Zfp703   | 1110032O1  |
| chr12 | 77641177 | 77641425 | intron (NM  | intron (NM  | 6754   | NM_15380  | 263406 | Plekhg3  | BC030417   |
| chr11 | 1.2E+08  | 1.2E+08  | Intergenic  | Intergenic  | 18837  | NM_01377  | 27376  | Slc25a10 | Dic        |
| chr6  | 6528102  | 6528625  | intron (NM  | CpG         | 295    | NM_00916  | 20422  | Shfm1    | DSS1 Shfd  |
| chr7  | 1.21E+08 | 1.21E+08 | intron (NM  | intron (NM  | 97182  | NM_02584  | 66922  | Rras2    | 2610016H2  |
| chr9  | 1.09E+08 | 1.09E+08 | exon (NM_   | exon (NM_   | 152    | NM_03072  | 80987  | Nckipsd  | AF3P21 DI  |
| chr6  | 88697852 | 88697950 | intron (NM  | intron (NM  | 23203  | NM_00116  | 23945  | Mgll     | AA589436   |
| chr15 | 91403052 | 91403250 | exon (NM_   | exon (NM_   | 541    | NM_00103  | 239606 | Slc2a13  | 6530403AC  |
| chr12 | 86940927 | 86941025 | promoter-1  | promoter-1  | 8      | NM_00120  | 81703  | Jdp2     | Jundm2 Ju  |
| chr15 | 79513852 | 79513950 | intron (NM  | intron (NM  | 4401   | NM_02879  | 74158  | Josd1    | 1300006CC  |
| chr1  | 1.64E+08 | 1.64E+08 | intron (NM  | intron (NM  | 991    | NM_17264  | 226551 | Suco     | 4732491B1  |
| chr19 | 44323477 | 44323550 | Intergenic  | Intergenic  | -44653 | NM_00912  | 20250  | Scd2     | Scd-2 swty |
| chr10 | 23506877 | 23506950 | intron (NM  | CpG-934     | 102    | NM_01129  | 20042  | Rps12    | -          |
| chr13 | 24883277 | 24883350 | Intergenic  | Intergenic  | -10213 | NM_02447  | 79555  | BC005537 | 8030460CC  |
| chr1  | 1.72E+08 | 1.72E+08 | 5' UTR (NV  | 5' UTR (NV  | 111    | NM_01063  | 16589  | Uhmk1    | 4732477C1  |
| chr3  | 1.01E+08 | 1.01E+08 | exon (NM_   | exon (NM_   | 148    | NM_00101  | 74044  | Ttf2     | 4632434F2  |
| chrX  | 71499077 | 71499275 | promoter-1  | promoter-1  | -850   | NM_00792  | 13726  | Emd      | AW550900   |
| chr4  | 1.49E+08 | 1.49E+08 | 5' UTR (NV  | 5' UTR (NV  | 227    | NM_02202  | 63958  | Ube4b    | 493055111! |
| chr7  | 38379527 | 38379650 | intron (NM  | intron (NM  | 175183 | NM_17238  | 243937 | Zfp536   | 9630010P1  |
| chr5  | 89149402 | 89149525 | promoter-1  | promoter-1  | -433   | NM_02673  | 68473  | Mob1b    | 1110003E0  |
| chr7  | 26540202 | 26540350 | promoter-1  | promoter-1  | -537   | NM_14492  | 232989 | Hnrnpul1 | E130317O1  |
| chr9  | 57408727 | 57408925 | promoter-1  | promoter-1  | 75     | NM_02281  | 24044  | Scamp2   | AI875466 ! |
| chr5  | 1.08E+08 | 1.08E+08 | intron (NM  | intron (NM  | 370    | NM_02606  | 67266  | Fam69a   | 2900024C2  |
| chr17 | 66300252 | 66300475 | intron (NM  | CpG         | 164    | NM_02305  | 65960  | Twsg1    | 1810013J1! |
| chr1  | 93352927 | 93353125 | intron (NM  | intron (NM  | 2879   | NM_01106  | 18627  | Per2     | mKIAA034!  |
| chr6  | 83066102 | 83066275 | exon (NM_   | exon (NM_   | 688    | NM_02061  | 57377  | Mogs     | 1810017NC  |
| chr4  | 41315202 | 41315650 | intron (NM  | intron (NM  | 19397  | NM_02330  | 67123  | Ubap1    | 2700092AC  |
| chr12 | 78051327 | 78051600 | intron (NM  | intron (NM  | 11772  | NM_00855  | 17187  | Max      | AA960152   |
| chr18 | 68017177 | 68017400 | intron (NM  | intron (NM  | 57527  | NM_02755  | 70799  | Cep192   | 4631422C1  |
| chr1  | 1.79E+08 | 1.79E+08 | promoter-1  | promoter-1  | -990   | NM_02975  | 76816  | Sdccag8  | 2700048G2  |
| chr8  | 1.07E+08 | 1.07E+08 | intron (NR_ | intron (NR_ | 15470  | NR_045642 | 57813  | Tk2      | AU024611   |
| chr8  | 34710752 | 34710900 | intron (NM  | intron (NM  | 733    | NM_01737  | 19053  | Ppp2cb   | AI115466 ! |
| chr13 | 1.05E+08 | 1.05E+08 | promoter-1  | promoter-1  | -435   | NM_00100  | 59079  | Erbb2ip  | 1700028E0  |
| chr4  | 94742377 | 94742700 | Intergenic  | Intergenic  | -23625 | NM_01059  | 16476  | Jun      | AP-1 Junc  |
| chr12 | 17688902 | 17689225 | Intergenic  | Intergenic  | -8557  | NM_01667  | 53602  | Hpcal1   | NVP-3 Nvp  |
| chr7  | 1.5E+08  | 1.5E+08  | intron (NM  | ORR1E LTF   | 22726  | NM_17726  | 320802 | Ifitm10  | 6330512M   |
| chr13 | 73468702 | 73468900 | intron (NM  | CpG         | 344    | NM_05316  | 94066  | Mrpl36   | AI646041   |
| chr12 | 79850277 | 79850350 | intron (NM  | CpG         | 379    | NM_01957  | 56217  | Mpp5     | 3830420BC  |
| chr17 | 35271677 | 35271800 | promoter-1  | promoter-1  | -385   | NM_00125  | 224727 | Bag6     | 2410045D2  |
| chr2  | 1.28E+08 | 1.28E+08 | intron (NM  | intron (NM  | -63036 | NM_20768  | 12125  | Bcl2l11  | 1500006F2  |

|       |          |          |                       |        |          |        |          |             |
|-------|----------|----------|-----------------------|--------|----------|--------|----------|-------------|
| chr3  | 1.42E+08 | 1.42E+08 | intron (NM CpG        | 201    | NM_00129 | 229905 | Ccbl2    | KATIII Kat3 |
| chr6  | 1.34E+08 | 1.34E+08 | Intergenic Intergenic | -16724 | NM_00796 | 14011  | Etv6     | AW123102    |
| chr14 | 73183102 | 73183250 | Intergenic Intergenic | -73366 | NM_20763 | 319448 | Fndc3a   | 1700094E1   |
| chr1  | 1.36E+08 | 1.36E+08 | 5' UTR (NM 5' UTR (NM | 149    | NM_00116 | 667118 | Zbed6    | Gm8466 N    |
| chr4  | 58980927 | 58981075 | intron (NM intron (NM | 18949  | NM_02596 | 67103  | Ptgr1    | 2510002C2   |
| chr9  | 59389052 | 59389175 | intron (NM intron (NM | 1639   | NM_01042 | 15211  | Hexa     | Hex-1       |
| chr11 | 98412127 | 98412300 | promoter-1promoter-1  | -198   | NM_19941 | 69376  | Zpbp2    | 1700017D1   |
| chr8  | 26711827 | 26711925 | promoter-1promoter-1  | -902   | NM_00100 | 234135 | Whsc111  | 6720429E0   |
| chr7  | 82932177 | 82932425 | Intergenic Intergenic | -60923 | NM_00112 | 207952 | Klhl25   | 2810402K1   |
| chr3  | 27997977 | 27998125 | intron (NMB2_Mm1t     | 114958 | NM_00887 | 18805  | Pld1     | AA536939    |
| chr16 | 13109502 | 13109625 | promoter-1promoter-1  | -266   | NM_01576 | 50505  | Ercc4    | AI606920 :  |
| chr4  | 96204027 | 96204100 | intron (NM intron (NM | 16279  | NM_01000 | 13110  | Cyp2j6   | -           |
| chr4  | 1.55E+08 | 1.55E+08 | promoter-1promoter-1  | 494    | NM_17920 | 108888 | Atad3a   | 2400004HC   |
| chr13 | 41066677 | 41066850 | Intergenic Intergenic | -29616 | NM_02655 | 68083  | Pak1ip1  | 58304311I!  |
| chr8  | 86177202 | 86177350 | intron (NM intron (NM | 699    | NM_01877 | 67903  | Gipc1    | GIPC Glut1  |
| chr13 | 42469577 | 42469675 | Intergenic Intergenic | 72987  | NM_01010 | 13614  | Edn1     | ET-1 prepr  |
| chr5  | 12877627 | 12877800 | Intergenic RLTR45 LT  | 494547 | NM_02888 | 108151 | Sema3d   | 4631426B1   |
| chr7  | 1.28E+08 | 1.28E+08 | promoter-1promoter-1  | -520   | NM_02529 | 26939  | Polr3e   | RPC5 Sin    |
| chr16 | 23104252 | 23104325 | Intergenic MTB_Mm     | -3253  | NM_00112 | 13682  | Eif4a2   | 4833432NC   |
| chr4  | 1.33E+08 | 1.33E+08 | Intergenic Intergenic | 26380  | NM_01695 | 15331  | Hmgn2    | HMG-17 H    |
| chr19 | 7921102  | 7921200  | Intergenic ETnERV3-ir | -43994 | NM_14623 | 236149 | Slc22a26 | -           |
| chr14 | 21277627 | 21277750 | intron (NM intron (NM | -6241  | NM_00116 | 76670  | Ttc18    | -           |
| chr5  | 1.23E+08 | 1.23E+08 | intron (NM intron (NM | 3426   | NM_00128 | 330188 | Ccdc63   | 4921511C1   |
| chr18 | 75178452 | 75178750 | 5' UTR (NM 5' UTR (NM | 175    | NM_02772 | 69190  | Dym      | 1810041M    |
| chr14 | 65481577 | 65481675 | intron (NM URR1A DN   | 87058  | NM_17733 | 219150 | Hmbox1   | AI451877 ,  |
| chr7  | 17559402 | 17559700 | Intergenic Intergenic | 14407  | NM_00100 | 71691  | Pnmal1   | 07100051I!  |
| chr13 | 96482752 | 96483200 | intron (NM intron (NM | 16101  | NM_01017 | 14064  | F2rl2    | F730031AC   |
| chr2  | 1.56E+08 | 1.56E+08 | promoter-1promoter-1  | 73     | NM_00129 | 170791 | Rbm39    | 1500012C1   |
| chr19 | 5487777  | 5487850  | exon (NM_exon (NM_    | 523    | NM_02787 | 71711  | Mus81    | 1200008A1   |
| chr18 | 65072977 | 65073050 | intron (NM intron (NM | 25603  | NM_00111 | 83814  | Nedd4l   | 1300012CC   |
| chr13 | 37196852 | 37197150 | Intergenic RLTR4_MM   | -54888 | NM_00116 | 74145  | F13a1    | 1200014IO:  |
| chr10 | 81106602 | 81106725 | intron (NM CpG        | -5151  | NM_00114 | 1E+08  | Gm10778  | ENSMUSGC    |
| chr7  | 89581777 | 89581900 | intron (NML1MD1 LIN   | 97634  | NM_00119 | 269959 | Adamts13 | 9230119C1   |
| chr8  | 1.17E+08 | 1.17E+08 | intron (NM intron (NM | 408174 | NM_01957 | 80707  | Wwox     | 5330426PC   |
| chr10 | 80462577 | 80462650 | intron (NM intron (NM | 1497   | NM_00103 | 14708  | Gng7     | AI840417    |
| chr10 | 60937227 | 60937475 | Intergenic Intergenic | -1230  | NM_15354 | 216011 | Lrrc20   | BC036304    |
| chr1  | 16509427 | 16509600 | promoter-1promoter-1  | -130   | NM_00111 | 29819  | Stau2    | -           |
| chr13 | 9102027  | 9102225  | intron (NM intron (NM | 8975   | NM_17258 | 217980 | Larp4b   | A630096F1   |
| chr1  | 1.56E+08 | 1.56E+08 | intron (NM MTE2a LTF  | 36970  | NM_01188 | 24014  | Rnasel   | E230029IO:  |
| chr9  | 69880102 | 69880325 | 3' UTR (NM 3' UTR (NM | 5682   | NM_02808 | 72077  | Gcnt3    | 2010013H2   |
| chr8  | 73810202 | 73810450 | intron (NM intron (NM | 13713  | NM_00114 | 17925  | Myo9b    | -           |
| chr2  | 1.58E+08 | 1.58E+08 | exon (NM_exon (NM_    | 3657   | NM_00950 | 22348  | Slc32a1  | R75019 VC   |
| chr15 | 96566252 | 96566325 | Intergenic Intergenic | -36159 | NM_17512 | 67760  | Slc38a2  | 5033402L1   |
| chr2  | 1.32E+08 | 1.32E+08 | Intergenic Intergenic | 32165  | NM_00127 | 26434  | Prnd     | AI450264    |
| chr13 | 94944327 | 94944550 | exon (NM_exon (NM_    | 110798 | NM_02915 | 107767 | Scamp1   | 4930505M    |
| chr1  | 99600802 | 99600975 | Intergenic Lx9 LINE L | -42293 | NM_13382 | 52392  | D1Ert622 | AI987691 ,  |
| chr3  | 51162002 | 51162175 | Intergenic Intergenic | -17522 | NM_02350 | 69257  | Elf2     | 2610036A2   |



|       |          |          |                        |        |           |        |          |            |
|-------|----------|----------|------------------------|--------|-----------|--------|----------|------------|
| chr5  | 31522652 | 31522850 | exon (NM_exon (NM_     | 167    | NM_00801  | 14208  | Ppm1g    | AI385652 I |
| chr12 | 35682652 | 35682825 | Intergenic Intergenic  | 13305  | NM_02929  | 75456  | Prps11l  | 1700011K1  |
| chr15 | 75900202 | 75900275 | promoter-1promoter-1   | -78    | NM_13408  | 105782 | Scrib    | AI118201 I |
| chr13 | 1.02E+08 | 1.02E+08 | Intergenic Intergenic  | 71834  | NM_00102  | 18708  | Pik3r1   | PI3K p50aI |
| chr8  | 96738277 | 96738375 | promoter-1promoter-1   | -175   | NM_17241  | 71805  | Nup93    | 2410008GC  |
| chr11 | 33953377 | 33953725 | intron (NM_intron (NM  | 6350   | NM_01069  | 16822  | Lcp2     | AI323664 I |
| chr5  | 21292652 | 21292800 | intron (NM CpG-10862   | 1625   | NM_01118  | 19181  | Psmc2    | -          |
| chr7  | 1.09E+08 | 1.09E+08 | intron (NR_intron (NR_ | -1760  | NM_00749  | 11871  | Art2a-ps | ARTC2 Art  |
| chr13 | 97512927 | 97513100 | Intergenic Intergenic  | -72122 | NM_00825  | 15357  | Hmgcr    | HMG-CoAR   |
| chr18 | 38465902 | 38466425 | intron (NM_intron (NM  | 9704   | NM_00116  | 56736  | Rnf14    | 2310075CC  |
| chr2  | 18688527 | 18688700 | Intergenic CpG         | 67964  | NM_00100  | 381350 | BC061194 | -          |
| chr8  | 1.23E+08 | 1.23E+08 | intron (NM_intron (NM  | 22006  | NM_03020  | 78892  | Crispld2 | 1810049K2  |
| chr7  | 20249727 | 20249875 | intron (NM MIR3 SINE   | 578    | NM_01964  | 56457  | Clptm1   | HS9 N14    |
| chr13 | 8873002  | 8873275  | Intergenic Intergenic  | -2156  | NM_00103  | 207615 | Wdr37    | -          |
| chr15 | 66801127 | 66801500 | promoter-1promoter-1   | -110   | NM_00868  | 17988  | Ndrp1    | CAP43 CM   |
| chr19 | 42165177 | 42165250 | exon (NM_exon (NM_     | 288    | NM_14550  | 84095  | Pi4k2a   | Pi4k2      |
| chr17 | 74297302 | 74297750 | intron (NM_intron (NM  | 2010   | NM_01172  | 22436  | Xdh      | XO Xor Xo  |
| chr11 | 51912627 | 51912700 | intron (NM CpG         | 337    | NM_01941  | 19052  | Ppp2ca   | PP2A R753  |
| chr10 | 77875302 | 77875475 | intron (NM CpG         | 400    | NM_01092  | 18114  | Rrp1     | AL033305   |
| chr6  | 72462527 | 72462875 | Intergenic Intergenic  | -31684 | NM_00759  | 12332  | Capg     | gCap39 ml  |
| chr8  | 13757327 | 13757425 | promoter-1promoter-1   | -314   | NM_02727  | 69957  | Cdc16    | 2700071J1  |
| chr5  | 31939402 | 31939625 | intron (NM_intron (NM  | 23189  | NM_02579  | 66845  | Mrpl33   | 0610009M   |
| chr9  | 1.06E+08 | 1.06E+08 | promoter-1promoter-1   | -237   | NM_15345  | 235584 | Dusp7    | AU015694   |
| chr7  | 1.36E+08 | 1.36E+08 | 5' UTR (NM 5' UTR (NV  | 130    | NM_14595  | 210711 | Mcmbp    | 1110007A1  |
| chr13 | 60783402 | 60783525 | intron (NM_intron (NM  | 79891  | NM_13406  | 69635  | Dapk1    | D13Ucla1   |
| chr5  | 1.3E+08  | 1.3E+08  | promoter-1promoter-1   | 20     | NM_17227  | 231769 | Sfswap   | 1190005N2  |
| chr5  | 1.03E+08 | 1.03E+08 | intron (NM_intron (NM  | 90241  | NM_02927  | 231532 | Arhgap24 | 0610025G2  |
| chr17 | 3157177  | 3157300  | intron (NM RLTR11B L   | 42266  | NM_13412  | 106583 | Scaf8    | A630086M   |
| chr2  | 1.58E+08 | 1.58E+08 | promoter-1promoter-1   | -403   | NM_00848  | 16803  | Lbp      | Bpifd2 Ly8 |
| chr7  | 52459752 | 52459825 | intron (NM_intron (NM  | 474    | NM_20137  | 384619 | Ccdc155  | Gm1434 K   |
| chr3  | 94493052 | 94493325 | Intergenic (GAA)n Sin  | -4307  | NM_01941  | 20342  | Selenbp2 | AP56 Lpsb  |
| chr5  | 1.22E+08 | 1.22E+08 | 5' UTR (NM 5' UTR (NV  | 125    | NM_01076  | 17165  | Mapkapk5 | MK5 PRAK   |
| chr8  | 34786577 | 34786725 | intron (NM_intron (NM  | 22941  | NM_01034  | 14782  | Gsr      | AI325518 I |
| chr8  | 86521227 | 86521300 | promoter-1promoter-1   | -308   | NM_00108  | 666704 | Samd1    | AA589507   |
| chr18 | 49846777 | 49847250 | Intergenic Intergenic  | 68242  | NM_02685  | 68857  | Dtwd2    | 1190002HC  |
| chr1  | 36767027 | 36767100 | promoter-1promoter-1   | -293   | NM_14610  | 226977 | Actr1b   | 2310066K2  |
| chr15 | 11967127 | 11967250 | Intergenic Intergenic  | -41426 | NM_01129  | 20024  | Sub1     | AI842364 I |
| chr6  | 70737027 | 70737400 | intron (NM_intron (NM  | 4956   | NM_00907  | 19895  | Rpia     | RPI        |
| chr7  | 59242227 | 59242675 | intron (NM_intron (NM  | 18633  | NR_027704 | 75744  | Svip     | 1700006C1  |
| chr13 | 1.14E+08 | 1.14E+08 | intron (NM B4A SINE    | 17846  | NM_13079  | 170625 | Snx18    | Snag1      |
| chr8  | 89426602 | 89426800 | Intergenic Intergenic  | -17544 | NM_03056  | 80750  | N4bp1    | AI481586 I |
| chr17 | 51015852 | 51015975 | intron (NM_intron (NM  | 177907 | NM_00129  | 12228  | Btg3     | ANA tob5   |
| chr9  | 96276402 | 96276525 | Intergenic Intergenic  | -11745 | NM_00750  | 11933  | Atp1b3   | AA409958   |
| chr19 | 6235977  | 6236200  | promoter-1promoter-1   | -248   | NM_19816  | 225849 | Ppp2r5b  | B'beta BCC |
| chr11 | 86014902 | 86015250 | promoter-1promoter-1   | -381   | NM_17830  | 237911 | Brip1    | 3110009N1  |
| chrX  | 13232477 | 13232650 | intron (NM_intron (NM  | -5926  | NM_17566  | 319200 | Gpr82    | -          |
| chr10 | 50312227 | 50312300 | promoter-1promoter-1   | -212   | NM_19800  | 77987  | Ascc3    | ASC1p200   |

|       |          |          |                      |            |         |          |        |          |            |
|-------|----------|----------|----------------------|------------|---------|----------|--------|----------|------------|
| chr5  | 36827402 | 36827550 | promoter-1           | promoter-1 | 239     | NM_02572 | 66717  | Ccdc96   | 4921513E0  |
| chr7  | 52309252 | 52309450 | 3' UTR (NM           | 3' UTR (NM | -1100   | NM_17502 | 233210 | Prr12    | 6720469B1  |
| chr1  | 1.68E+08 | 1.68E+08 | Intergenic           | Intergenic | -23476  | NM_00103 | 226594 | Rcsd1    | A430105K1  |
| chr2  | 1.45E+08 | 1.45E+08 | Intergenic           | Intergenic | -16334  | NM_05319 | 94249  | Slc24a3  | NCKX3      |
| chr4  | 41082852 | 41083025 | promoter-1           | promoter-1 | -116    | NM_02627 | 67615  | Ube2r2   | 1200003M   |
| chr3  | 78956827 | 78957100 | Intergenic           | Intergenic | -7166   | NM_00109 | 76089  | Rapgef2  | 5830453M   |
| chr5  | 1.15E+08 | 1.15E+08 | promoter-1           | promoter-1 | -229    | NM_00103 | 100756 | Usp30    | 6330590F1  |
| chr11 | 1.02E+08 | 1.02E+08 | intron (NM           | CpG        | 288     | NM_00104 | 21429  | Ubtf     | A930005G(  |
| chr3  | 1.33E+08 | 1.33E+08 | promoter-1           | promoter-1 | 366     | NM_02623 | 67553  | Gstcd    | 4933434L1  |
| chr9  | 44872502 | 44872725 | intron (NM           | intron (NM | 9349    | NM_00109 | 319742 | Mpzl3    | 5430427F1  |
| chr4  | 1.19E+08 | 1.19E+08 | 5' UTR (NM           | 5' UTR (NM | 122     | NM_17269 | 230700 | Foxj3    | C330039G(  |
| chr8  | 63966727 | 63966900 | intron (NM           | CpG        | 282     | NM_14559 | 234309 | Cbr4     | A730083J1  |
| chr8  | 70431827 | 70431900 | intron (NML1M3 LINE  |            | 2982    | NM_03026 | 234353 | Psd3     | 4931420C2  |
| chrX  | 99239777 | 99240050 | intron (NML2a LINE L |            | 26733   | NM_00127 | 331474 | Rgag4    | 6430402L0  |
| chr10 | 80317602 | 80317675 | promoter-1           | promoter-1 | 316     | NM_02534 | 66094  | Lsm7     | 0910001BC  |
| chr7  | 1.03E+08 | 1.03E+08 | Intergenic           | RLTR11A2   | -130696 | NM_01185 | 23966  | Tenm4    | Doc4 ELM:  |
| chr11 | 24021302 | 24021400 | intron (NM           | intron (NM | 40656   | NM_00115 | 14025  | Bcl11a   | 2810047E1  |
| chr11 | 68685277 | 68685625 | Intergenic           | Intergenic | -16604  | NM_17706 | 320040 | Rnf222   | 9930039A1  |
| chr11 | 57953327 | 57953425 | intron (NM           | intron (NM | 28665   | NM_17255 | 216766 | Gemin5   | AA407055   |
| chr10 | 10869402 | 10869550 | intron (NM           | CpG        | 248     | NM_00128 | 268281 | Shprh    | 2610103K1  |
| chr2  | 3430452  | 3430700  | promoter-1           | promoter-1 | 239     | NM_17764 | 227526 | Cdnf     | 9330140G2  |
| chr7  | 52241377 | 52241600 | promoter-1           | promoter-1 | 302     | NM_00125 | 15469  | Prmt1    | 6720434DC  |
| chr1  | 1.08E+08 | 1.08E+08 | promoter-1           | promoter-1 | -83     | NM_13382 | 98432  | Phlpp1   | AI836256 I |
| chr18 | 55643877 | 55643950 | Intergenic           | Intergenic | -494079 | NM_17575 | 269023 | Zfp608   | 4932417D1  |
| chr18 | 13344777 | 13344975 | Intergenic           | Intergenic | 179377  | NM_15308 | 225192 | Hrh4     | AXOR35 B(  |
| chr1  | 46909702 | 46910075 | intron (NM           | CpG        | 466     | NM_17265 | 227059 | Slc39a10 | 2900042E1  |
| chr15 | 7928777  | 7928900  | intron (NM           | intron (NM | 120371  | NM_00108 | 545085 | Wdr70    | 4833422F0  |
| chr12 | 8928427  | 8928575  | 5' UTR (NM           | 5' UTR (NM | 388     | NM_00864 | 17775  | Laptm4a  | AA286466   |
| chr9  | 1.14E+08 | 1.14E+08 | exon (NM_            | exon (NM_  | 342     | NM_01992 | 56693  | Crtap    | 5730529N2  |
| chr9  | 1.15E+08 | 1.15E+08 | intron (NM           | intron (NM | 25405   | NM_15358 | 78893  | Cnot10   | 2600001P1  |
| chr1  | 38187027 | 38187100 | promoter-1           | promoter-1 | -556    | NM_01957 | 56210  | Rev1     | 1110027I2: |
| chr7  | 1.27E+08 | 1.27E+08 | intron (NM           | intron (NM | 14946   | NM_17340 | 233805 | Dcun1d3  | 1700020A1  |
| chr17 | 43384327 | 43384425 | Intergenic           | Intergenic | -22920  | NM_13377 | 77596  | Gpr110   | 5031409J1: |
| chr11 | 1.06E+08 | 1.06E+08 | promoter-1           | promoter-1 | -402    | NM_00113 | 83796  | Smarcd2  | AW322457   |
| chr19 | 6401352  | 6401675  | intron (NM           | CpG        | 930     | NM_01124 | 19395  | Rasgrp2  | CDC25L Ca  |
| chr12 | 1.06E+08 | 1.06E+08 | Intergenic           | Intergenic | -10394  | NM_17250 | 212073 | Syne3    | nesprin-3  |
| chr6  | 1.44E+08 | 1.44E+08 | intron (NM           | intron (NM | 197500  | NM_00111 | 20678  | Sox5     | A730017D(  |
| chr2  | 26765977 | 26767500 | promoter-1           | promoter-1 | 411     | NM_01372 | 27176  | Rpl7a    | Surf3      |
| chr17 | 51961627 | 51961750 | intron (NM           | intron (NM | 4225    | NM_00116 | 20230  | Satb1    | 2610306G1  |
| chr14 | 32150202 | 32150300 | intron (NM           | CpG        | 341     | NM_00979 | 12339  | Capn7    | AU022319   |
| chr1  | 1.68E+08 | 1.68E+08 | promoter-1           | promoter-1 | -160    | NM_03024 | 27878  | Tada1    | 2900026B1  |
| chr8  | 37330877 | 37331175 | Intergenic           | Intergenic | -18456  | NM_00108 | 244421 | Lonrf1   | -          |
| chr2  | 1.56E+08 | 1.56E+08 | intron (NM           | CpG        | 107     | NM_17721 | 16328  | Cep250   | AW490617   |
| chr7  | 73344077 | 73344150 | Intergenic           | Intergenic | 89712   | NM_00108 | 269941 | Chsy1    | mKIAA099(  |
| chr8  | 47703052 | 47703125 | promoter-1           | promoter-1 | 443     | NM_00981 | 12367  | Casp3    | A830040C1  |
| chr2  | 11470077 | 11470250 | intron (NM           | intron (NM | 5393    | NM_00117 | 170768 | Pfkfb3   | E330010H2  |
| chr18 | 35019602 | 35019700 | Intergenic           | CpG        | -1210   | NM_00791 | 13653  | Egr1     | A530045N:  |

|       |          |          |            |            |         |           |        |           |            |
|-------|----------|----------|------------|------------|---------|-----------|--------|-----------|------------|
| chr2  | 1.49E+08 | 1.49E+08 | intron (NM | intron (NM | 4720    | NM_02898  | 74533  | Gzf1      | 8430437G   |
| chr6  | 82772002 | 82772200 | Intergenic | Intergenic | -47653  | NM_01382  | 15277  | Hk2       | AI642394 I |
| chrX  | 70960652 | 70960800 | intron (NM | intron (NM | 788     | NM_01206  | 27061  | Bcap31    | Bap31      |
| chr11 | 1.02E+08 | 1.02E+08 | promoter-1 | promoter-1 | -302    | NM_00128  | 15184  | Hdac5     | AI426555 I |
| chr10 | 1.15E+08 | 1.15E+08 | promoter-1 | promoter-1 | -291    | NM_02445  | 216344 | Rab21     | 9630024B2  |
| chr3  | 1.33E+08 | 1.33E+08 | Intergenic | RMER1C C   | -177359 | NM_00104  | 214133 | Tet2      | Ayu17-449  |
| chrX  | 39755202 | 39755400 | Intergenic | Intergenic | -100484 | NM_01136  | 20400  | Sh2d1a    | Gm686 SA   |
| chr10 | 19654402 | 19654500 | exon (NM_  | exon (NM_  | 119     | NM_00858  | 26408  | Map3k5    | 7420452D2  |
| chr1  | 37357452 | 37357675 | intron (NM | intron (NM | 880     | NM_00129  | 269180 | Inpp4a    | 107kDa 96  |
| chr11 | 51355902 | 51356525 | intron (NM | intron (NM | -42046  | NM_02839  | 72947  | Phykpl    | 2900006B1  |
| chr1  | 39977527 | 39977675 | intron (NM | intron (NM | 19843   | NM_00869  | 26921  | Map4k4    | 9430080K1  |
| chr19 | 37444802 | 37445250 | Intergenic | Intergenic | -5867   | NM_01061  | 16551  | Kif11     | Eg5 Kif8 K |
| chr1  | 93196277 | 93196800 | intron (NM | intron (NM | 1623    | NM_01671  | 50880  | Scly      | 9830169HC  |
| chr4  | 1.33E+08 | 1.33E+08 | Intergenic | Intergenic | 58133   | NM_00128  | 20111  | Rps6ka1   | Mapkapk-1  |
| chr6  | 1.45E+08 | 1.45E+08 | intron (NM | intron (NM | 46606   | NM_00102  | 12035  | Bcat1     | BCATc Eca  |
| chr14 | 79834027 | 79834200 | Intergenic | Intergenic | 7795    | NM_00102  | 211255 | Kbtbd7    | 1110008PC  |
| chr7  | 1.36E+08 | 1.36E+08 | intron (NM | intron (NM | 614     | NM_00938  | 21843  | Tial1     | 5330433G1  |
| chr13 | 49404452 | 49404725 | promoter-1 | promoter-1 | -11     | NM_01575  | 30938  | Fgd3      | 5830461L0  |
| chr1  | 37273002 | 37273175 | Intergenic | Intergenic | -2035   | NM_00128  | 12790  | Cnga3     | CNG3       |
| chr5  | 1.15E+08 | 1.15E+08 | exon (NM_  | exon (NM_  | 146     | NM_00103  | 100756 | Usp30     | 6330590F1  |
| chr9  | 54317077 | 54317500 | intron (NM | intron (NM | 32145   | NM_17277  | 235380 | Dmxl2     | 6330586A1  |
| chr11 | 1.06E+08 | 1.06E+08 | promoter-1 | promoter-1 | 15      | NM_02946  | 75870  | Tcam1     | 4930570F0  |
| chr5  | 1.23E+08 | 1.23E+08 | promoter-1 | promoter-1 | -179    | NM_02688  | 68948  | Fam216a   | 1500011H2  |
| chr1  | 79226002 | 79226200 | Intergenic | Intergenic | 210564  | NM_00912  | 20254  | Scg2      | Chgc SgII  |
| chr2  | 1.23E+08 | 1.23E+08 | promoter-1 | promoter-1 | -498    | NR_027888 | 59010  | Sqrdl     | 0610039J1  |
| chr7  | 13609752 | 13609950 | 5' UTR (NM | 5' UTR (NM | 350     | NM_01158  | 21849  | Trim28    | AA408787   |
| chr1  | 1.8E+08  | 1.8E+08  | Intergenic | CpG        | -1030   | NM_00116  | 269152 | Kif26b    | 4832420M   |
| chr10 | 67984677 | 67984800 | intron (NM | RLTR33 LT  | 19885   | NM_02849  | 73287  | 1700040L0 | -          |
| chr5  | 1.23E+08 | 1.23E+08 | intron (NM | B1F2 SINE  | 16706   | NM_00119  | 207565 | Camkk2    | 6330570N1  |
| chr7  | 19930377 | 19930575 | promoter-1 | promoter-1 | 56      | NM_00794  | 13870  | Ercc1     | Ercc-1     |
| chr13 | 64120202 | 64120275 | Intergenic | Intergenic | 70271   | NM_00829  | 15487  | Hsd17b3   | -          |
| chr13 | 49062577 | 49062650 | promoter-1 | promoter-1 | 584     | NM_00103  | 218236 | Fam120a   | C9orf10 O: |
| chr11 | 1.07E+08 | 1.07E+08 | intron (NM | intron (NM | 1196    | NM_02589  | 66997  | Psmd12    | 1500002F1  |
| chr13 | 1.09E+08 | 1.09E+08 | promoter-1 | promoter-1 | 94      | NM_02804  | 71991  | Ercc8     | 2410022PC  |
| chr8  | 1.09E+08 | 1.09E+08 | intron (NM | RSINE1 SIN | 88845   | NM_17303  | 272538 | Tango6    | AW413431   |
| chr11 | 1.11E+08 | 1.11E+08 | Intergenic | Intergenic | -275046 | NM_01060  | 16517  | Kcnj16    | 6430410F1  |
| chr10 | 80569402 | 80569550 | intron (NM | intron (NM | 784     | NM_02313  | 26396  | Map2k2    | AA589381   |
| chr4  | 1.26E+08 | 1.26E+08 | intron (NM | intron (NM | 6775    | NM_00114  | 74178  | Stk40     | 2310004N1  |
| chr11 | 1.18E+08 | 1.18E+08 | promoter-1 | promoter-1 | -707    | NM_01118  | 19157  | Cyth1     | CLM1 CTH   |
| chr10 | 1.28E+08 | 1.28E+08 | intron (NM | intron (NM | 4111    | NM_17741  | 19344  | Rab5b     | C030027M   |
| chr2  | 28323677 | 28323825 | intron (NM | CpG        | 165     | NM_00116  | 118451 | Mrps2     | 1500019M   |
| chr18 | 38081502 | 38081650 | intron (NM | intron (NM | 13489   | NM_00785  | 13367  | Diap1     | D18Wsu15   |
| chr9  | 1.03E+08 | 1.03E+08 | promoter-1 | promoter-1 | -471    | NM_01976  | 56332  | Amotl2    | AW549739   |
| chr1  | 1.95E+08 | 1.95E+08 | intron (NM | L1MC4a LI  | 12653   | NM_00104  | 15483  | Hsd11b1   | -          |
| chr15 | 1.03E+08 | 1.03E+08 | intron (NM | intron (NM | 702     | NM_02646  | 67942  | Atp5g2    | 1810041M   |
| chr6  | 1.34E+08 | 1.34E+08 | intron (NM | intron (NM | 99413   | NM_00796  | 14011  | Etv6      | AW123102   |
| chr3  | 90269352 | 90269450 | exon (NM_  | exon (NM_  | 387     | NM_00872  | 18160  | Npr1      | AI893888 I |

|       |          |          |                         |         |          |        |           |            |
|-------|----------|----------|-------------------------|---------|----------|--------|-----------|------------|
| chr3  | 1.38E+08 | 1.38E+08 | intron (NMRLTR19 LT     | 999     | NM_00128 | 11532  | Adh5      | Adh-5 Adh  |
| chr10 | 38928477 | 38928900 | Intergenic Intergenic   | -45088  | NM_00112 | 327743 | Wisp3     | CCN6 ENSI  |
| chr10 | 1.28E+08 | 1.28E+08 | intron (NM intron (NM   | 1749    | NM_05407 | 116848 | Baz2a     | AA415431   |
| chr8  | 54688527 | 54688625 | intron (NM intron (NM   | 35843   | NM_14620 | 234258 | Neil3     | AI449477 I |
| chr9  | 44616927 | 44617500 | exon (NM_ exon (NM_     | -6179   | NM_13895 | 192653 | Ttc36     | -          |
| chr2  | 1.44E+08 | 1.44E+08 | 5' UTR (NM 5' UTR (NM   | 173     | NM_13362 | 81910  | Rrbp1     | 1700087NC  |
| chr7  | 74872652 | 74872875 | Intergenic MTE-int LT   | 31865   | NM_18331 | 233335 | Synm      | 4930412K2  |
| chr2  | 32837252 | 32837475 | exon (NM_ exon (NM_     | 213     | NM_01948 | 56017  | Slc2a8    | D2Ert44e   |
| chr3  | 1.46E+08 | 1.46E+08 | intron (NML1M3 LINE     | 7813    | NM_02298 | 65086  | Lpar3     | Edg7 lpA3  |
| chr3  | 1.44E+08 | 1.44E+08 | Intergenic Intergenic   | -176044 | NM_01072 | 16911  | Lmo4      | A730077C1  |
| chr8  | 93400227 | 93400400 | intron (NM intron (NM   | 47579   | NM_17722 | 109151 | Chd9      | 1810014J1  |
| chr19 | 36908377 | 36908550 | promoter-1promoter-1    | -259    | NM_00116 | 74493  | Tnks2     | 5430432P1  |
| chr18 | 23475877 | 23476225 | intron (NM intron (NM   | 7530    | NM_00128 | 13527  | Dtna      | 2210407P2  |
| chr19 | 10763352 | 10763575 | 5' UTR (NM 5' UTR (NM   | 158     | NM_18140 | 107305 | Vps37c    | 5730409F2  |
| chr1  | 1.3E+08  | 1.3E+08  | intron (NM intron (NM   | 1122    | NM_02839 | 72949  | Ccnt2     | 290004111I |
| chr2  | 1.31E+08 | 1.31E+08 | intron (NR_ intron (NR_ | 567     | NR_11099 | 69596  | Ap5s1     | 0610038L1  |
| chr3  | 1.17E+08 | 1.17E+08 | intron (NM intron (NM   | 333     | NM_00108 | 77559  | Agl       | 1110061O1  |
| chr3  | 93273602 | 93273825 | intron (NM intron (NM   | 1037    | NM_02776 | 71325  | Tchhl1    | 5430400H2  |
| chr3  | 1.38E+08 | 1.38E+08 | intron (NM intron (NM   | 12799   | NM_00103 | 70604  | Dnajb14   | 5730496F1  |
| chr1  | 92953077 | 92953200 | intron (NM intron (NM   | 3117    | NM_00851 | 16978  | Lrrfip1   | AU024550   |
| chr15 | 31471327 | 31471425 | Intergenic Intergenic   | -10584  | NM_17260 | 223455 | 6-Mar     | 3830408GC  |
| chr13 | 51476877 | 51477275 | Intergenic Intergenic   | -26911  | NM_01010 | 13610  | S1pr3     | AI132464 I |
| chr1  | 1.89E+08 | 1.89E+08 | Intergenic Intergenic   | -53294  | NM_03307 | 110957 | D1Pas1    | PI10       |
| chr7  | 1.38E+08 | 1.38E+08 | intron (NM intron (NM   | 55611   | NM_00776 | 12945  | Dmbt1     | CRP CRP-[  |
| chr17 | 63848727 | 63849425 | exon (NM_ exon (NM_     | 853     | NM_01579 | 50758  | Fbxl17    | 6330576BC  |
| chr1  | 16608402 | 16608475 | intron (NR_ intron (NR_ | 981     | NM_02577 | 66799  | Ube2w     | 6130401JO  |
| chr4  | 63070352 | 63070475 | Intergenic Intergenic   | -5934   | NM_00104 | 100182 | Akna      | AI597013 I |
| chr7  | 36019302 | 36019625 | Intergenic Intergenic   | -19099  | NM_00102 | 435965 | Lrp3      | -          |
| chr1  | 79858177 | 79858450 | Intergenic Intergenic   | -3073   | NM_00925 | 20720  | Serpine2  | B230326M   |
| chr1  | 52556952 | 52557050 | intron (NM CpG          | 291     | NM_00866 | 17936  | Nab1      | -          |
| chr19 | 11715402 | 11715525 | promoter-1promoter-1    | -122    | NM_13324 | 170813 | Ms4a3     | HTm4       |
| chr1  | 63223027 | 63223225 | promoter-1promoter-1    | 270     | NM_14551 | 227197 | Ndufs1    | 5830412M   |
| chr18 | 53405127 | 53405525 | promoter-1promoter-1    | 10      | NM_02939 | 69226  | Snx24     | 2810011K1  |
| chr7  | 35098777 | 35098850 | Intergenic Intergenic   | -28185  | NM_17274 | 233103 | 4931406P1 | AA553327   |
| chr17 | 7032627  | 7032700  | Intergenic CpG          | -45534  | NM_00951 | 22350  | Ezr       | AW146364   |
| chr8  | 1.24E+08 | 1.24E+08 | intron (NM intron (NM   | 12168   | NM_00103 | 407789 | BC048644  | -          |
| chr11 | 58073602 | 58073875 | Intergenic Intergenic   | 45259   | NM_01944 | 54396  | Irgm2     | AI481100 I |
| chr2  | 26264527 | 26264700 | promoter-1promoter-1    | 34      | NM_00129 | 64436  | Inpp5e    | 1200002L2  |
| chr8  | 37091802 | 37091950 | Intergenic Intergenic   | -66006  | NM_17291 | 244418 | D8Ert482e | 9830148H2  |
| chr11 | 61743002 | 61743100 | intron (NM intron (NM   | 708     | NM_01992 | 56697  | Akap10    | 1500031L1  |
| chr10 | 77046577 | 77046675 | intron (NM intron (NM   | 2114    | NM_14592 | 108705 | Pttg1ip   | 1810010L2  |
| chr14 | 25309552 | 25311075 | intron (NM CpG          | 410     | NM_01129 | 20088  | Rps24     | -          |
| chr4  | 1.55E+08 | 1.55E+08 | promoter-1promoter-1    | -514    | NM_02557 | 66448  | Mrpl20    | 2610008DC  |
| chr5  | 1.44E+08 | 1.44E+08 | intron (NMR SINE1 SIN   | 1465    | NM_14491 | 231871 | Daglb     | E3300361I  |
| chr6  | 72222177 | 72222325 | Intergenic Intergenic   | -32353  | NM_00128 | 20388  | Sftpb     | AI562151 I |
| chr5  | 1.45E+08 | 1.45E+08 | promoter-1promoter-1    | 132     | NM_00117 | 231872 | Aimp2     | AA407136   |
| chr5  | 42236277 | 42236400 | promoter-1promoter-1    | -784    | NM_00108 | 665775 | Bod1l     | A230054DC  |

|       |          |          |                        |         |           |        |            |            |
|-------|----------|----------|------------------------|---------|-----------|--------|------------|------------|
| chr11 | 1.01E+08 | 1.01E+08 | exon (NM_exon (NM_     | 392     | NM_02677  | 28084  | Vps25      | 1110020N1  |
| chr7  | 1.38E+08 | 1.38E+08 | intron (NM_intron (NM  | 54653   | NM_20685  | 57752  | Tacc2      | mKIAA418C  |
| chr19 | 4222227  | 4222425  | exon (NM_exon (NM_     | 7934    | NM_01995  | 56708  | Clcf1      | Bsf3 CLC   |
| chr14 | 77437952 | 77438050 | intron (NM_intron (NM  | 1422    | NM_17536  | 108811 | Ccdc122    | 4933415L0  |
| chr5  | 1.38E+08 | 1.38E+08 | intron (NM_intron (NM  | 3585    | NM_00125  | 68929  | Mospd3     | 1190005J1' |
| chr2  | 62483627 | 62483900 | exon (NM_exon (NM_     | 549     | NM_02783  | 71586  | Ifih1      | 9130009C2  |
| chr10 | 83976902 | 83977100 | Intergenic Intergenic  | 19632   | NM_17545  | 216197 | Ckap4      | 5630400AC  |
| chr16 | 33747877 | 33748075 | intron (NML1MA6 LIN    | -46147  | NM_01073  | 17063  | Muc13      | 114/A10 1  |
| chr12 | 55757002 | 55757225 | intron (NM_intron (NM  | 446     | NM_13405  | 104725 | Sptssa     | 1110002BC  |
| chr6  | 7598427  | 7598650  | Intergenic ORR1B1-in'  | 44644   | NM_01205  | 27053  | Asns       | -          |
| chr7  | 1.08E+08 | 1.08E+08 | intron (NM_intron (NM  | 7301    | NM_17707  | 320100 | Relt       | E430021K2  |
| chrX  | 11665227 | 11665400 | intron (NM_CpG         | -7634   | NM_02951  | 71458  | Bcor       | 5830466J1  |
| chr1  | 1.93E+08 | 1.93E+08 | Intergenic Intergenic  | -83393  | NM_14488  | 226849 | Ppp2r5a    | PR61alpha  |
| chr3  | 1.33E+08 | 1.33E+08 | Intergenic Intergenic  | -39309  | NM_00104  | 214133 | Tet2       | Ayu17-449  |
| chr11 | 1.16E+08 | 1.16E+08 | intron (NMPB1D10 SI    | 35970   | NM_02725  | 217340 | Rnf157     | 2610036E2  |
| chr10 | 60030052 | 60030175 | intron (NR_intron (NR_ | 129125  | NM_00125  | 22295  | Cdh23      | 4930542AC  |
| chr2  | 1.67E+08 | 1.67E+08 | Intergenic B1_Mur4 S   | -28210  | NM_01983  | 56336  | B4galt5    | 9430078I0' |
| chr13 | 43306602 | 43306675 | intron (NM_intron (NM  | -39768  | NM_00125  | 67046  | Tbc1d7     | 2610009CC  |
| chr12 | 16084127 | 16084200 | Intergenic Intergenic  | -260572 | NM_14455  | 217410 | Trib2      | AW319517   |
| chr13 | 95531577 | 95531675 | Intergenic Intergenic  | -27272  | NM_00932  | 21371  | Tbca       | Tbca13     |
| chr5  | 29896227 | 29896425 | intron (NM_CpG         | 544     | NM_13390  | 100763 | Ube3c      | AI853514 i |
| chr8  | 1.2E+08  | 1.2E+08  | intron (NM_CpG         | 223     | NM_02657  | 68133  | Gcsh       | 1100001L0  |
| chr3  | 1.29E+08 | 1.29E+08 | intron (NM_CpG         | 1834    | NM_13045  | 170439 | Elovl6     | C77826 FA  |
| chr2  | 70499477 | 70499600 | promoter-1promoter-1   | -28     | NR_02734: | 70231  | Gorasp2    | 0610011AC  |
| chr2  | 73150677 | 73150900 | promoter-1promoter-1   | 79      | NM_02902  | 74616  | Scrn3      | 4833415E2  |
| chr5  | 1.36E+08 | 1.36E+08 | Intergenic Intergenic  | -13396  | NM_01024  | 14371  | Fzd9       | mfz9       |
| chr11 | 4160902  | 4161000  | intron (NM_intron (NM  | 3380    | NM_00850  | 16878  | Lif        | -          |
| chr15 | 57807952 | 57808025 | Intergenic Intergenic  | -9470   | NM_17386  | 239463 | Fam83a     | -          |
| chr6  | 52167002 | 52167175 | exon (NM_exon (NM_     | 1484    | NM_01045  | 15404  | Hoxa7      | AV118143   |
| chr13 | 74946052 | 74946300 | promoter-1promoter-1   | 32      | NM_00130  | 12380  | Cast       | -          |
| chr6  | 4538027  | 4538175  | Intergenic LTR37A LT   | -12965  | NM_14539  | 213819 | Casd1      | Cas1 Cast1 |
| chr15 | 98859902 | 98860325 | promoter-1promoter-1   | -209    | NM_00944  | 22146  | Tuba1c     | M[a]6 Tub  |
| chr1  | 1.33E+08 | 1.33E+08 | intron (NM_intron (NM  | 13194   | NM_00855  | 17164  | Mapkapk2   | AA960234   |
| chr10 | 1.27E+08 | 1.27E+08 | intron (NM_intron (NM  | 839     | NM_03307  | 110962 | Mbd6       | D10Wsu93   |
| chr5  | 34333977 | 34334075 | Intergenic ETnERV2-ir  | -4607   | NM_00100  | 269642 | Nat8l      | 1110038OC  |
| chr5  | 1.33E+08 | 1.33E+08 | intron (NM_intron (NM  | 75112   | NM_17704  | 319974 | Auts2      | 2700063GC  |
| chr8  | 13758602 | 13758675 | intron (NM_intron (NM  | 948     | NM_02727  | 69957  | Cdc16      | 2700071J1  |
| chr14 | 45945727 | 45945800 | Intergenic Intergenic  | -3736   | NM_02595  | 67089  | Psmc6      | 2300001E0  |
| chr17 | 29169002 | 29169200 | promoter-1promoter-1   | -504    | NM_01366  | 20383  | Srsf3      | AL024116   |
| chr11 | 58767577 | 58767825 | promoter-1promoter-1   | 313     | NM_20688  | 382522 | Hist3h2bb- | 4930534G1  |
| chr7  | 1.28E+08 | 1.28E+08 | intron (NM_intron (NM  | 11779   | NM_02155  | 59052  | Mettl9     | 0610012DC  |
| chr13 | 81768552 | 81768850 | intron (NM_intron (NM  | 3442    | NM_05405  | 110789 | Gpr98      | Frings Mas |
| chr8  | 34751852 | 34752000 | intron (NM_intron (NM  | 522     | NM_17864  | 108159 | Ubxn8      | DOH8S2298  |
| chr14 | 51405052 | 51405225 | promoter-1promoter-1   | 57      | NM_17762  | 219022 | Ttc5       | -          |
| chr13 | 56105302 | 56105450 | Intergenic Intergenic  | 131535  | NM_01201  | 26914  | H2afy      | H2AF12M    |
| chr3  | 68590352 | 68590475 | Intergenic Intergenic  | -83095  | NM_00116  | 68725  | 1110032F0  | AI115547   |
| chr1  | 1.41E+08 | 1.41E+08 | promoter-1promoter-1   | -47     | NM_17264  | 226470 | Zbtb41     | 8430415N2  |

|       |          |          |                       |         |          |        |           |            |
|-------|----------|----------|-----------------------|---------|----------|--------|-----------|------------|
| chr8  | 89270102 | 89270250 | promoter-1promoter-1  | -271    | NM_00917 | 20437  | Siah1a    | AA982064   |
| chr5  | 1.09E+08 | 1.09E+08 | promoter-1promoter-1  | 395     | NM_15356 | 231580 | Gak       | D130045N:  |
| chr5  | 1.07E+08 | 1.07E+08 | promoter-1promoter-1  | -252    | NM_02685 | 52397  | Zfp644    | 1110068L0  |
| chr2  | 1.78E+08 | 1.78E+08 | intron (NMZaphod DN   | 1275    | NM_17719 | 320558 | Sycp2     | 3830402K2  |
| chr2  | 1.09E+08 | 1.09E+08 | promoter-1promoter-1  | 96      | NM_02979 | 76894  | Mettl15   | 0610027BC  |
| chr16 | 32180452 | 32180825 | intron (NMintron (NM  | 752     | NM_00103 | 328660 | Bex6      | B020003O(  |
| chr2  | 1.05E+08 | 1.05E+08 | promoter-1promoter-1  | -485    | NM_00112 | 99003  | Qser1     | 4732486I2: |
| chr1  | 1.84E+08 | 1.84E+08 | Intergenic RMER1B C   | -34656  | NM_13381 | 98386  | Lbr       | AI505894 i |
| chr2  | 1.37E+08 | 1.37E+08 | intron (NMintron (NM  | 80039   | NM_00103 | 74243  | Slx4ip    | 2210009Gz  |
| chr6  | 1.41E+08 | 1.41E+08 | intron (NMintron (NM  | 37032   | NM_00963 | 11569  | Aebp2     | AU023766   |
| chr7  | 63049627 | 63049975 | intron (NMintron (NM  | 283     | NM_14619 | 233276 | Tubgcp5   | B130010C1  |
| chr14 | 64086777 | 64086850 | Intergenic Intergenic | 31582   | NM_17762 | 219148 | Fam167a   | A030013Dz  |
| chr12 | 55263677 | 55263975 | Intergenic Intergenic | 41035   | NM_02813 | 112407 | Egln3     | 2610021GC  |
| chr4  | 1.08E+08 | 1.08E+08 | Intergenic Intergenic | 10459   | NM_02875 | 74098  | 0610037L1 | 1110008H1  |
| chr11 | 51433327 | 51433500 | exon (NM_exon (NM_    | 138     | NM_02663 | 52530  | Nhp2      | 2410130M   |
| chr17 | 57333477 | 57333700 | promoter-1promoter-1  | 16      | NM_01941 | 50930  | Tnfsf14   | HVEM-L H'  |
| chr17 | 28669277 | 28669800 | intron (NMintron (NM  | 1732    | NM_02629 | 67645  | Armc12    | 49305111I: |
| chr16 | 33056052 | 33057650 | promoter-1promoter-1  | 251     | NM_02133 | 57808  | Rpl35a    | 2810431L1  |
| chr15 | 8683327  | 8683475  | Intergenic Intergenic | -22594  | NM_14893 | 20512  | Slc1a3    | AI504299 i |
| chr6  | 83051627 | 83051700 | 5' UTR (NV 5' UTR (NV | 153     | NM_00108 | 243510 | Ccdc142   | A230058J2  |
| chr1  | 36614727 | 36614950 | intron (NMCpG         | 388     | NM_00112 | 20353  | Sema4c    | AI426163 ! |
| chr7  | 56164502 | 56164625 | Intergenic Intergenic | -28152  | NM_00101 | 108961 | E2f8      | 4432406CC  |
| chr4  | 1.4E+08  | 1.4E+08  | Intergenic HAL1-2a_N  | -1406   | NM_00111 | 72754  | Arhgef10l | 2810441CC  |
| chr9  | 44795627 | 44795800 | TTS (NM_0 TTS (NM_0   | 5844    | NM_01348 | 12500  | Cd3d      | T3d        |
| chr2  | 1.74E+08 | 1.74E+08 | promoter-1promoter-1  | -714    | NM_17267 | 228960 | Stx16     | 4930401DC  |
| chr7  | 1.35E+08 | 1.35E+08 | intron (NMintron (NM  | 7551    | NM_13335 | 76560  | Prss8     | 2410039E1  |
| chr15 | 73317752 | 73318225 | Intergenic Intergenic | -25002  | NM_00108 | 105841 | Dennd3    | AI447457 i |
| chr14 | 21666452 | 21666525 | Intergenic B3 SINE B. | 10604   | NM_00887 | 18792  | Plau      | u-PA uPA   |
| chr5  | 1.01E+08 | 1.01E+08 | intron (NMintron (NM  | 17662   | NM_02797 | 71883  | Coq2      | 2310002F1  |
| chr3  | 8969602  | 8969775  | intron (NMintron (NM  | -5634   | NM_00102 | 21985  | Tpd52     | AI043038 i |
| chr5  | 1.23E+08 | 1.23E+08 | intron (NMintron (NM  | 8181    | NM_00119 | 207565 | Camkk2    | 6330570N1  |
| chr16 | 87612327 | 87613100 | Intergenic Intergenic | 59138   | NM_14485 | 224419 | Map3k7c1  | C21orf7 O  |
| chr5  | 1.18E+08 | 1.18E+08 | intron (NMCpG         | 280     | NM_02134 | 57816  | Tesc      | 1010001A1  |
| chrX  | 1.26E+08 | 1.26E+08 | intron (NMintron (NM  | 209823  | NM_17249 | 54004  | Diap2     | Dia3 Diap1 |
| chr14 | 63380402 | 63380650 | promoter-1promoter-1  | -577    | NM_00871 | 18130  | Ints6     | 2900075H2  |
| chr8  | 59958577 | 59958775 | Intergenic Intergenic | 7981    | NM_02178 | 60406  | Sap30     | 30kDa      |
| chr11 | 49624827 | 49624925 | intron (NMintron (NM  | 17219   | NM_01352 | 14584  | Gfpt2     | AI480523 i |
| chr1  | 54969402 | 54969475 | intron (NMintron (NM  | 13793   | NM_00108 | 329154 | Ankrd44   | 4930444A1  |
| chr10 | 61971327 | 61971525 | promoter-1promoter-1  | -923    | NM_01115 | 19073  | Srgn      | Prg Prg1 S |
| chr19 | 10006227 | 10006375 | Intergenic Intergenic | -32278  | NM_01669 | 16319  | Incenp    | 2700067E2  |
| chr8  | 87246727 | 87246925 | intron (NMintron (NM  | 21470   | NM_00853 | 17095  | Lyl1      | Lyl-1 bHLH |
| chr1  | 1.71E+08 | 1.71E+08 | Intergenic Intergenic | 373207  | NM_02328 | 66977  | Nuf2      | 2410003CC  |
| chr3  | 1.07E+08 | 1.07E+08 | Intergenic Lx2A1 LINf | -13076  | NM_14648 | 258482 | Olfr266   | MOR122-2   |
| chr11 | 63779027 | 63779250 | intron (NMintron (NM  | -43352  | NM_01880 | 54710  | Hs3st3b1  | 3-OST-3B : |
| chr2  | 1.17E+08 | 1.17E+08 | promoter-1promoter-1  | -731    | NM_00127 | 114715 | Spred1    | 5730461F1  |
| chr16 | 41032377 | 41032650 | Intergenic B1F1 SINE  | -500942 | NM_17554 | 268890 | Lsamp     | 54304281I' |
| chr4  | 40917752 | 40918500 | intron (NMCpG         | 150     | NM_02373 | 74164  | Nfx1      | 1300017N1  |

|       |          |          |            |             |        |           |        |           |            |
|-------|----------|----------|------------|-------------|--------|-----------|--------|-----------|------------|
| chr1  | 97296302 | 97296425 | Intergenic | B3A SINE    | 86158  | NM_02632  | 67698  | Fam174a   | 2310044D2  |
| chr14 | 37948152 | 37948500 | promoter-1 | promoter-1  | -1     | NM_00119  | 66092  | Ghitm     | 1010001P1  |
| chr2  | 1.28E+08 | 1.28E+08 | intron (NM | intron (NM  | 28351  | NM_01690  | 53885  | Nphp1     | -          |
| chr11 | 79391477 | 79391600 | intron (NM | intron (NM  | -13176 | NM_17554  | 268451 | Rab11fip4 | A730072L0  |
| chr12 | 99497202 | 99497450 | intron (NM | CpG         | 221    | NM_00807  | 14420  | Galc      | 2310068BC  |
| chr9  | 63606427 | 63606625 | promoter-1 | promoter-1  | -725   | NM_01676  | 17127  | Smad3     | AU022421   |
| chr19 | 45235077 | 45235200 | Intergenic | Intergenic  | 9933   | NM_02190  | 21908  | Tlx1      | Hox-11 Ho  |
| chr4  | 1.16E+08 | 1.16E+08 | intron (NM | intron (NM  | 293    | NM_02814  | 72181  | Nsun4     | 231001001  |
| chr1  | 1.36E+08 | 1.36E+08 | intron (NM | CpG         | 256    | NM_00922  | 20643  | Snrpe     | AL022645   |
| chr17 | 47505777 | 47505850 | promoter-1 | promoter-1  | -23    | NM_00114  | 64657  | Mrps10    | 1110038B1  |
| chr2  | 28001277 | 28001550 | Intergenic | Intergenic  | -47200 | NM_00103  | 56177  | Olfm1     | AMY AW7    |
| chr17 | 32177452 | 32177550 | intron (NM | RSINE1 SIN  | 4394   | NM_02824  | 72462  | Rrp1b     | 2600005C2  |
| chr10 | 87866127 | 87866250 | intron (NM | Charlie1a I | 24031  | NM_00100  | 432486 | Gnptab    | EG432486   |
| chr8  | 23235302 | 23235375 | intron (NM | intron (NM  | 187    | NM_17789  | 330721 | Nek5      | 6530411J2  |
| chr11 | 60988102 | 60988175 | intron (NM | CpG         | 423    | NM_00100  | 216825 | Usp22     | AI427806   |
| chr4  | 86502227 | 86503975 | intron (NM | CpG         | 170    | NM_00909  | 20104  | Rps6      | S6R        |
| chr13 | 77970027 | 77970150 | intron (NM | Lx8 LINE L  | 122137 | NM_00116  | 68675  | Fam172a   | 1110033M   |
| chr8  | 1.22E+08 | 1.22E+08 | Intergenic | Intergenic  | -8854  | NM_01996  | 56690  | Mlycd     | AI324784 I |
| chr15 | 36426327 | 36426525 | intron (NM | CpG         | 120    | NM_17513  | 68839  | Ankrd46   | 1110054NC  |
| chr16 | 37011827 | 37011900 | promoter-1 | promoter-1  | -9     | NM_02997  | 77782  | Polq      | A430110D1  |
| chr13 | 1.05E+08 | 1.05E+08 | Intergenic | CpG         | -9251  | NM_17259  | 218543 | Srek1     | 8430401BC  |
| chr15 | 39509802 | 39509925 | intron (NM | MLT1B LTF   | 18806  | NM_00125  | 116838 | Rims2     | 28100361I! |
| chr11 | 16887827 | 16887950 | intron (NM | intron (NM  | 20833  | NM_01954  | 56193  | Plek      | 2010300B1  |
| chr4  | 1.03E+08 | 1.03E+08 | promoter-1 | promoter-1  | 68     | NM_00103  | 71148  | Mier1     | 4933425I2: |
| chr5  | 1.48E+08 | 1.48E+08 | Intergenic | Intergenic  | -10578 | NM_00125  | 76366  | Mtif3     | 2810012L1  |
| chr12 | 1.04E+08 | 1.04E+08 | exon (NM_  | exon (NM_   | 27516  | NM_02566  | 66622  | Ubr7      | 5730410I1! |
| chr4  | 1.18E+08 | 1.18E+08 | intron (NM | intron (NM  | 1122   | NM_02693  | 69072  | Ebna1bp2  | 1810014B1  |
| chr6  | 1.47E+08 | 1.47E+08 | intron (NM | (ATGGTG)n   | 2911   | NM_00128  | 272322 | Arntl2    | 4632430AC  |
| chr7  | 52884052 | 52884275 | exon (NM_  | exon (NM_   | 1256   | NM_02854  | 69903  | Rasip1    | 1110025DC  |
| chr8  | 1.26E+08 | 1.26E+08 | promoter-1 | promoter-1  | 346    | NR_03786! | 77087  | Ankrd11   | 2410104C1  |
| chr1  | 1.59E+08 | 1.59E+08 | Intergenic | Intergenic  | -1772  | NM_14541  | 215015 | Fam20b    | C530043G2  |
| chr1  | 1.29E+08 | 1.29E+08 | Intergenic | Intergenic  | -46992 | NM_17695  | 210356 | Nckap5    | 8430408F2  |
| chr3  | 84470952 | 84471025 | intron (NM | RMER1B C    | 874    | NM_17726  | 320782 | Tmem154   | 9930117HC  |
| chr2  | 1.48E+08 | 1.48E+08 | exon (NM_  | exon (NM_   | 1661   | NM_00937  | 21824  | Thbd      | AI385582 I |
| chr5  | 97221452 | 97221525 | promoter-1 | promoter-1  | -916   | NM_01347  | 11745  | Anxa3     | Anx3       |
| chr8  | 1.23E+08 | 1.23E+08 | Intergenic | Intergenic  | -43440 | NM_19867  | 382034 | Gse1      | 22100131I! |
| chr11 | 1.11E+08 | 1.11E+08 | Intergenic | Intergenic  | 22698  | NM_00842  | 16518  | Kcnj2     | IRK1 Kcnf1 |
| chr11 | 84936952 | 84937050 | intron (NM | intron (NM  | 16456  | NM_00102  | 237898 | Usp32     | 2900074J0. |
| chr5  | 1.09E+08 | 1.09E+08 | promoter-1 | promoter-1  | -247   | NM_00116  | 116701 | Fgfr1     | FGFR5 FGF  |
| chr4  | 11118052 | 11118275 | promoter-1 | promoter-1  | -335   | NM_00103  | 12448  | Ccne2     | -          |
| chr9  | 66124752 | 66124950 | Intergenic | Intergenic  | -73406 | NM_14561  | 235439 | Herc1     | 2810449H1  |
| chr8  | 1.31E+08 | 1.31E+08 | Intergenic | Intergenic  | -1310  | NM_00873  | 18186  | Nrp1      | C530029I0: |
| chr5  | 1.08E+08 | 1.08E+08 | intron (NM | CpG         | 5825   | NM_00796  | 14020  | Evi5      | NB4S       |
| chr3  | 32607652 | 32608025 | intron (NM | CpG         | 370    | NM_01967  | 56456  | Actl6a    | 2810432CC  |
| chr14 | 87816752 | 87816850 | intron (NM | CpG         | 411    | NM_00125  | 219249 | Tdrd3     | 4732418CC  |
| chr9  | 77764977 | 77765050 | promoter-1 | promoter-1  | -159   | NM_13425  | 68801  | Elovl5    | 1110059L2  |
| chr13 | 9418452  | 9418725  | intron (NM | intron (NM  | 142817 | NM_00108  | 208440 | Dip2c     | 2900024P2  |

|       |          |          |                       |         |          |        |          |             |
|-------|----------|----------|-----------------------|---------|----------|--------|----------|-------------|
| chr4  | 1.39E+08 | 1.39E+08 | intron (NM CpG        | 162     | NM_00103 | 12345  | Capzb    | 1700120CC   |
| chr9  | 1.01E+08 | 1.01E+08 | exon (NM_exon (NM_    | 552     | NM_00110 | 77853  | Msl2     | E130103E0   |
| chr4  | 1.39E+08 | 1.39E+08 | intron (NM CpG        | 264     | NM_00116 | 69116  | Ubr4     | 1810009A1   |
| chr11 | 95153852 | 95153925 | intron (NM intron (NM | 17672   | NM_00119 | 217127 | Kat7     | Hbo1 Hboi   |
| chr12 | 35669927 | 35670050 | exon (NM_exon (NM_    | 555     | NM_02929 | 75456  | Prps11l  | 1700011K1   |
| chr10 | 84084952 | 84085275 | promoter-1promoter-1  | -69     | NM_02742 | 70428  | Polr3b   | 2700078HC   |
| chr13 | 58229377 | 58229525 | exon (NM_exon (NM_    | 466     | NM_02987 | 77134  | Hnrnpa0  | 1110055BC   |
| chr18 | 12280302 | 12280475 | promoter-1promoter-1  | -342    | NM_00128 | 338363 | Tmem241  | 6030446N2   |
| chr9  | 1.23E+08 | 1.23E+08 | promoter-1promoter-1  | 147     | NM_02691 | 69035  | Zdhhc3   | 1110020O2   |
| chr5  | 53840952 | 53841175 | Intergenic Intergenic | -105955 | NM_00108 | 19664  | Rbpj     | AI843960 I  |
| chr5  | 1.06E+08 | 1.06E+08 | Intergenic RLTR13D3   | -21868  | NM_00103 | 433926 | Lrrc8b   | R75581 Ta   |
| chr1  | 10222027 | 10222100 | intron (NM intron (NM | 688     | NM_00110 | 211673 | Arfgef1  | ARFGEP1 E   |
| chrY  | 1790652  | 1790775  | Intergenic Lx3A LINE  | -64296  | NM_00111 | 1E+08  | Gm16501  | ENSMUSGC    |
| chr17 | 27148877 | 27149075 | Intergenic MTEa LTR   | -6004   | NM_00125 | 70772  | Ggnbp1   | 0610031GC   |
| chr15 | 97616352 | 97616500 | intron (NM intron (NM | 1630    | NM_02635 | 67739  | Slc48a1  | 4930570CC   |
| chr14 | 22771927 | 22772150 | Intergenic Intergenic | 36785   | NM_14545 | 218820 | Zfp503   | AI181838 I  |
| chr3  | 1.02E+08 | 1.02E+08 | Intergenic Intergenic | 104584  | NM_01360 | 18049  | Ngf      | Ngfb        |
| chr19 | 43827577 | 43827700 | promoter-1promoter-1  | 125     | NM_02553 | 66388  | Cutc     | 23100391I   |
| chr1  | 72555927 | 72556050 | intron (NM intron (NM | 27150   | NM_00104 | 381270 | 4-Mar    | BC056494    |
| chr10 | 79390752 | 79390925 | intron (NM intron (NM | 752     | NM_00128 | 13496  | Arid3a   | Bright Dri1 |
| chr17 | 71824252 | 71824425 | exon (NM_exon (NM_    | 345     | NM_02888 | 74355  | Smchd1   | 4931400A1   |
| chr4  | 1.2E+08  | 1.2E+08  | 5' UTR (NV 5' UTR (NV | 158     | NM_00127 | 18046  | Nfyc     | -           |
| chr1  | 36425327 | 36425900 | intron (NM CpG        | 413     | NM_17265 | 226976 | Kansl3   | 4632411B1   |
| chr6  | 1.27E+08 | 1.27E+08 | Intergenic L3b LINE C | -56680  | NM_00103 | 381812 | Cracr2a  | Efcab4b Gi  |
| chr7  | 30954527 | 30954600 | promoter-1promoter-1  | 183     | NM_01198 | 26465  | Zfp146   | OZF Znf14   |
| chr8  | 95007127 | 95007525 | Intergenic Intergenic | 125631  | NM_01882 | 54352  | Irx5     | -           |
| chr13 | 55422452 | 55422600 | promoter-1promoter-1  | 815     | NM_00900 | 19336  | Rab24    | 6530406OC   |
| chr14 | 56441652 | 56442000 | Intergenic Intergenic | -1806   | NM_00116 | 73181  | Nfatc4   | 3110041HC   |
| chr10 | 95200427 | 95200600 | Intergenic Intergenic | -173712 | NM_02772 | 71207  | Nudt4    | 4933436C1   |
| chr4  | 46498752 | 46498900 | Intergenic Intergenic | -3375   | NM_05317 | 94181  | Nans     | 4632418E0   |
| chr1  | 43990452 | 43990925 | promoter-1promoter-1  | -164    | NM_00941 | 22019  | Tpp2     | TPP-2 Tppl  |
| chr8  | 77517327 | 77517975 | promoter-1promoter-1  | 49      | NM_17801 | 70823  | Hmgxb4   | 4733401KC   |
| chr1  | 1.87E+08 | 1.87E+08 | Intergenic Intergenic | -2804   | NM_00825 | 15284  | Hlx      | Hlx1        |
| chr7  | 53128827 | 53129150 | intron (NM intron (NM | 778     | NM_13395 | 68137  | Kdelr1   | 8030486F0   |
| chr3  | 1.07E+08 | 1.07E+08 | 5' UTR (NV 5' UTR (NV | 190     | NM_14554 | 229709 | Ahcyl1   | 1110034F2   |
| chr7  | 86047627 | 86047900 | intron (NM intron (NM | 6950    | NM_00116 | 68048  | Aen      | 2700083BC   |
| chr5  | 24606352 | 24606425 | promoter-1promoter-1  | 72      | NM_14540 | 108099 | Prkag2   | 2410051C1   |
| chr11 | 1.03E+08 | 1.03E+08 | intron (NM intron (NM | 643     | NM_18328 | 544817 | Arhgap27 | 2310069IO   |
| chr10 | 7736577  | 7736675  | Intergenic Intergenic | -60705  | NM_13866 | 68652  | Tab2     | 1110030NC   |
| chr1  | 74202127 | 74202225 | intron (NM intron (NM | 1608    | NM_00990 | 12765  | Cxcr2    | CD128 CD    |
| chr19 | 29444677 | 29444900 | intron (NM MER20 DN   | 2860    | NM_02189 | 60533  | Cd274    | A530045L1   |
| chr16 | 14132102 | 14132250 | intron (NM intron (NM | 27191   | NM_00108 | 223989 | Marf1    | 4921513D2   |
| chr10 | 59723577 | 59723650 | Intergenic Intergenic | -16763  | NM_00114 | 19156  | Psap     | AI037048 !  |
| chr14 | 56262002 | 56262550 | 5' UTR (NV 5' UTR (NV | 367     | NM_02878 | 74140  | Tm9sf1   | 1200014DC   |
| chr18 | 74518127 | 74518325 | intron (NR_LTRIS_Mus  | 75472   | NM_02894 | 74453  | Ccdc11   | 4933415IO   |
| chr14 | 52877202 | 52877300 | Intergenic CpG        | -20004  | NM_20163 | 67772  | Chd8     | 5830451P1   |
| chr14 | 31814377 | 31814575 | promoter-1promoter-1  | -103    | NM_00116 | 76485  | Glt8d1   | 2410004HC   |



|       |          |          |                     |            |         |           |        |            |             |
|-------|----------|----------|---------------------|------------|---------|-----------|--------|------------|-------------|
| chr18 | 44989052 | 44989225 | intron (NM          | intron (NM | 819     | NM_00116  | 240255 | Ythdc2     | 3010002F0   |
| chr9  | 1.22E+08 | 1.22E+08 | promoter-1          | promoter-1 | -154    | NM_17867  | 215474 | Sec22c     | 4932412K2   |
| chr16 | 48799652 | 48799975 | Intergenic          | Intergenic | -17156  | NM_02388  | 57263  | Retnlb     | 9030012B2   |
| chr4  | 1.33E+08 | 1.33E+08 | Intergenic          | Intergenic | -12610  | NM_15342  | 242687 | Wasf2      | AW742646    |
| chr7  | 74280027 | 74280325 | intron (NM          | intron (NM | -87254  | NM_17521  | 75099  | Lysmd4     | 4930506D2   |
| chr3  | 97705002 | 97705175 | promoter-1          | promoter-1 | -62     | NM_01134  | 20333  | Sec22b     | 4930564D1   |
| chr15 | 1.01E+08 | 1.01E+08 | Intergenic          | Intergenic | -20014  | NM_01044  | 15370  | Nr4a1      | GFRP1 Gfr   |
| chr2  | 1.65E+08 | 1.65E+08 | promoter-1          | promoter-1 | 324     | NM_17837  | 67538  | Zswim3     | 4921517AC   |
| chr15 | 65951927 | 65952200 | intron (NM          | intron (NM | -143697 | NM_00114  | 654498 | Hhla1      | F930104E1   |
| chr12 | 32319527 | 32319800 | promoter-1          | promoter-1 | -140    | NM_00116  | 12033  | Bcap29     | AW208404    |
| chr7  | 1.07E+08 | 1.07E+08 | Intergenic          | Intergenic | 14677   | NM_14635  | 258353 | Olfr521    | MOR101-2    |
| chr4  | 94881977 | 94882225 | Intergenic          | RMER19C    | -163188 | NM_01059  | 16476  | Jun        | AP-1 Junc   |
| chr14 | 52487277 | 52487450 | Intergenic          | Intergenic | 13690   | NM_01738  | 53873  | Ear7       | mR7         |
| chr3  | 1.58E+08 | 1.58E+08 | promoter-1          | promoter-1 | -754    | NM_00101  | 433667 | Ankrd13c   | AI505652 ,  |
| chr8  | 75071802 | 75072025 | 5' UTR (NV          | 5' UTR (NV | 296     | NM_02748  | 70625  | Med26      | 5730493L1   |
| chr16 | 30171527 | 30171900 | Intergenic          | Intergenic | 95905   | NM_02790  | 71756  | Cpn2       | 1300018K1   |
| chr17 | 8828702  | 8828900  | intron (NM          | intron (NM | 109135  | NM_00129  | 23984  | Pde10a     | -           |
| chr14 | 57506227 | 57506450 | promoter-1          | promoter-1 | -294    | NM_02949  | 76007  | Zmym2      | 5830413PC   |
| chr11 | 93746627 | 93746750 | promoter-1          | promoter-1 | 392     | NM_00101  | 217109 | Utp18      | 6230425C2   |
| chr7  | 1.48E+08 | 1.48E+08 | Intergenic          | Intergenic | 20605   | NM_02537  | 66141  | Ifitm3     | 1110004CC   |
| chr14 | 1.04E+08 | 1.04E+08 | Intergenic          | Intergenic | 50030   | NM_00790  | 13618  | Ednrb      | ET-B ET-BF  |
| chr1  | 66910102 | 66910275 | promoter-1          | promoter-1 | -305    | NM_00738  | 11363  | Acadl      | AA960361    |
| chr3  | 54433252 | 54433375 | Intergenic          | B1_Mur1 :  | -63714  | NM_01999  | 56790  | Supt20     | AA667204    |
| chr17 | 12700052 | 12700125 | exon (NM_           | exon (NM_  | 482     | NM_01139  | 20519  | Slc22a3    | EMT Oct3    |
| chr4  | 14753302 | 14753425 | intron (NM          | intron (NM | 371     | NM_15281  | 72201  | Otud6b     | 2600013N1   |
| chr3  | 1.3E+08  | 1.3E+08  | Intergenic          | Intergenic | -12313  | NM_20720  | 99683  | Sec24b     | AI605202 :  |
| chr2  | 56976652 | 56976775 | promoter-1          | promoter-1 | -299    | NM_00113  | 18227  | Nr4a2      | HZF-3 NOT   |
| chr9  | 65738402 | 65738500 | intron (NM          | intron (NM | 321     | NM_02651  | 68026  | 2810417H1  | AA409629    |
| chr11 | 1.01E+08 | 1.01E+08 | intron (NM          | intron (NM | 7874    | NM_21366  | 20848  | Stat3      | 1110034CC   |
| chr10 | 80958927 | 80959000 | exon (NM_           | exon (NM_  | 145     | NM_13400  | 103425 | Ncln       | 3100002P1   |
| chr7  | 20158752 | 20158875 | promoter-1          | promoter-1 | -121    | NM_02718  | 69731  | Gemin7     | 240000810   |
| chr2  | 57482052 | 57482175 | Intergenic          | (TTAGGG)n  | -368453 | NM_17285  | 241391 | Galnt5     | 4832424J2   |
| chr1  | 88337702 | 88337825 | Intergenic          | Intergenic | 14859   | NM_02796  | 71863  | 170001901- | -           |
| chr1  | 1.83E+08 | 1.83E+08 | intron (NM          | CpG        | 183     | NM_00821  | 15078  | H3f3a      | H3.3A       |
| chr6  | 1.03E+08 | 1.03E+08 | Intergenic          | Intergenic | -38294  | NM_00769  | 12661  | Chl1       | A530023M    |
| chr6  | 1.43E+08 | 1.43E+08 | Intergenic          | Intergenic | 15225   | NM_00842  | 16523  | Kcnj8      | AI448900    |
| chr19 | 46380577 | 46380650 | intron (NM          | intron (NM | 193     | NM_00117  | 18034  | Nfkb2      | NF-kappaB   |
| chr6  | 1.49E+08 | 1.49E+08 | promoter-1          | promoter-1 | -34     | NM_00125  | 320204 | Mettl20    | 4833442J1   |
| chr15 | 57624877 | 57624975 | intron (NM          | intron (NM | 98704   | NM_19944  | 387609 | Zhx2       | Afr-1 Afr1  |
| chr3  | 24462902 | 24463075 | Intergenic          | RMER16-in  | 1589241 | NM_00116  | 192167 | Nlgn1      | 6330415NC   |
| chr3  | 96801827 | 96801900 | Intergenic          | Intergenic | -34462  | NM_00127  | 14613  | Gja5       | 5730555N1   |
| chr5  | 92804527 | 92804850 | intron (NM          | intron (NM | -12366  | NR_038116 | 56066  | Cxcl11     | Cxc11 H17   |
| chr11 | 62283977 | 62284300 | intron (NML1MB4 LIN |            | 12176   | NM_00103  | 327942 | Pigl       | Gm737       |
| chr10 | 1.11E+08 | 1.11E+08 | exon (NM_           | exon (NM_  | 10607   | NM_02860  | 73690  | Glipr1     | 2410114O1   |
| chr5  | 64689577 | 64689750 | intron (NM          | intron (NM | 68067   | NM_00128  | 57915  | Tbc1d1     | 1110062GC   |
| chr6  | 1.47E+08 | 1.47E+08 | Intergenic          | Intergenic | -69481  | NM_00897  | 19227  | Pthlh      | PTH-like Pi |
| chr2  | 21728277 | 21728500 | intron (NM          | Lx8 LINE L | -420742 | NM_14841  | 667663 | Myo3a      | 9030416PC   |

|       |          |          |                      |         |          |        |          |            |
|-------|----------|----------|----------------------|---------|----------|--------|----------|------------|
| chr7  | 1.48E+08 | 1.48E+08 | promoter-1promoter-1 | -47     | NM_00103 | 213002 | Ifitm6   | A330075D   |
| chr9  | 64302127 | 64302350 | intron (NM           | 68805   | NM_00113 | 214058 | Megf11   | 2410080H   |
| chr10 | 75495802 | 75495925 | intron (NM           | 506     | NM_17747 | 64453  | Zfp280b  | D10Jhu82e  |
| chr15 | 90998352 | 90998500 | intron (NM           | 23812   | NM_01199 | 26874  | Abcd2    | ABC39 AL   |
| chr13 | 1.01E+08 | 1.01E+08 | Intergenic (TG)n Sim | 140925  | NM_01373 | 27220  | Cartpt   | Cart       |
| chr10 | 42741227 | 42741375 | exon (NM_            | 153035  | NM_17540 | 109205 | Sobp     | 2900009C1  |
| chr10 | 1.28E+08 | 1.28E+08 | promoter-1promoter-1 | -127    | NM_01995 | 56530  | Cnpy2    | 5330432A1  |
| chr17 | 43013302 | 43013550 | promoter-1promoter-1 | -53     | NM_00984 | 12488  | Cd2ap    | AL024079   |
| chr13 | 59788952 | 59789175 | 3' UTR (NM           | 6399    | NM_18329 | 70900  | 4921517D | -          |
| chr5  | 1.41E+08 | 1.41E+08 | promoter-1promoter-1 | -821    | NM_13391 | 27979  | Eif3b    | AL033316   |
| chr5  | 1.11E+08 | 1.11E+08 | promoter-1promoter-1 | -298    | NM_00112 | 231605 | Galnt9   | GalNAc-T9  |
| chr14 | 21553502 | 21553750 | TTS (NM_1            | 158     | NM_01081 | 17423  | Ndst2    | Mndns ND   |
| chr3  | 21861252 | 21861450 | Intergenic           | -114223 | NM_03073 | 81004  | Tbl1xr1  | 8030499H   |
| chr9  | 57115977 | 57116150 | Intergenic           | -5657   | NM_02882 | 74211  | 1700017B | AA682102   |
| chr11 | 97579677 | 97579925 | 3' UTR (NM           | 15053   | NM_01197 | 26446  | Psmb3    | AL033320   |
| chr7  | 1.38E+08 | 1.38E+08 | intron (NM           | -34832  | NM_02131 | 57752  | Tacc2    | mKIAA418   |
| chr11 | 78687052 | 78687125 | Intergenic           | 46991   | NM_00107 | 66274  | Lym9     | 1810012P1  |
| chr6  | 1.23E+08 | 1.23E+08 | intron (NM           | 2560    | NM_00100 | 381809 | Clec4b2  | Aplra1 F8  |
| chr15 | 76149877 | 76150025 | Intergenic           | -7876   | NM_17539 | 109075 | Exosc4   | 11100390!  |
| chr11 | 17899427 | 17899575 | Intergenic           | -45623  | NM_02657 | 68145  | Etaa1    | 5730466H   |
| chr3  | 1.16E+08 | 1.16E+08 | intron (NM           | 516     | NM_01002 | 13171  | Dbt      | D3Wsu60e   |
| chr8  | 98424752 | 98426450 | Intergenic           | -13336  | NM_01032 | 14719  | Got2     | AL022787   |
| chr2  | 22750577 | 22751025 | promoter-1promoter-1 | -241    | NM_01950 | 56075  | Pdss1    | 2610203G   |
| chr1  | 55272327 | 55272600 | intron (NM           | 11163   | NM_02871 | 74013  | Rftn2    | 2700010E0  |
| chr4  | 6119277  | 6119350  | intron (NM           | 1061    | NM_02653 | 68053  | Ubxn2b   | 3110003A   |
| chr9  | 62191177 | 62191250 | intron (NM           | 2063    | NM_00967 | 11737  | Anp32a   | Anp32 I1P  |
| chr9  | 1.18E+08 | 1.18E+08 | promoter-1promoter-1 | -24     | NM_02644 | 67899  | Cmc1     | 2010110K1  |
| chr1  | 1.2E+08  | 1.2E+08  | intron (NM           | -60084  | NM_02375 | 81879  | Tfcp2l1  | 1810030F0  |
| chr3  | 95621902 | 95622000 | intron (NM           | 925     | NM_00108 | 75137  | Rprd2    | 2810036A1  |
| chr19 | 37511227 | 37511500 | intron (NM           | 2032    | NM_00824 | 15242  | Hhex     | Hex Hex1   |
| chr14 | 37263402 | 37263675 | Intergenic           | 355387  | NM_17500 | 218921 | 4930474N | -          |
| chr9  | 58429252 | 58429375 | promoter-1promoter-1 | -734    | NM_00129 | 20320  | Nptn     | AW554172   |
| chr11 | 77990352 | 77990475 | promoter-1promoter-1 | -245    | NM_08084 | 140859 | Nek8     | 4632401F2  |
| chr10 | 5734577  | 5734750  | promoter-1promoter-1 | -168    | NM_00795 | 13982  | Esr1     | AA420328   |
| chr14 | 21871102 | 21871400 | promoter-1promoter-1 | 413     | NM_01882 | 55946  | Ap3m1    | 1200013D   |
| chr14 | 73562202 | 73562575 | intron (NR_          | 19796   | NR_03318 | 105670 | Rcbtb2   | 2610028E0  |
| chr11 | 97883877 | 97884150 | promoter-1promoter-1 | -72     | NM_00128 | 12295  | Cacnb1   | CAB1 Ccht  |
| chr12 | 83348602 | 83348925 | intron (NM           | -63573  | NM_17257 | 217692 | Sipa1l1  | 4931426N1  |
| chr4  | 1.48E+08 | 1.48E+08 | intron (NM           | 404     | NM_00927 | 20810  | Srm      | AA407669   |
| chr12 | 71209152 | 71209275 | intron (NM           | 3403    | NR_10439 | 18080  | Nin      | 3110068G   |
| chr5  | 1.24E+08 | 1.24E+08 | intron (NM           | 1956    | NM_02985 | 77045  | Bcl7a    | 4432415N   |
| chr11 | 1.2E+08  | 1.2E+08  | intron (NM           | 2948    | NM_01075 | 17134  | Mafg     | AA545192   |
| chr7  | 26023902 | 26024050 | Intergenic           | -1106   | NM_00103 | 606496 | Gsk3a    | 2700086H   |
| chr2  | 1.04E+08 | 1.04E+08 | Intergenic           | -10951  | NM_00114 | 16909  | Lmo2     | Rbtn-2 Rbt |
| chr4  | 1.41E+08 | 1.41E+08 | Intergenic           | 26313   | NM_00116 | 74202  | Fblim1   | 2410043F0  |
| chr4  | 1.48E+08 | 1.48E+08 | promoter-1promoter-1 | -496    | NM_00927 | 20810  | Srm      | AA407669   |
| chr4  | 1.25E+08 | 1.25E+08 | Intergenic           | -14020  | NM_14555 | 230737 | Gnl2     | BC003262   |

|       |          |          |            |            |         |           |        |            |             |
|-------|----------|----------|------------|------------|---------|-----------|--------|------------|-------------|
| chr4  | 97723177 | 97723350 | intron (NM | intron (NM | 278946  | NM_01090  | 18027  | Nfia       | 1110047K1   |
| chr3  | 52302852 | 52303025 | Intergenic | Intergenic | 230679  | NM_01973  | 56458  | Foxo1      | AI876417    |
| chr5  | 34978902 | 34979100 | intron (NM | intron (NM | 762     | NM_02666  | 68294  | Mfsd10     | 06100090C   |
| chr15 | 89260827 | 89260950 | promoter-1 | promoter-1 | -530    | NR_03715: | 12651  | Chkb       | Chetk Chkl  |
| chr9  | 96602402 | 96602700 | intron (NM | intron (NM | 29543   | NM_17553  | 245007 | Zbtb38     | A930014KC   |
| chr1  | 1.01E+08 | 1.01E+08 | Intergenic | Intergenic | 299650  | NM_02758  | 70866  | Slco6d1    | 492151110!  |
| chr15 | 99251177 | 99251250 | Intergenic | Intergenic | 27563   | NM_00117  | 110213 | Tmbim6     | 5031406PC   |
| chr6  | 1.24E+08 | 1.24E+08 | promoter-1 | promoter-1 | -7      | NM_00127  | 19305  | Pex5       | AW212715    |
| chr9  | 59336077 | 59336150 | Intergenic | Intergenic | -1932   | NM_01992  | 23806  | Arih1      | AU021774    |
| chr2  | 1.65E+08 | 1.65E+08 | intron (NM | intron (NM | 4266    | NM_08028  | 140579 | Elmo2      | 1190002F2   |
| chr17 | 57487152 | 57487225 | Intergenic | RSINE1 SIN | -10921  | NM_01013  | 13733  | Emr1       | DD7A5-7 E   |
| chr1  | 39424252 | 39425900 | exon (NM_  | exon (NM_  | 380     | NM_00125  | 114641 | Rpl31      | -           |
| chr16 | 4674302  | 4674550  | intron (NM | intron (NM | 5294    | NM_03020  | 78885  | Coro7      | 0610011B1   |
| chr7  | 1.34E+08 | 1.34E+08 | intron (NM | intron (NM | 6020    | NM_08063  | 78388  | Mvp        | 2310009M    |
| chr14 | 70750802 | 70750875 | intron (NM | CpG        | 393     | NM_14480  | 213053 | Slc39a14   | FAD-123 Z   |
| chr11 | 72271777 | 72272050 | intron (NM | intron (NM | 16616   | NM_00127  | 216892 | Spns2      | -           |
| chr1  | 1.36E+08 | 1.36E+08 | intron (NM | intron (NM | 4757    | NM_02832  | 72674  | Adipor1    | 2810031L1   |
| chr14 | 67486902 | 67487150 | promoter-1 | promoter-1 | 411     | NM_00995  | 12934  | Dpysl2     | AI851130 f  |
| chr11 | 95120377 | 95120550 | Intergenic | CpG        | -2380   | NM_05309  | 93670  | Tac4       | AW489379    |
| chr2  | 1.3E+08  | 1.3E+08  | intron (NM | CpG        | 349     | NM_00922  | 20638  | Snrpb      | AL024368    |
| chr7  | 26954077 | 26954350 | Intergenic | Intergenic | -4215   | NM_01000  | 13094  | Cyp2b9     | Cyp2b       |
| chr13 | 94709927 | 94710025 | intron (NM | intron (NM | -117775 | NM_17258  | 218454 | Lhfp12     | 6030465B1   |
| chr11 | 80191327 | 80191775 | promoter-1 | promoter-1 | -34     | NM_02747  | 70591  | 5730455P1- | -           |
| chr18 | 35758002 | 35758075 | promoter-1 | promoter-1 | -283    | NM_02642  | 67869  | Paip2      | 2310050K1   |
| chr16 | 16896227 | 16896700 | promoter-1 | promoter-1 | -99     | NM_17683  | 68606  | Ppm1f      | 1110021B1   |
| chr3  | 85376252 | 85376625 | Intergenic | Intergenic | -1613   | NM_14489  | 229487 | Pet112     | 9430026F0   |
| chr11 | 1.15E+08 | 1.15E+08 | intron (NM | intron (NM | 393     | NM_00116  | 246746 | Cd300lf    | CLIM1 CLN   |
| chr9  | 1.14E+08 | 1.14E+08 | Intergenic | ORR1B1 L1  | -2076   | NM_00108  | 22221  | Ubp1       | Cp2b LBP-   |
| chr1  | 1.56E+08 | 1.56E+08 | TTS (NR_1C | TTS (NR_1C | 204     | NM_00813  | 14645  | Glul       | GS Glns     |
| chr2  | 49665052 | 49665150 | intron (NM | intron (NM | 21895   | NM_02799  | 71897  | Lypd6b     | 2310010M    |
| chrX  | 50264977 | 50265150 | promoter-1 | promoter-1 | -328    | NM_02764  | 70998  | Phf6       | 2700007B1   |
| chr2  | 30663602 | 30663700 | intron (NM | CpG        | 154     | NM_17059  | 66617  | Ntmt1      | 2610205E2   |
| chr3  | 1.32E+08 | 1.32E+08 | intron (NM | intron (NM | 18295   | NM_02026  | 56811  | Dkk2       | -           |
| chr15 | 1.02E+08 | 1.02E+08 | Intergenic | Intergenic | -6509   | NM_01367  | 20683  | Sp1        | 1110003E1   |
| chr13 | 68927827 | 68928125 | intron (NM | ID_B1 SINI | 191660  | NM_02703  | 69315  | 1700001L1- | -           |
| chr2  | 48595252 | 48595400 | Intergenic | Intergenic | -74303  | NM_00739  | 11480  | Acvr2a     | Actr1la Acv |
| chr6  | 1.15E+08 | 1.15E+08 | promoter-1 | promoter-1 | 37      | NM_00112  | 19016  | Pparg      | Nr1c3 PPA   |
| chr16 | 35982527 | 35982600 | promoter-1 | promoter-1 | -886    | NM_00846  | 16646  | Kpna1      | AW494490    |
| chr13 | 96661327 | 96661450 | intron (NM | intron (NM | 489     | NM_02771  | 544963 | Iqgap2     | 4933417J2   |
| chr4  | 32743802 | 32743950 | promoter-1 | promoter-1 | -218    | NM_00108  | 100019 | Mdn1       | 4833432B2   |
| chr3  | 82622377 | 82622600 | Intergenic | Intergenic | 57917   | NM_00127  | 633285 | Rbm46      | EG633285    |
| chr18 | 55067702 | 55068025 | intron (NM | intron (NM | 81971   | NM_17575  | 269023 | Zfp608     | 4932417D1   |
| chr11 | 82683752 | 82684025 | intron (NM | intron (NM | 358     | NM_00116  | 67338  | Rffl       | 1700051E0   |
| chr8  | 73159652 | 73159725 | Intergenic | Intergenic | -4154   | NM_01181  | 23886  | Gdf15      | MIC-1 NAC   |
| chr9  | 78379652 | 78380000 | Intergenic | Intergenic | -50295  | NM_01010  | 13627  | Eef1a1     | -           |
| chr7  | 20108952 | 20109175 | exon (NM_  | exon (NM_  | 4983    | NM_02711  | 69547  | Nkpd1      | 2310015GC   |
| chr11 | 8728852  | 8729150  | Intergenic | Intergenic | -164463 | NM_00108  | 319939 | Tns3       | BC023928    |

|       |          |          |            |            |         |          |        |          |            |
|-------|----------|----------|------------|------------|---------|----------|--------|----------|------------|
| chr4  | 34833677 | 34833775 | Intergenic | Intergenic | -3529   | NM_01388 | 30046  | Zfp292   | 5730450DC  |
| chr1  | 1.08E+08 | 1.08E+08 | promoter-1 | promoter-1 | 505     | NM_13382 | 98432  | Phlpp1   | AI836256 I |
| chr2  | 38863602 | 38863875 | promoter-1 | promoter-1 | 79      | NM_02880 | 74192  | Arpc5l   | 2010015JO  |
| chr1  | 64270027 | 64270175 | Intergenic | Intergenic | -102138 | NM_03356 | 93691  | Klf7     | 9830124PC  |
| chr11 | 57822902 | 57823375 | intron (NM | CpG        | 572     | NM_02845 | 73158  | Larp1    | 1810024J1  |
| chr3  | 1.01E+08 | 1.01E+08 | Intergenic | Intergenic | -2165   | NM_00116 | 229644 | Trim45   | 4921530NC  |
| chr1  | 66568577 | 66568850 | intron (NM | intron (NM | 53692   | NM_17551 | 329178 | Unc80    | C030018G1  |
| chr5  | 1.11E+08 | 1.11E+08 | exon (NM_  | exon (NM_  | 462     | NM_00946 | 22241  | Ulk1     | AU041434   |
| chr16 | 8671277  | 8671375  | intron (NM | intron (NM | 920     | NM_02582 | 52502  | Carhsp1  | 1200011KC  |
| chr19 | 46692777 | 46693075 | intron (NM | intron (NM | -4965   | NM_00117 | 226178 | Wbp1l    | D19Wsu16   |
| chr11 | 4965452  | 4965525  | promoter-1 | promoter-1 | -158    | NM_00119 | 78926  | Gas2l1   | 4930500E2  |
| chr4  | 11893052 | 11893225 | promoter-1 | promoter-1 | -10     | NM_00129 | 381511 | Pdp1     | Gm1024 P   |
| chr8  | 73140327 | 73140500 | promoter-1 | promoter-1 | -330    | NM_15307 | 211228 | Lrrc25   | Mapa       |
| chr7  | 30295552 | 30295650 | Intergenic | Intergenic | -5122   | NM_00108 | 74206  | Sipa1l3  | 2610511M   |
| chr3  | 1.33E+08 | 1.33E+08 | Intergenic | MTD LTR I  | -20611  | NM_00129 | 74776  | Ppa2     | 1110013G1  |
| chr7  | 26404527 | 26404675 | promoter-1 | promoter-1 | 89      | NM_02550 | 66349  | Atp5sl   | 2310004LO  |
| chr4  | 1.36E+08 | 1.36E+08 | intron (NM | CpG        | 238     | NM_01373 | 27224  | Tceb3    | 110kDa A   |
| chr6  | 52915327 | 52915625 | intron (NM | intron (NM | -55862  | NM_00116 | 231986 | Jazf1    | AI591476 I |
| chr1  | 1.35E+08 | 1.35E+08 | 5' UTR (NM | 5' UTR (NM | 408     | NM_13381 | 108954 | Ppp1r15b | 1810033K1  |
| chr1  | 1.67E+08 | 1.67E+08 | promoter-1 | promoter-1 | -351    | NM_17302 | 271639 | Adcy10   | 4930431DC  |
| chrX  | 34624127 | 34624200 | intron (NM | intron (NM | 1016    | NM_02605 | 67248  | Rpl39    | 2810465O1  |
| chr1  | 93355552 | 93355625 | intron (NM | CpG        | 317     | NM_01106 | 18627  | Per2     | mKIAA034;  |
| chr4  | 61743827 | 61744125 | TTS (NM_0  | TTS (NM_0  | 4370    | NM_00103 | 17842  | Mup3     | MUP15 MI   |
| chr1  | 1.53E+08 | 1.53E+08 | promoter-1 | promoter-1 | 623     | NM_02687 | 98685  | Trmt1l   | 1190005F2  |
| chr17 | 37095527 | 37095775 | promoter-1 | promoter-1 | 114     | NM_02960 | 76416  | Znrd1as  | 1700022C2  |
| chr13 | 93125052 | 93125375 | promoter-1 | promoter-1 | -255    | NM_01082 | 17686  | Msh3     | D13Em1 R   |
| chr10 | 77517327 | 77517650 | promoter-1 | promoter-1 | -592    | NM_00128 | 54427  | Dnmt3l   | D6ErtD14e  |
| chr7  | 78772452 | 78772550 | Intergenic | ORR1E LTF  | 678980  | NM_00102 | 244049 | Mctp2    | Gm489      |
| chr11 | 50060552 | 50060625 | Intergenic | B2_Mm2 S   | -8615   | NM_00852 | 17001  | Ltc4s    | -          |
| chr14 | 98509177 | 98509500 | intron (NM | intron (NM | 59646   | NM_00103 | 13134  | Dach1    | Dac Dach   |
| chr2  | 1.03E+08 | 1.03E+08 | intron (NM | L2b LINE L | 12734   | NM_17889 | 99382  | Abtb2    | AW539457   |
| chr7  | 89592827 | 89593125 | intron (NM | intron (NM | 108772  | NM_00119 | 269959 | Adamtsl3 | 9230119C1  |
| chr12 | 25443177 | 25443400 | Intergenic | Intergenic | 50169   | NM_00910 | 20135  | Rrm2     | AA407299   |
| chr9  | 77563802 | 77563900 | Intergenic | Intergenic | -38491  | NM_01029 | 14629  | Gclc     | D9Wsu168   |
| chr11 | 97274077 | 97274200 | Intergenic | Intergenic | -37336  | NM_02149 | 58996  | Arhgap23 | A330041B1  |
| chr1  | 55293902 | 55294250 | promoter-1 | promoter-1 | 55      | NM_17543 | 212679 | Mars2    | C730026E2  |
| chr11 | 54599102 | 54599200 | intron (NM | (TC)n Sim  | 2054    | NM_17862 | 72729  | Cdc42se2 | 2810404F1  |
| chr4  | 1.29E+08 | 1.29E+08 | intron (NM | CpG        | 156     | NM_19930 | 230770 | Tmem39b  | 6330509E0  |
| chr11 | 55283202 | 55283475 | promoter-1 | promoter-1 | 84      | NM_01371 | 27041  | G3bp1    | AI849976 I |
| chr8  | 1.29E+08 | 1.29E+08 | Intergenic | MTD LTR I  | -127490 | NM_00116 | 270110 | Irf2bp2  | E130305N2  |
| chr11 | 79691752 | 79691825 | Intergenic | Intergenic | 84101   | NM_14482 | 216987 | Utp6     | 4732497OC  |
| chr2  | 49276002 | 49276175 | Intergenic | Intergenic | -30918  | NM_17266 | 227867 | Epc2     | 5830499L1  |
| chr15 | 59381827 | 59382025 | intron (NM | intron (NM | -98283  | NM_14454 | 211770 | Trib1    | A530090O:  |
| chr1  | 1.74E+08 | 1.74E+08 | exon (NM_  | exon (NM_  | 239     | NM_02623 | 67556  | Pigm     | 4933437LO  |
| chr6  | 1.16E+08 | 1.16E+08 | intron (NM | CpG        | 254     | NM_17741 | 330401 | Tmcc1    | 3632431M   |
| chr9  | 72839327 | 72839525 | intron (NM | intron (NM | 6115    | NM_02818 | 72278  | Ccp1     | 1700030BC  |
| chr6  | 28210777 | 28210875 | 5' UTR (NM | 5' UTR (NM | 775     | NM_00108 | 627049 | Zfp800   | AA407452   |

|       |          |          |             |             |         |          |        |          |             |
|-------|----------|----------|-------------|-------------|---------|----------|--------|----------|-------------|
| chr10 | 86208177 | 86208400 | intron (NM  | intron (NM  | 32778   | NM_15359 | 103220 | BC030307 | AI449705    |
| chr2  | 91022727 | 91022900 | intron (NM  | CpG         | 391     | NM_00117 | 228355 | Madd     | 9630059K2   |
| chr9  | 66148627 | 66148750 | Intergenic  | ORR1E LTF   | -49569  | NM_14561 | 235439 | Herc1    | 2810449H1   |
| chr18 | 57614602 | 57614700 | Intergenic  | Intergenic  | -13489  | NM_00113 | 629147 | Ctxn3    | ENSMUSGC    |
| chr8  | 87595777 | 87595900 | exon (NM_   | exon (NM_   | 182     | NM_00103 | 330817 | Dhps     | Dhs         |
| chr8  | 1.27E+08 | 1.27E+08 | intron (NM  | intron (NM  | 24928   | NM_05320 | 112405 | Egln1    | AI503754 I  |
| chr12 | 88291527 | 88291750 | intron (NM  | intron (NM  | 3345    | NM_00128 | 217732 | Cipc     | 2310044G1   |
| chr6  | 88028827 | 88028900 | Intergenic  | B3 SINE B.  | -5604   | NM_13393 | 103963 | Rpn1     | AU018702    |
| chr18 | 61918527 | 61918650 | intron (NM  | intron (NM  | 27728   | NM_17892 | 106877 | Afap1l1  | AI173486    |
| chr14 | 63741727 | 63741975 | intron (NM  | intron (NM  | 552     | NM_00779 | 13030  | Ctsb     | CB          |
| chr6  | 52167527 | 52167725 | 5' UTR (NM  | 5' UTR (NM  | 946     | NM_01045 | 15404  | Hoxa7    | AV118143    |
| chr7  | 1.34E+08 | 1.34E+08 | Intergenic  | Intergenic  | -11839  | NM_14563 | 246779 | Il27     | IL-27 IL-27 |
| chr1  | 59538152 | 59538350 | promoter-1  | promoter-1  | -740    | NM_00805 | 14369  | Fzd7     | Fz7         |
| chr19 | 34242477 | 34242700 | Intergenic  | Intergenic  | -2057   | NM_02420 | 52024  | Ankrd22  | 5430429D2   |
| chr5  | 1.38E+08 | 1.38E+08 | intron (NM  | intron (NM  | 579     | NM_02391 | 78829  | Tsc22d4  | 0610009M    |
| chr8  | 10277377 | 10277450 | intron (NM  | intron (NM  | 123490  | NM_00108 | 244281 | Myo16    | C230040D1   |
| chr1  | 1.53E+08 | 1.53E+08 | intron (NM  | CpG         | 260     | NM_00103 | 117198 | Ivns1abp | 1190004M    |
| chr16 | 36367627 | 36367950 | promoter-1  | promoter-1  | -132    | NM_00108 | 1E+08  | BC100530 | -           |
| chr11 | 95316727 | 95316850 | intron (NM  | intron (NM  | 41391   | NM_02528 | 20747  | Spop     | AI315626 I  |
| chr5  | 1.14E+08 | 1.14E+08 | intron (NM  | intron (NM  | 580     | NM_02552 | 66383  | Iscu     | 2310020H2   |
| chr8  | 82787477 | 82787600 | Intergenic  | Intergenic  | -205631 | NM_02025 | 15245  | Hhip     | Hhip1       |
| chr7  | 20278702 | 20279250 | promoter-1  | promoter-1  | -968    | NM_00746 | 11812  | Apoc1    | Apo-CIB A   |
| chr15 | 41622302 | 41622475 | intron (NM  | MIR3 SINE   | 1327    | NM_13088 | 170719 | Oxr1     | 2210416C2   |
| chr11 | 98902777 | 98902950 | exon (NM_   | exon (NM_   | 289     | NM_01051 | 16010  | Igfbp4   | AI875747 I  |
| chr13 | 41763727 | 41763900 | Intergenic  | Intergenic  | 17682   | NM_00114 | 328231 | Gm5082   | A030008JO   |
| chr12 | 84973727 | 84974025 | intron (NM  | CpG         | 692     | NM_02734 | 67039  | Rbm25    | 2600011CC   |
| chr7  | 25662952 | 25663100 | TTS (NM_0   | TTS (NM_0   | -6707   | NM_02313 | 20085  | Rps19    | Dsk3        |
| chr3  | 19935077 | 19935225 | exon (NM_   | exon (NM_   | 159     | NM_00114 | 12807  | Hps3     | coa         |
| chr7  | 1.34E+08 | 1.34E+08 | intron (NR_ | intron (NR_ | 3285    | NM_02371 | 73658  | Spns1    | 2210013KC   |
| chr2  | 1.68E+08 | 1.68E+08 | Intergenic  | Intergenic  | -6426   | NM_01120 | 19246  | Ptpn1    | PTP-1B PTI  |
| chr4  | 1.29E+08 | 1.29E+08 | intron (NM  | intron (NM  | 444     | NM_19930 | 230770 | Tmem39b  | 6330509E0   |
| chr8  | 73421652 | 73421750 | promoter-1  | promoter-1  | -359    | NM_02975 | 76808  | Rpl18a   | 2510019JO   |
| chr8  | 68866852 | 68867175 | intron (NM  | intron (NM  | -43187  | NM_00116 | 72925  | 1-Mar    | 2900024D2   |
| chr1  | 1.37E+08 | 1.37E+08 | promoter-1  | promoter-1  | 399     | NM_17708 | 320139 | Ptpn7    | BPTP-4 C9   |
| chr7  | 87485302 | 87485500 | promoter-1  | promoter-1  | -296    | NM_13395 | 101869 | Unc45a   | AW538196    |
| chr13 | 37695252 | 37695450 | Intergenic  | Intergenic  | -222556 | NM_02683 | 68750  | Rreb1    | 1110037NC   |
| chr3  | 67361127 | 67361225 | Intergenic  | Intergenic  | -25514  | NM_02581 | 66868  | Mfsd1    | 1200003OC   |
| chr2  | 90405602 | 90405700 | intron (NM  | intron (NM  | 15153   | NM_00898 | 19271  | Ptprj    | AI450271 I  |
| chr19 | 40758652 | 40758825 | intron (NM  | intron (NM  | 24454   | NM_00984 | 12495  | Entpd1   | 2610206BC   |
| chr2  | 1.33E+08 | 1.33E+08 | promoter-1  | promoter-1  | 224     | NM_00129 | 66634  | Mcm8     | 5730432LO   |
| chr5  | 28117477 | 28117850 | intron (NM  | CpG         | 427     | NM_01887 | 55982  | Paxip1   | D5Erttd149  |
| chr7  | 25235452 | 25235775 | Intergenic  | Intergenic  | -4912   | NM_19901 | 210145 | Irgc1    | F630044MI   |
| chr1  | 1.93E+08 | 1.93E+08 | promoter-1  | promoter-1  | -40     | NM_02689 | 68972  | Tatdn3   | 1500010M    |
| chr8  | 81344652 | 81344975 | intron (NM  | CpG         | 238     | NM_00119 | 78651  | Lsm6     | 1500031N1   |
| chr4  | 1.26E+08 | 1.26E+08 | Intergenic  | Intergenic  | -3449   | NM_15317 | 76850  | Ago4     | 5730550LO   |
| chr2  | 48666452 | 48666600 | Intergenic  | Lx8 LINE L  | -3103   | NM_00739 | 11480  | Acvr2a   | Actr1la Acv |
| chr1  | 75165027 | 75165175 | promoter-1  | promoter-1  | -119    | NM_00115 | 68818  | Zfand2b  | 1110060O1   |

|       |          |          |            |            |         |          |        |           |            |
|-------|----------|----------|------------|------------|---------|----------|--------|-----------|------------|
| chr15 | 37931352 | 37931525 | intron (NM | RLTR16 LT  | -40628  | NM_19947 | 382985 | Rrm2b     | p53R2      |
| chr3  | 1.44E+08 | 1.44E+08 | exon (NM_  | exon (NM_  | 311     | NM_00128 | 54673  | Sh3glb1   | AA409932   |
| chr10 | 13280252 | 13280350 | intron (NM | intron (NM | -7353   | NM_00116 | 56535  | Pex3      | 1700014F1  |
| chr9  | 22750202 | 22750300 | Intergenic | Intergenic | -277269 | NM_02847 | 73230  | Bmper     | 3110056HC  |
| chr7  | 26005127 | 26005350 | promoter-1 | promoter-1 | -360    | NM_20767 | 67379  | Dedd2     | 2410050E1  |
| chr3  | 1.52E+08 | 1.52E+08 | promoter-1 | promoter-1 | -113    | NM_17801 | 329777 | Pigk      | 3000001OC  |
| chr15 | 98522477 | 98522650 | Intergenic | MIRc SINE  | -14671  | NM_17261 | 223881 | Rnd1      | A830014L0  |
| chr19 | 31157127 | 31157400 | promoter-1 | promoter-1 | -68     | NM_03124 | 83410  | Cstf2t    | 64kDa C77  |
| chr5  | 1.4E+08  | 1.4E+08  | intron (NM | intron (NM | 11037   | NM_02846 | 73212  | 3110082I1 | AW411904   |
| chr11 | 76998452 | 76998550 | intron (NM | MER58B D   | 3969    | NM_17696 | 319634 | Efcab5    | 4930563AC  |
| chr15 | 75692602 | 75692725 | promoter-1 | promoter-1 | -106    | NM_02696 | 69146  | Gsdmd     | 1810036L0  |
| chr1  | 1.83E+08 | 1.83E+08 | Intergenic | B1_Mur2 S  | -6662   | NM_17709 | 320202 | Lefty2    | 6030463A2  |
| chr1  | 1.57E+08 | 1.57E+08 | intron (NM | CpG        | 448     | NM_01127 | 19775  | Xpr1      | Rmc-1 Rm   |
| chr19 | 23833127 | 23833275 | promoter-1 | promoter-1 | -165    | NM_17703 | 319924 | Apba1     | 6430513E0  |
| chr16 | 44725802 | 44725900 | intron (NM | MIR SINE   | 1437    | NM_14597 | 212547 | BC027231  | Nepro      |
| chr3  | 88963502 | 88963775 | intron (NM | intron (NM | 441     | NM_00822 | 15168  | Hcn3      | BCNG-4 Bc  |
| chr6  | 1.01E+08 | 1.01E+08 | intron (NM | ORR1D1 L'  | 54788   | NM_18159 | 72171  | Shq1      | 2810403P1  |
| chr9  | 26250677 | 26250900 | Intergenic | Lx5 LINE L | -308359 | NM_02979 | 76898  | B3gat1    | 0710007KC  |
| chr7  | 82801127 | 82801350 | intron (NM | intron (NM | -191986 | NM_00112 | 207952 | Klhl25    | 2810402K1  |
| chr8  | 83538302 | 83538375 | 5' UTR (NV | 5' UTR (NV | 467     | NM_02755 | 74841  | Usp38     | 4631402N1  |
| chr4  | 1.34E+08 | 1.34E+08 | intron (NM | intron (NM | 5056    | NM_14555 | 100017 | Ldlrap1   | AA691260   |
| chr6  | 18204577 | 18204775 | intron (NM | intron (NM | 83989   | NM_02105 | 12638  | Cftr      | AW495489   |
| chr5  | 1.44E+08 | 1.44E+08 | promoter-1 | promoter-1 | -410    | NM_00739 | 11461  | Actb      | Actx E430C |
| chr11 | 16899302 | 16899400 | intron (NM | L1MA4 LIN  | 9370    | NM_01954 | 56193  | Plek      | 2010300B1  |
| chr14 | 31430002 | 31430225 | intron (NM | intron (NM | 9281    | NM_01110 | 18753  | Prkcd     | AI385711 I |
| chr4  | 8748752  | 8748875  | intron (NM | intron (NM | 131260  | NM_00127 | 320790 | Chd7      | A730019I0  |
| chr8  | 87503627 | 87503850 | Intergenic | Intergenic | -1091   | NM_00841 | 16477  | Junb      | -          |
| chr16 | 36041652 | 36041825 | exon (NM_  | exon (NM_  | 462     | NM_02711 | 69544  | Wdr5b     | 2310009CC  |
| chr12 | 84973052 | 84973375 | promoter-1 | promoter-1 | 29      | NM_02734 | 67039  | Rbm25     | 2600011CC  |
| chr8  | 13339052 | 13339150 | intron (NM | CpG        | 297     | NM_00936 | 21781  | Tfdp1     | Dp1 Drtf1  |
| chr13 | 1.01E+08 | 1.01E+08 | intron (NM | intron (NM | 577     | NM_00116 | 76041  | Ccdc125   | 5830436DC  |
| chr11 | 21123077 | 21123250 | Intergenic | Intergenic | -15872  | NM_13906 | 245944 | Vps54     | Hcc8 Vps5  |
| chr18 | 10052477 | 10052700 | Intergenic | Intergenic | -22441  | NM_00103 | 59025  | Usp14     | 2610005K1  |
| chr6  | 72849377 | 72849525 | intron (NM | CpG        | 522     | NM_01971 | 74287  | Kcmf1     | 1700094M   |
| chr8  | 23816802 | 23816900 | intron (NM | CpG        | 204     | NM_01054 | 16150  | Ikbbk     | AI132552 I |
| chr1  | 59045252 | 59045400 | intron (NM | intron (NM | 14911   | NM_17265 | 227154 | Stradb    | AA792893   |
| chr8  | 72736477 | 72736575 | promoter-1 | promoter-1 | -346    | NM_00100 | 73095  | Slc25a42  | 2900084M   |
| chr17 | 24551002 | 24552950 | promoter-1 | promoter-1 | 356     | NM_00108 | 19826  | Rnps1     | -          |
| chr7  | 1.06E+08 | 1.06E+08 | Intergenic | Intergenic | -24825  | NM_00113 | 14918  | Gucy2d    | -          |
| chr8  | 26895602 | 26895900 | promoter-1 | promoter-1 | -70     | NM_02612 | 67384  | Bag4      | 24101121I! |
| chr2  | 25995227 | 25995800 | promoter-1 | promoter-1 | -450    | NM_00125 | 109299 | C330006A1 | AI551216   |
| chr7  | 20525327 | 20525500 | intron (NM | intron (NM | 10679   | NM_02730 | 70080  | Igsf23    | 2210010C1  |
| chr18 | 76401052 | 76401125 | promoter-1 | promoter-1 | -267    | NM_01075 | 17126  | Smad2     | 7120426M   |
| chr11 | 83253077 | 83253450 | intron (NM | B1F2 SINE  | 2067    | NM_02549 | 66330  | 1700020L2 | -          |
| chr9  | 1.19E+08 | 1.19E+08 | intron (NM | intron (NM | 20567   | NM_17711 | 320256 | Dlec1     | D630005CC  |
| chr8  | 73046727 | 73046900 | intron (NM | CpG        | 266     | NM_02936 | 75620  | Kxd1      | 0610030BC  |
| chr5  | 1.16E+08 | 1.16E+08 | promoter-1 | promoter-1 | -264    | NM_01968 | 56455  | Dynll1    | Dlc8 Dncl  |

|       |          |          |            |            |         |          |        |           |             |
|-------|----------|----------|------------|------------|---------|----------|--------|-----------|-------------|
| chr3  | 83788902 | 83789100 | intron (NM | intron (NM | 55082   | NM_17268 | 229473 | D930015EC | Kiaa0922 r  |
| chr2  | 1.29E+08 | 1.29E+08 | Intergenic | MIRb SINE  | -4105   | NM_01055 | 16175  | Il1a      | Il-1a       |
| chr6  | 1.18E+08 | 1.18E+08 | intron (NM | CpG        | 216     | NM_17768 | 232337 | Zfp637    | AI646709 I  |
| chr17 | 35183302 | 35183425 | 5' UTR (NM | 5' UTR (NM | 188     | NM_01360 | 17687  | Msh5      | G7 Mut5     |
| chr4  | 94717102 | 94717675 | exon (NM_  | exon (NM_  | 1525    | NM_01059 | 16476  | Jun       | AP-1 Junc   |
| chr19 | 47061752 | 47061975 | intron (NM | intron (NM | -17806  | NM_00116 | 76952  | Nt5c2     | 201000212:  |
| chr12 | 85292002 | 85292150 | exon (NM_  | exon (NM_  | 518     | NM_02363 | 71952  | 24100160C | MAPJD NC    |
| chr9  | 79607452 | 79607650 | 5' UTR (NM | 5' UTR (NM | 109     | NM_00994 | 12866  | Cox7a2    | COX7AL Cc   |
| chr17 | 15842052 | 15842350 | 5' UTR (NM | 5' UTR (NM | 270     | NM_00769 | 12648  | Chd1      | 4930525N2   |
| chr2  | 1.64E+08 | 1.64E+08 | Intergenic | Intergenic | -18793  | NM_00903 | 19668  | Rbpjl     | RBP-L Rbp   |
| chr2  | 1.29E+08 | 1.29E+08 | Intergenic | Intergenic | -11513  | NM_02824 | 72477  | Tmem87b   | 2610301K1   |
| chr19 | 55332252 | 55332500 | intron (NM | intron (NM | 4517    | NM_02797 | 433256 | AcsI5     | 1700030F0   |
| chr10 | 98590527 | 98590700 | intron (NM | L2 LINE L2 | 19844   | NM_01573 | 14426  | Galnt4    | AV011803    |
| chr7  | 88358627 | 88359075 | exon (NM_  | exon (NM_  | 161     | NM_00880 | 18584  | Pde8a     | AI551852 I  |
| chr10 | 98704702 | 98704775 | Intergenic | Intergenic | -21127  | NM_02626 | 67603  | Dusp6     | 130001910:  |
| chr2  | 60741627 | 60741725 | intron (NM | intron (NM | -22181  | NM_00114 | 56878  | Rbms1     | 2600014B1   |
| chr17 | 28152502 | 28152650 | intron (NM | intron (NM | 64953   | NM_01368 | 21463  | Tcp11     | D17Ken1 T   |
| chr11 | 65601627 | 65601725 | exon (NM_  | exon (NM_  | 123     | NM_00915 | 26398  | Map2k4    | JNKK1 MEI   |
| chr5  | 91046977 | 91047125 | intron (NM | intron (NM | 22462   | NM_02847 | 73246  | Rassf6    | 1600016B1   |
| chr5  | 66534902 | 66535250 | intron (NM | intron (NM | 7141    | NM_00129 | 245945 | Rbm47     | 9530077J1:  |
| chr5  | 89107902 | 89108175 | Intergenic | Intergenic | -2842   | NM_17870 | 231413 | Grsf1     | BB232551    |
| chr1  | 1.87E+08 | 1.87E+08 | Intergenic | Intergenic | -50435  | NM_14551 | 226778 | Mark1     | AW491150    |
| chr11 | 1.18E+08 | 1.18E+08 | intron (NM | CpG        | 180     | NM_13375 | 74451  | Pgs1      | 2610019F1   |
| chr4  | 1.4E+08  | 1.4E+08  | Intergenic | Intergenic | -1650   | NM_17386 | 108911 | Rcc2      | 2610510HC   |
| chr5  | 1.3E+08  | 1.3E+08  | intron (NM | L1M2 LINE  | 4910    | NM_02882 | 74222  | 14-Sep    | 1700016K1   |
| chr8  | 86117852 | 86118025 | intron (NM | intron (NM | 452     | NM_02717 | 106529 | Tecr      | 2410016D2   |
| chr4  | 1.03E+08 | 1.03E+08 | promoter-1 | promoter-1 | -149    | NM_17773 | 242585 | Slc35d1   | AI834976 C  |
| chr1  | 1.52E+08 | 1.52E+08 | Intergenic | Intergenic | -4637   | NM_00886 | 18783  | Pla2g4a   | Pla2g4 cPL  |
| chr1  | 9897127  | 9897525  | Intergenic | Intergenic | -1393   | NM_17772 | 240697 | Mcmcdc2   | 6030422M    |
| chr5  | 1.25E+08 | 1.25E+08 | intron (NM | intron (NM | 23962   | NM_02953 | 76167  | Snrnp35   | 6330548G2   |
| chr2  | 11446477 | 11446550 | intron (NM | Lx8 LINE L | -22796  | NM_00117 | 170768 | Pfkfb3    | E330010H2   |
| chr1  | 1.31E+08 | 1.31E+08 | Intergenic | Intergenic | -120662 | NM_00991 | 12767  | Cxcr4     | CD184 Cm    |
| chr15 | 76648052 | 76648350 | intron (NM | CpG        | 399     | NM_00116 | 223666 | Arhgap39  | 9530053N2   |
| chr1  | 89904752 | 89904900 | intron (NM | CpG        | 300     | NM_00119 | 227334 | Usp40     | B230215L0   |
| chr9  | 21397227 | 21397425 | promoter-1 | promoter-1 | -51     | NM_00120 | 74766  | Yipf2     | 1300010KC   |
| chr8  | 34296727 | 34296925 | Intergenic | Intergenic | 199173  | NM_00112 | 22427  | Wrn       | AI846146    |
| chr12 | 93087302 | 93087500 | exon (NM_  | exon (NM_  | 196     | NM_00103 | 20338  | Sel1l     | AW493766    |
| chr5  | 96606177 | 96606350 | Intergenic | Intergenic | -15254  | NM_14491 | 231464 | Cnot6l    | 4932442K2   |
| chr4  | 1.48E+08 | 1.48E+08 | intron (NM | CpG        | 145     | NM_01978 | 56273  | Pex14     | Pex14p R7   |
| chr5  | 1.24E+08 | 1.24E+08 | Intergenic | Intergenic | -4239   | NM_00104 | 208043 | Setd1b    | AA516740    |
| chr17 | 45082227 | 45082300 | intron (NM | intron (NM | -64429  | NM_02925 | 75341  | 4930564CC | -           |
| chr2  | 1.52E+08 | 1.52E+08 | promoter-1 | promoter-1 | -42     | NM_17509 | 228775 | Trib3     | lflid2 Nipk |
| chr11 | 3075902  | 3076075  | intron (NM | intron (NM | 17478   | NM_03020 | 78887  | Sfi1      | -           |
| chr6  | 6446352  | 6447125  | Intergenic | Intergenic | 81920   | NM_00916 | 20422  | Shfm1     | DSS1 Shfd   |
| chr11 | 83477152 | 83477300 | intron (NM | intron (NM | 1140    | NM_01365 | 20303  | Ccl4      | AT744.1 A   |
| chr2  | 69554602 | 69554825 | Intergenic | RMER15 L   | -4050   | NM_17724 | 320720 | Fastkd1   | 5330408NC   |
| chr2  | 1.03E+08 | 1.03E+08 | Intergenic | Intergenic | -42279  | NM_00103 | 12505  | Cd44      | AU023126    |

|       |          |          |             |             |         |          |        |           |             |
|-------|----------|----------|-------------|-------------|---------|----------|--------|-----------|-------------|
| chr1  | 1.66E+08 | 1.66E+08 | intron (NM  | intron (NM  | 1498    | NM_00972 | 11931  | Atp1b1    | Atp4b Atp   |
| chr5  | 1.44E+08 | 1.44E+08 | intron (NM  | CpG         | 476     | NM_17272 | 231868 | E130309D  | C6A30028N   |
| chr9  | 20682877 | 20683775 | intron (NM  | intron (NM  | 828     | NM_14515 | 70726  | Angptl6   | 6330404E1   |
| chr5  | 73684027 | 73684325 | 5' UTR (NM  | 5' UTR (NM  | 143     | NM_00115 | 68095  | Ociad1    | 6030432N    |
| chr8  | 80263977 | 80264200 | Intergenic  | LTR16B2 L   | -15737  | NM_01033 | 13617  | Ednra     | ET-AR ETa   |
| chr2  | 1.19E+08 | 1.19E+08 | Intergenic  | Intergenic  | 5835    | NM_02692 | 69065  | Chac1     | 1810008K    |
| chr2  | 92447377 | 92447700 | intron (NM  | intron (NM  | 7674    | NM_02385 | 76969  | Chst1     | 2610008E2   |
| chr6  | 72494327 | 72494725 | promoter-1  | promoter-1  | -5      | NM_00127 | 12332  | Capg      | gCap39 ml   |
| chr8  | 1.25E+08 | 1.25E+08 | intron (NM  | intron (NM  | 2952    | NM_00130 | 13057  | Cyba      | b558 nmf3   |
| chr10 | 79317302 | 79317500 | non-coding  | non-coding  | 224     | NM_00128 | 19205  | Ptbp1     | AA407203    |
| chr1  | 1.46E+08 | 1.46E+08 | intron (NM  | intron (NM  | 776     | NM_14599 | 214498 | Cdc73     | 8430414L1   |
| chr10 | 62710277 | 62710600 | intron (NM  | intron (NM  | 3893    | NM_02610 | 67345  | Herc4     | 1700056O1   |
| chr5  | 1.18E+08 | 1.18E+08 | intron (NM  | CpG         | 212     | NM_02153 | 59043  | Wsb2      | AA673511    |
| chr16 | 33937027 | 33937125 | intron (NM  | intron (NM  | 30013   | NM_00947 | 22247  | Umps      | 1700095D2   |
| chr13 | 13618252 | 13618400 | Intergenic  | Intergenic  | -64350  | NM_01074 | 17101  | Lyst      | D13Sfk13    |
| chr11 | 59263752 | 59263825 | promoter-1  | promoter-1  | 241     | NM_00120 | 194952 | Jmjd4     | 6430559I2   |
| chr1  | 60290752 | 60290975 | intron (NM  | L1_Mus2 L   | 53420   | NM_17344 | 269198 | Nbeal1    | 2310076G1   |
| chr11 | 69734127 | 69734350 | promoter-1  | promoter-1  | -106    | NM_00116 | 276770 | Eif5a     | AA410058    |
| chr3  | 68480952 | 68481125 | Intergenic  | Intergenic  | -13528  | NM_00115 | 16159  | Il12a     | IL-12p35 Il |
| chr1  | 1.57E+08 | 1.57E+08 | Intergenic  | Charlie16a  | 33190   | NM_01050 | 15939  | Ier5      | -           |
| chr19 | 7200302  | 7200600  | intron (NM  | intron (NM  | -20232  | NM_20141 | 396184 | Flrt1     | AW742165    |
| chr18 | 7186677  | 7186900  | intron (NM  | intron (NM  | 111111  | NM_00108 | 74934  | Armc4     | 4930463I2   |
| chr6  | 38842152 | 38842275 | Intergenic  | MLT1J2 LT   | -16024  | NM_00129 | 15258  | Hipk2     | 1110014O2   |
| chr19 | 57172352 | 57172500 | intron (NM  | intron (NM  | 21088   | NM_00110 | 226251 | Ablim1    | 2210411C1   |
| chr18 | 35863052 | 35863200 | promoter-1  | promoter-1  | -328    | NM_02966 | 76594  | Dnajc18   | 2700075BC   |
| chr6  | 96627902 | 96628100 | Intergenic  | Intergenic  | 382404  | NM_17723 | 320701 | Fam19a4   | C130034I1   |
| chr1  | 58643702 | 58643825 | promoter-1  | promoter-1  | 320     | NM_02559 | 66495  | Ndufb3    | 2700033I1   |
| chr18 | 24171802 | 24171900 | 3' UTR (NM  | 3' UTR (NM  | 7421    | NM_02155 | 59057  | Zfp191    | 3526401F1   |
| chr15 | 68606902 | 68607050 | Intergenic  | MLT1F1 LT   | -151874 | NM_01015 | 13992  | Khdrbs3   | Etle SLM-2  |
| chr1  | 52874577 | 52874700 | promoter-1  | promoter-1  | -106    | NM_00838 | 16329  | Inpp1     | 2300002CC   |
| chr13 | 64523827 | 64523900 | Intergenic  | Intergenic  | -9998   | NM_05318 | 105278 | Cdk20     | 4932702GC   |
| chr4  | 1.09E+08 | 1.09E+08 | Intergenic  | Intergenic  | -58786  | NM_02629 | 67646  | 4930522H1 | 1700007J2   |
| chr4  | 1.43E+08 | 1.43E+08 | intron (NM  | intron (NM  | 27816   | NM_01032 | 14726  | Pdpn      | Gp38 OTS-   |
| chr19 | 5487927  | 5488125  | exon (NM_   | exon (NM_   | 310     | NM_02787 | 71711  | Mus81     | 1200008A1   |
| chr11 | 1.15E+08 | 1.15E+08 | intron (NM  | intron (NM  | -8580   | NM_00799 | 14149  | Fdxr      | -           |
| chr7  | 1.35E+08 | 1.35E+08 | intron (NM  | intron (NM  | 397     | NM_02699 | 69234  | Zfp688    | 2810407K    |
| chr8  | 1.23E+08 | 1.23E+08 | TTS (NM_1   | TTS (NM_1   | -19076  | NM_17885 | 272551 | Gins2     | 2210013I1   |
| chr17 | 44846802 | 44847225 | intron (NR_ | intron (NR_ | 26112   | NR_07342 | 12393  | Runx2     | AML3 Cbf    |
| chr8  | 25793677 | 25793825 | intron (NM  | intron (NM  | -8524   | NM_01008 | 13524  | Adam18    | Adam27 D    |
| chr6  | 87452677 | 87452775 | intron (NM  | intron (NM  | -6405   | NM_17547 | 232201 | Arhgap25  | A130039I2   |
| chr12 | 81744077 | 81744200 | intron (NM  | intron (NM  | 710     | NM_00795 | 13877  | Erh       | Mer Prei1   |
| chr4  | 1.3E+08  | 1.3E+08  | intron (NM  | intron (NM  | 2949    | NM_00116 | 19244  | Ptp4a2    | Prl-2       |
| chr10 | 58393452 | 58393750 | intron (NM  | (CAGAG)n    | 117494  | NM_17278 | 237353 | Sh3rf3    | 4831416G1   |
| chr1  | 1.89E+08 | 1.89E+08 | Intergenic  | Intergenic  | -36164  | NM_02604 | 67223  | Rrp15     | 2810430M    |
| chr6  | 53648552 | 53648725 | Intergenic  | Intergenic  | 122181  | NM_02581 | 66873  | Tril      | 1200009O2   |
| chr6  | 1.38E+08 | 1.38E+08 | intron (NM  | intron (NM  | 82503   | NM_17273 | 232449 | Dera      | 2010002D2   |
| chr15 | 72398977 | 72399200 | Intergenic  | Intergenic  | -22379  | NM_00103 | 223604 | Kcnk9     | Task3       |



|       |          |          |                |            |        |          |          |          |            |
|-------|----------|----------|----------------|------------|--------|----------|----------|----------|------------|
| chr12 | 4775752  | 4775975  | promoter-1     | promoter-1 | 210    | NM_17543 | 207921   | Fam228b  | A83009312  |
| chr11 | 75841277 | 75841475 | promoter-1     | promoter-1 | -92    | NM_02965 | 76566    | Fam101b  | 1500005K1  |
| chr2  | 34683427 | 34683525 | Intergenic     | Intergenic | -1721  | NM_00116 | 30050    | Fbxw2    | 2700071L0  |
| chr9  | 1.14E+08 | 1.14E+08 | intron (NR_CpG |            | 225    | NM_00120 | 1.01E+08 | Tmppe    | -          |
| chr7  | 1.4E+08  | 1.4E+08  | Intergenic     | Intergenic | -41888 | NM_02993 | 77590    | Chst15   | 4631426J0  |
| chr6  | 1.03E+08 | 1.03E+08 | intron (NM     | intron (NM | 23281  | NM_00769 | 12661    | Chl1     | A530023M   |
| chr3  | 1.05E+08 | 1.05E+08 | Intergenic     | L1MEe LIN  | -88572 | NM_00103 | 56543    | Kcnd3    | AW045978   |
| chr2  | 1.19E+08 | 1.19E+08 | Intergenic     | Intergenic | -18338 | NM_00104 | 228536   | Bahd1    | AL022997   |
| chr2  | 62568677 | 62568775 | intron (NM     | Lx3C LINE  | 66342  | NM_14552 | 227960   | Gca      | 5133401E0  |
| chr2  | 1.26E+08 | 1.26E+08 | intron (NM     | intron (NM | 13626  | NM_00108 | 241633   | Atp8b4   | A530043E1  |
| chr2  | 1.25E+08 | 1.25E+08 | intron (NM     | intron (NM | 845    | NM_00116 | 17876    | Myef2    | 9430071BC  |
| chr10 | 79712427 | 79712500 | intron (NM     | intron (NM | 266    | NM_02927 | 75406    | Ndufs7   | 1010001M   |
| chr1  | 1.61E+08 | 1.61E+08 | Intergenic     | Intergenic | -9806  | NM_01193 | 26374    | Rfwd2    | AI316802   |
| chr12 | 73862652 | 73862725 | intron (NM     | CpG        | 490    | NM_00891 | 19042    | Ppm1a    | 2310003C2  |
| chr7  | 1.48E+08 | 1.48E+08 | exon (NM_      | exon (NM_  | -2765  | NM_00125 | 54123    | Irf7     | -          |
| chr19 | 28992402 | 28992500 | Intergenic     | Intergenic | -45959 | NM_02892 | 74411    | Ppapdc2  | 4932443D1  |
| chr1  | 1.66E+08 | 1.66E+08 | intron (NM     | intron (NM | -16239 | NM_00797 | 14067    | F5       | AI173222   |
| chr14 | 52560827 | 52560925 | Intergenic     | Intergenic | -18428 | NM_00101 | 497071   | Rnase13  | -          |
| chr9  | 1.08E+08 | 1.08E+08 | promoter-1     | promoter-1 | -218   | NM_01163 | 22036    | Traip    | Trip       |
| chr2  | 1.81E+08 | 1.81E+08 | promoter-1     | promoter-1 | 21     | NM_00117 | 228998   | Arfgap1  | AI115377   |
| chr16 | 27319352 | 27319425 | intron (NM     | intron (NM | 11661  | NM_19811 | 239790   | Ostn     | Ostc       |
| chr11 | 74538002 | 74538350 | promoter-1     | promoter-1 | -290   | NM_01362 | 18472    | Pafah1b1 | LIS-1 Lis1 |
| chr8  | 74763952 | 74764100 | promoter-1     | promoter-1 | -5     | NM_00745 | 11767    | Ap1m1    | AA408894   |
| chr5  | 1E+08    | 1E+08    | promoter-1     | promoter-1 | -185   | NM_01669 | 50926    | Hnrnpdl  | AA407431   |
| chr6  | 1.25E+08 | 1.25E+08 | promoter-1     | promoter-1 | 70     | NM_00125 | 269800   | Zfp384   | BB163993   |
| chr7  | 29157452 | 29157525 | 5' UTR (NM     | 5' UTR (NM | 193    | NM_13875 | 101497   | Plekhg2  | AI194308   |
| chr9  | 22482977 | 22483275 | intron (NM     | intron (NM | 202967 | NM_17841 | 319845   | Bbs9     | E13010311  |
| chr5  | 1.3E+08  | 1.3E+08  | Intergenic     | Intergenic | -30712 | NM_00108 | 243277   | Gpr133   | E230012M   |
| chr5  | 1.38E+08 | 1.38E+08 | intron (NM     | intron (NM | 5568   | NM_15351 | 231805   | Pilra    | AV021745   |
| chr4  | 3802652  | 3802775  | Intergenic     | Intergenic | -3461  | NM_02002 | 17451    | Mos      | c-mos      |
| chr18 | 77820552 | 77820650 | Intergenic     | Tigger16b  | -16726 | NM_00116 | 225743   | Rnf165   | 2900024M   |
| chr2  | 1.67E+08 | 1.67E+08 | intron (NM     | intron (NM | 4073   | NM_01149 | 20853    | Stau1    | 5830401L1  |
| chr8  | 11208677 | 11208925 | intron (NM     | URR1A DN   | 104025 | NM_00993 | 12826    | Col4a1   | Bru Col4a- |
| chr17 | 34090427 | 34090700 | intron (NM     | intron (NM | 2023   | NM_01129 | 20084    | Rps18    | H-2Ke3 H2  |
| chr2  | 72307752 | 72307950 | Intergenic     | RMER15 L   | -6425  | NM_02586 | 66953    | Cdca7    | 2310021G0  |
| chr15 | 99532727 | 99532875 | promoter-1     | promoter-1 | 83     | NM_03184 | 83797    | Smarcd1  | AA407987   |
| chrX  | 84844452 | 84844700 | intron (NM     | intron (NM | 516386 | NM_00116 | 331461   | Il1rapl1 | 6330532G1  |
| chr5  | 1.3E+08  | 1.3E+08  | Intergenic     | Intergenic | -1278  | NM_02712 | 69568    | Vkorc111 | 2310024K0  |
| chr13 | 59344027 | 59344375 | Intergenic     | MTD LTR    | 301611 | NM_00128 | 67269    | Agtbp1   | 1700020N1  |
| chr7  | 3503352  | 3503700  | promoter-1     | promoter-1 | -93    | NM_17736 | 245126   | Tarm1    | 9930022N0  |
| chr10 | 94377052 | 94377150 | intron (NM     | intron (NM | 30111  | NM_01879 | 54712    | Plxnc1   | 2510048K1  |
| chr2  | 33769927 | 33770100 | Intergenic     | B4A SINE   | -26547 | NM_17518 | 72543    | Mvb12b   | 26102000   |
| chr15 | 74350102 | 74350225 | intron (NM     | CpG        | 3537   | NM_17499 | 107831   | Bai1     | B830018M   |
| chr1  | 1.74E+08 | 1.74E+08 | intron (NM     | intron (NM | 630    | NM_15355 | 98193    | Dcaf8    | AA408877   |
| chr12 | 3427352  | 3427425  | promoter-1     | promoter-1 | 531    | NM_17242 | 75302    | Asxl2    | 4930556B1  |
| chrX  | 71838652 | 71838725 | promoter-1     | promoter-1 | -979   | NM_14639 | 258393   | Olfr1325 | MOR102-1   |
| chr17 | 56273627 | 56273725 | promoter-1     | promoter-1 | -401   | NM_01366 | 20359    | Sema6b   | Sema Sem   |

|       |          |          |              |            |         |          |        |          |            |
|-------|----------|----------|--------------|------------|---------|----------|--------|----------|------------|
| chr15 | 64172277 | 64172650 | intron (NM   | intron (NM | -28228  | NM_00127 | 13196  | Asap1    | AV239055   |
| chr6  | 72898477 | 72898625 | Intergenic   | MLT2B3 L1  | 9675    | NM_00103 | 19240  | Tmsb10   | Ptmb10 Tk  |
| chr11 | 75162052 | 75162125 | promoter-1   | promoter-1 | 153     | NM_00110 | 319822 | Smyd4    | G430029E2  |
| chr5  | 16084227 | 16084500 | exon (NM_    | exon (NM_  | 24644   | NM_00128 | 15234  | Hgf      | C230052L0  |
| chr4  | 21655027 | 21655300 | intron (NM   | intron (NM | 315     | NM_00129 | 51813  | Ccnc     | AI451004 , |
| chr19 | 14671452 | 14671525 | intron (NM   | CpG        | 985     | NM_01160 | 21888  | Tle4     | 5730411M   |
| chr13 | 6633302  | 6633400  | intron (NM   | intron (NM | 14666   | NM_01970 | 56421  | Pfkp     | 1200015H2  |
| chr3  | 96433827 | 96434600 | promoter-1   | promoter-1 | 362     | NM_00110 | 60365  | Rbm8a    | 2310057CC  |
| chr19 | 30181952 | 30182225 | intron (NM   | intron (NM | 67843   | NM_13859 | 104174 | Gldc     | D030049L1  |
| chr11 | 59356777 | 59357200 | intron (NML1 | MB2 LIN    | 800     | NM_14582 | 216799 | Nlrp3    | AGTAVPRL   |
| chr16 | 17406177 | 17406250 | 5' UTR (NM   | 5' UTR (NM | 120     | NM_02334 | 67474  | Snap29   | 1300018GC  |
| chr12 | 90529752 | 90529950 | intron (NM   | intron (NM | 338017  | NM_17254 | 18191  | Nrxn3    | -          |
| chr11 | 1.06E+08 | 1.06E+08 | promoter-1   | promoter-1 | -295    | NM_17239 | 67803  | Limd2    | 0610025L0  |
| chr5  | 22989702 | 22989875 | intron (NMB3 | SINE B.    | 49541   | NM_02698 | 69188  | Kmt2e    | 1810033J1. |
| chrX  | 11584427 | 11584625 | Intergenic   | Intergenic | 73153   | NM_17504 | 71458  | Bcor     | 5830466J1  |
| chr10 | 92898202 | 92898475 | Intergenic   | Intergenic | -17803  | NM_00851 | 16993  | Lta4h    | -          |
| chr8  | 1.27E+08 | 1.27E+08 | promoter-1   | promoter-1 | 149     | NM_02685 | 68865  | Arv1     | 1110067L2  |
| chr3  | 89397102 | 89397175 | intron (NM   | intron (NM | 73052   | NM_08046 | 140493 | Kcnn3    | KCa2.3 SK: |
| chr4  | 1.36E+08 | 1.36E+08 | 5' UTR (NM   | 5' UTR (NM | 229     | NM_17773 | 242705 | E2f2     | 9230110J1  |
| chr4  | 1.23E+08 | 1.23E+08 | TTS (NM_0    | TTS (NM_0  | 22993   | NM_00891 | 19063  | Ppt1     | 9530043GC  |
| chr6  | 83117352 | 83117500 | intron (NM   | intron (NM | 1508    | NM_00119 | 13191  | Dctn1    | AL022633   |
| chr13 | 56027277 | 56027400 | Intergenic   | Intergenic | -94552  | NM_01109 | 18740  | Pitx1    | Bft P-OTX  |
| chr8  | 34785902 | 34786100 | intron (NMB3 | SINE B.    | 22291   | NM_01034 | 14782  | Gsr      | AI325518   |
| chr18 | 42421877 | 42422050 | promoter-1   | promoter-1 | -238    | NM_13413 | 107045 | Lars     | 2310045K2  |
| chr3  | 65695652 | 65695750 | Intergenic   | Intergenic | 66446   | NM_01993 | 56706  | Ccn1     | 2610030E2  |
| chr16 | 25535927 | 25536025 | Intergenic   | Intergenic | -147875 | NM_00112 | 22061  | Trp63    | AI462811   |
| chr3  | 1.16E+08 | 1.16E+08 | intron (NM   | intron (NM | 25362   | NM_00108 | 229776 | Cdc14a   | A830059A1  |
| chr6  | 94442477 | 94442725 | Intergenic   | Intergenic | -7707   | NM_02625 | 67582  | Slc25a26 | 4930433D1  |
| chr11 | 1.17E+08 | 1.17E+08 | 3' UTR (NM   | 3' UTR (NM | 67336   | NM_17294 | 268510 | Mgat5b   | C330018BC  |
| chr1  | 7696102  | 7696225  | Intergenic   | RLTR6_Mr   | 617162  | NM_18302 | 319263 | Pcmt1    | 8430411F1  |
| chr15 | 85163127 | 85163200 | Intergenic   | MTC LTR I  | -3648   | NM_01684 | 54138  | Atxn10   | AI325283 I |
| chr7  | 87927252 | 87927500 | intron (NM   | intron (NM | 20841   | NM_01672 | 29875  | Iqgap1   | AA682088   |
| chr8  | 63462377 | 63462825 | promoter-1   | promoter-1 | -493    | NM_17387 | 12725  | Cln3     | Cln3       |
| chr4  | 1.18E+08 | 1.18E+08 | intron (NM   | intron (NM | 10309   | NM_02678 | 68625  | Wdr65    | 1110020CC  |
| chr2  | 1.7E+08  | 1.7E+08  | intron (NM   | intron (NM | -3031   | NM_00103 | 228913 | Zfp217   | 4933431CC  |
| chr15 | 80332277 | 80332425 | intron (NM   | intron (NM | 58549   | NM_00116 | 383075 | Enthd1   | Gm1242 G   |
| chr15 | 66397327 | 66397550 | Intergenic   | Intergenic | -4830   | NM_17251 | 213068 | Tmem71   | AI661017   |
| chr13 | 63916277 | 63916375 | promoter-1   | promoter-1 | -302    | NM_00101 | 76251  | Ercc6l2  | 0610007PC  |
| chr5  | 1.14E+08 | 1.14E+08 | exon (NM_    | exon (NM_  | 195     | NM_01692 | 53890  | Sart3    | AU045857   |
| chr6  | 67216277 | 67218150 | exon (NM_    | exon (NM_  | 240     | NM_02581 | 66870  | Serbp1   | 1200009K1  |
| chr7  | 1.3E+08  | 1.3E+08  | intron (NM   | intron (NM | 170287  | NM_00885 | 18751  | Prkcb    | A130082FC  |
| chr4  | 1.51E+08 | 1.51E+08 | promoter-1   | promoter-1 | 127     | NM_02872 | 74035  | Nol9     | 4632412I2. |
| chr4  | 1.55E+08 | 1.55E+08 | Intergenic   | Intergenic | 5975    | NM_02198 | 21936  | Tnfrsf18 | AITR Gitr  |
| chr12 | 82990027 | 82990200 | intron (NML1 | MB2 LIN    | 29096   | NM_01881 | 54604  | Pcnx     | 2900024E2  |
| chr10 | 79352202 | 79352375 | Intergenic   | Intergenic | -1310   | NM_01345 | 11537  | Cfd      | Adn DF     |
| chr2  | 25118177 | 25118475 | exon (NM_    | exon (NM_  | 208     | NM_17528 | 97031  | Tprn     | C430004E1  |
| chr2  | 73749227 | 73749350 | promoter-1   | promoter-1 | 63      | NM_17501 | 228033 | Atp5g3   | 6030447M   |

|       |          |          |             |            |         |          |        |           |            |
|-------|----------|----------|-------------|------------|---------|----------|--------|-----------|------------|
| chr12 | 36219402 | 36219675 | 5' UTR (NM  | 5' UTR (NM | 123     | NM_01346 | 11622  | Ahr       | Ah Ahh Ah  |
| chr8  | 1.22E+08 | 1.22E+08 | intron (NM  | intron (NM | 8992    | NM_02692 | 69047  | Atp2c2    | 1810010GC  |
| chr3  | 66949352 | 66949525 | intron (NM  | intron (NM | 159844  | NM_02582 | 66880  | Rsrc1     | 1200013F2  |
| chr5  | 1.36E+08 | 1.36E+08 | intron (NML | L1MC4a LI  | 13579   | NM_00889 | 18984  | Por       | 4933424M   |
| chr9  | 50583152 | 50583375 | promoter-1  | promoter-1 | -67     | NM_13398 | 102580 | Alg9      | 8230402H1  |
| chr13 | 41535627 | 41535850 | intron (NM  | intron (NM | 46991   | NM_00111 | 18003  | Nedd9     | Cas-L CasL |
| chr2  | 51455077 | 51455225 | Intergenic  | Intergenic | -27880  | NM_19915 | 387511 | Tas2r134  | T2R134 Ta  |
| chr1  | 1.54E+08 | 1.54E+08 | intron (NM  | intron (NM | 31424   | NM_19799 | 69399  | 1700025GC | 2610510E0  |
| chr11 | 97660527 | 97660725 | promoter-1  | promoter-1 | -360    | NM_01068 | 16796  | Lasp1     | AA408629   |
| chr2  | 29627602 | 29628050 | Intergenic  | Intergenic | 10778   | NM_00117 | 433416 | Gm13547   | OTTMUSGC   |
| chr6  | 1.37E+08 | 1.37E+08 | TTS (NM_0   | TTS (NM_0  | -1137   | NM_02698 | 69187  | Erp27     | 1810033M   |
| chr5  | 69947927 | 69948050 | promoter-1  | promoter-1 | -193    | NM_17271 | 231279 | Guf1      | 4631409J1  |
| chr6  | 17359702 | 17360000 | Intergenic  | LTR81A LT  | -54106  | NM_00859 | 17295  | Met       | AI838057 I |
| chr18 | 77168502 | 77168675 | promoter-1  | promoter-1 | -178    | NM_02540 | 66191  | Ier3ip1   | 1110057H1  |
| chr3  | 1.05E+08 | 1.05E+08 | promoter-1  | promoter-1 | 614     | NM_15309 | 229681 | St7l      | St7r       |
| chr9  | 57102977 | 57103075 | intron (NM  | intron (NM | 7380    | NM_02882 | 74211  | 1700017BC | AA682102   |
| chr19 | 53614502 | 53614800 | intron (NM  | intron (NM | 10843   | NM_00108 | 240672 | Dusp5     | Gm337      |
| chr4  | 1.27E+08 | 1.27E+08 | Intergenic  | Intergenic | -149118 | NM_01029 | 14622  | Gjb5      | Cnx31.1 C  |
| chr14 | 79641027 | 79641200 | intron (NM  | intron (NM | 6061    | NM_00103 | 105590 | Zfp957    | AU017455   |
| chr7  | 19967352 | 19967500 | promoter-1  | promoter-1 | 38      | NM_00794 | 13871  | Ercc2     | AA407812   |
| chr16 | 90239427 | 90239725 | intron (NM  | intron (NM | 18589   | NM_01143 | 20655  | Sod1      | B430204E1  |
| chr11 | 52516877 | 52517150 | Intergenic  | Intergenic | -61195  | NM_17705 | 320027 | Fstl4     | B230374F2  |
| chr1  | 1.84E+08 | 1.84E+08 | promoter-1  | promoter-1 | 64      | NM_00785 | 13244  | Degs1     | AA536663   |
| chr1  | 1.34E+08 | 1.34E+08 | intron (NM  | intron (NM | 649     | NM_00119 | 74137  | Nuak2     | 1200013B2  |
| chr2  | 1.7E+08  | 1.7E+08  | Intergenic  | Intergenic | -70226  | NM_00115 | 228913 | Zfp217    | 4933431CC  |
| chr5  | 1.37E+08 | 1.37E+08 | intron (NM  | intron (NM | 450     | NM_17875 | 269717 | Orai2     | A730041O:  |
| chr15 | 52240377 | 52240675 | Intergenic  | Intergenic | 113418  | NM_17281 | 239436 | Slc30a8   | C820002P1  |
| chr15 | 55388902 | 55389200 | promoter-1  | promoter-1 | 88      | NM_00116 | 105837 | Mtbp      | AI429604 I |
| chr15 | 88582552 | 88582725 | intron (NM  | CpG        | 497     | NM_18141 | 223773 | Zbed4     | 1700009F0  |
| chr17 | 35378102 | 35379775 | promoter-1  | promoter-1 | 247     | NM_01969 | 53817  | Ddx39b    | 0610030D1  |
| chr6  | 99161777 | 99162000 | intron (NM  | intron (NM | 54621   | NM_00119 | 108655 | Foxp1     | 3110052D1  |
| chr7  | 1.35E+08 | 1.35E+08 | exon (NM_   | exon (NM_  | 309     | NM_17516 | 71131  | Zfp689    | 4933416E0  |
| chr14 | 15178702 | 15178975 | promoter-1  | promoter-1 | -171    | NM_00836 | 16188  | Il3ra     | CD123 CD\  |
| chr1  | 87629327 | 87629625 | intron (NM  | Lx8 LINE L | 3705    | NM_17705 | 319997 | A630001G: | -          |
| chr6  | 1.29E+08 | 1.29E+08 | Intergenic  | Intergenic | -16480  | NM_03059 | 80782  | Klrb1b    | Klrb1d Ly5 |
| chr3  | 27641227 | 27641300 | Intergenic  | Intergenic | -31902  | NM_17318 | 72007  | Fndc3b    | 1600019OC  |
| chr4  | 46150977 | 46151175 | promoter-1  | promoter-1 | 271     | NM_17303 | 272027 | Tstd2     | 3010020CC  |
| chr17 | 28819752 | 28820075 | intron (NML | L1MB4 LIN  | 7019    | NM_00129 | 224661 | Slc26a8   | -          |
| chr16 | 45158952 | 45159025 | promoter-1  | promoter-1 | 46      | NM_02640 | 67841  | Atg3      | 2610016C1  |
| chr2  | 32005827 | 32007725 | 5' UTR (NM  | 5' UTR (NM | 108     | NM_00115 | 227723 | Prrc2b    | 5830434P2  |
| chr5  | 74560677 | 74561075 | Intergenic  | Intergenic | -30475  | NM_02687 | 68939  | Rasl11b   | 1190017B1  |
| chr6  | 1.23E+08 | 1.23E+08 | promoter-1  | promoter-1 | -212    | NM_00116 | 17474  | Clec4d    | Clecsf8 M  |
| chrY  | 2789502  | 2789800  | Intergenic  | YREP_Mm    | 402393  | NM_00127 | 1E+08  | Gm3376    | Rbmy1b     |
| chr1  | 39559827 | 39559925 | Intergenic  | Intergenic | -24284  | NM_01877 | 54610  | Tbc1d8    | AD3 HBLP:  |
| chr9  | 36941052 | 36941450 | intron (NM  | intron (NM | 13656   | NM_14895 | 208076 | Pknx2     | D230005H:  |
| chr7  | 1.24E+08 | 1.24E+08 | promoter-1  | promoter-1 | -354    | NM_01108 | 18704  | Pik3c2a   | Cpk-m PI3  |
| chr8  | 74999327 | 74999400 | promoter-1  | promoter-1 | -231    | NM_13858 | 27967  | Cherp     | 57304081:  |

|       |          |          |            |            |         |           |        |          |            |
|-------|----------|----------|------------|------------|---------|-----------|--------|----------|------------|
| chr10 | 79158602 | 79158750 | TTS (NM_0  | TTS (NM_0  | 6911    | NM_00850  | 16904  | Gzmm     | Lmet1 MM   |
| chr16 | 18288927 | 18289150 | intron (NM | CpG        | 223     | NM_03332  | 94223  | Dgcr8    | D16H22S17  |
| chr1  | 75206052 | 75206225 | intron (NM | intron (NM | 1215    | NM_02901  | 74577  | Glb1l    | 4833408P1  |
| chr7  | 51559902 | 51560125 | exon (NM_  | exon (NM_  | 2316    | NM_00913  | 20256  | Clec11a  | AW457320   |
| chr11 | 74773127 | 74773300 | intron (NM | intron (NM | 33839   | NM_00100  | 103677 | Smg6     | AI317223   |
| chr2  | 1.49E+08 | 1.49E+08 | Intergenic | Intergenic | -70359  | NM_02140  | 58214  | Cst10    | DD72       |
| chr14 | 58505427 | 58505825 | intron (NM | intron (NM | 3473    | NM_02949  | 75965  | Zdhhc20  | 5033406L1  |
| chr5  | 1.26E+08 | 1.26E+08 | Intergenic | Intergenic | -16701  | NM_01963  | 22190  | Ubc      | 27000540C  |
| chr17 | 70860927 | 70861050 | intron (NM | intron (NM | -10462  | NM_00112  | 224997 | Dlgap1   | 49334220I  |
| chr13 | 52041352 | 52041750 | Intergenic | Intergenic | 99507   | NM_01181  | 23882  | Gadd45g  | AI327420 I |
| chrX  | 1.49E+08 | 1.49E+08 | 5' UTR (NM | 5' UTR (NM | 131     | NM_01366  | 20591  | Kdm5c    | D930009K1  |
| chr16 | 50449302 | 50449400 | Intergenic | B3A SINE   | -16849  | NM_02744  | 70508  | Bbx      | 5530401J0  |
| chr6  | 49281952 | 49282250 | intron (NM | RCHARR1 I  | 12749   | NM_17509  | 57895  | Ccdc126  | 6330407D1  |
| chr18 | 56207152 | 56207325 | Intergenic | Intergenic | -384548 | NM_02624  | 107022 | Gramd3   | 9030613F0  |
| chr11 | 68781327 | 68781400 | promoter-1 | promoter-1 | -270    | NM_02804  | 71998  | Slc25a35 | 1810012H1  |
| chr17 | 51028852 | 51029175 | intron (NM | intron (NM | 191007  | NM_00129  | 12228  | Btg3     | ANA tob5   |
| chr4  | 1.02E+08 | 1.02E+08 | Intergenic | Intergenic | 34703   | NM_00117  | 18578  | Pde4b    | Dpde4 R74  |
| chr2  | 25282252 | 25282475 | TTS (NM_0  | TTS (NM_0  | -1831   | NM_00737  | 11305  | Abca2    | AI413825 I |
| chr2  | 1.51E+08 | 1.51E+08 | promoter-1 | promoter-1 | -79     | NM_02701  | 69270  | Gins1    | 2810418NC  |
| chr5  | 1.35E+08 | 1.35E+08 | 5' UTR (NM | 5' UTR (NM | 354     | NM_00108  | 14886  | Gtf2i    | 6030441I2: |
| chr12 | 1.13E+08 | 1.13E+08 | exon (NM_  | exon (NM_  | 610     | NM_17737  | 328162 | Trmt61a  | 6720458F0  |
| chr13 | 73741727 | 73741800 | exon (NM_  | exon (NM_  | 313     | NM_14604  | 218335 | Clptm1l  | C130052I1: |
| chr9  | 15511002 | 15511425 | Intergenic | Intergenic | -3000   | NM_17228  | 234967 | Slc36a4  | 6330573I1! |
| chr10 | 57251877 | 57251950 | intron (NM | CpG        | 422     | NM_01976  | 56442  | Serinc1  | 1500011D1  |
| chr5  | 31504127 | 31504625 | promoter-1 | promoter-1 | 39      | NM_00117  | 101023 | Zfp513   | AW990386   |
| chr4  | 59202377 | 59202625 | promoter-1 | promoter-1 | 79      | NM_01167  | 22234  | Ugcg     | AU043821   |
| chr9  | 57870927 | 57871150 | intron (NM | intron (NM | 8214    | NM_01977  | 13070  | Cyp11a1  | Cyp11a Cy  |
| chr13 | 73605377 | 73605450 | intron (NM | intron (NM | 582     | NM_14537  | 210992 | Lpcat1   | 2900035HC  |
| chr6  | 90737227 | 90737775 | intron (NM | ID4 SINE I | 22616   | NM_00113  | 232227 | lqsec1   | AW561907   |
| chr1  | 1.81E+08 | 1.81E+08 | promoter-1 | promoter-1 | 160     | NM_00824  | 15278  | Tfb2m    | Hkp1       |
| chr10 | 81008252 | 81008325 | promoter-1 | promoter-1 | -497    | NM_01030  | 14672  | Gna11    | Dsk7 E430  |
| chr4  | 1.45E+08 | 1.45E+08 | Intergenic | Intergenic | -5168   | NM_00127  | 230895 | Vps13d   | -          |
| chr1  | 1.73E+08 | 1.73E+08 | Intergenic | L1MD3 LIN  | 45413   | NM_17706  | 320078 | Olfml2b  | 1110018NC  |
| chr11 | 59918802 | 59919025 | intron (NM | CpG        | 398     | NM_00902  | 19377  | Rai1     | Gt1        |
| chr1  | 60706377 | 60706575 | Intergenic | MIRc SINE  | -82867  | NM_00104  | 77300  | Raph1    | 9430025M   |
| chr9  | 1.01E+08 | 1.01E+08 | intron (NM | CpG        | 624     | NM_00116  | 235542 | Ppp2r3a  | 3222402P1  |
| chr4  | 1.27E+08 | 1.27E+08 | exon (NM_  | exon (NM_  | -7527   | NM_03025  | 80284  | Smim12   | BC003266   |
| chr7  | 36841552 | 36841675 | Intergenic | B3A SINE   | -253605 | NM_17773  | 668501 | Zfp507   | 18100220I  |
| chr4  | 1.26E+08 | 1.26E+08 | promoter-1 | promoter-1 | -40     | NR_04556: | 12986  | Csf3r    | Cd114 Csf3 |
| chr19 | 23761727 | 23761925 | promoter-1 | promoter-1 | -64     | NM_02820  | 72351  | Ptar1    | 1700084DC  |
| chr10 | 43988177 | 43988250 | promoter-1 | promoter-1 | 49      | NM_05306  | 11793  | Atg5     | 2010107M   |
| chr17 | 47891202 | 47891350 | intron (NM | intron (NM | 16396   | NM_00116  | 21425  | Tfeb     | Tcfef bHLI |
| chr17 | 32487302 | 32487425 | intron (NM | intron (NM | 159     | NM_01747  | 54194  | Akap8l   | HAP95 NaI  |
| chr14 | 70195277 | 70195425 | intron (NM | intron (NM | 10001   | NM_15351  | 246710 | Rhobtb2  | Dbc2 E130  |
| chr17 | 29396002 | 29396200 | intron (NM | intron (NM | 4815    | NM_02684  | 68816  | Ppil1    | 11100600I  |
| chr13 | 40124252 | 40124575 | intron (NM | intron (NM | 258967  | NM_17214  | 218165 | Ofcc1    | opo        |
| chr9  | 88243427 | 88243650 | intron (NM | intron (NM | 21091   | NM_01185  | 23959  | Nt5e     | 2210401F0  |

|       |          |          |             |             |         |          |        |           |            |
|-------|----------|----------|-------------|-------------|---------|----------|--------|-----------|------------|
| chr1  | 34516477 | 34516575 | promoter-1  | promoter-1  | -65     | NM_01120 | 19253  | Ptpn18    | FLP1 HSCF  |
| chr16 | 10977402 | 10977550 | intron (NM  | ID_B1 SINI  | 15738   | NM_01998 | 56722  | Litaf     | 3222402J1  |
| chr1  | 74350777 | 74351050 | promoter-1  | promoter-1  | -3      | NM_02715 | 69660  | Tmbim1    | 2310061BC  |
| chr17 | 50650302 | 50650425 | intron (NM  | intron (NM  | 1491    | NM_01388 | 224860 | Plcl2     | PLC-L2 PRI |
| chr5  | 92514902 | 92515075 | Intergenic  | Intergenic  | -2227   | NM_00108 | 23881  | G3bp2     | AA409541   |
| chr16 | 24238502 | 24238700 | Intergenic  | Intergenic  | -154835 | NM_17866 | 210126 | Lpp       | 9430020K1  |
| chr9  | 72974077 | 72974250 | Intergenic  | Intergenic  | 12887   | NM_19860 | 225215 | Rsl24d1   | 2410159K2  |
| chr4  | 1.09E+08 | 1.09E+08 | promoter-1  | promoter-1  | -822    | NM_14615 | 230598 | Nrd1      | 260001100  |
| chr1  | 1.84E+08 | 1.84E+08 | Intergenic  | Intergenic  | -11812  | NM_00114 | 170725 | Capn8     | nCL-2 nCL- |
| chr2  | 1.26E+08 | 1.26E+08 | intron (NM  | intron (NM  | 9118    | NM_17760 | 70354  | Secisbp2l | 311000120  |
| chr5  | 1.03E+08 | 1.03E+08 | 5' UTR (NM  | 5' UTR (NM  | 128     | NM_02927 | 231532 | Arhgap24  | 0610025G2  |
| chr6  | 1.29E+08 | 1.29E+08 | Intergenic  | Intergenic  | -17230  | NM_03059 | 80782  | Klrb1b    | Klrb1d Ly5 |
| chr10 | 1.11E+08 | 1.11E+08 | promoter-1  | promoter-1  | 100     | NM_17861 | 52705  | Krr1      | 2610511F0  |
| chr1  | 72258552 | 72258875 | 5' UTR (NM  | 5' UTR (NM  | 168     | NM_00100 | 381269 | Mreg      | Gm974 Wt   |
| chr1  | 88445552 | 88445750 | intron (NM  | RSINE1 SIN  | 22340   | NM_00897 | 19231  | Ptma      | Thym       |
| chr11 | 94068427 | 94068525 | Intergenic  | Intergenic  | -4292   | NM_00942 | 22057  | Tob1      | Tob Trob   |
| chr1  | 1.36E+08 | 1.36E+08 | Intergenic  | Intergenic  | -47739  | NM_21361 | 381290 | Atp2b4    | Pmca4      |
| chr3  | 1.1E+08  | 1.1E+08  | intron (NM  | intron (NM  | 200389  | NM_00116 | 80883  | Ntng1     | A930010CC  |
| chr7  | 16986552 | 16986750 | exon (NM_   | exon (NM_   | 106     | NM_19863 | 330474 | Zc3h4     | Bwq1 Gm7   |
| chr15 | 98699452 | 98699550 | intron (NM  | intron (NM  | 2135    | NM_00103 | 381022 | Kmt2d     | ALR BC032  |
| chr13 | 67370102 | 67370250 | promoter-1  | promoter-1  | -172    | NM_00100 | 238690 | Zfp458    | BC062958   |
| chr12 | 13255702 | 13256050 | intron (NM  | CpG         | 104     | NM_13404 | 104721 | Ddx1      | AA409185   |
| chr1  | 18781527 | 18781825 | Intergenic  | Intergenic  | -311427 | NM_15315 | 226896 | Tfap2d    | Tcfap2d    |
| chr14 | 66844027 | 66844100 | intron (NM  | intron (NM  | -11674  | NM_00116 | 19229  | Ptk2b     | CADTK CAI  |
| chr13 | 65342277 | 65342525 | Intergenic  | CpG         | -35377  | NM_17529 | 97895  | Nlrp4f    | C330026NC  |
| chr3  | 1.08E+08 | 1.08E+08 | intron (NM  | intron (NM  | 14656   | NM_01997 | 20661  | Sort1     | 2900053A1  |
| chr2  | 75543177 | 75543525 | promoter-1  | promoter-1  | -653    | NM_01090 | 18024  | Nfe2l2    | AI194320 I |
| chr19 | 36339752 | 36340150 | Intergenic  | MIRb SINE   | -113606 | NM_02950 | 76073  | Pcgf5     | 0610009F0  |
| chr4  | 1.06E+08 | 1.06E+08 | intron (NM  | intron (NM  | 767     | NM_15356 | 100102 | Pcsk9     | AI415265 , |
| chr16 | 57607227 | 57607475 | promoter-1  | promoter-1  | -371    | NM_02559 | 66497  | Cmss1     | 1110001AC  |
| chr3  | 51365502 | 51365575 | promoter-1  | promoter-1  | -793    | NM_08079 | 73251  | Setd7     | 1600028F2  |
| chr10 | 92574052 | 92574400 | Intergenic  | MER94 DN    | -49395  | NM_14623 | 237459 | Cdk17     | 6430598J1  |
| chr4  | 3739702  | 3740050  | Intergenic  | RLTR45 LT   | 22871   | NM_02614 | 67427  | Rps20     | 4632426KC  |
| chr8  | 1.05E+08 | 1.05E+08 | Intergenic  | Intergenic  | 270498  | NM_00986 | 12552  | Cdh11     | Cad11      |
| chr11 | 23976802 | 23977000 | Intergenic  | CpG         | -1155   | NM_01670 | 14025  | Bcl11a    | 2810047E1  |
| chr9  | 71508577 | 71508775 | intron (NM  | intron (NM  | -68509  | NM_00103 | 102371 | Myzap     | AA407270   |
| chr9  | 96805502 | 96805675 | Intergenic  | Intergenic  | -15695  | NM_00128 | 235534 | Pxylp1    | 9430094M   |
| chr15 | 5296577  | 5296700  | Intergenic  | Intergenic  | -102451 | NM_00896 | 19219  | Ptger4    | EP4 Ptgere |
| chr19 | 9016027  | 9016200  | promoter-1  | promoter-1  | -297    | NM_01184 | 23942  | Mta2      | AW550797   |
| chr14 | 35122852 | 35122925 | intron (NM  | intron (NM  | 801     | NM_02938 | 75698  | Fam35a    | 3110001K2  |
| chr10 | 60149827 | 60150025 | intron (NR_ | CpG-1077    | 9312    | NM_00125 | 22295  | Cdh23     | 4930542AC  |
| chr2  | 84877502 | 84877800 | promoter-1  | promoter-1  | 43      | NM_00113 | 20833  | Ssrp1     | C81323 Hr  |
| chr1  | 37267177 | 37267300 | Intergenic  | LTR41B LT   | -7885   | NM_00128 | 12790  | Cnga3     | CNG3       |
| chr7  | 29225927 | 29226500 | intron (NM  | intron (NM  | 257     | NM_00103 | 63986  | Gmfg      | 0610039G1  |
| chr2  | 3388602  | 3388825  | intron (NR_ | intron (NR_ | 3545    | NM_02272 | 64707  | Suv39h2   | 4930507K2  |
| chr1  | 1.07E+08 | 1.07E+08 | intron (NM  | CpG         | 586     | NM_17877 | 320311 | Rnf152    | A930029BC  |
| chr1  | 1.33E+08 | 1.33E+08 | Intergenic  | Intergenic  | -22196  | NM_01054 | 16153  | Il10      | CSIF Il-10 |

|       |          |          |            |            |         |          |        |           |              |
|-------|----------|----------|------------|------------|---------|----------|--------|-----------|--------------|
| chr3  | 90472777 | 90473050 | promoter-1 | promoter-1 | -80     | NM_01365 | 20201  | S100a8    | 60B8Ag AI    |
| chr4  | 1.34E+08 | 1.34E+08 | 5' UTR (NM | 5' UTR (NM | 342     | NM_20723 | 230815 | Man1c1    | AI593348     |
| chr16 | 23855402 | 23855700 | Intergenic | Intergenic | 35379   | NM_00921 | 20604  | Sst       | SOM SRIF     |
| chr13 | 91062627 | 91062875 | promoter-1 | promoter-1 | 24      | NM_02417 | 66475  | Rps23     | 2410044J1.   |
| chr12 | 1.12E+08 | 1.12E+08 | promoter-1 | promoter-1 | -483    | NM_02714 | 69641  | Wdr20     | 2310040A1    |
| chr18 | 65257252 | 65257375 | intron (NM | intron (NM | 74132   | NM_03188 | 83814  | Nedd4l    | 1300012CC    |
| chr1  | 1.35E+08 | 1.35E+08 | intron (NM | CpG        | 524     | NM_00109 | 240752 | Pik3c2b   | C330011J1    |
| chr3  | 1.08E+08 | 1.08E+08 | intron (NM | intron (NM | 2031    | NM_00128 | 109674 | Ampd2     | 1200014F0    |
| chr1  | 1.52E+08 | 1.52E+08 | promoter-1 | promoter-1 | -5      | NM_13378 | 108989 | Tpr       | 2610029M     |
| chr1  | 1.46E+08 | 1.46E+08 | Intergenic | Intergenic | -2559   | NM_00906 | 19735  | Rgs2      | GOS8         |
| chr2  | 34726552 | 34727050 | promoter-1 | promoter-1 | -319    | NM_08055 | 66998  | Psmd5     | 1500032AC    |
| chr7  | 1.5E+08  | 1.5E+08  | 5' UTR (NM | 5' UTR (NM | 158     | NM_13365 | 12520  | Cd81      | Tapa-1 Taq   |
| chr2  | 84510402 | 84510575 | TTS (NM_0  | TTS (NM_0  | 377     | NM_00103 | 72657  | 2700094K1 | Selh         |
| chr8  | 26825752 | 26826150 | 3' UTR (NM | 3' UTR (NM | -4569   | NR_12164 | 71910  | Ppapdc1b  | 1810019DC    |
| chr9  | 21043352 | 21043425 | 5' UTR (NM | 5' UTR (NM | 388     | NM_01667 | 50868  | Keap1     | INRF2 mKI    |
| chr9  | 1.24E+08 | 1.24E+08 | Intergenic | Intergenic | 17487   | NM_00991 | 12768  | Ccr1      | Cmkbr1 M     |
| chr3  | 97571177 | 97571275 | exon (NM_  | exon (NM_  | 711     | NR_11036 | 83679  | Pde4dip   | 4732458AC    |
| chr2  | 79920327 | 79920975 | intron (NM | intron (NM | 48477   | NM_01674 | 18573  | Pde1a     | AI987702 ,   |
| chr5  | 32441277 | 32441400 | intron (NM | intron (NM | 2493    | NM_00803 | 14284  | Fosl2     | Fra-2        |
| chr11 | 44203677 | 44203850 | Intergenic | Intergenic | -9802   | NM_00835 | 16160  | Il12b     | Il-12b Il-12 |
| chr19 | 42251427 | 42251650 | intron (NM | intron (NM | 6481    | NM_00116 | 319740 | Zfyve27   | 2210011NC    |
| chr1  | 74634302 | 74634475 | promoter-1 | promoter-1 | 214     | NM_02988 | 77264  | Zfp142    | 9330177B1    |
| chr10 | 1.17E+08 | 1.17E+08 | intron (NM | CpG        | 335     | NM_13401 | 103468 | Nup107    | AW541137     |
| chr7  | 73253827 | 73253975 | promoter-1 | promoter-1 | -500    | NM_00108 | 269941 | Chsy1     | mKIAA099(    |
| chr1  | 40572127 | 40572200 | promoter-1 | promoter-1 | -44     | NM_01055 | 16174  | Il18rap   | AcPL IL-18   |
| chr18 | 39829702 | 39829975 | Intergenic | Intergenic | -103313 | NM_01103 | 18459  | Pabpc2    | Pabp Pabp    |
| chr6  | 88415177 | 88415275 | promoter-1 | promoter-1 | -191    | NM_01968 | 56505  | Ruvbl1    | 2510009GC    |
| chr2  | 1.2E+08  | 1.2E+08  | exon (NM_  | exon (NM_  | 353     | NM_01194 | 26390  | Mapkbp1   | 2810483F2    |
| chr7  | 1.49E+08 | 1.49E+08 | Intergenic | Intergenic | -10258  | NM_00119 | 1E+08  | Gm4559    | -            |
| chr12 | 80399027 | 80399100 | intron (NM | intron (NM | 725     | NM_00125 | 19363  | Rad51b    | AI553500     |
| chr7  | 1.49E+08 | 1.49E+08 | promoter-1 | promoter-1 | 161     | NM_01687 | 54006  | Deaf1     | AU042387     |
| chr12 | 66923252 | 66923625 | Intergenic | L1MC2 LIN  | 461950  | NM_00116 | 238217 | Rpl10l    | EG238217     |
| chr5  | 1.49E+08 | 1.49E+08 | intron (NM | CpG        | 392     | NM_00751 | 11987  | Slc7a1    | 4831426KC    |
| chr7  | 38891777 | 38891850 | exon (NM_  | exon (NM_  | 696     | NM_00763 | 12447  | Ccne1     | AW538188     |
| chr5  | 96638052 | 96638175 | Intergenic | Intergenic | -1021   | NM_00103 | 94061  | Mrpl1     | 2410002L0    |
| chr9  | 85220102 | 85220275 | exon (NM_  | exon (NM_  | 543     | NM_00116 | 212943 | Fam46a    | D930050G(    |
| chr12 | 36710077 | 36710275 | Intergenic | Intergenic | -9336   | NM_01178 | 23795  | Agr2      | Agr2h Gob    |
| chr8  | 49195527 | 49195675 | non-coding | non-coding | 234     | NM_00116 | 320685 | Dctd      | 6030466NC    |
| chr1  | 1.68E+08 | 1.68E+08 | intron (NM | B1_Mus2 :  | 4074    | NM_17859 | 226594 | Rcsd1     | A430105K1    |
| chr4  | 1.47E+08 | 1.47E+08 | exon (NM_  | exon (NM_  | 147     | NM_02984 | 77034  | 2510039O: | Kiaa2013     |
| chr6  | 86634252 | 86634375 | intron (NM | intron (NM | 172     | NM_02566 | 66618  | Snrnp27   | 2610209M     |
| chr19 | 56623102 | 56623250 | promoter-1 | promoter-1 | 425     | NM_02581 | 66866  | Nhlrc2    | 1200003GC    |
| chr17 | 35272177 | 35272275 | promoter-1 | promoter-1 | 103     | NM_05717 | 224727 | Bag6      | 2410045D2    |
| chr10 | 1.07E+08 | 1.07E+08 | Intergenic | Intergenic | -115536 | NM_00117 | 628870 | Otogl     | EG628870     |
| chr2  | 78900602 | 78900700 | Intergenic | Intergenic | 191447  | NM_00945 | 22193  | Ube2e3    | Ubce4 ubc    |
| chr3  | 1.16E+08 | 1.16E+08 | intron (NM | (TAGA)n Si | 75774   | NM_00108 | 229776 | Cdc14a    | A830059A1    |
| chr4  | 1.32E+08 | 1.32E+08 | intron (NM | intron (NM | 1291    | NM_00103 | 230787 | Themis2   | ICB-1        |

|       |          |          |            |            |        |          |        |           |            |
|-------|----------|----------|------------|------------|--------|----------|--------|-----------|------------|
| chr6  | 1.18E+08 | 1.18E+08 | Intergenic | Tigger6a D | 17568  | NM_00100 | 22685  | Zfp239    | Mok-2 Mo   |
| chr7  | 1.09E+08 | 1.09E+08 | promoter-1 | promoter-1 | 31     | NM_00129 | 75430  | Anapc15   | 3200002M   |
| chr2  | 1.26E+08 | 1.26E+08 | intron (NM | intron (NM | 24676  | NM_00108 | 241633 | Atp8b4    | A530043E1  |
| chr5  | 48763652 | 48763775 | promoter-1 | promoter-1 | 82     | NM_02575 | 66768  | Pacrgl    | 4933428G0  |
| chr8  | 72426277 | 72426350 | exon (NM_  | exon (NM_  | 144    | NM_02331 | 67184  | Ndufa13   | 2700054G1  |
| chr13 | 1.13E+08 | 1.13E+08 | Intergenic | Intergenic | -29783 | NM_00116 | 77318  | Ankrd55   | C030011J0  |
| chr1  | 1.83E+08 | 1.83E+08 | Intergenic | Intergenic | -40371 | NM_02840 | 72978  | Cnih3     | 2900075G0  |
| chr8  | 97561577 | 97561650 | intron (NM | (TG)n Simf | -17390 | NM_00104 | 330830 | Ccdc135   | Gm770 SR   |
| chr7  | 1.34E+08 | 1.34E+08 | Intergenic | Intergenic | 3497   | NM_00926 | 20768  | Sephs2    | Sps2 Ysg3  |
| chr17 | 34325027 | 34325200 | promoter-1 | promoter-1 | 612    | NM_01368 | 21354  | Tap1      | ABC17 AP1  |
| chr3  | 51144777 | 51144950 | promoter-1 | promoter-1 | -297   | NM_02350 | 69257  | Elf2      | 2610036A2  |
| chr18 | 68092777 | 68092900 | promoter-1 | promoter-1 | -73    | NM_17263 | 52662  | Ldlrad4   | 8230401C2  |
| chr3  | 1.27E+08 | 1.27E+08 | 5' UTR (NV | 5' UTR (NV | 113    | NM_00971 | 11924  | Neurog2   | Atoh4 Mat  |
| chr12 | 81536027 | 81536425 | intron (NM | CpG        | 1362   | NM_17726 | 320808 | Dcaf5     | 9430020BC  |
| chr1  | 45981277 | 45982125 | intron (NM | intron (NM | 738    | NM_01691 | 53945  | Slc40a1   | Dusg Fpn1  |
| chr7  | 1.28E+08 | 1.28E+08 | promoter-1 | promoter-1 | -226   | NM_00126 | 13631  | Eef2k     | C86191 eE  |
| chr8  | 1.23E+08 | 1.23E+08 | intron (NM | intron (NM | 52606  | NM_03020 | 78892  | Crispld2  | 1810049K2  |
| chr1  | 1.95E+08 | 1.95E+08 | intron (NM | intron (NM | 592    | NM_18104 | 319266 | A130010J1 | -          |
| chr5  | 1.24E+08 | 1.24E+08 | intron (NM | intron (NM | 217    | NM_02660 | 68184  | Denr      | 1500003K0  |
| chr8  | 37185477 | 37185650 | intron (NM | intron (NM | 27681  | NM_17291 | 244418 | D8ErtD82e | 9830148H2  |
| chr4  | 1.36E+08 | 1.36E+08 | intron (NM | CpG        | 335    | NM_02591 | 67025  | Rpl11     | 2010203J1' |
| chr16 | 18248452 | 18248700 | promoter-1 | promoter-1 | 211    | NM_01123 | 19385  | Ranbp1    | Htf9a      |
| chr19 | 54232527 | 54232600 | Intergenic | Intergenic | 112891 | NM_00741 | 11551  | Adra2a    | AW122659   |
| chr5  | 1.25E+08 | 1.25E+08 | promoter-1 | promoter-1 | -209   | NM_02567 | 66627  | Ogfod2    | 1300006G1  |
| chr8  | 96703627 | 96703775 | intron (NM | intron (NM | 712    | NM_01360 | 17748  | Mt1       | MT-1 Mt-1  |
| chr4  | 58253377 | 58253500 | Intergenic | Intergenic | -33970 | NM_02281 | 64817  | Svep1     | 1110021D1  |
| chr2  | 1.79E+08 | 1.79E+08 | intron (NM | RLTR45 LT  | 172318 | NM_00986 | 12561  | Cdh4      | AW120700   |
| chr14 | 65988452 | 65988650 | intron (NM | intron (NM | 11038  | NM_19902 | 380912 | Zfp395    | BC053701   |
| chr1  | 1.77E+08 | 1.77E+08 | Intergenic | L1MB8 LIN  | -16337 | NM_00119 | 24012  | Rgs7      | -          |
| chr14 | 51490077 | 51490225 | promoter-1 | promoter-1 | 78     | NM_00935 | 21745  | Tep1      | Tp1        |
| chr11 | 50103777 | 50103925 | intron (NM | intron (NM | 1987   | NM_17533 | 103806 | Maml1     | AI644666 , |
| chr3  | 1.33E+08 | 1.33E+08 | Intergenic | Intergenic | -21373 | NM_02995 | 77669  | Arhgef38  | 9130221D2  |
| chr7  | 73532852 | 73533150 | intron (NM | CpG        | 226    | NM_14619 | 233328 | Lrrk1     | AW319595   |
| chr14 | 27456927 | 27457000 | promoter-1 | promoter-1 | -720   | NM_00747 | 11843  | Arf4      | AA407803   |
| chr3  | 95908527 | 95908700 | 5' UTR (NV | 5' UTR (NV | 163    | NM_00102 | 229603 | Otud7b    | 2900060B2  |
| chr2  | 83484777 | 83485025 | intron (NM | CpG        | 166    | NM_02693 | 69082  | Zc3h15    | 1700006A1  |
| chr1  | 82811202 | 82811450 | Intergenic | Intergenic | -24732 | NM_01047 | 15463  | Agfg1     | AU045498   |
| chr7  | 1.13E+08 | 1.13E+08 | promoter-1 | promoter-1 | -13    | NM_01056 | 16202  | Ilk       | AA511515   |
| chr4  | 53843677 | 53843850 | intron (NM | intron (NM | 4846   | NM_02805 | 52076  | Tmem38b   | 1600017F2  |
| chr17 | 28147552 | 28147650 | intron (NM | intron (NM | 69928  | NM_01368 | 21463  | Tcp11     | D17Ken1 T  |
| chr13 | 51494252 | 51494400 | Intergenic | Intergenic | -9661  | NM_01010 | 13610  | S1pr3     | AI132464 I |
| chr1  | 65159077 | 65159225 | intron (NM | intron (NM | -9214  | NM_00777 | 12964  | Cryga     | Cryg-4 DG0 |
| chr5  | 36243927 | 36244025 | intron (NM | intron (NM | 8008   | NM_02737 | 70292  | Afap1     | 2600003E2  |
| chr5  | 1.22E+08 | 1.22E+08 | intron (NM | intron (NM | 2372   | NM_17272 | 231713 | Naa25     | 4833422K1  |
| chr2  | 75630927 | 75631050 | Intergenic | Intergenic | -39246 | NM_17266 | 228061 | Agps      | 5832437L2  |
| chr5  | 1.19E+08 | 1.19E+08 | intron (NM | intron (NM | 55023  | NM_17242 | 76199  | Med13l    | 221041311  |
| chr11 | 69659677 | 69659750 | promoter-1 | promoter-1 | -161   | NM_00116 | 70310  | Plscr3    | 221040302  |

|       |          |          |            |            |         |           |        |          |            |
|-------|----------|----------|------------|------------|---------|-----------|--------|----------|------------|
| chr10 | 1.28E+08 | 1.28E+08 | Intergenic | B1_Mm SI   | -3120   | NM_00108  | 210582 | Coq10a   | Gm1        |
| chr8  | 96590802 | 96591150 | TTS (NM_0  | TTS (NM_0  | 29878   | NM_00109  | 270086 | Ogfod1   | 4930415J2  |
| chr4  | 53425002 | 53425150 | Intergenic | MTD LTR I  | -28209  | NM_00115  | 100434 | Slc44a1  | 2210409B2  |
| chr9  | 1.08E+08 | 1.08E+08 | promoter-1 | promoter-1 | -237    | NM_00127  | 13138  | Dag1     | D9Wsu13e   |
| chr4  | 54141852 | 54142100 | Intergenic | Intergenic | 303059  | NM_02805  | 52076  | Tmem38b  | 1600017F2  |
| chr13 | 37213477 | 37213750 | Intergenic | Intergenic | -71500  | NM_00116  | 74145  | F13a1    | 1200014I0: |
| chr7  | 1.49E+08 | 1.49E+08 | intron (NM | L1MC4a LI  | 2117    | NM_01152  | 21351  | Taldo1   | -          |
| chr2  | 66041077 | 66041250 | intron (NM | L1MB3 LIN  | 53511   | NM_00104  | 73668  | Ttc21b   | 2410066K1  |
| chr5  | 1.22E+08 | 1.22E+08 | promoter-1 | promoter-1 | -355    | NM_00965  | 11669  | Aldh2    | Ahd-5 Ahd  |
| chr1  | 51624752 | 51625025 | Intergenic | Intergenic | -89645  | NM_02869  | 109019 | Nabp1    | 4930434HC  |
| chr11 | 1.1E+08  | 1.1E+08  | intron (NM | intron (NM | 20554   | NM_14722  | 217262 | Abca9    | D630040KC  |
| chr11 | 70460152 | 70460425 | promoter-1 | promoter-1 | 253     | NM_02421  | 67863  | Slc25a11 | 2310022P1  |
| chr5  | 1.16E+08 | 1.16E+08 | intron (NM | intron (NM | 21099   | NM_03186  | 19079  | Prkab1   | 1300015D2  |
| chr16 | 32102402 | 32102575 | intron (NM | intron (NM | 2600    | NM_02589  | 66994  | Cep19    | 1500031L0  |
| chr6  | 1.25E+08 | 1.25E+08 | intron (NM | intron (NM | 562     | NM_13874  | 110109 | Nop2     | 120kDa A5  |
| chr2  | 44776202 | 44776375 | Intergenic | Intergenic | -59146  | NM_17266  | 227835 | Gtdc1    | E330008O2  |
| chr12 | 56920052 | 56920325 | intron (NM | intron (NM | 2315    | NM_01999  | 56784  | Ralgapa1 | 2310003F2  |
| chr5  | 23072302 | 23072475 | intron (NM | intron (NM | 50001   | NM_00927  | 20817  | Srpk2    | AW226533   |
| chr13 | 53076952 | 53077150 | promoter-1 | promoter-1 | -643    | NM_01737  | 18030  | Nfil3    | AV225605   |
| chr7  | 1.52E+08 | 1.52E+08 | intron (NM | intron (NM | 23614   | NM_00780  | 13043  | Ctnn     | 1110020L0  |
| chr16 | 23988627 | 23988725 | promoter-1 | promoter-1 | 22      | NM_00974  | 12053  | Bcl6     | Bcl5       |
| chr1  | 1.64E+08 | 1.64E+08 | Intergenic | Intergenic | -42021  | NM_17264  | 226551 | Suco     | 4732491B1  |
| chr15 | 99330752 | 99330850 | intron (NM | intron (NM | -25640  | NM_02923  | 75284  | Bcdin3d  | 4930556PC  |
| chr15 | 84753077 | 84753250 | promoter-1 | promoter-1 | -695    | NM_01671  | 18141  | Nup50    | 1700030KC  |
| chr14 | 73109752 | 73109975 | promoter-1 | promoter-1 | -53     | NM_20763  | 319448 | Fndc3a   | 1700094E1  |
| chr13 | 1E+08    | 1E+08    | promoter-1 | promoter-1 | 320     | NM_02687  | 68927  | Ptcd2    | 1190005PC  |
| chr2  | 18508902 | 18509075 | Intergenic | Intergenic | -85101  | NM_14777  | 12238  | Commd3   | AW550818   |
| chr15 | 78078027 | 78078100 | intron (NM | MIR SINE   | 2822    | NM_00867  | 17972  | Ncf4     | AI451400   |
| chr13 | 51806152 | 51806500 | intron (NM | intron (NM | 59243   | NM_02927  | 75420  | Secisbp2 | 2210413NC  |
| chr11 | 1.17E+08 | 1.17E+08 | intron (NM | intron (NM | 1936    | NM_00111  | 53860  | 9-Sep    | MSF1 Msf   |
| chr5  | 1.49E+08 | 1.49E+08 | intron (NM | L4 LINE R1 | 23363   | NM_01022  | 14254  | Flt1     | AI323757   |
| chr11 | 1.15E+08 | 1.15E+08 | intron (NM | MIRb SINE  | 3124    | NM_19922  | 217304 | Cd300lb  | CLM-7 Clr  |
| chr6  | 1.15E+08 | 1.15E+08 | Intergenic | L1MB7 LIN  | -24296  | NM_19903  | 381802 | Tsen2    | AU067695   |
| chrX  | 71157502 | 71157650 | promoter-1 | promoter-1 | -939    | NM_00116  | 171207 | Arhgap4  | A130009C1  |
| chr4  | 98787577 | 98787650 | promoter-1 | promoter-1 | -7      | NM_02608  | 67299  | Dock7    | 3110056M   |
| chrX  | 10615952 | 10616125 | Intergenic | MIR SINE   | -260345 | NM_00111  | 1E+08  | Gm14483  | OTTMUSGC   |
| chr16 | 78296477 | 78296625 | Intergenic | Intergenic | -5365   | NM_00998  | 13052  | Cxadr    | 2610206DC  |
| chr2  | 91489952 | 91490150 | promoter-1 | promoter-1 | -103    | NM_00103  | 381410 | Zfp408   | Gm1011     |
| chr4  | 1.16E+08 | 1.16E+08 | Intergenic | Intergenic | -3063   | NM_14625  | 242642 | Hpd1     | A830048M   |
| chr16 | 23103902 | 23104050 | Intergenic | Intergenic | -3565   | NM_00112  | 13682  | Eif4a2   | 4833432NC  |
| chr7  | 1.22E+08 | 1.22E+08 | promoter-1 | promoter-1 | 208     | NM_01105  | 18576  | Pde3b    | 9830102AC  |
| chr1  | 21951702 | 21951775 | 5' UTR (NM | 5' UTR (NM | 285     | NM_00116  | 226922 | Kcnq5    | 7730402H1  |
| chr2  | 1.44E+08 | 1.44E+08 | intron (NM | intron (NM | 4111    | NM_00128  | 74528  | Mgme1    | 8430406I0: |
| chr9  | 15648477 | 15648900 | Intergenic | ETnERV-int | 30312   | NM_14571  | 244701 | Mtnr1b   | Mel-1B-R I |
| chr18 | 38578702 | 38578900 | exon (NM_  | exon (NM_  | 172     | NM_02299  | 65113  | Ndfip1   | 0610010M   |
| chr14 | 61479077 | 61479150 | intron (NM | intron (NM | 75710   | NR_040642 | 70478  | Mipep    | 5730405E0  |
| chr6  | 54884027 | 54884375 | intron (NM | intron (NM | 37454   | NM_00117  | 107607 | Nod1     | C230079P1  |



|       |          |          |             |            |         |           |        |           |            |
|-------|----------|----------|-------------|------------|---------|-----------|--------|-----------|------------|
| chr3  | 1.52E+08 | 1.52E+08 | Intergenic  | Intergenic | -8884   | NM_00896  | 19220  | Ptgrfr    | AI957154 I |
| chr2  | 1.03E+08 | 1.03E+08 | intron (NM  | intron (NM | 39959   | NM_17889  | 99382  | Abtb2     | AW539457   |
| chr1  | 99557577 | 99557875 | intron (NM  | CpG        | 869     | NM_13382  | 52392  | D1Ertd622 | AI987691 , |
| chr8  | 1.18E+08 | 1.18E+08 | Intergenic  | Intergenic | 283606  | NM_00102  | 17132  | Maf       | 2810401A2  |
| chr3  | 1.03E+08 | 1.03E+08 | Intergenic  | Intergenic | 100197  | NM_00107  | 94093  | Trim33    | 8030451N0  |
| chr9  | 78299002 | 78299175 | intron (NM  | intron (NM | 3071    | NM_02665  | 68291  | Mto1      | 2310039H0  |
| chr10 | 1.18E+08 | 1.18E+08 | promoter-1  | promoter-1 | -742    | NM_00101  | 69181  | Dyrk2     | 1810038L1  |
| chr17 | 3115452  | 3115725  | intron (NM  | CpG        | 616     | NM_13412  | 106583 | Scaf8     | A630086M   |
| chr11 | 1.21E+08 | 1.21E+08 | promoter-1  | promoter-1 | -77     | NM_02774  | 71276  | Ccdc57    | 4933434G0  |
| chr15 | 76528127 | 76528325 | intron (NM  | intron (NM | 1032    | NM_18280  | 76282  | Gpt       | 1300007J0  |
| chr6  | 29297552 | 29297825 | promoter-1  | promoter-1 | -418    | NM_00759  | 12321  | Calu      | 9530075H2  |
| chr6  | 99195227 | 99195350 | intron (NM  | intron (NM | 21221   | NM_00119  | 108655 | Foxp1     | 3110052D1  |
| chr19 | 45734152 | 45734325 | intron (NM  | CpG        | 445     | NM_01390  | 30838  | Fbxw4     | Dac Fbw4   |
| chr12 | 86940302 | 86940375 | promoter-1  | promoter-1 | -28     | NM_03088  | 81703  | Jdp2      | Jundm2 Ju  |
| chr7  | 51654552 | 51654900 | intron (NM  | GA-rich Lo | 15230   | NM_01666  | 20981  | Syt3      | AI385753 : |
| chr3  | 54828427 | 54828850 | Intergenic  | Intergenic | 30339   | NM_00762  | 12427  | Ccna1     | -          |
| chr19 | 44040177 | 44040300 | intron (NM  | intron (NM | 20772   | NM_03070  | 93721  | Cpn1      | 0610011F2  |
| chr14 | 76510652 | 76511175 | promoter-1  | promoter-1 | 215     | NM_01374  | 27275  | Nufip1    | Nufip      |
| chr11 | 71064952 | 71065050 | intron (NR  | RMER21A    | -20766  | NM_00104  | 637515 | Nlrp1b    | ENSMUSG0   |
| chr14 | 68669477 | 68669625 | Intergenic  | Intergenic | -32390  | NM_01091  | 18039  | Nefl      | AI847934 0 |
| chr11 | 9600452  | 9600525  | Intergenic  | Intergenic | 508543  | NM_17825  | 268379 | Abca13    | 9830132L2  |
| chr7  | 25687527 | 25687650 | promoter-1  | promoter-1 | -417    | NM_00113  | 16801  | Arhgef1   | Lbcl2 Lsc  |
| chr3  | 1.22E+08 | 1.22E+08 | promoter-1  | promoter-1 | -424    | NM_00812  | 14630  | Gclm      | AI649393 0 |
| chr15 | 76338702 | 76338950 | intron (NM  | intron (NM | 3422    | NM_01004  | 13350  | Dgat1     | ARAT C750  |
| chr11 | 96777452 | 96777650 | intron (NM  | CpG-2511   | 244     | NM_03024  | 80280  | Cdk5rap3  | 1810007E2  |
| chr6  | 1.19E+08 | 1.19E+08 | exon (NM_   | exon (NM_  | 602     | NM_13394  | 101358 | Fbxl14    | AW322056   |
| chr12 | 55302377 | 55302450 | intron (NM  | intron (NM | 2448    | NM_02813  | 112407 | Egln3     | 2610021G0  |
| chr13 | 76080702 | 76080875 | exon (NM_   | exon (NM_  | 484     | NM_02849  | 73296  | Rhobtb3   | 1700040C1  |
| chr19 | 5295402  | 5295525  | promoter-1  | promoter-1 | -8      | NM_03010  | 319322 | Sf3b2     | 145kDa 26  |
| chr12 | 82096627 | 82096725 | Intergenic  | B3 SINE B  | -27610  | NM_00117  | 20493  | Slc10a1   | Ntcp       |
| chr2  | 24774827 | 24774975 | intron (NM  | CpG        | 228     | NM_17254  | 77683  | Ehmt1     | 9230102N1  |
| chr4  | 45994027 | 45994175 | intron (NM  | intron (NM | 8932    | NM_14614  | 100121 | Tdrd7     | 5730495N1  |
| chr4  | 1.33E+08 | 1.33E+08 | intron (NM  | CpG        | 342     | NM_14615  | 230793 | Ahdc1     | D030015G:  |
| chr4  | 48485827 | 48486325 | intron (NM  | CpG        | 218     | NM_17230  | 269536 | Tex10     | 2610206N1  |
| chr7  | 29655977 | 29656300 | Intergenic  | MER58B D   | 6733    | NM_00849  | 16858  | Lgals7    | Galectin-7 |
| chr7  | 1.26E+08 | 1.26E+08 | exon (NM_   | exon (NM_  | 863     | NM_00103  | 319622 | Itpr1p12  | C130081G2  |
| chr11 | 1.2E+08  | 1.2E+08  | promoter-1  | promoter-1 | 52      | NM_00116  | 72055  | Slc38a10  | 1810073N0  |
| chr10 | 89203802 | 89204000 | Intergenic  | Intergenic | -3835   | NM_02916  | 75089  | Uhrf1bp1l | 2010319N2  |
| chr5  | 1.3E+08  | 1.3E+08  | intron (NM  | CpG        | 257     | NM_00939  | 19384  | Ran       | -          |
| chr19 | 3404427  | 3404550  | intron (NM  | (CAG)n Sin | 9969    | NM_01025  | 14419  | Gal       | Galn       |
| chr11 | 72074052 | 72074200 | intron (NM  | intron (NM | 5980    | NM_00100  | 237831 | Slc13a5   | Indy NaC2, |
| chr11 | 1.07E+08 | 1.07E+08 | exon (NM_   | exon (NM_  | 178     | NR_027785 | 50776  | Polg2     | -          |
| chr2  | 60048052 | 60048150 | 5' UTR (NV  | 5' UTR (NV | 108     | NM_02057  | 57438  | 7-Mar     | Axo Axot 0 |
| chr1  | 1.53E+08 | 1.53E+08 | Intergenic  | MLT1H LTI  | -93390  | NM_00103  | 117198 | Ivns1abp  | 1190004M   |
| chr5  | 1.41E+08 | 1.41E+08 | intron (NML | L1MC5 LIN  | 1259    | NM_01030  | 14673  | Gna12     | AI414047 , |
| chr6  | 1.24E+08 | 1.24E+08 | Intergenic  | MLT1F1 LT  | -13511  | NM_15350  | 232370 | Clstn3    | CSTN3 Cs3  |
| chr14 | 22123377 | 22123550 | intron (NM  | intron (NM | -195529 | NM_00120  | 54169  | Kat6b     | AI507552 I |

|       |          |          |                     |            |         |          |        |           |            |
|-------|----------|----------|---------------------|------------|---------|----------|--------|-----------|------------|
| chr8  | 74061252 | 74061325 | promoter-1          | promoter-1 | 48      | NM_19809 | 69550  | Bst2      | 23100151H  |
| chr8  | 82726577 | 82726675 | Intergenic          | Intergenic | -144719 | NM_02025 | 15245  | Hhip      | Hhip1      |
| chr5  | 1.23E+08 | 1.23E+08 | intron (NMB1_Mur2 S |            | 4368    | NM_17542 | 109305 | Orai1     | D730049H   |
| chr2  | 1.46E+08 | 1.46E+08 | TTS (NM_0           | TTS (NM_0  | -14714  | NM_02642 | 67877  | Naa20     | 1500004D1  |
| chr17 | 34257877 | 34258075 | intron (NM          | CpG-6277   | 716     | NM_01023 | 14312  | Brd2      | AW228947   |
| chr15 | 47615077 | 47615200 | intron (NM          | intron (NM | 1008397 | NM_00108 | 239420 | Csmd3     | 4930500N1  |
| chr12 | 76853327 | 76853400 | Intergenic          | Intergenic | -16647  | NM_03075 | 81535  | Sgpp1     | AI463453 S |
| chr3  | 41368602 | 41368675 | promoter-1          | promoter-1 | -164    | NM_00113 | 269424 | Jade1     | AU041499   |
| chr8  | 1.08E+08 | 1.08E+08 | Intergenic          | Intergenic | -1946   | NM_02653 | 68051  | Nutf2     | 270006710  |
| chr18 | 55069927 | 55070150 | intron (NM          | intron (NM | 79796   | NM_17575 | 269023 | Zfp608    | 4932417D1  |
| chr15 | 93228352 | 93228725 | promoter-1          | promoter-1 | 183     | NM_02602 | 67197  | Zcrb1     | 2700088M   |
| chr6  | 38304202 | 38304425 | 5' UTR (NV          | 5' UTR (NV | 290     | NM_02886 | 78781  | Zc3hav1   | 1200014N1  |
| chr8  | 1.25E+08 | 1.25E+08 | Intergenic          | Intergenic | -5559   | NM_00103 | 234839 | Piezo1    | 9630020g2  |
| chr14 | 31363302 | 31363450 | intron (NM          | intron (NM | 1059    | NM_00938 | 21881  | Tkt       | p68        |
| chr4  | 62009527 | 62009625 | intron (NM          | intron (NM | 12006   | NM_00104 | 338355 | Fkbp15    | BB131447   |
| chr5  | 44247027 | 44247300 | Intergenic          | Intergenic | -12903  | NM_00764 | 12494  | Cd38      | ADPRC 1 C  |
| chr9  | 64637727 | 64637800 | Intergenic          | Lx2 LINE L | -21055  | NM_00116 | 102442 | Dennd4a   | AI115600 , |
| chr9  | 1.06E+08 | 1.06E+08 | promoter-1          | promoter-1 | -272    | NM_02989 | 77305  | Wdr82     | 9430077D2  |
| chr1  | 72423202 | 72423275 | intron (NM          | intron (NM | 69243   | NM_00953 | 22596  | Xrcc5     | AI314015 I |
| chr9  | 20264277 | 20264750 | promoter-1          | promoter-1 | 91      | NM_01175 | 22688  | Zfp26     | 5033428CC  |
| chr2  | 35163902 | 35163975 | TTS (NM_0           | TTS (NM_0  | 26038   | NM_14612 | 227753 | Gsn       | ADF        |
| chr9  | 32461902 | 32462300 | Intergenic          | Intergenic | -41526  | NM_01180 | 23871  | Ets1      | AI196000 , |
| chr10 | 67460752 | 67460975 | intron (NM          | intron (NM | 18517   | NM_00108 | 170799 | Rtkn2     | B130039D2  |
| chr2  | 19579827 | 19579900 | promoter-1          | promoter-1 | 174     | NM_02771 | 71198  | Otud1     | 4933428L1  |
| chr6  | 42215027 | 42215200 | promoter-1          | promoter-1 | 75      | NM_00761 | 12366  | Casp2     | Caspase-2  |
| chr19 | 8810152  | 8810400  | promoter-1          | promoter-1 | -53     | NM_13413 | 107071 | Wdr74     | 5730436H2  |
| chr15 | 59491727 | 59491800 | Intergenic          | Intergenic | 11554   | NM_14454 | 211770 | Trib1     | A530090O:  |
| chr2  | 75656652 | 75657050 | Intergenic          | Intergenic | -13383  | NM_17266 | 228061 | Agps      | 5832437L2  |
| chr7  | 28516377 | 28516575 | promoter-1          | promoter-1 | 48      | NM_00956 | 22718  | Zfp60     | 6330516O:  |
| chr1  | 1.8E+08  | 1.8E+08  | Intergenic          | B1F SINE , | -5933   | NM_02551 | 66359  | Cox20     | 2310005N   |
| chr19 | 6077027  | 6077325  | promoter-1          | promoter-1 | 11      | NM_00108 | 68505  | Vps51     | 1110014N2  |
| chr2  | 1.29E+08 | 1.29E+08 | intron (NM          | intron (NM | 46887   | NM_17765 | 228592 | F830045P1 | Sirpb3     |
| chr19 | 5490677  | 5490950  | intron (NM          | CpG        | 358     | NM_00768 | 12631  | Cfl1      | AA959946   |
| chr10 | 93560802 | 93561225 | intron (NM          | intron (NM | -49663  | NM_01162 | 22025  | Nr2c1     | 4831444H   |
| chr10 | 1.2E+08  | 1.2E+08  | promoter-1          | promoter-1 | -183    | NM_02867 | 73914  | Irak3     | 4833428C1  |
| chr11 | 34520977 | 34521100 | intron (NM          | intron (NM | 76369   | NM_03337 | 94176  | Dock2     | AI662014 , |
| chr1  | 1.93E+08 | 1.93E+08 | Intergenic          | Intergenic | 63609   | NM_02542 | 66208  | Nenf      | 1110060M   |
| chr5  | 1.37E+08 | 1.37E+08 | intron (NM          | intron (NM | 6062    | NM_02171 | 60363  | Cldn15    | 2210009BC  |
| chr8  | 1.15E+08 | 1.15E+08 | 5' UTR (NV          | 5' UTR (NV | 101     | NM_01392 | 30947  | Adat1     | MMADAT1    |
| chr2  | 1.67E+08 | 1.67E+08 | 5' UTR (NV          | 5' UTR (NV | 111     | NM_17075 | 263876 | Spata2    | AI504642 I |
| chr19 | 33130777 | 33131075 | Intergenic          | Intergenic | 298859  | NM_00896 | 19211  | Pten      | 2310035O   |
| chr13 | 1.14E+08 | 1.14E+08 | promoter-1          | promoter-1 | 71      | NM_13079 | 170625 | Snx18     | Snag1      |
| chr9  | 1.04E+08 | 1.04E+08 | intron (NM          | intron (NM | 30759   | NM_00116 | 235567 | Dnajc13   | D030002L1  |
| chr10 | 5160602  | 5160975  | exon (NM_           | exon (NM_  | 8954    | NM_00107 | 64009  | Syne1     | 8B A33004  |
| chr2  | 90927927 | 90928175 | Intergenic          | Intergenic | -8903   | NM_01135 | 20375  | Spi1      | Dis-1 Dis1 |
| chr1  | 88130502 | 88130725 | intron (NM          | intron (NM | -69183  | NM_14522 | 227327 | B3gnt7    | C330001H2  |
| chr11 | 1.21E+08 | 1.21E+08 | intron (NM          | (GA)n Simj | 18150   | NM_00108 | 68837  | Foxk2     | 1110054H   |

|       |          |          |                       |         |           |        |           |            |
|-------|----------|----------|-----------------------|---------|-----------|--------|-----------|------------|
| chr13 | 43069952 | 43070075 | intron (NM MTEb LTR   | -148195 | NM_00100  | 218194 | Phactr1   | 9630030F1  |
| chr2  | 1.18E+08 | 1.18E+08 | Intergenic Intergenic | -143007 | NM_01158  | 21825  | Thbs1     | TSP-1 TSP1 |
| chrX  | 1.26E+08 | 1.26E+08 | intron (NM intron (NM | 1098    | NM_17249  | 54004  | Diap2     | Dia3 Diap1 |
| chr2  | 1.53E+08 | 1.53E+08 | Intergenic Intergenic | 5414    | NM_01049  | 15901  | Id1       | AI323524 I |
| chr11 | 1.16E+08 | 1.16E+08 | intron (NM intron (NM | 8328    | NM_00116  | 217344 | Rhbdf2    | 473246511  |
| chr14 | 75433827 | 75433975 | intron (NM intron (NM | 18067   | NM_19864  | 271221 | 5031414D1 | Gm744 Gn   |
| chr12 | 1.1E+08  | 1.1E+08  | intron (NM B4A SINE   | 43394   | NM_17760  | 212198 | Wdr25     | B930090D1  |
| chr10 | 1.25E+08 | 1.25E+08 | Intergenic RCHARR1 I  | -42172  | NM_01139  | 20503  | Slc16a7   | 4921534NC  |
| chr11 | 17080802 | 17081000 | intron (NM intron (NM | 21600   | NM_02445  | 19058  | Ppp3r1    | CaNB1 Cnt  |
| chr1  | 77928927 | 77929025 | Intergenic Intergenic | 264735  | NM_00878  | 18505  | Pax3      | Pax-3 Sp s |
| chr7  | 1.38E+08 | 1.38E+08 | promoter-1promoter-1  | 307     | NM_00102  | 11907  | Ate1      | AI225793 I |
| chr13 | 30347077 | 30347175 | Intergenic ID_B1 SINI | -81099  | NM_17732  | 11607  | Agtr1a    | 1810074K2  |
| chr7  | 66299027 | 66299200 | Intergenic ETnERV3-ir | -185007 | NM_17301  | 22215  | Ube3a     | 4732496BC  |
| chr17 | 66408877 | 66409000 | intron (NML1_Mus3 L   | 17448   | NM_00102  | 106585 | Ankrd12   | 2900001A1  |
| chr5  | 1.51E+08 | 1.51E+08 | intron (NM CpG        | 349     | NM_20136  | 381695 | N4bp212   | 2700092HC  |
| chr16 | 55973877 | 55974000 | promoter-1promoter-1  | 21      | NM_17302  | 271377 | Zbtb11    | 9230110GC  |
| chr10 | 61111302 | 61111625 | promoter-1promoter-1  | 94      | NM_02643  | 67895  | Ppa1      | 2010317E0  |
| chr3  | 1.08E+08 | 1.08E+08 | Intergenic Intergenic | -7556   | NM_01196  | 26442  | Psma5     | ZETA       |
| chr11 | 98300102 | 98300225 | intron (NM CpG        | 139     | NM_02555  | 103742 | Mien1     | 1810046J1  |
| chr1  | 1.57E+08 | 1.57E+08 | exon (NM_exon (NM_    | 765     | NM_01050  | 15939  | Ier5      | -          |
| chr9  | 1.19E+08 | 1.19E+08 | promoter-1promoter-1  | -216    | NM_13371  | 69274  | Ctdspl    | 2810418J2  |
| chr3  | 1.54E+08 | 1.54E+08 | exon (NM_exon (NM_    | 151     | NM_00996  | 12972  | Cryz      | Sez9       |
| chr12 | 99972902 | 99972975 | promoter-1promoter-1  | -83     | NM_01187  | 24000  | Ptpn21    | PTPD1 PTF  |
| chr4  | 1.43E+08 | 1.43E+08 | promoter-1promoter-1  | 84      | NM_17287  | 242736 | Pramef8   | 4732496OC  |
| chr6  | 83045727 | 83045825 | Intergenic A-rich Low | -5734   | NM_00108  | 243510 | Ccdc142   | A230058J2  |
| chr7  | 1.06E+08 | 1.06E+08 | intron (NM intron (NM | 116153  | NM_17863  | 78610  | Uvrag     | 9530039DC  |
| chr9  | 4376027  | 4376100  | Intergenic Intergenic | -7474   | NM_14560  | 78100  | Msantd4   | 8430410K2  |
| chr13 | 56804402 | 56804475 | promoter-1promoter-1  | 25      | NM_00116  | 17129  | Smad5     | 1110051M   |
| chr13 | 21622752 | 21623025 | promoter-1promoter-1  | 95      | NM_13914  | 93681  | Zkscan8   | 2510038J0  |
| chr5  | 90794427 | 90794500 | intron (NM CpG        | 748     | NM_03088  | 81702  | Ankrd17   | 4933425K2  |
| chr1  | 1.73E+08 | 1.73E+08 | promoter-1promoter-1  | -265    | NM_00100  | 226652 | Arhgap30  | 6030405PC  |
| chr9  | 5298552  | 5298700  | 5' UTR (NM 5' UTR (NM | 109     | NM_00980  | 12362  | Casp1     | ICE I11bc  |
| chr11 | 87965027 | 87965200 | intron (NM intron (NM | -17954  | NM_00117  | 103841 | Cuedc1    | AI841487 I |
| chr5  | 1.51E+08 | 1.51E+08 | intron (NM CpG        | 762     | NM_13389  | 100637 | N4bp211   | 2410024N1  |
| chr11 | 1.03E+08 | 1.03E+08 | Intergenic Intergenic | -1388   | NM_13875  | 192231 | Hexim1    | 7330426E1  |
| chr2  | 1.48E+08 | 1.48E+08 | exon (NM_exon (NM_    | 598     | NM_00937  | 21824  | Thbd      | AI385582 I |
| chr16 | 21955352 | 21955450 | 3' UTR (NM 3' UTR (NM | -7776   | NR_03777: | 66664  | Tmem41a   | 2900010KC  |
| chr19 | 48163502 | 48163625 | Intergenic MTC LTR I  | -116952 | NM_02569  | 66673  | Sorcs3    | 6330404A1  |
| chr18 | 3481202  | 3481275  | Intergenic RLTR41 LT  | -26717  | NM_02650  | 68010  | Bambi     | 2610003HC  |
| chr8  | 35198977 | 35199075 | 3' UTR (NM 3' UTR (NM | 10767   | NM_02660  | 68192  | Leprotl1  | 1110067H1  |
| chr11 | 1.18E+08 | 1.18E+08 | intron (NM CpG        | 189     | NM_17257  | 217364 | Engase    | C130099AC  |
| chr7  | 1.46E+08 | 1.46E+08 | intron (NM intron (NM | 62050   | NM_02870  | 74004  | Jakmip3   | 6330417GC  |
| chr9  | 50829352 | 50829600 | Intergenic Intergenic | -12298  | NM_17871  | 235344 | Sik2      | G630080D:  |
| chr16 | 20141177 | 20141450 | intron (NM CpG        | 177     | NM_00114  | 208146 | Yeats2    | BC042768   |
| chr8  | 67212002 | 67212350 | intron (NM intron (NM | 199     | NM_02543  | 66234  | Msmo1     | 1500001G1  |
| chr15 | 92832452 | 92832550 | Intergenic Intergenic | 273014  | NM_00103  | 223827 | Gxy1t1    | Glt8d3 Gr  |
| chr11 | 1.15E+08 | 1.15E+08 | Intergenic Intergenic | -14358  | NM_00111  | 70355  | Gprc5c    | 111002810  |

|       |          |          |             |             |        |           |        |           |            |
|-------|----------|----------|-------------|-------------|--------|-----------|--------|-----------|------------|
| chr13 | 41223652 | 41223725 | Intergenic  | Intergenic  | -18331 | NM_00810  | 107889 | Gcm2      | Gcm-rs1 G  |
| chr15 | 36646052 | 36646200 | Intergenic  | Intergenic  | 74561  | NM_00125  | 22631  | Ywhaz     | 11100131   |
| chr6  | 86388827 | 86389025 | 5' UTR (NM  | 5' UTR (NM  | 286    | NM_00124  | 232196 | C87436    | -          |
| chr11 | 60267852 | 60268225 | promoter-1  | promoter-1  | -81    | NM_02135  | 13495  | Drg2      | AI255295 , |
| chr15 | 77661652 | 77662050 | intron (NM  | intron (NM  | 10754  | NM_02241  | 17886  | Myh9      | Fltn Myhn  |
| chr13 | 21454752 | 21455025 | intron (NM  | CpG         | 199    | NM_01668  | 22758  | Zscan12   | 2510038J0  |
| chr1  | 1.83E+08 | 1.83E+08 | Intergenic  | Intergenic  | -1167  | NM_00821  | 15078  | H3f3a     | H3.3A      |
| chr4  | 98680577 | 98680675 | intron (NM  | intron (NM  | -17020 | NM_01391  | 30924  | Angptl3   | hypl       |
| chr9  | 14010102 | 14010175 | Intergenic  | Intergenic  | -70607 | NM_03026  | 75747  | Sesn3     | 5630400E1  |
| chr3  | 1.03E+08 | 1.03E+08 | promoter-1  | promoter-1  | -12    | NM_02567  | 66641  | Sike1     | 2810005O1  |
| chr17 | 28464752 | 28466550 | intron (NM  | CpG         | 235    | NM_01128  | 19896  | Rpl10a    | CsA-19 Ne  |
| chr11 | 67372927 | 67373200 | intron (NM  | intron (NM  | 26563  | NM_00808  | 14457  | Gas7      | AW124766   |
| chr15 | 75739527 | 75739700 | promoter-1  | promoter-1  | 161    | NM_00128  | 66656  | Eef1d     | EF-1-delta |
| chr7  | 1.23E+08 | 1.23E+08 | intron (NM  | intron (NM  | 1566   | NM_00127  | 20679  | Sox6      | AI987981 ! |
| chr5  | 1.38E+08 | 1.38E+08 | TTS (NM_0   | TTS (NM_0   | 316    | NM_02735  | 70240  | Ufsp1     | 2700038NC  |
| chr15 | 8344402  | 8344625  | intron (NM  | intron (NM  | 49950  | NM_02770  | 71175  | Nipbl     | Idn3       |
| chr4  | 34436727 | 34436825 | Intergenic  | L1_Rod LIN  | -61088 | NM_00100  | 433693 | Akirin2   | 2700059D2  |
| chr10 | 1.21E+08 | 1.21E+08 | intron (NM  | intron (NM  | 1321   | NM_00108  | 73192  | Xpot      | 1110004L0  |
| chr8  | 1.14E+08 | 1.14E+08 | promoter-1  | promoter-1  | -161   | NM_00914  | 20340  | Glg1      | AI593353 , |
| chr1  | 1.83E+08 | 1.83E+08 | intron (NM  | intron (NM  | 2339   | NM_14479  | 208795 | Tmem63a   | BC014795   |
| chr1  | 1.79E+08 | 1.79E+08 | intron (NM  | MTC LTR I   | 153460 | NM_01178  | 23797  | Akt3      | AI851531 I |
| chr7  | 1.46E+08 | 1.46E+08 | Intergenic  | ORR1D2 L'   | 141912 | NM_00104  | 69546  | Mapk1ip1  | 2310009E0  |
| chr6  | 1.31E+08 | 1.31E+08 | Intergenic  | RMER16-in   | 42817  | NM_00117  | 16633  | Klra2     | Klra30 Ly4 |
| chr10 | 51317052 | 51317325 | Intergenic  | Intergenic  | -6922  | NM_02989  | 77296  | Fam162b   | 9430073NC  |
| chr11 | 4491777  | 4492150  | intron (NM  | intron (NM  | 2855   | NM_02886  | 74302  | Mtmr3     | 1700092A2  |
| chr7  | 1.19E+08 | 1.19E+08 | intron (NM  | intron (NM  | 32531  | NM_17724  | 74996  | Usp47     | 4930502NC  |
| chr11 | 69495202 | 69495375 | TTS (NM_0   | TTS (NM_0   | 184    | NM_03070  | 80886  | Senp3     | AA408656   |
| chr1  | 1.8E+08  | 1.8E+08  | intron (NM  | intron (NM  | 677    | NM_00742  | 11566  | Adss      | AI314886 , |
| chr3  | 83844227 | 83844375 | promoter-1  | promoter-1  | -218   | NM_17268  | 229473 | D930015EC | Kiaa0922 r |
| chr13 | 32304127 | 32304300 | intron (NM  | intron (NM  | 126200 | NM_14604  | 218138 | Gmds      | BC031788   |
| chr9  | 50260002 | 50260200 | Intergenic  | Intergenic  | -42529 | NM_02963  | 76509  | Plet1     | 0610037B2  |
| chr8  | 1.12E+08 | 1.12E+08 | Intergenic  | Intergenic  | -6641  | NM_01737  | 15439  | Hp        | HP-1 preH  |
| chr13 | 46822627 | 46822700 | intron (NM  | CpG         | 555    | NM_17574  | 218210 | Nup153    | B130015D1  |
| chr11 | 95926252 | 95926425 | exon (NM_   | exon (NM_   | 340    | NM_17230  | 268470 | Ube2z     | AW049199   |
| chr7  | 88138052 | 88138350 | promoter-1  | promoter-1  | -369   | NM_17870  | 233410 | Zfp592    | 8430405N2  |
| chr17 | 26275177 | 26275375 | promoter-1  | promoter-1  | -355   | NM_00973  | 12005  | Axin1     | AI316800 , |
| chr1  | 1.41E+08 | 1.41E+08 | promoter-1  | promoter-1  | -60    | NM_00116  | 329260 | Dennd1b   | 4632404N1  |
| chr3  | 93316552 | 93316950 | Intergenic  | Intergenic  | -7667  | NM_01674  | 20195  | S100a11   | EMAPI Em   |
| chr5  | 1.23E+08 | 1.23E+08 | intron (NM  | CpG         | 519    | NM_17724  | 320717 | Pptc7     | 9130017A1  |
| chr15 | 77630827 | 77630900 | intron (NM  | intron (NM  | 41742  | NM_02241  | 17886  | Myh9      | Fltn Myhn  |
| chr5  | 64203377 | 64203450 | promoter-1  | promoter-1  | -321   | NM_02955  | 76261  | 0610040J0 | AI662686   |
| chr18 | 66618627 | 66618850 | intron (NM  | intron (NM  | 480    | NM_02145  | 58801  | Pmaip1    | Noxa       |
| chr1  | 1.73E+08 | 1.73E+08 | intron (NM  | intron (NM  | 1592   | NM_01018  | 14127  | Fcer1g    | AI573376 I |
| chr5  | 1.35E+08 | 1.35E+08 | intron (NR_ | intron (NR_ | 1200   | NR_033794 | 68758  | Abhd11    | 1110054D1  |
| chr12 | 8439602  | 8440075  | Intergenic  | L1MB4 LIN   | 66953  | NM_00748  | 11852  | Rhob      | AA017882   |
| chr6  | 71443902 | 71444275 | 5' UTR (NV  | 5' UTR (NV  | 200    | NM_00954  | 22644  | Rnf103    | AW146237   |
| chr8  | 11012202 | 11012375 | intron (NR_ | intron (NR_ | -3858  | NM_00108  | 384783 | Irs2      | Irs-2      |

|       |          |          |                       |            |          |          |          |            |            |
|-------|----------|----------|-----------------------|------------|----------|----------|----------|------------|------------|
| chr9  | 45714277 | 45714425 | promoter-1promoter-1  | -301       | NM_00879 | 18554    | Pcsk7    | AA959856   |            |
| chr1  | 1.29E+08 | 1.29E+08 | promoter-1promoter-1  | -104       | NM_17695 | 210356   | Nckap5   | 8430408F2  |            |
| chr9  | 71010377 | 71010600 | promoter-1promoter-1  | -48        | NM_00127 | 64008    | Aqp9     | 1700020I2: |            |
| chr16 | 10545127 | 10545325 | promoter-1promoter-1  | -206       | NM_17756 | 74374    | Clec16a  | 4932416N1  |            |
| chr13 | 56284977 | 56285150 | Intergenic            | ORR1E LTF  | -4817    | NM_00116 | 212937   | Tifab      | -          |
| chr16 | 44173452 | 44173525 | promoter-1promoter-1  | -22        | NM_00102 | 207806   | Gm608    | 5530400K2  |            |
| chr4  | 1.36E+08 | 1.36E+08 | intron (NM MTC LTR I  | 36212      | NM_02445 | 269593   | Luzp1    | 2700072HC  |            |
| chr3  | 58312127 | 58312700 | Intergenic            | L1M4 LINE  | -17330   | NM_00100 | 229317   | Eif2a      | D030048D:  |
| chr6  | 1.22E+08 | 1.22E+08 | Intergenic            | URR1A DN   | 50797    | NM_02766 | 108653   | Rimklb     | 4931417E2  |
| chr7  | 1.27E+08 | 1.27E+08 | promoter-1promoter-1  | 86         | NM_14558 | 233802   | Thumpd1  | 6330575P1  |            |
| chr5  | 38651627 | 38651750 | promoter-1promoter-1  | 74         | NM_02548 | 66309    | Tmem128  | 2810021O1  |            |
| chr6  | 47781827 | 47781950 | Intergenic            | RLTR19B L  | -1384    | NM_17788 | 330301   | Zfp786     | A730012O:  |
| chr6  | 1.29E+08 | 1.29E+08 | intron (NM Lx5 LINE L | 6626       | NM_17768 | 232413   | Clec12a  | CLL-1 D23( |            |
| chr16 | 75786527 | 75786675 | Intergenic            | Intergenic | -19538   | NM_03020 | 110920   | Hspa13     | 16000021I( |
| chr11 | 1.04E+08 | 1.04E+08 | intron (NM intron (NM | 54767      | NM_00108 | 76719    | Kansl1   | 1700081L1  |            |
| chr19 | 57511102 | 57511175 | Intergenic            | Intergenic | -16258   | NM_02983 | 72133    | Trub1      | 2610009I0: |
| chr15 | 81642002 | 81642075 | exon (NM_ exon (NM_   | 194        | NM_01737 | 21685    | Tef      | 2310028D2  |            |
| chr3  | 88521327 | 88521475 | intron (NM intron (NM | 625        | NM_00116 | 19769    | Rit1     | RIBB ROC1  |            |
| chr1  | 1.35E+08 | 1.35E+08 | Intergenic            | Intergenic | -8863    | NM_00857 | 17248    | Mdm4       | 4933417NC  |
| chr19 | 43749002 | 43749275 | promoter-1promoter-1  | 233        | NM_14515 | 246696   | Slc25a28 | 2210403D1  |            |
| chr17 | 24343177 | 24343300 | promoter-1promoter-1  | -731       | NM_00116 | 224617   | Tbc1d24  | 9630033P1  |            |
| chr2  | 1.28E+08 | 1.28E+08 | promoter-1promoter-1  | -76        | NM_02876 | 74121    | Acox1    | 1200014PC  |            |
| chr1  | 1.41E+08 | 1.41E+08 | intron (NM MusHAL1    | 74390      | NM_13323 | 170788   | Crb1     | 7530426H1  |            |
| chr3  | 60266227 | 60266400 | Intergenic            | Intergenic | -10439   | NM_00125 | 56758    | Mbnl1      | Mbnl mKI/  |
| chr7  | 52926152 | 52926575 | Intergenic            | RLTR22_M   | -4599    | NM_00127 | 14344    | Fut2       | -          |
| chr3  | 1.06E+08 | 1.06E+08 | Intergenic            | L1Md_F2 I  | -5131    | NM_00989 | 12655    | Chil3      | AI505981 I |
| chr2  | 22923677 | 22924075 | promoter-1promoter-1  | 155        | NM_00110 | 74159    | Acbd5    | 1300014E1  |            |
| chr5  | 8062402  | 8062675  | intron (NM intron (NM | 5996       | NM_00108 | 109552   | Sri      | 2210417OC  |            |
| chr15 | 79377252 | 79377525 | promoter-1promoter-1  | -217       | NM_19908 | 67040    | Ddx17    | 2610007K2  |            |
| chr14 | 58331777 | 58331975 | intron (NM intron (NM | 21379      | NM_15338 | 50523    | Lats2    | 4932411GC  |            |
| chr18 | 60686552 | 60686700 | intron (NM intron (NM | 751        | NM_02630 | 67665    | Dctn4    | 1110001KC  |            |
| chr5  | 1.43E+08 | 1.43E+08 | intron (NM intron (NM | 18993      | NM_17521 | 75104    | Mmd2     | 4930518M   |            |
| chr6  | 1.21E+08 | 1.21E+08 | intron (NML1MB8 LIN   | 4215       | NM_15351 | 94044    | Bcl2l13  | BCL-RAMB(  |            |
| chr2  | 69243777 | 69244175 | Intergenic            | Intergenic | 25457    | NM_17551 | 241452   | Dhrs9      | C730025I0: |
| chr1  | 1.59E+08 | 1.59E+08 | intron (NM intron (NM | 8053       | NM_14541 | 215015   | Fam20b   | C530043G2  |            |
| chr15 | 25760252 | 25760425 | Intergenic            | Intergenic | -12715   | NM_00103 | 66270    | Fam134b    | 1810015CC  |
| chr9  | 30837302 | 30837375 | promoter-1promoter-1  | -891       | NM_00111 | 235132   | Zbtb44   | 6030404E1  |            |
| chr13 | 64254202 | 64254475 | 5' UTR (NV 5' UTR (NV | 169        | NM_17549 | 238673   | Zfp367   | 8030486J2  |            |
| chr2  | 18919577 | 18919800 | promoter-1promoter-1  | 60         | NM_00884 | 18718    | Pip4k2a  | AW742916   |            |
| chr1  | 94808027 | 94808250 | intron (NM intron (NM | 736        | NM_18140 | 108657   | Rnpepl1  | 1110014H1  |            |
| chr16 | 33829377 | 33829550 | promoter-1promoter-1  | -288       | NM_01058 | 16419    | Itgb5    | AA475909   |            |
| chr7  | 1.08E+08 | 1.08E+08 | intron (NM intron (NM | -8653      | NM_01167 | 22228    | Ucp2     | Slc25a8    |            |
| chr3  | 9879602  | 9879800  | Intergenic            | Intergenic | -46022   | NM_00119 | 94212    | Pag1       | Cbp F7300  |
| chr3  | 60311927 | 60312200 | intron (NM MIR SINE   | 6889       | NM_00125 | 56758    | Mbnl1    | Mbnl mKI/  |            |
| chr2  | 38367552 | 38367700 | intron (NM CpG        | 230        | NM_00115 | 59126    | Nek6     | 1300007CC  |            |
| chr17 | 45879427 | 45879600 | Intergenic            | L1MB3 LIN  | -8720    | NM_02816 | 72240    | 1600014C2- |            |
| chr4  | 1.32E+08 | 1.32E+08 | Intergenic            | B1F SINE , | -12502   | NM_02603 | 67219    | Med18      | 2810046CC  |

|       |          |          |             |             |        |          |        |            |            |
|-------|----------|----------|-------------|-------------|--------|----------|--------|------------|------------|
| chr1  | 1.83E+08 | 1.83E+08 | Intergenic  | Intergenic  | -41983 | NM_02840 | 72978  | Cnih3      | 2900075GC  |
| chr6  | 1.16E+08 | 1.16E+08 | intron (NM  | intron (NM  | 23672  | NM_02637 | 67784  | Plxnd1     | 6230425C2  |
| chr16 | 64852002 | 64852225 | intron (NM  | CpG         | 202    | NM_17864 | 106143 | Cggbp1     | AA960172   |
| chr19 | 3880502  | 3880625  | intron (NR_ | intron (NR_ | 24667  | NM_01692 | 27060  | Tcirg1     | ATP6N1C /  |
| chr3  | 78965102 | 78965300 | Intergenic  | Intergenic  | -15404 | NM_00109 | 76089  | Rapgef2    | 5830453M   |
| chr18 | 50068727 | 50068850 | intron (NM  | intron (NM  | -70293 | NM_00117 | 106869 | Tnfaip8    | AA987150   |
| chr15 | 58586577 | 58586850 | Intergenic  | MER91C D    | 68269  | NM_17521 | 74868  | Tmem65     | 261002901  |
| chr13 | 48965327 | 48965500 | intron (NM  | intron (NM  | 841    | NM_01107 | 18676  | Phf2       | GRC5       |
| chr3  | 1.17E+08 | 1.17E+08 | intron (NM  | intron (NM  | 966    | NM_00111 | 20321  | Frrs1      | AI131732 ! |
| chr1  | 1.83E+08 | 1.83E+08 | Intergenic  | Intergenic  | -39469 | NM_20728 | 403180 | Ccdc121    | 6530421E2  |
| chr4  | 1.35E+08 | 1.35E+08 | intron (NM  | intron (NM  | 1023   | NM_02638 | 52830  | Pnrc2      | 0610011E1  |
| chr9  | 96792502 | 96792750 | Intergenic  | Intergenic  | -2733  | NM_00128 | 235534 | Pxylp1     | 9430094M   |
| chr2  | 1.65E+08 | 1.65E+08 | Intergenic  | Intergenic  | -5194  | NM_00101 | 408190 | Wfdc13     | Wfdc13l1   |
| chr15 | 77685727 | 77686125 | Intergenic  | Intergenic  | -13321 | NM_02241 | 17886  | Myh9       | Fltn Myhn- |
| chr2  | 1.56E+08 | 1.56E+08 | intron (NM  | MIRb SINE   | -11373 | NM_02025 | 19018  | Scand1     | 2310003H2  |
| chr1  | 1.3E+08  | 1.3E+08  | Intergenic  | Intergenic  | -21370 | NM_14550 | 226414 | Dars       | 5730439G1  |
| chr8  | 83263877 | 83264025 | promoter-1  | promoter-1  | -593   | NM_05312 | 93762  | Smarca5    | 4933427E2  |
| chr3  | 35832602 | 35832925 | promoter-1  | promoter-1  | -875   | NM_00120 | 114893 | Dcun1d1    | Rp42 SCCR  |
| chr4  | 1.32E+08 | 1.32E+08 | promoter-1  | promoter-1  | -715   | NM_20136 | 381560 | Xkr8       | 4931440NC  |
| chr9  | 45793352 | 45793525 | promoter-1  | promoter-1  | -484   | NM_00877 | 18475  | Pafah1b2   | AI747451 , |
| chr14 | 57504977 | 57505100 | Intergenic  | CpG         | -1594  | NM_02949 | 76007  | Zmym2      | 5830413PC  |
| chr13 | 90228652 | 90228825 | promoter-1  | promoter-1  | 475    | NM_02801 | 108138 | Xrcc4      | 2310057B2  |
| chr2  | 60122202 | 60122425 | 5' UTR (NV  | 5' UTR (NV  | 228    | NM_02542 | 66205  | Cd302      | 1110055L2  |
| chr7  | 1.17E+08 | 1.17E+08 | intron (NM  | intron (NM  | 92121  | NM_00930 | 20947  | Swap70     | 70kDa AV2  |
| chr4  | 1.51E+08 | 1.51E+08 | intron (NM  | CpG         | 234    | NM_17270 | 230935 | Dnajc11    | E030019AC  |
| chr15 | 51709052 | 51709175 | exon (NM_   | exon (NM_   | 126    | NM_03013 | 78581  | Utp23      | 1700010I2: |
| chr4  | 1.25E+08 | 1.25E+08 | intron (NM  | intron (NM  | 3137   | NM_15315 | 230738 | Zc3h12a    | BC036563   |
| chrX  | 13428477 | 13428725 | Intergenic  | Intergenic  | -4919  | NM_00980 | 12361  | Cask       | DXPri1 DXI |
| chr4  | 91038352 | 91038475 | intron (NM  | CpG         | 333    | NM_01048 | 15569  | Elavl2     | Hub mel-N  |
| chr5  | 54328477 | 54328750 | Intergenic  | MLT1H2 L'   | -61149 | NM_00108 | 116873 | Stim2      | -          |
| chr6  | 1.35E+08 | 1.35E+08 | promoter-1  | promoter-1  | 230    | NM_00116 | 14760  | Gpr19      | -          |
| chr2  | 1.55E+08 | 1.55E+08 | intron (NM  | MER58B D    | 22143  | NM_00124 | 56406  | Ncoa6      | AIB3 ASC-2 |
| chr17 | 27760077 | 27760175 | promoter-1  | promoter-1  | -217   | NM_00129 | 56409  | Nudt3      | 1110011BC  |
| chr16 | 20426252 | 20426450 | 5' UTR (NV  | 5' UTR (NV  | 116    | NM_01379 | 27416  | Abcc5      | 2900011L1  |
| chr15 | 1E+08    | 1E+08    | intron (NM  | intron (NM  | 16763  | NM_03347 | 21422  | Tfcp2      | CP-2 CP2 I |
| chr1  | 1.62E+08 | 1.62E+08 | intron (NM  | intron (NM  | 572    | NM_02547 | 64659  | Mrps14     | 1810032L2  |
| chr2  | 1.8E+08  | 1.8E+08  | intron (NM  | intron (NM  | 7443   | NM_14893 | 108115 | Slco4a1    | OATP-E Slc |
| chr12 | 78453452 | 78453575 | intron (NR_ | intron (NR_ | -36338 | NM_00125 | 53618  | Fut8       | -          |
| chr5  | 34679202 | 34679450 | intron (NM  | CpG         | 287    | NM_01127 | 19822  | Rnf4       | AU018689   |
| chr13 | 49723677 | 49723800 | intron (NM  | intron (NM  | 20298  | NM_00876 | 18295  | Ogn        | 3110079A1  |
| chr11 | 72812227 | 72812350 | promoter-1  | promoter-1  | -359   | NM_00877 | 18436  | P2rx1      | AI323649 I |
| chr13 | 97753477 | 97753550 | Intergenic  | Intergenic  | 50804  | NM_02558 | 66479  | 1700029F1- |            |
| chr17 | 17762327 | 17762600 | Intergenic  | CpG-6002    | -1010  | NM_17282 | 240028 | Lnpep      | 2010309L0  |
| chr14 | 21661877 | 21662250 | 3' UTR (NV  | 3' UTR (NV  | 6179   | NM_00887 | 18792  | Plau       | u-PA uPA   |
| chr12 | 27145102 | 27145300 | Intergenic  | Intergenic  | -3884  | NM_02138 | 58185  | Rsad2      | 2510004L0  |
| chr8  | 1.26E+08 | 1.26E+08 | Intergenic  | Intergenic  | 11609  | NM_13395 | 69581  | Rhou       | 2310026M   |
| chr10 | 18729277 | 18729350 | intron (NM  | intron (NM  | 2456   | NM_00116 | 21929  | Tnfaip3    | A20 Tnfip3 |

|       |          |          |                       |         |           |        |          |             |
|-------|----------|----------|-----------------------|---------|-----------|--------|----------|-------------|
| chr11 | 54673327 | 54673425 | intron (NM B1F SINE L | 717     | NM_02932  | 75530  | Lym7     | 1700024C2   |
| chr4  | 15885227 | 15885350 | intron (NM CpG        | 174     | NM_01375  | 27354  | Nbn      | Nbs1        |
| chr17 | 47131902 | 47132250 | intron (NM intron (NM | 15405   | NM_14607  | 224826 | Ubr2     | 9930021AC   |
| chr3  | 51212702 | 51212800 | intron (NM CpG        | 126     | NM_02552  | 66377  | Ndufc1   | 2310016K2   |
| chr1  | 1.34E+08 | 1.34E+08 | intron (NM intron (NM | 11258   | NM_17251  | 213452 | Dstyk    | A930019K2   |
| chr8  | 87823977 | 87824050 | promoter-1promoter-1  | 482     | NR_028268 | 56452  | Orc6     | 672042010   |
| chr9  | 1.07E+08 | 1.07E+08 | intron (NM CpG        | 130     | NM_13398  | 69536  | Hemk1    | 2310008M    |
| chr2  | 1.1E+08  | 1.1E+08  | promoter-1promoter-1  | -222    | NM_01169  | 22343  | Lin7c    | 9130007B1   |
| chr13 | 84332352 | 84332550 | Intergenic Lx8 LINE L | -29450  | NR_029418 | 72745  | Tmem161k | 2810446PC   |
| chr12 | 86159302 | 86159625 | intron (NM intron (NM | 45243   | NM_02886  | 74316  | Isca2    | 0710001CC   |
| chr2  | 32248627 | 32248775 | Intergenic Intergenic | -2709   | NM_13378  | 96979  | Ptges2   | 0610038H1   |
| chr15 | 78758727 | 78758800 | intron (NM G-rich Low | 1608    | NM_00849  | 16852  | Lgals1   | AA410090    |
| chr13 | 1.13E+08 | 1.13E+08 | Intergenic PB1D9 SIN  | -3860   | NM_01194  | 26401  | Map3k1   | MAPKKK1     |
| chr10 | 19246177 | 19246450 | Intergenic Intergenic | -65451  | NM_01051  | 15979  | Ifngr1   | CD119 IFN   |
| chr6  | 30536827 | 30537225 | intron (NM intron (NM | 18650   | NM_02792  | 71791  | Cpa4     | 1110019K2   |
| chr16 | 32878077 | 32878250 | intron (NM CpG        | 293     | NM_00115  | 69823  | Fyttd1   | 2010005M    |
| chr16 | 16303302 | 16303450 | non-coding non-coding | 318     | NM_19824  | 70120  | Yars2    | 2210023C1   |
| chr17 | 21626102 | 21626200 | 5' UTR (NM 5' UTR (NM | 199     | NM_01384  | 24132  | Zfp53    | D03006700   |
| chr5  | 1.4E+08  | 1.4E+08  | promoter-1promoter-1  | -56     | NM_19798  | 68033  | Cox19    | 1810074DC   |
| chr6  | 70741752 | 70742400 | promoter-1promoter-1  | 93      | NM_00907  | 19895  | Rpia     | RPI         |
| chr17 | 25252602 | 25252850 | 5' UTR (NM 5' UTR (NM | 124     | NM_02788  | 71718  | Telo2    | 1200003M    |
| chr14 | 1.04E+08 | 1.04E+08 | intron (NM MER20 DN   | 18255   | NM_02288  | 64929  | Scel     | 923011410   |
| chr16 | 22202052 | 22202150 | Intergenic Intergenic | -38729  | NM_18302  | 319765 | Igf2bp2  | C330012HC   |
| chr3  | 68930277 | 68930375 | intron (NM CpG        | 688     | NM_00846  | 16649  | Kpna4    | 1110058DC   |
| chr10 | 37335777 | 37336000 | Intergenic Intergenic | -477156 | NM_00853  | 17118  | Marcks   | Macs PKCS   |
| chr13 | 76192777 | 76192850 | 3' UTR (NM 3' UTR (NM | 1631    | NM_17549  | 238725 | Gpr150   | C030001A1   |
| chr2  | 71711627 | 71711775 | intron (NM CpG        | 420     | NM_17266  | 228026 | Pdk1     | B830012BC   |
| chr3  | 90499527 | 90499950 | promoter-1promoter-1  | -95     | NM_00911  | 20202  | S100a9   | 60B8Ag AV   |
| chr4  | 1.1E+08  | 1.1E+08  | Intergenic MLT1H1 L   | 9808    | NM_17229  | 242620 | Dmrta2   | Dmrt5       |
| chr4  | 1.06E+08 | 1.06E+08 | Intergenic ORR1C1 L1  | -1902   | NM_02559  | 329910 | Acot11   | 1110020M    |
| chr6  | 18552027 | 18552100 | Intergenic Intergenic | -87238  | NM_08028  | 30785  | Cttnbp2  | 3010022N2   |
| chr6  | 1.47E+08 | 1.47E+08 | Intergenic Intergenic | -46706  | NM_00897  | 19227  | Pthlh    | PTH-like PI |
| chr7  | 1.51E+08 | 1.51E+08 | promoter-1promoter-1  | 54      | NM_00785  | 13360  | Dhcr7    | AA409147    |
| chr7  | 1.07E+08 | 1.07E+08 | 5' UTR (NM 5' UTR (NM | 529     | NM_20135  | 233552 | Gdpd5    | BC024955    |
| chr18 | 35278452 | 35278675 | promoter-1promoter-1  | -3      | NM_00981  | 12385  | Ctnna1   | 2010010M    |
| chr11 | 51670102 | 51670225 | intron (NM CpG        | 820     | NM_19929  | 76901  | Jade2    | 1200017KC   |
| chr2  | 90420127 | 90420350 | intron (NM CpG        | 566     | NM_00898  | 19271  | Ptprj    | AI450271 I  |
| chr17 | 74299502 | 74299650 | promoter-1promoter-1  | -40     | NM_01172  | 22436  | Xdh      | XO Xor Xo   |
| chr2  | 29904602 | 29904900 | promoter-1promoter-1  | -352    | NM_00100  | 71820  | Wdr34    | 3200002100  |
| chr1  | 95651402 | 95651725 | promoter-1promoter-1  | -47     | NM_17487  | 66615  | Atg4b    | 2510009NC   |
| chr18 | 73732927 | 73733100 | exon (NM_ exon (NM_   | 654     | NM_00103  | 240396 | Mex3c    | A130001D0   |
| chr5  | 1.22E+08 | 1.22E+08 | Intergenic Intergenic | 67893   | NM_00110  | 19247  | Ptpn11   | 2700084A1   |
| chr5  | 20694827 | 20695000 | intron (NM intron (NM | 2828    | NM_17543  | 212167 | Gsap     | A53008810   |
| chr12 | 1.02E+08 | 1.02E+08 | intron (NM intron (NM | -14193  | NM_00117  | 238377 | Gpr68    | BB131428    |
| chr12 | 56100227 | 56100350 | Intergenic MLT1J2 LT  | -12965  | NM_01381  | 217578 | Baz1a    | Acf1 B9300  |
| chr3  | 19415602 | 19415800 | intron (NM intron (NM | 7106    | NM_02548  | 66326  | Dnajc5b  | 1700008AC   |
| chr17 | 25929177 | 25929350 | promoter-1promoter-1  | 69      | NM_00128  | 214917 | Fam173a  | -           |

|       |          |          |                       |          |          |        |           |             |
|-------|----------|----------|-----------------------|----------|----------|--------|-----------|-------------|
| chr13 | 24498852 | 24499000 | intron (NM MER21-int  | -8065    | NM_00771 | 12763  | Cmah      | -           |
| chr2  | 52601377 | 52601750 | promoter-1promoter-1  | -380     | NM_01966 | 56324  | Stam2     | 120000401   |
| chr9  | 1E+08    | 1E+08    | intron (NM CpG        | 584      | NM_01087 | 17973  | Nck1      | 6330586M    |
| chr1  | 95721852 | 95722025 | intron (NM intron (NM | 121      | NM_17888 | 98314  | D2hgdh    | AA408776    |
| chr11 | 29147252 | 29147400 | promoter-1promoter-1  | -54      | NM_02574 | 216618 | Ccdc104   | 2300003H1   |
| chr4  | 1.38E+08 | 1.38E+08 | promoter-1promoter-1  | -763     | NM_00109 | 230863 | Sh2d5     | BC036961    |
| chr1  | 1.56E+08 | 1.56E+08 | intron (NM intron (NM | 3132     | NM_01188 | 24014  | Rnasel    | E230029104  |
| chr1  | 34529502 | 34529775 | exon (NM_ exon (NM_   | 13047    | NM_01120 | 19253  | Ptpn18    | FLP1 HSCF   |
| chrX  | 74661052 | 74661175 | Intergenic ID4 SINE I | -95453   | NM_02060 | 21372  | Tbl1x     | 5330429M    |
| chr15 | 96588077 | 96588300 | Intergenic Intergenic | -58059   | NM_17512 | 67760  | Slc38a2   | 5033402L1   |
| chr8  | 28153152 | 28153250 | intron (NM CpG        | 174      | NM_05405 | 114863 | Prosc     | 1700024N2   |
| chr5  | 46072177 | 46072250 | intron (NM MTEa LTR   | 11049    | NM_01943 | 54392  | Ncapg     | 5730507HC   |
| chr7  | 1.06E+08 | 1.06E+08 | Intergenic Intergenic | -5159    | NM_17863 | 78610  | Uvrag     | 9530039DC   |
| chr17 | 24005452 | 24005875 | exon (NM_ exon (NM_   | 624      | NM_02048 | 57256  | Prss21    | 1700023E1   |
| chr8  | 81331402 | 81331525 | 3' UTR (NV 3' UTR (NV | 13588    | NM_00119 | 78651  | Lsm6      | 1500031N1   |
| chr15 | 36264927 | 36265200 | Intergenic Intergenic | -52161   | NM_01392 | 30945  | Rnf19a    | AA032313    |
| chr19 | 5366927  | 5367100  | promoter-1promoter-1  | -137     | NM_01179 | 23825  | Banf1     | Baf Bcrp1   |
| chr16 | 18082427 | 18082525 | intron (NM intron (NM | 6807     | NM_01117 | 19125  | Prodh     | Pro-1 Pro1  |
| chr11 | 22193952 | 22194150 | Intergenic Intergenic | -7253    | NM_00125 | 216565 | Ehbp1     | AF424697    |
| chrX  | 1.01E+08 | 1.01E+08 | intron (NM CpG        | 522      | NM_01127 | 19820  | Rlim      | AL022832    |
| chr1  | 38160202 | 38160475 | intron (NM intron (NM | 26169    | NM_01957 | 56210  | Rev1      | 111002712:  |
| chr17 | 5206777  | 5207050  | intron (NM intron (NM | 211839   | NM_00108 | 239985 | Arid1b    | 8030481M    |
| chr1  | 94965002 | 94965075 | intron (NM intron (NM | 14019    | NM_00129 | 16560  | Kif1a     | ATSV C63C   |
| chr4  | 1.5E+08  | 1.5E+08  | intron (NM CpG        | 90051    | NM_00108 | 68703  | Rere      | 1110033A1   |
| chr6  | 48504677 | 48504850 | promoter-1promoter-1  | -35      | NM_00111 | 243371 | Lrrc61    | BC027309    |
| chr17 | 35095927 | 35096175 | 5' UTR (NV 5' UTR (NV | 132      | NM_01047 | 15511  | Hspa1b    | Hsp70 Hsp   |
| chr13 | 96611952 | 96612025 | intron (NM intron (NM | 49889    | NM_02771 | 544963 | Iqgap2    | 4933417J2   |
| chr5  | 80395427 | 80395500 | Intergenic Intergenic | -1055155 | NM_19870 | 319387 | Lphn3     | 543040212:  |
| chr1  | 1.01E+08 | 1.01E+08 | Intergenic Intergenic | 312575   | NM_02758 | 70866  | Slco6d1   | 492151110!  |
| chr5  | 77403627 | 77403975 | promoter-1promoter-1  | 75       | NM_02569 | 66661  | Srp72     | 5730576P1   |
| chr6  | 1.21E+08 | 1.21E+08 | Intergenic Intergenic | 16825    | NM_01737 | 53857  | Tuba8     | -           |
| chr15 | 78860852 | 78861050 | promoter-1promoter-1  | -353     | NM_01384 | 26912  | Gcat      | AI526977    |
| chr1  | 1.63E+08 | 1.63E+08 | Intergenic Intergenic | -17666   | NM_00745 | 11758  | Prdx6     | 1-cysPrx 9. |
| chr1  | 72301952 | 72302250 | Intergenic Intergenic | 28787    | NM_02352 | 111175 | Pecr      | 2400003B1   |
| chr3  | 41369427 | 41369575 | intron (NM CpG        | 699      | NM_00113 | 269424 | Jade1     | AU041499    |
| chr6  | 51419027 | 51419400 | intron (NM CpG        | 680      | NM_18265 | 53379  | Hnrnpa2b1 | 9130414AC   |
| chr7  | 1.33E+08 | 1.33E+08 | Intergenic Intergenic | -6242    | NM_02188 | 60504  | Il21r     | NILR        |
| chr10 | 85514652 | 85514925 | 3' UTR (NV 3' UTR (NV | 30114    | NM_15319 | 69754  | Fbxo7     | 2410015K2   |
| chr19 | 5560102  | 5560175  | intron (NM CpG        | 437      | NM_01993 | 18426  | Ovol1     | BB147136    |
| chr16 | 32396102 | 32396175 | Intergenic Intergenic | -4454    | NM_00116 | 277203 | Tm4sf19   | EG277203    |
| chr5  | 1.45E+08 | 1.45E+08 | promoter-1promoter-1  | -91      | NM_17768 | 231874 | Ccz1      | AU022870    |
| chr8  | 1.09E+08 | 1.09E+08 | promoter-1promoter-1  | -450     | NM_02149 | 58994  | Smpd3     | 4631433GC   |
| chr7  | 87377177 | 87377375 | promoter-1promoter-1  | 415      | NM_00129 | 23991  | Cib1      | Cibkip Kip  |
| chr8  | 87550927 | 87551100 | exon (NM_ exon (NM_   | 281      | NM_02676 | 68544  | 2310036O2 | 1110002H1   |
| chr1  | 34541602 | 34541800 | Intergenic Intergenic | -13574   | NM_00935 | 21755  | Prss39    | Tesp1       |
| chr6  | 1.21E+08 | 1.21E+08 | intron (NM CpG        | 152      | NM_00751 | 11973  | Atp6v1e1  | 2410029D2   |
| chr16 | 36935502 | 36935575 | intron (NM intron (NM | 469      | NM_00822 | 15163  | Hcls1     | AW213261    |



|       |          |          |            |            |         |          |        |           |           |
|-------|----------|----------|------------|------------|---------|----------|--------|-----------|-----------|
| chr8  | 41824652 | 41824875 | Intergenic | ETnERV3-ir | -12799  | NM_01178 | 23793  | Adam25    | -         |
| chr14 | 21460227 | 21460450 | Intergenic | CpG        | 15424   | NM_02150 | 59011  | Myoz1     | 2310001N1 |
| chr11 | 1.01E+08 | 1.01E+08 | intron (NM | intron (NM | 1015    | NM_00116 | 20850  | Stat5a    | AA959963  |
| chr7  | 1.4E+08  | 1.4E+08  | intron (NM | intron (NM | 7453    | NM_00998 | 13017  | Ctbp2     | AA407280  |
| chr11 | 90044177 | 90044475 | Intergenic | Intergenic | -66464  | NM_02617 | 67468  | Mmd       | 1200017E0 |
| chr15 | 81354127 | 81354350 | Intergenic | Intergenic | 57492   | NM_01971 | 56438  | Rbx1      | 1500002P1 |
| chr14 | 32977727 | 32977900 | promoter-1 | promoter-1 | -959    | NM_00128 | 27057  | Ncoa4     | ARA70 Rfg |
| chr3  | 94690677 | 94690950 | promoter-1 | promoter-1 | 67      | NM_00894 | 19172  | Psmb4     | Pros-27   |
| chr17 | 24615827 | 24615975 | intron (NM | CpG        | 122     | NM_00125 | 56716  | Mlst8     | 0610033N1 |
| chr3  | 63780102 | 63780525 | intron (NM | CpG        | 248     | NM_00103 | 229363 | Gmps      | AA591640  |
| chr2  | 1.1E+08  | 1.1E+08  | Intergenic | MYSERV16   | -60226  | NM_02627 | 67606  | Fibin     | 1110018M  |
| chr4  | 1.33E+08 | 1.33E+08 | Intergenic | Intergenic | 12536   | NM_00114 | 230801 | Pigv      | B330013BC |
| chr14 | 47808677 | 47809025 | exon (NM_  | exon (NM_  | 226     | NM_00810 | 14528  | Gch1      | GTP-CH G1 |
| chr1  | 3436027  | 3436125  | intron (NM | RLTR45 LT  | 225503  | NM_00101 | 497097 | Xkr4      | AY534250  |
| chr14 | 45938952 | 45939025 | promoter-1 | promoter-1 | -741    | NM_01577 | 50527  | Ero1l     | ERO1-L    |
| chr2  | 11524602 | 11524775 | intron (NM | CpG        | 138     | NM_15282 | 76938  | Rbm17     | 2700027J0 |
| chrX  | 9037802  | 9037950  | intron (NM | intron (NM | 8574    | NM_00780 | 13058  | Cybb      | C88302 CC |
| chr10 | 20803477 | 20803725 | Intergenic | Intergenic | 42975   | NM_00117 | 52906  | Ahi1      | 1700015F0 |
| chr8  | 98411777 | 98411900 | intron (NM | intron (NM | 427     | NM_01032 | 14719  | Got2      | AL022787  |
| chr9  | 71980452 | 71980975 | Intergenic | CpG        | -21087  | NM_00125 | 21406  | Tcf12     | A130037EC |
| chr10 | 17196527 | 17196725 | Intergenic | ORR1E LTF  | -246408 | NM_01082 | 17684  | Cited2    | AI835299  |
| chr19 | 6389952  | 6390125  | intron (NM | intron (NM | 5609    | NM_01122 | 19309  | Pygm      | AI115133  |
| chr9  | 1.11E+08 | 1.11E+08 | intron (NM | L1MB4 LIN  | 6506    | NM_02831 | 72654  | Ccdc12    | 2700094L0 |
| chr2  | 1.02E+08 | 1.02E+08 | Intergenic | MIR SINE   | -4306   | NM_02963 | 76501  | CommD9    | 1810029F0 |
| chr4  | 1.52E+08 | 1.52E+08 | intron (NM | intron (NM | 6653    | NM_00108 | 269610 | Chd5      | 4930532L2 |
| chr11 | 88017977 | 88018075 | non-coding | non-coding | 136     | NM_00129 | 64656  | Mrps23    | D11Bwg11. |
| chr10 | 26476277 | 26476350 | Intergenic | Intergenic | -16005  | NM_17683 | 73910  | Arhgap18  | 4833419J0 |
| chr12 | 1.05E+08 | 1.05E+08 | intron (NM | intron (NM | 952     | NM_19931 | 380780 | Serpina11 | Gm895     |
| chr8  | 98011927 | 98012150 | intron (NM | intron (NM | 682     | NM_00997 | 13000  | Csnk2a2   | 1110035J2 |
| chr8  | 1.22E+08 | 1.22E+08 | intron (NM | intron (NM | 7161    | NM_02339 | 67866  | Wfdc1     | 2310058AC |
| chr1  | 1.55E+08 | 1.55E+08 | intron (NM | L2 LINE L2 | 56057   | NM_17546 | 226518 | Nmnat2    | AI843915  |
| chrX  | 39264727 | 39265025 | intron (NM | CpG        | 202     | NM_00103 | 331401 | Thoc2     | 6330441O1 |
| chr14 | 62026077 | 62026150 | intron (NM | B4A SINE   | 32671   | NM_00846 | 16648  | Kpna3     | IPOA4     |
| chr19 | 21514002 | 21514125 | intron (NM | intron (NM | 33088   | NM_01026 | 14544  | Gda       | AU015411  |
| chr3  | 1.23E+08 | 1.23E+08 | Intergenic | Intergenic | -13330  | NM_00893 | 19142  | Prss12    | Bssp-3 mo |
| chr11 | 1.16E+08 | 1.16E+08 | intron (NM | intron (NM | -4267   | NM_01572 | 11430  | Acox1     | AOX Acox  |
| chr6  | 86800152 | 86800275 | promoter-1 | promoter-1 | 702     | NM_00104 | 269774 | Aak1      | 5530400K1 |
| chr17 | 80623652 | 80623775 | promoter-1 | promoter-1 | -116    | NM_02605 | 67242  | Gemin6    | 2610019B1 |
| chr14 | 48269452 | 48269650 | intron (NM | CpG        | 565     | NM_00129 | 16709  | Ktn1      | -         |
| chr10 | 1.2E+08  | 1.2E+08  | promoter-1 | promoter-1 | -240    | NM_00108 | 380664 | Lemd3     | AI316861  |
| chr4  | 55636152 | 55636625 | Intergenic | Intergenic | -91041  | NM_01063 | 16600  | Klf4      | EZF Klf Z |
| chr17 | 79754152 | 79754275 | 5' UTR (NM | 5' UTR (NM | 218     | NM_02651 | 260409 | Cdc42ep3  | 3200001F0 |
| chr18 | 25467077 | 25467200 | intron (NM | Lx9 LINE L | 139617  | NM_00103 | 225289 | AW554918  | 4921538P2 |
| chr14 | 79699677 | 79699875 | intron (NM | intron (NM | 1666    | NM_02542 | 66214  | Rgcc      | 1190002H2 |
| chr12 | 1.12E+08 | 1.12E+08 | Intergenic | Intergenic | -3839   | NM_01197 | 26448  | Mok       | RAGE1 Rağ |
| chr1  | 64579577 | 64579825 | intron (NM | CpG        | 323     | NM_00103 | 12912  | Creb1     | 2310001E1 |
| chr17 | 51132902 | 51133100 | intron (NM | RLTR14-int | 165702  | NM_00128 | 72238  | Tbc1d5    | 1600014NC |

|       |          |          |                        |        |          |        |          |            |
|-------|----------|----------|------------------------|--------|----------|--------|----------|------------|
| chr8  | 90724102 | 90724200 | exon (NM_exon (NM_     | 1039   | NM_00116 | 214627 | Papd5    | 5730445M   |
| chr8  | 1.27E+08 | 1.27E+08 | promoter-1promoter-1   | -54    | NM_13396 | 102162 | Taf5l    | 1110005N0  |
| chr1  | 39582552 | 39583075 | Intergenic Intergenic  | -9834  | NM_02804 | 52846  | Cnot11   | 2410015L1  |
| chr6  | 1.47E+08 | 1.47E+08 | promoter-1promoter-1   | 168    | NM_02621 | 67529  | Fgfr1op2 | 1500031J0  |
| chr7  | 51846727 | 51846900 | exon (NM_exon (NM_     | 557    | NM_00129 | 16504  | Kcnc3    | KShIID Kc  |
| chr8  | 1.07E+08 | 1.07E+08 | promoter-1promoter-1   | 45     | NM_00102 | 382051 | Pdp2     | 4833426J0  |
| chr14 | 32643152 | 32643225 | intron (NM CpG         | 413    | NM_00102 | 105522 | Ankrd28  | AI465466   |
| chr6  | 34827902 | 34827975 | 5' UTR (NM 5' UTR (NV  | 127    | NM_19914 | 78412  | 3110062M | AL023049   |
| chr6  | 24560352 | 24560675 | Intergenic Intergenic  | 12742  | NM_05309 | 93677  | Lmod2    | C-Lmod     |
| chr5  | 1.48E+08 | 1.48E+08 | promoter-1promoter-1   | 93     | NM_02565 | 66596  | Gtf3a    | 2010015DC  |
| chr9  | 54998127 | 54998225 | intron (NM intron (NM  | 1000   | NM_18060 | 109161 | Ube2q2   | 3010021M   |
| chr7  | 36587752 | 36587925 | non-coding non-coding  | 170    | NM_17773 | 668501 | Zfp507   | 1810022O1  |
| chr7  | 52112402 | 52112525 | promoter-1promoter-1   | -53    | NM_02154 | 59047  | Pnkp     | 1810009GC  |
| chr18 | 46756627 | 46756750 | promoter-1promoter-1   | 501    | NM_02569 | 66676  | Tmed7    | 3930401E1  |
| chr17 | 74922627 | 74922825 | Intergenic URR1B DN    | -4909  | NM_00756 | 12211  | Birc6    | A430032GC  |
| chr4  | 59453752 | 59453950 | Intergenic B4A SINE    | -2346  | NM_00116 | 634731 | Susd1    | A530080P1  |
| chr6  | 86475877 | 86476050 | 5' UTR (NV 5' UTR (NV  | 196    | NM_01186 | 23983  | Pcbp1    | WBP17 [a]  |
| chr2  | 1.73E+08 | 1.73E+08 | Intergenic Intergenic  | 46363  | NM_00108 | 664799 | Ctcf1    | Boris OTTM |
| chr18 | 3005302  | 3005900  | Intergenic Intergenic  | 117811 | NM_00116 | 1E+08  | Vmn1r238 | -          |
| chr3  | 1.09E+08 | 1.09E+08 | intron (NM Charlie25 I | 31346  | NM_17268 | 229731 | Slc25a24 | 2610016M   |
| chr19 | 37665002 | 37665575 | intron (NM intron (NM  | 40380  | NM_17535 | 107371 | Exoc6    | 4833405E0  |
| chr15 | 91003477 | 91003575 | intron (NM intron (NM  | 18712  | NM_01199 | 26874  | Abcd2    | ABC39 ALI  |
| chr7  | 57033652 | 57033825 | promoter-1promoter-1   | 10     | NM_13374 | 71974  | Prmt3    | 2010005E2  |
| chr3  | 69908127 | 69908425 | Intergenic Intergenic  | 96741  | NM_00101 | 229389 | Otol1    | Gm414      |
| chr7  | 26492577 | 26492725 | Intergenic Intergenic  | 11421  | NM_02877 | 52132  | Ccdc97   | 1200014H1  |
| chr6  | 1.31E+08 | 1.31E+08 | intron (NM intron (NM  | 492    | NM_13911 | 56449  | Ybx3     | Csda Dpba  |
| chr11 | 5402352  | 5402725  | Intergenic MIRc SINE   | -18106 | NM_01384 | 22433  | Xbp1     | D11Ert390  |
| chr7  | 1.07E+08 | 1.07E+08 | promoter-1promoter-1   | 64     | NM_02601 | 67164  | Lipt2    | 2610209A2  |
| chr8  | 80774527 | 80774975 | intron (NMB1_Mus1 !    | 37510  | NM_18309 | 73301  | Ttc29    | 1700031F1  |
| chr15 | 63832702 | 63832800 | intron (NM intron (NM  | 59259  | NM_14484 | 223601 | Fam49b   | 0910001AC  |
| chr2  | 4802077  | 4802425  | promoter-1promoter-1   | -359   | NM_17540 | 109079 | Sephs1   | 1110046B2  |
| chr10 | 40020802 | 40020875 | intron (NM CpG         | 1154   | NM_00744 | 1E+08  | Amd2     | AdoMetDC   |
| chr8  | 93463902 | 93464050 | intron (NM intron (NM  | 111242 | NM_17722 | 109151 | Chd9     | 1810014J1  |
| chr14 | 35306977 | 35307175 | intron (NMLx7 LINE L   | 8656   | NM_00975 | 12166  | Bmpr1a   | 1110037I2  |
| chr9  | 65064852 | 65065000 | intron (NM intron (NM  | 2429   | NM_17746 | 214424 | Parp16   | ARTD15 B0  |
| chr6  | 67215852 | 67216025 | Intergenic Intergenic  | -1035  | NM_00111 | 66870  | Serbp1   | 1200009K1  |
| chr8  | 47570352 | 47570600 | intron (NML1MB4 LIN    | 14080  | NM_00798 | 14081  | Acsl1    | Acas Acas1 |
| chr6  | 1.34E+08 | 1.34E+08 | intron (NM intron (NM  | 5863   | NM_00796 | 14011  | Etv6     | AW123102   |
| chr11 | 1.01E+08 | 1.01E+08 | promoter-1promoter-1   | -928   | NM_01692 | 11975  | Atp6v0a1 | AA959968   |
| chr17 | 79626677 | 79626825 | Intergenic Intergenic  | 127680 | NM_02651 | 260409 | Cdc42ep3 | 3200001F0  |
| chr11 | 1.2E+08  | 1.2E+08  | intron (NM CpG         | 335    | NM_01075 | 17134  | Mafg     | AA545192   |
| chr16 | 33185327 | 33185450 | 5' UTR (NV 5' UTR (NV  | 231    | NM_17684 | 106326 | Osbp11   | 9430097N0  |
| chr1  | 88406102 | 88406225 | Intergenic Intergenic  | -17148 | NM_00897 | 19231  | Ptma     | Thym       |
| chr6  | 92042502 | 92042600 | intron (NM intron (NM  | 1139   | NM_01163 | 22026  | Nr2c2    | TAK1 Tr4   |
| chr4  | 1.16E+08 | 1.16E+08 | intron (NM CpG         | 216    | NM_17530 | 100465 | Mob3c    | AW822253   |
| chr7  | 1.08E+08 | 1.08E+08 | Intergenic MIR SINE    | -15296 | NM_00877 | 18442  | P2ry2    | P2U1 P2Y2  |
| chr11 | 53164452 | 53165000 | intron (NM CpG         | 457    | NM_03356 | 93736  | Aff4     | AF5Q31 AI  |

|       |          |          |             |             |        |           |        |            |            |
|-------|----------|----------|-------------|-------------|--------|-----------|--------|------------|------------|
| chr4  | 1.35E+08 | 1.35E+08 | intron (NM  | intron (NM  | 32503  | NM_01973  | 12399  | Runx3      | AML2 Cbfa  |
| chr5  | 1.47E+08 | 1.47E+08 | promoter-1  | promoter-1  | 132    | NM_02877  | 74132  | Rnf6       | 120001310f |
| chr2  | 1.25E+08 | 1.25E+08 | intron (NM  | CpG         | 445    | NM_00116  | 17876  | Myef2      | 9430071BC  |
| chr17 | 31432552 | 31432625 | promoter-1  | promoter-1  | 160    | NM_15306  | 224674 | Slc37a1    | G3PP       |
| chr3  | 89074377 | 89074675 | promoter-1  | promoter-1  | -34    | NM_00905  | 19729  | Slc50a1    | MmSWEET    |
| chr13 | 1.08E+08 | 1.08E+08 | intron (NM  | CpG         | 257    | NM_02966  | 76582  | Ipo11      | 1700081HC  |
| chr6  | 1.13E+08 | 1.13E+08 | intron (NM  | intron (NM  | 1900   | NM_00124  | 67767  | Jagn1      | 5830427H1  |
| chr12 | 1.1E+08  | 1.1E+08  | Intergenic  | Intergenic  | -28295 | NM_00953  | 22632  | Yy1        | AW488674   |
| chr3  | 94819577 | 94819800 | promoter-1  | promoter-1  | -528   | NM_03007  | 78266  | Zfp687     | 4931408L0  |
| chr1  | 1.73E+08 | 1.73E+08 | promoter-1  | promoter-1  | -396   | NM_01948  | 56009  | Alyref2    | C130042O1  |
| chr1  | 1.66E+08 | 1.66E+08 | intron (NM  | CpG         | 592    | NM_02877  | 240880 | Scyl3      | 1200016D2  |
| chr7  | 1.29E+08 | 1.29E+08 | promoter-1  | promoter-1  | 91     | NM_00103  | 76179  | Usp31      | 6330567E2  |
| chr18 | 4969677  | 4970025  | Intergenic  | Intergenic  | -76736 | NM_15315  | 225115 | Svil       | AU024053   |
| chr1  | 88159677 | 88159775 | intron (NM  | intron (NM  | -40070 | NM_14522  | 227327 | B3gnt7     | C330001H2  |
| chr4  | 1.07E+08 | 1.07E+08 | intron (NM  | intron (NM  | 38308  | NM_02561  | 66526  | Tceanc2    | 2210010B2  |
| chr6  | 83745502 | 83745700 | intron (NM  | intron (NM  | 449    | NM_00116  | 56174  | Nagk       | Gnk        |
| chr15 | 80085202 | 80085350 | promoter-1  | promoter-1  | -338   | NM_00128  | 11911  | Atf4       | Atf-4 C/AT |
| chr4  | 1.49E+08 | 1.49E+08 | promoter-1  | promoter-1  | -925   | NM_00102  | 18707  | Pik3cd     | 2410099E0  |
| chr10 | 1.27E+08 | 1.27E+08 | promoter-1  | promoter-1  | -425   | NM_01976  | 56351  | Ptges3     | 5730442A2  |
| chr8  | 67350877 | 67351025 | intron (NM  | URR1A DN    | 22871  | NM_17863  | 77113  | Klhl2      | 6030411N2  |
| chr4  | 89941052 | 89941150 | Intergenic  | RMER16-in   | 55590  | NM_15310  | 236537 | Zfp352     | 2czf48     |
| chr17 | 35372752 | 35372900 | promoter-1  | promoter-1  | -66    | NM_01090  | 18038  | Nfkbil1    | Def-7 IKBL |
| chr12 | 1.12E+08 | 1.12E+08 | intron (NM  | intron (NM  | 1695   | NM_01163  | 22031  | Traf3      | AI528849 f |
| chr3  | 86029152 | 86029275 | exon (NM_   | exon (NM_   | 601    | NM_00107  | 80877  | Lrba       | C80285 D3  |
| chr5  | 1.36E+08 | 1.36E+08 | intron (NM  | intron (NM  | -68910 | NM_14893  | 107939 | Pom121     | 2610027A1  |
| chr12 | 1.2E+08  | 1.2E+08  | promoter-1  | promoter-1  | -400   | NM_00116  | 20688  | Sp4        | 5730497NC  |
| chr1  | 53798977 | 53799175 | Intergenic  | Intergenic  | -35448 | NM_00125  | 627872 | Dnah7a     | Dnahc7 Dr  |
| chr3  | 97828377 | 97828575 | intron (NM  | intron (NM  | 11015  | NM_01092  | 18129  | Notch2     | AI853703   |
| chr3  | 89716827 | 89717300 | promoter-1  | promoter-1  | 21     | NM_01055  | 16194  | Il6ra      | CD126 IL-6 |
| chr16 | 30502627 | 30502800 | Intergenic  | (CGAG)n S   | 47951  | NM_17261  | 224090 | Tmem44     | 1700007NC  |
| chr1  | 36697352 | 36697575 | intron (NM  | (CA)n Simf  | 42565  | NM_00112  | 381337 | Fam178b    | 1700024G1  |
| chr14 | 49895077 | 49895250 | Intergenic  | Intergenic  | -30060 | NM_02595  | 67082  | 1700011H1- |            |
| chr2  | 1.73E+08 | 1.73E+08 | promoter-1  | promoter-1  | 92     | NM_02443  | 19334  | Rab22a     | 3732413A1  |
| chr14 | 56178802 | 56179000 | promoter-1  | promoter-1  | 35     | NM_13373  | 28199  | Dcaf11     | 0710008A1  |
| chr12 | 25339952 | 25340175 | exon (NM_   | exon (NM_   | 3827   | NM_17835  | 194655 | Klf11      | 9830142A1  |
| chr8  | 74246752 | 74247200 | intron (NR_ | intron (NR_ | 2604   | NR_028267 | 74015  | Fcho1      | 3322402E1  |
| chr16 | 62786577 | 62787175 | promoter-1  | promoter-1  | -334   | NM_17892  | 106338 | Nsun3      | 6720484AC  |
| chr9  | 1.09E+08 | 1.09E+08 | exon (NM_   | exon (NM_   | 5562   | NM_08043  | 107934 | Celsr3     | Fmi1 flami |
| chr5  | 1.3E+08  | 1.3E+08  | Intergenic  | Intergenic  | -11803 | NM_02712  | 69568  | Vkorc1l1   | 2310024KC  |
| chr7  | 1.47E+08 | 1.47E+08 | promoter-1  | promoter-1  | -179   | NM_05311  | 93747  | Echs1      | C80529     |
| chr17 | 71644002 | 71644250 | intron (NM  | intron (NM  | 16179  | NM_14515  | 246707 | Emilin2    | FOAP-10    |
| chr14 | 55222952 | 55223075 | intron (NM  | intron (NM  | 1732   | NM_02889  | 74359  | 4931414P1- |            |
| chr3  | 94247477 | 94247575 | intron (NM  | CpG         | 268    | NM_03011  | 78523  | Mrpl9      | 8030480E2  |
| chr2  | 1.74E+08 | 1.74E+08 | Intergenic  | Intergenic  | -4558  | NM_02232  | 64138  | Ctsz       | AI787083 , |
| chr1  | 1.22E+08 | 1.22E+08 | intron (NM  | intron (NM  | 12919  | NM_00101  | 319229 | Sctr       | 6530402OC  |
| chr1  | 1.82E+08 | 1.82E+08 | 5' UTR (NV  | 5' UTR (NV  | 433    | NM_02637  | 226747 | Ahctf1     | 6230412P2  |
| chr6  | 1.27E+08 | 1.27E+08 | Intergenic  | Lx5 LINE L  | -51880 | NM_00103  | 381812 | Cracr2a    | Efcab4b Gi |

|       |          |          |               |            |         |          |        |           |            |
|-------|----------|----------|---------------|------------|---------|----------|--------|-----------|------------|
| chr12 | 1.07E+08 | 1.07E+08 | intron (NM    | intron (NM | 21653   | NM_00102 | 22367  | Vrk1      | 51PK       |
| chr11 | 19825202 | 19825300 | intron (NM    | CpG        | 806     | NM_03352 | 114716 | Spred2    | C79158     |
| chr12 | 74387452 | 74387575 | promoter-1    | promoter-1 | 185     | NM_02958 | 76357  | Trmt5     | 261002701  |
| chr10 | 79756352 | 79756575 | exon (NM_     | exon (NM_  | 1287    | NM_00909 | 20054  | Rps15     | rig        |
| chr12 | 33452202 | 33452675 | Intergenic    | Intergenic | -52762  | NM_02152 | 59027  | Nampt     | 111003501  |
| chr2  | 1.52E+08 | 1.52E+08 | Intergenic    | Intergenic | -9575   | NM_00778 | 12995  | Csnk2a1   | Csnk2a1-rs |
| chr6  | 72295477 | 72295600 | promoter-1    | promoter-1 | -369    | NM_13859 | 28035  | Usp39     | AA408960   |
| chr6  | 57653027 | 57653175 | exon (NM_     | exon (NM_  | 652     | NM_13373 | 71835  | Lancl2    | 1700003F1  |
| chr1  | 58643102 | 58643500 | promoter-1    | promoter-1 | -124    | NM_17251 | 213056 | Fam126b   | C130065N:  |
| chr11 | 22541427 | 22541775 | Intergenic    | Lx8 LINE L | 129315  | NM_15359 | 103765 | Tmem17    | AI503894 , |
| chr6  | 1.19E+08 | 1.19E+08 | intron (NM    | intron (NM | -2013   | NM_00125 | 12288  | Cacna1c   | Cav1.2 Ccl |
| chr6  | 1.19E+08 | 1.19E+08 | intron (NM    | intron (NM | 8140    | NM_13394 | 101358 | Fbxl14    | AW322056   |
| chr17 | 26388827 | 26388950 | promoter-1    | promoter-1 | -967    | NM_02588 | 66978  | Luc7l     | 1810045CC  |
| chr9  | 40449452 | 40449775 | Intergenic    | Intergenic | -44434  | NM_13373 | 71566  | Clmp      | 9030425E1  |
| chr2  | 53051227 | 53051475 | exon (NM_     | exon (NM_  | 233     | NM_02298 | 65103  | Arl6ip6   | 2310057CC  |
| chr5  | 1.39E+08 | 1.39E+08 | intron (NM    | intron (NM | 9428    | NM_03056 | 80752  | Fam20c    | C76981 DM  |
| chr11 | 1.04E+08 | 1.04E+08 | promoter-1    | promoter-1 | 308     | NM_00128 | 217232 | Cdc27     | AI452358 , |
| chr15 | 79722452 | 79722725 | promoter-1    | promoter-1 | -250    | NM_00116 | 80287  | Apobec3   | Arp3 BC00  |
| chr8  | 25568002 | 25568350 | Intergenic    | Intergenic | -18758  | NM_02693 | 69068  | 18100110: | 1110065BC  |
| chr19 | 37382302 | 37382425 | intron (NM    | B1F SINE , | 22740   | NM_03115 | 15925  | Ide       | 1300012GC  |
| chr2  | 1.63E+08 | 1.63E+08 | intron (NM    | CpG        | 130     | NM_17215 | 245866 | Ift52     | BC037708   |
| chr5  | 3420302  | 3420525  | intron (NM    | intron (NM | 76101   | NM_00987 | 12571  | Cdk6      | 5830411I2  |
| chr12 | 1.13E+08 | 1.13E+08 | 5' UTR (NV    | 5' UTR (NV | 147     | NM_00102 | 16593  | Klc1      | AI874768   |
| chr10 | 1.17E+08 | 1.17E+08 | Intergenic    | MTE2b LTI  | 13052   | NM_01737 | 17105  | Lyz2      | AI326280   |
| chr4  | 1.48E+08 | 1.48E+08 | intron (NM    | intron (NM | 136712  | NM_02719 | 69743  | Casz1     | 2410019PC  |
| chr9  | 99080877 | 99081000 | Intergenic    | Intergenic | -40308  | NM_02909 | 74769  | Pik3cb    | 1110001JO  |
| chr6  | 1.18E+08 | 1.18E+08 | promoter-1    | promoter-1 | -141    | NM_19433 | 213895 | Bms1      | AA408648   |
| chr8  | 4677502  | 4677675  | Intergenic    | CpG        | 64418   | NM_14559 | 233987 | Zfp958    | -          |
| chr1  | 88400502 | 88401000 | Intergenic    | CpG        | -22560  | NM_00897 | 19231  | Ptma      | Thym       |
| chr10 | 1.11E+08 | 1.11E+08 | Intergenic    | ID_B1 SINI | -30482  | NM_00100 | 237542 | Osbpl8    | AA536976   |
| chr5  | 23957977 | 23958100 | promoter-1    | promoter-1 | 43      | NM_00125 | 213990 | Agap3     | AGAP-3 AV  |
| chr14 | 35124252 | 35124600 | promoter-1    | promoter-1 | 513     | NM_00813 | 14661  | Glud1     | AI118167 U |
| chr7  | 1.26E+08 | 1.26E+08 | Intergenic    | Intergenic | 23826   | NM_00103 | 319622 | Itpr1p12  | C130081G2  |
| chr5  | 1.22E+08 | 1.22E+08 | intron (NM    | CpG        | 683     | NM_00912 | 20239  | Atxn2     | 9630045M   |
| chr4  | 71860852 | 71860925 | intron (NM    | CpG        | 1039    | NM_01159 | 21885  | Tle1      | C230057CC  |
| chr10 | 82406852 | 82407150 | Intergenic    | RMER19B    | -41241  | NM_02143 | 58250  | Chst11    | 1110020PC  |
| chr11 | 1.01E+08 | 1.01E+08 | promoter-1    | promoter-1 | -29     | NM_02656 | 68107  | Cntd1     | 1700051CC  |
| chr4  | 1.19E+08 | 1.19E+08 | intron (NM    | CpG        | 585     | NM_17269 | 230700 | Foxj3     | C330039GC  |
| chr9  | 54397252 | 54397600 | intron (NM    | intron (NM | 10460   | NM_01968 | 56506  | Cib2      | 2810434I2: |
| chr13 | 58503652 | 58504475 | promoter-1    | promoter-1 | 105     | NM_00116 | 74386  | Rmi1      | 4932432N1  |
| chr13 | 47139402 | 47139475 | promoter-1    | promoter-1 | 570     | NM_17226 | 218214 | Kdm1b     | 4632428NC  |
| chr12 | 1.19E+08 | 1.19E+08 | intron (NM    | CpG        | 17924   | NM_17593 | 217944 | Rapgef5   | 4932413M   |
| chr3  | 96301452 | 96301525 | Intergenic    | Intergenic | -27620  | NM_02712 | 69585  | Hfe2      | 2310035L1  |
| chr6  | 64377377 | 64377475 | intron (NML1_ | Mur3 L     | -301714 | NM_00750 | 11921  | Atoh1     | Hath1 MA'  |
| chr11 | 23184502 | 23184725 | exon (NM_     | exon (NM_  | -22282  | NM_00119 | 17847  | Usp34     | A530081CC  |
| chr7  | 19857252 | 19857425 | promoter-1    | promoter-1 | -135    | NM_00128 | 22323  | Vasp      | -          |
| chr6  | 52196277 | 52196550 | promoter-1    | promoter-1 | -604    | NM_01045 | 15396  | Hoxa11    | Hox-1.9 Hc |

|       |          |          |             |            |         |          |        |            |            |
|-------|----------|----------|-------------|------------|---------|----------|--------|------------|------------|
| chr2  | 76513377 | 76513675 | 5' UTR (NM  | 5' UTR (NM | 154     | NM_03125 | 83435  | Plekha3    | FAPP1      |
| chr10 | 95280202 | 95280275 | Intergenic  | L1MB4 LIN  | -123059 | NM_00100 | 216238 | Eea1       | A430109M   |
| chr14 | 52534002 | 52534250 | promoter-1  | promoter-1 | -963    | NM_01386 | 29811  | Ndrp2      | AI182517 , |
| chr7  | 1.25E+08 | 1.25E+08 | intron (NM  | CpG        | 398     | NM_17066 | 267019 | Rps15a     | A630031B1  |
| chr3  | 1.44E+08 | 1.44E+08 | promoter-1  | promoter-1 | -428    | NM_00116 | 16911  | Lmo4       | A730077C1  |
| chr3  | 84284352 | 84284475 | promoter-1  | promoter-1 | -52     | NM_00103 | 229474 | Fhdc1      | 6330505N2  |
| chr2  | 1.57E+08 | 1.57E+08 | promoter-1  | promoter-1 | -231    | NM_00113 | 19650  | Rbl1       | AW547426   |
| chr2  | 1.28E+08 | 1.28E+08 | intron (NM  | intron (NM | -11443  | NM_14553 | 228576 | Mall       | BC012256   |
| chr13 | 55312452 | 55312600 | intron (NM  | CpG        | 1383    | NM_00873 | 18193  | Nsd1       | AI528500 I |
| chr12 | 1.14E+08 | 1.14E+08 | promoter-1  | promoter-1 | -290    | NM_17891 | 104759 | Pld4       | AI132321 I |
| chr5  | 17339777 | 17339900 | intron (NM  | intron (NM | 1876    | NM_00115 | 12491  | Cd36       | FAT GPIV   |
| chr10 | 87848527 | 87848800 | intron (NM  | intron (NM | 6506    | NM_00100 | 432486 | Gnptab     | EG432486   |
| chr4  | 1.4E+08  | 1.4E+08  | intron (NM  | intron (NM | 81845   | NM_00111 | 72754  | Arhgef10l  | 2810441CC  |
| chr17 | 34088002 | 34088075 | TTS (NM_0   | TTS (NM_0  | 395     | NM_01942 | 54218  | B3galt4    | Gal-T2 Gal |
| chr2  | 1.81E+08 | 1.81E+08 | intron (NM  | intron (NM | 433     | NM_19816 | 229004 | Gmeb2      | AI839884   |
| chr8  | 88078952 | 88079175 | intron (NM  | CpG        | 107     | NM_01979 | 56445  | Dnaja2     | 1500017M   |
| chr19 | 6077352  | 6077600  | promoter-1  | promoter-1 | -289    | NM_00108 | 68505  | Vps51      | 1110014N2  |
| chr4  | 87101927 | 87102375 | Intergenic  | Lx7 LINE L | -225707 | NM_17242 | 76376  | Slc24a2    | 2810021B1  |
| chr5  | 1.23E+08 | 1.23E+08 | Intergenic  | Intergenic | -8442   | NM_18330 | 330188 | Ccdc63     | 4921511C1  |
| chr3  | 51894202 | 51894375 | intron (NM  | intron (NM | 14640   | NM_00100 | 433586 | Maml3      | AV234550   |
| chr12 | 76126302 | 76126500 | intron (NM  | intron (NM | 151918  | NM_17280 | 238271 | Kcnh5      | Eag2       |
| chr11 | 1.01E+08 | 1.01E+08 | promoter-1  | promoter-1 | -363    | NM_01148 | 20848  | Stat3      | 1110034CC  |
| chr6  | 1.15E+08 | 1.15E+08 | intron (NM  | intron (NM | 2579    | NM_01114 | 19016  | Pparg      | Nr1c3 PPA  |
| chr19 | 41492502 | 41493025 | Intergenic  | Intergenic | -33203  | NM_03137 | 83490  | Pik3ap1    | 1810044J0  |
| chr18 | 61927377 | 61927450 | intron (NM  | intron (NM | 18903   | NM_17892 | 106877 | Afap1l1    | AI173486   |
| chr11 | 95685227 | 95685350 | promoter-1  | promoter-1 | -526    | NM_15310 | 237928 | Phospho1   | D11Moh36   |
| chr15 | 5093252  | 5093525  | promoter-1  | promoter-1 | -473    | NM_00101 | 105787 | Prkaa1     | AI194361 , |
| chr10 | 1.17E+08 | 1.17E+08 | 3' UTR (NV  | 3' UTR (NV | -8543   | NM_00763 | 12461  | Cct2       | Cctb       |
| chr10 | 9620177  | 9620425  | intron (NM  | CpG        | 537     | NM_00108 | 78808  | Stxbp5     | 0710001E2  |
| chr17 | 12870202 | 12870350 | Intergenic  | ORR1E LTF  | -1572   | NM_00920 | 20517  | Slc22a1    | Lx1 Oct1 C |
| chr12 | 86451827 | 86451950 | exon (NM_   | exon (NM_  | 105     | NM_03022 | 78920  | Dlst       | 1600017E0  |
| chr2  | 83483827 | 83483950 | promoter-1  | promoter-1 | -847    | NM_02693 | 69082  | Zc3h15     | 1700006A1  |
| chr5  | 1.26E+08 | 1.26E+08 | Intergenic  | Intergenic | 67201   | NM_01674 | 20778  | Scarb1     | AI120173 I |
| chr5  | 31828977 | 31829500 | promoter-1  | promoter-1 | -103    | NM_02815 | 72195  | Supt7l     | 2610524BC  |
| chr12 | 32339377 | 32339925 | promoter-1  | promoter-1 | 40      | NM_02800 | 71916  | Dus4l      | 2310069PC  |
| chr4  | 11180777 | 11180850 | intron (NM  | intron (NM | 593     | NM_17811 | 72656  | Ints8      | 2810013E0  |
| chr15 | 8684152  | 8684550  | Intergenic  | (CAAAA)n   | -23544  | NM_14893 | 20512  | Slc1a3     | AI504299 I |
| chr17 | 9167677  | 9167975  | intron (NM  | intron (NM | -13372  | NM_02585 | 66931  | 1700010I1- |            |
| chr14 | 58042952 | 58043025 | promoter-1  | promoter-1 | 80      | NM_00937 | 21821  | lft88      | AW552028   |
| chr12 | 33986952 | 33987150 | promoter-1  | promoter-1 | -329    | NM_00103 | 380753 | Atxn7l1    | 2810423GC  |
| chr10 | 94977802 | 94978000 | intron (NM  | CpG        | 105     | NM_08056 | 93765  | Ube2n      | 1500026J1  |
| chr17 | 27694127 | 27694375 | intron (NM  | CpG-6155   | 653     | NM_00116 | 111241 | Hmga1-rs1  | ENSMUSGC   |
| chr16 | 56075002 | 56075475 | promoter-1  | promoter-1 | -284    | NM_02548 | 66315  | Senp7      | 2410152H1  |
| chr12 | 83347402 | 83347675 | intron (NML | L1M4c LIN  | -64798  | NM_17257 | 217692 | Sipa1l1    | 4931426N1  |
| chr3  | 60206352 | 60206700 | Intergenic  | Intergenic | -70226  | NM_00125 | 56758  | Mbnl1      | Mbnl mKI/  |
| chr8  | 1.12E+08 | 1.12E+08 | 5' UTR (NV  | 5' UTR (NV | 168     | NM_00130 | 11765  | Ap1g1      | AA409002   |
| chr5  | 1.04E+08 | 1.04E+08 | Intergenic  | RMER10B    | -1636   | NM_05326 | 114664 | Hsd17b11   | Dhrs8 Pan  |

|       |          |          |             |             |         |           |          |          |            |
|-------|----------|----------|-------------|-------------|---------|-----------|----------|----------|------------|
| chr19 | 25213852 | 25214100 | intron (NM  | intron (NM  | -97716  | NM_18140  | 107351   | Kank1    | A930031BC  |
| chr4  | 1.03E+08 | 1.03E+08 | intron (NM  | intron (NM  | -51483  | NM_00116  | 67344    | Tctex1d1 | 170005501  |
| chr7  | 1.35E+08 | 1.35E+08 | promoter-1  | promoter-1  | 82      | NM_02637  | 67773    | Kat8     | 2010203CC  |
| chr1  | 1.22E+08 | 1.22E+08 | Intergenic  | Intergenic  | 20295   | NM_00103  | 13167    | Dbi      | ACBD1 Act  |
| chr15 | 5135502  | 5136025  | 5' UTR (NV  | 5' UTR (NV  | 203     | NM_02621  | 67515    | Ttc33    | 2410099M   |
| chr1  | 53841527 | 53841625 | intron (NM  | intron (NM  | 483     | NM_13381  | 98267    | Stk17b   | 3110009AC  |
| chr4  | 1.39E+08 | 1.39E+08 | promoter-1  | promoter-1  | 167     | NM_02533  | 110198   | Akr7a5   | 0610025K2  |
| chr6  | 76641802 | 76641975 | Intergenic  | MT2A LTR    | -550823 | NM_02888  | 74342    | Lrrtm1   | 4632401DC  |
| chr7  | 4866752  | 4866825  | promoter-1  | promoter-1  | -31     | NM_17075  | 232816   | Zfp628   | Zec Znf628 |
| chr15 | 78234627 | 78234725 | intron (NM  | intron (NM  | 1613    | NM_00943  | 22117    | Tst      | Rhodanese  |
| chr7  | 1.03E+08 | 1.03E+08 | Intergenic  | Intergenic  | -25121  | NM_01185  | 23966    | Tenm4    | Doc4 ELM1  |
| chr7  | 73375702 | 73375825 | Intergenic  | Intergenic  | 121362  | NM_00108  | 269941   | Chsy1    | mKIAA099C  |
| chr13 | 1.09E+08 | 1.09E+08 | intron (NM  | intron (NM  | 7145    | NM_17868  | 218581   | Depdc1b  | 9830132OC  |
| chr11 | 3377427  | 3377750  | intron (NR_ | intron (NR_ | -10642  | NM_17279  | 237625   | Pla2g3   | -          |
| chr9  | 1.08E+08 | 1.08E+08 | intron (NM  | intron (NM  | 6585    | NM_00813  | 14678    | Gnai2    | C76432 Ga  |
| chr2  | 1.59E+08 | 1.59E+08 | intron (NM  | CpG         | 170     | NM_00129  | 71715    | Dhx35    | 1200009DC  |
| chr11 | 1.13E+08 | 1.13E+08 | intron (NM  | intron (NM  | 166     | NM_00116  | 69806    | Slc39a11 | 1810074D2  |
| chr13 | 37962452 | 37962725 | intron (NM  | intron (NM  | -17715  | NR_033218 | 68750    | Rreb1    | 1110037NC  |
| chr12 | 58545702 | 58545875 | intron (NM  | intron (NM  | 101320  | NM_00825  | 15375    | Foxa1    | Hnf-3a Hnf |
| chr18 | 24147777 | 24147950 | promoter-1  | promoter-1  | -272    | NM_01175  | 22694    | Zfp35    | Zfp-35 Znf |
| chr4  | 1.33E+08 | 1.33E+08 | promoter-1  | promoter-1  | -480    | NM_00128  | 20111    | Rps6ka1  | Mapkapk-1  |
| chr7  | 1.05E+08 | 1.05E+08 | promoter-1  | promoter-1  | -79     | NM_02367  | 12729    | Clns1a   | 2610036DC  |
| chr1  | 1.8E+08  | 1.8E+08  | promoter-1  | promoter-1  | -436    | NM_02662  | 68226    | Efcab2   | 1700073KC  |
| chr15 | 97610002 | 97610100 | Intergenic  | ORR1B1 L1   | -4745   | NM_02635  | 67739    | Slc48a1  | 4930570CC  |
| chr5  | 92751652 | 92751900 | 3' UTR (NV  | 3' UTR (NV  | 5329    | NM_00859  | 17329    | Cxcl9    | BB139920   |
| chr11 | 58088177 | 58088350 | Intergenic  | Intergenic  | -32308  | NM_18299  | 103836   | Zfp692   | AI746306 , |
| chr2  | 1.56E+08 | 1.56E+08 | intron (NM  | CpG         | 230     | NM_17267  | 228829   | Phf20    | 6820402O2  |
| chr8  | 59849777 | 59849925 | Intergenic  | Intergenic  | 50071   | NM_01040  | 15111    | Hand2    | AI225906 , |
| chr11 | 90447602 | 90447725 | intron (NM  | intron (NM  | 51759   | NM_01150  | 20913    | Stxbp4   | 6030470M   |
| chr9  | 20750702 | 20750925 | intron (NM  | MLT1E2 L1   | 6254    | NM_00119  | 13433    | Dnmt1    | Cxxc9 Dnr  |
| chr3  | 37352702 | 37353025 | intron (NM  | intron (NM  | 33661   | NM_02134  | 57815    | Spata5   | 2510048F2  |
| chr5  | 1.08E+08 | 1.08E+08 | intron (NM  | CpG         | 379     | NM_01698  | 1.01E+08 | Rpl5     | U21RNA     |
| chr17 | 36007277 | 36007350 | intron (NM  | intron (NM  | 3753    | NM_17524  | 76448    | Ppp1r18  | 2310014HC  |
| chr4  | 1.55E+08 | 1.55E+08 | promoter-1  | promoter-1  | 523     | NM_00766  | 12537    | Cdk11b   | AA989746   |
| chr6  | 50405602 | 50405800 | intron (NM  | CpG         | 468     | NM_00116  | 71720    | Osbpl3   | 1200014M   |
| chr13 | 56038302 | 56038800 | Intergenic  | Intergenic  | -105765 | NM_01109  | 18740    | Pitx1    | Bft P-OTX  |
| chr2  | 92025752 | 92026000 | intron (NM  | intron (NM  | 236     | NM_00110  | 192285   | Phf21a   | 80kDa Bhc  |
| chr1  | 79758327 | 79758925 | promoter-1  | promoter-1  | -282    | NM_02705  | 69368    | Wdfy1    | 1700013BC  |
| chr8  | 23969452 | 23969600 | promoter-1  | promoter-1  | -485    | NM_00108  | 244349   | Kat6a    | 1500036M   |
| chr13 | 38296827 | 38296900 | promoter-1  | promoter-1  | 55      | NM_02638  | 67797    | Snrnp48  | 1110050F0  |
| chr12 | 1.07E+08 | 1.07E+08 | Intergenic  | Intergenic  | -16931  | NM_00974  | 12062    | Bdkrb2   | B(2) B2 B2 |
| chr11 | 1.2E+08  | 1.2E+08  | promoter-1  | promoter-1  | 52      | NM_00108  | 208092   | Chmp6    | 2400004GC  |
| chr16 | 16870952 | 16871025 | promoter-1  | promoter-1  | 4       | NM_01162  | 21976    | Top3b    | -          |
| chr3  | 1.49E+08 | 1.49E+08 | Intergenic  | CpG         | -33689  | NM_00108  | 99633    | Lphn2    | AI450192 f |
| chr5  | 65144327 | 65144625 | Intergenic  | Intergenic  | -50286  | NM_00845  | 16599    | Klf3     | 9930027GC  |
| chr1  | 43884377 | 43884525 | intron (NM  | CpG         | 102     | NM_02643  | 67883    | Uxs1     | 160002511: |
| chr14 | 75347152 | 75347250 | exon (NM_   | exon (NM_   | 483     | NM_00125  | 380916   | Lrch1    | 4832412D1  |

|       |          |          |                        |         |           |        |            |            |
|-------|----------|----------|------------------------|---------|-----------|--------|------------|------------|
| chr1  | 93294902 | 93295300 | intron (NM CpG         | 259     | NM_02334  | 67444  | Ilkap      | 0710007A1  |
| chr10 | 79253502 | 79253575 | Intergenic Intergenic  | -1808   | NM_00104  | 73106  | Prss57     | 2900092M   |
| chr8  | 1.23E+08 | 1.23E+08 | intron (NM intron (NM  | 972     | NM_19867  | 382034 | Gse1       | 221001311  |
| chr19 | 45088577 | 45088800 | promoter-1promoter-1   | -978    | NM_14550  | 226154 | Lzts2      | BC014695   |
| chr6  | 57641802 | 57642025 | exon (NM_ exon (NM_    | 159     | NM_02557  | 66459  | Pyurf      | 2610022GC  |
| chr11 | 61080227 | 61080650 | exon (NM_ exon (NM_    | 191     | NM_00743  | 11671  | Aldh3a2    | AI194803 , |
| chr3  | 96048702 | 96048775 | promoter-1promoter-1   | -642    | NM_17821  | 319192 | Hist2h2aa2 | H2a-614 H  |
| chr6  | 34730402 | 34730775 | 5' UTR (NM 5' UTR (NM  | 156     | NM_00128  | 76223  | Agbl3      | 2900053G1  |
| chr17 | 46972502 | 46972700 | Intergenic CT-rich Lov | -4239   | NM_00110  | 210982 | Gltscr1l   | mKIAA024(  |
| chr4  | 1.01E+08 | 1.01E+08 | intron (NM intron (NM  | 109729  | NM_19803  | 320508 | Cachd1     | 1190007F1  |
| chr3  | 40549802 | 40549950 | intron (NM intron (NM  | 341     | NM_01102  | 18415  | Hspa4l     | 94kDa AI4  |
| chr2  | 32391402 | 32391475 | 5' UTR (NM 5' UTR (NM  | 559     | NM_15356  | 98952  | Fam102a    | AI426465 ) |
| chr11 | 77328777 | 77328975 | exon (NM_ exon (NM_    | 257     | NM_02618  | 67477  | Abhd15     | 1300007F0  |
| chr6  | 90319977 | 90320175 | exon (NM_ exon (NM_    | 588     | NM_03026  | 80292  | Zxdc       | A930012H:  |
| chr4  | 1.34E+08 | 1.34E+08 | intron (NM ID_B1 SINI  | 6306    | NM_14555  | 100017 | Ldlrap1    | AA691260   |
| chr1  | 1.35E+08 | 1.35E+08 | exon (NM_ exon (NM_    | 783     | NM_13381  | 108954 | Ppp1r15b   | 1810033K1  |
| chr2  | 69627702 | 69627975 | promoter-1promoter-1   | 44      | NM_02852  | 73373  | Phospho2   | 1700048E2  |
| chr14 | 67689877 | 67691700 | intron (NM CpG         | 520     | NM_02803  | 71978  | Ppp2r2a    | 2410004DC  |
| chr12 | 1.19E+08 | 1.19E+08 | intron (NM MLT1B LTF   | 1086    | NM_17593  | 217944 | Rapgef5    | 4932413M   |
| chr6  | 91050802 | 91050900 | intron (NM MER2 DNA    | 15969   | NM_01881  | 54563  | Nup210     | 9830001L1  |
| chr3  | 20055452 | 20055625 | promoter-1promoter-1   | -523    | NM_01375  | 27357  | Gyg        | AU017667   |
| chr3  | 89882327 | 89882425 | intron (NM intron (NM  | -1067   | NM_00125  | 59069  | Tpm3       | TM30nm T   |
| chr5  | 1.26E+08 | 1.26E+08 | Intergenic B1_Mur1 :   | -12589  | NM_01963  | 22190  | Ubc        | 2700054OC  |
| chr12 | 87000377 | 87000600 | Intergenic Intergenic  | -27182  | NM_01676  | 53314  | Batf       | B-ATF SFA- |
| chr9  | 1.05E+08 | 1.05E+08 | promoter-1promoter-1   | 53      | NM_05315  | 94062  | Mrpl3      | 2010320L1  |
| chr2  | 90936652 | 90936900 | promoter-1promoter-1   | -178    | NM_01135  | 20375  | Spi1       | Dis-1 Dis1 |
| chr16 | 22656027 | 22656100 | intron (NM intron (NM  | 1241    | NM_13865  | 110197 | Dgkg       | 2900055E1  |
| chr15 | 72897127 | 72897200 | Intergenic B3A SINE    | -5529   | NM_00116  | 76510  | Trappc9    | 1810044A2  |
| chr9  | 1.16E+08 | 1.16E+08 | Intergenic L3 LINE Cf  | 90730   | NM_02957  | 21813  | Tgfbr2     | 1110020H1  |
| chr1  | 72367352 | 72367750 | intron (NM Lx8 LINE L  | 13556   | NM_00953  | 22596  | Xrcc5      | AI314015 I |
| chr15 | 66144077 | 66144275 | Intergenic Intergenic  | -26390  | NM_15292  | 110862 | Kcnq3      | -          |
| chr9  | 13553777 | 13554025 | intron (NR_ CpG        | 276     | NR_02402: | 77116  | Mtmr2      | 6030445P1  |
| chr1  | 92895052 | 92895125 | promoter-1promoter-1   | -216    | NM_00111  | 16978  | Lrrfip1    | AU024550   |
| chr7  | 1.48E+08 | 1.48E+08 | Intergenic B1_Mus1 :   | -5138   | NM_13394  | 101613 | Nlrp6      | AI504961 , |
| chr9  | 22247652 | 22247975 | intron (NM RLTR44E L'  | 24987   | NM_01873  | 55934  | Rp9        | PAP-1 Rp9  |
| chr14 | 70575127 | 70575450 | intron (NM intron (NM  | 1334    | NM_00125  | 213019 | Pdlim2     | 4732462F1  |
| chr10 | 80363302 | 80363375 | TTS (NM_0 TTS (NM_0    | 376     | NM_01389  | 30055  | Timm13     | D10Erd37:  |
| chr4  | 91223727 | 91223950 | Intergenic Intergenic  | -157163 | NM_20768  | 15569  | Elavl2     | Hub mel-N  |
| chr6  | 1.01E+08 | 1.01E+08 | promoter-1promoter-1   | -350    | NM_18159  | 72171  | Shq1       | 2810403P1  |
| chr1  | 13363902 | 13364025 | intron (NM CpG         | 201     | NM_00107  | 17978  | Ncoa2      | 9530095N1  |
| chr18 | 37965627 | 37965900 | promoter-1promoter-1   | -301    | NM_03358  | 93706  | Pcdhgc3    | PC43 Pcdh  |
| chr17 | 71890402 | 71890550 | Intergenic Intergenic  | -10925  | NM_00114  | 70891  | Spdya      | 4921517JO: |
| chr8  | 77559002 | 77559075 | intron (NM intron (NM  | 1453    | NM_01162  | 21968  | Tom1       | -          |
| chr10 | 6190652  | 6190950  | 3' UTR (NM 3' UTR (NM  | -110589 | NM_03118  | 83397  | Akap12     | AI317366 : |
| chr8  | 95472927 | 95473125 | Intergenic MTEa LTR    | -11920  | NM_00920  | 20538  | Slc6a2     | NE-T NET   |
| chr17 | 57367502 | 57367775 | promoter-1promoter-1   | -79     | NM_00977  | 12266  | C3         | AI255234 , |
| chr15 | 38008727 | 38008800 | promoter-1promoter-1   | -154    | NM_00108  | 70790  | Ubr5       | Edd Edd1   |

|       |          |          |                        |         |          |          |            |             |
|-------|----------|----------|------------------------|---------|----------|----------|------------|-------------|
| chr4  | 1.25E+08 | 1.25E+08 | intron (NM CpG         | 276     | NM_17524 | 76793    | Snip1      | 2410133M    |
| chr3  | 1.04E+08 | 1.04E+08 | intron (NR_intron (NR_ | 1410    | NM_00130 | 15257    | Hipk1      | 1110062KC   |
| chr2  | 52826577 | 52826725 | intron (NM intron (NM  | 109749  | NM_17240 | 71409    | Fmnl2      | 5430425KC   |
| chr12 | 1.04E+08 | 1.04E+08 | promoter-1promoter-1   | -83     | NM_17762 | 217835   | Rin3       | 6430500KC   |
| chr4  | 65266277 | 65266425 | intron (NM intron (NM  | 331     | NM_00116 | 69807    | Trim32     | 1810045E1   |
| chr7  | 50800102 | 50800200 | Intergenic Intergenic  | -11610  | NM_02129 | 12489    | Cd33       | Siglec-3 gp |
| chr10 | 21920152 | 21920300 | intron (NM RLTR45 LT   | 26518   | NM_00901 | 19370    | Raet1c     | RAE-1gamr   |
| chr4  | 46464402 | 46465475 | intron (NM CpG         | 949     | NM_13088 | 67628    | Anp32b     | 2410015B1   |
| chr17 | 71201102 | 71201175 | promoter-1promoter-1   | -64     | NM_00116 | 21815    | Tgif1      | AA959811    |
| chr1  | 37375027 | 37375150 | intron (NM intron (NM  | 18405   | NM_00129 | 269180   | Inpp4a     | 107kDa 96   |
| chr1  | 1.01E+08 | 1.01E+08 | Intergenic Intergenic  | 302412  | NM_02758 | 70866    | Slco6d1    | 492151110!  |
| chr7  | 1.17E+08 | 1.17E+08 | Intergenic Intergenic  | -7590   | NM_02149 | 19347    | Dennd5a    | 1500012B1   |
| chr17 | 36116027 | 36116475 | promoter-1promoter-1   | 161     | NM_14548 | 75210    | Prr3       | 4930540GC   |
| chr2  | 1.66E+08 | 1.66E+08 | intron (NM intron (NM  | 497     | NM_00125 | 228880   | Zmynd8     | 1110013E2   |
| chr4  | 1.52E+08 | 1.52E+08 | promoter-1promoter-1   | -22     | NM_00127 | 19934    | Rpl22      | 2700038K1   |
| chr12 | 71186877 | 71186975 | intron (NM intron (NM  | 16915   | NM_00108 | 18080    | Nin        | 3110068G2   |
| chr10 | 40058102 | 40058200 | Intergenic RMER15 L    | -10963  | NM_00129 | 78334    | Cdk19      | 2700084L0   |
| chr19 | 46375827 | 46376025 | Intergenic MYSERV6-i   | -3301   | NM_00117 | 18034    | Nfkb2      | NF-kappaB   |
| chr19 | 5601052  | 5601350  | promoter-1promoter-1   | -672    | NM_02661 | 68209    | Rnaseh2c   | 1500026D1   |
| chr12 | 1.14E+08 | 1.14E+08 | promoter-1promoter-1   | 12      | NM_02802 | 71963    | Cdca4      | 2410018CC   |
| chr1  | 1.82E+08 | 1.82E+08 | Intergenic Intergenic  | -38605  | NM_02637 | 226747   | Ahctf1     | 6230412P2   |
| chr13 | 17677377 | 17677650 | intron (NM intron (NM  | 109086  | NM_13865 | 192136   | Sugct      | 5033411D1   |
| chr1  | 72531677 | 72531775 | intron (NM intron (NM  | 51412   | NM_00104 | 381270   | 4-Mar      | BC056494    |
| chr4  | 43575077 | 43575175 | promoter-1promoter-1   | 329     | NM_01160 | 21894    | Tln1       | Tln         |
| chr11 | 48647802 | 48648000 | intron (NM intron (NM  | 8261    | NM_05316 | 94089    | Trim7      | AI790312    |
| chr6  | 1.23E+08 | 1.23E+08 | Intergenic Intergenic  | -27020  | NM_00117 | 26888    | Clec4a2    | Clec4a Cle  |
| chr8  | 74999852 | 74999950 | promoter-1promoter-1   | -769    | NM_13858 | 27967    | Cherp      | 573040811:  |
| chr4  | 1.55E+08 | 1.55E+08 | Intergenic Intergenic  | -22169  | NM_14555 | 230996   | 9430015G1- |             |
| chr2  | 57364252 | 57364400 | Intergenic Intergenic  | 273533  | NM_01027 | 14571    | Gpd2       | AA408484    |
| chr2  | 1.04E+08 | 1.04E+08 | intron (NM CpG         | 733     | NM_01043 | 15259    | Hipk3      | DYRK6 FIS   |
| chr3  | 95498377 | 95498650 | Intergenic Intergenic  | -6732   | NM_14489 | 229595   | Adamtsl4   | Tsrc1       |
| chr17 | 47448202 | 47448375 | intron (NM intron (NM  | -57548  | NM_00114 | 64657    | Mrps10     | 1110038B1   |
| chr2  | 25092902 | 25093000 | promoter-1promoter-1   | -644    | NM_00103 | 329360   | Rnf224     | Gm757       |
| chr1  | 1.29E+08 | 1.29E+08 | intron (NM intron (NM  | 17463   | NM_14512 | 107895   | Mgat5      | 4930471A2   |
| chr1  | 1.38E+08 | 1.38E+08 | intron (NM intron (NM  | 3773    | NM_00103 | 16565    | Kif21b     | 2610511N2   |
| chr6  | 1.08E+08 | 1.08E+08 | promoter-1promoter-1   | 76      | NM_14593 | 58911    | Sumf1      | AA543204    |
| chr16 | 19973627 | 19973750 | intron (NM intron (NM  | 9434    | NM_18339 | 239743   | Klhl6      | -           |
| chr13 | 1.01E+08 | 1.01E+08 | Intergenic LTR33B LT   | 117187  | NM_01373 | 27220    | Cartpt     | Cart        |
| chr10 | 1.16E+08 | 1.16E+08 | promoter-1promoter-1   | -259    | NM_00103 | 72068    | Cnot2      | 2600016M    |
| chr6  | 48971102 | 48971325 | Intergenic Intergenic  | -15304  | NM_05311 | 93695    | Gpnmb      | DC-HIL Dcl  |
| chr16 | 4594902  | 4595050  | intron (NM CpG         | 263     | NM_03118 | 83396    | Glis2      | Gli5 Klf16  |
| chr9  | 91876627 | 91877075 | Intergenic Intergenic  | -210923 | NM_00119 | 1.01E+08 | Plscr5     | 331000      |
| chr11 | 76220477 | 76220875 | promoter-1promoter-1   | 31      | NM_01981 | 56322    | Timm22     | Tim22       |
| chr11 | 4998627  | 4999000  | promoter-1promoter-1   | 278     | NM_00128 | 14030    | Ewsr1      | Ews Ewsh    |
| chr1  | 1.35E+08 | 1.35E+08 | promoter-1promoter-1   | -201    | NM_00857 | 17248    | Mdm4       | 4933417NC   |
| chr6  | 1.29E+08 | 1.29E+08 | promoter-1promoter-1   | -43     | NM_13864 | 108078   | Olr1       | LOX-1 SR-E  |
| chr3  | 89382652 | 89382975 | intron (NM intron (NM  | 58727   | NM_08046 | 140493   | Kcnn3      | KCa2.3 SK3  |



|       |          |          |            |            |         |           |        |           |            |
|-------|----------|----------|------------|------------|---------|-----------|--------|-----------|------------|
| chr15 | 13695602 | 13695725 | Intergenic | Intergenic | -592269 | NM_00766  | 12563  | Cdh6      | K-cadherin |
| chr1  | 39539352 | 39539750 | Intergenic | Intergenic | -3959   | NM_01877  | 54610  | Tbc1d8    | AD3 HBLP:  |
| chr7  | 1.39E+08 | 1.39E+08 | exon (NM_  | exon (NM_  | 186     | NM_02665  | 68277  | 2310057M  | 3110040E1  |
| chrX  | 34730552 | 34730750 | promoter-1 | promoter-1 | 582     | NM_01944  | 54405  | Ndufa1    | 1810049F1  |
| chr17 | 56751527 | 56754050 | promoter-1 | promoter-1 | -30     | NM_01873  | 54217  | Rpl36     | -          |
| chr8  | 1.1E+08  | 1.1E+08  | promoter-1 | promoter-1 | 186     | NM_13922  | 97484  | Cog8      | BB235941   |
| chr8  | 9460727  | 9460925  | intron (NM | intron (NM | 310197  | NM_17344  | 270028 | Fam155a   | 6430500D1  |
| chr1  | 1.58E+08 | 1.58E+08 | intron (NM | intron (NM | 17297   | NM_02232  | 240832 | Tor1aip2  | 1110020D1  |
| chr2  | 1.29E+08 | 1.29E+08 | intron (NM | intron (NM | 783     | NM_00129  | 19261  | Sirpa     | AI835480   |
| chr1  | 78592427 | 78592650 | Intergenic | Intergenic | -61862  | NM_00103  | 74205  | Acsl3     | 2610510B1  |
| chr3  | 81736452 | 81736750 | promoter-1 | promoter-1 | 63      | NM_17766  | 229445 | Ctso      | A330105D0  |
| chr1  | 39485202 | 39485300 | intron (NM | intron (NM | 50341   | NM_01877  | 54610  | Tbc1d8    | AD3 HBLP:  |
| chr2  | 35992377 | 35992550 | promoter-1 | promoter-1 | -239    | NR_027515 | 67889  | Rbm18     | 2010004P1  |
| chr7  | 1.48E+08 | 1.48E+08 | promoter-1 | promoter-1 | -988    | NM_00117  | 107702 | Rnh1      | AW546468   |
| chr8  | 1.1E+08  | 1.1E+08  | intron (NM | intron (NM | 606     | NM_01081  | 17463  | Psmc7     | AW107203   |
| chr11 | 51451777 | 51451850 | Intergenic | Intergenic | -2415   | NM_02534  | 66089  | Rmnd5b    | 0610039K2  |
| chr1  | 93334152 | 93334525 | intron (NM | intron (NM | 21567   | NM_01106  | 18627  | Per2      | mKIAA0347  |
| chr5  | 1.37E+08 | 1.37E+08 | Intergenic | Intergenic | -7113   | NM_01196  | 26433  | Plod3     | AI414586   |
| chr1  | 1.1E+08  | 1.1E+08  | Intergenic | Intergenic | 67905   | NM_00115  | 20725  | Serpinb8  | CAP-2 CAP  |
| chr5  | 1.23E+08 | 1.23E+08 | intron (NM | intron (NM | 1266    | NM_00100  | 30841  | Kdm2b     | Cxxc2 E430 |
| chr8  | 1.25E+08 | 1.25E+08 | Intergenic | CpG        | 22314   | NM_00766  | 12555  | Cdh15     | AI323380   |
| chr2  | 61368802 | 61368975 | Intergenic | Intergenic | -47755  | NM_01152  | 21353  | Tank      | C86182 E4  |
| chr8  | 87514402 | 87514475 | promoter-1 | promoter-1 | -56     | NM_13325  | 170833 | Hook2     | A630054I0  |
| chr11 | 1.17E+08 | 1.17E+08 | intron (NM | intron (NM | 20641   | NM_00111  | 53860  | 9-Sep     | MSF1 Msf   |
| chr7  | 16638577 | 16638875 | Intergenic | Intergenic | -18565  | NM_00109  | 666528 | Zfp541    | EG666528   |
| chr8  | 63996477 | 63996550 | intron (NM | intron (NM | 29982   | NM_14559  | 234309 | Cbr4      | A730083J1  |
| chr12 | 1.03E+08 | 1.03E+08 | promoter-1 | promoter-1 | -357    | NM_02844  | 109181 | Trip11    | 2610511G2  |
| chr3  | 1.31E+08 | 1.31E+08 | Intergenic | Intergenic | -94439  | NM_01070  | 16842  | Lef1      | 3000002BC  |
| chr2  | 1.53E+08 | 1.53E+08 | Intergenic | Intergenic | 18197   | NM_14553  | 228788 | Ccm2l     | -          |
| chr8  | 97118327 | 97118525 | intron (NM | intron (NM | 7200    | NM_02822  | 102122 | Fam192a   | 1700001O1  |
| chr15 | 89026702 | 89027050 | promoter-1 | promoter-1 | 29      | NM_02708  | 69440  | Dennd6b   | 1700027J0  |
| chr7  | 4100852  | 4101225  | exon (NM_  | exon (NM_  | 436     | NM_17552  | 243813 | Leng9     | 9530024C2  |
| chr12 | 1.13E+08 | 1.13E+08 | Intergenic | MTD LTR    | 81344   | NM_00109  | 668303 | Kif26a    | mKIAA1236  |
| chr11 | 51694527 | 51694850 | Intergenic | Intergenic | -23705  | NM_19929  | 76901  | Jade2     | 1200017KC  |
| chr4  | 1.2E+08  | 1.2E+08  | exon (NM_  | exon (NM_  | 533     | NM_01956  | 56222  | Cited4    | MRG-2 Mr   |
| chr13 | 55546702 | 55547100 | exon (NM_  | exon (NM_  | 209     | NM_00111  | 26385  | Grk6      | Gprk6      |
| chr2  | 1.05E+08 | 1.05E+08 | intron (NM | CpG        | 215     | NM_00112  | 99003  | Qser1     | 4732486I2: |
| chr8  | 1.21E+08 | 1.21E+08 | Intergenic | Intergenic | -239509 | NM_02675  | 68533  | Mphosph6  | 1110001M   |
| chr5  | 1.4E+08  | 1.4E+08  | exon (NM_  | exon (NM_  | 286     | NM_17485  | 231830 | Micall2   | A930021H:  |
| chr11 | 4087077  | 4087150  | intron (NM | CpG        | 277     | NM_13402  | 103724 | Tbc1d10a  | AI447804   |
| chr1  | 1.46E+08 | 1.46E+08 | Intergenic | Intergenic | -7874   | NM_14599  | 214498 | Cdc73     | 8430414L1  |
| chr4  | 1.21E+08 | 1.21E+08 | Intergenic | Intergenic | -7512   | NM_00108  | 109263 | Rlf       | 9230110M   |
| chr5  | 77017977 | 77018200 | Intergenic | CpG        | -2651   | NM_19903  | 381644 | Cep135    | BC062951   |
| chr1  | 1.45E+08 | 1.45E+08 | Intergenic | Lx5 LINE L | -590701 | NM_02002  | 26878  | B3galt2   | -          |
| chr5  | 1.09E+08 | 1.09E+08 | promoter-1 | promoter-1 | 270     | NM_15356  | 231580 | Gak       | D130045N:  |
| chr4  | 1.17E+08 | 1.17E+08 | promoter-1 | promoter-1 | -252    | NM_17524  | 76608  | Hectd3    | 1700064KC  |
| chr1  | 1.82E+08 | 1.82E+08 | TTS (NM_0  | TTS (NM_0  | 51284   | NM_00108  | 381310 | 6330403AC | ENSMUSGC   |

|       |          |          |                      |         |          |        |          |            |
|-------|----------|----------|----------------------|---------|----------|--------|----------|------------|
| chr6  | 91827477 | 91827575 | promoter-1promoter-1 | -521    | NM_17273 | 232236 | Ccdc174  | C130022K2  |
| chr1  | 1.55E+08 | 1.55E+08 | intron (NM           | 449     | NM_00103 | 71836  | Shcbp1l  | 1700012A1  |
| chr2  | 1.29E+08 | 1.29E+08 | exon (NM_            | 230     | NM_02719 | 69737  | Ttl      | 2410003M   |
| chr14 | 79918852 | 79919000 | intron (NM           | 3445    | NM_00128 | 13709  | Elf1     | Elf-1 Sts1 |
| chr2  | 1.31E+08 | 1.31E+08 | promoter-1promoter-1 | -265    | NM_00768 | 12616  | Cenpb    | -          |
| chr2  | 13459777 | 13460125 | intron (NM           | 6340    | NM_01006 | 13434  | Trdmt1   | Dnmt2 Rni  |
| chr8  | 23372902 | 23373075 | Intergenic           | -20925  | NM_19925 | 234129 | Tpte     | Pten2      |
| chr3  | 1.07E+08 | 1.07E+08 | intron (NM           | 1040    | NM_15356 | 229707 | Strip1   | 6330569M   |
| chr2  | 1.56E+08 | 1.56E+08 | intron (NM           | 269     | NM_01982 | 56407  | Trpc4ap  | 4833429F0  |
| chr12 | 76697477 | 76697575 | promoter-1promoter-1 | -339    | NM_01202 | 26932  | Ppp2r5e  | 4633401M   |
| chr1  | 13152452 | 13152625 | intron (NM           | -35294  | NM_00108 | 383491 | Prdm14   | -          |
| chr7  | 75056852 | 75056950 | Intergenic           | -40242  | NM_01051 | 16001  | Igf1r    | A330103N;  |
| chr10 | 77425702 | 77425825 | intron (NM           | 6854    | NM_13830 | 28240  | Trpm2    | 9830168K1  |
| chr11 | 50244352 | 50244525 | exon (NM_            | 175     | NM_17255 | 216724 | Rufy1    | 3000002E0  |
| chr2  | 27294152 | 27294225 | Intergenic           | -11843  | NM_00950 | 22325  | Vav2     | 2810040F1  |
| chr5  | 77584452 | 77584875 | Intergenic           | -40515  | NM_17560 | 74318  | Hopx     | 1110018K1  |
| chr13 | 1.05E+08 | 1.05E+08 | Intergenic           | -28690  | NM_00108 | 108154 | Adamts6  | 5031426K1  |
| chr12 | 1.06E+08 | 1.06E+08 | promoter-1promoter-1 | -801    | NM_00104 | 212073 | Syne3    | nesprin-3  |
| chr7  | 1E+08    | 1E+08    | Intergenic           | 12062   | NM_02142 | 58238  | Fam181b  | A830059I2  |
| chr9  | 1.1E+08  | 1.1E+08  | intron (NM           | 451     | NM_00869 | 18054  | Ngp      | bectenecin |
| chr1  | 1.68E+08 | 1.68E+08 | Intergenic           | -39922  | NM_03024 | 27878  | Tada1    | 2900026B1  |
| chr7  | 87547302 | 87547375 | intron (NM           | 310     | NM_01104 | 18550  | Furin    | 9130404I0: |
| chr9  | 98197002 | 98197375 | 5' UTR (NM           | 186     | NM_14453 | 74080  | Nmnat3   | 4933408N0  |
| chr2  | 1.58E+08 | 1.58E+08 | 5' UTR (NM           | 137     | NM_00129 | 228850 | Ralgapb  | 9330195P1  |
| chr1  | 1.33E+08 | 1.33E+08 | 3' UTR (NM           | -7448   | NM_01977 | 56489  | Ikbke    | AW55820I   |
| chr6  | 54631977 | 54632075 | intron (NM           | 408     | NM_00128 | 68235  | Mturn    | 2410066E1  |
| chr10 | 1.17E+08 | 1.17E+08 | Intergenic           | -30621  | NM_02445 | 215449 | Rap1b    | 2810443E1  |
| chr16 | 30388527 | 30388800 | promoter-1promoter-1 | -47     | NM_00112 | 224088 | Atp13a3  | AU022875   |
| chr12 | 58545477 | 58545625 | intron (NM           | 101557  | NM_00825 | 15375  | Foxa1    | Hnf-3a Hnf |
| chr16 | 17209627 | 17209950 | exon (NM_            | 1560    | NM_00103 | 239731 | Rimbp3   | Gm1759 G   |
| chr1  | 80010177 | 80010450 | Intergenic           | -155073 | NM_00925 | 20720  | Serpine2 | B230326M   |
| chr9  | 1.16E+08 | 1.16E+08 | promoter-1promoter-1 | -295    | NM_00937 | 21813  | Tgfb2    | 1110020H1  |
| chr19 | 10650902 | 10651050 | promoter-1promoter-1 | 611     | NM_02841 | 72982  | Tmem138  | 1700113I0: |
| chr11 | 60597627 | 60597700 | exon (NM_            | 6636    | NM_17549 | 237782 | Smcr8    | 2310076G0  |
| chr2  | 1.53E+08 | 1.53E+08 | intron (NM           | 6689    | NM_13384 | 99237  | Tm9sf4   | AA986553   |
| chr7  | 1.29E+08 | 1.29E+08 | promoter-1promoter-1 | 164     | NM_02614 | 67417  | Ears2    | 3230401I0: |
| chr8  | 1.29E+08 | 1.29E+08 | Intergenic           | -2952   | NM_00116 | 270110 | Irf2bp2  | E130305N2  |
| chr8  | 12671827 | 12671975 | intron (NM           | 199     | NM_19803 | 259279 | Tubgcp3  | GCP3 Spc9  |
| chr15 | 99712277 | 99712425 | Intergenic           | -6464   | NM_00111 | 65970  | Lima1    | Eplin      |
| chr4  | 1.44E+08 | 1.44E+08 | intron (NM           | 11023   | NM_01130 | 20148  | Dhrs3    | Rsdr1 retS |
| chr5  | 1.15E+08 | 1.15E+08 | intron (NM           | 1338    | NM_02614 | 330171 | Kctd10   | AW536343   |
| chr1  | 1.62E+08 | 1.62E+08 | intron (NM           | -50565  | NM_00978 | 12301  | Cacybp   | SIP        |
| chr10 | 77011377 | 77011575 | exon (NM_            | 18383   | NM_00840 | 16414  | Itgb2    | 2E6 AI528! |
| chr1  | 1.08E+08 | 1.08E+08 | intron (NM           | 1305    | NM_00112 | 227449 | Zcchc2   | 9930114B2  |
| chr12 | 87583727 | 87583800 | intron (NM           | 935     | NM_02740 | 70373  | Gpatch2l | 1700020O0  |
| chr3  | 87881477 | 87881550 | intron (NM           | 713     | NM_17252 | 214191 | Ttc24    | A430025D0: |
| chr1  | 16218452 | 16218775 | TTS (NM_0            | 122650  | NM_13383 | 98711  | Rdh10    | 3110069K0  |

|       |          |          |                        |                  |                 |             |
|-------|----------|----------|------------------------|------------------|-----------------|-------------|
| chr4  | 1.45E+08 | 1.45E+08 | intron (NM MIRb SINE   | 1910 NM_01161    | 21938 Tnfrsf1b  | CD120b TN   |
| chr6  | 1.34E+08 | 1.34E+08 | Intergenic Intergenic  | -29396 NM_02577  | 66813 Bcl2l14   | 4930452K2   |
| chr14 | 31440777 | 31441000 | Intergenic Intergenic  | -1494 NM_01110   | 18753 Prkcd     | AI385711    |
| chr3  | 1.38E+08 | 1.38E+08 | intron (NM intron (NM  | 262 NM_01193     | 26377 Dapp1     | Bam32       |
| chr10 | 12547077 | 12547325 | intron (NM intron (NM  | 34332 NM_01168   | 22288 Utrn      | AA589569    |
| chr15 | 93425602 | 93426200 | intron (NM CpG         | 421 NM_00103     | 106042 Prickle1 | 1110058P2   |
| chr11 | 86621152 | 86621375 | promoter-1promoter-1   | -101 NM_02619    | 67487 Dhx40     | 2410016C1   |
| chr2  | 84990577 | 84990725 | Intergenic Intergenic  | 14134 NM_01178   | 23796 Aplnr     | APJ Agtrl1  |
| chr19 | 53464702 | 53465125 | 5' UTR (NM 5' UTR (NM  | 150 NM_17242     | 76479 Smndc1    | 2410004J2   |
| chr19 | 53215527 | 53215600 | intron (NM intron (NM  | 630 NM_00116     | 27360 Add3      | AI463285    |
| chr16 | 36260802 | 36260975 | Intergenic Intergenic  | -16346 NM_00108  | 20861 Stfa1     | Stefin-3 St |
| chr15 | 98711552 | 98711625 | exon (NM_exon (NM_     | 257 NM_02696     | 69159 Rhebl1    | 1810036J2   |
| chr11 | 8910877  | 8911350  | promoter-1promoter-1   | 27 NM_00831      | 15574 Hus1      | mHus1       |
| chr2  | 1.69E+08 | 1.69E+08 | promoter-1promoter-1   | -114 NM_00956    | 22722 Zfp64     | -           |
| chr16 | 34755977 | 34756075 | Intergenic Intergenic  | -29010 NM_13930  | 107589 Mylk     | 9530072E1   |
| chr1  | 64664527 | 64664750 | promoter-1promoter-1   | -896 NM_02596    | 67099 Mettl21a  | 2310038H1   |
| chr3  | 1.38E+08 | 1.38E+08 | promoter-1promoter-1   | -84 NR_12119'    | 56224 Tspan5    | 2810455AC   |
| chr16 | 11908727 | 11909450 | intron (NR_intron (NR_ | 428 NM_14606     | 223978 Cpped1   | C530044N'   |
| chr8  | 1.29E+08 | 1.29E+08 | Intergenic Intergenic  | -112927 NM_00116 | 270110 Irf2bp2  | E130305N2   |
| chr18 | 60720202 | 60720475 | promoter-1promoter-1   | -102 NM_02577    | 66810 Rbm22     | 8430430L2   |
| chr16 | 85152802 | 85153100 | intron (NM URR1B DN    | 21001 NM_00119   | 11820 App       | Abeta Abp   |
| chr7  | 1.34E+08 | 1.34E+08 | promoter-1promoter-1   | -168 NM_03056    | 70314 Rabep2    | 2610011AC   |
| chr18 | 36315402 | 36315475 | intron (NML2a LINE L   | 41376 NM_00116   | 1E+08 Nrg2      | Don1 NTA    |
| chr17 | 53709302 | 53709450 | intron (NM intron (NM  | 3080 NM_02000    | 18519 Kat2b     | A930006P1   |
| chr10 | 61978777 | 61979050 | Intergenic Intergenic  | -8410 NM_01115   | 19073 Srgn      | Prg Prg1 S  |
| chr3  | 1.04E+08 | 1.04E+08 | intron (NM intron (NM  | 2276 NM_00919    | 20501 Slc16a1   | AL022710    |
| chr1  | 40102702 | 40102850 | Intergenic Intergenic  | -38837 NM_01055  | 16178 Il1r2     | CD121b Il1  |
| chr1  | 1.3E+08  | 1.3E+08  | intron (NM RLTR12B L   | 68447 NM_02813   | 72160 Tmem163   | 2610024AC   |
| chr2  | 23904102 | 23904175 | intron (NM intron (NM  | 761 NM_08046     | 140483 Hnmt     | 1500031F0   |
| chr7  | 1.09E+08 | 1.09E+08 | intron (NM intron (NM  | 6069 NM_01956    | 56212 Rhog      | 2810426GC   |
| chr1  | 93147252 | 93147325 | intron (NM CpG         | 392 NM_02645     | 67921 Ube2f     | 2510010F1   |
| chr11 | 1.08E+08 | 1.08E+08 | intron (NM intron (NM  | 120651 NM_01110  | 18750 Prkca     | AI875142    |
| chr1  | 1.84E+08 | 1.84E+08 | intron (NM intron (NM  | 952 NM_00785     | 13244 Degs1     | AA536663    |
| chr9  | 1.07E+08 | 1.07E+08 | 5' UTR (NM 5' UTR (NM  | 459 NM_01157     | 21767 Tex264    | TEG-264     |
| chr2  | 1.7E+08  | 1.7E+08  | Intergenic Intergenic  | -11726 NM_00115  | 228913 Zfp217   | 4933431CC   |
| chr1  | 40381152 | 40381300 | promoter-1promoter-1   | -246 NM_13319    | 107527 Il1rl2   | AI481289 ,  |
| chr13 | 43304202 | 43304300 | intron (NM intron (NM  | -37381 NM_00125  | 67046 Tbc1d7    | 2610009CC   |
| chr13 | 99660852 | 99660950 | promoter-1promoter-1   | 96 NM_00104      | 238799 Tnp01    | AU021749    |
| chr9  | 1.08E+08 | 1.08E+08 | 5' UTR (NM 5' UTR (NM  | 133 NM_17514     | 69232 Qrich1    | 2610028HC   |
| chr8  | 1.09E+08 | 1.09E+08 | promoter-1promoter-1   | -212 NM_00922    | 20650 Sntb2     | Snt2        |
| chr2  | 24240902 | 24241075 | promoter-1promoter-1   | 71 NM_17761      | 215632 Psd4     | BC046518    |
| chr13 | 43493952 | 43494025 | exon (NM_exon (NM_     | 243 NM_02355     | 70078 Nol7      | 2210008F1   |
| chr8  | 36457277 | 36457425 | Intergenic Intergenic  | 18556 NM_17774   | 244416 Ppp1r3b  | 6430576E2   |
| chr8  | 1.24E+08 | 1.24E+08 | Intergenic Intergenic  | 16353 NM_02959   | 76405 1700018BC | 1700084O2   |
| chr5  | 1.38E+08 | 1.38E+08 | 5' UTR (NM 5' UTR (NM  | 603 NM_14491     | 231803 Mepce    | Bcdin3 D5'  |
| chr18 | 61714977 | 61715125 | promoter-1promoter-1   | -185 NM_14608    | 93687 Csnk1a1   | 2610208K1   |
| chr17 | 35188302 | 35188475 | intron (NM intron (NM  | 1200 NM_03344    | 114584 Clic1    | Clcp G6     |

|       |          |          |            |            |        |          |        |           |            |
|-------|----------|----------|------------|------------|--------|----------|--------|-----------|------------|
| chr2  | 92305052 | 92305200 | Intergenic | Intergenic | -4451  | NM_14583 | 228368 | Slc35c1   | E430007K1  |
| chr10 | 19796952 | 19797125 | intron (NM | (CCA)n Sin | -71688 | NM_00863 | 17761  | Map7      | E-MAP-115  |
| chr7  | 1.5E+08  | 1.5E+08  | intron (NM | intron (NM | 216    | NM_01128 | 19935  | Mrpl23    | L23mrp R   |
| chr14 | 1.06E+08 | 1.06E+08 | intron (NM | intron (NM | 831    | NM_13407 | 74213  | Rbm26     | 1700009PC  |
| chr6  | 90268802 | 90269000 | intron (NM | intron (NM | 6278   | NM_02792 | 71797  | Chst13    | 1110067M   |
| chr10 | 1.11E+08 | 1.11E+08 | Intergenic | MTD LTR I  | -5068  | NM_02860 | 73690  | Glpr1     | 24101140   |
| chr10 | 84728827 | 84729225 | Intergenic | Intergenic | -81227 | NM_00777 | 12952  | Cry1      | AU020726   |
| chr13 | 25034877 | 25035000 | promoter-1 | promoter-1 | -83    | NM_00815 | 14756  | Gpld1     | 6330541J1  |
| chr1  | 52289802 | 52289950 | 5' UTR (NV | 5' UTR (NV | 200    | NM_00108 | 14660  | Gls       | 6330442B1  |
| chr3  | 1.45E+08 | 1.45E+08 | intron (NM | CpG        | 312    | NM_02571 | 52184  | Odf2l     | 4733401DC  |
| chr2  | 1.16E+08 | 1.16E+08 | intron (NM | intron (NM | 174319 | NM_00115 | 17536  | Meis2     | A430109D   |
| chr13 | 1.02E+08 | 1.02E+08 | intron (NM | CpG        | 196    | NM_00987 | 12572  | Cdk7      | AI323415   |
| chr1  | 94728777 | 94728975 | intron (NM | CpG        | 613    | NM_01669 | 14733  | Gpc1      | AI462976   |
| chr1  | 1.08E+08 | 1.08E+08 | Intergenic | Intergenic | -18470 | NM_00112 | 227449 | Zcchc2    | 9930114B2  |
| chr4  | 1.41E+08 | 1.41E+08 | promoter-1 | promoter-1 | -254   | NM_17233 | 214063 | Dnajc16   | 2900037OC  |
| chr8  | 42050352 | 42050500 | intron (NM | intron (NM | 38839  | NM_02684 | 68797  | Pdgfrl    | 1110039P1  |
| chr10 | 1.28E+08 | 1.28E+08 | TTS (NM_0  | TTS (NM_0  | 912    | NM_02571 | 66701  | Spryd4    | 4633402N   |
| chr7  | 1.29E+08 | 1.29E+08 | promoter-1 | promoter-1 | 176    | NM_13858 | 28018  | Ubfd1     | AI467302   |
| chr18 | 46757627 | 46757775 | promoter-1 | promoter-1 | 343    | NM_01012 | 13664  | Eif1a     | C76390 Ef  |
| chr5  | 1.07E+08 | 1.07E+08 | intron (NM | ZP3AR Sat  | 3208   | NM_00127 | 12545  | Cdc7      | AI597260   |
| chr13 | 74777027 | 74777650 | promoter-1 | promoter-1 | 18     | NM_03071 | 80898  | Erap1     | Arts1 ERA  |
| chr4  | 1.24E+08 | 1.24E+08 | promoter-1 | promoter-1 | 50     | NM_01747 | 54170  | Rragc     | AU041672   |
| chr11 | 1.18E+08 | 1.18E+08 | intron (NM | intron (NM | 5030   | NM_00111 | 19157  | Cyth1     | CLM1 CTH   |
| chr2  | 1.3E+08  | 1.3E+08  | promoter-1 | promoter-1 | -347   | NM_02419 | 67134  | Nop56     | 2310044F1  |
| chr10 | 39679802 | 39680150 | promoter-1 | promoter-1 | -17    | NM_00117 | 1E+08  | G630090E1 | Naglt1c    |
| chr3  | 85914402 | 85914500 | intron (NM | intron (NM | 26095  | NM_00108 | 27059  | Sh3d19    | AW011754   |
| chr13 | 1.01E+08 | 1.01E+08 | intron (NM | intron (NM | 18476  | NM_00112 | 17948  | Naip2     | Birc1b Nai |
| chr7  | 1.28E+08 | 1.28E+08 | intron (NM | intron (NM | 979    | NM_02155 | 59052  | Mettl9    | 0610012DC  |
| chr1  | 1.66E+08 | 1.66E+08 | intron (NM | intron (NM | 827    | NM_00116 | 66352  | Blzf1     | 1700030GC  |
| chr4  | 58566002 | 58566125 | 5' UTR (NV | 5' UTR (NV | 102    | NM_17298 | 14745  | Lpar1     | AI326300   |
| chr10 | 62006377 | 62006550 | Intergenic | Intergenic | 34742  | NM_02819 | 72320  | 2510003E0 | 0710007C1  |
| chr1  | 94831027 | 94831200 | non-coding | non-coding | 128    | NM_01179 | 23830  | Capn10    | AW049679   |
| chr5  | 1.44E+08 | 1.44E+08 | Intergenic | Intergenic | -14360 | NM_00739 | 11461  | Actb      | Actx E430  |
| chr11 | 61757852 | 61758025 | Intergenic | Intergenic | -12327 | NM_00128 | 432572 | Specc1    | 2810012GC  |
| chr17 | 34259752 | 34259900 | promoter-1 | promoter-1 | 49     | NM_01038 | 14998  | H2-DMa    | H-2Ma H2   |
| chr15 | 98465377 | 98465575 | 5' UTR (NV | 5' UTR (NV | 278    | NM_00128 | 12297  | Cacnb3    | Beta3 CAB  |
| chr5  | 77695327 | 77695400 | intron (NM | CpG        | 844    | NM_01126 | 19712  | Rest      | 2610008JO  |
| chr4  | 63060377 | 63060550 | intron (NM | intron (NM | 4016   | NM_00104 | 100182 | Akna      | AI597013   |
| chr1  | 36290002 | 36290400 | intron (NM | intron (NM | 10946  | NM_19889 | 320011 | Uggt1     | 0910001L1  |
| chr6  | 52108477 | 52108625 | promoter-1 | promoter-1 | -235   | NM_01044 | 15394  | Hoxa1     | ERA1 Hox-  |
| chr7  | 88488752 | 88490950 | exon (NM_  | exon (NM_  | 269    | NM_00909 | 20068  | Rps17     | -          |
| chr2  | 84568127 | 84568200 | promoter-1 | promoter-1 | -738   | NM_13384 | 98985  | Clp1      | AI462438   |
| chr2  | 1.44E+08 | 1.44E+08 | Intergenic | ORR1B1 L1  | -15291 | NM_01977 | 56431  | Dstn      | 2610043P1  |
| chr13 | 41888302 | 41888500 | intron (NM | intron (NM | 54456  | NM_17541 | 109254 | Adtrp     | 9530008L1  |
| chr9  | 21172427 | 21172525 | promoter-1 | promoter-1 | 161    | NM_00104 | 16201  | Ilf3      | MBII-26 M  |
| chr19 | 4304552  | 4304650  | intron (NM | intron (NM | 1621   | NM_13086 | 110355 | Adrbk1    | Adrbk-1 B  |
| chr3  | 96305277 | 96305500 | Intergenic | tRNA-Glu-C | -23720 | NM_02712 | 69585  | Hfe2      | 2310035L1  |

|       |          |          |                        |        |           |        |           |            |
|-------|----------|----------|------------------------|--------|-----------|--------|-----------|------------|
| chr2  | 4803377  | 4803650  | intron (NM CpG         | 903    | NM_17540  | 109079 | Sephs1    | 1110046B2  |
| chr15 | 81756152 | 81756650 | 5' UTR (NM 5' UTR (NM  | 242    | NM_03022  | 78929  | Polr3h    | 5031409G2  |
| chr10 | 79870277 | 79870450 | promoter-1promoter-1   | -797   | NM_02565  | 66594  | Uqcr11    | 0710008DC  |
| chr18 | 6765302  | 6765600  | intron (NM CpG         | 286    | NM_00127  | 19330  | Rab18     | AA959686   |
| chr16 | 84736027 | 84736125 | promoter-1promoter-1   | -529   | NM_01740  | 27393  | Mrpl39    | C21orf8 M  |
| chr14 | 46277977 | 46278150 | promoter-1promoter-1   | -245   | NM_00104  | 114874 | Ddhd1     | PA-PLA1    |
| chr3  | 1.44E+08 | 1.44E+08 | Intergenic Intergenic  | 92458  | NM_00116  | 16911  | Lmo4      | A730077C1  |
| chr2  | 1.17E+08 | 1.17E+08 | intron (NM CpG         | 238    | NM_02662  | 68215  | Fam98b    | 2610510HC  |
| chr16 | 3717902  | 3718200  | promoter-1promoter-1   | 73     | NM_00116  | 54483  | Mefv      | FMF TRIM   |
| chr10 | 59812552 | 59812700 | intron (NM intron (NM  | 3027   | NM_02873  | 74048  | 4632428NC | Dies1 PD-1 |
| chr11 | 20712477 | 20712825 | Intergenic MIRb SINE   | 18460  | NM_17375  | 216551 | Lgalsl    | 1110067D2  |
| chr13 | 80996652 | 80996750 | Intergenic Cheshire C  | -25982 | NM_00104  | 105171 | Arrrdc3   | AI450344 I |
| chr2  | 68058052 | 68058200 | intron (NM intron (NM  | 115397 | NM_02028  | 26877  | B3galt1   | beta3Gal-T |
| chr9  | 1.06E+08 | 1.06E+08 | intron (NM intron (NM  | 5790   | NM_17292  | 245026 | Col6a6    | E330019B1  |
| chr11 | 1.07E+08 | 1.07E+08 | intron (NM intron (NM  | 14832  | NM_00103  | 18613  | Pecam1    | C85791 Cd  |
| chr17 | 12986952 | 12987050 | intron (NR intron (NR_ | -24429 | NM_01051  | 16004  | Igf2r     | AI661837 I |
| chr8  | 1.24E+08 | 1.24E+08 | intron (NM intron (NM  | 8770   | NM_08085  | 142682 | Zcchc14   | AA792890   |
| chr11 | 97145877 | 97146275 | Intergenic Intergenic  | -4186  | NM_00894  | 19155  | Npepps    | AAP-S MP:  |
| chr2  | 1.25E+08 | 1.25E+08 | intron (NM intron (NM  | 48623  | NM_00799  | 14118  | Fbn1      | AI536462 I |
| chr16 | 4969452  | 4969525  | intron (NM intron (NM  | 5106   | NR_07337C | 74684  | 4930451GC | -          |
| chr3  | 1.49E+08 | 1.49E+08 | Intergenic CpG         | -34477 | NM_00108  | 99633  | Lphn2     | AI450192 I |
| chr5  | 1.01E+08 | 1.01E+08 | promoter-1promoter-1   | -572   | NM_17240  | 70681  | Fam175a   | 3830405GC  |
| chr2  | 1.19E+08 | 1.19E+08 | intron (NM MIRb SINE   | -5752  | NM_00108  | 383787 | Ankrd63   | Gm1337     |
| chr4  | 1.34E+08 | 1.34E+08 | intron (NM intron (NM  | 1355   | NM_01695  | 15331  | Hmgn2     | HMG-17 H   |
| chr16 | 87496052 | 87496325 | promoter-1promoter-1   | -74    | NM_00984  | 12469  | Cct8      | AI132397 I |
| chr14 | 52504827 | 52505025 | exon (NM exon (NM_     | 409    | NM_00102  | 52535  | Mettl17   | 2310032K1  |
| chr1  | 52783777 | 52783900 | intron (NM CpG         | 324    | NM_17808  | 98682  | Mfsd6     | 2210010L0  |
| chr4  | 1.07E+08 | 1.07E+08 | intron (NR CpG         | 874    | NM_00108  | 16975  | Lrp8      | 4932703M   |
| chr4  | 10943702 | 10943975 | Intergenic Intergenic  | -9072  | NM_17517  | 71801  | Plekhf2   | 1110070J0  |
| chr3  | 1.16E+08 | 1.16E+08 | Intergenic Intergenic  | -25290 | NM_14490  | 229782 | Slc35a3   | 2310050P1  |
| chr9  | 69301652 | 69301825 | intron (NM CpG         | 248    | NM_00758  | 12306  | Anxa2     | AW215814   |
| chr17 | 47745077 | 47745250 | intron (NM intron (NM  | 3278   | NM_01685  | 53414  | Bysl      | Bys Enp1   |
| chr14 | 76410352 | 76410875 | promoter-1promoter-1   | 59     | NM_02681  | 68705  | Gtf2f2    | 1110031C1  |
| chr6  | 1.08E+08 | 1.08E+08 | intron (NM intron (NM  | 94323  | NM_01058  | 16438  | Itpr1     | D6Pas2 EN  |
| chr9  | 53909477 | 53909800 | intron (NM intron (NM  | 6580   | NM_00103  | 244882 | Tnfaip8I3 | 9930029PC  |
| chr1  | 1.83E+08 | 1.83E+08 | promoter-1promoter-1   | -369   | NM_14594  | 208768 | Sde2      | -          |
| chr19 | 34411252 | 34411525 | Intergenic L1MB5 LIN   | 46239  | NM_00114  | 14102  | Fas       | AI196731 I |
| chr15 | 78088327 | 78088500 | intron (NM intron (NM  | 13172  | NM_00867  | 17972  | Ncf4      | AI451400 I |
| chr9  | 41698527 | 41698850 | Intergenic CpG         | 233684 | NM_01143  | 20660  | Sorl1     | 2900010L1  |
| chr1  | 1.33E+08 | 1.33E+08 | Intergenic Intergenic  | -4346  | NM_01054  | 16153  | Il10      | CSIF Il-10 |
| chr12 | 1.05E+08 | 1.05E+08 | intron (NM intron (NM  | 3132   | NM_17302  | 271047 | Serpina3b | 6A1 A030C  |
| chr2  | 1.07E+08 | 1.07E+08 | intron (NM intron (NM  | 216    | NM_00102  | 212772 | Arl14ep   | 2700007P2  |
| chr9  | 89595827 | 89596050 | intron (NM intron (NM  | 3943   | NM_02536  | 66111  | Tmed3     | 1200002G1  |
| chr14 | 8932377  | 8932500  | intron (NM intron (NM  | 1711   | NM_17827  | 218699 | Pxk       | C230080L1  |
| chr2  | 35008777 | 35008900 | exon (NM exon (NM_     | 21084  | NM_00129  | 26920  | Cntrl     | 6720467OC  |
| chr15 | 1.02E+08 | 1.02E+08 | promoter-1promoter-1   | -288   | NM_00117  | 66151  | Prr13     | 1110020C1  |
| chr11 | 1.1E+08  | 1.1E+08  | intron (NM intron (NM  | 4577   | NM_01194  | 26399  | Map2k6    | MEK6 MKF   |

|       |          |          |             |             |         |           |        |          |            |
|-------|----------|----------|-------------|-------------|---------|-----------|--------|----------|------------|
| chr2  | 33259052 | 33259325 | Intergenic  | RSINE1 SIN  | 27656   | NM_00108  | 241311 | Zbtb34   | Gm349 ml   |
| chr5  | 1.01E+08 | 1.01E+08 | Intergenic  | Intergenic  | 37187   | NM_02797  | 71883  | Coq2     | 2310002F1  |
| chr14 | 51684452 | 51684575 | Intergenic  | tRNA-Pro-C  | 6604    | NM_20755  | 404319 | Olfir750 | GA_x5J8B7  |
| chr2  | 75496427 | 75496525 | promoter-1  | promoter-1  | -840    | NM_14613  | 229279 | Hnrnpa3  | 2410013L1  |
| chr1  | 1.27E+08 | 1.27E+08 | Intergenic  | Intergenic  | -27459  | NM_00120  | 74117  | Actr3    | 1200003AC  |
| chr11 | 40547527 | 40547625 | promoter-1  | promoter-1  | 413     | NM_00129  | 52653  | Nudcd2   | -          |
| chr1  | 1.89E+08 | 1.89E+08 | intron (NM  | intron (NM  | 25886   | NM_02636  | 67769  | Gpatch2  | 5830433G2  |
| chr4  | 1.52E+08 | 1.52E+08 | intron (NR_ | CpG         | 391     | NR_10229: | 19934  | Rpl22    | 2700038K1  |
| chr2  | 68636677 | 68636800 | Intergenic  | RLTR17 LT   | -62876  | NM_17285  | 241447 | Cers6    | 4732462CC  |
| chr17 | 46044452 | 46044575 | Intergenic  | Intergenic  | 117599  | NM_00111  | 22339  | Vegfa    | Vegf Vpf   |
| chr2  | 1.82E+08 | 1.82E+08 | Intergenic  | RLTR33 LT   | -60393  | NM_00120  | 672125 | Gm14496  | OTTMUSG(   |
| chr13 | 49393102 | 49393350 | intron (NM  | intron (NM  | 11351   | NM_01575  | 30938  | Fgd3     | 5830461L0  |
| chr5  | 91182977 | 91183125 | Intergenic  | Intergenic  | -5273   | NM_00914  | 20311  | Cxcl5    | AMCF-II EI |
| chr2  | 62510902 | 62511200 | intron (NM  | intron (NM  | 8667    | NM_14552  | 227960 | Gca      | 5133401E0  |
| chr5  | 1.22E+08 | 1.22E+08 | intron (NM  | intron (NM  | 2607    | NM_00965  | 11669  | Aldh2    | Ahd-5 Ahd  |
| chr6  | 47870452 | 47870700 | promoter-1  | promoter-1  | 9       | NM_00114  | 232784 | Zfp212   | Znf212 mk  |
| chr4  | 1.35E+08 | 1.35E+08 | intron (NM  | CpG         | 31628   | NM_01973  | 12399  | Runx3    | AML2 Cbfa  |
| chr15 | 73448052 | 73448275 | intron (NM  | intron (NM  | 7011    | NM_00103  | 106068 | Slc45a4  | 9330175BC  |
| chr4  | 8463452  | 8463875  | intron (NM  | intron (NM  | 872     | NM_02151  | 59021  | Rab2a    | 9330148M   |
| chr2  | 25356277 | 25356600 | promoter-1  | promoter-1  | 140     | NM_01390  | 30839  | Fbxw5    | AI159739 I |
| chr2  | 1.23E+08 | 1.23E+08 | promoter-1  | promoter-1  | -119    | NM_00116  | 59010  | Sqrdl    | 0610039J1  |
| chr8  | 1.25E+08 | 1.25E+08 | TTS (NR_02  | TTS (NR_02  | 214     | NM_00130  | 13057  | Cyba     | b558 nmf3  |
| chr2  | 30783077 | 30783150 | Intergenic  | Intergenic  | -24296  | NM_02241  | 64292  | Ptges    | 2410099E2  |
| chr15 | 34419502 | 34419775 | intron (NM  | intron (NM  | 5363    | NM_00828  | 15473  | Hrsp12   | HR12 HRP:  |
| chr6  | 48618177 | 48618250 | Intergenic  | Intergenic  | -7921   | NM_17496  | 317758 | Gimap9   | A630002K2  |
| chr1  | 1.34E+08 | 1.34E+08 | promoter-1  | promoter-1  | -134    | NM_17529  | 98415  | Nucks1   | 2700010L1  |
| chr13 | 20384202 | 20384400 | intron (NM  | intron (NM  | -180558 | NM_19809  | 140580 | Elmo1    | 6330578D2  |
| chr11 | 98638277 | 98638350 | Intergenic  | Intergenic  | -1622   | NM_14543  | 217166 | Nr1d1    | A530070CC  |
| chr5  | 1.3E+08  | 1.3E+08  | promoter-1  | promoter-1  | -640    | NM_01036  | 110006 | Gusb     | AI747421 I |
| chr14 | 62950827 | 62951000 | promoter-1  | promoter-1  | -29     | NM_02600  | 67153  | Rnaseh2b | 1110019NC  |
| chr4  | 1.28E+08 | 1.28E+08 | intron (NM  | intron (NM  | -119287 | NM_02703  | 69317  | Hmgb4    | 1700001F2  |
| chr7  | 50892602 | 50892825 | intron (NM  | MLT1D LTI   | 2604    | NM_02823  | 72431  | Ceacam18 | 2010110OC  |
| chr14 | 65931202 | 65931525 | intron (NM  | intron (NM  | 45825   | NM_01579  | 50759  | Fbxo16   | 4932435C2  |
| chr10 | 58699277 | 58699525 | Intergenic  | Intergenic  | 14731   | NM_17293  | 268301 | Sowahc   | 4921515AC  |
| chr11 | 45768777 | 45768925 | promoter-1  | promoter-1  | 154     | NM_00108  | 66628  | Thg1l    | -          |
| chr8  | 26178577 | 26178725 | intron (NM  | intron (NM  | -29217  | NM_00108  | 330723 | Htra4    | B430206E1  |
| chr12 | 81745402 | 81745475 | promoter-1  | promoter-1  | 236     | NM_02624  | 328133 | Slc39a9  | 2010002AC  |
| chr12 | 60317277 | 60317400 | intron (NM  | intron (NM  | 3132    | NM_00103  | 70611  | Fbxo33   | 5730501N2  |
| chr11 | 1.06E+08 | 1.06E+08 | promoter-1  | promoter-1  | -232    | NM_19829  | 21763  | Tex2     | 4930568E0  |
| chr7  | 25292852 | 25293075 | intron (NR_ | intron (NR_ | 857     | NR_110958 | 232969 | Zfp428   | 2410005HC  |
| chr19 | 55894852 | 55895025 | intron (NM  | intron (NM  | -74873  | NM_00114  | 21416  | Tcf7l2   | TCF4B TCF  |
| chr5  | 1.35E+08 | 1.35E+08 | Intergenic  | Intergenic  | -3131   | NR_10438: | 17969  | Ncf1     | NCF-47K N  |
| chr3  | 27588477 | 27588625 | intron (NM  | GA-rich Lo  | 20810   | NM_17318  | 72007  | Fndc3b   | 1600019OC  |
| chr10 | 79347427 | 79347525 | Intergenic  | Intergenic  | -1581   | NM_01577  | 50701  | Elane    | Ela2 F430C |
| chr4  | 1.49E+08 | 1.49E+08 | promoter-1  | promoter-1  | -34     | NM_00128  | 230917 | Tmem201  | AV028368   |
| chrX  | 1.31E+08 | 1.31E+08 | intron (NM  | intron (NM  | 730     | NM_01389  | 30058  | Timm8a1  | DXHXS1274  |
| chr19 | 15030677 | 15030775 | Intergenic  | Intergenic  | -358253 | NM_01160  | 21888  | Tle4     | 5730411M   |

|       |          |          |            |            |         |           |        |            |            |
|-------|----------|----------|------------|------------|---------|-----------|--------|------------|------------|
| chr19 | 9016502  | 9016725  | TTS (NM_1  | TTS (NM_1  | 203     | NM_01184  | 23942  | Mta2       | AW550797   |
| chr1  | 1.62E+08 | 1.62E+08 | intron (NM | intron (NM | -229960 | NR_02811: | 67647  | 4930523CC- |            |
| chr4  | 1.35E+08 | 1.35E+08 | Intergenic | Intergenic | 39603   | NM_01679  | 51796  | Srrm1      | AA407769   |
| chr1  | 9788302  | 9788450  | intron (NM | CpG        | 165     | NM_17754  | 170755 | Sgk3       | 2510015P2  |
| chr12 | 56089652 | 56089725 | Intergenic | Intergenic | -2365   | NM_01381  | 217578 | Baz1a      | Acf1 B930  |
| chr6  | 1.27E+08 | 1.27E+08 | promoter-1 | promoter-1 | 11      | NM_02535  | 66108  | Ndufa9     | 1010001N1  |
| chr10 | 79446702 | 79446925 | exon (NM_  | exon (NM_  | 262     | NM_00100  | 216157 | Tmem259    | AC087114.  |
| chr6  | 1.17E+08 | 1.17E+08 | Intergenic | (TGG)n Sin | -21512  | NM_17876  | 319776 | Tmem72     | C230095GC  |
| chr11 | 89942177 | 89942450 | Intergenic | Intergenic | 50651   | NM_02643  | 67888  | Tmem100    | 1810057C1  |
| chr3  | 1.3E+08  | 1.3E+08  | promoter-1 | promoter-1 | -237    | NM_02657  | 68147  | Gar1       | AA409823   |
| chr6  | 42662677 | 42663025 | Intergenic | Intergenic | -19793  | NM_02993  | 77574  | Fam115a    | 2810407DC  |
| chr11 | 75545927 | 75547400 | intron (NM | CpG        | 274     | NM_00953  | 22627  | Ywhae      | AU019196   |
| chr9  | 55938052 | 55938225 | 5' UTR (NM | 5' UTR (NM | 355     | NM_01119  | 19200  | Pstpip1    | CD2BP1 de  |
| chr6  | 47762502 | 47762625 | intron (NM | intron (NM | 948     | NM_00978  | 12304  | Pdia4      | AI987846   |
| chr2  | 27940427 | 27940625 | promoter-1 | promoter-1 | -128    | NM_01019  | 14134  | Fcnb       | Fcn2       |
| chr3  | 1.21E+08 | 1.21E+08 | Intergenic | Intergenic | -1467   | NM_01017  | 14066  | F3         | AA409063   |
| chr7  | 3644127  | 3644225  | intron (NM | CpG        | 951     | NM_02993  | 77582  | Mboat7     | 5730589L0  |
| chr19 | 57435602 | 57435700 | promoter-1 | promoter-1 | 152     | NM_14550  | 226252 | Fam160b1   | AI450540   |
| chr17 | 64213702 | 64213825 | intron (NM | CpG        | 433     | NM_00103  | 14158  | Fert2      | AV082135   |
| chr16 | 28894927 | 28895075 | intron (NM | intron (NM | 34783   | NM_17771  | 239796 | Mb21d2     | 1600021P1  |
| chr6  | 53573902 | 53574075 | intron (NM | intron (NM | 50620   | NM_17272  | 231991 | Creb5      | Crebpa D4  |
| chr4  | 41261377 | 41261575 | intron (NM | CpG        | 458     | NM_02689  | 68970  | Dcaf12     | 1500001L2  |
| chr10 | 1.07E+08 | 1.07E+08 | intron (NM | intron (NM | 39427   | NM_00117  | 628870 | Otogl      | EG628870   |
| chr2  | 59603802 | 59604075 | intron (NM | Charlie1a  | 116725  | NM_00115  | 72137  | Wdsub1     | 1700048E1  |
| chr8  | 1.25E+08 | 1.25E+08 | promoter-1 | promoter-1 | -277    | NM_02601  | 67177  | Cdt1       | 2610318F1  |
| chr2  | 62236177 | 62236475 | intron (NM | intron (NM | 13962   | NM_01007  | 13482  | Dpp4       | Cd26 Dpp-  |
| chr10 | 1.28E+08 | 1.28E+08 | Intergenic | Intergenic | -8489   | NM_01027  | 14561  | Gdf11      | BMP-11 Br  |
| chr16 | 17619577 | 17619675 | intron (NM | CpG        | 179     | NM_00116  | 77626  | Smpd4      | 4122402O2  |
| chr1  | 1.83E+08 | 1.83E+08 | intron (NM | intron (NM | 1527    | NM_14479  | 208795 | Tmem63a    | BC014795   |
| chr6  | 1.38E+08 | 1.38E+08 | exon (NM_  | exon (NM_  | 323     | NM_01149  | 20901  | Strap      | AW557906   |
| chr15 | 68089877 | 68090425 | intron (NM | CpG        | 267     | NM_00114  | 380993 | Zfat       | Gm922 Zfa  |
| chr1  | 58659977 | 58660350 | Intergenic | Intergenic | 16720   | NM_02559  | 66495  | Ndufb3     | 27000331   |
| chr8  | 87230777 | 87230850 | 3' UTR (NM | 3' UTR (NM | 5457    | NM_00853  | 17095  | Lyl1       | Lyl-1 bHLH |
| chr2  | 1.67E+08 | 1.67E+08 | promoter-1 | promoter-1 | -54     | NM_02381  | 76367  | Trp53rk    | 2810408M   |
| chr1  | 1.71E+08 | 1.71E+08 | promoter-1 | promoter-1 | -131    | NM_02328  | 66977  | Nuf2       | 2410003CC  |
| chr8  | 74000677 | 74000800 | TTS (NM_0  | TTS (NM_0  | 7645    | NR_122114 | 66498  | Dda1       | 1500034J0  |
| chr2  | 1.19E+08 | 1.19E+08 | exon (NM_  | exon (NM_  | 8248    | NM_17226  | 228545 | Vps18      | 9930024E1  |
| chr1  | 1.57E+08 | 1.57E+08 | Intergenic | Intergenic | -60213  | NM_00978  | 12290  | Cacna1e    | A430040I1  |
| chr7  | 1.4E+08  | 1.4E+08  | Intergenic | Intergenic | -4688   | NM_02960  | 76429  | Lhpp       | 2310007HC  |
| chr10 | 94662277 | 94662500 | intron (NM | intron (NM | 124343  | NM_00995  | 12905  | Cradd      | RAIDD      |
| chr18 | 15733427 | 15733500 | intron (NM | intron (NM | 143092  | NM_19905  | 71367  | Chst9      | 5430438DC  |
| chr4  | 1.29E+08 | 1.29E+08 | Intergenic | Intergenic | -9780   | NM_01689  | 11637  | Ak2        | Ak-2 D4Er1 |
| chr8  | 1.22E+08 | 1.22E+08 | Intergenic | Intergenic | -11661  | NM_02795  | 71839  | Osgin1     | 1700012B1  |
| chr12 | 3832902  | 3832975  | intron (NM | intron (NM | 25778   | NM_00127  | 13435  | Dnmt3a     | MmullIA    |
| chr9  | 1.23E+08 | 1.23E+08 | 3' UTR (NM | 3' UTR (NM | -16768  | NM_01386  | 29806  | Limd1      | AW822033   |
| chrX  | 1.38E+08 | 1.38E+08 | TTS (NM_0  | TTS (NM_0  | 108345  | NM_17487  | 666468 | Atg4a      | AI627006 , |
| chr10 | 93352502 | 93352575 | 5' UTR (NM | 5' UTR (NM | 1409    | NM_01964  | 56307  | Metap2     | 4930584B2  |

|       |          |          |             |             |         |          |        |          |             |
|-------|----------|----------|-------------|-------------|---------|----------|--------|----------|-------------|
| chr2  | 1.68E+08 | 1.68E+08 | promoter-1  | promoter-1  | -47     | NM_01007 | 13480  | Dpm1     | AI118379    |
| chr13 | 16023577 | 16023775 | Intergenic  | Intergenic  | -82632  | NM_00838 | 16323  | Inhba    | -           |
| chr12 | 4937627  | 4937925  | intron (NM  | intron (NM  | 13617   | NM_00109 | 320817 | Atad2b   | 1110014E1   |
| chr6  | 87621877 | 87622000 | exon (NM_   | exon (NM_   | 224     | NM_02425 | 72103  | Aplf     | 2010301NC   |
| chr11 | 74390552 | 74390900 | intron (NM  | intron (NM  | 12934   | NM_00101 | 380711 | Rap1gap2 | AU067654    |
| chr7  | 20085752 | 20085975 | Intergenic  | Intergenic  | 7817    | NM_17769 | 232946 | Bloc1s3  | BC043666    |
| chrX  | 91368127 | 91368950 | 5' UTR (NV  | 5' UTR (NV  | 208     | NM_01176 | 22764  | Zfx      | Zfx5 Zfx5,6 |
| chr7  | 88005302 | 88005525 | Intergenic  | Intergenic  | -1581   | NM_00955 | 22691  | Zscan2   | Zfp-29 Zfp  |
| chr18 | 56591677 | 56591850 | promoter-1  | promoter-1  | -23     | NM_02624 | 107022 | Gramd3   | 9030613F0   |
| chr6  | 88018827 | 88018900 | Intergenic  | L1MB2 LIN   | -15604  | NM_13393 | 103963 | Rpn1     | AU018702    |
| chr16 | 10758727 | 10758900 | Intergenic  | Intergenic  | 26816   | NM_00989 | 12703  | Socs1    | Cish1 Cish' |
| chr1  | 64348477 | 64348550 | Intergenic  | Intergenic  | -180550 | NM_03356 | 93691  | Klf7     | 9830124PC   |
| chr5  | 54500552 | 54500650 | intron (NM  | intron (NM  | 110839  | NM_00108 | 116873 | Stim2    | -           |
| chr9  | 1.2E+08  | 1.2E+08  | intron (NM  | intron (NM  | -76336  | NM_02689 | 68969  | Eif1b    | 1500010M    |
| chr3  | 67234277 | 67234425 | intron (NM  | CpG         | 314     | NM_13859 | 28030  | Gfm1     | AW545374    |
| chr3  | 1.16E+08 | 1.16E+08 | Intergenic  | Intergenic  | -12763  | NM_00117 | 229776 | Cdc14a   | A830059A1   |
| chr11 | 18926702 | 18926825 | Intergenic  | Intergenic  | -7791   | NM_01078 | 17268  | Meis1    | C530044H1   |
| chr12 | 83209177 | 83209300 | Intergenic  | Intergenic  | -61765  | NM_00116 | 217692 | Sipa111  | 4931426N1   |
| chr3  | 1.52E+08 | 1.52E+08 | Intergenic  | Intergenic  | -3321   | NM_00896 | 19220  | Ptgfr    | AI957154 I  |
| chr10 | 94879202 | 94879375 | promoter-1  | promoter-1  | 203     | NM_00770 | 216233 | Socs2    | 8030460M    |
| chr9  | 50643202 | 50643375 | intron (NR_ | intron (NR_ | -21741  | NM_00103 | 73699  | Ppp2r1b  | 2410091NC   |
| chr15 | 81640977 | 81641100 | promoter-1  | promoter-1  | -806    | NM_01737 | 21685  | Tef      | 2310028D2   |
| chr4  | 1.09E+08 | 1.09E+08 | Intergenic  | Intergenic  | -5386   | NM_13388 | 100273 | Osbpl9   | 260001110I  |
| chr2  | 1.67E+08 | 1.67E+08 | Intergenic  | RMER5 LTI   | -9510   | NM_01983 | 56336  | B4galt5  | 943007810'  |
| chr7  | 53423477 | 53423550 | intron (NM  | MTEb LTR    | 11890   | NM_01151 | 20927  | Abcc8    | D930031B2   |
| chr9  | 50287152 | 50287225 | Intergenic  | Intergenic  | -15442  | NM_02963 | 76509  | Plet1    | 0610037B2   |
| chr5  | 1.35E+08 | 1.35E+08 | intron (NM  | intron (NM  | 19728   | NM_00103 | 269713 | Clip2    | B2303270:   |
| chr5  | 1.51E+08 | 1.51E+08 | Intergenic  | Intergenic  | 98038   | NM_08046 | 140498 | Rxfp2    | Gpr106 Gr   |
| chr8  | 1.22E+08 | 1.22E+08 | intron (NM  | intron (NM  | 27766   | NM_02807 | 72042  | Cotl1    | 1810074P2   |
| chr15 | 54921727 | 54921950 | exon (NM_   | exon (NM_   | 195     | NM_18308 | 72107  | Dsccl    | 201000610'  |
| chr7  | 1.46E+08 | 1.46E+08 | Intergenic  | Intergenic  | 35357   | NM_00109 | 101631 | Pwwp2b   | AI594893 I  |
| chr8  | 37677352 | 37677450 | promoter-1  | promoter-1  | -404    | NM_01580 | 50768  | Dlc1     | A730069NC   |
| chr9  | 55314602 | 55314800 | intron (NM  | intron (NM  | 45349   | NM_14561 | 110842 | Etfa     | 201020012:  |
| chr12 | 78208327 | 78208525 | Intergenic  | Intergenic  | -130665 | NM_00125 | 53618  | Fut8     | -           |
| chr5  | 1.24E+08 | 1.24E+08 | intron (NM  | intron (NM  | 7718    | NM_17787 | 330192 | Vps37b   | 2300007F2   |
| chr6  | 67019202 | 67019500 | intron (NR_ | Lx5 LINE L  | -31950  | NM_00783 | 13197  | Gadd45a  | AA545191    |
| chr9  | 50469602 | 50469875 | Intergenic  | Intergenic  | -1853   | NM_14561 | 235339 | Dlat     | 6332404GC   |
| chr1  | 1.84E+08 | 1.84E+08 | promoter-1  | promoter-1  | -176    | NM_17512 | 67948  | Fbxo28   | 4833428J1'  |
| chr5  | 1.31E+08 | 1.31E+08 | intron (NM  | CpG         | 283     | NM_02785 | 71667  | Tmem248  | 0610007L0   |
| chr5  | 68237502 | 68237625 | intron (NM  | intron (NM  | 1107    | NM_00128 | 11980  | Atp8a1   | AI481521 ,  |
| chr2  | 28980152 | 28980225 | promoter-1  | promoter-1  | -324    | NM_19803 | 269254 | Setx     | A130090NC   |
| chr8  | 74195202 | 74195375 | intron (NM  | CpG         | 368     | NM_00102 | 382018 | Unc13a   | 2410078GC   |
| chr9  | 20532177 | 20532300 | intron (NM  | CpG         | 420     | NM_17377 | 244723 | Olfm2    | A030009AC   |
| chr15 | 8747952  | 8748175  | Intergenic  | L1MA6 LIN   | -87256  | NM_14893 | 20512  | Slc1a3   | AI504299 I  |
| chr2  | 72039752 | 72039850 | intron (NM  | intron (NM  | -83893  | NM_02305 | 65964  | Zak      | AV006891    |
| chr5  | 1.14E+08 | 1.14E+08 | promoter-1  | promoter-1  | -303    | NM_00101 | 231630 | Ficd     | D5Ert40e    |
| chr9  | 21706027 | 21706150 | Intergenic  | LTR33A LT   | 16477   | NM_03187 | 19340  | Rab3d    | C130057E1   |



|       |          |          |            |            |         |           |        |            |            |
|-------|----------|----------|------------|------------|---------|-----------|--------|------------|------------|
| chr15 | 1.01E+08 | 1.01E+08 | intron (NM | intron (NM | 50399   | NM_01132  | 20273  | Scn8a      | AI853486 I |
| chr10 | 41170352 | 41170475 | intron (NM | CpG        | 249     | NR_102360 | 268294 | Zbtb24     | BC055367   |
| chr1  | 1.65E+08 | 1.65E+08 | intron (NM | CpG        | 324     | NM_00108  | 226562 | Prrc2c     | 1810043M   |
| chr11 | 86923427 | 86923550 | intron (NM | intron (NM | 725     | NM_02537  | 66140  | Ska2       | 1110001AC  |
| chr1  | 64173252 | 64174200 | Intergenic | Intergenic | -5763   | NM_03356  | 93691  | Klf7       | 9830124PC  |
| chr1  | 87637627 | 87637850 | Intergenic | Intergenic | -4557   | NM_17705  | 319997 | A630001G:- |            |
| chr6  | 1.25E+08 | 1.25E+08 | Intergenic | Intergenic | -12508  | NM_01353  | 14794  | Spsb2      | AI461677 I |
| chr2  | 1.65E+08 | 1.65E+08 | intron (NM | intron (NM | 1574    | NM_17837  | 67538  | Zswim3     | 4921517AC  |
| chr15 | 80504302 | 80504375 | intron (NM | intron (NM | 2061    | NM_14598  | 213956 | Fam83f     | AW544981   |
| chr9  | 96532152 | 96532375 | promoter-1 | promoter-1 | -341    | NM_05326  | 114713 | Rasa2      | 5430433H2  |
| chr1  | 4797927  | 4798175  | promoter-1 | promoter-1 | 77      | NM_00886  | 18777  | Lypla1     | Pla1a      |
| chr1  | 1.73E+08 | 1.73E+08 | exon (NM_  | exon (NM_  | 195     | NM_02317  | 80915  | Dusp12     | 1190004O1  |
| chr7  | 35175902 | 35176050 | Intergenic | L2a LINE L | -1417   | NM_02594  | 67070  | Lsm14a     | 2700023B1  |
| chr8  | 12514327 | 12514475 | Intergenic | Intergenic | -58648  | NM_02427  | 78634  | Spaca7     | 1700094CC  |
| chr8  | 32279377 | 32279775 | promoter-1 | promoter-1 | -380    | NM_02645  | 67920  | Mak16      | 2600016BC  |
| chr5  | 98460052 | 98460150 | promoter-1 | promoter-1 | -120    | NM_13373  | 71914  | Antxr2     | 2310046B1  |
| chr3  | 1.01E+08 | 1.01E+08 | Intergenic | Intergenic | -1258   | NM_00116  | 630146 | Cd101      | Gm1016 G   |
| chr4  | 3948252  | 3948325  | Intergenic | Intergenic | -1478   | NM_18198  | 242285 | Sdr16c5    | Rdhe2 Scd  |
| chr4  | 97010152 | 97010350 | Intergenic | Intergenic | -238383 | NM_00112  | 18027  | Nfia       | 1110047K1  |
| chr11 | 68829602 | 68829750 | intron (NM | intron (NM | 263     | NM_00101  | 68964  | Ctc1       | 1500010J0  |
| chr11 | 77029827 | 77029900 | promoter-1 | promoter-1 | -64     | NM_17771  | 237860 | Ssh2       | SSH-2 SSH  |
| chr3  | 1.26E+08 | 1.26E+08 | intron (NM | Lx6 LINE L | 15844   | NM_02381  | 108058 | Camk2d     | 2810011D2  |
| chr4  | 24661102 | 24661175 | intron (NM | intron (NM | 117095  | NM_00116  | 212390 | Klhl32     | 6430524HC  |
| chr10 | 39112377 | 39112450 | intron (NM | intron (NM | 22808   | NM_00112  | 14360  | Fyn        | AI448320 I |
| chr3  | 95454852 | 95454925 | Intergenic | Intergenic | -7755   | NM_00856  | 17210  | Mcl1       | AW556805   |
| chr8  | 74844152 | 74844225 | intron (NM | PB1D7 SIN  | 1227    | NM_00845  | 16598  | Klf2       | Lkif       |
| chr3  | 1.15E+08 | 1.15E+08 | Intergenic | Intergenic | -45383  | NM_15345  | 229759 | Olfm3      | B230206GC  |
| chr1  | 5073102  | 5073175  | promoter-1 | promoter-1 | -116    | NM_13382  | 108664 | Atp6v1h    | 0710001F1  |
| chr6  | 86321602 | 86321675 | intron (NM | CpG        | 104     | NM_02650  | 68011  | Snrpg      | 2810024K1  |
| chr7  | 28114602 | 28114700 | exon (NM_  | exon (NM_  | 4016    | NM_00111  | 108075 | Ltbp4      | 2310046A1  |
| chr17 | 34067152 | 34067275 | TTS (NM_0  | TTS (NM_0  | 374     | NM_00905  | 19732  | Rgl2       | KE1.5 Rab  |
| chr3  | 1.16E+08 | 1.16E+08 | intron (NM | intron (NM | 5730    | NM_01169  | 22329  | Vcam1      | CD106 Vca  |
| chr11 | 78311427 | 78311500 | promoter-1 | promoter-1 | -207    | NM_17279  | 237868 | Sarm1      | A83009111  |
| chr8  | 87225027 | 87225175 | promoter-1 | promoter-1 | -255    | NM_00853  | 17095  | Lyl1       | Lyl-1 bHLH |
| chr8  | 92186302 | 92186600 | Intergenic | Intergenic | -618390 | NM_02139  | 58198  | Sall1      | Msal-3     |
| chr17 | 44376952 | 44377025 | intron (NM | intron (NM | 51467   | NM_17262  | 224796 | Clic5      | 5730531E1  |
| chr13 | 95055502 | 95055675 | promoter-1 | promoter-1 | -352    | NM_02915  | 107767 | Scamp1     | 4930505M   |
| chr4  | 1.09E+08 | 1.09E+08 | Intergenic | Intergenic | 8889    | NM_00767  | 12580  | Cdkn2c     | C77269 IN  |
| chr19 | 53268577 | 53269050 | intron (NM | intron (NM | 50326   | NM_01375  | 27360  | Add3       | AI463285 I |
| chr3  | 27576552 | 27576750 | intron (NM | intron (NM | 32710   | NM_17318  | 72007  | Fndc3b     | 1600019OC  |
| chr4  | 1.41E+08 | 1.41E+08 | intron (NM | CpG        | 473     | NR_102344 | 213491 | Szrd1      | 111002210: |
| chr2  | 31940127 | 31940325 | Intergenic | CpG        | -1001   | NM_17551  | 241303 | Fam78a     | A130092J0  |
| chr6  | 47762952 | 47763100 | intron (NM | intron (NM | 485     | NM_00978  | 12304  | Pdia4      | AI987846 I |
| chr4  | 1.51E+08 | 1.51E+08 | exon (NM_  | exon (NM_  | 426     | NM_00103  | 242785 | Klhl21     | 1810045KC  |
| chr14 | 55483327 | 55483425 | promoter-1 | promoter-1 | -381    | NM_00117  | 239099 | Homez      | mKIAA144:  |
| chrX  | 1.49E+08 | 1.49E+08 | Intergenic | Intergenic | -24151  | NM_00119  | 635396 | Gm7157     | -          |
| chr18 | 24762027 | 24762250 | promoter-1 | promoter-1 | 180     | NM_13914  | 106957 | Slc39a6    | Ermelin    |

|       |          |          |            |            |        |          |        |           |             |
|-------|----------|----------|------------|------------|--------|----------|--------|-----------|-------------|
| chr3  | 65761077 | 65761375 | intron (NM | intron (NM | 921    | NM_01993 | 56706  | Ccn1l     | 2610030E2   |
| chr1  | 58773127 | 58773275 | intron (NM | intron (NM | 3071   | NM_20765 | 12633  | Cflar     | 2310024N1   |
| chr7  | 20300502 | 20300650 | exon (NM_  | exon (NM_  | 202    | NM_00110 | 53333  | Tomm40    | AW539759    |
| chr5  | 1.06E+08 | 1.06E+08 | promoter-1 | promoter-1 | 0      | NM_00112 | 231549 | Lrrc8d    | 2810473GC   |
| chr9  | 59334202 | 59334350 | promoter-1 | promoter-1 | -95    | NM_01992 | 23806  | Arih1     | AU021774    |
| chr15 | 1.02E+08 | 1.02E+08 | intron (NM | CpG        | 226    | NM_13410 | 106073 | Mfsd5     | AA409375    |
| chr2  | 69700227 | 69700300 | intron (NM | intron (NM | 644    | NM_00927 | 20823  | Ssb       | SS-B        |
| chr10 | 79724352 | 79724575 | promoter-1 | promoter-1 | -750   | NM_01025 | 14431  | Gamt      | AA571402    |
| chr2  | 3575002  | 3575350  | Intergenic | Intergenic | -55554 | NM_02562 | 66540  | Fam107b   | 3110001A1   |
| chr4  | 46178777 | 46178875 | intron (NM | intron (NM | 27443  | NM_00103 | 433702 | Ncbp1     | AU014645    |
| chr14 | 14845202 | 14845650 | intron (NM | CpG        | 421    | NM_13922 | 246103 | Atxn7     | A430107N:   |
| chr13 | 99798577 | 99798725 | Intergenic | ORR1D1 L'  | -44131 | NM_02706 | 69382  | 1700024PC | H2bl1 Sub   |
| chr7  | 1.23E+08 | 1.23E+08 | Intergenic | (CA)n Simf | -32533 | NM_17274 | 233765 | Plekha7   | A430081P2   |
| chr15 | 88692077 | 88692400 | promoter-1 | promoter-1 | -386   | NM_14547 | 223775 | Pim3      | BC026639    |
| chr12 | 77478277 | 77478425 | intron (NM | intron (NM | 7098   | NM_17874 | 268564 | Zbtb1     | 9430077A1   |
| chr4  | 1.02E+08 | 1.02E+08 | intron (NM | intron (NM | -56964 | NM_00117 | 18578  | Pde4b     | Dpde4 R7z   |
| chr1  | 62771702 | 62772050 | intron (NM | intron (NM | 21985  | NM_00107 | 18187  | Nrp2      | 1110048PC   |
| chr7  | 1.05E+08 | 1.05E+08 | promoter-1 | promoter-1 | -489   | NM_02540 | 66190  | Acer3     | 1110057L1   |
| chrX  | 72759727 | 72759825 | intron (NM | intron (NM | 140    | NM_01169 | 22327  | Vbp1      | -           |
| chr1  | 59628402 | 59628650 | intron (NM | intron (NM | 55418  | NM_00101 | 381260 | Gm973     | AW554518    |
| chrY  | 2862577  | 2862750  | Intergenic | Intergenic | 475405 | NM_00127 | 1E+08  | Gm3376    | Rbmy1b      |
| chr4  | 70207002 | 70207500 | Intergenic | RMER15-in  | -11289 | NM_17269 | 230316 | Megf9     | 4933405H1   |
| chr2  | 24173502 | 24173725 | Intergenic | Intergenic | -18767 | NM_03116 | 16181  | Il1rn     | F630041P1   |
| chr3  | 1.31E+08 | 1.31E+08 | 5' UTR (NM | 5' UTR (NM | 119    | NM_01186 | 23971  | Papss1    | AI325286 ,  |
| chr1  | 1.87E+08 | 1.87E+08 | Intergenic | Intergenic | -50023 | NM_14551 | 226778 | Mark1     | AW491150    |
| chr11 | 32442152 | 32442300 | intron (NM | intron (NM | 8960   | NM_00928 | 20868  | Stk10     | Gek1 Lok    |
| chr7  | 20189127 | 20189350 | intron (NM | intron (NM | 579    | NM_01668 | 53609  | Clasrp    | Clasp Sfrs1 |
| chr19 | 10956152 | 10956625 | promoter-1 | promoter-1 | -155   | NM_13414 | 68539  | Tmem109   | 11100061!   |
| chr14 | 58505852 | 58505950 | intron (NM | ID4_ SINE  | 3198   | NM_02949 | 75965  | Zdhhc20   | 5033406L1   |
| chr2  | 1.29E+08 | 1.29E+08 | intron (NM | CpG        | 293    | NM_00856 | 17222  | Anapc1    | 2610021OC   |
| chr4  | 45421227 | 45421425 | intron (NM | CpG        | 312    | NM_00100 | 230125 | Slc25a51  | 9130208E0   |
| chr8  | 86266227 | 86266525 | Intergenic | Intergenic | -1166  | NM_00116 | 26364  | Cd97      | AA409984    |
| chr11 | 82804727 | 82804825 | intron (NM | intron (NM | 556    | NM_17279 | 237886 | Sfn9      | 9830137M    |
| chr17 | 8072552  | 8072775  | Intergenic | Intergenic | -46202 | NM_14596 | 72536  | Tagap     | 2610315E1   |
| chr2  | 72392927 | 72393075 | Intergenic | Intergenic | 78725  | NM_02586 | 66953  | Cdca7     | 2310021GC   |
| chr5  | 1.14E+08 | 1.14E+08 | promoter-1 | promoter-1 | -283   | NM_02552 | 66383  | Iscu      | 2310020H2   |
| chr12 | 76919402 | 76919675 | intron (NM | CpG        | 233    | NM_00100 | 319565 | Syne2     | 6820443OC   |
| chr13 | 96152502 | 96152750 | Intergenic | Intergenic | -7314  | NM_02563 | 66549  | Aggf1     | 2010009L1   |
| chr13 | 32925302 | 32925425 | Intergenic | Intergenic | 17691  | NM_02542 | 66222  | Serpinb1a | 1190005M    |
| chr7  | 90014402 | 90014525 | Intergenic | CpG        | -1380  | NM_17536 | 108797 | Mex3b     | 4931439AC   |
| chr9  | 65908177 | 65908250 | intron (NM | CpG        | 237    | NM_01114 | 19035  | Ppib      | AA408962    |
| chr15 | 27560227 | 27560350 | exon (NM_  | exon (NM_  | 160    | NM_00101 | 432940 | Otulin    | C79097 Fa   |
| chr1  | 82313177 | 82313625 | intron (NM | CpG        | 247    | NM_02977 | 76867  | Rhbdd1    | 4930418PC   |
| chr18 | 57195452 | 57195825 | Intergenic | L1MC1 LIN  | -60605 | NM_02990 | 77422  | C330018Dz | AU018666    |
| chr10 | 75931352 | 75931950 | promoter-1 | promoter-1 | -65    | NM_01943 | 54387  | Mcm3ap    | GANP mKI    |
| chr5  | 1.44E+08 | 1.44E+08 | promoter-1 | promoter-1 | 178    | NM_02132 | 57782  | Rbak      | -           |
| chr6  | 39726252 | 39726700 | Intergenic | L1MA9 LIN  | 34459  | NM_01027 | 14548  | Mrps33    | AI841153 l  |

|       |          |          |             |             |         |          |        |            |            |
|-------|----------|----------|-------------|-------------|---------|----------|--------|------------|------------|
| chr16 | 23518927 | 23519200 | intron (NM  | intron (NM  | 1600    | NM_00855 | 17174  | Masp1      | AW048060   |
| chr9  | 56978252 | 56978450 | promoter-1  | promoter-1  | -233    | NM_02863 | 73744  | Man2c1     | 1110025H2  |
| chr19 | 4191477  | 4191700  | promoter-1  | promoter-1  | -541    | NM_17865 | 108995 | Tbc1d10c   | 1810062O1  |
| chr11 | 1.19E+08 | 1.19E+08 | intron (NM  | CpG         | 256     | NM_13866 | 192170 | Eif4a3     | 2400003OC  |
| chr13 | 41562177 | 41562525 | intron (NM  | intron (NM  | 20378   | NM_00111 | 18003  | Nedd9      | Cas-L CasL |
| chr9  | 1.2E+08  | 1.2E+08  | Intergenic  | ORR1E LTF   | -52828  | NM_14455 | 245049 | Myrip      | A230081N:  |
| chr15 | 81229752 | 81229825 | promoter-1  | promoter-1  | 336     | NM_13372 | 70356  | St13       | 1110007IO: |
| chr2  | 30141577 | 30141675 | promoter-1  | promoter-1  | 248     | NM_17764 | 227697 | Dolk       | BC026973   |
| chr7  | 1.06E+08 | 1.06E+08 | Intergenic  | Intergenic  | -18609  | NM_00128 | 22411  | Wnt11      | -          |
| chr10 | 42955702 | 42955825 | intron (NM  | intron (NM  | 14471   | NM_00116 | 71365  | Pdss2      | 5430420PC  |
| chr7  | 26212177 | 26212425 | intron (NR_ | intron (NR_ | -14396  | NM_15357 | 232983 | Cxcl17     | VCC-1 Vcc: |
| chr1  | 1.37E+08 | 1.37E+08 | intron (NM  | intron (NM  | 1598    | NM_14541 | 215615 | Rnpep      | -          |
| chr6  | 1.16E+08 | 1.16E+08 | Intergenic  | ID_B1 SINf  | -18765  | NM_02637 | 67784  | Plxnd1     | 6230425C2  |
| chr1  | 1.53E+08 | 1.53E+08 | intron (NM  | CpG         | 127     | NM_01127 | 19821  | Rnf2       | AI326319 , |
| chr4  | 1.29E+08 | 1.29E+08 | promoter-1  | promoter-1  | -69     | NM_19930 | 230770 | Tmem39b    | 6330509E0  |
| chr6  | 53058277 | 53058475 | Intergenic  | MurERV4-i   | -39758  | NM_17340 | 231986 | Jazf1      | AI591476 f |
| chr16 | 38376402 | 38376850 | intron (NM  | intron (NM  | 14330   | NM_02231 | 64082  | Popdc2     | AV006127   |
| chr4  | 1.23E+08 | 1.23E+08 | intron (NM  | intron (NM  | -3628   | NM_18185 | 353371 | Oxct2b     | Scot-t2    |
| chr3  | 1.58E+08 | 1.58E+08 | exon (NM_   | exon (NM_   | 292     | NM_00109 | 69207  | Srsf11     | 0610009JO  |
| chr9  | 1.03E+08 | 1.03E+08 | promoter-1  | promoter-1  | -392    | NM_00113 | 321022 | Cdv3       | 2510010F1  |
| chr11 | 57917752 | 57917875 | intron (NM  | CpG         | 158     | NM_02694 | 69125  | Cnot8      | 1500015IO  |
| chr19 | 12085027 | 12085100 | Intergenic  | Intergenic  | 26167   | NM_14668 | 258675 | Olfr1423   | MOR239-3   |
| chr16 | 57606702 | 57606875 | exon (NM_   | exon (NM_   | 192     | NM_02559 | 66497  | Cmss1      | 1110001AC  |
| chr4  | 1.29E+08 | 1.29E+08 | intron (NM  | CpG         | 210     | NM_00846 | 16650  | Kpna6      | IPOA7 Kpn  |
| chr15 | 1E+08    | 1E+08    | promoter-1  | promoter-1  | -622    | NM_02733 | 70152  | Mettl7a1   | 2210414H1  |
| chr16 | 35932427 | 35932550 | exon (NM_   | exon (NM_   | -6068   | NM_03025 | 80285  | Parp9      | ARTD9 AW   |
| chr10 | 1.27E+08 | 1.27E+08 | Intergenic  | MTD LTR f   | -15322  | NM_00117 | 216440 | Os9        | 4632413K1  |
| chr3  | 27689977 | 27690175 | Intergenic  | Intergenic  | -80715  | NM_17318 | 72007  | Fndc3b     | 1600019OC  |
| chr1  | 63873052 | 63873200 | Intergenic  | Intergenic  | -57285  | NM_00125 | 74426  | 4933402D2- | -          |
| chr7  | 1.34E+08 | 1.34E+08 | Intergenic  | L3 LINE Cf  | -13139  | NM_01195 | 26417  | Mapk3      | Erk-1 Erk1 |
| chr19 | 47605777 | 47605850 | intron (NM  | intron (NM  | 5697    | NM_17536 | 108689 | Obfc1      | 0610009H2  |
| chr17 | 66868877 | 66869025 | promoter-1  | promoter-1  | 59      | NM_02444 | 19328  | Rab12      | 2900054P1  |
| chr1  | 51641727 | 51641875 | Intergenic  | LTR82B Lo   | -106558 | NM_02869 | 109019 | Nabp1      | 4930434HC  |
| chr7  | 16881902 | 16882000 | Intergenic  | Intergenic  | -9807   | NM_00113 | 243846 | Ccdc9      | 2600011LO  |
| chr10 | 79565052 | 79565175 | intron (NM  | CpG         | 334     | NM_18342 | 216161 | Sbno2      | BC019206   |
| chr2  | 1.65E+08 | 1.65E+08 | Intergenic  | Intergenic  | -4931   | NM_01359 | 17395  | Mmp9       | AW743869   |
| chr1  | 53397902 | 53398100 | Intergenic  | Intergenic  | 11595   | NM_00129 | 70396  | Asnsd1     | 2210409M   |
| chr1  | 1.83E+08 | 1.83E+08 | promoter-1  | promoter-1  | 44      | NM_14594 | 208768 | Sde2       | -          |
| chr4  | 1.55E+08 | 1.55E+08 | Intergenic  | Intergenic  | -12532  | NM_01138 | 20481  | Ski        | 2310012IO: |
| chr13 | 74660377 | 74660525 | Intergenic  | Intergenic  | -29053  | NM_14623 | 235956 | Zfp825     | -          |
| chr11 | 54615502 | 54615750 | Intergenic  | Intergenic  | -14421  | NM_17862 | 72729  | Cdc42se2   | 2810404F1  |
| chr6  | 1.49E+08 | 1.49E+08 | Intergenic  | Intergenic  | -55629  | NM_00111 | 232566 | Amn1       | 5830467E0  |
| chr1  | 1.67E+08 | 1.67E+08 | promoter-1  | promoter-1  | -201    | NM_02743 | 70456  | Mpc2       | 0610006CC  |
| chr5  | 91326377 | 91326450 | Intergenic  | Intergenic  | 6142    | NM_00817 | 14825  | Cxcl1      | Fsp Gro1 f |
| chr6  | 1.17E+08 | 1.17E+08 | promoter-1  | promoter-1  | -68     | NM_02605 | 67255  | Zfp422     | 2900028O2  |
| chr8  | 1.14E+08 | 1.14E+08 | intron (NM  | CpG         | 208     | NM_01174 | 22640  | Zfp1       | Fnp-1 Zfp- |
| chr8  | 1.27E+08 | 1.27E+08 | intron (NM  | intron (NM  | 33857   | NM_19863 | 330863 | Trim67     | D130049O:  |

|       |          |          |             |             |         |           |        |          |            |
|-------|----------|----------|-------------|-------------|---------|-----------|--------|----------|------------|
| chr2  | 1.67E+08 | 1.67E+08 | Intergenic  | Intergenic  | 42754   | NM_02323  | 66589  | Ube2v1   | 0610011J0  |
| chr2  | 38920777 | 38921125 | TTS (NM_1   | TTS (NM_1   | 110     | NR_110968 | 76899  | Golga1   | 0710001G0  |
| chr9  | 85368877 | 85369075 | Intergenic  | Intergenic  | -148219 | NM_00116  | 212943 | Fam46a   | D930050G0  |
| chr1  | 1.93E+08 | 1.93E+08 | intron (NM  | intron (NM  | 832     | NM_02586  | 66950  | Tmem206  | 2310028N0  |
| chr7  | 13420352 | 13420550 | 5' UTR (NV  | 5' UTR (NV  | 292     | NM_02298  | 65020  | Zfp110   | 2900024E0  |
| chr5  | 73647427 | 73647675 | intron (NM  | CpG         | 306     | NM_02819  | 72313  | Fryl     | 2010313D2  |
| chr16 | 5050352  | 5050525  | promoter-1  | promoter-1  | 277     | NM_02666  | 170644 | Ubn1     | 1110029L1  |
| chr17 | 34574127 | 34574400 | intron (NM  | intron (NM  | 38498   | NM_00116  | 407788 | BC051142 | NG8 TSBP   |
| chr2  | 1.31E+08 | 1.31E+08 | intron (NM  | intron (NM  | 26531   | NM_00973  | 11990  | Atrn     | AW558010   |
| chr2  | 1.34E+08 | 1.34E+08 | Intergenic  | RLTR45 LT   | 322856  | NM_00755  | 12156  | Bmp2     | AI467020 I |
| chr12 | 8680677  | 8680925  | promoter-1  | promoter-1  | -139    | NM_00116  | 80913  | Pum2     | 5730503J2  |
| chr11 | 1.09E+08 | 1.09E+08 | intron (NM  | intron (NM  | -21978  | NM_00102  | 104681 | Slc16a6  | AW743111   |
| chr12 | 85189677 | 85189875 | intron (NR_ | intron (NR_ | -6468   | NM_01094  | 18222  | Numb     | Nb         |
| chr16 | 43979777 | 43980125 | promoter-1  | promoter-1  | -788    | NM_00100  | 332175 | Zdhhc23  | Gm1751 G   |
| chr10 | 75322677 | 75322750 | intron (NM  | CpG-1163    | 282     | NM_01079  | 17319  | Mif      | GIF Glif   |
| chr6  | 28347077 | 28347200 | Intergenic  | Intergenic  | 24586   | NM_02890  | 74375  | Gcc1     | 4932417PC  |
| chr8  | 80327102 | 80327225 | Intergenic  | Intergenic  | -78812  | NM_01033  | 13617  | Ednra    | ET-AR ETa  |
| chr19 | 40662402 | 40662500 | intron (NM  | intron (NM  | 502     | NM_01969  | 56454  | Aldh18a1 | 2810433KC  |
| chr19 | 34273352 | 34273650 | intron (NM  | intron (NM  | 6741    | NM_02968  | 76630  | Stambpl1 | 1700095N2  |
| chr2  | 1.32E+08 | 1.32E+08 | intron (NM  | intron (NM  | 49906   | NM_01882  | 54338  | Slc23a2  | AI844736 I |
| chr11 | 1.16E+08 | 1.16E+08 | intron (NM  | intron (NM  | 828     | NM_00116  | 217344 | Rhbdf2   | 47324651   |
| chr3  | 1.29E+08 | 1.29E+08 | intron (NM  | intron (NM  | 36779   | NM_00793  | 13809  | Enpep    | 6030431M   |
| chr2  | 1.32E+08 | 1.32E+08 | Intergenic  | Intergenic  | -35694  | NM_01882  | 54338  | Slc23a2  | AI844736 I |
| chr10 | 1.21E+08 | 1.21E+08 | Intergenic  | L1MB7 LIN   | -34105  | NM_17302  | 270802 | BC048403 | E030027L1  |
| chr7  | 71134902 | 71135150 | Intergenic  | MTC LTR I   | -51225  | NM_02136  | 50794  | Klf13    | 0610043C1  |
| chr4  | 1.25E+08 | 1.25E+08 | Intergenic  | Intergenic  | -137926 | NM_15315  | 230738 | Zc3h12a  | BC036563   |
| chr2  | 90938302 | 90938575 | intron (NM  | intron (NM  | 1484    | NM_01135  | 20375  | Spi1     | Dis-1 Dis1 |
| chr1  | 1.33E+08 | 1.33E+08 | 3' UTR (NV  | 3' UTR (NV  | 25192   | NM_01070  | 16865  | Eif2d    | D1ErtD5e I |
| chr9  | 66222777 | 66222900 | intron (NM  | intron (NM  | 24581   | NM_14561  | 235439 | Herc1    | 2810449H1  |
| chr13 | 1.03E+08 | 1.03E+08 | Intergenic  | Lx8 LINE L  | -248516 | NM_00107  | 18708  | Pik3r1   | PI3K p50a  |
| chr2  | 48804377 | 48804675 | promoter-1  | promoter-1  | 261     | NM_00117  | 26428  | Orc4     | Orc4P Orc  |
| chr1  | 90072627 | 90072875 | intron (NM  | RMER16-in   | 10164   | NM_20164  | 394433 | Ugt1a5   | -          |
| chr6  | 53427652 | 53427775 | Intergenic  | Intergenic  | -95655  | NM_17272  | 231991 | Creb5    | Crebpa D4  |
| chr6  | 4852727  | 4853025  | promoter-1  | promoter-1  | -444    | NM_18159  | 243725 | Ppp1r9a  | 2810430P2  |
| chr1  | 1.69E+08 | 1.69E+08 | intron (NM  | intron (NM  | 37995   | NM_03072  | 80914  | Uck2     | AA407809   |
| chr8  | 72876577 | 72876650 | intron (NM  | intron (NM  | 559     | NM_03068  | 19704  | Upf1     | B430202H1  |
| chr1  | 90551552 | 90551750 | Intergenic  | Intergenic  | 47115   | NM_17730  | 320982 | Arl4c    | A630084M   |
| chr7  | 52309027 | 52309225 | promoter-1  | promoter-1  | -875    | NM_17502  | 233210 | Prr12    | 6720469B1  |
| chr7  | 24974127 | 24974275 | Intergenic  | Intergenic  | 14137   | NM_00102  | 232966 | Zfp114   | Gm1957 Z   |
| chr2  | 91284452 | 91284600 | intron (NM  | intron (NM  | 273     | NM_17512  | 228356 | 1110051M | AI586322   |
| chr11 | 1.02E+08 | 1.02E+08 | intron (NM  | CpG-2660    | 409     | NM_01155  | 21429  | Ubtf     | A930005G0  |
| chr9  | 25311752 | 25312000 | intron (NM  | intron (NM  | 22694   | NM_02618  | 67484  | Eepd1    | 2310005PC  |
| chr7  | 71432077 | 71432450 | promoter-1  | promoter-1  | -293    | NM_17274  | 233315 | Mtmr10   | BB128963   |
| chr9  | 57369277 | 57369350 | intron (NM  | CpG         | 274     | NM_00774  | 12858  | Cox5a    | AA959768   |
| chr1  | 59820402 | 59821050 | promoter-1  | promoter-1  | -397    | NM_00756  | 12168  | Bmpr2    | 2610024H2  |
| chr2  | 35360727 | 35360800 | Intergenic  | ORR1A1 L1   | -43818  | NM_00114  | 14594  | Ggta1    | AW108479   |
| chr14 | 73801227 | 73801400 | Intergenic  | Intergenic  | -16235  | NM_00841  | 16432  | Itm2b    | AI256040 I |

|       |          |          |            |            |         |          |        |            |            |
|-------|----------|----------|------------|------------|---------|----------|--------|------------|------------|
| chr1  | 1.58E+08 | 1.58E+08 | promoter-1 | promoter-1 | -255    | NM_00959 | 11352  | Abl2       | AA536808   |
| chr11 | 76759402 | 76759550 | intron (NM | CpG        | 318     | NM_17864 | 104184 | Blmh       | AI035728 I |
| chr6  | 1.13E+08 | 1.13E+08 | intron (NM | intron (NM | 533     | NM_00103 | 101122 | Rpusd3     | AI527266   |
| chr8  | 35869702 | 35870200 | promoter-1 | promoter-1 | -713    | NM_17693 | 319520 | Dusp4      | 2700078F2  |
| chr14 | 97437502 | 97437625 | Intergenic | Intergenic | -519310 | NM_05310 | 93688  | Klhl1      | mKIAA149(  |
| chr11 | 84795727 | 84795850 | Intergenic | Intergenic | 24532   | NM_00760 | 12351  | Car4       | AW456718   |
| chr1  | 1.58E+08 | 1.58E+08 | promoter-1 | promoter-1 | 44      | NM_00116 | 240832 | Tor1aip2   | 1110020D1  |
| chr4  | 1.35E+08 | 1.35E+08 | TTS (NM_0  | TTS (NM_0  | 35384   | NM_00101 | 230824 | Grhl3      | AI561912 I |
| chr10 | 98191077 | 98191350 | Intergenic | Intergenic | -186573 | NM_02648 | 67972  | Atp2b1     | 2810442I2: |
| chr3  | 1.58E+08 | 1.58E+08 | intron (NM | intron (NM | 165642  | NM_00128 | 67144  | Lrrc40     | 2610040E1  |
| chr15 | 38447827 | 38447900 | intron (NM | intron (NM | 1158    | NM_00110 | 54375  | Azin1      | 1700085L0  |
| chr8  | 1.24E+08 | 1.24E+08 | intron (NM | CpG        | 346     | NM_00128 | 53325  | Banp       | AA408158   |
| chr5  | 97360627 | 97360925 | Intergenic | Intergenic | -65932  | NM_08070 | 140780 | Bmp2k      | 4933417M   |
| chr4  | 1.45E+08 | 1.45E+08 | Intergenic | Intergenic | -20878  | NM_01161 | 21938  | Tnfrsf1b   | CD120b TF  |
| chr13 | 9878177  | 9878275  | exon (NM_  | exon (NM_  | -113666 | NM_14451 | 66505  | Zmynd11    | 2210402G2  |
| chr10 | 76722127 | 76722225 | promoter-1 | promoter-1 | 131     | NM_03026 | 80294  | Pofut2     | 2310011G2  |
| chr17 | 37088577 | 37088725 | promoter-1 | promoter-1 | 86      | NM_02963 | 76497  | Ppp1r11    | 1500041BC  |
| chr17 | 64212602 | 64213150 | promoter-1 | promoter-1 | -454    | NM_00103 | 14158  | Fert2      | AV082135   |
| chr5  | 1.21E+08 | 1.21E+08 | promoter-1 | promoter-1 | 37      | NM_02804 | 71990  | Ddx54      | 2410015A1  |
| chrX  | 55449452 | 55449675 | Intergenic | Intergenic | 165758  | NM_00957 | 22773  | Zic3       | Bn Ka      |
| chr1  | 95187652 | 95187925 | intron (NM | intron (NM | 14659   | NM_17805 | 69821  | Mterf4     | 1810059A2  |
| chr5  | 1.39E+08 | 1.39E+08 | TTS (NM_1  | TTS (NM_1  | 471     | NM_17787 | 330216 | Mblac1     | -          |
| chr6  | 18537552 | 18537925 | Intergenic | Intergenic | -72913  | NM_08028 | 30785  | Cttnbp2    | 3010022N2  |
| chr1  | 7766727  | 7767225  | Intergenic | RMER17A-i  | 687975  | NM_18302 | 319263 | Pcmt1      | 8430411F1  |
| chr2  | 1.53E+08 | 1.53E+08 | intron (NM | intron (NM | 728     | NM_00127 | 13436  | Dnmt3b     | MmullIB    |
| chr1  | 1.68E+08 | 1.68E+08 | promoter-1 | promoter-1 | -686    | NM_01113 | 18986  | Pou2f1     | 2810482HC  |
| chr17 | 29090977 | 29091075 | intron (NM | intron (NM | 865     | NM_02588 | 66989  | Kctd20     | 2410004N1  |
| chr4  | 94717977 | 94718225 | 5' UTR (NV | 5' UTR (NV | 812     | NM_01059 | 16476  | Jun        | AP-1 Junc  |
| chr4  | 1.55E+08 | 1.55E+08 | intron (NM | CpG        | 181     | NM_17720 | 230996 | 9430015G1- |            |
| chr4  | 1.17E+08 | 1.17E+08 | intron (NM | intron (NM | 33146   | NM_00114 | 381544 | Gm1661     | Gm1662 N   |
| chr12 | 60141302 | 60141425 | Intergenic | U2 snRNA   | 21085   | NM_03005 | 78232  | Trappc6b   | 5830498C1  |
| chr4  | 1.2E+08  | 1.2E+08  | intron (NM | intron (NM | -99541  | NM_00790 | 13615  | Edn2       | VIC        |
| chr4  | 1.32E+08 | 1.32E+08 | intron (NM | intron (NM | 8535    | NM_13388 | 100340 | Smpd13b    | 1110054A2  |
| chr1  | 10222727 | 10222925 | promoter-1 | promoter-1 | -75     | NM_00110 | 211673 | Argef1     | ARFGEP1 E  |
| chr12 | 83648127 | 83648350 | Intergenic | L1MD1 LIN  | -69787  | NM_01581 | 50779  | Rgs6       | -          |
| chr17 | 46739127 | 46739250 | intron (NM | intron (NM | 27265   | NM_17516 | 71461  | Ptk7       | 8430404F2  |
| chr10 | 42135852 | 42136150 | intron (NM | intron (NM | 62370   | NM_14574 | 215951 | Lace1      | CG8520     |
| chr2  | 1.21E+08 | 1.21E+08 | promoter-1 | promoter-1 | -220    | NM_01373 | 27223  | Trp53bp1   | 53BP1 Tp5  |
| chr5  | 13527077 | 13527200 | intron (NM | intron (NM | 127829  | NM_00915 | 20346  | Sema3a     | Hsema-1 SI |
| chr19 | 47294727 | 47295100 | intron (NM | (CACAT)n : | -8420   | NM_00116 | 18011  | Neur1a     | 2410129E1  |
| chr9  | 1.24E+08 | 1.24E+08 | Intergenic | Intergenic | 7466    | NM_00987 | 12581  | Cdkn2d     | INK4d p19  |
| chr7  | 86610852 | 86611050 | intron (NM | CpG        | 208     | NM_01746 | 18975  | Polg       | AA409516   |
| chrX  | 1.36E+08 | 1.36E+08 | promoter-1 | promoter-1 | -671    | NM_02327 | 66889  | Rnf128     | 1300002C1  |
| chr10 | 98569202 | 98569425 | promoter-1 | promoter-1 | -492    | NM_02774 | 382406 | Poc1b      | 4933430F1  |
| chr2  | 1.7E+08  | 1.7E+08  | Intergenic | Intergenic | -21831  | NM_02981 | 76960  | Bcas1      | 2210416M   |
| chr11 | 97182577 | 97182675 | intron (NM | intron (NM | 5596    | NM_02592 | 67036  | Mrpl45     | 2600005PC  |
| chr13 | 93420952 | 93421025 | intron (NM | MIRb SINE  | 39895   | NM_17258 | 218442 | Serinc5    | A130038L2  |

|       |          |          |            |            |         |          |        |            |            |
|-------|----------|----------|------------|------------|---------|----------|--------|------------|------------|
| chr6  | 1.25E+08 | 1.25E+08 | intron (NM | intron (NM | 618     | NM_00116 | 381810 | Lpar5      | GPR93 Gm   |
| chr16 | 49713502 | 49713700 | intron (NM | Lx9 LINE L | 14194   | NM_02868 | 73916  | lft57      | 4833420A1  |
| chr13 | 67552802 | 67552900 | promoter-1 | promoter-1 | -291    | NM_17771 | 238692 | Zfp874a    | C330011K1  |
| chr1  | 1.46E+08 | 1.46E+08 | Intergenic | Intergenic | 87328   | NM_00906 | 19735  | Rgs2       | GOS8       |
| chrX  | 1.39E+08 | 1.39E+08 | intron (NM | intron (NM | 84295   | NM_01949 | 56068  | Ammecr1    | 6230420G1  |
| chr13 | 67034377 | 67034500 | promoter-1 | promoter-1 | -430    | NM_02554 | 66410  | Mterf3     | 241001711  |
| chr9  | 1.07E+08 | 1.07E+08 | Intergenic | Intergenic | -4123   | NM_00117 | 56808  | Cacna2d2   | Cacna2d a  |
| chr15 | 80660277 | 80660350 | intron (NM | PB1D10 SI  | 31273   | NM_17712 | 213988 | Tnrc6b     | 2700090M   |
| chr8  | 87428477 | 87428575 | intron (NM | intron (NM | 2699    | NM_01063 | 16596  | Klf1       | Eklf Nan   |
| chr4  | 1.39E+08 | 1.39E+08 | intron (NM | CpG        | 493     | NM_02985 | 77056  | Tmco4      | 4632413C1  |
| chr13 | 67912827 | 67912925 | intron (NR | RLTR26 LT  | -1877   | NM_19832 | 212569 | Zfp273     | 6820416HC  |
| chr9  | 59131952 | 59132175 | Intergenic | Intergenic | -7316   | NM_02812 | 72141  | Adpgk      | 2610017GC  |
| chr11 | 84011452 | 84011700 | intron (NM | intron (NM | 2636    | NM_13336 | 107476 | Acaca      | A530025KC  |
| chr17 | 31176577 | 31176850 | Intergenic | Intergenic | -17926  | NM_00959 | 11307  | Abcg1      | AW413978   |
| chr14 | 22133902 | 22134000 | intron (NM | intron (NM | -185041 | NM_00120 | 54169  | Kat6b      | AI507552 I |
| chr19 | 8915127  | 8915275  | intron (NM | MIRb SINE  | 208     | NM_00129 | 14705  | Bscl2      | 2900097C1  |
| chr4  | 88941127 | 88941250 | promoter-1 | promoter-1 | -665    | NM_00987 | 12578  | Cdkn2a     | ARF-INK4a  |
| chr19 | 4497802  | 4497875  | intron (NM | intron (NM | 745     | NM_02723 | 69861  | 2010003K1- |            |
| chr3  | 30692227 | 30692450 | intron (NM | CpG        | 540     | NM_02701 | 69276  | Sec62      | 3100002M   |
| chr12 | 1.18E+08 | 1.18E+08 | 5' UTR (NV | 5' UTR (NV | 135     | NM_14603 | 217935 | Wdr60      | D430033N   |
| chr1  | 1.73E+08 | 1.73E+08 | promoter-1 | promoter-1 | -961    | NM_00108 | 226641 | Atf6       | 9130025P1  |
| chr1  | 1.57E+08 | 1.57E+08 | Intergenic | L2 LINE L2 | -68901  | NM_00978 | 12290  | Cacna1e    | A430040I1  |
| chr14 | 21747402 | 21747625 | Intergenic | Intergenic | -1142   | NM_00950 | 22330  | Vcl        | 9430097D2  |
| chr13 | 30076477 | 30076550 | promoter-1 | promoter-1 | -253    | NM_00128 | 13557  | E2f3       | E2F3b E2f3 |
| chr2  | 26819952 | 26820025 | promoter-1 | promoter-1 | -82     | NM_20723 | 227656 | Rexo4      | Gm111 Xp   |
| chr16 | 20535702 | 20535825 | intron (NM | CpG        | 186     | NM_00967 | 11773  | Ap2m1      | -          |
| chr11 | 65601377 | 65601450 | intron (NM | CpG        | 386     | NM_00915 | 26398  | Map2k4     | JNKK1 MEI  |
| chr18 | 32717177 | 32717650 | intron (NM | intron (NM | 2275    | NM_00104 | 71683  | Gypc       | 0610037F2  |
| chr7  | 82926352 | 82926425 | Intergenic | Intergenic | -66836  | NM_00112 | 207952 | Klhl25     | 2810402K1  |
| chr7  | 97591302 | 97591375 | promoter-1 | promoter-1 | 47      | NR_07343 | 233490 | Crebzf     | 1110034C1  |
| chr10 | 1.1E+08  | 1.1E+08  | intron (NM | CpG        | 471     | NM_17255 | 320150 | Zdhhc17    | A230053P1  |
| chr1  | 1.93E+08 | 1.93E+08 | intron (NM | intron (NM | 18948   | NM_17877 | 320119 | Rps6kc1    | AA682037   |
| chr15 | 36217252 | 36217450 | Intergenic | Intergenic | -4449   | NM_01392 | 30945  | Rnf19a     | AA032313   |
| chr12 | 71809052 | 71809275 | Intergenic | L1MB8 LIN  | -117338 | NM_02812 | 319710 | Frmd6      | 2610019M   |
| chr10 | 1.26E+08 | 1.26E+08 | TTS (NM_0  | TTS (NM_0  | 32939   | NM_02685 | 68876  | Xrcc6bp1   | 1110068E0  |
| chr7  | 1.33E+08 | 1.33E+08 | promoter-1 | promoter-1 | 92      | NM_02984 | 77035  | Kdm8       | 3110005O2  |
| chr1  | 59176677 | 59176850 | promoter-1 | promoter-1 | -113    | NM_00103 | 381259 | Tmem237    | AI853305 , |
| chr7  | 54094827 | 54094900 | Intergenic | Intergenic | -6311   | NM_01069 | 16828  | Ldha       | Ldh1 Ldhr  |
| chr8  | 27090752 | 27091050 | TTS (NM_0  | TTS (NM_0  | -3685   | NM_02988 | 52120  | Hgsnat     | 9430010M   |
| chr3  | 68761377 | 68761600 | intron (NM | Lx8 LINE L | 47004   | NM_02664 | 68259  | lft80      | 4921524P2  |
| chr16 | 18809102 | 18809500 | intron (NM | intron (NM | 2431    | NM_00116 | 12544  | Cdc45      | Cdc45I     |
| chr3  | 30867627 | 30867925 | intron (NM | CpG        | 561     | NM_00116 | 241915 | Phc3       | E030046K0  |
| chr7  | 34953602 | 34953825 | promoter-1 | promoter-1 | -165    | NM_01668 | 50995  | Uba2       | AA986091   |
| chr2  | 29790677 | 29790750 | promoter-1 | promoter-1 | -216    | NM_02892 | 74412  | Gle1       | 4933405K2  |
| chr8  | 74874627 | 74874750 | intron (NM | intron (NM | 31727   | NM_00845 | 16598  | Klf2       | Lklf       |
| chr12 | 86337152 | 86337575 | promoter-1 | promoter-1 | 92      | NM_17836 | 56531  | Ylpm1      | A930013E1  |
| chr5  | 1.16E+08 | 1.16E+08 | Intergenic | Intergenic | -6097   | NM_01122 | 19303  | Pxn        | AW108311   |

|       |          |          |            |            |         |          |        |          |            |
|-------|----------|----------|------------|------------|---------|----------|--------|----------|------------|
| chr1  | 33692477 | 33692650 | intron (NM | intron (NM | 34076   | NM_00892 | 19076  | Prim2    | AI323589   |
| chr10 | 67267402 | 67267625 | Intergenic | Intergenic | 107897  | NM_17867 | 216049 | Zfp365   | AI839779   |
| chr18 | 47118477 | 47118675 | promoter-1 | promoter-1 | 46      | NM_17837 | 69456  | Comm10   | 2310003AC  |
| chr4  | 93883027 | 93883300 | Intergenic | MER45R D   | 340324  | NM_02636 | 67770  | Caap1    | 5830433M   |
| chr4  | 1.31E+08 | 1.31E+08 | intron (NM | CpG        | 247     | NM_02058 | 57317  | Srsf4    | 5730499P1  |
| chr4  | 1.23E+08 | 1.23E+08 | intron (NM | CpG        | 236     | NM_02587 | 66966  | Trit1    | 2310075G1  |
| chr4  | 33159827 | 33160200 | intron (NM | intron (NM | 9926    | NM_00807 | 14409  | Gabrr2   | -          |
| chr1  | 88968502 | 88968775 | Intergenic | Intergenic | 17865   | NM_00743 | 11650  | Alpl2    | Akp5 C772  |
| chr5  | 1.23E+08 | 1.23E+08 | Intergenic | Intergenic | -20892  | NR_02783 | 11938  | Atp2a2   | 9530097L1  |
| chr14 | 31366352 | 31366700 | intron (NM | intron (NM | 4209    | NM_00938 | 21881  | Tkt      | p68        |
| chr2  | 59915527 | 59915650 | intron (NM | intron (NM | 48209   | NM_00100 | 407823 | Baz2b    | 5830435C1  |
| chr11 | 53840777 | 53840925 | intron (NM | intron (NM | 741     | NM_01968 | 30805  | Slc22a4  | Octn1      |
| chr1  | 1.79E+08 | 1.79E+08 | Intergenic | Intergenic | -3341   | NM_00101 | 30928  | Zbtb18   | RP58 Zfp2  |
| chr4  | 1.49E+08 | 1.49E+08 | promoter-1 | promoter-1 | -60     | NM_00108 | 110208 | Pgd      | 0610042AC  |
| chr1  | 1.91E+08 | 1.91E+08 | exon (NM_  | exon (NM_  | 243     | NM_17265 | 226823 | Kctd3    | 4930438A2  |
| chr6  | 1.4E+08  | 1.4E+08  | intron (NM | intron (NM | 11285   | NM_01108 | 18705  | Pik3c2g  | C80387 PI  |
| chr8  | 1.08E+08 | 1.08E+08 | promoter-1 | promoter-1 | -30     | NM_00130 | 234699 | Ecd4     | BC022641   |
| chrX  | 74755352 | 74755425 | Intergenic | Intergenic | -1178   | NM_02060 | 21372  | Tbl1x    | 5330429M   |
| chr12 | 88224152 | 88224350 | exon (NM_  | exon (NM_  | 1513    | NM_14583 | 238330 | Irf2bp1  | 6430527G1  |
| chr2  | 1.18E+08 | 1.18E+08 | Intergenic | Intergenic | -122482 | NM_01158 | 21825  | Thbs1    | TSP-1 TSP1 |
| chr13 | 6634152  | 6634300  | intron (NM | B4A SINE   | 13791   | NM_01970 | 56421  | Pfkp     | 1200015H2  |
| chr4  | 69957877 | 69957950 | intron (NM | intron (NM | 113488  | NM_14599 | 214444 | Cdk5rap2 | 2900018KC  |
| chr11 | 9433227  | 9433375  | intron (NM | intron (NM | 341356  | NM_17825 | 268379 | Abca13   | 9830132L2  |
| chr4  | 1.55E+08 | 1.55E+08 | exon (NM_  | exon (NM_  | 318     | NM_01138 | 20481  | Ski      | 231001210  |
| chr4  | 60020452 | 60020600 | Intergenic | Intergenic | 4105    | NM_00108 | 620807 | Mup6     | Gm12544    |
| chr5  | 1.41E+08 | 1.41E+08 | intron (NM | intron (NM | 6859    | NM_17527 | 78339  | Ttyh3    | 2900029G1  |
| chr15 | 76470627 | 76470750 | promoter-1 | promoter-1 | -329    | NM_18309 | 72749  | Tonsl    | 2810439M   |
| chr10 | 74518377 | 74518550 | Intergenic | Intergenic | -5178   | NM_00108 | 110279 | Bcr      | 5133400CC  |
| chr8  | 82163327 | 82163425 | promoter-1 | promoter-1 | -199    | NM_00125 | 73945  | Otud4    | 4930431L1  |
| chr8  | 47196777 | 47196900 | intron (NM | intron (NM | 12662   | NM_20721 | 102141 | Snx25    | AI661919   |
| chr12 | 85749152 | 85749275 | promoter-1 | promoter-1 | 766     | NM_00764 | 12499  | Entpd5   | AI196558   |
| chr17 | 46297602 | 46297775 | promoter-1 | promoter-1 | -293    | NM_01958 | 56055  | Gtpbp2   | nmf205     |
| chr19 | 5444552  | 5444850  | Intergenic | L1MB5 LIN  | -2997   | NM_01023 | 14283  | Fosl1    | AW538199   |
| chr15 | 76157702 | 76157825 | promoter-1 | promoter-1 | -64     | NM_17539 | 109075 | Exosc4   | 111003910  |
| chr17 | 3114627  | 3114975  | promoter-1 | promoter-1 | -171    | NM_13412 | 106583 | Scaf8    | A630086M   |
| chr3  | 51685852 | 51686050 | intron (NM | intron (NM | 220836  | NM_17499 | 211666 | Mgst2    | GST2 MGS   |
| chr4  | 1.18E+08 | 1.18E+08 | promoter-1 | promoter-1 | -179    | NM_03361 | 114143 | Atp6v0b  | 2310024H1  |
| chr12 | 56937377 | 56937725 | exon (NM_  | exon (NM_  | 198     | NM_00103 | 52592  | Brms1l   | 0710008O1  |
| chr8  | 86263952 | 86264150 | intron (NM | intron (NM | 1159    | NM_00116 | 26364  | Cd97     | AA409984   |
| chr19 | 37643652 | 37643750 | intron (NM | intron (NM | 18793   | NM_17535 | 107371 | Exoc6    | 4833405E0  |
| chr9  | 70132602 | 70132750 | intron (NM | intron (NM | 77519   | NM_18107 | 71602  | Myo1e    | 2310020N2  |
| chr11 | 70795602 | 70795875 | exon (NM_  | exon (NM_  | 790     | NM_00757 | 12261  | C1qbp    | AA407365   |
| chr13 | 75962477 | 75962550 | Intergenic | Intergenic | -14821  | NM_05310 | 93692  | Glrx     | C86710 D1  |
| chr16 | 45224127 | 45224250 | promoter-1 | promoter-1 | -262    | NM_00103 | 208154 | Btla     | A630002H2  |
| chr13 | 1.14E+08 | 1.14E+08 | intron (NM | intron (NM | 4471    | NM_13079 | 170625 | Snx18    | Snag1      |
| chr1  | 71603752 | 71604050 | intron (NM | CpG        | 171     | NM_02619 | 108147 | Atic     | 2610509C2  |
| chr10 | 1.27E+08 | 1.27E+08 | promoter-1 | promoter-1 | 101     | NM_00124 | 14421  | B4galnt1 | 4933429D1  |

|       |          |          |                        |        |          |        |            |            |
|-------|----------|----------|------------------------|--------|----------|--------|------------|------------|
| chr1  | 55187777 | 55188000 | promoter-1promoter-1   | -201   | NM_02528 | 19070  | Mob4       | 2610109B1  |
| chr5  | 3596052  | 3596450  | 5' UTR (NM 5' UTR (NM  | 185    | NM_00129 | 71382  | Pex1       | 5430414HC  |
| chr1  | 82758252 | 82758600 | intron (NM intron (NM  | 6605   | NM_02545 | 66261  | Tm4sf20    | 1810018L0  |
| chrX  | 23270877 | 23271050 | intron (NM intron (NM  | 720    | NM_17518 | 72404  | Wdr44      | 2610034K1  |
| chr17 | 71443327 | 71443450 | intron (NM intron (NM  | 74491  | NM_00108 | 17929  | Myom1      | D430047A:  |
| chr1  | 87961277 | 87961375 | 5' UTR (NM 5' UTR (NM  | 132    | NM_02735 | 70247  | Psmd1      | 2410026J1  |
| chr9  | 1.04E+08 | 1.04E+08 | intron (NM intron (NM  | 1872   | NM_00116 | 235567 | Dnajc13    | D030002L1  |
| chr4  | 65883727 | 65884225 | intron (NM MIRm SINI   | 181541 | NM_01951 | 56079  | Astn2      | 1d8 Astn1  |
| chr3  | 1E+08    | 1E+08    | Intergenic Intergenic  | -6461  | NM_00114 | 74645  | Fam46c     | 4930431BC  |
| chr6  | 29399477 | 29399550 | intron (NM intron (NM  | 16360  | NM_00108 | 68794  | Flnc       | 1110055E1  |
| chr7  | 65951052 | 65951350 | intron (NM intron (NM  | 37629  | NM_00972 | 11982  | Atp10a     | Atp10c pfa |
| chr1  | 1.09E+08 | 1.09E+08 | Intergenic MIR SINE    | 27535  | NM_02586 | 66957  | Serpinb11  | 2310046M   |
| chr13 | 31065552 | 31066050 | intron (NM CpG         | 115    | NM_02558 | 66482  | Exoc2      | 2410030I2  |
| chr5  | 1.3E+08  | 1.3E+08  | promoter-1promoter-1   | -905   | NM_00939 | 19384  | Ran        | -          |
| chr12 | 86910652 | 86910725 | Intergenic Intergenic  | -29367 | NM_00120 | 81703  | Jdp2       | Jundm2 Ju  |
| chr12 | 55289277 | 55289475 | intron (NM intron (NM  | 15485  | NM_02813 | 112407 | Egln3      | 2610021GC  |
| chr3  | 1.52E+08 | 1.52E+08 | promoter-1promoter-1   | 109    | NM_02728 | 67035  | Dnajb4     | 1700029A2  |
| chr15 | 76028827 | 76029100 | promoter-1promoter-1   | -324   | NM_20139 | 18810  | Plec       | AA591047   |
| chr1  | 36893502 | 36893650 | intron (NM intron (NM  | 57747  | NM_00128 | 22637  | Zap70      | Srk ZAP-7C |
| chr18 | 75522902 | 75523225 | Intergenic Intergenic  | -3956  | NM_00104 | 17131  | Smad7      | Madh7      |
| chr15 | 99195477 | 99195550 | intron (NM intron (NM  | 5384   | NM_01171 | 22379  | Fmnl3      | 2700073BC  |
| chr15 | 74819402 | 74819700 | Intergenic Intergenic  | -5691  | NM_02049 | 57248  | Ly6i       | AI789751   |
| chr6  | 1.31E+08 | 1.31E+08 | Intergenic L1_Mus2 L   | 14924  | NM_02556 | 66441  | Magohb     | 2010012C1  |
| chr6  | 1.24E+08 | 1.24E+08 | intron (NM HAL1 LINE   | 3132   | NM_18134 | 232371 | C1rl       | C1r-LP C1r |
| chr17 | 35119952 | 35120050 | intron (NM intron (NM  | 926    | NM_03059 | 27756  | Lsm2       | D17H6S56f  |
| chr10 | 1.18E+08 | 1.18E+08 | Intergenic Intergenic  | -38217 | NM_00116 | 17245  | Mdm1       | Arrd2 Mdr  |
| chr9  | 1.24E+08 | 1.24E+08 | intron (NML1_Rod LIN   | 30870  | NM_01173 | 22599  | Slc6a20b   | AA986306   |
| chr8  | 48619352 | 48619425 | promoter-1promoter-1   | 389    | NM_20350 | 192174 | Rwdd4a     | BC016198   |
| chr14 | 72963702 | 72963975 | intron (NM intron (NM  | 145972 | NM_20763 | 319448 | Fndc3a     | 1700094E1  |
| chr1  | 37947102 | 37947650 | promoter-1promoter-1   | -22    | NM_02709 | 107734 | Mrpl30     | 2310001L2  |
| chr7  | 1.28E+08 | 1.28E+08 | 3' UTR (NM 3' UTR (NM  | -6670  | NM_17769 | 233813 | Vwa3a      | E030013GC  |
| chr1  | 1.59E+08 | 1.59E+08 | Intergenic Intergenic  | -56669 | NM_02388 | 78255  | Ralgps2    | 1810020P1  |
| chr1  | 1.65E+08 | 1.65E+08 | Intergenic Intergenic  | 21146  | NM_17888 | 98376  | Gorab      | AI467484   |
| chr18 | 24762377 | 24762575 | promoter-1promoter-1   | 14     | NM_02144 | 58523  | Elp2       | AU023723   |
| chr9  | 78328602 | 78329475 | intron (NM CpG         | 493    | NM_01010 | 13627  | Eef1a1     | -          |
| chr3  | 79371277 | 79371775 | promoter-1promoter-1   | 75     | NM_00116 | 329679 | Fnip2      | D630023B1  |
| chr5  | 1.11E+08 | 1.11E+08 | intron (NM CpG         | 255    | NM_00116 | 72542  | Pgam5      | 2610528A1  |
| chr11 | 98221452 | 98221600 | intron (NM intron (NM  | 1844   | NM_02154 | 59045  | Stard3     | Mln64 es6  |
| chr16 | 48994002 | 48994225 | promoter-1promoter-1   | 112    | NM_00111 | 224170 | Dzip3      | 2310047CC  |
| chr2  | 24603727 | 24603800 | intron (NM Tigger1 DN  | 14909  | NM_00104 | 12287  | Cacna1b    | AW050276   |
| chr14 | 35362052 | 35362225 | intron (NM CpG         | -26151 | NM_03006 | 78243  | 9230112D1- |            |
| chr13 | 57067727 | 57067900 | Intergenic IAP-d-int L | -70864 | NM_01203 | 26946  | Trpc7      | TRP-7 TRP  |
| chr2  | 1.28E+08 | 1.28E+08 | Intergenic Intergenic  | 76352  | NM_00128 | 12125  | Bcl2l11    | 1500006F2  |
| chr10 | 61802002 | 61802225 | intron (NM intron (NM  | 1056   | NM_00114 | 15275  | Hk1        | BB404130   |
| chr15 | 43311277 | 43311450 | intron (NMB4A SINE     | 2588   | NM_02573 | 66736  | Emc2       | 4921531G1  |
| chr11 | 1.07E+08 | 1.07E+08 | intron (NM intron (NM  | 53746  | NM_14582 | 71795  | Pitpnc1    | 1110020BC  |
| chr13 | 56712602 | 56712725 | intron (NM intron (NM  | 1699   | NM_00936 | 21810  | Tgfb1      | 68kDa Al1  |



|       |          |          |             |            |         |           |        |          |            |
|-------|----------|----------|-------------|------------|---------|-----------|--------|----------|------------|
| chr9  | 72313752 | 72313825 | intron (NM  | intron (NM | 25978   | NM_00935  | 21778  | Tex9     | Gm19407    |
| chr15 | 56868777 | 56869025 | Intergenic  | Intergenic | -342800 | NM_00821  | 15117  | Has2     | -          |
| chr3  | 95659402 | 95660500 | promoter-1  | promoter-1 | -275    | NM_02754  | 70767  | Prpf3    | 3632413F1  |
| chr7  | 1.49E+08 | 1.49E+08 | promoter-1  | promoter-1 | 43      | NM_02652  | 68038  | Chid1    | 3110023E0  |
| chr15 | 3184127  | 3184350  | Intergenic  | RMER10B    | -36529  | NM_00104  | 20363  | Sepp1    | AU018766   |
| chr18 | 52668927 | 52669100 | Intergenic  | Intergenic | 20362   | NM_00128  | 16948  | Lox      | AI893619   |
| chr2  | 1.18E+08 | 1.18E+08 | Intergenic  | Intergenic | -127207 | NM_01158  | 21825  | Thbs1    | TSP-1 TSP1 |
| chr13 | 43266602 | 43266850 | 5' UTR (NM  | 5' UTR (NM | 144     | NM_00125  | 67046  | Tbc1d7   | 2610009CC  |
| chr11 | 11685702 | 11685825 | Intergenic  | Intergenic | 23202   | NM_02189  | 60530  | Fignl1   | -          |
| chr8  | 1.26E+08 | 1.26E+08 | exon (NM_   | exon (NM_  | 102     | NM_17228  | 234865 | Nup133   | mermaid    |
| chr11 | 52173527 | 52173900 | promoter-1  | promoter-1 | -904    | NM_01169  | 22333  | Vdac1    | AL033343   |
| chr11 | 68912602 | 68912700 | intron (NM  | intron (NM | 193     | NM_01106  | 18626  | Per1     | Per m-rigu |
| chr8  | 80042052 | 80042200 | promoter-1  | promoter-1 | -320    | NM_03011  | 78514  | Arhgap10 | A930033BC  |
| chr13 | 64375577 | 64375850 | intron (NM  | CpG        | 583     | NM_17258  | 218294 | Cdc14b   | 2810432N1  |
| chr15 | 76730302 | 76730525 | promoter-1  | promoter-1 | 42      | NM_02553  | 66398  | Commd5   | 2310065HC  |
| chr7  | 29797502 | 29797675 | intron (NM  | ORR1C2 L1  | 29715   | NM_00827  | 26411  | Map4k1   | Hpk1 mHP   |
| chr5  | 1.11E+08 | 1.11E+08 | intron (NM  | CpG        | 191     | NM_00126  | 209683 | Ttc28    | 2310015L0  |
| chr3  | 40604377 | 40604550 | intron (NR_ | CpG        | 590     | NR_04557t | 20873  | Plk4     | 1700028H2  |
| chr1  | 1.83E+08 | 1.83E+08 | Intergenic  | Intergenic | -1006   | NM_14594  | 208768 | Sde2     | -          |
| chr8  | 13848802 | 13848975 | Intergenic  | RMER16-in  | -10799  | NM_15309  | 231201 | AF366264 | Susp4      |
| chr1  | 1.57E+08 | 1.57E+08 | Intergenic  | Intergenic | 16528   | NM_01050  | 15939  | Ier5     | -          |
| chr8  | 1.12E+08 | 1.12E+08 | promoter-1  | promoter-1 | -206    | NM_02946  | 75871  | Zfp821   | 4930566A1  |
| chr13 | 42147652 | 42147925 | intron (NM  | CpG        | 398     | NM_00777  | 110521 | Hivep1   | Cryabp1    |
| chr4  | 1.19E+08 | 1.19E+08 | intron (NM  | intron (NM | 1080    | NM_01173  | 22608  | Ybx1     | 1700102N1  |
| chr14 | 56340152 | 56340400 | intron (NM  | MIR SINE   | 737     | NM_01951  | 56187  | Rabggta  | gm         |
| chr14 | 28241602 | 28243025 | exon (NM_   | exon (NM_  | 280     | NM_00111  | 218850 | Fam208a  | 4732418E1  |
| chr13 | 58230402 | 58230950 | promoter-1  | promoter-1 | -759    | NM_02987  | 77134  | Hnrnpa0  | 1110055BC  |
| chr11 | 1.22E+08 | 1.22E+08 | promoter-1  | promoter-1 | -536    | NM_17866  | 210004 | B3gnt1   | 6030413G2  |
| chr13 | 32894027 | 32894625 | exon (NM_   | exon (NM_  | 427     | NM_03021  | 78903  | Wrnip1   | 4833444L2  |
| chr11 | 32167652 | 32167725 | promoter-1  | promoter-1 | 19      | NM_18156  | 17168  | Nprl3    | Aag CGTHI  |
| chr1  | 88423827 | 88423975 | intron (NM  | CpG-365    | 590     | NM_00897  | 19231  | Ptma     | Thym       |
| chr2  | 1.73E+08 | 1.73E+08 | intron (NR_ | CpG        | -7359   | NM_02730  | 70065  | Ankrd60  | 1700019A2  |
| chr1  | 95239027 | 95239300 | 5' UTR (NV  | 5' UTR (NV | 202     | NM_08085  | 269224 | Pask     | mKIAA013t  |
| chr1  | 1.22E+08 | 1.22E+08 | intron (NM  | intron (NM | 18069   | NM_01943  | 170706 | Tmem37   | AI173373 , |
| chr18 | 39151902 | 39152175 | promoter-1  | promoter-1 | -761    | NM_17516  | 71302  | Arhgap26 | 1810044B2  |
| chr8  | 1.17E+08 | 1.17E+08 | Intergenic  | Intergenic | 31327   | NM_02443  | 67528  | Nudt7    | 1300007B2  |
| chr14 | 79050527 | 79050825 | intron (NM  | intron (NM | -6418   | NR_10404t | 380921 | Dgkh     | 5930402BC  |
| chr2  | 1.55E+08 | 1.55E+08 | intron (NM  | CpG        | 279     | NM_02603  | 67204  | Eif2s2   | 2810026E1  |
| chr6  | 83004652 | 83004825 | promoter-1  | promoter-1 | 91      | NM_00751  | 11993  | Aup1     | AA589454   |
| chr4  | 82919552 | 82919700 | intron (NM  | RMER17B    | 50467   | NM_02723  | 69863  | Ttc39b   | 1810054DC  |
| chr3  | 9573777  | 9573925  | intron (NM  | intron (NM | 36234   | NM_13321  | 170753 | Zfp704   | C030026M   |
| chr7  | 1.52E+08 | 1.52E+08 | Intergenic  | Intergenic | -30204  | NM_00124  | 101772 | Ano1     | Tmem16a    |
| chr17 | 46787302 | 46787650 | TTS (NM_0   | TTS (NM_0  | 189     | NM_02561  | 66515  | Cul7     | 2510004L2  |
| chr12 | 78279327 | 78279550 | Intergenic  | Intergenic | -59653  | NM_00125  | 53618  | Fut8     | -          |
| chr5  | 36013602 | 36013800 | exon (NM_   | exon (NM_  | 8728    | NM_00104  | 78558  | Htra3    | 2210021K2  |
| chr3  | 1.04E+08 | 1.04E+08 | intron (NM  | URR1B DN   | 36016   | NM_13385  | 99470  | Magi3    | 4732496O1  |
| chr18 | 4266252  | 4266425  | Intergenic  | Intergenic | 86613   | NM_00774  | 26410  | Map3k8   | Cot Cot/Tp |

|       |          |          |             |             |         |           |        |            |            |
|-------|----------|----------|-------------|-------------|---------|-----------|--------|------------|------------|
| chr12 | 66066727 | 66067000 | promoter-1  | promoter-1  | 134     | NM_17780  | 328108 | Fam179b    | A430041BC  |
| chr7  | 1.26E+08 | 1.26E+08 | Intergenic  | L2b LINE L  | 10701   | NM_00994  | 12850  | Coq7       | clk-1      |
| chr2  | 1.53E+08 | 1.53E+08 | intron (NM  | intron (NM  | 30567   | NM_05309  | 84682  | Cox4i2     | Cox4b Cox  |
| chr12 | 80190427 | 80190525 | exon (NM_   | exon (NM_   | 181     | NM_02998  | 110417 | Pigh       | 2210416HC  |
| chr15 | 63536252 | 63536600 | Intergenic  | Intergenic  | 103868  | NM_03137  | 83492  | Gsdmc      | Gsdmc1 M   |
| chrX  | 10721852 | 10721950 | Intergenic  | RMER30 D    | -154482 | NM_00111  | 1E+08  | Gm14483    | OTTMUSG(   |
| chr11 | 4684727  | 4684850  | intron (NM  | L2c LINE L  | -38007  | NM_13894  | 192650 | Cabp7      | -          |
| chr4  | 35047652 | 35047875 | intron (NM  | intron (NM  | -51541  | NM_19915  | 387510 | Ifnk       | -          |
| chr6  | 39068027 | 39068225 | promoter-1  | promoter-1  | 222     | NM_17289  | 243771 | Parp12     | 9930021O:  |
| chr4  | 1.25E+08 | 1.25E+08 | Intergenic  | Intergenic  | 13674   | NM_15315  | 230738 | Zc3h12a    | BC036563   |
| chr11 | 1.15E+08 | 1.15E+08 | Intergenic  | B4 SINE B.  | 19087   | NM_19922  | 217304 | Cd300lb    | CLM-7 Clr  |
| chr3  | 60335152 | 60335450 | intron (NM  | intron (NM  | 30127   | NM_00125  | 56758  | Mbnl1      | Mbnl mKI/  |
| chr17 | 28358402 | 28358500 | intron (NM  | intron (NM  | -11248  | NM_01114  | 19015  | Ppard      | NUC-1 NU   |
| chr19 | 53855527 | 53855975 | intron (NM  | intron (NM  | 103955  | NM_00117  | 73713  | Rbm20      | 1110018J2  |
| chr12 | 1.01E+08 | 1.01E+08 | Intergenic  | L1MC4a LI   | -44765  | NM_00894  | 19179  | Psmc1      | AI325227   |
| chr15 | 31383577 | 31383700 | promoter-1  | promoter-1  | -194    | NM_14585  | 252967 | Ropn1l     | ASP AV047  |
| chr4  | 1.32E+08 | 1.32E+08 | intron (NM  | CpG         | 552     | NM_00119  | 100088 | Rcc1       | 4931417M   |
| chr13 | 36200452 | 36200675 | intron (NM  | intron (NM  | 8663    | NM_20135  | 380840 | Lyrn4      | BC034664   |
| chr9  | 7331902  | 7332000  | Intergenic  | Intergenic  | -15423  | NM_00860  | 17381  | Mmp12      | AV378681   |
| chr9  | 46081152 | 46081300 | promoter-1  | promoter-1  | 79      | NM_01175  | 22687  | Zpr1       | AI303781 ; |
| chr1  | 1.33E+08 | 1.33E+08 | promoter-1  | promoter-1  | -478    | NM_17869  | 226418 | Yod1       | 9930028C2  |
| chr15 | 93150027 | 93150100 | intron (NR_ | intron (NR_ | 17303   | NR_02831: | 67057  | Yaf2       | 2810021M   |
| chr10 | 62706177 | 62706325 | promoter-1  | promoter-1  | -294    | NM_03011  | 67345  | Herc4      | 1700056O:  |
| chr13 | 46665502 | 46665725 | intron (NM  | intron (NM  | 68341   | NM_02605  | 67252  | Cap2       | 2810452GC  |
| chr9  | 78284552 | 78284625 | intron (NR_ | MT2B LTR    | 6456    | NR_12572: | 214763 | Mb21d1     | E330016A1  |
| chr3  | 88213627 | 88213875 | TTS (NM_0   | TTS (NM_0   | 487     | NM_02592  | 67037  | Pmf1       | 2600009M   |
| chr5  | 75778152 | 75778575 | Intergenic  | Intergenic  | -192649 | NM_00112  | 16590  | Kit        | Bs CD117   |
| chr14 | 69904352 | 69905025 | Intergenic  | L1ME4a LI   | -1528   | NM_02633  | 67712  | Slc25a37   | 1700020E2  |
| chr1  | 1.3E+08  | 1.3E+08  | Intergenic  | Intergenic  | -46158  | NM_14550  | 226414 | Dars       | 5730439G1  |
| chrX  | 1.26E+08 | 1.26E+08 | intron (NM  | (T)n Simpli | 180210  | NM_17249  | 54004  | Diap2      | Dia3 Diap1 |
| chr8  | 47896652 | 47896850 | intron (NM  | intron (NM  | 71652   | NM_00839  | 16363  | Irf2       | 9830146E2  |
| chr10 | 41945002 | 41945100 | intron (NM  | intron (NM  | 51497   | NM_01974  | 56484  | Foxo3      | 1110048B1  |
| chr2  | 1.56E+08 | 1.56E+08 | exon (NM_   | exon (NM_   | 177     | NM_13915  | 245865 | Spag4      | 1700041K2  |
| chr1  | 1.52E+08 | 1.52E+08 | promoter-1  | promoter-1  | -303    | NM_14551  | 226499 | BC003331   | 1810053E1  |
| chr2  | 35095077 | 35095350 | Intergenic  | RMER20B     | -16666  | NM_00120  | 227753 | Gsn        | ADF        |
| chr8  | 97056977 | 97057150 | 5' UTR (NV  | 5' UTR (NV  | 135     | NM_15350  | 234577 | Cpne2      | 3322401K1  |
| chr13 | 1.03E+08 | 1.03E+08 | Intergenic  | Intergenic  | -79516  | NM_00107  | 18708  | Pik3r1     | PI3K p50al |
| chr12 | 71328402 | 71328525 | promoter-1  | promoter-1  | 207     | NM_13319  | 110095 | Pygl       | -          |
| chr18 | 60659827 | 60659950 | intron (NM  | intron (NM  | 1749    | NM_13413  | 106878 | Smim3      | 2010002NC  |
| chr10 | 1.2E+08  | 1.2E+08  | promoter-1  | promoter-1  | -342    | NM_08044  | 117599 | Helb       | AI447783   |
| chr10 | 1.11E+08 | 1.11E+08 | Intergenic  | Intergenic  | -5368   | NM_02860  | 73690  | Glipr1     | 2410114O:  |
| chrX  | 1.2E+08  | 1.2E+08  | Intergenic  | Intergenic  | -72117  | NM_02842  | 73061  | 3110007F1- |            |
| chr11 | 72020227 | 72020400 | promoter-1  | promoter-1  | -743    | NM_02655  | 52700  | Txndc17    | 4831443O:  |
| chr11 | 1E+08    | 1E+08    | intron (NM  | CpG         | 478     | NM_01150  | 20918  | Eif1       | Sui1-rs1   |
| chr2  | 1.12E+08 | 1.12E+08 | promoter-1  | promoter-1  | -81     | NM_13374  | 73024  | Emc7       | 2900064A1  |
| chr11 | 97490502 | 97490800 | 5' UTR (NV  | 5' UTR (NV  | 379     | NM_17533  | 103551 | E130012A1  | AA409164   |
| chr3  | 89047552 | 89047700 | exon (NM_   | exon (NM_   | 1309    | NR_12168: | 360213 | Trim46     | TRIFIC     |

|       |          |          |            |            |         |          |        |            |             |
|-------|----------|----------|------------|------------|---------|----------|--------|------------|-------------|
| chr6  | 54093402 | 54093625 | intron (NM | intron (NM | 103587  | NM_00116 | 69993  | Chn2       | 1700026N2   |
| chr9  | 1.22E+08 | 1.22E+08 | intron (NM | intron (NM | 21542   | NM_13374 | 20623  | Snrk       | 2010012F0   |
| chr2  | 79475952 | 79476125 | intron (NM | CpG        | 456     | NM_08055 | 70599  | Ssfa2      | 5730488C1   |
| chr7  | 1.51E+08 | 1.51E+08 | promoter-1 | promoter-1 | 89      | NM_02429 | 79201  | Tnfrsf23   | Dctrailr1 T |
| chr13 | 1.14E+08 | 1.14E+08 | Intergenic | Intergenic | 17534   | NM_02361 | 71690  | Esm1       | 0610042H2   |
| chr10 | 13272802 | 13273025 | promoter-1 | promoter-1 | 35      | NM_01996 | 56535  | Pex3       | 1700014F1   |
| chr4  | 1.16E+08 | 1.16E+08 | intron (NM | CpG        | 297     | NM_00838 | 16351  | Ipp        | D4Jhu8 Mi   |
| chr1  | 94806902 | 94807100 | promoter-1 | promoter-1 | -401    | NM_18140 | 108657 | Rnpepl1    | 1110014H1   |
| chr5  | 1.02E+08 | 1.02E+08 | intron (NM | intron (NM | 131939  | NM_17288 | 72145  | Wdfy3      | 2610509D0   |
| chr6  | 83081277 | 83081375 | Intergenic | RSINE1 SIN | -4476   | NM_00113 | 20166  | Rtkn       | -           |
| chr1  | 74283427 | 74283775 | intron (NM | CpG        | 477     | NM_02971 | 76709  | Arpc2      | 2210023N0   |
| chr11 | 98572127 | 98572275 | intron (NM | intron (NM | 9574    | NM_00997 | 12985  | Csf3       | Csfg G-CSF  |
| chr1  | 60623402 | 60623475 | 5' UTR (NM | 5' UTR (NM | 171     | NM_00104 | 77300  | Raph1      | 9430025M    |
| chr2  | 25430602 | 25430825 | promoter-1 | promoter-1 | -322    | NM_02929 | 75454  | Phpt1      | 1700008C2   |
| chr16 | 11144152 | 11144350 | intron (NR | LSU-rRNA_  | -9626   | NM_02958 | 106200 | Txndc11    | 2810408E1   |
| chr16 | 65197102 | 65197625 | Intergenic | MTA_Mm     | -91753  | NM_00831 | 15557  | Htr1f      | Htr1eb      |
| chr15 | 6017377  | 6017725  | Intergenic | Intergenic | -232238 | NM_00100 | 13132  | Dab2       | 5730435J1   |
| chr17 | 50643552 | 50643675 | Intergenic | Intergenic | -5259   | NM_01388 | 224860 | Plcl2      | PLC-L2 PRI  |
| chr7  | 1.21E+08 | 1.21E+08 | intron (NM | CpG        | 227     | NM_13370 | 68815  | Btbd10     | 1110056N0   |
| chr7  | 1.34E+08 | 1.34E+08 | 5' UTR (NM | 5' UTR (NM | 189     | NM_00125 | 16408  | Itgal      | (p180) Cd1  |
| chr17 | 47921327 | 47921550 | intron (NM | MIRm SINI  | -1255   | NM_01154 | 21425  | Tfeb       | Tcfef bHLI  |
| chr14 | 70274002 | 70274100 | intron (NM | intron (NM | 33837   | NM_02852 | 73523  | Pebp4      | PEBP-4      |
| chr8  | 27585477 | 27585550 | Intergenic | Intergenic | 316872  | NM_19904 | 73754  | Thap1      | 4833431AC   |
| chr12 | 1.01E+08 | 1.01E+08 | intron (NM | intron (NM | 125     | NM_00129 | 217827 | Nrde2      | 6720454PC   |
| chr5  | 32713727 | 32714000 | Intergenic | Intergenic | -47480  | NM_17270 | 19046  | Ppp1cb     | 1200010B1   |
| chr12 | 1.13E+08 | 1.13E+08 | promoter-1 | promoter-1 | 79      | NM_00939 | 21928  | Tnfaip2    | B94 Exoc3   |
| chr1  | 59969902 | 59970175 | exon (NM   | exon (NM   | 188     | NM_00103 | 72750  | Fam117b    | 2810425F2   |
| chr5  | 31495327 | 31495425 | promoter-1 | promoter-1 | 136     | NM_00112 | 13667  | Eif2b4     | Eif2b       |
| chr11 | 61818477 | 61818700 | intron (NM | intron (NM | 48323   | NM_00128 | 432572 | Specc1     | 2810012G0   |
| chr19 | 8972702  | 8972925  | TTS (NM    | 1 TTS (NM  | 266     | NM_00806 | 14376  | Ganab      | AU042638    |
| chr13 | 43510652 | 43510725 | intron (NM | intron (NM | 16943   | NM_02355 | 70078  | Nol7       | 2210008F1   |
| chr2  | 32443277 | 32443550 | intron (NM | intron (NM | 815     | NM_01137 | 20448  | St6galnac4 | SIAT7-D ST  |
| chr5  | 42098102 | 42098200 | intron (NM | intron (NM | 1243    | NM_02729 | 100972 | Rab28      | 2700023PC   |
| chr7  | 73820677 | 73821025 | intron (NM | intron (NM | 13596   | NM_08044 | 117589 | Asb7       | AI449039 ,  |
| chr2  | 72998727 | 72999075 | intron (NM | RSINE1 SIN | 53603   | NM_03009 | 67059  | Ola1       | 2510025G0   |
| chr2  | 18598952 | 18599025 | 5' UTR (NM | 5' UTR (NM | 343     | NM_00755 | 12151  | Bmi1       | AW546694    |
| chr13 | 40548777 | 40548975 | Intergenic | Intergenic | -165496 | NM_17214 | 218165 | Ofcc1      | opo         |
| chr9  | 42291927 | 42292175 | Intergenic | L1MEg LIN  | -11742  | NM_17303 | 272589 | Tbcel      | D330014K2   |
| chr10 | 62443027 | 62443225 | intron (NM | CpG        | 155     | NM_02742 | 70432  | Rufy2      | 2610111M    |
| chr2  | 1.27E+08 | 1.27E+08 | exon (NM   | exon (NM   | 206     | NM_01009 | 13537  | Dusp2      | PAC1        |
| chr1  | 1.68E+08 | 1.68E+08 | exon (NM   | exon (NM   | 302     | NM_01180 | 433375 | Creg1      | AA755314    |
| chr1  | 1.77E+08 | 1.77E+08 | intron (NM | intron (NM | 101707  | NM_01944 | 54418  | Fmn2       | AU024104    |
| chr1  | 1.08E+08 | 1.08E+08 | Intergenic | L1_Mm LII  | -54520  | NM_00112 | 227449 | Zcchc2     | 9930114B2   |
| chr4  | 1.33E+08 | 1.33E+08 | promoter-1 | promoter-1 | -139    | NM_00909 | 20111  | Rps6ka1    | Mapkapk-1   |
| chr18 | 67921227 | 67921450 | Intergenic | B1_Mus1 '  | -13192  | NM_02811 | 72124  | Seh1l      | 2610007A1   |
| chr15 | 1E+08    | 1E+08    | 5' UTR (NM | 5' UTR (NM | 132     | NM_15340 | 207785 | Csrnp2     | CSRNP-2 C   |
| chr1  | 30931052 | 30931275 | Intergenic | PB1D9 SIN  | -11062  | NM_00108 | 213109 | Phf3       | 2310061N1   |

|       |          |          |             |             |         |          |        |           |             |
|-------|----------|----------|-------------|-------------|---------|----------|--------|-----------|-------------|
| chr13 | 96680402 | 96680550 | Intergenic  | Intergenic  | -18599  | NM_02771 | 544963 | Iqgap2    | 4933417J2   |
| chr2  | 79999052 | 79999150 | Intergenic  | Intergenic  | -29532  | NM_00115 | 18573  | Pde1a     | AI987702    |
| chr3  | 1.1E+08  | 1.1E+08  | exon (NM_   | exon (NM_   | 529     | NM_17889 | 99890  | Prmt6     | AW124876    |
| chr17 | 33102752 | 33102900 | promoter-1  | promoter-1  | 50      | NM_15306 | 224691 | Zfp472    | KRIM-1 Kri  |
| chr5  | 73224152 | 73224500 | intron (NM  | intron (NM  | 35361   | NM_00111 | 21682  | Tec       | -           |
| chr17 | 26078927 | 26079025 | promoter-1  | promoter-1  | -42     | NM_01182 | 14755  | Pigq      | Gpi1 Gpi1f  |
| chr8  | 35171377 | 35171550 | promoter-1  | promoter-1  | 303     | NM_00129 | 22428  | Dctn6     | AU044699    |
| chr13 | 25112002 | 25112100 | exon (NM_   | exon (NM_   | 135     | NM_00101 | 380836 | Mrs2      | Gm902 HP    |
| chr5  | 1.19E+08 | 1.19E+08 | Intergenic  | Intergenic  | -84802  | NM_17242 | 76199  | Med13l    | 221041311   |
| chr8  | 1.22E+08 | 1.22E+08 | promoter-1  | promoter-1  | -4      | NM_01996 | 56690  | Mlycd     | AI324784 I  |
| chr3  | 90482877 | 90482975 | Intergenic  | Intergenic  | 9933    | NM_01365 | 20201  | S100a8    | 60B8Ag AI   |
| chr17 | 47990702 | 47990950 | Intergenic  | Intergenic  | -19186  | NM_00110 | 17240  | Mdfi      | I-mf I-mfa  |
| chr11 | 1.2E+08  | 1.2E+08  | intron (NM  | intron (NM  | 746     | NM_13379 | 192662 | Arhgdia   | 5330430M    |
| chr16 | 75912402 | 75912500 | Intergenic  | Intergenic  | -2940   | NM_02338 | 67742  | Samsn1    | 4930571B1   |
| chr3  | 1.06E+08 | 1.06E+08 | promoter-1  | promoter-1  | -227    | NM_14554 | 109905 | Rap1a     | AI848598 I  |
| chr9  | 94437777 | 94438225 | exon (NM_   | exon (NM_   | 499     | NM_00103 | 68861  | 1190002N1 | GoPro49 F   |
| chr4  | 97800752 | 97800825 | Intergenic  | Intergenic  | 249168  | NM_05315 | 94043  | Tm2d1     | 2310026L1   |
| chr17 | 29853627 | 29853850 | intron (NM  | intron (NM  | 224     | NM_02678 | 68597  | Ccdc167   | 1110021J0   |
| chr15 | 66879727 | 66880325 | Intergenic  | Intergenic  | -78823  | NM_00868 | 17988  | Ndrp1     | CAP43 CM    |
| chr14 | 73543152 | 73543500 | intron (NR_ | CpG         | 734     | NR_03318 | 105670 | Rcbtb2    | 2610028E0   |
| chr4  | 3801927  | 3802150  | Intergenic  | Intergenic  | -2786   | NM_02002 | 17451  | Mos       | c-mos       |
| chr1  | 1.53E+08 | 1.53E+08 | Intergenic  | Intergenic  | -99290  | NM_00103 | 117198 | Ivns1abp  | 1190004M    |
| chr10 | 92607852 | 92608175 | Intergenic  | Charlie24 I | -15608  | NM_14623 | 237459 | Cdk17     | 6430598J1I  |
| chr18 | 33496902 | 33497450 | Intergenic  | Intergenic  | -123706 | NM_13377 | 170459 | Stard4    | 4632419C1   |
| chr7  | 17200052 | 17200600 | promoter-1  | promoter-1  | 16      | NM_17273 | 232906 | Arhgap35  | 6430596G1   |
| chr7  | 59116827 | 59117175 | exon (NM_   | exon (NM_   | 636     | NM_00111 | 1E+08  | Fancf     | A730016A1   |
| chr17 | 35036702 | 35036800 | exon (NM_   | exon (NM_   | 832     | NM_14583 | 110147 | Ehmt2     | Bat8 D17E   |
| chr1  | 1.37E+08 | 1.37E+08 | intron (NM  | intron (NM  | 73005   | NM_00930 | 20980  | Syt2      | R74640 ml   |
| chr19 | 16196927 | 16197225 | Intergenic  | Lx8 LINE L  | -10245  | NM_00813 | 14682  | Gnaq      | 1110005L0   |
| chr3  | 1.07E+08 | 1.07E+08 | intron (NM  | intron (NM  | 2854    | NM_00765 | 12508  | Cd53      | AI323659 I  |
| chr15 | 74968277 | 74968375 | Intergenic  | Intergenic  | -25947  | NM_00109 | 1E+08  | Ly6c2     | Ly-6C.2 Ly- |
| chr2  | 1.22E+08 | 1.22E+08 | intron (NM  | intron (NM  | -4573   | NM_08051 | 70928  | Trim69    | 4921519C1   |
| chr12 | 81110927 | 81111150 | Intergenic  | MIRc SINE   | 102962  | NM_00756 | 12192  | Zfp36l1   | AW742437    |
| chr3  | 36183002 | 36183200 | Intergenic  | Intergenic  | -61904  | NM_19819 | 229214 | Qrfpr     | AQ27 Gpr    |
| chr16 | 23127952 | 23128075 | promoter-1  | promoter-1  | -210    | NM_14548 | 106344 | Rfc4      | A1 AI8941   |
| chr3  | 1.08E+08 | 1.08E+08 | intron (NM  | intron (NM  | 20929   | NM_00814 | 14686  | Gnat2     | AW490837    |
| chr18 | 65541577 | 65541725 | intron (NM  | intron (NM  | 11891   | NM_00103 | 225638 | Alpk2     | Gm549 Ha    |
| chr17 | 28852827 | 28853100 | intron (NM  | intron (NM  | 23450   | NM_00116 | 26416  | Mapk14    | CSBP2 Crk   |
| chr9  | 48792602 | 48793200 | promoter-1  | promoter-1  | -589    | NM_17548 | 235323 | Usp28     | 9830148O2   |
| chr14 | 30835902 | 30836100 | 5' UTR (NV  | 5' UTR (NV  | 182     | NM_17534 | 218865 | Chdh      | AU041472    |
| chr1  | 72757352 | 72759125 | intron (NM  | CpG         | 404     | NM_00908 | 19981  | Rpl37a    | -           |
| chr16 | 10411677 | 10411875 | promoter-1  | promoter-1  | -255    | NM_01195 | 26425  | Nubp1     | -           |
| chr8  | 3664502  | 3664750  | Intergenic  | Intergenic  | -1136   | NM_02698 | 69189  | Mcomp1    | 1810033B1   |
| chr9  | 43874902 | 43875150 | promoter-1  | promoter-1  | -78     | NM_19809 | 53376  | Usp2      | B930035K2   |
| chr17 | 32421627 | 32421700 | promoter-1  | promoter-1  | -585    | NM_02050 | 57261  | Brd4      | Brd5 HUNI   |
| chr5  | 31191352 | 31191500 | promoter-1  | promoter-1  | 47      | NM_00104 | 231093 | Agbl5     | 4930455NC   |
| chr9  | 54996727 | 54996875 | promoter-1  | promoter-1  | -375    | NM_18060 | 109161 | Ube2q2    | 3010021M    |

|       |          |          |                       |         |           |        |           |             |
|-------|----------|----------|-----------------------|---------|-----------|--------|-----------|-------------|
| chr19 | 44096102 | 44096275 | exon (NM_exon (NM_    | 7549    | NM_00100  | 226143 | Cyp2c44   | AW107714    |
| chr7  | 73205277 | 73205600 | 5' UTR (NM 5' UTR (NV | 216     | NM_02133  | 68981  | Snrpa1    | 1500015NC   |
| chr9  | 57571077 | 57571275 | intron (NM intron (NM | 14800   | NM_15379  | 353190 | Edc3      | AA517853    |
| chr11 | 1.01E+08 | 1.01E+08 | intron (NM intron (NM | 6907    | NM_14483  | 217203 | Tmem106a  | 0610008L1   |
| chr1  | 1.36E+08 | 1.36E+08 | Intergenic Intergenic | 15606   | NM_00757  | 12227  | Btg2      | AA959598    |
| chr17 | 28655027 | 28655125 | Intergenic CpG        | -12730  | NM_02629  | 67645  | Armc12    | 493051111:  |
| chr1  | 1.73E+08 | 1.73E+08 | 3' UTR (NM 3' UTR (NV | 25696   | NM_17264  | 16456  | F11r      | 9130004G2   |
| chr4  | 1.51E+08 | 1.51E+08 | intron (NM intron (NM | 55726   | NM_00108  | 100072 | Camta1    | 1810059M    |
| chr1  | 1.36E+08 | 1.36E+08 | promoter-1promoter-1  | 69      | NM_15312  | 240756 | Klhl12    | C3ip1       |
| chr6  | 1.13E+08 | 1.13E+08 | exon (NM_exon (NM_    | 150     | NM_00124  | 67767  | Jagn1     | 5830427H1   |
| chr7  | 1.17E+08 | 1.17E+08 | promoter-1promoter-1  | 279     | NM_01197  | 26451  | Rpl27a    | L27' L27A   |
| chr1  | 1.82E+08 | 1.82E+08 | intron (NM intron (NM | 40466   | NM_14610  | 226744 | Cnst      | 9630058J2.  |
| chr8  | 37595877 | 37595950 | Intergenic Intergenic | 43668   | NM_17695  | 319582 | 6430573F1 | Kiaa1456    |
| chr1  | 1.47E+08 | 1.47E+08 | Intergenic Lx8 LINE L | -517650 | NM_02288  | 64214  | Rgs18     | -           |
| chr16 | 44347452 | 44347800 | intron (NM CpG        | 112     | NM_14455  | 212514 | Spice1    | Ccdc52 D1   |
| chr12 | 37160452 | 37160650 | intron (NM intron (NM | 51817   | NM_00128  | 75847  | Ispd      | 4930579E1   |
| chr14 | 65060527 | 65060750 | promoter-1promoter-1  | -761    | NM_00125  | 110265 | Msra      | 2310045J2.  |
| chr9  | 21639677 | 21640025 | promoter-1promoter-1  | -103    | NM_00108  | 624219 | Gm6484    | Angptl8 EC  |
| chr14 | 14793502 | 14793625 | intron (NM CpG        | 264     | NM_00128  | 66231  | Thoc7     | Nif3l1bp1   |
| chr17 | 24388752 | 24388825 | promoter-1promoter-1  | -434    | NM_00763  | 12449  | Ccnf      | CycF Fbxo:  |
| chr11 | 69714702 | 69714900 | promoter-1promoter-1  | -313    | NM_02741  | 70419  | 2810408A1 | 1700019L0   |
| chr13 | 24708427 | 24708700 | intron (NM intron (NM | 2088    | NM_17865  | 193385 | Fam65b    | -           |
| chr17 | 28044577 | 28044825 | promoter-1promoter-1  | -32     | NM_02683  | 68776  | Taf11     | 1110038O1   |
| chr5  | 66156052 | 66156150 | intron (NM CpG        | 1341    | NM_00102  | 333789 | N4bp2     | B3bp E43C   |
| chr5  | 1.06E+08 | 1.06E+08 | intron (NM intron (NM | 2644    | NM_00103  | 433926 | Lrrc8b    | R75581 Ta   |
| chr19 | 41338227 | 41338500 | 5' UTR (NM 5' UTR (NV | 131     | NM_13335  | 107358 | Tm9sf3    | 1810073M    |
| chr5  | 1.49E+08 | 1.49E+08 | Intergenic Intergenic | -49037  | NM_01190  | 24109  | Ubl3      | AW108023    |
| chr6  | 51474652 | 51474900 | intron (NM intron (NM | 874     | NM_00112  | 71982  | Snx10     | 2410004M    |
| chr6  | 1.19E+08 | 1.19E+08 | exon (NM_exon (NM_    | 167     | NM_00103  | 319618 | Dcp1b     | B930050EC   |
| chr2  | 30990752 | 30990900 | intron (NM intron (NM | 6702    | NM_00117  | 14269  | Fnbp1     | 1110057E0   |
| chr17 | 32168627 | 32168875 | intron (NM intron (NM | 2702    | NM_02890  | 74377  | Hsf2bp    | 4932437G1   |
| chr7  | 1.36E+08 | 1.36E+08 | promoter-1promoter-1  | -121    | NM_00102  | 207352 | Sec23ip   | D7Ertcd373i |
| chr11 | 1.17E+08 | 1.17E+08 | intron (NM CpG        | 645     | NM_01135  | 20382  | Srsf2     | D11Wsu17    |
| chr3  | 51221652 | 51221775 | intron (NM intron (NM | 1775    | NM_05308  | 74838  | Naa15     | 5730450D1   |
| chr13 | 98011977 | 98012100 | intron (NM intron (NM | 978     | NM_00793  | 13803  | Enc1      | Nrpb PIG1   |
| chr3  | 1.01E+08 | 1.01E+08 | Intergenic Intergenic | -12821  | NM_14490  | 11928  | Atp1a1    | Atpa-1 BC   |
| chr12 | 17007027 | 17007225 | promoter-1promoter-1  | -202    | NM_00116  | 217430 | Pqlc3     | C78076 E0   |
| chr17 | 34742852 | 34743225 | 5' UTR (NM 5' UTR (NV | 232     | NM_00116  | 55979  | Agpat1    | 1-AGP 1-A   |
| chr8  | 1.13E+08 | 1.13E+08 | intron (NM intron (NM | 30685   | NM_00791  | 13680  | Ddx19a    | DBP5 Ddx1   |
| chr10 | 60814052 | 60814200 | intron (NM intron (NM | 32145   | NM_01375  | 27355  | Pald1     | MMPAL Pa    |
| chr17 | 44790102 | 44790300 | intron (NM intron (NM | 82924   | NR_073425 | 12393  | Runx2     | AML3 Cbfi   |
| chr11 | 23566052 | 23566600 | promoter-1promoter-1  | 350     | NM_02830  | 74467  | Pus10     | 2810013G1   |
| chr1  | 65160027 | 65160475 | intron (NM intron (NM | 9537    | NM_17529  | 98303  | D630023F1 | AI314969    |
| chr16 | 18643577 | 18643675 | Intergenic Intergenic | -13595  | NM_21361  | 18951  | 5-Sep     | Cdcrel-1 C  |
| chr7  | 1.34E+08 | 1.34E+08 | exon (NM_exon (NM_    | 1010    | NM_02663  | 52858  | Cdipt     | 9530042F1   |
| chr8  | 72149302 | 72149400 | promoter-1promoter-1  | 96      | NM_17275  | 234362 | Zfp868    | AI449175 ,  |
| chr2  | 61368402 | 61368750 | Intergenic Intergenic | -48067  | NM_01152  | 21353  | Tank      | C86182 E4   |

|       |          |          |            |            |         |           |        |           |            |
|-------|----------|----------|------------|------------|---------|-----------|--------|-----------|------------|
| chr9  | 1.09E+08 | 1.09E+08 | promoter-1 | promoter-1 | -198    | NM_00892  | 19087  | Prkar2a   | 1110061A2  |
| chr12 | 1.12E+08 | 1.12E+08 | Intergenic | Intergenic | -9621   | NM_01048  | 15519  | Hsp90aa1  | 86kDa 89k  |
| chr5  | 75817302 | 75817375 | Intergenic | Intergenic | -153674 | NM_00112  | 16590  | Kit       | Bs CD117   |
| chr10 | 77441427 | 77441500 | promoter-1 | promoter-1 | 68      | NM_02643  | 67884  | 1810043G  | AV026620   |
| chr7  | 1.49E+08 | 1.49E+08 | promoter-1 | promoter-1 | -237    | NM_02830  | 101513 | Mob2      | 1110017M   |
| chr1  | 43148827 | 43148925 | intron (NM | intron (NM | 6591    | NM_00101  | 73122  | Tgfbra1   | 3110018K1  |
| chr18 | 77481077 | 77481150 | intron (NM | intron (NM | -39584  | NM_17283  | 240411 | Loxhd1    | 1700096C2  |
| chr10 | 44293977 | 44294125 | Intergenic | Intergenic | -115558 | NM_00754  | 12142  | Prdm1     | Blimp-1 Bl |
| chr10 | 79146352 | 79146550 | intron (NM | intron (NM | 1511    | NM_17761  | 216150 | Cdc34     | AI327276 I |
| chr12 | 8514252  | 8514450  | Intergenic | Intergenic | -7560   | NM_00748  | 11852  | Rhob      | AA017882   |
| chr1  | 23929152 | 23929425 | promoter-1 | promoter-1 | -68     | NM_02853  | 98366  | Smad1     | 1700056O1  |
| chr8  | 87185952 | 87186100 | exon (NM_  | exon (NM_  | 725     | NM_01049  | 15936  | Irf2      | AI317238 I |
| chr9  | 32363977 | 32364075 | Intergenic | Intergenic | -14989  | NM_00802  | 14247  | Fli1      | EWSR2 Fli- |
| chr17 | 34341477 | 34341625 | 5' UTR (NM | 5' UTR (NM | 127     | NM_01153  | 21355  | Tap2      | ABC18 AI4  |
| chr4  | 1.41E+08 | 1.41E+08 | intron (NM | CpG        | 2224    | NM_01976  | 56381  | Spn       | Mint mKIA  |
| chr4  | 6417227  | 6417425  | Intergenic | Intergenic | -35908  | NM_01094  | 18201  | Nsmf      | AA959567   |
| chr18 | 75062852 | 75062925 | Intergenic | Intergenic | 58029   | NM_01072  | 16891  | Lipg      | 3110013KC  |
| chr9  | 50575852 | 50575925 | promoter-1 | promoter-1 | 369     | NM_02348  | 68721  | 1110032AC | 4930500NC  |
| chr5  | 65883552 | 65883975 | intron (NM | CpG        | 311     | NM_13369  | 68552  | Smim14    | 1110003E0  |
| chr8  | 37108652 | 37108750 | Intergenic | Intergenic | -49181  | NM_17291  | 244418 | D8Ert82e  | 9830148H2  |
| chr12 | 52967427 | 52967550 | Intergenic | Intergenic | -36965  | NM_14478  | 207304 | Hctd1     | A630086PC  |
| chr17 | 35300852 | 35302225 | intron (NM | CpG        | 284     | NM_00119  | 53761  | Prrc2a    | 3110039BC  |
| chr5  | 1.04E+08 | 1.04E+08 | intron (NM | intron (NM | 28846   | NM_00108  | 17355  | Aff1      | 9630032BC  |
| chr10 | 80856402 | 80856475 | intron (NM | intron (NM | 629     | NM_00109  | 72273  | Smim24    | 2210404OC  |
| chr1  | 1.02E+08 | 1.02E+08 | intron (NM | intron (NM | 307096  | NM_17285  | 241175 | Cntnap5b  | C230078M   |
| chr2  | 71291452 | 71291825 | intron (NM | intron (NM | 243     | NM_02563  | 66559  | Metap1d   | 2310066F2  |
| chr15 | 75740377 | 75740450 | promoter-1 | promoter-1 | 248     | NM_17864  | 105734 | Tigd5     | AA409802   |
| chr19 | 40906052 | 40906225 | intron (NM | CpG        | 369     | NM_17283  | 240665 | Ccnj      | D430039C2  |
| chr12 | 16817502 | 16818300 | non-coding | non-coding | 130     | NM_03327  | 50496  | E2f6      | AI462434 I |
| chr2  | 1.81E+08 | 1.81E+08 | promoter-1 | promoter-1 | -547    | NM_00116  | 269401 | Znf512b   | Gm632      |
| chr1  | 45925777 | 45925950 | Intergenic | Intergenic | 56576   | NM_01691  | 53945  | Slc40a1   | Dusg Fpn1  |
| chr9  | 50817002 | 50817075 | 5' UTR (NM | 5' UTR (NM | 140     | NM_17871  | 235344 | Sik2      | G630080D1  |
| chr5  | 1.09E+08 | 1.09E+08 | promoter-1 | promoter-1 | 497     | NM_02887  | 73130  | Tmed5     | 3110020O1  |
| chr16 | 18248352 | 18248425 | promoter-1 | promoter-1 | 399     | NM_01123  | 19385  | Ranbp1    | Htf9a      |
| chr1  | 1.86E+08 | 1.86E+08 | promoter-1 | promoter-1 | 73      | NM_02201  | 63953  | Dusp10    | 2610306G1  |
| chr6  | 85911752 | 85911850 | promoter-1 | promoter-1 | -140    | NM_02809  | 72102  | Dusp11    | 2010300F2  |
| chr1  | 1.95E+08 | 1.95E+08 | intron (NM | intron (NM | 26037   | NM_14488  | 226861 | Hhat      | 2810432O2  |
| chr13 | 65343202 | 65343375 | Intergenic | CpG        | -36264  | NM_17529  | 97895  | Nlrp4f    | C330026NC  |
| chr2  | 3336902  | 3336975  | intron (NM | intron (NM | 2982    | NM_00857  | 104362 | Meig1     | MLZ-278 N  |
| chr11 | 1.21E+08 | 1.21E+08 | exon (NM_  | exon (NM_  | 200     | NM_00108  | 68837  | Foxk2     | 1110054HC  |
| chr2  | 1.2E+08  | 1.2E+08  | Intergenic | L1MB2 LIN  | -3777   | NM_13383  | 98878  | Ehd4      | 2210022F1  |
| chr7  | 1.09E+08 | 1.09E+08 | promoter-1 | promoter-1 | 56      | NM_13394  | 101706 | Numa1     | 6720401E0  |
| chr4  | 45419127 | 45419475 | intron (NM | intron (NM | 2337    | NM_00100  | 230125 | Slc25a51  | 9130208E0  |
| chr2  | 65962952 | 65963300 | promoter-1 | promoter-1 | -276    | NM_01573  | 14425  | Galnt3    | -          |
| chr7  | 52074977 | 52075075 | intron (NM | intron (NM | -2998   | NR_033136 | 107503 | Atf5      | AFTA Atf7  |
| chr9  | 1.08E+08 | 1.08E+08 | promoter-1 | promoter-1 | -185    | NM_00816  | 14775  | Gpx1      | AI195024 I |
| chr2  | 48862627 | 48862775 | intron (NM | intron (NM | 57673   | NM_02992  | 109241 | Mbd5      | 9430004D1  |

|       |          |          |            |            |         |          |        |            |             |
|-------|----------|----------|------------|------------|---------|----------|--------|------------|-------------|
| chr8  | 88012577 | 88012850 | Intergenic | Intergenic | -3803   | NM_17386 | 108682 | Gpt2       | 4631422CC   |
| chr10 | 1.21E+08 | 1.21E+08 | Intergenic | Intergenic | -22507  | NM_13895 | 192678 | Rassf3     | AW212023    |
| chr6  | 86589252 | 86589550 | Intergenic | Intergenic | 11233   | NM_02641 | 67855  | Asprv1     | 2300003P2   |
| chr8  | 23970002 | 23970200 | promoter-1 | promoter-1 | 90      | NM_00108 | 244349 | Kat6a      | 1500036M    |
| chr19 | 47653777 | 47653950 | promoter-1 | promoter-1 | -646    | NM_00928 | 20874  | Slk        | 9A2 AV021   |
| chr13 | 53472627 | 53472850 | promoter-1 | promoter-1 | -8      | NM_00926 | 268656 | Sptlc1     | AW552086    |
| chr11 | 1.1E+08  | 1.1E+08  | intron (NM | intron (NM | 863     | NM_02188 | 19084  | Prkar1a    | 1300018C2   |
| chr11 | 51781102 | 51781525 | exon (NM_  | exon (NM_  | 180     | NM_02997 | 52626  | Cdkn2aipnl | A430101BC   |
| chr13 | 1.13E+08 | 1.13E+08 | Intergenic | MLT1A LTF  | -158146 | NM_00116 | 77318  | Ankrd55    | C030011J0   |
| chr4  | 55091752 | 55091975 | intron (NM | intron (NM | 131046  | NM_17286 | 242466 | Zfp462     | 6030417HC   |
| chr12 | 36102577 | 36102850 | Intergenic | Intergenic | 116948  | NM_01346 | 11622  | Ahr        | Ah Ahh Al   |
| chr11 | 29426277 | 29426625 | promoter-1 | promoter-1 | 54      | NM_13376 | 76784  | Mtif2      | 2310038D1   |
| chr5  | 31556552 | 31556675 | exon (NM_  | exon (NM_  | 2534    | NM_02722 | 69815  | Krtcap3    | 2010001CC   |
| chr6  | 88320327 | 88320550 | intron (NM | intron (NM | 76095   | NM_02306 | 65967  | Eefsec     | Selb sec    |
| chr3  | 40887452 | 40887550 | promoter-1 | promoter-1 | -533    | NM_02755 | 70804  | Pgrmc2     | 4631434O1   |
| chr4  | 1.34E+08 | 1.34E+08 | intron (NM | CpG        | 407     | NM_00125 | 76824  | Mtfr1l     | 241016610!  |
| chr13 | 37306702 | 37307000 | Intergenic | Intergenic | -130363 | NM_01074 | 17084  | Ly86       | MD-1 MD1    |
| chr3  | 1.01E+08 | 1.01E+08 | 5' UTR (NM | 5' UTR (NM | 167     | NM_14490 | 11928  | Atp1a1     | Atpa-1 BC   |
| chr14 | 51544202 | 51544275 | promoter-1 | promoter-1 | 330     | NM_13367 | 66246  | Osgep      | 1500019L2   |
| chr13 | 54691877 | 54692100 | promoter-1 | promoter-1 | 396     | NM_02593 | 67044  | Higd2a     | 2010110M    |
| chr10 | 57511252 | 57511500 | Intergenic | Intergenic | -2974   | NM_02056 | 57319  | Smpd3a     | 0610010C2   |
| chr12 | 72293752 | 72293975 | intron (NM | intron (NM | 56028   | NM_00116 | 76967  | 2700049AC  | Talpid3 ml  |
| chr6  | 1.46E+08 | 1.46E+08 | intron (NM | intron (NM | 1007    | NM_01058 | 16439  | Itpr2      | AI649341    |
| chr14 | 45839627 | 45840000 | promoter-1 | promoter-1 | 421     | NM_02751 | 70713  | Gpr137c    | 6330416L1   |
| chr3  | 86558152 | 86558275 | intron (NM | intron (NM | 166593  | NM_00119 | 70762  | Dclk2      | 6330415M    |
| chr13 | 59329577 | 59329875 | Intergenic | Intergenic | 316086  | NM_00128 | 67269  | Agtbbp1    | 1700020N1   |
| chr4  | 1.05E+08 | 1.05E+08 | Intergenic | MER58B D   | -7776   | NM_08055 | 67916  | Ppap2b     | 1110003O2   |
| chr2  | 24191252 | 24191325 | Intergenic | Intergenic | -1092   | NM_03116 | 16181  | Il1rn      | F630041P1   |
| chr8  | 67353277 | 67353500 | intron (NM | B3 SINE B  | 20434   | NM_17863 | 77113  | Klhl2      | 6030411N2   |
| chr10 | 82616677 | 82617050 | intron (NM | intron (NM | 168621  | NM_02143 | 58250  | Chst11     | 1110020PC   |
| chr14 | 64806427 | 64806650 | intron (NM | intron (NM | 83378   | NM_02852 | 73382  | Prss52     | 1700049K1   |
| chr12 | 74147977 | 74148050 | promoter-1 | promoter-1 | -314    | NM_00918 | 20471  | Six1       | BB138287    |
| chr12 | 70781702 | 70781925 | intron (NM | GC_rich Lc | 1026    | NM_00113 | 20663  | Sos2       | SOS-2 mSC   |
| chr12 | 76554402 | 76554825 | 3' UTR (NM | 3' UTR (NM | -36845  | NM_17564 | 217674 | Gphb5      | Zlut1       |
| chr9  | 44039202 | 44039300 | intron (NM | intron (NM | 2878    | NM_00761 | 12402  | Cbl        | 4732447J0   |
| chr19 | 21535777 | 21536275 | intron (NM | intron (NM | 11125   | NM_01026 | 14544  | Gda        | AU015411    |
| chr12 | 1.02E+08 | 1.02E+08 | Intergenic | Intergenic | -26619  | NM_00103 | 104718 | Ttc7b      | AA408451    |
| chr1  | 89651827 | 89651925 | promoter-1 | promoter-1 | -710    | NM_02984 | 77040  | Atg16l1    | 1500009KC   |
| chr19 | 36484227 | 36484575 | intron (NM | CpG        | 30844   | NM_02950 | 76073  | Pcgf5      | 0610009F0   |
| chr6  | 1.37E+08 | 1.37E+08 | promoter-1 | promoter-1 | -486    | NM_17565 | 320332 | Hist4h4    | B130044J0   |
| chr14 | 55325127 | 55325725 | Intergenic | Intergenic | 5585    | NM_20713 | 110794 | Cebpe      | C/EBPe CR   |
| chr11 | 1.16E+08 | 1.16E+08 | intron (NM | intron (NM | 641     | NM_17880 | 338364 | Trim65     | 4732463G1   |
| chr6  | 17059302 | 17059525 | Intergenic | Intergenic | 44264   | NM_20717 | 21753  | Tes        | D6Erttd352i |
| chr10 | 98733052 | 98733425 | Intergenic | Intergenic | 7373    | NM_02626 | 67603  | Dusp6      | 130001910:  |
| chr6  | 1.25E+08 | 1.25E+08 | promoter-1 | promoter-1 | -128    | NM_01160 | 21937  | Tnfrsf1a   | CD120a FP   |
| chrX  | 39540102 | 39540175 | intron (NM | intron (NM | -14894  | NM_00129 | 20843  | Stag2      | 9230105L2   |
| chr11 | 1.21E+08 | 1.21E+08 | promoter-1 | promoter-1 | -54     | NM_02682 | 68730  | Dus1l      | 1110032N1   |

|       |          |          |                        |         |           |        |            |            |
|-------|----------|----------|------------------------|---------|-----------|--------|------------|------------|
| chr2  | 1.1E+08  | 1.1E+08  | promoter-1promoter-1   | 52      | NM_02661  | 68201  | Ccdc34     | 281002701  |
| chr6  | 1.41E+08 | 1.41E+08 | promoter-1promoter-1   | -422    | NM_00100  | 11569  | Aebp2      | AU023766   |
| chr1  | 1.3E+08  | 1.3E+08  | intron (NM intron (NM  | 5044    | NM_00108  | 226413 | Lct        | Gm100 LA   |
| chr1  | 1.27E+08 | 1.27E+08 | intron (NM intron (NM  | 928     | NM_02373  | 74117  | Actr3      | 1200003AC  |
| chr11 | 1.05E+08 | 1.05E+08 | 5' UTR (NV 5' UTR (NV  | 113     | NM_18107  | 77097  | Tanc2      | 3526402JO  |
| chr3  | 69908452 | 69908650 | Intergenic Intergenic  | 97016   | NM_00101  | 229389 | Otol1      | Gm414      |
| chr10 | 1.19E+08 | 1.19E+08 | promoter-1promoter-1   | -802    | NM_02799  | 71902  | Cand1      | 2310038OC  |
| chr6  | 1.18E+08 | 1.18E+08 | Intergenic L1MA7 LIN   | -7565   | NM_02752  | 70727  | Rasgef1a   | 6330404M   |
| chr1  | 75205627 | 75205800 | exon (NM_exon (NM_     | 1640    | NM_02901  | 74577  | Glb1l      | 4833408P1  |
| chr2  | 1.15E+08 | 1.15E+08 | Intergenic MLT1B LTF   | -231012 | NM_02567  | 66632  | Dph6       | 5730421E1  |
| chr6  | 1.15E+08 | 1.15E+08 | intron (NM intron (NM  | 1682    | NM_00125  | 74244  | Atg7       | 1810013K2  |
| chr17 | 56615827 | 56616300 | promoter-1promoter-1   | -160    | NM_01121  | 19280  | Ptprs      | AL022616   |
| chr1  | 39633652 | 39634025 | exon (NM_exon (NM_     | 354     | NM_00103  | 67702  | Rnf149     | 1600023E1  |
| chr15 | 78858327 | 78858450 | promoter-1promoter-1   | -254    | NM_00819  | 14958  | H1f0       | D130017DC  |
| chr11 | 1.05E+08 | 1.05E+08 | 3' UTR (NV 3' UTR (NV  | -11372  | NM_00862  | 17534  | Mrc2       | Endo180 n  |
| chr19 | 3767952  | 3768025  | intron (NM CpG         | 567     | NM_00116  | 225888 | Suv420h1   | AA117471   |
| chr17 | 80882652 | 80882875 | Intergenic Intergenic  | -2970   | NM_00923  | 20662  | Sos1       | 4430401PC  |
| chr12 | 1.12E+08 | 1.12E+08 | Intergenic Intergenic  | -6245   | NM_17520  | 74251  | Ankrd9     | 2500003O2  |
| chr12 | 1.1E+08  | 1.1E+08  | intron (NM intron (NM  | 31012   | NM_00104  | 68519  | Eml1       | 1110008N2  |
| chr1  | 94651877 | 94652250 | Intergenic Intergenic  | -76200  | NM_01669  | 14733  | Gpc1       | AI462976   |
| chr5  | 1.37E+08 | 1.37E+08 | intron (NM ID_B1 SIN   | 47088   | NM_00129  | 13047  | Cux1       | CDP Cut1   |
| chr4  | 56623177 | 56623300 | Intergenic Intergenic  | 131059  | NM_02527  | 11471  | Act17b     | Tact1      |
| chr5  | 1.16E+08 | 1.16E+08 | promoter-1promoter-1   | -528    | NM_17540  | 109154 | Mlec       | 2410014AC  |
| chr15 | 81344702 | 81344775 | Intergenic Intergenic  | 47992   | NM_01971  | 56438  | Rbx1       | 1500002P1  |
| chr13 | 63215052 | 63215175 | intron (NM intron (NM  | -126225 | NR_11052( | 72061  | 201011110: | 2300006M   |
| chr10 | 20602577 | 20602850 | Intergenic Intergenic  | -69640  | NM_02620  | 52906  | Ahi1       | 1700015FO  |
| chr5  | 1.44E+08 | 1.44E+08 | promoter-1promoter-1   | -515    | NM_00900  | 19353  | Rac1       | AL023026   |
| chr2  | 1.81E+08 | 1.81E+08 | promoter-1promoter-1   | 309     | NM_00100  | 269400 | Rtel1      | AI451565 , |
| chr2  | 52457802 | 52458175 | intron (NM intron (NM  | -43857  | NM_00128  | 12298  | Cacnb4     | 3110038O1  |
| chr7  | 91420827 | 91420900 | intron (NM intron (NM  | -120460 | NM_13372  | 70178  | Abhd17c    | 2210412DC  |
| chr10 | 63650802 | 63651150 | intron (NM intron (NM  | -97973  | NM_17867  | 216028 | Lrrtm3     | 9630044HC  |
| chr11 | 79118902 | 79119050 | Intergenic MLT1F LTF   | -34418  | NM_01089  | 18015  | Nf1        | AW494271   |
| chr14 | 73735002 | 73735150 | Intergenic Intergenic  | -9478   | NM_00902  | 19645  | Rb1        | Rb Rb-1 p  |
| chr8  | 42138752 | 42139025 | intron (NM intron (NM  | 1262    | NM_00100  | 102103 | Mtus1      | AI481402 , |
| chr14 | 32898727 | 32898825 | promoter-1promoter-1   | 102     | NR_10430: | 105638 | Dph3       | DELGIP1 D  |
| chr5  | 97341477 | 97341550 | Intergenic CT-rich Lov | -85195  | NM_08070  | 140780 | Bmp2k      | 4933417M   |
| chr8  | 1.27E+08 | 1.27E+08 | exon (NM_exon (NM_     | 144     | NM_13927  | 108148 | Galnt2     | AI480629   |
| chr14 | 33326877 | 33327075 | intron (NM CpG         | 269     | NM_00108  | 319955 | Ercc6      | 4732403IO: |
| chr18 | 73731527 | 73731725 | promoter-1promoter-1   | -733    | NM_00103  | 240396 | Mex3c      | A130001D:  |
| chr3  | 97871727 | 97871900 | intron (NM intron (NM  | 54352   | NM_01092  | 18129  | Notch2     | AI853703   |
| chr1  | 97458502 | 97458675 | Intergenic Intergenic  | 105583  | NM_00918  | 20452  | St8sia4    | PST PST-1  |
| chr2  | 1.43E+08 | 1.43E+08 | Intergenic Intergenic  | -1801   | NM_00108  | 16558  | Kif16b     | 8430434E1  |
| chr1  | 87584127 | 87584350 | intron (NM B4A SINE    | 37613   | NM_01367  | 20684  | Sp100      | A430075G:  |
| chr8  | 47461452 | 47461650 | Intergenic L1MB3 LIN   | -81526  | NM_17378  | 234219 | Helt       | A830086M   |
| chr7  | 30858027 | 30858100 | promoter-1promoter-1   | -221    | NM_00125  | 330502 | Zfp82      | A030010DC  |
| chr9  | 99324227 | 99324375 | intron (NM intron (NM  | 12830   | NM_00862  | 17532  | Mras       | 2900078CC  |
| chr1  | 75207477 | 75207675 | promoter-1promoter-1   | 172     | NM_01149  | 20872  | Stk16      | EDPK Krcr  |



|       |          |          |                        |         |          |        |                     |            |
|-------|----------|----------|------------------------|---------|----------|--------|---------------------|------------|
| chr1  | 1.74E+08 | 1.74E+08 | promoter-1promoter-1   | 54      | NM_02160 | 59287  | Ncstn               | 9430068N1  |
| chr4  | 1.33E+08 | 1.33E+08 | exon (NM_exon (NM_     | 103     | NM_17287 | 242691 | Gpatch3             | D930035BC  |
| chr7  | 26465077 | 26465350 | promoter-1promoter-1   | -964    | NM_17214 | 232987 | B9d2                | stumpy     |
| chr18 | 3004377  | 3004525  | Intergenic CT-rich Lov | 118961  | NM_00116 | 1E+08  | Vmn1r238            | -          |
| chr14 | 56291052 | 56291325 | promoter-1promoter-1   | 116     | NM_17799 | 105446 | Gmpr2               | 1810008P1  |
| chr12 | 88812827 | 88813150 | intron (NM CpG         | 261     | NM_02550 | 66354  | Snw1                | 2310008BC  |
| chr7  | 1.1E+08  | 1.1E+08  | exon (NM_exon (NM_     | 350     | NM_14638 | 258378 | Olfr593             | MOR24-2    |
| chr14 | 47984727 | 47984800 | Intergenic Intergenic  | -8772   | NM_01070 | 16854  | Lgals3              | GBP L-34   |
| chr5  | 1.46E+08 | 1.46E+08 | promoter-1promoter-1   | 207     | NM_00103 | 231887 | Pdap1               | HASPP28 F  |
| chr18 | 63851427 | 63851725 | intron (NM CpG         | 437     | NM_01679 | 53382  | Txn1                | 32kDa TRP  |
| chr9  | 1.1E+08  | 1.1E+08  | intron (NM CpG         | 612     | NM_00108 | 235626 | Setd2               | 4921524K1  |
| chrX  | 1.04E+08 | 1.04E+08 | Intergenic Intergenic  | 29522   | NM_17544 | 213438 | A630033H;AI662791 I |            |
| chr17 | 74927902 | 74928025 | exon (NM_exon (NM_     | 328     | NM_00756 | 12211  | Birc6               | A430032G(  |
| chr3  | 65327427 | 65327650 | Intergenic Intergenic  | -4831   | NM_17889 | 99929  | Tiparp              | ARTD14 A'  |
| chr6  | 1.28E+08 | 1.28E+08 | intron (NM intron (NM  | 4633    | NM_00103 | 381812 | Cracr2a             | Efcab4b Gi |
| chr3  | 88420827 | 88421075 | intron (NM intron (NM  | 822     | NM_00119 | 16800  | Arhgef2             | AA408978   |
| chr16 | 16571577 | 16571700 | Intergenic Intergenic  | -11349  | NM_13923 | 224014 | Fgd4                | 9030023J0  |
| chr5  | 1.24E+08 | 1.24E+08 | exon (NM_exon (NM_     | 165     | NM_00113 | 208908 | Ccdc62              | AI661708 f |
| chr12 | 1.07E+08 | 1.07E+08 | intron (NM CpG         | 353     | NM_00102 | 22367  | Vrk1                | 51PK       |
| chr18 | 39825952 | 39826375 | Intergenic Intergenic  | -106988 | NM_01103 | 18459  | Pabpc2              | Pabp Pabp  |
| chr5  | 21290752 | 21291025 | promoter-1promoter-1   | 95      | NM_00958 | 22791  | Dnajc2              | AU020218   |
| chr5  | 29704927 | 29705775 | promoter-1promoter-1   | -421    | NM_02029 | 56873  | Lmbr1               | 1110048D1  |
| chr14 | 61376377 | 61376475 | intron (NM intron (NM  | -10545  | NM_18317 | 239126 | C1qtnf9             | 9130217G2  |
| chr1  | 1.59E+08 | 1.59E+08 | promoter-1promoter-1   | -43     | NM_02314 | 30935  | Tor3a               | Adir       |
| chr1  | 1.66E+08 | 1.66E+08 | intron (NM intron (NM  | 4794    | NM_00116 | 20343  | Sell                | AI528707 f |
| chr6  | 1.13E+08 | 1.13E+08 | promoter-1promoter-1   | 131     | NM_17510 | 66087  | Emc3                | 0610039A1  |
| chr10 | 17417627 | 17417925 | Intergenic Intergenic  | -25258  | NM_01082 | 17684  | Cited2              | AI835299 I |
| chr4  | 58926502 | 58926775 | Intergenic ORR1D2 L'   | -1041   | NM_17238 | 230249 | AI314180            | AW558785   |
| chr17 | 56899902 | 56900025 | Intergenic Intergenic  | -3010   | NM_00873 | 18188  | Nrtn                | NTN        |
| chr13 | 59660002 | 59660225 | Intergenic Intergenic  | -1405   | NM_02332 | 67269  | Agtppb1             | 1700020N1  |
| chr10 | 33739677 | 33739850 | promoter-1promoter-1   | -341    | NM_02561 | 66521  | Rwdd1               | 0710001KC  |
| chr10 | 24589802 | 24590000 | 5' UTR (NM 5' UTR (NM  | 109     | NM_02734 | 70208  | Med23               | 130kDa 30  |
| chr11 | 69225002 | 69225150 | intron (NM CpG         | 2101    | NM_00101 | 216850 | Kdm6b               | 1700064E0  |
| chr5  | 1.49E+08 | 1.49E+08 | Intergenic Intergenic  | -16724  | NM_01022 | 14254  | Flt1                | AI323757 I |
| chr8  | 36271402 | 36271500 | Intergenic Intergenic  | -167344 | NM_17774 | 244416 | Ppp1r3b             | 6430576E2  |
| chr5  | 24082802 | 24083025 | intron (NM CpG         | 372     | NM_00119 | 27407  | Abcf2               | 0710005OC  |
| chr1  | 1.33E+08 | 1.33E+08 | intron (NM intron (NM  | 45392   | NM_01070 | 16865  | Eif2d               | D1Ert5e I  |
| chr2  | 1.78E+08 | 1.78E+08 | promoter-1promoter-1   | 155     | NM_00108 | 228966 | Ppp1r3d             | 2610024M   |
| chr13 | 98801452 | 98801625 | intron (NM intron (NM  | 174582  | NM_01202 | 110596 | Arhgef28            | 9230110L0  |
| chr13 | 3536527  | 3536600  | promoter-1promoter-1   | -758    | NM_00811 | 14569  | Gdi2                | GDI-B GDII |
| chr11 | 76296252 | 76296325 | intron (NM intron (NM  | -14321  | NM_00129 | 109934 | Abr                 | -          |
| chr1  | 1.4E+08  | 1.4E+08  | Intergenic Intergenic  | 54023   | NM_17739 | 338375 | Atp6v1g3            | -          |
| chr16 | 22315877 | 22316025 | Intergenic Intergenic  | -49949  | NM_00918 | 20462  | Tra2b               | 5730405G2  |
| chr16 | 8637702  | 8638100  | promoter-1promoter-1   | 101     | NM_01688 | 54128  | Pmm2                | AI585868 f |
| chrY  | 2788752  | 2788950  | Intergenic Intergenic  | 401593  | NM_00127 | 1E+08  | Gm3376              | Rbmy1b     |
| chr3  | 94385552 | 94385625 | intron (NM intron (NM  | 1050    | NM_00108 | 76742  | Snx27               | 5730552M   |
| chr1  | 16678277 | 16678450 | promoter-1promoter-1   | -174    | NM_00115 | 17087  | Ly96                | ESOP-1 MI  |

|       |          |          |                       |        |          |        |          |            |
|-------|----------|----------|-----------------------|--------|----------|--------|----------|------------|
| chr7  | 36340552 | 36340850 | exon (NM_exon (NM_    | 246    | NM_03308 | 110959 | Nudt19   | D7Rp2 D7I  |
| chr1  | 44204302 | 44204525 | promoter-1promoter-1  | -176   | NM_01172 | 22592  | Ercc5    | Xpg        |
| chr15 | 59510727 | 59511050 | Intergenic MIR SINE   | 30679  | NM_14454 | 211770 | Trib1    | A5300900:  |
| chr1  | 94113352 | 94113425 | Intergenic ID_B1 SINI | -68418 | NM_20722 | 208727 | Hdac4    | 4932408F1  |
| chr1  | 1.73E+08 | 1.73E+08 | exon (NM_exon (NM_    | 229    | NM_01948 | 56009  | Alyref2  | C130042O:  |
| chr2  | 1.5E+08  | 1.5E+08  | Intergenic Intergenic | 127101 | NM_02326 | 104348 | Zfp120   | AI315103   |
| chr4  | 1.3E+08  | 1.3E+08  | Intergenic Intergenic | -7151  | NM_00129 | 230775 | Bai2     | -          |
| chr19 | 12531977 | 12532100 | Intergenic Intergenic | -3231  | NM_01082 | 17476  | Mpeg1    | MPS1 Mpg   |
| chr15 | 90054327 | 90054525 | promoter-1promoter-1  | -316   | NM_00103 | 380959 | Alg10b   | AA469671   |
| chr3  | 85654027 | 85654300 | Intergenic MER2 DNA   | 37277  | NM_17713 | 320302 | Glt28d2  | 4732486JO  |
| chr6  | 83817502 | 83817725 | Intergenic Intergenic | -35878 | NM_14616 | 232164 | Paip2b   | -          |
| chr13 | 89879402 | 89879650 | intron (NM intron (NM | 2591   | NM_00108 | 13003  | Vcan     | 5430420NC  |
| chr19 | 37494527 | 37494800 | intron (NM intron (NM | -14668 | NM_00824 | 15242  | Hhex     | Hex Hex1   |
| chr12 | 11184427 | 11184550 | Intergenic Intergenic | -26840 | NM_00116 | 238076 | Kcns3    | -          |
| chr9  | 74918877 | 74919475 | 5' UTR (NM 5' UTR (NV | 163    | NM_01086 | 17918  | Myo5a    | 9630007J1: |
| chr9  | 1.09E+08 | 1.09E+08 | intron (NM intron (NM | 4491   | NM_17301 | 270198 | Pfkfb4   | C230090D1  |
| chr12 | 74816852 | 74817075 | intron (NM intron (NM | 130935 | NM_00885 | 18755  | Prkch    | Pkch       |
| chr11 | 1.02E+08 | 1.02E+08 | intron (NM intron (NM | 355    | NM_02654 | 68066  | Slc25a39 | 3010027G1  |
| chr11 | 34659527 | 34659850 | Intergenic Intergenic | -12545 | NM_02741 | 70385  | Spdl1    | 1700018IO: |
| chr16 | 17531477 | 17531550 | promoter-1promoter-1  | -368   | NM_02690 | 69009  | Thap7    | 1810004BC  |
| chr16 | 32277602 | 32277700 | 5' UTR (NM 5' UTR (NV | 104    | NM_02735 | 70238  | Rnf168   | 3110001H1  |
| chr13 | 46072827 | 46072975 | Intergenic Intergenic | -12541 | NM_00912 | 20238  | Atxn1    | 2900016G2  |
| chr12 | 80336402 | 80336750 | intron (NM intron (NM | 26675  | NM_03001 | 77974  | Rdh12    | A930033NC  |
| chr2  | 32568152 | 32568350 | promoter-1promoter-1  | 53     | NM_13086 | 107951 | Cdk9     | PITALRE    |
| chr14 | 27783252 | 27783575 | intron (NM CpG        | 324    | NM_14522 | 72993  | Appl1    | 2900057D2  |
| chr15 | 40655852 | 40656025 | intron (NM intron (NM | 169350 | NM_01176 | 22762  | Zfpm2    | B330005D2  |
| chr15 | 35085177 | 35085300 | intron (NM CpG        | 323    | NM_01963 | 56274  | Stk3     | 0610042IO: |
| chr6  | 99724677 | 99724925 | Intergenic Intergenic | -48415 | NM_00117 | 50501  | Prok2    | Bv8 PK2 P  |
| chr14 | 60210952 | 60211225 | intron (NM intron (NM | 5708   | NM_00116 | 71891  | Cdadc1   | 2310010M   |
| chr6  | 60916977 | 60917275 | intron (NM intron (NM | 22815  | NM_00116 | 70945  | Mmrn1    | 4921530GC  |
| chr8  | 64390177 | 64390450 | Intergenic Intergenic | -8822  | NM_00129 | 72333  | Palld    | 2410003B1  |
| chr8  | 1.09E+08 | 1.09E+08 | intron (NM intron (NM | -21040 | NM_01090 | 18021  | Nfatc3   | C80703 DE  |
| chr9  | 37015827 | 37016075 | promoter-1promoter-1  | 33     | NM_02546 | 66279  | Tmem218  | 1810021J1: |
| chr9  | 1.1E+08  | 1.1E+08  | Intergenic Intergenic | -37378 | NM_00101 | 382106 | Fbxw24   | EG382106   |
| chr13 | 89879302 | 89879375 | intron (NM CpG        | 2779   | NM_00108 | 13003  | Vcan     | 5430420NC  |
| chr2  | 1.64E+08 | 1.64E+08 | Intergenic Intergenic | -16213 | NM_00127 | 11486  | Ada      | -          |
| chr9  | 96853077 | 96853325 | intron (NM intron (NM | -63308 | NM_00128 | 235534 | Pxylp1   | 9430094M   |
| chr14 | 66480077 | 66480225 | intron (NM intron (NM | 24012  | NM_14594 | 67179  | Ccdc25   | 2610528H1  |
| chr18 | 35118227 | 35118850 | Intergenic Intergenic | -4533  | NM_01048 | 15526  | Hspa9    | 74kDa Csa  |
| chr17 | 27956702 | 27957100 | intron (NM intron (NM | 586    | NM_00103 | 224647 | D17Wsu92 | AU020189   |
| chr12 | 1.19E+08 | 1.19E+08 | Intergenic Intergenic | -6358  | NM_14604 | 217946 | Cdca7l   | BC006933   |
| chr3  | 90293677 | 90293775 | intron (NM intron (NM | 1209   | NM_13385 | 20615  | Snapin   | 25kDa AA4  |
| chr2  | 76477802 | 76477875 | intron (NM intron (NM | 8213   | NM_01187 | 23992  | Prkra    | AV120107   |
| chr7  | 1.15E+08 | 1.15E+08 | promoter-1promoter-1  | -914   | NM_00890 | 19024  | Ppfibp2  | Cclp1      |
| chr9  | 70587852 | 70588150 | intron (NM intron (NM | 61193  | NM_00739 | 11487  | Adam10   | 1700031C1  |
| chr11 | 99092427 | 99092575 | promoter-1promoter-1  | -170   | NM_02061 | 57376  | Smarce1  | 2810417B2  |
| chr12 | 74405777 | 74405975 | intron (NM intron (NM | 18041  | NM_00103 | 625098 | Slc38a6  | AW322671   |

|       |          |          |            |            |        |          |        |            |             |
|-------|----------|----------|------------|------------|--------|----------|--------|------------|-------------|
| chr5  | 1.51E+08 | 1.51E+08 | intron (NM | intron (NM | 1762   | NM_13389 | 100637 | N4bp211    | 2410024N1   |
| chr5  | 3388752  | 3388950  | intron (NM | intron (NM | 44539  | NM_00987 | 12571  | Cdk6       | 5830411I2(  |
| chr2  | 1.12E+08 | 1.12E+08 | intron (NM | CpG        | 294    | NM_13374 | 73024  | Emc7       | 2900064A1   |
| chr13 | 1.02E+08 | 1.02E+08 | intron (NM | CpG        | 278    | NM_02188 | 26886  | Cenph      | 17000211I:  |
| chr10 | 1.27E+08 | 1.27E+08 | promoter-1 | promoter-1 | -332   | NM_14601 | 216445 | Arhgap9    | AU043488    |
| chr7  | 1.01E+08 | 1.01E+08 | Intergenic | L1_Mur1 L  | 537262 | NM_02142 | 58238  | Fam181b    | A830059I2   |
| chr6  | 81873727 | 81873850 | exon (NM_  | exon (NM_  | 125    | NM_17788 | 330361 | Gcfc2      | A130099G:   |
| chr8  | 60723652 | 60723725 | intron (NM | URR1A DN   | 455905 | NM_00117 | 1E+08  | Gm15881    | OTTMUSG(    |
| chr11 | 89931702 | 89931800 | Intergenic | Lx8 LINE L | 40089  | NM_02643 | 67888  | Tmem100    | 1810057C1   |
| chr8  | 85875252 | 85875475 | intron (NM | intron (NM | 2992   | NM_02623 | 67555  | Mgat4d     | 4933434I2(  |
| chr4  | 1.33E+08 | 1.33E+08 | Intergenic | Intergenic | 59945  | NM_00128 | 20111  | Rps6ka1    | Mapkapk-1   |
| chr10 | 1.28E+08 | 1.28E+08 | intron (NM | intron (NM | 1630   | NM_00108 | 210582 | Coq10a     | Gm1         |
| chr11 | 1.03E+08 | 1.03E+08 | intron (NM | CpG-2675   | 13410  | NM_00111 | 11488  | Adam11     | AW060611    |
| chr4  | 53795202 | 53795300 | intron (NM | intron (NM | 2674   | NM_00931 | 21350  | Tal2       | bHLHa19     |
| chr6  | 95668477 | 95668700 | intron (NM | CpG        | 252    | NM_01150 | 20917  | Suclg2     | AF171077    |
| chr3  | 58218777 | 58218900 | promoter-1 | promoter-1 | -773   | NM_00108 | 72033  | Tsc22d2    | 1810043J1   |
| chr18 | 36919502 | 36919600 | promoter-1 | promoter-1 | -342   | NM_02646 | 67936  | Wdr55      | 2410080P2   |
| chr8  | 28238827 | 28239225 | promoter-1 | promoter-1 | 78     | NM_02568 | 66653  | Brf2       | 2700059M    |
| chr9  | 1.03E+08 | 1.03E+08 | promoter-1 | promoter-1 | 58     | NM_00113 | 321022 | Cdv3       | 2510010F1   |
| chr5  | 1.38E+08 | 1.38E+08 | promoter-1 | promoter-1 | -149   | NM_00110 | 83701  | Srrt       | 2810019G(   |
| chr1  | 1.8E+08  | 1.8E+08  | Intergenic | RLTR25A L  | -18694 | NM_02707 | 69428  | 1700016C1- |             |
| chr2  | 1.19E+08 | 1.19E+08 | promoter-1 | promoter-1 | -323   | NM_17715 | 320415 | Gchfr      | 2010323F1   |
| chr3  | 58495552 | 58495725 | promoter-1 | promoter-1 | 672    | NM_00917 | 20439  | Siah2      | AA415433    |
| chr2  | 1.43E+08 | 1.43E+08 | promoter-1 | promoter-1 | 33     | NM_02133 | 20639  | Snrpb2     | 2810052G(   |
| chr14 | 79880677 | 79880825 | promoter-1 | promoter-1 | -250   | NM_00792 | 13709  | Elf1       | Elf-1 Sts1  |
| chr9  | 32317352 | 32317775 | intron (NM | intron (NM | 31474  | NM_00802 | 14247  | Fli1       | EWRSR2 Fli- |
| chr11 | 1.14E+08 | 1.14E+08 | Intergenic | (TTC)n Sim | -99481 | NM_02337 | 67671  | Rpl38      | 0610025G1   |
| chr15 | 76198877 | 76199050 | promoter-1 | promoter-1 | -365   | NM_02155 | 59053  | Hgh1       | Brp16 D15   |
| chr7  | 51723527 | 51723650 | TTS (NM_0  | TTS (NM_0  | 238    | NM_00120 | 66124  | Josd2      | 1110007CC   |
| chr4  | 73951477 | 73951900 | intron (NM | intron (NM | 53905  | NM_14478 | 76804  | Kdm4c      | 2410141F1   |
| chr2  | 1.48E+08 | 1.48E+08 | exon (NM_  | exon (NM_  | 1108   | NM_01074 | 17064  | Cd93       | 6030404G(   |
| chr6  | 52811077 | 52811675 | intron (NM | intron (NM | 48238  | NM_00116 | 231986 | Jazf1      | AI591476 I  |
| chr11 | 53114377 | 53114450 | promoter-1 | promoter-1 | -432   | NM_00830 | 15525  | Hspa4      | 70kDa AI3   |
| chr1  | 34899952 | 34900125 | promoter-1 | promoter-1 | -143   | NM_17499 | 214469 | Fam168b    | mKIAA404:   |
| chr2  | 27330627 | 27330775 | 5' UTR (NV | 5' UTR (NV | 217    | NM_02333 | 67382  | Brd3       | 2410084F2   |
| chr10 | 79785552 | 79785950 | exon (NM_  | exon (NM_  | -2458  | NM_02552 | 66374  | 2310011J0  | AI452186 ,  |
| chr1  | 1.29E+08 | 1.29E+08 | intron (NM | intron (NM | 38425  | NM_14512 | 107895 | Mgat5      | 4930471A2   |
| chr14 | 20570402 | 20570500 | promoter-1 | promoter-1 | -28    | NM_00869 | 18074  | Nid2       | AW547149    |
| chr3  | 87371402 | 87371900 | Intergenic | Intergenic | 42151  | NM_01205 | 27049  | Etv3       | AI414410 I  |
| chr5  | 1.4E+08  | 1.4E+08  | intron (NM | B2_Mm1a    | 34454  | NM_17552 | 243312 | Elfn1      | A930017N(   |
| chr10 | 79479552 | 79479700 | exon (NM_  | exon (NM_  | 209    | NM_00114 | 70719  | Hmha1      | 6330406L2   |
| chr4  | 1.35E+08 | 1.35E+08 | promoter-1 | promoter-1 | -234   | NM_17485 | 242700 | Ifnlr1     | CRF2-12 II: |
| chr13 | 1.05E+08 | 1.05E+08 | Intergenic | L1ME3A LI  | 206607 | NM_02607 | 67285  | Cwc27      | 3110009E1   |
| chr6  | 1.29E+08 | 1.29E+08 | intron (NM | intron (NM | 1244   | NM_02000 | 56644  | Clec7a     | BGR Clec3f  |
| chr12 | 75009102 | 75009200 | 5' UTR (NV | 5' UTR (NV | 297    | NM_01043 | 15251  | Hif1a      | AA959795    |
| chr19 | 37999927 | 38000125 | intron (NM | MIRc SINE  | 118041 | NM_00109 | 226101 | Myof       | 2310004N1   |
| chr2  | 90686927 | 90687000 | promoter-1 | promoter-1 | -349   | NM_01975 | 56428  | Mtch2      | 2310034D:   |

|       |          |          |            |            |         |          |        |            |            |
|-------|----------|----------|------------|------------|---------|----------|--------|------------|------------|
| chr2  | 1.8E+08  | 1.8E+08  | promoter-1 | promoter-1 | 656     | NM_00128 | 26444  | Psma7      | C6-I       |
| chr7  | 1.18E+08 | 1.18E+08 | promoter-1 | promoter-1 | -417    | NM_17732 | 319934 | Sbf2       | 4833411BC  |
| chr5  | 77615427 | 77615525 | Intergenic | Intergenic | 24754   | NM_00128 | 69982  | Spink2     | 1700007F2  |
| chr2  | 35056052 | 35056275 | intron (NM | CpG        | 477     | NM_02669 | 68365  | Rab14      | 0610030G2  |
| chr17 | 46008977 | 46009175 | Intergenic | Intergenic | -138283 | NM_02816 | 72240  | 1600014C2- |            |
| chr10 | 20871552 | 20871650 | intron (NM | intron (NM | 9189    | NM_00119 | 17863  | Myb        | AI550390 I |
| chr9  | 67626427 | 67626650 | Intergenic | Intergenic | 19294   | NM_00108 | 75697  | C2cd4b     | 3300001AC  |
| chr17 | 24687227 | 24687325 | exon (NM_  | exon (NM_  | 381     | NM_01363 | 18763  | Pkd1       | PC1 mFLJO  |
| chr15 | 82953002 | 82953075 | intron (NM | CpG        | 193     | NM_02910 | 74778  | Rrp7a      | 1110014JO  |
| chr18 | 56895602 | 56895700 | intron (NM | intron (NM | 28184   | NM_01072 | 16906  | Lmnb1      | -          |
| chr2  | 1.65E+08 | 1.65E+08 | intron (NM | CpG        | 349     | NM_19902 | 329559 | Zfp335     | 1810045JO  |
| chr1  | 95714827 | 95715050 | 3' UTR (NV | 3' UTR (NV | -6879   | NM_17888 | 98314  | D2hgdh     | AA408776   |
| chr11 | 1.2E+08  | 1.2E+08  | promoter-1 | promoter-1 | 80      | NM_00103 | 66156  | Anapc11    | 111001111! |
| chr1  | 95645227 | 95645300 | intron (NM | intron (NM | 6152    | NM_02592 | 67026  | Thap4      | 2010320BC  |
| chr3  | 21976127 | 21976375 | intron (NM | intron (NM | 677     | NM_03073 | 81004  | Tbl1xr1    | 8030499HC  |
| chr14 | 31528552 | 31528700 | promoter-1 | promoter-1 | -175    | NM_00116 | 54650  | Sfmbt1     | 4930442N2  |
| chr7  | 1.41E+08 | 1.41E+08 | intron (NM | intron (NM | 193167  | NM_00740 | 11489  | Adam12     | Mltna mKI  |
| chr19 | 43748327 | 43748525 | intron (NM | intron (NM | 945     | NM_14515 | 246696 | Slc25a28   | 2210403D1  |
| chr1  | 20880727 | 20880800 | promoter-1 | promoter-1 | 60      | NM_02882 | 74229  | Paqr8      | 1700019B1  |
| chr3  | 1.31E+08 | 1.31E+08 | Intergenic | Intergenic | -88644  | NM_00128 | 23971  | Papss1     | AI325286 , |
| chr5  | 1.22E+08 | 1.22E+08 | intron (NM | CpG        | 135     | NM_17272 | 231713 | Naa25      | 4833422K1  |
| chr16 | 52371977 | 52372475 | intron (NM | intron (NM | 80884   | NM_00965 | 11658  | Alcam      | AI853494 I |
| chr1  | 88367002 | 88367250 | Intergenic | Intergenic | 44222   | NM_02796 | 71863  | 1700019O:- |            |
| chr16 | 44984977 | 44985250 | Intergenic | Intergenic | 41322   | NM_00112 | 74603  | Cd200r3    | 473340111! |
| chr1  | 1.33E+08 | 1.33E+08 | 3' UTR (NV | 3' UTR (NV | -7073   | NM_01977 | 56489  | lkbke      | AW558201   |
| chr9  | 65308802 | 65308925 | 5' UTR (NV | 5' UTR (NV | 119     | NM_13858 | 27965  | Spg21      | ACP33 BM   |
| chr19 | 25054252 | 25054350 | Intergenic | MLT1B LTF  | -18195  | NM_14609 | 226043 | Cbwd1      | AV349248   |
| chr10 | 87853177 | 87853350 | intron (NM | intron (NM | 11106   | NM_00100 | 432486 | Gnptab     | EG432486   |
| chr10 | 9620802  | 9620950  | promoter-1 | promoter-1 | -38     | NM_00108 | 78808  | Stxbp5     | 0710001E2  |
| chr2  | 90929752 | 90930075 | Intergenic | L1MC LINE  | -7041   | NM_01135 | 20375  | Spi1       | Dis-1 Dis1 |
| chr11 | 98802877 | 98803100 | intron (NM | intron (NM | 1963    | NM_00117 | 19401  | Rara       | Nr1b1 RAF  |
| chr3  | 95032327 | 95032525 | promoter-1 | promoter-1 | 80      | NM_17239 | 57912  | Cdc42se1   | 1300002M   |
| chr3  | 9725352  | 9725825  | intron (NM | intron (NM | 108091  | NM_05318 | 94212  | Pag1       | Cbp F7300  |
| chr2  | 1.56E+08 | 1.56E+08 | promoter-1 | promoter-1 | -283    | NM_02758 | 70873  | Cnbd2      | 4921517L1  |
| chr7  | 31197952 | 31198075 | promoter-1 | promoter-1 | -794    | NM_01166 | 22177  | Tyrobp     | DAP12 KAI  |
| chr6  | 53075027 | 53075275 | Intergenic | MER63B D   | -56533  | NM_17340 | 231986 | Jazf1      | AI591476 ! |
| chr5  | 1.46E+08 | 1.46E+08 | promoter-1 | promoter-1 | -112    | NM_02314 | 11867  | Arpc1b     | 41kDa AA4  |
| chr1  | 1.09E+08 | 1.09E+08 | 5' UTR (NV | 5' UTR (NV | 354     | NM_00974 | 12043  | Bcl2       | AW986256   |
| chr12 | 1.13E+08 | 1.13E+08 | intron (NM | CpG-3536   | 248     | NM_02127 | 12709  | Ckb        | B-CK Bck ! |
| chr3  | 89085127 | 89085525 | promoter-1 | promoter-1 | -453    | NM_00116 | 13636  | Efna1      | AI325262 I |
| chr2  | 32115352 | 32115525 | exon (NM_  | exon (NM_  | 187     | NM_01167 | 22245  | Uck1       | URK1 Ump   |
| chr4  | 61926577 | 61926750 | Intergenic | Intergenic | -20800  | NM_02528 | 20530  | Slc31a2    | AI604396 ! |
| chr2  | 1.64E+08 | 1.64E+08 | exon (NM_  | exon (NM_  | 413     | NM_13377 | 78928  | Pigt       | 2510012P1  |
| chr16 | 16066477 | 16066625 | intron (NM | Lx8 LINE L | 80393   | NM_14606 | 224008 | Spidr      | 2310008HC  |
| chr1  | 1.62E+08 | 1.62E+08 | intron (NM | ID4 SINE I | -2699   | NM_00103 | 29809  | Rabgap1!   | 5830411OC  |
| chr2  | 34682227 | 34682300 | promoter-1 | promoter-1 | -508    | NM_00116 | 30050  | Fbxw2      | 2700071L0  |
| chr6  | 1.15E+08 | 1.15E+08 | intron (NM | intron (NM | 8587    | NM_00112 | 19016  | Pparg      | Nr1c3 PPA  |

|       |          |          |             |             |         |          |        |           |            |
|-------|----------|----------|-------------|-------------|---------|----------|--------|-----------|------------|
| chr15 | 77759177 | 77759300 | intron (NM  | intron (NM  | 186     | NM_01991 | 56551  | Txn2      | 2510006J1  |
| chr1  | 1.95E+08 | 1.95E+08 | Intergenic  | Intergenic  | -1281   | NM_00805 | 14373  | G0s2      | AI255151   |
| chr7  | 88344002 | 88344175 | Intergenic  | MLT1L LTR   | -14602  | NM_00880 | 18584  | Pde8a     | AI551852   |
| chr1  | 1.58E+08 | 1.58E+08 | Intergenic  | Intergenic  | -19197  | NM_00102 | 104009 | Qsox1     | 1300003HC  |
| chr6  | 21908952 | 21909350 | intron (NM  | Lx9 LINE L  | 9536    | NM_02362 | 71777  | Ing3      | 1300013AC  |
| chr7  | 1.33E+08 | 1.33E+08 | Intergenic  | Intergenic  | -20570  | NM_02633 | 67711  | Nsmce1    | 2510027N1  |
| chr12 | 96987377 | 96987575 | intron (NM  | intron (NM  | 57040   | NM_20151 | 399558 | Flrt2     | -          |
| chr1  | 1.35E+08 | 1.35E+08 | Intergenic  | Intergenic  | -7638   | NM_00857 | 17248  | Mdm4      | 4933417NC  |
| chr16 | 84735277 | 84735500 | intron (NM  | intron (NM  | 159     | NM_01740 | 27393  | Mrpl39    | C21orf8 M  |
| chr17 | 65024352 | 65024575 | exon (NM_   | exon (NM_   | 73474   | NM_00854 | 17158  | Man2a1    | Mana-2 M   |
| chr18 | 9449677  | 9449900  | 5' UTR (NM  | 5' UTR (NM  | 360     | NM_02648 | 67974  | Ccny      | 1700025H1  |
| chr2  | 1.15E+08 | 1.15E+08 | intron (NM  | intron (NM  | 311     | NM_00114 | 399568 | BC052040  | -          |
| chr2  | 44972302 | 44972375 | Intergenic  | Intergenic  | -3539   | NM_01575 | 24136  | Zeb2      | 9130203FO  |
| chr11 | 22908027 | 22908250 | Intergenic  | Intergenic  | -5249   | NM_02867 | 73873  | Fam161a   | 4930430E1  |
| chr15 | 79272052 | 79272775 | promoter-1  | promoter-1  | 74      | NM_00128 | 27373  | Csnk1e    | AI426939   |
| chr1  | 36125477 | 36125850 | exon (NM_   | exon (NM_   | 418     | NM_01581 | 50785  | Hs6st1    | 6Ost1      |
| chr9  | 45625777 | 45625900 | intron (NM  | B3 SINE B.  | 10883   | NM_00108 | 214552 | Cep164    | AI450905   |
| chr11 | 54697752 | 54697850 | Intergenic  | B4 SINE B.  | 17861   | NM_00824 | 15254  | Hint1     | AA673479   |
| chr9  | 16403677 | 16403950 | Intergenic  | Intergenic  | -221138 | NM_00108 | 270120 | Fat3      | 9430076AC  |
| chr17 | 25410327 | 25411475 | promoter-1  | promoter-1  | -42     | NM_00117 | 22196  | Ube2i     | 5830467E0  |
| chr15 | 79572527 | 79572675 | promoter-1  | promoter-1  | 365     | NM_19434 | 223697 | Sun2      | B230369L0  |
| chr9  | 75209977 | 75210300 | Intergenic  | Intergenic  | 14573   | NM_01347 | 12049  | Bcl2l10   | AA420380   |
| chr17 | 74694777 | 74694875 | promoter-1  | promoter-1  | -623    | NM_13377 | 76890  | Memo1     | 0610016J1  |
| chr2  | 1.8E+08  | 1.8E+08  | intron (NM  | intron (NM  | 8517    | NM_14450 | 228983 | Osbp12    | C130070J1  |
| chr2  | 38499402 | 38499475 | promoter-1  | promoter-1  | -12     | NM_01118 | 19177  | Psmb7     | AU020723   |
| chr8  | 1.09E+08 | 1.09E+08 | intron (NM  | intron (NM  | 17988   | NM_00922 | 20650  | Sntb2     | Snt2       |
| chr2  | 1.21E+08 | 1.21E+08 | intron (NM  | CpG         | 140     | NM_02689 | 68968  | Cdan1     | 1500015AC  |
| chr11 | 44332002 | 44332250 | promoter-1  | promoter-1  | -340    | NM_02886 | 74315  | Rnf145    | 373241311: |
| chr1  | 94926077 | 94926300 | intron (NM  | intron (NM  | 23277   | NM_00115 | 208760 | Aqp12     | AB084104   |
| chr8  | 47060377 | 47060575 | promoter-1  | promoter-1  | 130     | NM_00103 | 69479  | 1700029J0 | -          |
| chr14 | 99447902 | 99448000 | intron (NM  | intron (NM  | 2355    | NM_17526 | 77744  | Bora      | 6720463M   |
| chr15 | 85188152 | 85188350 | intron (NM  | B1_Mur4 S   | 21440   | NM_01684 | 54138  | Atxn10    | AI325283   |
| chr13 | 1.12E+08 | 1.12E+08 | promoter-1  | promoter-1  | -539    | NM_00112 | 73274  | Gpbp1     | 1700034P1  |
| chr1  | 1.79E+08 | 1.79E+08 | intron (NM  | intron (NM  | 4297    | NM_02975 | 76816  | Sdccag8   | 2700048G2  |
| chr12 | 1.01E+08 | 1.01E+08 | Intergenic  | Intergenic  | -39329  | NM_18318 | 71375  | Foxn3     | 5430426H2  |
| chr11 | 21629027 | 21629400 | intron (NM  | intron (NM  | 156929  | NM_14542 | 216560 | Wdpcp     | AV249152   |
| chr2  | 1.8E+08  | 1.8E+08  | Intergenic  | Intergenic  | -23595  | NM_14893 | 108115 | Slco4a1   | OATP-E Slc |
| chr4  | 1.34E+08 | 1.34E+08 | intron (NR_ | intron (NR_ | 10680   | NM_08055 | 73723  | Sh3bgrl3  | 1110004L0  |
| chr11 | 98657577 | 98658050 | exon (NM_   | exon (NM_   | 730     | NM_02872 | 74026  | Msl1      | 2810017F1  |
| chr13 | 89967577 | 89967650 | Intergenic  | Intergenic  | -85496  | NM_00113 | 13003  | Vcan      | 5430420NC  |
| chr9  | 1.24E+08 | 1.24E+08 | Intergenic  | Intergenic  | 34373   | NM_00991 | 12771  | Ccr3      | CC-CKR3 C  |
| chr14 | 9005077  | 9005175  | intron (NM  | CpG         | 380     | NM_02422 | 68263  | Pdhb      | 2610103L0  |
| chr11 | 1.03E+08 | 1.03E+08 | intron (NM  | intron (NM  | 433     | NM_17780 | 328019 | Spata32   | 4933400CC  |
| chr17 | 70920202 | 70920475 | intron (NM  | intron (NM  | 9251    | NM_00112 | 224997 | Dlgap1    | 4933422O1  |
| chr9  | 45792102 | 45792175 | intron (NM  | intron (NM  | 816     | NM_00877 | 18475  | Pafah1b2  | AI747451   |
| chr16 | 55790552 | 55790650 | Intergenic  | Intergenic  | 31650   | NM_00115 | 80859  | Nfkbiz    | AA408868   |
| chr4  | 1.5E+08  | 1.5E+08  | intron (NM  | intron (NM  | 68582   | NM_17377 | 242773 | Slc45a1   | C230078B2  |

|       |          |          |            |            |         |          |        |           |            |
|-------|----------|----------|------------|------------|---------|----------|--------|-----------|------------|
| chr13 | 1.13E+08 | 1.13E+08 | intron (NM | intron (NM | 12365   | NM_01194 | 26401  | Map3k1    | MAPKKK1    |
| chr11 | 1.19E+08 | 1.19E+08 | Intergenic | CpG        | -17686  | NM_01392 | 30951  | Cbx8      | Pc3        |
| chr11 | 51670802 | 51671000 | promoter-1 | promoter-1 | 82      | NM_19929 | 76901  | Jade2     | 1200017K0  |
| chr2  | 71625027 | 71625225 | 5' UTR (NM | 5' UTR (NM | 130     | NM_00127 | 16403  | Itga6     | 503340100  |
| chr17 | 56147002 | 56147075 | Intergenic | Intergenic | -1586   | NM_02653 | 68047  | Mpnd      | E130307M0  |
| chr13 | 95746252 | 95746575 | 5' UTR (NM | 5' UTR (NM | 114     | NM_17259 | 218460 | Wdr41     | B830029I0  |
| chr8  | 72241177 | 72241425 | promoter-1 | promoter-1 | -500    | NM_00103 | 66869  | Zfp869    | 1200003I0  |
| chr9  | 64119002 | 64119150 | Intergenic | Intergenic | -10338  | NM_02537 | 66131  | Tipin     | 1110005AC  |
| chr9  | 1E+08    | 1E+08    | Intergenic | Intergenic | 47054   | NM_00103 | 213208 | Il20rb    | AV228068   |
| chr5  | 1.44E+08 | 1.44E+08 | intron (NM | intron (NM | 22590   | NM_17824 | 231861 | Tnrc18    | BC025631   |
| chr11 | 5607452  | 5607625  | exon (NM_  | exon (NM_  | 164     | NM_02608 | 64660  | Mrps24    | 3110030K2  |
| chr1  | 72275627 | 72275825 | Intergenic | Intergenic | -16845  | NM_00100 | 381269 | Mreg      | Gm974 W0   |
| chr7  | 1.34E+08 | 1.34E+08 | Intergenic | Intergenic | -2174   | NM_17890 | 101602 | Al467606  | -          |
| chr17 | 22498577 | 22498675 | promoter-1 | promoter-1 | 206     | NM_14548 | 224598 | Zfp758    | BC021442   |
| chr2  | 1.02E+08 | 1.02E+08 | intron (NM | CpG        | 1088    | NM_17518 | 72446  | Prr5l     | 2600010E0  |
| chr7  | 76243752 | 76243875 | Intergenic | Intergenic | -349689 | NM_02554 | 66412  | Arrrdc4   | 2410003CC  |
| chr2  | 37286627 | 37286700 | promoter-1 | promoter-1 | -224    | NM_14625 | 241322 | Zbtb6     | A830092L0  |
| chr19 | 58942302 | 58942425 | Intergenic | RMER19A    | -6889   | NM_17519 | 73442  | Hspa12a   | 1700063D1  |
| chr6  | 1.2E+08  | 1.2E+08  | intron (NM | intron (NM | 7711    | NM_00835 | 16172  | Il17ra    | AW538159   |
| chr4  | 86221277 | 86221525 | promoter-1 | promoter-1 | -176    | NM_17837 | 68441  | Rraga     | 1300010C1  |
| chr4  | 8672252  | 8672400  | intron (NM | intron (NM | 54773   | NM_00127 | 320790 | Chd7      | A730019I0  |
| chr11 | 48612852 | 48615025 | promoter-1 | promoter-1 | 76      | NM_00814 | 14694  | Gnb2l1    | AL033335   |
| chr4  | 88385052 | 88385200 | Intergenic | MTEa LTR   | -15646  | NM_00108 | 435791 | Gm13271   | lfnz OTTM  |
| chr12 | 53415827 | 53416050 | Intergenic | Intergenic | -201126 | NM_00970 | 11855  | Arhgap5   | p190-B p1  |
| chr4  | 1.55E+08 | 1.55E+08 | Intergenic | Intergenic | -2482   | NM_00116 | 14688  | Gnb1      | AA409223   |
| chr8  | 77727377 | 77727500 | Intergenic | Intergenic | -10405  | NM_02918 | 75141  | Rasd2     | 4930526B1  |
| chr17 | 18027152 | 18027250 | intron (NM | intron (NM | 2413    | NM_00803 | 14289  | Fpr2      | E330010I0  |
| chr15 | 59479052 | 59479125 | Intergenic | CpG        | -1121   | NM_14454 | 211770 | Trib1     | A530090O   |
| chr13 | 51739377 | 51739725 | Intergenic | Intergenic | -1050   | NM_02541 | 66197  | Cks2      | 1110038L1  |
| chr5  | 38430252 | 38430650 | promoter-1 | promoter-1 | -18     | NM_00128 | 71116  | Stx18     | 1810035L2  |
| chr2  | 1.64E+08 | 1.64E+08 | Intergenic | Intergenic | -16308  | NM_01141 | 20568  | Sipi      | -          |
| chr15 | 25199202 | 25199350 | Intergenic | Intergenic | 144243  | NM_02739 | 70350  | Basp1     | 2610024P1  |
| chr8  | 1.08E+08 | 1.08E+08 | intron (NM | intron (NM | 15859   | NM_02648 | 67971  | Tppp3     | 2700055K0  |
| chr3  | 1.21E+08 | 1.21E+08 | intron (NM | intron (NM | 9657    | NM_00103 | 619318 | 4930432M  | -          |
| chr13 | 91819777 | 91820200 | intron (NM | intron (NM | -61138  | NM_02879 | 74156  | Acot12    | 1300004O0  |
| chr1  | 1.84E+08 | 1.84E+08 | intron (NM | intron (NM | 2819    | NM_13381 | 98386  | Lbr       | AI505894 i |
| chr7  | 28459327 | 28460175 | promoter-1 | promoter-1 | 71      | NM_19841 | 112415 | C030039L0 | -          |
| chr16 | 35769202 | 35769300 | exon (NM_  | exon (NM_  | 191     | NM_15355 | 224132 | Dirc2     | RCC4       |
| chr5  | 1.15E+08 | 1.15E+08 | promoter-1 | promoter-1 | -334    | NM_00100 | 433940 | Fam222a   | -          |
| chr11 | 75980452 | 75980725 | intron (NM | intron (NM | 12544   | NM_02666 | 68299  | Vps53     | 2010002AC  |
| chr17 | 79754852 | 79755100 | promoter-1 | promoter-1 | -545    | NM_02651 | 260409 | Cdc42ep3  | 3200001F0  |
| chr6  | 1.21E+08 | 1.21E+08 | intron (NM | CpG        | 140     | NM_15351 | 94044  | Bcl2l13   | BCL-RAMB0  |
| chr11 | 79902777 | 79903225 | promoter-1 | promoter-1 | 99      | NM_00102 | 237877 | Atad5     | C130052G0  |
| chr16 | 17209977 | 17210125 | exon (NM_  | exon (NM_  | 1823    | NM_00103 | 239731 | Rimbp3    | Gm1759 G   |
| chr1  | 26653527 | 26653800 | Intergenic | Intergenic | 90642   | NM_00103 | 210940 | 4931408C2 | -          |
| chr13 | 16908702 | 16908875 | Intergenic | Intergenic | 802480  | NM_00838 | 16323  | Inhba     | -          |
| chr4  | 1.36E+08 | 1.36E+08 | intron (NM | intron (NM | 9306    | NM_00127 | 74326  | Hnrnp     | 2610003J0  |

|       |          |          |            |            |         |           |        |            |            |
|-------|----------|----------|------------|------------|---------|-----------|--------|------------|------------|
| chr5  | 77524102 | 77524175 | 5' UTR (NM | 5' UTR (NM | 154     | NM_00115  | 74318  | Hopx       | 1110018K1  |
| chr5  | 20637677 | 20638050 | Intergenic | MIRm SINI  | -54222  | NM_17543  | 212167 | Gsap       | A530088I0  |
| chr1  | 55085727 | 55085825 | Intergenic | Intergenic | -1454   | NM_03117  | 81898  | Sf3b1      | 155kDa 28  |
| chr3  | 1.22E+08 | 1.22E+08 | Intergenic | MT2A LTR   | -15730  | NM_00899  | 19299  | Abcd3      | AI313901 , |
| chr16 | 30969827 | 30969975 | intron (NM | intron (NM | 111617  | NM_19862  | 268880 | Xxylt1     | AI480653   |
| chr13 | 23852202 | 23852300 | TTS (NM_1  | TTS (NM_1  | 867     | NM_17819  | 326619 | Hist1h4a   | -          |
| chr3  | 1.33E+08 | 1.33E+08 | promoter-1 | promoter-1 | 178     | NM_02623  | 67553  | Gstcd      | 4933434L1  |
| chr7  | 1.29E+08 | 1.29E+08 | Intergenic | Intergenic | -32251  | NM_00885  | 18751  | Prkcb      | A130082FC  |
| chr15 | 59205527 | 59205675 | promoter-1 | promoter-1 | 106     | NM_15354  | 223593 | E430025E2  | AL022848   |
| chr12 | 1.13E+08 | 1.13E+08 | Intergenic | Intergenic | -13111  | NM_17804  | 217869 | Eif5       | 2810011H2  |
| chr17 | 73456702 | 73456800 | promoter-1 | promoter-1 | -574    | NM_00117  | 225010 | Lclat1     | AI181996 , |
| chr9  | 64644027 | 64644300 | Intergenic | Intergenic | -14655  | NM_00116  | 102442 | Dennd4a    | AI115600 , |
| chr10 | 66998202 | 66998475 | Intergenic | CpG        | -2279   | NM_01011  | 13654  | Egr2       | Egr-2 Krox |
| chr11 | 1.01E+08 | 1.01E+08 | promoter-1 | promoter-1 | -363    | NM_02930  | 75482  | Hspb9      | 1700007H2  |
| chr16 | 32177752 | 32177825 | Intergenic | Intergenic | -2098   | NM_00103  | 328660 | Bex6       | B020003O0  |
| chr9  | 25293977 | 25294075 | intron (NM | intron (NM | 4844    | NM_02618  | 67484  | Eepd1      | 2310005PC  |
| chr11 | 1.16E+08 | 1.16E+08 | promoter-1 | promoter-1 | -268    | NM_02710  | 69535  | Ten1       | 2310004N2  |
| chr3  | 60214252 | 60214400 | Intergenic | Intergenic | -62426  | NM_00125  | 56758  | Mbnl1      | Mbnl mKI/  |
| chr1  | 1.27E+08 | 1.27E+08 | Intergenic | Intergenic | 212403  | NM_02373  | 74117  | Actr3      | 1200003AC  |
| chr1  | 88422252 | 88422850 | promoter-1 | promoter-1 | -760    | NM_00897  | 19231  | Ptma       | Thym       |
| chr10 | 12594627 | 12594825 | Intergenic | Intergenic | -13193  | NM_01168  | 22288  | Utrn       | AA589569   |
| chr4  | 1.09E+08 | 1.09E+08 | promoter-1 | promoter-1 | -181    | NM_00798  | 14084  | Faf1       | AA408698   |
| chr2  | 32236652 | 32237175 | intron (NM | intron (NM | 522     | NM_19800  | 73737  | 1110008P1  | C79326     |
| chr8  | 72426652 | 72427100 | promoter-1 | promoter-1 | -419    | NM_02331  | 67184  | Ndufa13    | 2700054G1  |
| chr9  | 65528777 | 65528975 | intron (NM | intron (NM | 4521    | NM_00130  | 18247  | Oaz2       | AZ-2 AZ2 0 |
| chr16 | 32002952 | 32003200 | intron (NM | CpG        | 297     | NM_17710  | 320213 | Senp5      | 6230429P1  |
| chr3  | 10322577 | 10322825 | intron (NM | intron (NM | 8738    | NM_01886  | 55980  | Impa1      | 2610002KC  |
| chr8  | 1.26E+08 | 1.26E+08 | intron (NR | intron (NR | 389     | NR_028260 | 114896 | Afg3l1     | 1700047GC  |
| chr15 | 76199477 | 76199650 | exon (NM   | exon (NM   | 235     | NM_02155  | 59053  | Hgh1       | Brp16 D15  |
| chr5  | 1.4E+08  | 1.4E+08  | exon (NM   | exon (NM   | 130     | NM_17272  | 231821 | Adap1      | 4930431P1  |
| chr7  | 1.06E+08 | 1.06E+08 | Intergenic | Intergenic | -6128   | NM_02638  | 67800  | Dgat2      | 0610010BC  |
| chr4  | 1.3E+08  | 1.3E+08  | intron (NM | intron (NM | 5063    | NM_02644  | 67898  | Pef1       | 2600002E2  |
| chr9  | 42079677 | 42079850 | Intergenic | Intergenic | -7380   | NM_17276  | 235293 | Sc5d       | A830037KC  |
| chr17 | 26013227 | 26013325 | intron (NM | intron (NM | 831     | NM_02668  | 68347  | 0610011F0- |            |
| chr5  | 1.22E+08 | 1.22E+08 | intron (NM | CpG        | 228     | NM_01129  | 19988  | Rpl6       | Taxreb107  |
| chr3  | 1.3E+08  | 1.3E+08  | intron (NM | CpG        | 363     | NM_02657  | 68147  | Gar1       | AA409823   |
| chr9  | 64064427 | 64064675 | intron (NM | intron (NM | -18457  | NM_03360  | 93841  | Uchl4      | -          |
| chr6  | 1.2E+08  | 1.2E+08  | intron (NM | intron (NM | 79228   | NM_01671  | 29862  | Ninj2      | -          |
| chr13 | 23677052 | 23677125 | TTS (NM_0  | TTS (NM_0  | 751     | NM_00129  | 319179 | Hist1h2be  | -          |
| chr2  | 1.03E+08 | 1.03E+08 | intron (NM | intron (NM | 73968   | NM_00107  | 20511  | Slc1a2     | 1700091C1  |
| chr1  | 90598802 | 90598975 | promoter-1 | promoter-1 | -122    | NM_17730  | 320982 | Arl4c      | A630084M   |
| chr18 | 10617852 | 10618125 | intron (NM | CpG        | 194     | NM_00922  | 20641  | Snrpd1     | AA407109   |
| chr15 | 99495427 | 99495600 | Intergenic | Intergenic | -5636   | NM_00959  | 11419  | Asic1      | AI843610 , |
| chr6  | 17355477 | 17355700 | Intergenic | Intergenic | -58369  | NM_00859  | 17295  | Met        | AI838057 I |
| chr13 | 35555152 | 35555425 | Intergenic | Intergenic | -196443 | NM_00988  | 12593  | Cdyl       | AI325931   |
| chr3  | 1.33E+08 | 1.33E+08 | promoter-1 | promoter-1 | -459    | NM_00104  | 214133 | Tet2       | Ayu17-449  |
| chr6  | 1.29E+08 | 1.29E+08 | Intergenic | Intergenic | -8720   | NM_05310  | 93694  | Clec2d     | Clr-b Clrb |

|       |          |          |            |            |        |          |        |         |            |
|-------|----------|----------|------------|------------|--------|----------|--------|---------|------------|
| chr2  | 30093427 | 30093500 | promoter-1 | promoter-1 | 174    | NM_17772 | 241296 | Lrrc8a  | Lrrc8 mKIA |
| chr1  | 97365427 | 97365675 | Intergenic | Intergenic | 155346 | NM_02632 | 67698  | Fam174a | 2310044D2  |
| chr1  | 84314352 | 84314625 | Intergenic | Intergenic | -33268 | NM_00100 | 98496  | Pid1    | 5033414KC  |
| chrX  | 7576102  | 7576200  | Intergenic | Intergenic | 19467  | NM_02722 | 69824  | Glod5   | 2010001H1  |
| chr18 | 21119927 | 21120000 | intron (NM | CpG        | 16837  | NM_02630 | 67664  | Rnf125  | 4930553F0  |
| chr4  | 1.36E+08 | 1.36E+08 | intron (NM | intron (NM | 7142   | NM_17773 | 242705 | E2f2    | 9230110J1  |
| chr14 | 55496252 | 55496400 | promoter-1 | promoter-1 | 49     | NM_00116 | 105651 | Ppp1r3e | A630071A1  |
| chr16 | 33836877 | 33836975 | intron (NM | intron (NM | 7175   | NM_00114 | 16419  | Itgb5   | AA475909   |
| chr5  | 52747077 | 52747250 | Intergenic | L1MB5 LIN  | -7880  | NM_01143 | 20657  | Sod3    | AI314465 I |
| chr2  | 1.54E+08 | 1.54E+08 | 5' UTR (NV | 5' UTR (NV | 124    | NM_00129 | 13555  | E2f1    | E2F-1 mKl  |
| chr8  | 1.08E+08 | 1.08E+08 | exon (NM_  | exon (NM_  | 765    | NM_00127 | 97440  | B3gnt9  | 3-Gn-T9 B: |



| Gene Desc    | Gene Type      |
|--------------|----------------|
| RIKEN cDN.   | protein-coding |
| zinc finger  | protein-coding |
| protein ph   | protein-coding |
| cystatin B   | protein-coding |
| timeless in  | protein-coding |
| jagged 1     | protein-coding |
| ATPase, an   | protein-coding |
| protein tyr  | protein-coding |
| single-strar | protein-coding |
| chromobo     | protein-coding |
| lymphocyt    | protein-coding |
| X-ray radia  | protein-coding |
| succinate d  | protein-coding |
| ribulose-5-  | protein-coding |
| thymus cel   | protein-coding |
| coagulator   | protein-coding |
| RIKEN cDN.   | protein-coding |
| Fas ligand ( | protein-coding |
| solute carri | protein-coding |
| forkhead b   | protein-coding |
| low density  | protein-coding |
| septin 2     | protein-coding |
| PEST prote   | protein-coding |
| myeloblast   | protein-coding |
| protein kin  | protein-coding |
| dual specifi | protein-coding |
| family with  | protein-coding |
| coiled-coil  | protein-coding |
| activin rece | protein-coding |
| BH3 intera   | protein-coding |
| formin-like  | protein-coding |
| deoxythym    | protein-coding |
| serine/thre  | protein-coding |
| zinc finger  | protein-coding |
| solute carri | protein-coding |
| SUMO/sen     | protein-coding |
| DnaJ (Hsp4   | protein-coding |
| Friend leuk  | protein-coding |
| DNA segm     | protein-coding |
| KH domain    | protein-coding |
| NADH dehy    | protein-coding |
| family with  | protein-coding |
| Aly/REF ex   | protein-coding |
| DENN/MAI     | protein-coding |
| polynucleo   | protein-coding |

dpy-19-like protein-coding  
fasciculatic protein-coding  
cathepsin  $\epsilon$  protein-coding  
family with protein-coding  
ribosomal  $\mu$  protein-coding  
CUGBP, Ela protein-coding  
golgi phospho protein-coding  
low density protein-coding  
CAP-GLY  $\delta$  protein-coding  
negative re protein-coding  
RAB23, me protein-coding  
UDP-glucosyl protein-coding  
mitochondrial protein-coding  
arachidonate protein-coding  
glutathione  $\epsilon$  protein-coding  
SPEG complex protein-coding  
sterol-C5-d protein-coding  
WEE 1 homolog protein-coding  
F-box and  $\mu$  protein-coding  
nucleoporin protein-coding  
tyrosine 3- $\mu$  protein-coding  
mitochondrial protein-coding  
spastin protein-coding  
sorting nexin protein-coding  
DMRT-like protein-coding  
Rho guanine protein-coding  
tyrosine 3- $\mu$  protein-coding  
tubulin,  $\alpha$  protein-coding  
DNA segment protein-coding  
nucleolar protein-coding  
calyculin  $\beta$  protein-coding  
TNF receptor protein-coding  
dicarbonyl protein-coding  
heterogeneous protein-coding  
myotrophin protein-coding  
GC-rich protein-coding  
DEP domain protein-coding  
solute carrier protein-coding  
solute carrier protein-coding  
casein kinase protein-coding  
programmed protein-coding  
insulin induced protein-coding  
tubby like  $\mu$  protein-coding  
COP9 (conserved protein-coding  
3-hydroxy protein-coding  
tyrosine kinase protein-coding  
ring finger protein-coding

nucleolar p protein-coding  
RIKEN cDN. protein-coding  
RIO kinase protein-coding  
zona pelluc protein-coding  
heparan su protein-coding  
tigger tran: protein-coding  
ST8 alpha-I protein-coding  
frizzled hor protein-coding  
tRNA selen protein-coding  
free fatty a protein-coding  
proteasom protein-coding  
transforme protein-coding  
biliverdin r: protein-coding  
zinc finger protein-coding  
RIKEN cDN. protein-coding  
solute carri protein-coding  
ring finger protein-coding  
family with protein-coding  
mediator c protein-coding  
prothymos protein-coding  
ATPase typ protein-coding  
ribosomal j protein-coding  
progesterin a protein-coding  
myotubula protein-coding  
tec protein protein-coding  
aurora kinæ protein-coding  
protease, s protein-coding  
deoxyuridii protein-coding  
tumor sup: protein-coding  
zinc finger protein-coding  
EF-hand ca protein-coding  
solute carri protein-coding  
TBC1 domæ protein-coding  
immunogl: protein-coding  
methyl-Cp( protein-coding  
RAB6A, me protein-coding  
BCL2-like 2 protein-coding  
low density protein-coding  
phosphatic protein-coding  
ELOVL fam protein-coding  
chemokine protein-coding  
proteasom protein-coding  
inositol 1,4 protein-coding  
signal tran: protein-coding  
synaptotag protein-coding  
cAMP resp: protein-coding  
cathepsin C protein-coding

interleukin protein-coding  
regulator o protein-coding  
plexin A4 protein-coding  
tubulin, be protein-coding  
ADP-ribosy protein-coding  
aldo-keto r protein-coding  
biorientati protein-coding  
RAN GTPas protein-coding  
nuclear fac protein-coding  
actin relate protein-coding  
ABO blood protein-coding  
antizyme ir protein-coding  
ribosomal j protein-coding  
protein ser protein-coding  
regulator o protein-coding  
epilepsy, pi protein-coding  
ceramide s protein-coding  
annexin A1 protein-coding  
Rho guanin protein-coding  
guanine nu protein-coding  
MYC bindir protein-coding  
mitochond protein-coding  
ATP-bindin protein-coding  
retinaldehy protein-coding  
solute carri protein-coding  
adaptor-re protein-coding  
fibronectin protein-coding  
endothelia protein-coding  
family with protein-coding  
golgi integr protein-coding  
URI1, prefc protein-coding  
RIKEN cDN. protein-coding  
eukaryotic protein-coding  
AT rich inte protein-coding  
clathrin int protein-coding  
ARP3 actin protein-coding  
ADP-ribosy protein-coding  
protein ph protein-coding  
Rho guanin protein-coding  
B cell leuke protein-coding  
transmemk protein-coding  
male-speci protein-coding  
family with protein-coding  
calcium/ca protein-coding  
transducin protein-coding  
contactin a protein-coding  
leucine rich protein-coding

bridging int protein-coding  
proteasom protein-coding  
TBC1 domæ protein-coding  
RIKEN cDN. protein-coding  
centrosom. protein-coding  
ribosomal j protein-coding  
nudix (nucl protein-coding  
HNF1 homi protein-coding  
vav 3 oncoi protein-coding  
torsin A int protein-coding  
pleckstrin l protein-coding  
tRNA splici protein-coding  
PHD finger protein-coding  
formin-like protein-coding  
tripartite r protein-coding  
RRS1 ribosi protein-coding  
TSR2 20S rI protein-coding  
RAP2B, me protein-coding  
phosphata: protein-coding  
heterogenε protein-coding  
toll-like rec protein-coding  
polymerasε protein-coding  
predicted ξ protein-coding  
KAT8 regul protein-coding  
attractin lik protein-coding  
lysine (K)-s protein-coding  
6-phospho: protein-coding  
RNA bindin protein-coding  
circadian a: protein-coding  
Sad1 and U protein-coding  
kelch-like 2 protein-coding  
phosphatic protein-coding  
K(lysine) ac protein-coding  
RIKEN cDN. protein-coding  
NME/NM2 protein-coding  
solute carri protein-coding  
family with protein-coding  
predicted ξ protein-coding  
DNA segmε protein-coding  
zinc finger protein-coding  
oxidative si protein-coding  
myosin VA protein-coding  
signal recoi protein-coding  
solute carri protein-coding  
heat shock protein-coding  
ring finger protein-coding  
heparin-bir protein-coding

lysosomal-; protein-coding  
adiponectin protein-coding  
Cnksr famil protein-coding  
echinoderr protein-coding  
zinc finger protein-coding  
calcium/ca protein-coding  
apoptosis-; protein-coding  
PDGFA ass; protein-coding  
arylsulfata; protein-coding  
ubiquilin 4 protein-coding  
coiled-coil protein-coding  
ets variant protein-coding  
karyopherin protein-coding  
free fatty acid protein-coding  
polymerase; protein-coding  
MOB kinase; protein-coding  
protein tyrosine; protein-coding  
thymoma v; protein-coding  
serine palmitoyl; protein-coding  
mitochondrial protein-coding  
zinc finger protein-coding  
glycoprotein; protein-coding  
ATP-binding protein-coding  
spleen tyrosine; protein-coding  
NIMA (neurospora); protein-coding  
vacuolar protein-coding  
BCL2-like 1 protein-coding  
ligand dependent; protein-coding  
growth arrest; protein-coding  
phosphoserine; protein-coding  
carbonic anhydrase; protein-coding  
meiosis specific; protein-coding  
olfactomedin; protein-coding  
ER membrane; protein-coding  
growth factor; protein-coding  
integrator; protein-coding  
folylpolyglutamate; protein-coding  
ring finger protein-coding  
ornithine decarboxylase; protein-coding  
thymocyte protein-coding  
prostate transmembrane; protein-coding  
uveal autoantigen; protein-coding  
PHD finger protein-coding  
male-specific; protein-coding  
zinc finger protein-coding  
RING1 and protein-coding  
selectin, lysozyme; protein-coding

zinc finger protein-coding  
activating t protein-coding  
versican protein-coding  
ArfGAP wit protein-coding  
polymerasε protein-coding  
FXFD domε protein-coding  
peptidase ( protein-coding  
nuclear rec protein-coding  
vascular en protein-coding  
hypocretin protein-coding  
CD9 antige protein-coding  
high mobili protein-coding  
carnitine dε protein-coding  
X Kell bloo protein-coding  
RING1 and protein-coding  
Ras associa protein-coding  
calpain 10 protein-coding  
septin 8 protein-coding  
tumor necr protein-coding  
INTS3 and | protein-coding  
autophagy protein-coding  
methioninε protein-coding  
Kruppel-lik protein-coding  
5'-3' exorib protein-coding  
chemokine protein-coding  
interleukin protein-coding  
doublecort protein-coding  
sine oculis- protein-coding  
transforme protein-coding  
predicted ξ protein-coding  
histone de; protein-coding  
TBC1 domε protein-coding  
serine/thre protein-coding  
polyhomec protein-coding  
ring finger protein-coding  
ArfGAP wit protein-coding  
predicted ξ protein-coding  
toll-like rec protein-coding  
Abelson he protein-coding  
transportin protein-coding  
DENN/MAI protein-coding  
tumor prot protein-coding  
calcium ch; protein-coding  
transmemk protein-coding  
KH domain protein-coding  
DDHD dom protein-coding  
H2A histon protein-coding

transmembr protein-coding  
glutathione protein-coding  
KDEL (Lys-) protein-coding  
Kruppel-like protein-coding  
lysine (K)-s protein-coding  
cullin assoc protein-coding  
transportin protein-coding  
phosphodi protein-coding  
WD repeat protein-coding  
muscleblin protein-coding  
syntrophin protein-coding  
peroxisom protein-coding  
sorting nex protein-coding  
cerebellar protein-coding  
interleukin protein-coding  
ubiquitin-c protein-coding  
DDHD dom protein-coding  
biotinidase protein-coding  
dynein, axc protein-coding  
akirin 2 protein-coding  
core 1 synt protein-coding  
syntaxin 2 protein-coding  
disabled 2, protein-coding  
nuclear ass protein-coding  
Grb2-bindi protein-coding  
serine (or c) protein-coding  
histone de protein-coding  
CASP8 and protein-coding  
family with protein-coding  
guanine nu protein-coding  
t-complex protein-coding  
ELAV (emb protein-coding  
RAB3C, me protein-coding  
EH-domain protein-coding  
serine/thre protein-coding  
zinc fingers protein-coding  
striatin, cal protein-coding  
charged mi protein-coding  
family with protein-coding  
septin 12 protein-coding  
ST6 (alpha- protein-coding  
C1GALT1-s protein-coding  
c-src tyrosi protein-coding  
kelch dom protein-coding  
neural prec protein-coding  
cleavage ar protein-coding  
solute carri protein-coding



zinc finger protein-coding  
AT rich inte protein-coding  
splicing fac protein-coding  
cysteinyl-tf protein-coding  
protein ph protein-coding  
dipeptidyl protein-coding  
Fanconi an protein-coding  
nuclear rec protein-coding  
BCL2-like 1 protein-coding  
phosphorit protein-coding  
neuregulin protein-coding  
T cell acute protein-coding  
enoyl Coen protein-coding  
COP9 (cons protein-coding  
guanosine protein-coding  
CD47 antig protein-coding  
ankyrin re protein-coding  
solute carri protein-coding  
6-phospho protein-coding  
small nucle protein-coding  
hemolytic ( protein-coding  
ATP-bindin protein-coding  
WD repeat protein-coding  
glutamate protein-coding  
RAS-relate protein-coding  
tryptophan protein-coding  
arginine va protein-coding  
nucleopori protein-coding  
flavin cont protein-coding  
replication protein-coding  
transmemk protein-coding  
thyroid hor protein-coding  
ERO1-like ( protein-coding  
collagen-lik protein-coding  
claudin 17 protein-coding  
peptidogly protein-coding  
recombina protein-coding  
RIKEN cDN. protein-coding  
lysine (K)-s protein-coding  
nuclear fac protein-coding  
karyopheri protein-coding  
serum/gluc protein-coding  
family with protein-coding  
Max intera protein-coding  
a disintegri protein-coding  
myosin reg protein-coding  
tet methyl protein-coding

transmembr protein-coding  
neural prec protein-coding  
pleckstrin l protein-coding  
LYR motif c protein-coding  
NEDD8 acti protein-coding  
prostaglan protein-coding  
sarcoglycar protein-coding  
ankyrin re protein-coding  
processing protein-coding  
tripartite r protein-coding  
regulator o protein-coding  
ring finger protein-coding  
period circ protein-coding  
eukaryotic protein-coding  
heterogen protein-coding  
leucine rich protein-coding  
male-speci protein-coding  
placenta e protein-coding  
nuclear fac protein-coding  
UDP-Gal:b protein-coding  
COBW don protein-coding  
CDC16 cell protein-coding  
coagulator protein-coding  
forkhead b protein-coding  
fibronectin protein-coding  
MORN rep protein-coding  
olfactory r protein-coding  
isocitrate d protein-coding  
torsin fami protein-coding  
CD180 anti protein-coding  
exonucleas protein-coding  
cholinergic protein-coding  
exocyst cor protein-coding  
suppressor protein-coding  
SEC22 vesic protein-coding  
RNA 2',3'-c protein-coding  
D-tyrosyl-tl protein-coding  
family with protein-coding  
ATPase, Na protein-coding  
lipin 1 protein-coding  
phosphorit protein-coding  
homeobox protein-coding  
RAD51 hon protein-coding  
bone morp protein-coding  
glypican 1 protein-coding  
ribosomal j protein-coding  
retinoic aci protein-coding

potassium protein-coding  
RIKEN cDN. protein-coding  
protein phi protein-coding  
growth arr protein-coding  
myosin IE protein-coding  
mannosida protein-coding  
chimerin 2 protein-coding  
chemokine protein-coding  
CDC42 effe protein-coding  
cell divisor protein-coding  
kelch-like 3 protein-coding  
delta-like 2 protein-coding  
ADP-ribosy protein-coding  
stathmin 1 protein-coding  
DDB1 and ( protein-coding  
phosphofru protein-coding  
glutamic p) protein-coding  
pecanex-lik protein-coding  
alanyl-tRN/ protein-coding  
dynamin bi protein-coding  
RIKEN cDN. protein-coding  
ARP1 actin protein-coding  
glutaredox protein-coding  
lymphocyt protein-coding  
suppressor protein-coding  
quinolinate protein-coding  
E74-like fac protein-coding  
progestero protein-coding  
solute carri protein-coding  
lipase, end protein-coding  
tripartite r protein-coding  
adaptor pr protein-coding  
zinc finger protein-coding  
S100 calciu protein-coding  
protease, s protein-coding  
solute carri protein-coding  
ribonuclea: protein-coding  
regulator o protein-coding  
solute carri protein-coding  
purine-nuc protein-coding  
resistin protein-coding  
RAD50 hon protein-coding  
solute carri protein-coding  
solute carri protein-coding  
xanthine di protein-coding  
delta/notcl protein-coding  
lectin, gala protein-coding

SUMO-inte protein-coding  
ADP-ribosy protein-coding  
G patch do protein-coding  
predicted ξ protein-coding  
WD repeat protein-coding  
galactosida protein-coding  
phosphata: protein-coding  
BTAF1 RNA protein-coding  
mitochond protein-coding  
NEDD4 bin: protein-coding  
myelin pro: protein-coding  
ankyrin 3, ε protein-coding  
macrophag protein-coding  
coagulator protein-coding  
transient rε protein-coding  
RAB14, me protein-coding  
SEH1-like (!: protein-coding  
zinc finger protein-coding  
Sp110 nucl protein-coding  
RIKEN cDN. protein-coding  
HORMA do protein-coding  
CCR4-NOT protein-coding  
DNA prima protein-coding  
cadherin 4 protein-coding  
mediator c protein-coding  
serine/argi protein-coding  
olfactory rε protein-coding  
Sp2 transcr protein-coding  
src homolo protein-coding  
crystallin, ξ protein-coding  
heterogenε protein-coding  
craniofacia protein-coding  
reticulon 4 protein-coding  
insulin-like protein-coding  
ERBB receç protein-coding  
bromodom protein-coding  
predicted ξ protein-coding  
polymerasε protein-coding  
glucosamir protein-coding  
SET domair protein-coding  
zinc finger protein-coding  
leucine zip| protein-coding  
coiled-coil | protein-coding  
sorting nex protein-coding  
tudor and l protein-coding  
related RA: protein-coding  
centrosom. protein-coding

Sad1 and U protein-coding  
mitochond protein-coding  
receptor ac protein-coding  
zinc finger protein-coding  
transmemk protein-coding  
TRAF-inter; protein-coding  
male germ protein-coding  
molybdenu protein-coding  
retinol deh protein-coding  
cell divisior protein-coding  
protein inh protein-coding  
suppressor protein-coding  
phosphoryl protein-coding  
DnaJ (Hsp4 protein-coding  
ring finger protein-coding  
RIKEN cDN. protein-coding  
RNA bindin protein-coding  
protein ph protein-coding  
major facili protein-coding  
protein tyr protein-coding  
zinc finger protein-coding  
camello-lik protein-coding  
SAM doma protein-coding  
tubulin tyr protein-coding  
RIKEN cDN. protein-coding  
PAP associ protein-coding  
solute carri protein-coding  
split hand/ protein-coding  
ATPase, an protein-coding  
solute carri protein-coding  
N-acyletha protein-coding  
zinc finger protein-coding  
coiled-coil protein-coding  
protein kin protein-coding  
calpain 3 protein-coding  
O-6-methy protein-coding  
ets variant protein-coding  
zinc finger protein-coding  
eukaryotic protein-coding  
dual specifi protein-coding  
RIKEN cDN. protein-coding  
zinc finger protein-coding  
Bloom sync protein-coding  
UDP-GlcNA protein-coding  
guanylate l protein-coding  
centromer protein-coding  
Fc receptor protein-coding

DNA segment protein-coding  
MKL (mega protein-coding  
stearoyl-CoA protein-coding  
nuclear export protein-coding  
H2A histone protein-coding  
transformin protein-coding  
solute carrier protein-coding  
cytochrome protein-coding  
serological protein-coding  
family with protein-coding  
syntrophin, protein-coding  
synemin, ir protein-coding  
cathepsin C protein-coding  
glycerol-3-phosphate protein-coding  
predicted protein-coding  
ninjurin 1 protein-coding  
predicted protein-coding  
hemochromin protein-coding  
calmodulin protein-coding  
programmable protein-coding  
RIKEN cDNA protein-coding  
pleckstrin phosphatase protein-coding  
junctional protein-coding  
CCR4 carboxylase protein-coding  
peroxisomal protein-coding  
zinc finger protein-coding  
arginine/sulfhydrylase protein-coding  
neural precursor protein-coding  
YdjC homolog protein-coding  
triple QxxK protein-coding  
olfactomedin protein-coding  
DENN/MAL protein-coding  
ubiquitin-specific protein-coding  
CUE domain protein-coding  
BCL2 binding protein-coding  
SNF8, ESCR protein-coding  
mitochondrial protein-coding  
coiled-coil protein-coding  
ubiquitin-like protein-coding  
steroid 5 alpha reductase protein-coding  
MLX interactor protein-coding  
glutathione transferase protein-coding  
Vac14 homolog protein-coding  
B and T lymphocyte protein-coding  
discs, large protein-coding  
tripartite repeat protein-coding  
microsomal protein-coding

stathmin d protein-coding  
RAN bindin protein-coding  
ubiquitin-f protein-coding  
phosphatic protein-coding  
superoxide protein-coding  
nitrilase fa protein-coding  
glutaryl-Co protein-coding  
UDP-N-ace protein-coding  
family with protein-coding  
transmemt protein-coding  
poly-U binc protein-coding  
TCDD-indu protein-coding  
SAM doma protein-coding  
bleomycin protein-coding  
RNA bindin protein-coding  
Ras and Ra protein-coding  
nucleopori protein-coding  
cDNA sequ protein-coding  
family with protein-coding  
nuclear rec protein-coding  
brain prote protein-coding  
cryptochro protein-coding  
guanine nu protein-coding  
YLP motif c protein-coding  
forkhead b protein-coding  
clavesin 1 protein-coding  
TRAF famil protein-coding  
SCO cytoch protein-coding  
ST8 alpha-I protein-coding  
zinc finger protein-coding  
farnesyl dij protein-coding  
dehydroge protein-coding  
CD93 antig protein-coding  
FBJ osteos protein-coding  
cyclin-depe protein-coding  
polycystic l protein-coding  
acyloxyacy protein-coding  
growth fac protein-coding  
pogo trans protein-coding  
premature protein-coding  
zinc finger protein-coding  
glycerol kir protein-coding  
glycerol kir protein-coding  
proteasom protein-coding  
NADH dehy protein-coding  
sema dom protein-coding  
tumor necr protein-coding

PR domain protein-coding  
DNA cross- protein-coding  
solute carri protein-coding  
zinc finger protein-coding  
autophagy protein-coding  
solute carri protein-coding  
zinc finger protein-coding  
coiled-coil protein-coding  
WD repeat protein-coding  
STIP1 homi protein-coding  
SH3-domai protein-coding  
testis speci protein-coding  
glyceropho protein-coding  
interferon protein-coding  
zinc finger protein-coding  
nucleopori protein-coding  
Fez family ; protein-coding  
cell divisior protein-coding  
bactericida protein-coding  
cysteine-ric protein-coding  
glucoside x protein-coding  
insulin-like protein-coding  
nrde-2 nec protein-coding  
mannoside protein-coding  
NHL repeat protein-coding  
uridine-cyt protein-coding  
transcriptic protein-coding  
cytotoxic g protein-coding  
DCN1, defe protein-coding  
protein ph protein-coding  
CLIP associ protein-coding  
nucleopho: protein-coding  
bromodom protein-coding  
zinc finger protein-coding  
family with protein-coding  
transmemk protein-coding  
thyroid hor protein-coding  
SH2 domai protein-coding  
golgi assoc protein-coding  
serine/thre protein-coding  
phosphatid protein-coding  
zinc finger, protein-coding  
xenotropic protein-coding  
predicted g protein-coding  
biogenesis protein-coding  
SET domair protein-coding  
inositol (m protein-coding



zinc finger protein-coding  
CDKN2A in protein-coding  
polymerase protein-coding  
carbohydrate protein-coding  
ankyrin repeat protein-coding  
cleavage associated protein-coding  
DPH5 human protein-coding  
BCL2-like 1 protein-coding  
kelch-like 5 protein-coding  
RIKEN cDNA protein-coding  
Fc receptor protein-coding  
C-type lectin protein-coding  
cyclin-dependent protein-coding  
phosphatidyl protein-coding  
transducin protein-coding  
NK6 homeobox protein-coding  
serine-rich protein-coding  
DIS3 mitotic protein-coding  
exocyst core protein-coding  
mannosidase protein-coding  
FAT tumor protein-coding  
cytochrome protein-coding  
adiponectin protein-coding  
pinin protein-coding  
reticulum 4 protein-coding  
cyclin-dependent protein-coding  
cytochrome protein-coding  
mitochondrial protein-coding  
zinc finger protein-coding  
leucine zipper protein-coding  
folliculin in protein-coding  
a disintegrin protein-coding  
glucose phosphatase protein-coding  
protein-tyrosine protein-coding  
B cell CLL/lymphoma protein-coding  
syntaxin 12 protein-coding  
kinesin family protein-coding  
phosphogluconate protein-coding  
AT rich integrin protein-coding  
ras homolog protein-coding  
human immunodeficiency protein-coding  
active B cell receptor protein-coding  
zinc finger protein-coding  
enkurin domain protein-coding  
DCP1 decapentaplegic protein-coding  
ribosomal protein-coding  
armadillo repeat protein-coding

phosphatid protein-coding  
wings apar protein-coding  
mitochond protein-coding  
transmemk protein-coding  
serine/thre protein-coding  
ORAI calciu protein-coding  
MOB famil protein-coding  
patatin-like protein-coding  
eukaryotic protein-coding  
ATP-bindin protein-coding  
basic trans protein-coding  
1-acylglyce protein-coding  
RAB33B, m protein-coding  
stanniocalc protein-coding  
toll-like rec protein-coding  
INO80 horr protein-coding  
TGFB-induc protein-coding  
upstream k protein-coding  
LETM1 don protein-coding  
DEAD (Asp- protein-coding  
ATPase, Ca protein-coding  
galactosylc protein-coding  
BMP2 indu protein-coding  
transmemk protein-coding  
RIKEN cDN. protein-coding  
cactin, spli protein-coding  
G1 to S pha protein-coding  
UBA-like dc protein-coding  
renalase, F. protein-coding  
DnaJ (Hsp4 protein-coding  
lysine (K)-s protein-coding  
v-abl Abels protein-coding  
placenta ex protein-coding  
zinc finger protein-coding  
quiescin Qc protein-coding  
microsoma protein-coding  
recombina protein-coding  
hook homc protein-coding  
lysophosph protein-coding  
tyrosine 3- protein-coding  
cytochrom protein-coding  
signal pept protein-coding  
LIM and SH protein-coding  
phospholip protein-coding  
protein arg protein-coding  
ADP-depen protein-coding  
cyclin-depe protein-coding

schlafen 2 protein-coding  
tubulin tyr protein-coding  
ring finger protein-coding  
ankyrin re protein-coding  
MAP/micro protein-coding  
transforma protein-coding  
spermatog protein-coding  
dedicator c protein-coding  
major facili protein-coding  
M-phase s protein-coding  
insulin-like protein-coding  
melanoreg protein-coding  
septin 5 protein-coding  
glycophorin protein-coding  
chromobox protein-coding  
triple funct protein-coding  
zinc finger protein-coding  
intraflagell protein-coding  
hairy/enhancer protein-coding  
trafficking protein-coding  
bromodomain protein-coding  
CDKN2A inhibitor protein-coding  
secretory c protein-coding  
apolipoprotein protein-coding  
collagen, type protein-coding  
multivesicular protein-coding  
nucleoporein protein-coding  
actin related protein-coding  
TM2 domain protein-coding  
zinc finger protein-coding  
suppressor protein-coding  
ceramide synthase protein-coding  
NUF2, NDC protein-coding  
trichorhin protein-coding  
ankyrin re protein-coding  
selenoprotein protein-coding  
zinc finger protein-coding  
Zinc finger protein-coding  
transmembrane protein-coding  
mitogen-activated protein-coding  
cDNA sequence protein-coding  
ATPase, Na<sup>+</sup> protein-coding  
transmembrane protein-coding  
ATPase, H<sup>+</sup> protein-coding  
protein phosphatase protein-coding  
transformer II protein-coding  
protein-L-isoleucine protein-coding

pyroglutar protein-coding  
speckle-tyr protein-coding  
tumor necr protein-coding  
phosphoin protein-coding  
predicted  $\xi$  protein-coding  
perilipin 2 protein-coding  
tRNA splici protein-coding  
acyl-CoA th protein-coding  
vinculin protein-coding  
zinc finger protein-coding  
nuclear rec protein-coding  
tubulin, de protein-coding  
RNA bindin protein-coding  
tyrosine 3-i protein-coding  
transcriptic protein-coding  
heterogen $\epsilon$  protein-coding  
FERM dom protein-coding  
serine hydr protein-coding  
MARCKS-lil protein-coding  
furry homc protein-coding  
chloride int protein-coding  
zinc finger protein-coding  
transportei protein-coding  
src family  $\alpha$  protein-coding  
histone cel protein-coding  
family with protein-coding  
proteasom protein-coding  
transforme protein-coding  
B cell trans protein-coding  
NIMA (nev protein-coding  
splA/ryano protein-coding  
activin rece protein-coding  
regulator o protein-coding  
single strar protein-coding  
ring finger protein-coding  
espin protein-coding  
multiple C2 protein-coding  
adrenergic protein-coding  
signal reco $\rho$  protein-coding  
Rap guanin protein-coding  
spleen tyro protein-coding  
ubiquitin-a protein-coding  
E74-like fac protein-coding  
maestro he protein-coding  
serum resp protein-coding  
SRY (sex de protein-coding  
myotubula protein-coding

ER membrα protein-coding  
signal trans protein-coding  
predicted ε protein-coding  
mesoderm protein-coding  
two pore cl protein-coding  
putative hc protein-coding  
glutamate | protein-coding  
collectin su protein-coding  
ErbB2 inter protein-coding  
adenine ph protein-coding  
coiled-coil | protein-coding  
paired-like protein-coding  
inhibitor of protein-coding  
RAB2A, me protein-coding  
transmemt protein-coding  
STARD3 N- protein-coding  
Hermansky protein-coding  
single strar protein-coding  
PDS5, regu protein-coding  
protein ph protein-coding  
solute carri protein-coding  
schlafen 2 protein-coding  
vacuolar pr protein-coding  
solute carri protein-coding  
putative hc protein-coding  
S-antigen, | protein-coding  
inter-alpha protein-coding  
trafficking | protein-coding  
chromodor protein-coding  
zinc finger protein-coding  
phosphogly protein-coding  
adenosine protein-coding  
oxoglutarα protein-coding  
Eph recept protein-coding  
DEAD (Asp- protein-coding  
cyclin C protein-coding  
klotho beta protein-coding  
RIKEN cDN. protein-coding  
RWD doma protein-coding  
patatin-like protein-coding  
torsin fami protein-coding  
carboxype protein-coding  
serum/gluc protein-coding  
peptidylprc protein-coding  
mitogen-ac protein-coding  
CD33 antig protein-coding  
human imr protein-coding

ribosomal l protein-coding  
cDNA sequ protein-coding  
mitochond protein-coding  
ATP-bindin protein-coding  
potassium protein-coding  
olfactory rε protein-coding  
membrane protein-coding  
progestero protein-coding  
lipase, horr protein-coding  
ubiquitin-c protein-coding  
RIKEN cDN. protein-coding  
protein ph protein-coding  
heat shock protein-coding  
ELK4, mem protein-coding  
2-oxogluta protein-coding  
RAB, meml protein-coding  
degenerati protein-coding  
protein tyr protein-coding  
avian reticu protein-coding  
queuine tR protein-coding  
ATPase, cla protein-coding  
protein ph protein-coding  
ubiquitin-c protein-coding  
calcineurin protein-coding  
glutamate protein-coding  
RAB11 fam protein-coding  
exocyst cor protein-coding  
ring-box 1 protein-coding  
centromer protein-coding  
COP9 (cons protein-coding  
intraflagell. protein-coding  
oocyte secu protein-coding  
RIKEN cDN. protein-coding  
trafficking protein-coding  
signal-regu protein-coding  
proteasom protein-coding  
musculoske protein-coding  
PR domain protein-coding  
protein ph protein-coding  
mitochond protein-coding  
zinc finger protein-coding  
testis exprε protein-coding  
MPV17 mit protein-coding  
cytochrom protein-coding  
signal trans protein-coding  
family with protein-coding  
C2 calcium protein-coding

non-SMC e protein-coding  
poly(A) bin protein-coding  
CDC42 effe protein-coding  
ER degrada protein-coding  
UPF1 regul protein-coding  
polypyrimi protein-coding  
meiotic nu protein-coding  
translocase protein-coding  
DNA segmε protein-coding  
vinculin protein-coding  
TOX high r protein-coding  
homeodon protein-coding  
RB1-induci protein-coding  
microtubul protein-coding  
Rap guanin protein-coding  
neural prec protein-coding  
acylglycero protein-coding  
thioredoxir protein-coding  
asparagine protein-coding  
tetratricop protein-coding  
N(alpha)-a protein-coding  
acyl-Coenz protein-coding  
smoothelin protein-coding  
trinucleotic protein-coding  
caveolin 2 protein-coding  
inhibin bet. protein-coding  
protein ph protein-coding  
serine (or c protein-coding  
zinc finger protein-coding  
phospholip protein-coding  
forkhead b protein-coding  
integrin be protein-coding  
acyl-CoA sy protein-coding  
ankyrin re protein-coding  
sterile alph protein-coding  
von Hippel protein-coding  
actin, alpha protein-coding  
nuclear ant protein-coding  
potassium protein-coding  
protein tyr protein-coding  
coiled-coil protein-coding  
Von Willeb protein-coding  
autophagy, protein-coding  
StAR-relate protein-coding  
influenza v protein-coding  
A kinase (P protein-coding  
peroxisom protein-coding

tribbles ho protein-coding  
family with protein-coding  
isoleucine- protein-coding  
family with protein-coding  
solute carri protein-coding  
ARP3 actin protein-coding  
protein kin protein-coding  
transcriptic protein-coding  
enoyl Coen protein-coding  
meiosis-spi protein-coding  
transmemk protein-coding  
pellino 1 protein-coding  
zinc finger protein-coding  
interleukin protein-coding  
RIKEN cDN. protein-coding  
arrestin do protein-coding  
heterogenε protein-coding  
basic leucir protein-coding  
SET domair protein-coding  
solute carri protein-coding  
potassium protein-coding  
NFKB activ; protein-coding  
ATPase, H+ protein-coding  
cell divisor protein-coding  
RAB3A inte protein-coding  
Kruppel-lik protein-coding  
PC-esteras; protein-coding  
hypoxanthi protein-coding  
autophagy protein-coding  
Rho GTPas; protein-coding  
LFNG O-fuc protein-coding  
TBC1 domε protein-coding  
mitogen-ac protein-coding  
interleukin protein-coding  
RAS p21 pr protein-coding  
UDP-N-ace protein-coding  
RAS proteir protein-coding  
KDM3B lysi protein-coding  
mitochond protein-coding  
5-hydroxyn protein-coding  
testis exprε protein-coding  
selectin, ly; protein-coding  
UDP-Gal:bε protein-coding  
zinc finger protein-coding  
F-box and I protein-coding  
myelin pro; protein-coding  
cyclin-depe protein-coding



adrenomec protein-coding  
zinc finger, protein-coding  
Tctex1 don protein-coding  
phospholip protein-coding  
transmemk protein-coding  
adaptor-re protein-coding  
Janus kinas protein-coding  
sphingomy protein-coding  
INO80 com protein-coding  
KN motif ai protein-coding  
methyltran protein-coding  
nucleotide protein-coding  
elongation protein-coding  
neurotropt protein-coding  
cancer susc protein-coding  
multiple C2 protein-coding  
RNA bindin protein-coding  
CKLF-like N protein-coding  
signal recoj protein-coding  
TAF15 RNA protein-coding  
Ras associa protein-coding  
patatin-like protein-coding  
inverted fo protein-coding  
clathrin, lig protein-coding  
ribosomal j protein-coding  
numb gene protein-coding  
transmemk protein-coding  
family with protein-coding  
transmemk protein-coding  
nucleic acic protein-coding  
RIKEN cDN. protein-coding  
Cobl-like 1 protein-coding  
cyclin-depe protein-coding  
glucocortic protein-coding  
WD repeat protein-coding  
transmemk protein-coding  
solute carri protein-coding  
lon peptidæ protein-coding  
DnaJ (Hsp4 protein-coding  
smg-9 hom protein-coding  
Rho GTPasj protein-coding  
RIKEN cDN. protein-coding  
calcium bir protein-coding  
ATPase, Ca protein-coding  
ribosomal j protein-coding  
nuclear fac protein-coding  
nephroblas protein-coding

suppressor protein-coding  
tectonin be protein-coding  
ficolin B protein-coding  
protein arg protein-coding  
protein ph protein-coding  
transmemk protein-coding  
AF4/FMR2 protein-coding  
protease-a protein-coding  
DnaJ (Hsp4 protein-coding  
clathrin int protein-coding  
kinesin farr protein-coding  
chemokine protein-coding  
interleukin protein-coding  
superkiller protein-coding  
vomeronas protein-coding  
signal sequ protein-coding  
forkhead b protein-coding  
hematolog protein-coding  
valyl-tRNA protein-coding  
fructose bi: protein-coding  
retinoic aci protein-coding  
nuclear rec protein-coding  
short chain protein-coding  
poly(A) bin protein-coding  
mannoside protein-coding  
guanylate t protein-coding  
cell divisor protein-coding  
protein ph protein-coding  
histone de: protein-coding  
zinc finger protein-coding  
B cell CLL/l: protein-coding  
neuromedi protein-coding  
kelch-like 1 protein-coding  
synaptoph protein-coding  
paired lg-lil protein-coding  
RAB intera protein-coding  
neuropilin protein-coding  
transcriptic protein-coding  
tropomyos protein-coding  
mex3 homi protein-coding  
proviral int protein-coding  
serine/thre protein-coding  
poly (ADP-i protein-coding  
abhydrolas protein-coding  
oxysterol b protein-coding  
5' nucleoti protein-coding  
synergic, g protein-coding

sema domꜰ protein-coding  
transmemꜰ protein-coding  
ATPase, an protein-coding  
RIKEN cDN. protein-coding  
RIKEN cDN. protein-coding  
interferon protein-coding  
B cell leuke protein-coding  
cytoplasmꜰ protein-coding  
sex comb c protein-coding  
secretoglol protein-coding  
Rho-associꜰ protein-coding  
PCI domair protein-coding  
calcium/ca protein-coding  
trans-actinꜰ protein-coding  
heterogenꜰ protein-coding  
tubulin pol protein-coding  
WD repeat protein-coding  
guanine nu protein-coding  
Fc receptor protein-coding  
RAS p21 pr protein-coding  
anthrax tox protein-coding  
trans-actinꜰ protein-coding  
Rho, GDP d protein-coding  
MRV integrꜰ protein-coding  
RIKEN cDN. protein-coding  
hexokinase protein-coding  
CAS1 domꜰ protein-coding  
synovial sa protein-coding  
leucine rich protein-coding  
syncytin b protein-coding  
KRI1 homo protein-coding  
ATPase, cla protein-coding  
inhibin bet. protein-coding  
serine paln protein-coding  
TSC22 dom protein-coding  
chaperonir protein-coding  
predicted g protein-coding  
meiosis 1 a protein-coding  
kelch domꜰ protein-coding  
protein kin protein-coding  
ribosomal j protein-coding  
differential protein-coding  
RAD54 like protein-coding  
colony stirr protein-coding  
RIKEN cDN. protein-coding  
trafficking j protein-coding  
phosphodiꜰ protein-coding

Rho GTPase protein-coding  
zinc finger protein-coding  
transformin protein-coding  
bone morph protein-coding  
sorting nexin protein-coding  
SPT2, Supp protein-coding  
Cbp/p300-interacting protein-coding  
reactive oxygen protein-coding  
chemokine protein-coding  
solute carrier protein-coding  
annexin A1 protein-coding  
CD84 antigen protein-coding  
short chain protein-coding  
zinc finger protein-coding  
centromere protein-coding  
Rhesus blood protein-coding  
signal receptor protein-coding  
RIKEN cDNA protein-coding  
down-regulated protein-coding  
transmembrane protein-coding  
IKAROS family protein-coding  
Kruppel-like protein-coding  
acyl-CoA synthetase protein-coding  
LIM domain protein-coding  
immediate protein-coding  
dual specific protein-coding  
coiled-coil protein-coding  
pyridoxal-dependent protein-coding  
transportin protein-coding  
nuclear factor protein-coding  
LIM domain protein-coding  
U2 small nuclear protein-coding  
serine (or cysteine) protein-coding  
high mobility protein-coding  
thiosulfate protein-coding  
natriuretic protein-coding  
serine (or cysteine) protein-coding  
neutrophil protein-coding  
SLX4 interacting protein-coding  
lamin B receptor protein-coding  
pleckstrin phosphatase protein-coding  
nucleobind protein-coding  
mitochondrial protein-coding  
X-linked mental protein-coding  
nucleolar protein-coding  
cytoskeletal protein-coding  
purine rich protein-coding

ceramide s protein-coding  
ankyrin reꝑ protein-coding  
G patch do protein-coding  
homeobox protein-coding  
ubiquitin-c protein-coding  
liver glycog protein-coding  
YTH domai protein-coding  
zinc finger protein-coding  
killer cell le protein-coding  
UDP-N-ace protein-coding  
tRNA-yW s protein-coding  
cystathionꝑ protein-coding  
UHRF1 (ICE protein-coding  
small VCP/ protein-coding  
polymerasꝑ protein-coding  
salt induciꝑ protein-coding  
leucine-ricꝑ protein-coding  
neural prec protein-coding  
ribosome ꝑ protein-coding  
ankyrin reꝑ protein-coding  
ubiquitin-c protein-coding  
Ras associa protein-coding  
coactosin-l protein-coding  
ras responꝑ protein-coding  
leucine ricꝑ protein-coding  
PDLIM1 int protein-coding  
golgi meml protein-coding  
solute carri protein-coding  
nischarin protein-coding  
ribosome ꝑ protein-coding  
histone deꝑ protein-coding  
placental g protein-coding  
BEN domai protein-coding  
collagen, tꝑ protein-coding  
transmemk protein-coding  
WD repeat protein-coding  
proviral int protein-coding  
caspase reꝑ protein-coding  
neuromedi protein-coding  
ATP-bindin protein-coding  
angiotensir protein-coding  
RAS guanyl protein-coding  
mitochond protein-coding  
ubiquitin-fꝑ protein-coding  
G protein-c protein-coding  
placenta-sꝑ protein-coding  
translocase protein-coding

thymus cel protein-coding  
peroxisom protein-coding  
ring finger protein-coding  
survival mc protein-coding  
RNA bindin protein-coding  
Kruppel-lik protein-coding  
lamin B2 protein-coding  
NEDD4 bin protein-coding  
Fc receptor protein-coding  
predicted  $\xi$  protein-coding  
Nipped-B h protein-coding  
cytochrom protein-coding  
isoleucine- protein-coding  
retinol deh protein-coding  
single-strar protein-coding  
Rho GTPas protein-coding  
solute carri protein-coding  
arginyl ami protein-coding  
cDNA sequ protein-coding  
myocyte er protein-coding  
protein kin protein-coding  
enhancer c protein-coding  
centromer protein-coding  
solute carri protein-coding  
zinc finger protein-coding  
zinc finger protein-coding  
THAP dom protein-coding  
integrin be protein-coding  
solute carri protein-coding  
general tra protein-coding  
acidic (leuc protein-coding  
RIKEN cDN. protein-coding  
zinc finger protein-coding  
ELK4, mem protein-coding  
calcium ch protein-coding  
vimentin protein-coding  
cleavage ar protein-coding  
chemokine protein-coding  
1-acylglyce protein-coding  
hexose-6-p protein-coding  
ADP-ribosy protein-coding  
cleavage ar protein-coding  
P450 (cyto protein-coding  
cytochrom protein-coding  
glutamate protein-coding  
dedicator c protein-coding  
MIS18 binc protein-coding

WD repeat protein-coding  
transforma protein-coding  
gasdermin protein-coding  
ST3 beta-g; protein-coding  
RAB24, me protein-coding  
R3H domai protein-coding  
RIKEN cDN. protein-coding  
DNA methy protein-coding  
bolA-like 1 protein-coding  
phospholip protein-coding  
eukaryotic protein-coding  
cut-like hoi protein-coding  
interferon protein-coding  
mortality f; protein-coding  
phosphatic protein-coding  
secretograi protein-coding  
basigin protein-coding  
RIKEN cDN. protein-coding  
NHL repeat protein-coding  
protein ph; protein-coding  
centrosom. protein-coding  
proliferatic protein-coding  
ATPase, Ca protein-coding  
URI1, pref; protein-coding  
death-asso protein-coding  
glucose ph; protein-coding  
CDC14 cell protein-coding  
prolactin f; protein-coding  
exosome c; protein-coding  
ankyrin re; protein-coding  
chemokine protein-coding  
transmemk protein-coding  
ATP syntha protein-coding  
ribosomal j; protein-coding  
zinc finger protein-coding  
insulin-like protein-coding  
ELKS/RAB6 protein-coding  
Tu translat protein-coding  
solute carri protein-coding  
FYVE, RhoC protein-coding  
H2A histon protein-coding  
bradykinin protein-coding  
glycine rec; protein-coding  
eukaryotic protein-coding  
Rho GTPas; protein-coding  
adhesion r; protein-coding  
lysophosph; protein-coding

myosin, ligl protein-coding  
translocase protein-coding  
suppressor protein-coding  
RIKEN cDN. protein-coding  
X-ray repai protein-coding  
ADP-ribosy protein-coding  
solute carri protein-coding  
transmemk protein-coding  
centriolin protein-coding  
RIKEN cDN. protein-coding  
componen protein-coding  
glutathione protein-coding  
transmemk protein-coding  
thioredoxin protein-coding  
RAR-relate protein-coding  
septin 9 protein-coding  
regulatory protein-coding  
thymopoie protein-coding  
seryl-amin protein-coding  
RIKEN cDN. protein-coding  
proline-ser protein-coding  
valyl-tRNA protein-coding  
cytochrom protein-coding  
histone de protein-coding  
DNA-dama protein-coding  
myeloid/ly protein-coding  
choline ph protein-coding  
transducin protein-coding  
FGGY carb protein-coding  
Ral GEF wit protein-coding  
nucleoside protein-coding  
CCAAT/enf protein-coding  
ral guanine protein-coding  
serine (or c protein-coding  
centromer protein-coding  
transmemk protein-coding  
myosin, ligl protein-coding  
outer dens protein-coding  
ribosomal l protein-coding  
acyl-Coenz protein-coding  
CCAAT/enf protein-coding  
cerebral dc protein-coding  
high densit protein-coding  
adaptor pr protein-coding  
KDEL (Lys-/ protein-coding  
FBJ osteos protein-coding  
TAR (HIV) F protein-coding



sterol O-ac protein-coding  
Smg-5 horr protein-coding  
NOP58 ribc protein-coding  
RIKEN cDN. protein-coding  
transmemk protein-coding  
poly (ADP-i protein-coding  
myozenin 1 protein-coding  
Friend leuk protein-coding  
T cell activ; protein-coding  
zinc finger, protein-coding  
G protein-c protein-coding  
adaptor-re protein-coding  
ubiquitin s; protein-coding  
ubiquitin-c protein-coding  
dehydroge protein-coding  
suppressor protein-coding  
inositol pol protein-coding  
ubiquinol-c protein-coding  
DNA-dama protein-coding  
IKAROS fan protein-coding  
hepatocyte protein-coding  
ADAMTS-lil protein-coding  
pseudouric protein-coding  
spondin 1, protein-coding  
tribbles ho protein-coding  
eukaryotic protein-coding  
ras respon; protein-coding  
signal trans protein-coding  
G protein-c protein-coding  
nudix (nucl protein-coding  
ribonucleo; protein-coding  
solute carri protein-coding  
UDP-glucur protein-coding  
DNA-dama protein-coding  
cell divisor protein-coding  
kinase sup; protein-coding  
ribulose-5- protein-coding  
v-maf mus; protein-coding  
eukaryotic protein-coding  
macrophag protein-coding  
mitogen-ac protein-coding  
Aly/REF ex; protein-coding  
zinc finger protein-coding  
ribosomal ; protein-coding  
DEAD (Asp- protein-coding  
ST3 beta-g; protein-coding  
microsphei protein-coding

cathepsin z protein-coding  
forkhead b protein-coding  
thioredoxin protein-coding  
LIM domain protein-coding  
tRNA nucle protein-coding  
zinc finger protein-coding  
zinc finger protein-coding  
zinc finger protein-coding  
multivesicular protein-coding  
replication protein-coding  
DCP1 domain protein-coding  
neuropilin protein-coding  
wingless-type protein-coding  
nuclear receptor protein-coding  
kelch repeat protein-coding  
zinc finger protein-coding  
Sep (O-phospho protein-coding  
predicted protein-coding  
Bruton's tyrosine kinase protein-coding  
transcription factor protein-coding  
vav 1 oncogene protein-coding  
TBC1 domain protein-coding  
snail family protein-coding  
TBC1 domain protein-coding  
forkhead b protein-coding  
cytochrome protein-coding  
prominin 1 protein-coding  
interleukin protein-coding  
cyclin D3 protein-coding  
angiogenin protein-coding  
SMAD family protein-coding  
IMP2 inner protein-coding  
mitochondrial protein-coding  
ribosomal protein-coding  
family with protein-coding  
RIKEN cDNA protein-coding  
sulfotransferase protein-coding  
transmembrane protein-coding  
predicted protein-coding  
potassium protein-coding  
bromodomain protein-coding  
protein phosphatase protein-coding  
phosphatidyl protein-coding  
retinoblastoma protein-coding  
general transcription factor protein-coding  
carbohydrate protein-coding  
destrin protein-coding

serine/thre protein-coding  
discoidin d protein-coding  
Tax1 (hum protein-coding  
ribosomal l protein-coding  
nuclear fac protein-coding  
aconitase 1 protein-coding  
protein ph protein-coding  
STT3, subu protein-coding  
family with protein-coding  
torsin A int protein-coding  
testis speci protein-coding  
ATPase, cla protein-coding  
kinesin far protein-coding  
DNA-dama protein-coding  
multiple C2 protein-coding  
sperm tail l protein-coding  
interleukin protein-coding  
interferon protein-coding  
chromodor protein-coding  
basic leucir protein-coding  
HMG box d protein-coding  
predicted g protein-coding  
resistance i protein-coding  
heat shock protein-coding  
interferon protein-coding  
SWI5 depe protein-coding  
protein ph protein-coding  
integrin-lin protein-coding  
RIKEN cDN. protein-coding  
Rho guanin protein-coding  
diacylglyce protein-coding  
zinc finger, protein-coding  
congenital protein-coding  
TBC1 domε protein-coding  
CCR4 carbc protein-coding  
transmemk protein-coding  
ubiquinol-c protein-coding  
zinc finger protein-coding  
ATP/GTP bi protein-coding  
solute carri protein-coding  
cell divisior protein-coding  
RING1 and protein-coding  
biotinidase protein-coding  
ankyrin re protein-coding  
DEAD (Asp protein-coding  
ArfGAP wit protein-coding  
nucleolar p protein-coding

family with protein-coding  
transglutar protein-coding  
cell divisor protein-coding  
ST3 beta-g; protein-coding  
taste recep protein-coding  
pumilio RN protein-coding  
nuclear rec protein-coding  
mitochond protein-coding  
glucosamir protein-coding  
tumor-assc protein-coding  
peroxisom; protein-coding  
ankyrin re; protein-coding  
BEN domai protein-coding  
centrosom. protein-coding  
uridine mo protein-coding  
CD1d1 anti protein-coding  
aldehyde d protein-coding  
SEC22 vesic protein-coding  
coiled-coil | protein-coding  
cathelicidir protein-coding  
RALY RNA l protein-coding  
teneurin tr protein-coding  
centrosom. protein-coding  
ribosomal | protein-coding  
activating t protein-coding  
scavenger | protein-coding  
tyrosyl-tRN protein-coding  
solute carri protein-coding  
EGF-like re protein-coding  
leukotriene; protein-coding  
ribosomal | protein-coding  
CD3 antige protein-coding  
H2A histon protein-coding  
mannosida protein-coding  
heterogen; protein-coding  
ajuba LIM ¶ protein-coding  
polymerase; protein-coding  
ring finger | protein-coding  
ataxin 2 | protein-coding  
epithelial n protein-coding  
compleme; protein-coding  
zinc finger | protein-coding  
histone de; protein-coding  
zinc and rir protein-coding  
vaccinia rel protein-coding  
TRM5 tRN/ protein-coding  
ubiquitin s; protein-coding

vomerons protein-coding  
AT rich inte protein-coding  
ubiquitin s1 protein-coding  
muscleblin protein-coding  
PR domain protein-coding  
Kruppel-lik protein-coding  
pantothen; protein-coding  
general tra protein-coding  
CD52 antig protein-coding  
vacuolar pr protein-coding  
late endosc protein-coding  
MAX-like p protein-coding  
protein tyr; protein-coding  
stanniocalc protein-coding  
E2F transcr protein-coding  
DNA prima protein-coding  
aspartyl-tR protein-coding  
triggering r protein-coding  
kinase sup; protein-coding  
Ras associa protein-coding  
transmemk protein-coding  
pleckstrin l protein-coding  
kelch-like 2 protein-coding  
transmemk protein-coding  
YY1 transcr protein-coding  
ubiquitin-li protein-coding  
ephrin B1 protein-coding  
cyclin-depe protein-coding  
platelet-aci protein-coding  
DIS3 mitoti protein-coding  
gypsy retrc protein-coding  
TatD DNase protein-coding  
thioredoxir protein-coding  
chloride ch protein-coding  
transcriptic protein-coding  
AT rich inte protein-coding  
EGF domai protein-coding  
phosphom; protein-coding  
ZPR1 zinc f protein-coding  
serine (or c protein-coding  
tet methylc protein-coding  
zinc finger, protein-coding  
dystrobrev protein-coding  
coproporpl protein-coding  
prune hom protein-coding  
CD47 antig protein-coding  
zinc finger protein-coding

splicing fac protein-coding  
G protein-c protein-coding  
cytochrom protein-coding  
transducin protein-coding  
sorting nex protein-coding  
tumor necr protein-coding  
zinc finger protein-coding  
solute carri protein-coding  
RIKEN cDN. protein-coding  
inter-alpha protein-coding  
RIKEN cDN. protein-coding  
deoxyhyphu protein-coding  
cAMP resp. protein-coding  
CTD (carbo protein-coding  
KH domain protein-coding  
SWI/SNF-r protein-coding  
brain-speci protein-coding  
sorting nex protein-coding  
family with protein-coding  
tetratricop protein-coding  
ribosomal l protein-coding  
Ewing tum protein-coding  
Braf transfr protein-coding  
speckle-tyr protein-coding  
coiled-coil protein-coding  
tribbles ho protein-coding  
activating t protein-coding  
notch 2 protein-coding  
methyltran protein-coding  
Kruppel-lik protein-coding  
zinc finger protein-coding  
sodium ch protein-coding  
eukaryotic protein-coding  
leucine rich protein-coding  
histone clu protein-coding  
PR domain protein-coding  
BTB (POZ) protein-coding  
recombina protein-coding  
ATPase fan protein-coding  
glia matura protein-coding  
MAS-relate protein-coding  
methionine protein-coding  
serine/argi protein-coding  
ATP-bindin protein-coding  
zinc finger protein-coding  
ubiquitin-c protein-coding  
cadherin 7, protein-coding

estrogen rε protein-coding  
epithelial s protein-coding  
RIKEN cDN. protein-coding  
nuclear rec protein-coding  
RIKEN cDN. protein-coding  
kinesin farr protein-coding  
zinc finger protein-coding  
melanoreg protein-coding  
NIMA (nev protein-coding  
mitogen-ac protein-coding  
RNA methy protein-coding  
programm protein-coding  
cell divisor protein-coding  
OTU domai protein-coding  
Mid1 inter; protein-coding  
ring finger protein-coding  
exocyst cor protein-coding  
coiled-coil protein-coding  
cystatin 10 protein-coding  
FMS-like ty protein-coding  
ubiquitin c; protein-coding  
KAT8 regul protein-coding  
nuclear rec protein-coding  
tumor necr protein-coding  
atypical ch protein-coding  
family with protein-coding  
Yip1 domai protein-coding  
large tumo protein-coding  
abhydrolas protein-coding  
sema dom; protein-coding  
2-aminoetf protein-coding  
euchromat protein-coding  
BCL2-like 1 protein-coding  
phosphoin; protein-coding  
wings apar protein-coding  
neutrophil protein-coding  
interleukin protein-coding  
target of E( protein-coding  
CKLF-like N protein-coding  
solute carri protein-coding  
PTK2 prote protein-coding  
hexose-6-p protein-coding  
sex comb c protein-coding  
within bgcr protein-coding  
zinc finger protein-coding  
small integ protein-coding  
ATP/GTP bi protein-coding

timeless in protein-coding  
DEAD (Asp protein-coding  
ubiquitin s protein-coding  
eukaryotic protein-coding  
zinc finger protein-coding  
pyrroline-5 protein-coding  
cDNA sequ protein-coding  
single-strar protein-coding  
oxysterol b protein-coding  
neurofascin protein-coding  
loss of hetero protein-coding  
transcriptic protein-coding  
chemokine protein-coding  
ribosomal l protein-coding  
exportin 6 protein-coding  
heparan su protein-coding  
RIKEN cDN. protein-coding  
regulator o protein-coding  
3-ketodihy protein-coding  
phosphodi protein-coding  
Ras and Ra protein-coding  
Sh3 domain protein-coding  
signal reco protein-coding  
microtubul protein-coding  
HECT domæ protein-coding  
NADH dehy protein-coding  
H3 histone protein-coding  
myocardial protein-coding  
chromodor protein-coding  
proteasom protein-coding  
Rab40C, m protein-coding  
ATPase, H<sup>+</sup> protein-coding  
helicase, ly protein-coding  
transmemk protein-coding  
interleukin protein-coding  
RIKEN cDN. protein-coding  
cytochrom protein-coding  
limb-bud a protein-coding  
prothymos protein-coding  
myeloid dif protein-coding  
lipin 1 protein-coding  
polymerasε protein-coding  
THAP domæ protein-coding  
solute carri protein-coding  
solute carri protein-coding  
CCAAT/enf protein-coding  
H1 histone protein-coding



guanine nu protein-coding  
SYS1 Golgi- protein-coding  
cornichon l protein-coding  
secretory c protein-coding  
lectin, man protein-coding  
basic leucir protein-coding  
nucleopori protein-coding  
fibulin 1 protein-coding  
E2F transcr protein-coding  
CD93 antig protein-coding  
NFU1 iron- protein-coding  
programm protein-coding  
REV1 homc protein-coding  
dehydroge protein-coding  
cleavage ar protein-coding  
ras homolc protein-coding  
hydroxyme protein-coding  
ligand of n protein-coding  
sperm flag protein-coding  
lysophosp protein-coding  
microtubul protein-coding  
solute carri protein-coding  
tubulin folc protein-coding  
ATP syntha protein-coding  
UDP-N-ace protein-coding  
ankyrin re protein-coding  
transferrin protein-coding  
phosphopr protein-coding  
neuroguidi protein-coding  
caspase 8  $\alpha$  protein-coding  
phosphodi protein-coding  
AT rich inte protein-coding  
WD repeat protein-coding  
ankyrin re protein-coding  
zinc finger protein-coding  
proteasom protein-coding  
zinc finger protein-coding  
DEAD (Asp- protein-coding  
phosphatic protein-coding  
synaptotag protein-coding  
microtubul protein-coding  
zyg-11 rela protein-coding  
B cell leuke protein-coding  
suppressio protein-coding  
RAB8A, me protein-coding  
general tra protein-coding  
autocrine r protein-coding

COMM dor protein-coding  
mitochond protein-coding  
transferrin protein-coding  
leukotriene protein-coding  
RNA bindin protein-coding  
cadherin 4 protein-coding  
inhibitor of protein-coding  
glutaminas protein-coding  
ryanodine protein-coding  
ArfGAP wit protein-coding  
NIMA (nev protein-coding  
RAD23b ho protein-coding  
suppressio protein-coding  
ribosomal protein-coding  
adhesion r protein-coding  
zinc finger protein-coding  
microtubul protein-coding  
zinc finger, protein-coding  
zinc finger protein-coding  
jumonji do protein-coding  
transmemk protein-coding  
nudix (nucl protein-coding  
serine hydr protein-coding  
clarin 3 protein-coding  
ATPase, H<sup>+</sup> protein-coding  
dipeptidylc protein-coding  
C-type lect protein-coding  
prothymos protein-coding  
interleukin protein-coding  
RAS p21 pr protein-coding  
eukaryotic protein-coding  
ubiquitin C protein-coding  
N(alpha)-a protein-coding  
RanBP-type protein-coding  
TATA box k protein-coding  
cytokine in protein-coding  
tribbles ho protein-coding  
Prkr intera protein-coding  
acyl-Coenz protein-coding  
synuclein, z protein-coding  
striatin, cal protein-coding  
ring finger protein-coding  
pseudouric protein-coding  
myosin IIIB protein-coding  
Crm, cram protein-coding  
serine prot protein-coding  
cAMP resp protein-coding

minichrom protein-coding  
CCR4-NOT protein-coding  
abhydrolas protein-coding  
MOB kinas protein-coding  
methyltran protein-coding  
zinc finger protein-coding  
FK506 bind protein-coding  
MKL (mega protein-coding  
SHANK-ass protein-coding  
zinc finger protein-coding  
Sad1 and U protein-coding  
sterol O-ac protein-coding  
non-SMC e protein-coding  
cAMP resp protein-coding  
transforma protein-coding  
aminolevul protein-coding  
zinc finger protein-coding  
zinc finger protein-coding  
forkhead b protein-coding  
solute carri protein-coding  
potassium protein-coding  
vacuolar pr protein-coding  
sorting nex protein-coding  
ARP3 actin protein-coding  
T cell, imm protein-coding  
methioninε protein-coding  
hairy and e protein-coding  
RAB28, me protein-coding  
methylthio protein-coding  
nuclear fac protein-coding  
TruB pseud protein-coding  
proteasom protein-coding  
karyopheri protein-coding  
ELOVL fam protein-coding  
histone clu protein-coding  
cytochrom protein-coding  
ADP-ribosy protein-coding  
proteasom protein-coding  
transmemk protein-coding  
protein tyr protein-coding  
argonaute protein-coding  
zinc finger protein-coding  
eukaryotic protein-coding  
mitogen-ac protein-coding  
GH regulat protein-coding  
predicted ξ protein-coding  
predicted ξ protein-coding

gephyrin protein-coding  
SCP2 sterol protein-coding  
ArfGAP wit protein-coding  
POU doma protein-coding  
DENN/MAI protein-coding  
LIM domaii protein-coding  
upstream t protein-coding  
exportin, tf protein-coding  
apolipopro protein-coding  
Wolf-Hirscl protein-coding  
CDC28 proi protein-coding  
Nipped-B h protein-coding  
formin-like protein-coding  
a disintegri protein-coding  
autophagy protein-coding  
post-GPI at protein-coding  
predicted  $\xi$  protein-coding  
predicted  $\xi$  protein-coding  
multiple C2 protein-coding  
dishevellec protein-coding  
eukaryotic protein-coding  
cyclin M2 protein-coding  
hairy and e protein-coding  
FMS-like ty protein-coding  
suppressor protein-coding  
RIKEN cDN. protein-coding  
adaptor-re protein-coding  
ribosomal j protein-coding  
elastin mic protein-coding  
catenin (ca protein-coding  
peroxisom; protein-coding  
transcriptic protein-coding  
thromboxa protein-coding  
proteasom protein-coding  
zinc finger protein-coding  
mitochond protein-coding  
leucine, glu protein-coding  
biogenesis protein-coding  
SMAD fami protein-coding  
nucleopori protein-coding  
sphingosin; protein-coding  
adiponectii protein-coding  
TRAF famil' protein-coding  
mannosyl-(c protein-coding  
microsoma protein-coding  
very low d $\epsilon$  protein-coding  
CUGBP, Ela protein-coding

transient rε protein-coding  
ubiquitin sγ protein-coding  
PHD finger protein-coding  
IWS1 homc protein-coding  
ets variant protein-coding  
tripartite rη protein-coding  
mitochond protein-coding  
UDP-N-ace protein-coding  
integrin be protein-coding  
BMP2 indu protein-coding  
KH-type sp protein-coding  
OTU domai protein-coding  
adrenergic protein-coding  
sulfatase 2 protein-coding  
DTW doma protein-coding  
LIM domaii protein-coding  
nuclear fac protein-coding  
metallothic protein-coding  
castor zinc protein-coding  
glycoprotei protein-coding  
FBJ osteosε protein-coding  
pleckstrin ł protein-coding  
villin 1 protein-coding  
kelch repeε protein-coding  
hexamethy protein-coding  
prickle hon protein-coding  
polymerasε protein-coding  
DIRAS fami protein-coding  
centromerι protein-coding  
sprouty ho protein-coding  
cytochromι protein-coding  
circadian lc protein-coding  
CUGBP, Ela protein-coding  
zinc finger protein-coding  
transmemk protein-coding  
transmemk protein-coding  
NEDD4 binι protein-coding  
olfactory rε protein-coding  
tRNA splici protein-coding  
nicalin hor protein-coding  
sphingomy protein-coding  
RAN bindin protein-coding  
Myb/SANT protein-coding  
zinc finger, protein-coding  
transducin- protein-coding  
carbohydrε protein-coding  
rhotekin 2 protein-coding

SH3-bindin protein-coding  
atypical ch protein-coding  
acid phosph protein-coding  
family with protein-coding  
neurofibro protein-coding  
V-set and t protein-coding  
carnitine p; protein-coding  
zinc finger protein-coding  
neuron der protein-coding  
transmemt protein-coding  
dehydroge protein-coding  
Rho GDP di protein-coding  
proteasom protein-coding  
aspartate-t protein-coding  
X-linked inl protein-coding  
proteasom protein-coding  
galactosylc protein-coding  
retinitis pig protein-coding  
coenzyme i protein-coding  
syntaxin 6 protein-coding  
aminolevul protein-coding  
oxysterol b protein-coding  
cyclin L1 protein-coding  
glutathione protein-coding  
ATP-bindin protein-coding  
zinc finger protein-coding  
PTEN induc protein-coding  
mitofusin 2 protein-coding  
WD repeat protein-coding  
RIKEN cDN. protein-coding  
interleukin protein-coding  
UHRF1 (ICE protein-coding  
lysine rich i protein-coding  
heat shock protein-coding  
zinc finger, protein-coding  
lamin B rec protein-coding  
expressed : protein-coding  
H3 histone protein-coding  
nitric oxide protein-coding  
adhesion n protein-coding  
helt bHLH t protein-coding  
cell adhesi protein-coding  
mitochond protein-coding  
SET and M' protein-coding  
aryl-hydroc protein-coding  
glucan (1,4 protein-coding  
WD repeat protein-coding

solute carri protein-coding  
ankyrin reꝑ protein-coding  
solute carri protein-coding  
SMEK hom protein-coding  
protein phꝑ protein-coding  
TRH-degrai protein-coding  
proteasom protein-coding  
ankyrin reꝑ protein-coding  
interleukin protein-coding  
WW domai protein-coding  
UBA-like dꝑ protein-coding  
glutathioneꝑ protein-coding  
ORAI calciu protein-coding  
bromodom protein-coding  
F-box and I protein-coding  
Ras homolꝑ protein-coding  
myocyte er protein-coding  
dual specifi protein-coding  
RAN bindin protein-coding  
zinc finger, protein-coding  
transforma protein-coding  
phorbol-12 protein-coding  
sorting nex protein-coding  
synaptotag protein-coding  
ras homolꝑ protein-coding  
anaphase ꝑ protein-coding  
translocase protein-coding  
actinin alꝑꝑ protein-coding  
voltage-deꝑ protein-coding  
schwannor protein-coding  
COP9 (conꝑ protein-coding  
dynamin bi protein-coding  
MYC-assoc protein-coding  
dynactin 6 protein-coding  
Ena-vasodi protein-coding  
sin3 associ; protein-coding  
GRAM dorꝑ protein-coding  
SH3-domai protein-coding  
protein phꝑ protein-coding  
mediator c protein-coding  
SEC11 hom protein-coding  
histidine dꝑ protein-coding  
microtubul protein-coding  
docking prꝑ protein-coding  
transmemꝑ protein-coding  
myosin, ligꝑ protein-coding  
RIKEN cDN. protein-coding

TNFAIP3 in protein-coding  
astrotactin protein-coding  
phosphata: protein-coding  
ceramide s protein-coding  
SRY (sex de protein-coding  
SWA-70 pr protein-coding  
heparan su protein-coding  
phosphogly protein-coding  
predicted g protein-coding  
G protein-c protein-coding  
mitochond protein-coding  
transmemk protein-coding  
bridging ini protein-coding  
cytotoxic T protein-coding  
inhibitor of protein-coding  
eukaryotic protein-coding  
mediator c protein-coding  
tripartite r protein-coding  
staufen (R protein-coding  
protein ph protein-coding  
poly (ADP-i protein-coding  
insulin-like protein-coding  
ribosomal j protein-coding  
killer cell le protein-coding  
ubiquitin s protein-coding  
cysteine-se protein-coding  
transmemk protein-coding  
phosphata: protein-coding  
Kruppel-lik protein-coding  
myosin IXb protein-coding  
coagulator protein-coding  
ferredoxin protein-coding  
ring finger protein-coding  
Rho guanin protein-coding  
transmemk protein-coding  
zinc finger protein-coding  
transport a protein-coding  
ubiquitin s protein-coding  
sushi domæ protein-coding  
carbonic ar protein-coding  
ubiquitin-c protein-coding  
Ras associa protein-coding  
tribbles ho protein-coding  
high mobili protein-coding  
myelin pro: protein-coding  
phosphatic protein-coding  
transcriptic protein-coding



transmemk protein-coding  
uridine phc protein-coding  
slingshot h protein-coding  
pyrophospl protein-coding  
RIKEN cDN. protein-coding  
A kinase (P protein-coding  
sorting nex protein-coding  
RIKEN cDN. protein-coding  
WD repeat protein-coding  
ring finger protein-coding  
sirtuin 6 protein-coding  
BCL2/aden protein-coding  
c-src tyrosi protein-coding  
coagulator protein-coding  
G protein-c protein-coding  
T cell acute protein-coding  
NADH dehy protein-coding  
zinc finger protein-coding  
chemokine protein-coding  
ring finger protein-coding  
sperm assc protein-coding  
kelch-like 2 protein-coding  
torsin fami protein-coding  
1-acylglyce protein-coding  
small nucle protein-coding  
ferredoxin protein-coding  
BCL2-assoc protein-coding  
testis-speci protein-coding  
Meckel syn protein-coding  
InaD-like (I protein-coding  
interferon  $\beta$  protein-coding  
RIKEN cDN. protein-coding  
calnexin protein-coding  
glycosyltra protein-coding  
olfactory r $\epsilon$  protein-coding  
trafficking  $\beta$  protein-coding  
family with protein-coding  
gremlin 2 h protein-coding  
death asso protein-coding  
monoglyce protein-coding  
ADAMTS-lil protein-coding  
ATPase, cla protein-coding  
ATP syntha protein-coding  
Rho GTPas $\beta$  protein-coding  
SET domair protein-coding  
E74-like fac protein-coding  
F-box prote protein-coding

inhibitor of protein-coding  
solute carri protein-coding  
spectrin re protein-coding  
sterol-C5-d protein-coding  
RIKEN cDN. protein-coding  
teneurin tr protein-coding  
zinc finger protein-coding  
src-like ada protein-coding  
F-box and I protein-coding  
nucleic acic protein-coding  
ribosomal j protein-coding  
phospholip protein-coding  
dehydroge protein-coding  
phosphata: protein-coding  
RPTOR ind protein-coding  
SUB1 homc protein-coding  
protein phc protein-coding  
MAP kinasc protein-coding  
paired box protein-coding  
RAD51 hon protein-coding  
kinesin farr protein-coding  
L-3-hydrox protein-coding  
motile spei protein-coding  
synovial sa protein-coding  
junction-m protein-coding  
thymosin, I protein-coding  
dynein cytc protein-coding  
ubiquitin-c protein-coding  
heat shock protein-coding  
DNA segmε protein-coding  
breast carc protein-coding  
UPF3 regul protein-coding  
isocitrate d protein-coding  
glutaminyl- protein-coding  
insulin rece protein-coding  
predicted ε protein-coding  
kelch domε protein-coding  
lymphocytε protein-coding  
potassium protein-coding  
ubiquinol-c protein-coding  
solute carri protein-coding  
protein phc protein-coding  
lymphocytε protein-coding  
ring finger protein-coding  
GTPase act protein-coding  
insulin rece protein-coding  
non-cataly protein-coding

cell divisor protein-coding  
acylpeptide protein-coding  
glycoprotein protein-coding  
splicing factor protein-coding  
RIKEN cDNA protein-coding  
ring finger protein-coding  
osteoclast protein-coding  
smoothelin protein-coding  
DEAD (Asp) protein-coding  
lipopolysaccharide protein-coding  
seven in absentia protein-coding  
MARVEL (n) protein-coding  
pannexin 1 protein-coding  
islet cell alpha protein-coding  
zinc finger, protein-coding  
family with protein-coding  
ring finger protein-coding  
NUAK family protein-coding  
signal-inducible protein-coding  
U2 small nuclear protein-coding  
deoxyribonucleic acid protein-coding  
CD9 antigen protein-coding  
A kinase (PK) protein-coding  
phosphatase protein-coding  
PAK1 interactor protein-coding  
transcription factor protein-coding  
ER membrane protein-coding  
transforming protein-coding  
chromodomain protein-coding  
CDK5 regulator protein-coding  
La ribonucleoprotein protein-coding  
zinc finger protein-coding  
MOB kinase protein-coding  
coiled-coil protein-coding  
cysteine core protein-coding  
sphingosin protein-coding  
RIKEN cDNA protein-coding  
cyclin E2 protein-coding  
farnesyltransferase protein-coding  
S100 calcium protein-coding  
cDNA sequence protein-coding  
Yamaguchi protein-coding  
Parkinson protein-coding  
hedgehog protein-coding  
ADP-ribosylating protein-coding  
mitochondrial protein-coding  
RAD17 homolog protein-coding

paired-like protein-coding  
DIP2 disco- protein-coding  
proteasom protein-coding  
DnaJ (Hsp4 protein-coding  
inositol pol protein-coding  
DNA prima protein-coding  
Josephin d protein-coding  
syntrophin, protein-coding  
forkhead b protein-coding  
src homolo protein-coding  
twisted gas protein-coding  
SUZ RNA bi protein-coding  
ski sarcom; protein-coding  
sprouty ho protein-coding  
toll-like rec protein-coding  
WD and tei protein-coding  
malonyl Co protein-coding  
centrosom. protein-coding  
CDC14 cell protein-coding  
RIKEN cDN. protein-coding  
SWI/SNF re protein-coding  
non imprin protein-coding  
Fc receptor protein-coding  
ornithine d protein-coding  
HCLS1 bind protein-coding  
ErbB2 inter protein-coding  
guanylate l protein-coding  
parvin, gan protein-coding  
sarcospan protein-coding  
zinc finger protein-coding  
BCL2-assoc protein-coding  
caspase aci protein-coding  
developme protein-coding  
RAB44, me protein-coding  
arginyl ami protein-coding  
synaptotag protein-coding  
lemur tyro: protein-coding  
RMI2, RecC protein-coding  
glutaredox protein-coding  
pyruvate d protein-coding  
mediator c protein-coding  
Wolf-Hirscl protein-coding  
general tra protein-coding  
eukaryotic protein-coding  
solute carri protein-coding  
Ral GTPase protein-coding  
family with protein-coding

glucosamin protein-coding  
dickkopf hc protein-coding  
forkhead b protein-coding  
ribosomal j protein-coding  
mesoderm protein-coding  
solute carri protein-coding  
cytochromi protein-coding  
proteasom protein-coding  
cytosolic th protein-coding  
neuron nav protein-coding  
phosphodi protein-coding  
peroxiredo protein-coding  
staphyloco protein-coding  
UPF2 regul protein-coding  
WD repeat protein-coding  
pleckstrin ε protein-coding  
LAS1-like (ξ protein-coding  
5' nucleoti protein-coding  
cell adhesi protein-coding  
zinc finger protein-coding  
translocase protein-coding  
zinc and rir protein-coding  
PRKC, apoξ protein-coding  
signal recoi protein-coding  
signal trans protein-coding  
mitochond protein-coding  
lipoma HM protein-coding  
ral guanine protein-coding  
ARP5 actin protein-coding  
epsin 1 protein-coding  
poly (ADP-i protein-coding  
olfactory rε protein-coding  
paralemmi protein-coding  
integral mε protein-coding  
peroxisomε protein-coding  
glutathioneε protein-coding  
tetratricop protein-coding  
nudix (nucl protein-coding  
Yip1 domai protein-coding  
RIKEN cDN. protein-coding  
3'-phosphc protein-coding  
WD repeat protein-coding  
olfactory rε protein-coding  
lysosomal t protein-coding  
C-type lecti protein-coding  
SPRY doma protein-coding  
ubiquitin-li protein-coding

transcriptic protein-coding  
nuclear rec protein-coding  
aldehyde d protein-coding  
ring finger protein-coding  
glutamine 1 protein-coding  
dual-specif protein-coding  
notch 2 protein-coding  
RIKEN cDN. protein-coding  
N-acetyglu protein-coding  
annexin A7 protein-coding  
FCH and dc protein-coding  
ameloblast protein-coding  
tripartite r protein-coding  
phospholip protein-coding  
HERPUD fa protein-coding  
RNA bindin protein-coding  
NIMA (nev protein-coding  
Rap guanin protein-coding  
zinc finger protein-coding  
diacylglyce protein-coding  
componen protein-coding  
5-hydroxyn protein-coding  
rosbin, rou protein-coding  
protein ph protein-coding  
coiled-coil protein-coding  
family with protein-coding  
zinc finger protein-coding  
leukemia ir protein-coding  
testis expr protein-coding  
fibroblast g protein-coding  
tRNA meth protein-coding  
zinc finger protein-coding  
brain glyco protein-coding  
ethanolam protein-coding  
family with protein-coding  
Kruppel-lik protein-coding  
androgen c protein-coding  
serine pept protein-coding  
leucine rich protein-coding  
v-ral simiar protein-coding  
sperm mot protein-coding  
cholinergic protein-coding  
CDC28 pro protein-coding  
Ras associa protein-coding  
rosbin, rou protein-coding  
lysine (K)-s protein-coding  
nuclear fac protein-coding

potassium protein-coding  
kallikrein r protein-coding  
RIKEN cDN. protein-coding  
2-oxogluta protein-coding  
trinucleotic protein-coding  
protein tyr protein-coding  
zinc finger protein-coding  
jumonji, AT protein-coding  
pre-mRNA protein-coding  
methyltran protein-coding  
sterile alph protein-coding  
diacylglyce protein-coding  
protein tyr protein-coding  
translocase protein-coding  
chondroitin protein-coding  
guanylate c protein-coding  
G protein-c protein-coding  
host cell fa protein-coding  
RIKEN cDN. protein-coding  
LIM domain protein-coding  
peptidyl-tR protein-coding  
f-box prote protein-coding  
nuclear prc protein-coding  
zinc finger protein-coding  
CD53 antig protein-coding  
signal-indu protein-coding  
ribosomal j protein-coding  
ER membr protein-coding  
antizyme ir protein-coding  
cadherin-r protein-coding  
coiled-coil protein-coding  
syntrophin protein-coding  
cold induci protein-coding  
myelin pro protein-coding  
inositol 1,3 protein-coding  
pygopus 1 protein-coding  
KN motif ai protein-coding  
lysine (K)-s protein-coding  
cold shock protein-coding  
cullin 3 protein-coding  
telomeric r protein-coding  
forkhead b protein-coding  
ski sarcom protein-coding  
GINS comp protein-coding  
zinc finger protein-coding  
zinc finger protein-coding  
zinc finger protein-coding

BMP2 indu protein-coding  
period circ; protein-coding  
adenosine protein-coding  
neurexin III protein-coding  
cadherin, E protein-coding  
WD repeat protein-coding  
angiopoieti protein-coding  
SFT2 doma protein-coding  
transmemk protein-coding  
metastasis protein-coding  
interleukin protein-coding  
leucine rich protein-coding  
DNA methy protein-coding  
C1D nuclea protein-coding  
high mobili protein-coding  
limb and n; protein-coding  
zinc finger protein-coding  
XRCC6 binc protein-coding  
La ribonucl protein-coding  
neural prec protein-coding  
RIKEN cDN. protein-coding  
DIP2 disco- protein-coding  
ubiquitin s; protein-coding  
STE20-like protein-coding  
carbonic ar protein-coding  
RIKEN cDN. protein-coding  
myosin, he protein-coding  
GTPase act protein-coding  
expressed ; protein-coding  
FCH domai protein-coding  
lymphocyt; protein-coding  
potassium protein-coding  
upstream t protein-coding  
RAR-relate; protein-coding  
CD9 antige protein-coding  
GTP bindin protein-coding  
tetratricop protein-coding  
RNA bindin protein-coding  
protein kin protein-coding  
TSC22 dom protein-coding  
anthrax to; protein-coding  
retinol binc protein-coding  
exostoses ( protein-coding  
DnaJ (Hsp4 protein-coding  
oxidative s; protein-coding  
zinc finger protein-coding  
ubiquitin s; protein-coding



farnesyltra protein-coding  
zinc finger protein-coding  
protein-L-is protein-coding  
ArfGAP wit protein-coding  
cysteine ric protein-coding  
Kruppel-lik protein-coding  
DEAD (Asp- protein-coding  
phosphodi protein-coding  
microfibrill protein-coding  
Yamaguchi protein-coding  
leukocyte i protein-coding  
phospholip protein-coding  
kelch-like 8 protein-coding  
TraB doma protein-coding  
ATP syntha protein-coding  
polyadenyl protein-coding  
zinc finger protein-coding  
ELK3, mem protein-coding  
vesicle-ass protein-coding  
cyclin-depe protein-coding  
TBC1 domæ protein-coding  
homeobox protein-coding  
TRAF famil protein-coding  
TAF15 RNA protein-coding  
Ras associa protein-coding  
tubulin tyr protein-coding  
membrane protein-coding  
SEC14-like protein-coding  
pyrroline-5 protein-coding  
SNF relatec protein-coding  
selectin, pl protein-coding  
RAB20, me protein-coding  
renalase, F. protein-coding  
dehydroge protein-coding  
UBX domai protein-coding  
phosphodi protein-coding  
phospholip protein-coding  
inhibitor of protein-coding  
opioid grov protein-coding  
interferon protein-coding  
transient r protein-coding  
ribonuclea: protein-coding  
cyclin D3 protein-coding  
ATPase, H+ protein-coding  
peptidylprc protein-coding  
dihydropyr protein-coding  
NIMA (nev protein-coding

cytochrom protein-coding  
CD2 antige protein-coding  
biogenesis protein-coding  
predicted  $\xi$  protein-coding  
arachidona protein-coding  
far upstrea protein-coding  
tripartite  $\eta$  protein-coding  
cyclin-depe protein-coding  
leucine, glu protein-coding  
neutrophil protein-coding  
dual specifi protein-coding  
schlafen 14 protein-coding  
ATPase, Na protein-coding  
Rho GTPas $\iota$  protein-coding  
proteasom protein-coding  
transient  $\rho$  protein-coding  
arsA arseni protein-coding  
secretory c protein-coding  
UDP-Gal:b $\epsilon$  protein-coding  
SprT-like N protein-coding  
raftlin fami protein-coding  
leucine rich protein-coding  
cerebral ca protein-coding  
signal trans protein-coding  
bridging int protein-coding  
RIKEN cDN. protein-coding  
integrin be protein-coding  
BCL6 co-re protein-coding  
solute carri protein-coding  
dehydroge protein-coding  
5'-nucleoti protein-coding  
STEAP fami protein-coding  
GLI pathog protein-coding  
TBC1 dom $\epsilon$  protein-coding  
zinc finger protein-coding  
protein ph protein-coding  
TAF15 RNA protein-coding  
LIM domai protein-coding  
pleckstrin h protein-coding  
methyl-Cp $\zeta$  protein-coding  
coiled-coil protein-coding  
brevican protein-coding  
LYR motif c protein-coding  
peroxisom protein-coding  
N(alpha)-a protein-coding  
family with protein-coding  
Sec24 relat protein-coding

interferon  $\gamma$  protein-coding  
protein tyrosine phosphatase protein-coding  
paraoxonase 1 protein-coding  
TBC1 domain protein-coding  
CTD (carboxyl-terminal domain) protein-coding  
mannosidase protein-coding  
frizzled homolog protein-coding  
protein phosphatase 1 protein-coding  
FK506 binding protein protein-coding  
synaptotagmin protein-coding  
membrane protein-coding  
transmembrane protein-coding  
Janus kinase protein-coding  
calcium/calmodulin-dependent protein-coding  
branched chain amino acid oxidase protein-coding  
spermatid protein-coding  
DIRAS family protein-coding  
transmembrane protein-coding  
low density lipoprotein receptor protein-coding  
caspase activator protein-coding  
WD repeat protein-coding  
guanine nucleotide exchange factor protein-coding  
MICAL-like protein-coding  
deoxynucleoside kinase protein-coding  
chemokine protein-coding  
RAD9 homolog protein-coding  
GTP-binding protein-coding  
ST3 beta-galactosidase protein-coding  
signal transducer protein-coding  
saccharopin protein-coding  
ubiquitin-conjugating protein-coding  
non-SMC core protein-coding  
lymphocyte protein-coding  
coatamer  $\zeta$  protein-coding  
schwannon protein-coding  
dehydrogenase protein-coding  
golgi SNAP protein-coding  
arachidonase protein-coding  
RNA binding protein-coding  
pyroglutamate protein-coding  
adaptor-receptor protein-coding  
tensin 3 protein-coding  
activin receptor protein-coding  
proteasome protein-coding  
SWI/SNF receptor protein-coding  
peroxiredoxin protein-coding  
UTP3, small protein-coding

E74-like fac protein-coding  
formin binc protein-coding  
stearoyl-Cc protein-coding  
cancer susc protein-coding  
family with protein-coding  
homer hon protein-coding  
gamma-glu protein-coding  
mitochond protein-coding  
claudin 1 protein-coding  
ankyrin reꝑ protein-coding  
aspartyl-tR protein-coding  
stefin A3 protein-coding  
Sjogren's sꝑ protein-coding  
tumor necr protein-coding  
chemokine protein-coding  
paired-like protein-coding  
membrane protein-coding  
SMAD fami protein-coding  
ubiquitin p protein-coding  
BCL6 interꝑ protein-coding  
calcium act protein-coding  
ubiquitin-c protein-coding  
leucine rich protein-coding  
argonaute protein-coding  
arachidona protein-coding  
zinc finger protein-coding  
ribosomal ꝑ protein-coding  
ribosomal ꝑ protein-coding  
paired-like protein-coding  
6-pyruvoyl- protein-coding  
bromodom protein-coding  
triosephosꝑ protein-coding  
RCC1 domꝑ protein-coding  
zinc finger protein-coding  
hexosamin protein-coding  
vascular ce protein-coding  
transmemꝑ protein-coding  
branched c protein-coding  
CD47 antig protein-coding  
sperm antiꝑ protein-coding  
death effec protein-coding  
Ras and Ra protein-coding  
zinc finger protein-coding  
proline-ser protein-coding  
myelin proꝑ protein-coding  
phosphoglꝑ protein-coding  
zinc finger protein-coding

general tra protein-coding  
cleft lip anc protein-coding  
acyl-CoA th protein-coding  
transcriptic protein-coding  
nudix (nucl protein-coding  
opioid rece protein-coding  
mitogen-ac protein-coding  
cardiolipin protein-coding  
La ribonucl protein-coding  
protein ph protein-coding  
colony stir protein-coding  
adenylate c protein-coding  
junction ad protein-coding  
SWI/SNF re protein-coding  
tripartite r protein-coding  
dual specifi protein-coding  
progesterin a protein-coding  
leucine rich protein-coding  
sortilin-rel protein-coding  
RIKEN cDN. protein-coding  
ER degrada protein-coding  
myeloid/ly protein-coding  
RIKEN cDN. protein-coding  
suppressor protein-coding  
autophagy protein-coding  
zinc finger protein-coding  
glutaredox protein-coding  
angiopoieti protein-coding  
centrosom protein-coding  
immunogl protein-coding  
activin rece protein-coding  
signal trans protein-coding  
cell divisior protein-coding  
ribulose-5- protein-coding  
MPV17 mit protein-coding  
ribosomal j protein-coding  
zinc finger protein-coding  
predicted g protein-coding  
mitochond protein-coding  
translocase protein-coding  
protein-tyr protein-coding  
protein O- $\xi$  protein-coding  
eukaryotic protein-coding  
growth fac protein-coding  
SFT2 doma protein-coding  
small integ protein-coding  
kelch-like 3 protein-coding

carcinoeml protein-coding  
Yip1 domai protein-coding  
receptor ac protein-coding  
chromodor protein-coding  
papillary re protein-coding  
B cell CLL/1 protein-coding  
frequently protein-coding  
TBC1 domæ protein-coding  
casein kina protein-coding  
negative el protein-coding  
gasdermin protein-coding  
high densit protein-coding  
oxysterol b protein-coding  
myosin, ligl protein-coding  
cyclin-depe protein-coding  
carbamoyl- protein-coding  
mbt domai protein-coding  
acyl-Coenz protein-coding  
UbiA preny protein-coding  
adenosine protein-coding  
peroxisom; protein-coding  
capicua ho protein-coding  
zinc finger, protein-coding  
zinc finger, protein-coding  
E26 avian l; protein-coding  
glycerol-3-| protein-coding  
asparagine protein-coding  
YTH domai protein-coding  
adaptor-re protein-coding  
V-set and t protein-coding  
tRNA meth protein-coding  
mediator c protein-coding  
lin-9 homo protein-coding  
transglutar protein-coding  
LIM domaii protein-coding  
DSN1, MIN protein-coding  
zinc finger protein-coding  
mitochond protein-coding  
zinc finger, protein-coding  
ubiquitin-c protein-coding  
calcitonin r protein-coding  
Rho GTPas; protein-coding  
F-box and l protein-coding  
immediate protein-coding  
centrosom. protein-coding  
RIKEN cDN. protein-coding  
signal-indu protein-coding

Cbp/p300-i protein-coding  
zinc finger protein-coding  
formin bin protein-coding  
antigen ide protein-coding  
immunity-r protein-coding  
CDC42 sma protein-coding  
phospholip protein-coding  
echinoderr protein-coding  
carbohydr protein-coding  
CCAAT/enf protein-coding  
REX1, RNA protein-coding  
multiple C2 protein-coding  
SH2B adap protein-coding  
ras homolc protein-coding  
phosphatic protein-coding  
CASP2 and protein-coding  
prostaglan protein-coding  
annexin A2 protein-coding  
von Willebl protein-coding  
TBC1 dom protein-coding  
exportin, tf protein-coding  
RNA bindin protein-coding  
aspartic pe protein-coding  
stress-indu protein-coding  
TRAF-inter protein-coding  
stonin 2 protein-coding  
transducin protein-coding  
peptidase i protein-coding  
ADP-ribosy protein-coding  
sulfotransf protein-coding  
cell adhesi protein-coding  
transmemk protein-coding  
rearranged protein-coding  
potassium protein-coding  
ubiquitin sj protein-coding  
uromodulir protein-coding  
mitochond protein-coding  
USO1 vesic protein-coding  
1-acylglyce protein-coding  
protein ph protein-coding  
TBC1 dom protein-coding  
mitochond protein-coding  
sushi dom protein-coding  
TSPY-like 3 protein-coding  
FIG4 homo protein-coding  
predicted ξ protein-coding  
cyclin-depe protein-coding

F-box prote protein-coding  
thioredoxin protein-coding  
ankyrin repeat protein-coding  
hydroxylysine protein-coding  
small nuclear protein-coding  
ATPase, Calcium protein-coding  
leucine-rich protein-coding  
pleckstrin homology protein-coding  
hypoxia-inducible protein-coding  
abl-interacting protein-coding  
pyroglutamate protein-coding  
coiled-coil protein-coding  
acetyl-CoA protein-coding  
R-spondin 1 protein-coding  
B cell transmembrane protein-coding  
N-acetylglucosaminidase protein-coding  
GNAS (guanine nucleotide-binding protein) protein-coding  
protein phosphatase protein-coding  
protein phosphatase protein-coding  
RAB37, member protein-coding  
transducin protein-coding  
zinc finger protein-coding  
family with zinc finger protein-coding  
cullin 1 protein-coding  
destrin protein-coding  
sex comb on midline protein-coding  
CD24a anti-adhesion protein-coding  
contactin A protein-coding  
ubiquitin A protein-coding  
genetic suppressor protein-coding  
glutathione protein-coding  
DNA-damage protein-coding  
zinc finger protein-coding  
integrator protein-coding  
tubulin, alpha protein-coding  
glucose-fructose protein-coding  
AT-rich integrin protein-coding  
ubiquitin specific protein-coding  
aspartate-kinase protein-coding  
leucine rich protein-coding  
serine/threonine protein-coding  
microsomal protein-coding  
Rho guanine nucleotide-binding protein-coding  
histone deacetylase protein-coding  
component protein-coding  
F-box and protein-coding  
c-Maf inducible protein-coding



nuclear rec protein-coding  
zinc finger, protein-coding  
macrophag protein-coding  
anaphase- $\gamma$  protein-coding  
SLAIN moti protein-coding  
solute carri protein-coding  
ankyrin re $\gamma$  protein-coding  
IQ motif an protein-coding  
F-box prote $\epsilon$  protein-coding  
ADP-ribosy protein-coding  
tRNA splici protein-coding  
regulatory protein-coding  
lymphocyt $\epsilon$  protein-coding  
family with protein-coding  
transmem $\kappa$  protein-coding  
myosin ID protein-coding  
ectodyspla protein-coding  
deafness, a protein-coding  
unc-119 hc protein-coding  
ras respon $\delta$  protein-coding  
survival mc protein-coding  
legumain protein-coding  
chromodor protein-coding  
ring finger protein-coding  
regulation protein-coding  
dystrophin protein-coding  
interferon protein-coding  
ATP-bindin protein-coding  
E1A bindin $\eta$  protein-coding  
Epstein-Bai protein-coding  
T cell rece $\gamma$  protein-coding  
G protein-c protein-coding  
dehydroge protein-coding  
serine/thre protein-coding  
trans-actin $\eta$  protein-coding  
acyl-coenz $\eta$  protein-coding  
threonine  $\epsilon$  protein-coding  
dehydroge protein-coding  
RIKEN cDN. protein-coding  
thymoma v protein-coding  
nei like 3 (E protein-coding  
family with protein-coding  
SEC23A (S. protein-coding  
phosphorik protein-coding  
F-box and I protein-coding  
transmem $\kappa$  protein-coding  
coiled-coil protein-coding

tyrosinase- protein-coding  
Kruppel-lik protein-coding  
proline-ser protein-coding  
Sfi1 homol protein-coding  
polymerase protein-coding  
eukaryotic protein-coding  
unc-50 hom protein-coding  
syntaxin 2 protein-coding  
X-ray repair protein-coding  
ethanolam protein-coding  
additional : protein-coding  
clavesin 1 protein-coding  
U2 snRNP-; protein-coding  
glutamate- protein-coding  
family with protein-coding  
ribosomal j protein-coding  
solute carrier protein-coding  
cathepsin f protein-coding  
protein phosphatase protein-coding  
cytochrome protein-coding  
centrosome protein-coding  
fibroblast growth factor protein-coding  
thymopoietin protein-coding  
family with protein-coding  
pyruvate dehydrogenase protein-coding  
patched domain protein-coding  
erythrocyte protein-coding  
cell death inducer protein-coding  
IQ motif containing protein-coding  
adenylate cyclase protein-coding  
transcription factor protein-coding  
post-GPI attachment protein-coding  
surfactant protein-coding  
RIKEN cDNA protein-coding  
eukaryotic protein-coding  
xylosyltransferase protein-coding  
LIM domain protein-coding  
t-complex protein-coding  
RIKEN cDNA protein-coding  
cytidine methyltransferase protein-coding  
nucleobindin protein-coding  
ELAV (embryonic lethal abnormal vision) protein-coding  
calcitonin receptor protein-coding  
lymphocyte protein-coding  
coiled-coil protein-coding  
alpha-kinase protein-coding  
transmembrane protein-coding

family with protein-coding  
chondroitin protein-coding  
carbohydrate protein-coding  
diacylglycerol protein-coding  
RIKEN cDNA protein-coding  
hexokinase protein-coding  
matrix metalloproteinase protein-coding  
hypoxia inducible protein-coding  
cytoplasmic protein-coding  
mesencephalic protein-coding  
olfactory receptor protein-coding  
serine (or cysteine) protein-coding  
integrin alpha protein-coding  
heme binding protein-coding  
WAS/WASL protein-coding  
kelch domain protein-coding  
zinc finger protein-coding  
inhibin beta protein-coding  
bromodomain protein-coding  
ataxin 7-like protein-coding  
UDP-Galactose 4-epimerase protein-coding  
LIM domain protein-coding  
protein kinase protein-coding  
death effector protein-coding  
Fc receptor protein-coding  
gasdermin protein-coding  
solute carrier protein-coding  
ArfGAP with protein-coding  
cyclin M3 protein-coding  
GINS component protein-coding  
transmembrane protein-coding  
1-acylglycerol protein-coding  
cordons-bleus protein-coding  
family with protein-coding  
syndecan beta protein-coding  
cytotoxic granule protein-coding  
zinc finger protein-coding  
transmembrane protein-coding  
TBC1 domain protein-coding  
autism susceptibility protein-coding  
neuroblast protein-coding  
surfeit gene protein-coding  
ring finger protein-coding  
PAX interaction protein-coding  
farnesyltransferase protein-coding  
Williams-Beuren syndrome protein-coding  
RAD54 like protein-coding

histocomp; protein-coding  
polymerase; protein-coding  
coiled-coil- protein-coding  
mannosida protein-coding  
aminopept protein-coding  
caspase 8 protein-coding  
trans-actin; protein-coding  
VMA21 vac protein-coding  
taperin protein-coding  
cytochrom; protein-coding  
prolactin r; protein-coding  
prosaposin protein-coding  
PWP1 hom protein-coding  
kelch-like E protein-coding  
gamma-ar protein-coding  
polyribonu protein-coding  
ribosomal j protein-coding  
cyclin l protein-coding  
enhancer c protein-coding  
dynein, axc protein-coding  
deleted in l protein-coding  
trichohyalin protein-coding  
golgi meml protein-coding  
glucan (1,4 protein-coding  
zinc finger, protein-coding  
DENN/MAI protein-coding  
within bgcr protein-coding  
chemokine protein-coding  
striatin, cal protein-coding  
tumor necr protein-coding  
ATP syntha protein-coding  
lysosomal-; protein-coding  
GID comple protein-coding  
neuregulin protein-coding  
RNA bindin protein-coding  
phosphatid protein-coding  
enhancer c protein-coding  
furry homc protein-coding  
mitochond protein-coding  
HtrA serine protein-coding  
protein ph; protein-coding  
kinesin far protein-coding  
predicted g protein-coding  
tubulin tyr; protein-coding  
MAS-relate protein-coding  
N-myristoy protein-coding  
BCL2 modii protein-coding

dynein, axc protein-coding  
PRP19/PSC protein-coding  
retinoblast protein-coding  
primase an protein-coding  
growth arr protein-coding  
carbohydrate protein-coding  
lin-7 homo protein-coding  
integrin alpha protein-coding  
ankyrin repeat protein-coding  
ankyrin repeat protein-coding  
zinc finger protein-coding  
centrosome protein-coding  
ATPase, class protein-coding  
LEM domain protein-coding  
inner membrane protein-coding  
angiotensin protein-coding  
lamin B receptor protein-coding  
signal-inducible protein-coding  
N-6 adenine protein-coding  
RNA binding protein-coding  
endonuclease protein-coding  
expressed in protein-coding  
anaphase spindle protein-coding  
MAX gene protein-coding  
CAS1 domain protein-coding  
Rho-related protein-coding  
calcium channel protein-coding  
family with protein-coding  
pleckstrin domain protein-coding  
transportin protein-coding  
LON peptidase protein-coding  
dihydrolipase protein-coding  
regulatory protein-coding  
PR domain protein-coding  
ankyrin repeat protein-coding  
somatostatin protein-coding  
F-box protein-coding  
heterogeneous protein-coding  
carbohydrate protein-coding  
centrin 3 protein-coding  
cleavage activation protein-coding  
death inducible protein-coding  
ankyrin repeat protein-coding  
FYVE, Rho GTPase protein-coding  
excision repair protein-coding  
actin, beta protein-coding  
brain and retina protein-coding

Kruppel-lik protein-coding  
zinc finger, protein-coding  
homeodon protein-coding  
APC memb protein-coding  
cell cycle a protein-coding  
zinc finger protein-coding  
CCR4-NOT protein-coding  
sema dom protein-coding  
cytochrom protein-coding  
insulin-like protein-coding  
ring finger protein-coding  
forkhead b protein-coding  
fatty acid b protein-coding  
inositol (m protein-coding  
leucine rich protein-coding  
ribonuclea protein-coding  
ribonuclea protein-coding  
peroxisom protein-coding  
ChaC, catio protein-coding  
WW domai protein-coding  
SR-related protein-coding  
myogenin protein-coding  
GTP bindin protein-coding  
leucine rich protein-coding  
cDNA sequ protein-coding  
isocitrate d protein-coding  
potassium protein-coding  
cysteine an protein-coding  
RIKEN cDN. protein-coding  
nyctalopin protein-coding  
solute carri protein-coding  
monocyte 1 protein-coding  
lectin, gala protein-coding  
MAX dimer protein-coding  
RIKEN cDN. protein-coding  
leucine rich protein-coding  
G protein-c protein-coding  
GPN-loop C protein-coding  
ribonuclea protein-coding  
glutamine- protein-coding  
sushi dom protein-coding  
nuclear fac protein-coding  
chromoson protein-coding  
ST3 beta-g protein-coding  
proteasom protein-coding  
pyruvate d protein-coding  
mitochond protein-coding

coagulation protein-coding  
chemokine protein-coding  
tudor domain protein-coding  
kit oncogene protein-coding  
solute carrier protein-coding  
zyxin protein-coding  
cysteine-rich protein-coding  
procollagen protein-coding  
CDC42 small protein-coding  
CWF19-like protein-coding  
leukotriene protein-coding  
vaccinia receptor protein-coding  
pumilio RNA protein-coding  
zinc finger protein-coding  
ankyrin repeat protein-coding  
membrane protein-coding  
ribosomal protein-coding  
Rho GTPase protein-coding  
solute carrier protein-coding  
zinc finger protein-coding  
DNA segment protein-coding  
family with protein-coding  
heat shock protein-coding  
monoglyceride protein-coding  
retinoid X receptor protein-coding  
pyroglutamate protein-coding  
ATPase, class protein-coding  
protein phosphatase protein-coding  
ribose 5-phosphate protein-coding  
GIPC PDZ domain protein-coding  
ubiquitin-conjugating protein-coding  
solute carrier protein-coding  
charged molecule protein-coding  
fucosyltransferase protein-coding  
lysine (K)-specific protein-coding  
heat shock protein-coding  
forkhead box protein-coding  
myosin VIIA protein-coding  
zinc finger protein-coding  
RCSD domain protein-coding  
carboxypeptidase protein-coding  
SDE2 telomerase protein-coding  
transcription protein-coding  
transmembrane protein-coding  
paired-like protein-coding  
dishevelled protein-coding  
high-mobility protein-coding

uridine-cyt protein-coding  
phosphoin protein-coding  
zinc finger protein-coding  
mastermin protein-coding  
protein ph protein-coding  
mitochond protein-coding  
NEDD4 bin protein-coding  
endoplasm protein-coding  
ribosomal p protein-coding  
histocomp protein-coding  
tumor necr protein-coding  
caspase 1 protein-coding  
transmemk protein-coding  
zinc finger protein-coding  
myosin, ligl protein-coding  
purine-rich protein-coding  
glucosamir protein-coding  
metallothic protein-coding  
translocase protein-coding  
C1q and tu protein-coding  
glucosamir protein-coding  
RIKEN cDN. protein-coding  
toll-like rec protein-coding  
crystallin, g protein-coding  
pleckstrin l protein-coding  
plectin protein-coding  
small integ protein-coding  
leucine rich protein-coding  
dual specifi protein-coding  
Smg-6 hor protein-coding  
nuclear ex protein-coding  
glutathione protein-coding  
interferon i protein-coding  
nuclear VC protein-coding  
dynein, axc protein-coding  
nucleic acic protein-coding  
Nedd4 fam protein-coding  
fos-like ant protein-coding  
CWC22 spli protein-coding  
ring finger protein-coding  
sirtuin 1 protein-coding  
killer cell le protein-coding  
Kv channel protein-coding  
parathyroi protein-coding  
spermatog protein-coding  
histone clu protein-coding  
LPS-induce protein-coding



ataxin 2 protein-coding  
sorting nex protein-coding  
S100 calciu protein-coding  
ribosomal | protein-coding  
transcriptic protein-coding  
GrpE-like 1 protein-coding  
CLPTM1-lik protein-coding  
ribosomal | protein-coding  
signal pept protein-coding  
LIM domaii protein-coding  
ribosomal | protein-coding  
Kruppel-lik protein-coding  
F-box prote protein-coding  
nuclear fac protein-coding  
Rho GTPasi protein-coding  
opticin protein-coding  
early growi protein-coding  
protein arg protein-coding  
brain-speci protein-coding  
zinc finger protein-coding  
NLR family, protein-coding  
phosphatic protein-coding  
predicted  $\xi$  protein-coding  
cDNA sequ protein-coding  
transducin protein-coding  
triggering r protein-coding  
RIKEN cDN. protein-coding  
ankyrin re protein-coding  
latrophilin protein-coding  
lysine (K)-s protein-coding  
DNA segm $\epsilon$  protein-coding  
ribonuclea: protein-coding  
cysteine-se protein-coding  
zinc finger protein-coding  
metallothic protein-coding  
family with protein-coding  
sushi dom $\epsilon$  protein-coding  
phosphatic protein-coding  
trafficking | protein-coding  
C-type lecti protein-coding  
SDE2 telon protein-coding  
TM2 doma protein-coding  
intersectin protein-coding  
zinc finger protein-coding  
polymeras $\epsilon$  protein-coding  
DnaJ (Hsp4 protein-coding  
prostaglan protein-coding

cyclin-depe protein-coding  
solute carri protein-coding  
intraflagell. protein-coding  
regulator o protein-coding  
protein ph protein-coding  
lipopolysac protein-coding  
phospholip protein-coding  
myocardial protein-coding  
interferon protein-coding  
fragile X m protein-coding  
zinc finger protein-coding  
F-box and \ protein-coding  
RAD51 hon protein-coding  
phosphoin protein-coding  
thioredoxir protein-coding  
ST3 beta-g protein-coding  
low density protein-coding  
tetraspanir protein-coding  
PC4 and SF protein-coding  
cilia and fla protein-coding  
CCZ1 vacuc protein-coding  
immunogl protein-coding  
coxsackie v protein-coding  
macrophag protein-coding  
ets variant protein-coding  
potassium protein-coding  
enoyl-Coer protein-coding  
nucleopori protein-coding  
microtubul protein-coding  
Morf4 fami protein-coding  
trafficking | protein-coding  
importin 9 protein-coding  
glutathione protein-coding  
serrate RN protein-coding  
transmemk protein-coding  
sphingosin protein-coding  
fission 1 (r protein-coding  
IQ motif an protein-coding  
activin A re protein-coding  
G-protein c protein-coding  
ancient ubi protein-coding  
thrombosp protein-coding  
interferon ; protein-coding  
mitogen-ac protein-coding  
Jun dimeriz protein-coding  
CD44 antig protein-coding  
F-box prote protein-coding

Kv channel protein-coding  
scaffolding protein-coding  
thymopoie protein-coding  
endoplasm protein-coding  
solute carri protein-coding  
maestro he protein-coding  
mago-nash protein-coding  
vesicle trar protein-coding  
immediate protein-coding  
ladybird hc protein-coding  
heat shock protein-coding  
nuclear fra, protein-coding  
iron-sulfur protein-coding  
inositol 1,4 protein-coding  
WD repeat protein-coding  
adenylate I protein-coding  
family with protein-coding  
HAUS augn protein-coding  
chromobox protein-coding  
RIKEN cDN. protein-coding  
ataxin 7-lik protein-coding  
serine/argi protein-coding  
ubiquinol-c protein-coding  
PAP associ; protein-coding  
dynein ligh protein-coding  
potassium protein-coding  
S-adenosyl protein-coding  
protein ph; protein-coding  
F-box and I protein-coding  
DNA-dama protein-coding  
ATPase, cla protein-coding  
C-terminal protein-coding  
UTP6, smal protein-coding  
armadillo r protein-coding  
La ribonucl protein-coding  
ataxin 2 protein-coding  
N(alpha)-a; protein-coding  
neuron der protein-coding  
family with protein-coding  
WD repeat protein-coding  
DDB1 and ( protein-coding  
polo-like ki protein-coding  
Nipped-B h protein-coding  
regulation protein-coding  
phosphofru protein-coding  
RIKEN cDN. protein-coding  
E74-like fac protein-coding

growth arr; protein-coding  
NLR family, protein-coding  
very low dε; protein-coding  
KRR1, smal protein-coding  
transmemk; protein-coding  
aminoadip; protein-coding  
Rho GTPas; protein-coding  
tripartite n; protein-coding  
acrosomal; protein-coding  
predicted ξ; protein-coding  
zinc finger, protein-coding  
heat shock; protein-coding  
netrin G1; protein-coding  
LYR motif c; protein-coding  
glycyl-tRNA; protein-coding  
mitogen-ac; protein-coding  
coiled coil (; protein-coding  
zinc finger; protein-coding  
RNA bindin; protein-coding  
phosphata; protein-coding  
ubiquitin a; protein-coding  
BCL2/aden; protein-coding  
tec; protein-coding  
Rap guanin; protein-coding  
angio-asso; protein-coding  
cytoplasmic; protein-coding  
microsoma; protein-coding  
zinc finger, protein-coding  
tumor necr; protein-coding  
transmemk; protein-coding  
endothelin; protein-coding  
peroxisom; protein-coding  
ski sarcom; protein-coding  
short chain; protein-coding  
akirin 2; protein-coding  
family with; protein-coding  
salt inducit; protein-coding  
dedicator c; protein-coding  
glutathione; protein-coding  
adaptor pr; protein-coding  
ubiquitin-li; protein-coding  
ATP-bindin; protein-coding  
increased s; protein-coding  
RAB8B, me; protein-coding  
zinc finger; protein-coding  
CD244 nat; protein-coding  
solute carri; protein-coding

helicase (D protein-coding  
malignant 7 protein-coding  
cadherin-rε protein-coding  
predicted ξ protein-coding  
phospholip protein-coding  
lysine (K)-s protein-coding  
canopy 3 h protein-coding  
FMS-like ty protein-coding  
ST6 (alpha- protein-coding  
transmemt protein-coding  
A kinase (P protein-coding  
sema domε protein-coding  
zinc finger, protein-coding  
SECIS bindi protein-coding  
kinesin far protein-coding  
Rho GDP di protein-coding  
snail family protein-coding  
5'-nucleoti protein-coding  
deleted in : protein-coding  
solute carri protein-coding  
JAZF zinc fi protein-coding  
solute carri protein-coding  
nucleopori protein-coding  
glycerol-3-γ protein-coding  
ribosomal γ protein-coding  
histone clu protein-coding  
poly (ADP-γ protein-coding  
bromodom protein-coding  
transcriptic protein-coding  
inhibin bet. protein-coding  
forkhead b protein-coding  
farnesyltra protein-coding  
transmemt protein-coding  
avian musc protein-coding  
ATPase, H+ protein-coding  
spastic par: protein-coding  
tetratricop protein-coding  
fos-like ant protein-coding  
SUN domai protein-coding  
leucine, glu protein-coding  
vesicle-assε protein-coding  
phosphodi protein-coding  
serine/argi protein-coding  
family with protein-coding  
regulating : protein-coding  
additional : protein-coding  
calumenin protein-coding

phorbol-12 protein-coding  
dachshund protein-coding  
IQ motif co protein-coding  
cadherin 1: protein-coding  
RIKEN cDN. protein-coding  
eukaryotic protein-coding  
casein kina protein-coding  
colony stim protein-coding  
glutamate protein-coding  
acyl-Coenz protein-coding  
SR-related protein-coding  
voltage-dep protein-coding  
pleckstrin l protein-coding  
calpain 15 protein-coding  
human imr protein-coding  
protein ph protein-coding  
dpy-19-like protein-coding  
transglutar protein-coding  
GC-rich prc protein-coding  
myosin reg protein-coding  
PDS5, regu protein-coding  
Rieske (Fe- protein-coding  
mex3 homi protein-coding  
THAP dom: protein-coding  
cyclin K protein-coding  
ubiquitin C protein-coding  
NIMA (nev protein-coding  
forkhead b protein-coding  
chemokine protein-coding  
serine/thre protein-coding  
solute carri protein-coding  
lymphocyte protein-coding  
period circ: protein-coding  
formin-like protein-coding  
E26 avian l protein-coding  
regulator o protein-coding  
SKI-like protein-coding  
FK506 bind protein-coding  
selenopho: protein-coding  
zinc finger protein-coding  
Src-like-ad: protein-coding  
CDC14 cell protein-coding  
BCDIN3 do protein-coding  
ring finger protein-coding  
ski sarcom: protein-coding  
RAS-like, fa protein-coding  
Mid1 inter: protein-coding

tRNA splici protein-coding  
paraoxona: protein-coding  
retinoblast protein-coding  
cms small r protein-coding  
exonucleas protein-coding  
5'-nucleoti protein-coding  
diphthamir protein-coding  
TRAF famil protein-coding  
Ras and Ra protein-coding  
Fas (TNFRS protein-coding  
periphilin 1 protein-coding  
phosphata: protein-coding  
ubiquitin s protein-coding  
receptor tr protein-coding  
cytochrom protein-coding  
methionine protein-coding  
tumor necr protein-coding  
sprouty ho protein-coding  
RWD doma protein-coding  
family with protein-coding  
Cbp/p300-i protein-coding  
protein tyr protein-coding  
ATP-bindin protein-coding  
bromodom protein-coding  
Myb/SANT protein-coding  
transportin protein-coding  
zinc finger protein-coding  
ras homolc protein-coding  
thymocyte protein-coding  
rhotekin 2 protein-coding  
meiosis-sp protein-coding  
neuraminic protein-coding  
transketol protein-coding  
transcriptic protein-coding  
centrosom protein-coding  
ring finger protein-coding  
zyg-11 rela protein-coding  
polybromo protein-coding  
uridine mo protein-coding  
glyceropho protein-coding  
RWD doma protein-coding  
solute carri protein-coding  
nuclear rec protein-coding  
glutaredox protein-coding  
interferon protein-coding  
zinc finger, protein-coding  
Ssu72 RNA protein-coding

mesoderm protein-coding  
solute carri protein-coding  
ankyrin 3, ε protein-coding  
xanthine d protein-coding  
replication protein-coding  
ArfGAP wit protein-coding  
SUN domai protein-coding  
insulin ind protein-coding  
diacylglyce protein-coding  
histamine r protein-coding  
vacuolar pr protein-coding  
ras homolc protein-coding  
lipase mat protein-coding  
oxysterol b protein-coding  
parathyroi protein-coding  
lysocardiol protein-coding  
RAD50 inte protein-coding  
AT hook co protein-coding  
armadillo r protein-coding  
small ArfG protein-coding  
potassium protein-coding  
formyl pep protein-coding  
RIKEN cDN. protein-coding  
transmemk protein-coding  
coiled-coil protein-coding  
zinc finger protein-coding  
lipocalin 2 protein-coding  
transportin protein-coding  
sphingomy protein-coding  
GLTSCR1-li protein-coding  
solute carri protein-coding  
endoplasm protein-coding  
brain-enric protein-coding  
histidine tr protein-coding  
transmemk protein-coding  
T cell rece protein-coding  
protocadhe protein-coding  
tumor necr protein-coding  
zinc finger protein-coding  
ORM1-like protein-coding  
THAP dom protein-coding  
oxidative si protein-coding  
acyl-CoA th protein-coding  
solute carri protein-coding  
inhibitor of protein-coding  
methionine protein-coding  
distal-less l protein-coding



galanin rec protein-coding  
ribosomal j protein-coding  
EH domain protein-coding  
interleukin protein-coding  
expressed : protein-coding  
RIMS bindi protein-coding  
integrator ( protein-coding  
killer cell le protein-coding  
RIKEN cDN. protein-coding  
proviral int protein-coding  
heat shock protein-coding  
latrophilin protein-coding  
SH2 domai protein-coding  
angiopieti protein-coding  
RAN bindin protein-coding  
prothymos protein-coding  
nitric oxide protein-coding  
solute carri protein-coding  
zinc finger protein-coding  
cell death i protein-coding  
solute carri protein-coding  
RIKEN cDN. protein-coding  
alanine-gly protein-coding  
NMD3 hor protein-coding  
hematopoi protein-coding  
solute carri protein-coding  
clusterin protein-coding  
zinc finger protein-coding  
solute carri protein-coding  
exportin 1, protein-coding  
polymerasε protein-coding  
adaptor-re protein-coding  
solute carri protein-coding  
retinoblast protein-coding  
discs, large protein-coding  
postmeioti protein-coding  
RIKEN cDN. protein-coding  
isocitrate d protein-coding  
G protein-c protein-coding  
glucosidasε protein-coding  
neutrophili protein-coding  
myosin, he protein-coding  
metallo-be protein-coding  
FSD regio protein-coding  
ELL associa protein-coding  
6-phospho: protein-coding  
C-type lecti protein-coding

caveolin 1, protein-coding  
cyclin-depe protein-coding  
RIKEN cDN. protein-coding  
limb-bud a protein-coding  
phosphatid protein-coding  
transporter protein-coding  
IQ motif co protein-coding  
NADH dehy protein-coding  
RNA bindin protein-coding  
C-type lecti protein-coding  
C-type lecti protein-coding  
tectonic fai protein-coding  
thioesteras protein-coding  
leucine rich protein-coding  
pleckstrin l protein-coding  
mediator c protein-coding  
Abelson he protein-coding  
Ly1 antibox protein-coding  
annexin A1 protein-coding  
apoptosis i protein-coding  
excision rej protein-coding  
cytoskeletc protein-coding  
complemei protein-coding  
H2A histon protein-coding  
serine/argi protein-coding  
ArfGAP wit protein-coding  
family with protein-coding  
RIKEN cDN. protein-coding  
syntaxin bi protein-coding  
family with protein-coding  
TSC22 dom protein-coding  
SWI/SNF re protein-coding  
l(3)mbt-like protein-coding  
transducin protein-coding  
tumor necr protein-coding  
adaptor-re protein-coding  
N-deacetyl protein-coding  
RIKEN cDN. protein-coding  
forkhead b protein-coding  
CCR4-NOT protein-coding  
proteasom protein-coding  
SH2B adap protein-coding  
muscleblin protein-coding  
zinc finger protein-coding  
BH3 intera protein-coding  
spectrin rej protein-coding  
abhydrolas protein-coding

sorcin protein-coding  
PAN2 poly/ protein-coding  
N(alpha)-ac protein-coding  
antigenic d protein-coding  
polypyrimi protein-coding  
guanylate c protein-coding  
fucosyltran protein-coding  
BMS1 hom protein-coding  
kinesin farr protein-coding  
Pbx/knotte protein-coding  
receptor-in protein-coding  
src homolo protein-coding  
taste recep protein-coding  
protein ph protein-coding  
zinc finger protein-coding  
RNA bindin protein-coding  
mannoside protein-coding  
histone clu protein-coding  
coiled-coil protein-coding  
ATP/GTP bi protein-coding  
eukaryotic protein-coding  
DEAH (Asp protein-coding  
epithelial n protein-coding  
germ cell-lk protein-coding  
insulin deg protein-coding  
ARP3 actin protein-coding  
myeloblast protein-coding  
chemokine protein-coding  
UDP-N-ace protein-coding  
FYVE, RhoC protein-coding  
zinc finger, protein-coding  
FK506 bind protein-coding  
PHD finger protein-coding  
cAMP resp protein-coding  
eukaryotic protein-coding  
H2.0-like h protein-coding  
proteoglyc protein-coding  
WW domai protein-coding  
RIKEN cDN protein-coding  
solute carri protein-coding  
interleukin protein-coding  
aspartyl-tR protein-coding  
signaling ly protein-coding  
RIKEN cDN protein-coding  
platelet-ac protein-coding  
golgi integr protein-coding  
UDP-Gal:bc protein-coding

sestrin 2 protein-coding  
nuclear res protein-coding  
suppressor protein-coding  
PWP1 hom protein-coding  
RIKEN cDN. protein-coding  
5-hydroxyt protein-coding  
neuroblast protein-coding  
transcriptic protein-coding  
sex comb c protein-coding  
CCAAT/enf protein-coding  
beta-site A protein-coding  
phosphatic protein-coding  
v-rel reticu protein-coding  
adhesion n protein-coding  
protein tyr protein-coding  
KH-type sp protein-coding  
nucleolar p protein-coding  
vitamin K e protein-coding  
cytochrom protein-coding  
histone clu protein-coding  
WW domai protein-coding  
jade family protein-coding  
ecdysonele protein-coding  
guanine nu protein-coding  
nuclear fac protein-coding  
7-dehydroc protein-coding  
A kinase (P protein-coding  
ribosomal j protein-coding  
AAR2 splici protein-coding  
methylster protein-coding  
ring finger protein-coding  
cytoplasmic protein-coding  
tankyrase, protein-coding  
runt relate protein-coding  
furry homc protein-coding  
ankyrin re protein-coding  
kinesin far protein-coding  
calcium rel protein-coding  
diacylglyce protein-coding  
tet methylc protein-coding  
syntaxin 17 protein-coding  
nuclear fac protein-coding  
oxidative si protein-coding  
adenosine protein-coding  
cullin 1 protein-coding  
SKI family t protein-coding  
solute carri protein-coding

predicted g protein-coding  
lactate deh protein-coding  
guanine de protein-coding  
shisa homc protein-coding  
secreted fr protein-coding  
pyridine nu protein-coding  
ribonuclea: protein-coding  
ADP-ribosy protein-coding  
E2F transcr protein-coding  
hairy/enha protein-coding  
myosin IF protein-coding  
tripartite r protein-coding  
cell cycle a: protein-coding  
proline del protein-coding  
FBJ osteos: protein-coding  
solute carri protein-coding  
hexamethy protein-coding  
transmemk protein-coding  
PHD finger protein-coding  
lysine (K)-s protein-coding  
homeobox protein-coding  
engulfmen: protein-coding  
PRP4 pre-n protein-coding  
RIKEN cDN. protein-coding  
poly(A) bin protein-coding  
early growl protein-coding  
deltex 1 ho protein-coding  
inositol 1,4 protein-coding  
dynein, axc protein-coding  
mitochond protein-coding  
kelch-like 2 protein-coding  
kelch-like 2 protein-coding  
solute carri protein-coding  
TSSK6 activ protein-coding  
carbohydr: protein-coding  
CWC27 spli protein-coding  
atonal horr protein-coding  
AF4/FMR2 protein-coding  
nucleolar p protein-coding  
ER membr: protein-coding  
polymeras: protein-coding  
PDZ domai protein-coding  
chromodor protein-coding  
oxidative si protein-coding  
inositol 1,4 protein-coding  
ATPase, Ca protein-coding  
transforma protein-coding

zinc finger protein-coding  
regulator of protein-coding  
adaptor-receptor protein-coding  
ring finger protein-coding  
Fanconi anemia protein-coding  
sorting nexin protein-coding  
envoplakin protein-coding  
family with protein-coding  
Kruppel-like protein-coding  
olfactory receptor protein-coding  
Coenzyme protein-coding  
kinesin family protein-coding  
predicted protein-coding  
splicing factor protein-coding  
glutamate- protein-coding  
sterile alpha protein-coding  
solute carrier protein-coding  
Kruppel-like protein-coding  
chondroad protein-coding  
ankyrin receptor protein-coding  
glypican 1 protein-coding  
kelch-like 3 protein-coding  
SWA-70 protein-coding  
required for protein-coding  
TAF5-like R protein-coding  
FERM, Rho protein-coding  
R3H domain protein-coding  
IZUMO family protein-coding  
carbonic anhydrase protein-coding  
ArfGAP with protein-coding  
BCL2-associated protein-coding  
cytochrome protein-coding  
cut-like homeobox protein-coding  
vomeronasal protein-coding  
regulator of protein-coding  
ATP synthase protein-coding  
mitochondrial protein-coding  
cAMP response protein-coding  
cysteine-rich protein-coding  
polymerase protein-coding  
tubulin, alpha protein-coding  
UBX domain protein-coding  
acyl-CoA synthase protein-coding  
adducin 3 ( protein-coding  
splicing factor protein-coding  
C1q and tu protein-coding  
ankyrin receptor protein-coding

coiled-coil protein-coding  
ATP-binding protein-coding  
leucine-rich protein-coding  
nephronop protein-coding  
solute carrier protein-coding  
molybdenum protein-coding  
RIKEN cDNA protein-coding  
fyn-related protein-coding  
polynucleotide protein-coding  
C-type lectin protein-coding  
Rho GTPase protein-coding  
cathepsin K protein-coding  
acetyl-CoA protein-coding  
microtubule protein-coding  
baculoviral protein-coding  
peptidylprolyl protein-coding  
calmodulin protein-coding  
tribbles homolog protein-coding  
solute carrier protein-coding  
Der1-like domain protein-coding  
transformin protein-coding  
DENN/MAL protein-coding  
versican protein-coding  
signal receptor protein-coding  
Z-DNA binding protein-coding  
opioid growth protein-coding  
zinc finger protein-coding  
pyridoxal (5-phosphate) protein-coding  
ArfGAP with protein-coding  
centrosomal protein-coding  
protein kinase protein-coding  
X-box binding protein-coding  
TMEM9 domain protein-coding  
bone morphogen protein-coding  
cytoplasmic protein-coding  
sorbin and protein-coding  
RELT tumor protein-coding  
cytokine inhibitor protein-coding  
sema domain protein-coding  
cyclin Pas1 protein-coding  
Obg-like A1 protein-coding  
ras homolog protein-coding  
acidic (leucine) protein-coding  
ubiquitin protein-coding  
tripartite repeat protein-coding  
armadillo repeat protein-coding  
ribosomal protein-coding

RIKEN cDN. protein-coding  
ectonucleo protein-coding  
E2F-associ protein-coding  
SPT2, Supp protein-coding  
low density protein-coding  
dual specif protein-coding  
asparagine protein-coding  
myelin basi protein-coding  
laccase (m protein-coding  
proprotein protein-coding  
kinesin farr protein-coding  
SEC16 hom protein-coding  
tyrosyl-DN, protein-coding  
blocked ea protein-coding  
zinc finger protein-coding  
TNF recept protein-coding  
GPALPP mc protein-coding  
vesicle-ass protein-coding  
NUAK fami protein-coding  
isochorism protein-coding  
ribonuclea: protein-coding  
zinc finger, protein-coding  
bromodom protein-coding  
tubulin, al protein-coding  
MAP kinas protein-coding  
lipoma HM protein-coding  
ATP-bindin protein-coding  
RIKEN cDN. protein-coding  
predicted g protein-coding  
coiled-coil protein-coding  
bicaudal D protein-coding  
methyl-Cp protein-coding  
junction ad protein-coding  
neural prec protein-coding  
eukaryotic protein-coding  
polymeras protein-coding  
ADP-ribosy protein-coding  
ORAI calciu protein-coding  
methyltran protein-coding  
RIKEN cDN. protein-coding  
saccharopi protein-coding  
eukaryotic protein-coding  
myelin pro: protein-coding  
biogenesis protein-coding  
cyclin G as: protein-coding  
polymeras protein-coding  
reticulon 4 protein-coding



ring finger protein-coding  
transmemk protein-coding  
NOL1/NOP protein-coding  
RIKEN cDN. protein-coding  
SHQ1 homi protein-coding  
Ewing tumi protein-coding  
collagen, ty protein-coding  
chromodor protein-coding  
inositol 1,4 protein-coding  
threonyl-tF protein-coding  
ubiquitin c; protein-coding  
nuclear fac protein-coding  
regulator o protein-coding  
serine (or c protein-coding  
interleukin protein-coding  
Nipped-B h protein-coding  
splicing reg protein-coding  
proteasom protein-coding  
potassium protein-coding  
hairy and e protein-coding  
zinc finger, protein-coding  
protein ph protein-coding  
Shwachma protein-coding  
CDK5 regul protein-coding  
prosaposin protein-coding  
cell divisor protein-coding  
chymotryp protein-coding  
transmemk protein-coding  
coenzyme i protein-coding  
serine/thre protein-coding  
proteasom protein-coding  
BEN domai protein-coding  
transcriptic protein-coding  
pleckstrin l protein-coding  
mitochond protein-coding  
sarcospan protein-coding  
poly(rC) bir protein-coding  
phosphatic protein-coding  
LON peptid protein-coding  
caspase 3 protein-coding  
secreted pl protein-coding  
pecanex hc protein-coding  
mitogen-ac protein-coding  
colony stir protein-coding  
chondroitir protein-coding  
MACRO do protein-coding  
carbohydrã protein-coding

BCL2/aden protein-coding  
BCL2-like 1 protein-coding  
secretograi protein-coding  
mitogen-ac protein-coding  
CCAAT/enf protein-coding  
ornithine d protein-coding  
WD repeat protein-coding  
COMM dor protein-coding  
membrane protein-coding  
dicer 1, rib protein-coding  
RAS, guany protein-coding  
mastermin protein-coding  
SCO cytoch protein-coding  
PR domain protein-coding  
serine pept protein-coding  
WD repeat protein-coding  
teneurin tr protein-coding  
transmemk protein-coding  
protein tyr protein-coding  
ring finger protein-coding  
family with protein-coding  
Tia1 cytoto protein-coding  
Rho-relate protein-coding  
doublecort protein-coding  
ATP-bindin protein-coding  
neutrophili protein-coding  
spinster ho protein-coding  
clathrin, he protein-coding  
insulin rece protein-coding  
alpha-N-ac protein-coding  
angiomotir protein-coding  
SH3-domai protein-coding  
ribosomal j protein-coding  
TAO kinase protein-coding  
protein ph protein-coding  
ribonuclea: protein-coding  
HOP home protein-coding  
organic sol protein-coding  
regulator o protein-coding  
Ras and Ra protein-coding  
BTB (POZ) ( protein-coding  
nucleolar p protein-coding  
excision rej protein-coding  
immunity-r protein-coding  
amylo-1,6-i protein-coding  
protein ph protein-coding  
ubiquitin-c protein-coding

ubiquitin s<sub>1</sub> protein-coding  
phosphodi protein-coding  
serine (or c protein-coding  
Bcl2-like 1C protein-coding  
GATA zinc 1 protein-coding  
protease, s protein-coding  
membrane protein-coding  
MOB kinas protein-coding  
centromer<sub>1</sub> protein-coding  
calcium/ca protein-coding  
uridine-cyt protein-coding  
uracil DNA protein-coding  
interleukin protein-coding  
scavenger 1 protein-coding  
leucine rich protein-coding  
pleckstrin ε protein-coding  
UDP-Gal:bε protein-coding  
syntaxin 11 protein-coding  
insulin-like protein-coding  
placenta-s<sub>1</sub> protein-coding  
ret finger p protein-coding  
CUB and zc protein-coding  
TRAF3 inte protein-coding  
activating t protein-coding  
apoptosis ε protein-coding  
synaptotag protein-coding  
RAD9 hom<sub>1</sub> protein-coding  
sperm flag<sub>1</sub> protein-coding  
kinesin far<sub>1</sub> protein-coding  
chemokine protein-coding  
tRNA meth protein-coding  
eukaryotic protein-coding  
UDP-Gal:bε protein-coding  
ST8 alpha-I protein-coding  
GDNF-indu protein-coding  
von Willeb<sub>1</sub> protein-coding  
DDB1 and ( protein-coding  
thyroglobu protein-coding  
phosphatic protein-coding  
FIC domain protein-coding  
inositol pol protein-coding  
chloride int protein-coding  
mucin 13, ε protein-coding  
mitochond protein-coding  
chromodor protein-coding  
interleukin protein-coding  
ST3 beta-g<sub>1</sub> protein-coding

sorting nex protein-coding  
cell divisior protein-coding  
vomeronas protein-coding  
ELAV (emb protein-coding  
H3 histone protein-coding  
plasminoge protein-coding  
low density protein-coding  
zinc finger protein-coding  
eukaryotic protein-coding  
predicted  $\xi$  protein-coding  
alpha thala protein-coding  
phospholip protein-coding  
Shc SH2-dc protein-coding  
acyl-Coenz protein-coding  
t-complex protein-coding  
sorting nex protein-coding  
nuclear rec protein-coding  
nardilysin, protein-coding  
olfactory r protein-coding  
transmemt protein-coding  
crystallin, l protein-coding  
cystathion protein-coding  
estrogen-r protein-coding  
leucine rich protein-coding  
Rho GTPas protein-coding  
heme oxyg protein-coding  
lysine (K)-s protein-coding  
valosin con protein-coding  
thrombosp protein-coding  
chloride ch protein-coding  
tetratricop protein-coding  
amyloid be protein-coding  
F-box prote protein-coding  
nuclear fac protein-coding  
endothelin protein-coding  
calmodulin protein-coding  
spastic par protein-coding  
calpain, sm protein-coding  
regulation protein-coding  
AT rich inte protein-coding  
sphingomy protein-coding  
WD repeat protein-coding  
neuron nav protein-coding  
ninein protein-coding  
predicted  $\xi$  protein-coding  
RIKEN cDN. protein-coding  
TGFB-induc protein-coding

ribosomal | protein-coding  
valosin con protein-coding  
casein kina protein-coding  
anoctamin protein-coding  
prenyl (sol) protein-coding  
myeloid ce protein-coding  
TNF recept protein-coding  
N-acetylglu protein-coding  
centromerı protein-coding  
microtubul protein-coding  
zinc finger protein-coding  
glycerol ph protein-coding  
transketolā protein-coding  
TBC1 domā protein-coding  
RAD21 hon protein-coding  
immunity-r protein-coding  
lactate deh protein-coding  
signal-regu protein-coding  
Ras-relatec protein-coding  
H2A histon protein-coding  
regulator o protein-coding  
palladin, cy protein-coding  
exosome cı protein-coding  
TBC1 domā protein-coding  
lipase, endı protein-coding  
G protein-c protein-coding  
suppressor protein-coding  
lysine (K)-s protein-coding  
interferon protein-coding  
haptoglobi protein-coding  
NADH dehy protein-coding  
RAB14, me protein-coding  
solute carri protein-coding  
RIKEN cDN. protein-coding  
calsyntenir protein-coding  
RIKEN cDN. protein-coding  
NOP56 ribc protein-coding  
DEP domai protein-coding  
AT rich inte protein-coding  
BAH domai protein-coding  
RAB5C, me protein-coding  
RIKEN cDN. protein-coding  
caspase 8 protein-coding  
intraflagell. protein-coding  
dihydrolipc protein-coding  
purinergic | protein-coding  
SWI/SNF re protein-coding

F-box and \ protein-coding  
phosphoin protein-coding  
zinc finger protein-coding  
biorientati protein-coding  
RAN bindin protein-coding  
tripeptidyl protein-coding  
ribosomal I protein-coding  
aryl hydroc protein-coding  
gamma-sec protein-coding  
arginine/se protein-coding  
lysosomal-; protein-coding  
tripartite r protein-coding  
zinc finger protein-coding  
neutral sph protein-coding  
UDP-Gal:bε protein-coding  
procollage protein-coding  
neurogenir protein-coding  
serglycin protein-coding  
SMAD fami protein-coding  
F-box prote protein-coding  
maestro hε protein-coding  
cadherin 1: protein-coding  
calcium/ca protein-coding  
chemokine protein-coding  
methyltran protein-coding  
prostaglan protein-coding  
GID comple protein-coding  
leucine rich protein-coding  
family with protein-coding  
ribosomal j protein-coding  
WW domai protein-coding  
nuclear rec protein-coding  
Max protei protein-coding  
furin (paire protein-coding  
ribosomal j protein-coding  
heterogenε protein-coding  
glucose-fru protein-coding  
ubiquitin p protein-coding  
Rho guanin protein-coding  
U7 snRNP-; protein-coding  
zinc finger, protein-coding  
transmemk protein-coding  
RAS relatec protein-coding  
genetic sup protein-coding  
family with protein-coding  
schwannor protein-coding  
DENN/MAI protein-coding

transport a protein-coding  
pre B cell lε protein-coding  
branched c protein-coding  
interleukin protein-coding  
transcriptic protein-coding  
protein dis protein-coding  
zinc finger protein-coding  
methyl-Cp( protein-coding  
solute carri protein-coding  
fibroblast g protein-coding  
tetratricop protein-coding  
docking pr( protein-coding  
capping pr( protein-coding  
large tumo protein-coding  
ubiquitin-a protein-coding  
stromal ani protein-coding  
oxysterol b protein-coding  
apoptosis i protein-coding  
ELOVL fam protein-coding  
ubiquitin s( protein-coding  
olfactory rε protein-coding  
interleukin protein-coding  
leucine zip( protein-coding  
sema domε protein-coding  
leucine zip( protein-coding  
nuclear rec protein-coding  
forkhead b protein-coding  
mindbomb protein-coding  
poly(A) bin protein-coding  
solute carri protein-coding  
carbohydrε protein-coding  
structural r protein-coding  
nuclear tra protein-coding  
colony stirr protein-coding  
small integ protein-coding  
casein kina protein-coding  
Ras homolε protein-coding  
trans-actin( protein-coding  
transforme protein-coding  
signal trans protein-coding  
ecotropic v protein-coding  
coiled-coil- protein-coding  
suppressor protein-coding  
ataxin 10 protein-coding  
ladybird hc protein-coding  
elastin mic protein-coding  
early endo: protein-coding

neuropilin protein-coding  
BTB and CN protein-coding  
ras respons protein-coding  
GTP-bindin protein-coding  
G protein  $\beta$  protein-coding  
SHQ1 homi protein-coding  
SET domair protein-coding  
Rho guanin protein-coding  
arachidona protein-coding  
actin, beta protein-coding  
stathmin 1 protein-coding  
interleukin protein-coding  
neuralized- protein-coding  
RAS p21 pr protein-coding  
SWI/SNF  $\epsilon$  protein-coding  
leucine rich protein-coding  
SUMO1/se protein-coding  
pyruvate ki protein-coding  
protein tyr protein-coding  
methylmal protein-coding  
phospholip protein-coding  
potassium protein-coding  
SAM doma protein-coding  
MMS22-lik protein-coding  
WD repeat protein-coding  
elongation protein-coding  
seven in ab protein-coding  
jun B proto protein-coding  
left-right d protein-coding  
glutamyl-tf protein-coding  
HIV TAT sp protein-coding  
Fgfr1op N-i protein-coding  
transcriptic protein-coding  
homeobox protein-coding  
ribosomal j protein-coding  
triple funct protein-coding  
DDHD dom protein-coding  
retinoblast protein-coding  
extended s protein-coding  
estrogen- $\alpha$  protein-coding  
dihydrolipc protein-coding  
TRAF2 and protein-coding  
1-acylglyce protein-coding  
NUAK fami protein-coding  
activin A re protein-coding  
RAB21, me protein-coding  
integral me protein-coding



trinucleotic protein-coding  
MAF1 hom protein-coding  
START dom protein-coding  
regulatory protein-coding  
activating t protein-coding  
ceramide k protein-coding  
ubiquitin s<sub>1</sub> protein-coding  
v-raf-leuke protein-coding  
mitogen-ac protein-coding  
CCR4-NOT protein-coding  
family with protein-coding  
transmemk protein-coding  
CD44 antig protein-coding  
lipoma HM protein-coding  
ADP-depen protein-coding  
forkhead b protein-coding  
gonadotroj protein-coding  
solute carri protein-coding  
acyl-CoA th protein-coding  
nitrilase 1 protein-coding  
poliovirus r protein-coding  
ankyrin re<sub>1</sub> protein-coding  
leucine rich protein-coding  
phospholip protein-coding  
gametoger protein-coding  
methionine<sub>1</sub> protein-coding  
paraneopl<sub>1</sub> protein-coding  
syntrophin<sub>1</sub> protein-coding  
pyrophospl protein-coding  
coatomer  $\zeta$  protein-coding  
anaphase  $\zeta$  protein-coding  
eukaryotic protein-coding  
mitochond protein-coding  
MAP kinas<sub>1</sub> protein-coding  
RAB14, me protein-coding  
fibrillin 1 protein-coding  
low density protein-coding  
chemokine protein-coding  
peptidyl-pr protein-coding  
phosphoin<sub>1</sub> protein-coding  
POC1 centr protein-coding  
zinc finger protein-coding  
Rho GTPas<sub>1</sub> protein-coding  
RIKEN cDN<sub>1</sub> protein-coding  
annexin A2 protein-coding  
family with protein-coding  
acyl-CoA sy protein-coding

calcium/ca protein-coding  
tektin 1 protein-coding  
TM2 doma protein-coding  
kelch-like 6 protein-coding  
retinol dehydrogenase protein-coding  
t-complex protein-coding  
A kinase (PKA) protein-coding  
integrin  $\alpha 4$  protein-coding  
RIKEN cDNA protein-coding  
phosphatidylethanolamine protein-coding  
internexin protein-coding  
CDC like kinase protein-coding  
chemokine protein-coding  
RIKEN cDNA protein-coding  
cytochrome protein-coding  
carboxypeptidase protein-coding  
diacylglycerol protein-coding  
vascular endothelial protein-coding  
ATPase, Na<sup>+</sup>/K<sup>+</sup> protein-coding  
homeobox protein-coding  
protein phosphatase protein-coding  
ankyrin repeat protein-coding  
ribosomal protein-coding  
zinc finger protein-coding  
RIKEN cDNA protein-coding  
immediate early protein-coding  
hemopoietin protein-coding  
zinc finger, C2H2 type protein-coding  
suppressor protein-coding  
glutamate dehydrogenase protein-coding  
growth differentiation factor protein-coding  
phospholipase protein-coding  
zinc finger protein-coding  
influenza virus protein-coding  
RIKEN cDNA protein-coding  
poly (ADP-ribose) protein-coding  
WAP four-disulfide core protein-coding  
icosahedral virus protein-coding  
family with serine/threonine protein-coding  
adaptor-related protein-coding  
neuroblastoma protein-coding  
dickkopf homolog protein-coding  
SUMO/senescence protein-coding  
E1A binding protein-coding  
BMP2 inducible protein-coding  
ring finger protein-coding  
processing protein-coding

early growth protein-1 protein-coding  
GA repeat protein-coding  
proline-rich protein-coding  
5-methyltetrahydropteroylglutamate protein-coding  
XRCC6 binding protein-1 protein-coding  
upstream binding factor 1 protein-coding  
phospholipase C protein-coding  
STE20-like protein-coding  
eukaryotic translation initiation factor 4E protein-coding  
PTK2 protein-coding  
cDNA sequence protein-coding  
mitochondrial protein-coding  
ankyrin repeat protein-coding  
actin related protein-1 protein-coding  
astrotactin protein-coding  
galactosyltransferase protein-coding  
layilin protein-coding  
adenylate cyclase protein-coding  
RAB37, member protein-coding  
AT rich interdomain protein-coding  
regulating factor protein-coding  
ligase III, DNA protein-coding  
special AT-binding protein-1 protein-coding  
small cell lung cancer protein-coding  
chemokine protein-coding  
intercellular adhesion molecule-1 protein-coding  
PHD and histone demethylase protein-coding  
protein inhibitor protein-1 protein-coding  
hepatocyte protein-coding  
glyceraldehyde 3-phosphate dehydrogenase protein-coding  
methyltransferase protein-coding  
influenza virus protein-coding  
A kinase (PKA) protein-coding  
GTP binding protein-coding  
ferrous ion (fms/fpr) protein-coding  
translin-associated protein-coding  
ribosomal protein L10 protein-coding  
syntaxin 4 protein-coding  
midasin homolog protein-coding  
immediate protein-coding  
carbonic anhydrase protein-coding  
glutathione protein-coding  
consortin, protein-coding  
cyclin J protein-coding  
FK506 binding protein-1 protein-coding  
IscU iron-sulfur protein-coding  
guanine nucleotide protein-coding

transmemk protein-coding  
D-tyrosyl-tl protein-coding  
aryl-hydroc protein-coding  
vestigial lik protein-coding  
Y box prote protein-coding  
MAP-kinas protein-coding  
family with protein-coding  
coiled-coil protein-coding  
rhomboid protein-coding  
zinc finger protein-coding  
Kruppel-lik protein-coding  
protein tyr protein-coding  
methyl-Cp protein-coding  
RIKEN cDN. protein-coding  
BCL6 inter protein-coding  
claspin protein-coding  
GATA bindi protein-coding  
proline rich protein-coding  
PH domain protein-coding  
presenilin protein-coding  
ras respons protein-coding  
AT-hook tr protein-coding  
coiled-coil protein-coding  
transmemk protein-coding  
crystallin, protein-coding  
Ral GTPase protein-coding  
cell divisior protein-coding  
thioredoxir protein-coding  
hect (homc protein-coding  
craniofacia protein-coding  
protein tyr protein-coding  
protein-O protein-coding  
Scm-like wi protein-coding  
piezo-type protein-coding  
excision rej protein-coding  
tetratricop protein-coding  
ATPase, Ca protein-coding  
E2F transcr protein-coding  
histidine ar protein-coding  
major facili protein-coding  
glucose-fru protein-coding  
cDNA sequ protein-coding  
enoyl Coen protein-coding  
outer dens protein-coding  
Hedgehog- protein-coding  
RIKEN cDN. protein-coding  
transforma protein-coding

POZ (BTB) ; protein-coding  
Rho family protein-coding  
exocyst cor protein-coding  
mitochond protein-coding  
elongation protein-coding  
TRM2 tRNA protein-coding  
eukaryotic protein-coding  
phosphodi protein-coding  
ribosomal j protein-coding  
pleiomorpl protein-coding  
fibronectin protein-coding  
potassium protein-coding  
mesoderm protein-coding  
glycogen sy protein-coding  
Kruppel-lik protein-coding  
plasminoge protein-coding  
predicted ξ protein-coding  
solute carri protein-coding  
SMAD fami protein-coding  
talin 1 protein-coding  
integrin alç protein-coding  
microsoma protein-coding  
dachshund protein-coding  
solute carri protein-coding  
methylthio protein-coding  
transmemk protein-coding  
RIKEN cDN. protein-coding  
SUZ RNA bi protein-coding  
ribonuclea: protein-coding  
ATPase, Ca protein-coding  
plexin C1 protein-coding  
nucleolar p protein-coding  
reticulocal protein-coding  
tribbles ho protein-coding  
RIKEN cDN. protein-coding  
protein-O-r protein-coding  
GTPase act protein-coding  
RIKEN cDN. protein-coding  
G protein-c protein-coding  
p21 proteir protein-coding  
complemei protein-coding  
Moloney le protein-coding  
RIKEN cDN. protein-coding  
branched c protein-coding  
Mdm2, tra protein-coding  
B cell trans protein-coding  
interleukin protein-coding

COP9 (cons protein-coding  
Hus1 homc protein-coding  
RIKEN cDN. protein-coding  
paired box protein-coding  
GRAM dor protein-coding  
sine oculis- protein-coding  
TWIST neig protein-coding  
orofacial cl protein-coding  
serine/argi protein-coding  
mitogen-ac protein-coding  
SWI/SNF re protein-coding  
family with protein-coding  
MAD2 mitc protein-coding  
guanidinoa protein-coding  
leucine rich protein-coding  
cDNA sequ protein-coding  
cystatin 10 protein-coding  
exportin 7 protein-coding  
alpha fetoç protein-coding  
Sin3-associ protein-coding  
arginine/se protein-coding  
TBC1 doma protein-coding  
myotubula protein-coding  
C-type lecti protein-coding  
transformii protein-coding  
ariadne ub protein-coding  
G-rich RNA protein-coding  
interferon protein-coding  
small ArfG/ protein-coding  
membrane protein-coding  
peripheral protein-coding  
trinucleotic protein-coding  
eukaryotic protein-coding  
insulin-like protein-coding  
family with protein-coding  
ER membrç protein-coding  
musculin protein-coding  
discs, large protein-coding  
glutamate protein-coding  
microsoma protein-coding  
lysosomal t protein-coding  
grancalcin protein-coding  
leucine rich protein-coding  
ATP/GTP bi protein-coding  
CREB/ATF l protein-coding  
PR domain protein-coding  
transforme protein-coding

suppressor protein-coding  
calpain 9 protein-coding  
PTK2 prote protein-coding  
Pbx/knotte protein-coding  
cytochrom protein-coding  
methyltran protein-coding  
ribosomal l protein-coding  
hydroxyste protein-coding  
mediator c protein-coding  
RIKEN cDN. protein-coding  
CD33 antig protein-coding  
sestrin 2 protein-coding  
protocadhe protein-coding  
ADP-ribosy protein-coding  
phosphata: protein-coding  
a disintegri protein-coding  
transmemk protein-coding  
uridine mo protein-coding  
glucosamir protein-coding  
vacuolar pr protein-coding  
ubiquitin s protein-coding  
zinc finger protein-coding  
heterogen protein-coding  
mitogen-ac protein-coding  
sorting nex protein-coding  
coiled-coil- protein-coding  
RNA bindin protein-coding  
inositol mo protein-coding  
ets variant protein-coding  
zinc finger protein-coding  
late endosc protein-coding  
maternal e protein-coding  
UDP-N-ace protein-coding  
karyopheri protein-coding  
UDP-GlcNA protein-coding  
D4, zinc an protein-coding  
pleckstrin l protein-coding  
coiled-coil protein-coding  
calcium an protein-coding  
solute carri protein-coding  
NUF2, NDC protein-coding  
tumor prot protein-coding  
transducin protein-coding  
ubiquitinat protein-coding  
coagulator protein-coding  
B cell CLL/l protein-coding  
suppressor protein-coding

prohibitin protein-coding  
bleomycin protein-coding  
DCP2 deca protein-coding  
RIKEN cDN. protein-coding  
zinc finger protein-coding  
Bloom sync protein-coding  
LIM domai protein-coding  
frizzled hor protein-coding  
ATP-bindin protein-coding  
rogdi homc protein-coding  
spermatog protein-coding  
translocase protein-coding  
tumor necr protein-coding  
transgelin : protein-coding  
shugoshin- protein-coding  
guanine nu protein-coding  
dolichol-ph protein-coding  
transmemk protein-coding  
mediator c protein-coding  
denticules protein-coding  
proline-ser protein-coding  
leukocyte r protein-coding  
peroxisom: protein-coding  
CUE domai protein-coding  
ets variant protein-coding  
zinc finger protein-coding  
cell divisior protein-coding  
STAM bind protein-coding  
UDP-Gal:bε protein-coding  
sterile alph protein-coding  
pellino 2 protein-coding  
cytochrom: protein-coding  
antagonist protein-coding  
monooxyg: protein-coding  
minichrom protein-coding  
charged m: protein-coding  
SPARC rela protein-coding  
ADP-ribosy protein-coding  
glutaminas protein-coding  
mitochond protein-coding  
lactase protein-coding  
SAC1 (supp protein-coding  
ribosomal | protein-coding  
transforma protein-coding  
protein tyr: protein-coding  
KH domain protein-coding  
glucuronid: protein-coding



RIKEN cDN. protein-coding  
CD300A an protein-coding  
IQ motif an protein-coding  
COMM dor protein-coding  
pumilio RN protein-coding  
family with protein-coding  
procollagei protein-coding  
dual specifi protein-coding  
lysine (K)-s protein-coding  
FBJ osteosar protein-coding  
transmembr protein-coding  
sortilin 1 protein-coding  
activating t protein-coding  
heterogene protein-coding  
sorting nex protein-coding  
a disintegrin protein-coding  
diacylglycerol protein-coding  
gelsolin protein-coding  
SMAD spec protein-coding  
tubulin tyrosin protein-coding  
septin 5 protein-coding  
ataxin 1-like protein-coding  
adiponectin protein-coding  
solute carrier protein-coding  
growth hormone protein-coding  
zinc finger protein-coding  
rhomboid 5 protein-coding  
androglobin protein-coding  
sorting nex protein-coding  
myosin, heavy protein-coding  
leucine-rich protein-coding  
methylene protein-coding  
human immunodeficiency protein-coding  
synuclein, alpha protein-coding  
Rab geranyl protein-coding  
tumor suppressor protein-coding  
profilin 1 protein-coding  
muscleblind protein-coding  
demethylase protein-coding  
prothymosin protein-coding  
HtrA serine protein-coding  
rhomboid 4 protein-coding  
phenylalanine protein-coding  
thymocyte protein-coding  
upstream tyrosin protein-coding  
mannosidase protein-coding  
spermatogonium protein-coding

La ribonucl protein-coding  
adaptor pri protein-coding  
ankyrin reꝑ protein-coding  
zinc finger protein-coding  
tripartite r protein-coding  
protein kin protein-coding  
praja 2, RIN protein-coding  
histone clu protein-coding  
tripartite r protein-coding  
FAT tumor protein-coding  
general tra protein-coding  
hect domai protein-coding  
mucosa ass protein-coding  
BCL2-like 1 protein-coding  
transcriptic protein-coding  
retinoid X r protein-coding  
sterol-C5-d protein-coding  
serine thre protein-coding  
B cell CLL/l protein-coding  
transmemt protein-coding  
RIKEN cDN. protein-coding  
YOD1 OTU protein-coding  
SAFB-like, t protein-coding  
pecanex hc protein-coding  
N-acetyltra protein-coding  
thrombopc protein-coding  
thioredoxir protein-coding  
neuritin 1 protein-coding  
DnaJ (Hsp4 protein-coding  
calcyphosp protein-coding  
family with protein-coding  
latent tran: protein-coding  
YY1 associæ protein-coding  
ankyrin reꝑ protein-coding  
sema domæ protein-coding  
fibronectin protein-coding  
thioredoxir protein-coding  
cyclin D3 protein-coding  
angel homi protein-coding  
Y box prote protein-coding  
leucine rich protein-coding  
dedicator c protein-coding  
S-phase kir protein-coding  
serine/thre protein-coding  
adenylosuc protein-coding  
programmæ protein-coding  
forkhead b protein-coding

eukaryotic protein-coding  
fukutin protein-coding  
UDP-N-ace protein-coding  
transcriptic protein-coding  
expressed : protein-coding  
ubiquitin-c protein-coding  
solute carri protein-coding  
FYVE, RhoC protein-coding  
UDP-N-ace protein-coding  
kelch-like 1 protein-coding  
aryl-hydroc protein-coding  
XRCC6 binc protein-coding  
C-type lecti protein-coding  
olfactomec protein-coding  
OTU domai protein-coding  
ST3 beta-g; protein-coding  
ankyrin rep; protein-coding  
adenosine protein-coding  
DNA segme protein-coding  
small nucle protein-coding  
protein-O-r protein-coding  
acid-sensin protein-coding  
zinc finger protein-coding  
citron protein-coding  
multiple in; protein-coding  
serine inco protein-coding  
peroxisom; protein-coding  
leucine rich protein-coding  
phosphogl; protein-coding  
dymeclin protein-coding  
receptor tr protein-coding  
SR-related protein-coding  
JAZF zinc fi protein-coding  
protein tyr; protein-coding  
phosphatic protein-coding  
amino-tern protein-coding  
CDC-like kii protein-coding  
zinc finger protein-coding  
GPI anchor protein-coding  
zinc finger protein-coding  
prostaglan; protein-coding  
presenilin 2 protein-coding  
3-hydroxy- protein-coding  
DnaJ (Hsp4 protein-coding  
bromodom protein-coding  
predicted ξ protein-coding  
family with protein-coding

ATPase, Ca protein-coding  
golgi reass protein-coding  
tight juncti protein-coding  
ATP-bindin protein-coding  
YEATS dom protein-coding  
transcripti protein-coding  
general tra protein-coding  
transforma protein-coding  
pleckstrin l protein-coding  
squamous protein-coding  
StAR-relate protein-coding  
FK506 bind protein-coding  
heat shock protein-coding  
Nedd4 fam protein-coding  
ATP-bindin protein-coding  
zinc finger protein-coding  
egl-9 family protein-coding  
vacuolar pr protein-coding  
proteasom protein-coding  
glutaredox protein-coding  
Jun dimeriz protein-coding  
CDC14 cell protein-coding  
ceramide s protein-coding  
NEDD4 bin protein-coding  
filamin A in protein-coding  
enhancer c protein-coding  
furry homc protein-coding  
arrestin do protein-coding  
FAST kinas protein-coding  
glutamate protein-coding  
calsyntenir protein-coding  
reticuloenc protein-coding  
RAB33B, m protein-coding  
signal trans protein-coding  
transmemk protein-coding  
potassium protein-coding  
vav 3 onco protein-coding  
cyclin-depe protein-coding  
ATP-bindin protein-coding  
folliculin in protein-coding  
archaelysin protein-coding  
growth fac protein-coding  
glutamate protein-coding  
dedicator c protein-coding  
transmemk protein-coding  
poly (ADP-i protein-coding  
sema dom protein-coding

ELKS/RAB6 protein-coding  
solute carri protein-coding  
sorting nex protein-coding  
serpine1 m protein-coding  
human imr protein-coding  
adducin 1 ( protein-coding  
BCL2-like 1 protein-coding  
methionine protein-coding  
prostaglan protein-coding  
nuclear tra protein-coding  
nicotinami protein-coding  
toll-like rec protein-coding  
DAZ intera protein-coding  
tocopherol protein-coding  
mediator c protein-coding  
cytochrom protein-coding  
transformii protein-coding  
protein kin protein-coding  
MAP/micrc protein-coding  
spleen focl protein-coding  
metaxin 2 protein-coding  
TANK-bindi protein-coding  
transmemk protein-coding  
protein tyr protein-coding  
AT rich inte protein-coding  
spectrin re protein-coding  
thrombosp protein-coding  
bone marr protein-coding  
FUN14 don protein-coding  
dual specifi protein-coding  
solute carri protein-coding  
thyroid stir protein-coding  
myeloblast protein-coding  
thiamine p protein-coding  
protein kin protein-coding  
oxytocin re protein-coding  
deformed ε protein-coding  
AF4/FMR2 protein-coding  
solute carri protein-coding  
eukaryotic protein-coding  
5,10-methy protein-coding  
phosphatic protein-coding  
neutral sp protein-coding  
myosin IE protein-coding  
cyclin D1 protein-coding  
mitochond protein-coding  
fibroblast g protein-coding

phospholip protein-coding  
DEAD (Asp- protein-coding  
ubiquitin-li protein-coding  
immediate protein-coding  
zinc finger protein-coding  
Gardner-R $\epsilon$  protein-coding  
runt relate protein-coding  
INO80 hom protein-coding  
sortilin-rel $\epsilon$  protein-coding  
mesoderm protein-coding  
SH3 domai protein-coding  
crystallin,  $\xi$  protein-coding  
SRY (sex de protein-coding  
reactive ox protein-coding  
lactamase, protein-coding  
mitochond protein-coding  
signal trans protein-coding  
transmemk protein-coding  
choline/etf protein-coding  
diacylglyce protein-coding  
aspartic pe protein-coding  
DNA cross- protein-coding  
CXADR-like protein-coding  
U1 small n $\nu$  protein-coding  
Tp53rk bin $\nu$  protein-coding  
basic helix- protein-coding  
cytochrom $\nu$  protein-coding  
suppressor protein-coding  
dapper hor protein-coding  
arginyltran protein-coding  
Fanconi an protein-coding  
CUB and S $\nu$  protein-coding  
NUAK fami protein-coding  
sideroflexir protein-coding  
actin relate protein-coding  
RB1-induci protein-coding  
solute carri protein-coding  
ATPase, cla protein-coding  
serrate RN, protein-coding  
NLR family, protein-coding  
golgi autoa protein-coding  
fibroblast  $\xi$  protein-coding  
succinate-C protein-coding  
Rho GTPas $\nu$  protein-coding  
solute carri protein-coding  
androglobi protein-coding  
carboxylesi protein-coding

RIKEN cDN. protein-coding  
zinc finger protein-coding  
progesterone protein-coding  
soluble carrier protein-coding  
aldehyde dehydrogenase protein-coding  
interferon  $\gamma$  protein-coding  
testis expressed protein-coding  
Fyn proto-oncogene protein-coding  
RIKEN cDN. protein-coding  
mast cell chaperone protein-coding  
cyclin B1 inhibitor protein-coding  
jerky protein-coding  
zinc finger protein-coding  
F-box protein-coding  
phosphotyrosine protein-coding  
phosphofurin phosphatase protein-coding  
nucleus-associated protein-coding  
PHD finger protein-coding  
killer cell lectin protein-coding  
bromodomain protein-coding  
retinoic acid receptor protein-coding  
SH3 domain protein-coding  
phospholipase protein-coding  
START domain protein-coding  
upstream kinase protein-coding  
vestigial like protein-coding  
heterogeneous protein-coding  
tumor-suppressor protein-coding  
RRP9, small protein-coding  
caveolin 2 protein-coding  
zinc finger protein-coding  
down-regulator protein-coding  
phosphodiesterase protein-coding  
gelsolin protein-coding  
deformed  $\epsilon$  protein-coding  
S100 calcium protein-coding  
PR domain protein-coding  
frizzled homolog protein-coding  
chemokine protein-coding  
Williams Be protein-coding  
F-box and  $\lambda$  protein-coding  
MyoD family protein-coding  
inositol polyphosphate protein-coding  
aldehyde dehydrogenase protein-coding  
echinoderm protein-coding  
RIKEN cDN. protein-coding  
phosphatidyl protein-coding

sorting nex protein-coding  
ribosomal l protein-coding  
solute carri protein-coding  
CD97 antig protein-coding  
Y box prote protein-coding  
phosphatic protein-coding  
E74-like fac protein-coding  
UDP-glucos protein-coding  
Nedd4 fam protein-coding  
formin-like protein-coding  
MAP3K12 l protein-coding  
ELM2 and l protein-coding  
SNF relatec protein-coding  
eukaryotic protein-coding  
hexokinase protein-coding  
RAD23b ho protein-coding  
ubiquitin-c protein-coding  
glycogenin protein-coding  
astrotactin protein-coding  
guanine nu protein-coding  
mitochond protein-coding  
pleckstrin l protein-coding  
SPEN homc protein-coding  
protein kin protein-coding  
N-myc dow protein-coding  
lectin, gala protein-coding  
plectin protein-coding  
calpain 2 protein-coding  
membrane protein-coding  
TSC22 dom protein-coding  
protein tyr protein-coding  
otogelin-lik protein-coding  
cDNA sequ protein-coding  
Fanconi an protein-coding  
male enha protein-coding  
RIKEN cDN. protein-coding  
adenylate l protein-coding  
solute carri protein-coding  
anterior gr protein-coding  
RCSD domc protein-coding  
ArfGAP wit protein-coding  
COMM dor protein-coding  
cullin 5 protein-coding  
GTP bindin protein-coding  
protein phc protein-coding  
vesicle ami protein-coding  
RCSD domc protein-coding



regulator o protein-coding  
solute carri protein-coding  
B cell trans protein-coding  
mannosida protein-coding  
mediator c protein-coding  
influenza v protein-coding  
zinc finger, protein-coding  
ras homolc protein-coding  
galanin protein-coding  
RIKEN cDN. protein-coding  
RasGEF do protein-coding  
tribbles ho protein-coding  
wingless-ty protein-coding  
ferric-chela protein-coding  
Moloney s protein-coding  
kinesin farr protein-coding  
carbamoyl- protein-coding  
vacuolar pr protein-coding  
guanine nu protein-coding  
glutamate protein-coding  
G patch do protein-coding  
histone de protein-coding  
scaffolding protein-coding  
spleen tyro protein-coding  
interleukin protein-coding  
PHD finger protein-coding  
HERV-H LTI protein-coding  
beaded fila protein-coding  
bolA-like 3 protein-coding  
peroxisom protein-coding  
solute carri protein-coding  
LIM and se protein-coding  
diphosphoi protein-coding  
crystallin, a protein-coding  
proteasom protein-coding  
HAUS augn protein-coding  
bromodom protein-coding  
heparan su protein-coding  
chromodor protein-coding  
radial spok protein-coding  
SCY1-like 3 protein-coding  
regulatory protein-coding  
vesicle-ass protein-coding  
DENN/MAI protein-coding  
ATP-bindin protein-coding  
NADH dehy protein-coding  
SAYSVFN r protein-coding

bone morph protein-coding  
nucleotide protein-coding  
copine VIII protein-coding  
vacuolar protein-coding  
DEAD (Asp) protein-coding  
kelch-like 2 protein-coding  
kelch-like 9 protein-coding  
amyloid beta protein-coding  
heat shock protein-coding  
apoptosis, protein-coding  
cyclin-dependent protein-coding  
TRIO and F protein-coding  
nuclear receptor protein-coding  
multivesicular protein-coding  
chromodomain protein-coding  
cadherin 1 protein-coding  
thymus, beta protein-coding  
eukaryotic protein-coding  
nascent polypeptide protein-coding  
K(lysine) acetyl protein-coding  
optineurin protein-coding  
T cell activator protein-coding  
RIKEN cDNA protein-coding  
ER lipid raft protein-coding  
discoidin, C protein-coding  
NEDD4 binding protein-coding  
Luc7 homo protein-coding  
homocysteine protein-coding  
mitochondrial protein-coding  
proteasome protein-coding  
arginyl-tRNA protein-coding  
cell division protein-coding  
receptor activator protein-coding  
CD93 antigen protein-coding  
Nfat activator protein-coding  
eukaryotic protein-coding  
KAT8 regulator protein-coding  
family with protein-coding  
LPS-response protein-coding  
Abelson homolog protein-coding  
growth arrest protein-coding  
solute carrier protein-coding  
RIKEN cDNA protein-coding  
discoidin domain protein-coding  
protease, serine protein-coding  
cyclin-dependent protein-coding  
thrombospondin protein-coding

NLR family protein-coding  
exosome c1 protein-coding  
SET domain protein-coding  
TAF7 RNA 1 protein-coding  
RIKEN cDN. protein-coding  
tet methyl protein-coding  
dynein, axc protein-coding  
glutamate protein-coding  
family with protein-coding  
inhibin bet. protein-coding  
reticulon 3 protein-coding  
RIKEN cDN. protein-coding  
ninjurin 2 protein-coding  
ribosomal 1 protein-coding  
ELK3, mem protein-coding  
B cell trans protein-coding  
neurolysin protein-coding  
smu-1 sup1 protein-coding  
KDEL (Lys-1 protein-coding  
polymerase protein-coding  
BTB and C protein-coding  
forkhead b protein-coding  
5-hydroxyt protein-coding  
eukaryotic protein-coding  
eukaryotic protein-coding  
phosphodi protein-coding  
ATPase, H+ protein-coding  
Fanconi an protein-coding  
catenin (ca protein-coding  
polynucleo protein-coding  
arginine an protein-coding  
lymphocyte protein-coding  
scrapie res protein-coding  
inhibitor of protein-coding  
AE binding protein-coding  
KDM1 lysin protein-coding  
ring finger protein-coding  
PRP6 pre-n protein-coding  
solute carri protein-coding  
peroxisom protein-coding  
collagen, t1 protein-coding  
lipase, hep. protein-coding  
enoyl Coen protein-coding  
muscle, ske protein-coding  
keratinocyt protein-coding  
expressed 1 protein-coding  
calcium rel protein-coding

syncytin b protein-coding  
diphthamir protein-coding  
proteasom protein-coding  
Mab-21 do protein-coding  
solute carri protein-coding  
actin-like 7 protein-coding  
ADP-ribosy protein-coding  
CCR4-NOT protein-coding  
REST corep protein-coding  
ATP syntha protein-coding  
low density protein-coding  
paired rela protein-coding  
CCAAT/enf protein-coding  
interferon protein-coding  
mex3 homi protein-coding  
transforme protein-coding  
tRNA meth protein-coding  
Rho GTPasi protein-coding  
serine (or c protein-coding  
AU RNA bir protein-coding  
vomeronas protein-coding  
selectin, lyi protein-coding  
diacylglyce protein-coding  
notch 2 protein-coding  
UDP-N-ace protein-coding  
inositol pol protein-coding  
resistin like protein-coding  
zinc fingers protein-coding  
muscleblin protein-coding  
polycystic l protein-coding  
programm protein-coding  
selenopho protein-coding  
mitochond protein-coding  
ring finger protein-coding  
RIKEN cDN. protein-coding  
thymus cel protein-coding  
Wiskott-Al protein-coding  
nucleolar p protein-coding  
ubiquitin sj protein-coding  
synaptonei protein-coding  
spla/ryano protein-coding  
inositol 1,4 protein-coding  
myosin, ligl protein-coding  
CDC42 effe protein-coding  
caldesmon protein-coding  
phosphogl protein-coding  
acyl-CoA sy protein-coding

nuclear ant protein-coding  
tribbles ho protein-coding  
proteasom protein-coding  
RAN, meml protein-coding  
solute carri protein-coding  
NADH dehy protein-coding  
killer cell le protein-coding  
src family a protein-coding  
cytochrom protein-coding  
feminizatio protein-coding  
proline rich protein-coding  
SH3 and PX protein-coding  
scribbled h protein-coding  
ubiquitin-c protein-coding  
transmemt protein-coding  
zinc finger protein-coding  
FCH domai protein-coding  
exocyst cor protein-coding  
headcase h protein-coding  
RAB11A, m protein-coding  
GINS comp protein-coding  
pleckstrin t protein-coding  
F-box and \ protein-coding  
EH domain protein-coding  
diphthamir protein-coding  
coiled-coil protein-coding  
prothymos protein-coding  
eukaryotic protein-coding  
SET nucleai protein-coding  
basic leucir protein-coding  
CD44 antig protein-coding  
hematopoi protein-coding  
F-box and l protein-coding  
estrogen-r protein-coding  
CUB and S protein-coding  
TATA box t protein-coding  
protease, s protein-coding  
methyltran protein-coding  
monoacylg protein-coding  
interleukin protein-coding  
jade family protein-coding  
steroid 5 al protein-coding  
forkhead b protein-coding  
golgi to ER protein-coding  
solute carri protein-coding  
CXXC finge protein-coding  
spectrin al protein-coding

vaccinia rel protein-coding  
enolase 4 protein-coding  
origin reco protein-coding  
ubiquinol-c protein-coding  
HMG box d protein-coding  
interleukin protein-coding  
xyloside xy protein-coding  
elongator ε protein-coding  
TBC1 domα protein-coding  
ribosomal j protein-coding  
WD repeat protein-coding  
breakpoint protein-coding  
mesoderm protein-coding  
RIKEN cDN. protein-coding  
ADP-ribosy protein-coding  
magnesiun protein-coding  
ribosomal j protein-coding  
dual serine protein-coding  
LEM domai protein-coding  
ubiquitin sj protein-coding  
nicotinami protein-coding  
solute carri protein-coding  
X-prolyl ar protein-coding  
calcium ch; protein-coding  
24-dehydr protein-coding  
mitogen-ac protein-coding  
AT hook co protein-coding  
E2F transcr protein-coding  
K(lysine) ac protein-coding  
rhodopsin protein-coding  
mitochond protein-coding  
Ras-relatec protein-coding  
solute carri protein-coding  
protein ph; protein-coding  
cytidine an protein-coding  
PDZ bindin; protein-coding  
coenzyme i protein-coding  
xanthine di protein-coding  
HERPUD fa protein-coding  
metastasis protein-coding  
intraflagell. protein-coding  
succinyl-Cc protein-coding  
pleckstrin l protein-coding  
chromodor protein-coding  
leucine rich protein-coding  
cyclin E1 protein-coding  
vesicle-ass; protein-coding

ARP3 actin protein-coding  
mannose r protein-coding  
transcripti protein-coding  
oxysterol b protein-coding  
solute carri protein-coding  
RIKEN cDN. protein-coding  
DEAH (Asp. protein-coding  
ring finger protein-coding  
acyl-Coenz' protein-coding  
Tax1 (hum; protein-coding  
Wiskott-Al protein-coding  
tumor necr protein-coding  
SUMO1/se protein-coding  
secernin 1 protein-coding  
fatty acid b protein-coding  
G protein  $\zeta$  protein-coding  
C-terminal protein-coding  
homeobox protein-coding  
C-type lecti protein-coding  
transducin protein-coding  
brain expre protein-coding  
lysine-rich protein-coding  
WD repeat protein-coding  
tribbles ho protein-coding  
gamma-sec protein-coding  
predicted  $\xi$  protein-coding  
leucine rich protein-coding  
small ArfG/ protein-coding  
SMAD fami protein-coding  
protein tyr protein-coding  
E2F transcr protein-coding  
zinc finger, protein-coding  
carboxype $\xi$  protein-coding  
family with protein-coding  
dynactin 5 protein-coding  
solute carri protein-coding  
cell cycle a protein-coding  
solute carri protein-coding  
zinc finger, protein-coding  
minichrom protein-coding  
adhesion r protein-coding  
ST8 alpha-I protein-coding  
interferon protein-coding  
mitochond protein-coding  
histone clu protein-coding  
myosin, he protein-coding  
calmodulin protein-coding

ribosomal | protein-coding  
solute carri protein-coding  
6-phospho protein-coding  
formin bin protein-coding  
zinc finger, protein-coding  
presenilin ε protein-coding  
WD repeat protein-coding  
transmemk protein-coding  
RIKEN cDN. protein-coding  
transmemk protein-coding  
ring finger protein-coding  
DEAD (Asp- protein-coding  
DNA segmε protein-coding  
a disintegri protein-coding  
formin-like protein-coding  
attractin lik protein-coding  
potassium protein-coding  
thyroid stir protein-coding  
CD28 antig protein-coding  
LIM domaii protein-coding  
coiled-coil | protein-coding  
heme bindi protein-coding  
Ral GEF wit protein-coding  
glutathioneε protein-coding  
ets variant protein-coding  
RIKEN cDN. protein-coding  
small integ protein-coding  
ets variant protein-coding  
signal pept protein-coding  
kyphoscoli protein-coding  
SWI/SNF rε protein-coding  
COBW dor protein-coding  
RIKEN cDN. protein-coding  
myristoylat protein-coding  
WD repeat protein-coding  
ELAV (emb protein-coding  
coenzyme | protein-coding  
peptidylprc protein-coding  
NudC dom; protein-coding  
phosphodi protein-coding  
nephronop protein-coding  
structural r protein-coding  
kinesin far protein-coding  
CD200 rece protein-coding  
ring-box 1 protein-coding  
programmε protein-coding  
activated lε protein-coding



CD47 antig protein-coding  
large subur protein-coding  
proteasom protein-coding  
thyrotroph protein-coding  
lipase, mer protein-coding  
zinc finger protein-coding  
G patch do protein-coding  
ATPase, cla protein-coding  
ribulose-5- protein-coding  
poly (ADP- $\gamma$ ) protein-coding  
transferrin protein-coding  
progesterone protein-coding  
proline-rich protein-coding  
prostaglandin protein-coding  
chaperonin protein-coding  
CGG triplet protein-coding  
arrestin do protein-coding  
quiescin Q $\beta$  protein-coding  
phosphoinositide protein-coding  
selenoprotein protein-coding  
sema domain protein-coding  
poly(A) binding protein-coding  
collectin subunit protein-coding  
kelch-like 7 protein-coding  
syntaxin 7 protein-coding  
acidic (leucine) protein-coding  
activated keratin protein-coding  
male-specific protein-coding  
SID1 transmembrane protein-coding  
major facilitator protein-coding  
cadherin-like protein-coding  
transcriptase protein-coding  
salvador homolog protein-coding  
FERM domain protein-coding  
lysine (K)-rich protein-coding  
choline phosphatase protein-coding  
autophagy protein-coding  
cAMP-regulated protein-coding  
junction associated protein-coding  
phosphatidyl protein-coding  
family with protein-coding  
ribosomal protein-coding  
myosin, heavy chain protein-coding  
sex comb on chromosome C protein-coding  
basophilic protein-coding  
diaphanous protein-coding  
pyruvate dehydrogenase protein-coding

phosphodi protein-coding  
tetraspanin protein-coding  
adaptor-re protein-coding  
taperin protein-coding  
GLI pathog protein-coding  
RIKEN cDN. protein-coding  
WD repeat protein-coding  
major facili protein-coding  
dolichol-ph protein-coding  
SMT3 supp protein-coding  
lysine (K)-s protein-coding  
zinc finger protein-coding  
phosphodi protein-coding  
coronin 7 protein-coding  
retinitis pig protein-coding  
tumor supꞑ protein-coding  
nuclear fac protein-coding  
epithelial s protein-coding  
cytochrom protein-coding  
MPN doma protein-coding  
protein kin protein-coding  
basic leucir protein-coding  
translocati protein-coding  
myeloid lei protein-coding  
gap junctio protein-coding  
cylindroma protein-coding  
golgi-specil protein-coding  
HAUS augn protein-coding  
SCAN domꞑ protein-coding  
recombina protein-coding  
copine III protein-coding  
Smad nucle protein-coding  
espin protein-coding  
estrogen rꞑ protein-coding  
nuclear caꞑ protein-coding  
transmemꞑ protein-coding  
ATPase, Ca protein-coding  
predicted ꞑ protein-coding  
growth arrꞑ protein-coding  
solute carri protein-coding  
mitochond protein-coding  
neuromedi protein-coding  
tubulin cof. protein-coding  
amyloid be protein-coding  
membrane protein-coding  
factor 8-as: protein-coding  
neural prec protein-coding

protein ph protein-coding  
carboxype protein-coding  
RIKEN cDN. protein-coding  
family with protein-coding  
UDP-Gal:β protein-coding  
torsin A int protein-coding  
zinc finger protein-coding  
C-type lecti protein-coding  
TAR DNA b protein-coding  
zinc finger protein-coding  
NIMA (nev protein-coding  
BCL2-anta protein-coding  
dehydroge protein-coding  
protein-L-is protein-coding  
nucleobind protein-coding  
stromal int protein-coding  
CART prep protein-coding  
tripartite r protein-coding  
ethanol inc protein-coding  
nucleoredc protein-coding  
zinc finger, protein-coding  
kinesin farr protein-coding  
TGF-beta a protein-coding  
solute carri protein-coding  
lysine (K)-s protein-coding  
polymeras protein-coding  
serine (or c protein-coding  
DEAH (Asp protein-coding  
UDP-Gal:β protein-coding  
lipin 2 protein-coding  
NECAP end protein-coding  
H3 histone protein-coding  
leucine rich protein-coding  
phosphotri protein-coding  
ribosomal j protein-coding  
thymopoie protein-coding  
gastrulatio protein-coding  
Harvey rat protein-coding  
hydroxyacy protein-coding  
SMC hinge protein-coding  
poly (ADP-i protein-coding  
vesicle trar protein-coding  
ATPase, cla protein-coding  
ring finger protein-coding  
solute carri protein-coding  
calcium/ca protein-coding  
inositol 1,4 protein-coding

diacylglyce protein-coding  
LIM domain protein-coding  
mitochond protein-coding  
TGFB-induc protein-coding  
transforma protein-coding  
MRT4, mRf protein-coding  
P450 (cyto protein-coding  
Shc SH2-dc protein-coding  
potassium protein-coding  
septin 9 protein-coding  
tripartite r protein-coding  
CDC42 bind protein-coding  
phosphodi protein-coding  
thioredoxin protein-coding  
interferon protein-coding  
solute carrier protein-coding  
zinc finger, protein-coding  
short coiled protein-coding  
chemokine protein-coding  
EP300 inter protein-coding  
1-acylglyce protein-coding  
signal sequ protein-coding  
transforme protein-coding  
BEN domain protein-coding  
multivesicu protein-coding  
SAC3 domain protein-coding  
mirror-ima protein-coding  
alkB, alkyl protein-coding  
trans-2,3-e protein-coding  
protein phosph protein-coding  
CD200 recept protein-coding  
ribosomal protein-coding  
muscleblin protein-coding  
proteasom protein-coding  
kinesin family protein-coding  
family with protein-coding  
solute carrier protein-coding  
tumor necr protein-coding  
cytochrom protein-coding  
early endo protein-coding  
hexokinase protein-coding  
OTU domain protein-coding  
retinol dehydro protein-coding  
olfactomec protein-coding  
hydroxyste protein-coding  
peptidylprote protein-coding  
transmembr protein-coding

leukotriene protein-coding  
histone de; protein-coding  
cyclin T2 protein-coding  
3'-phospho protein-coding  
C-type lect protein-coding  
peroxisome protein-coding  
tripeptidyl protein-coding  
Riken cDNA protein-coding  
heterogene protein-coding  
aquaporin protein-coding  
asparagine protein-coding  
family with protein-coding  
zinc finger protein-coding  
FERM dom protein-coding  
vacuolar pr protein-coding  
ring finger protein-coding  
aldo-keto r protein-coding  
lysine (K)-s protein-coding  
expressed : protein-coding  
cDNA sequ protein-coding  
nudix (nucl protein-coding  
cyclin E2 protein-coding  
inhibitor of protein-coding  
cyclin D3 protein-coding  
hyaluronog protein-coding  
YTH domai protein-coding  
zinc finger protein-coding  
tetratricop protein-coding  
forkhead b protein-coding  
notch 2 protein-coding  
zinc finger protein-coding  
chemokine protein-coding  
MOB kinas protein-coding  
avian musc protein-coding  
high mobili protein-coding  
interleukin protein-coding  
dpy-19-like protein-coding  
ski sarcom; protein-coding  
A kinase (P protein-coding  
chaperonir protein-coding  
TLC domair protein-coding  
sideroflexir protein-coding  
hairy and e protein-coding  
ubiquitin ir protein-coding  
interleukin protein-coding  
pleckstrin ε protein-coding  
integrin be protein-coding

adducin 3 ( protein-coding  
family with protein-coding  
solute carri protein-coding  
metaxin 2 protein-coding  
UDP-Gal:b $\epsilon$  protein-coding  
immunogl protein-coding  
low-density protein-coding  
LIM domaii protein-coding  
TGF-beta a protein-coding  
retinoblast protein-coding  
SET binding protein-coding  
Map3k7 C- protein-coding  
ecotropic v protein-coding  
phosphorit protein-coding  
nuclear fac protein-coding  
RIKEN cDN. protein-coding  
protein kin protein-coding  
CDK5 regul protein-coding  
genetic sup protein-coding  
branched c protein-coding  
calcium ch; protein-coding  
X-linked m; protein-coding  
diacylglyce protein-coding  
diacylglyce protein-coding  
basic transi protein-coding  
glycosylph; protein-coding  
Morf4 fami protein-coding  
GNAS (gua; protein-coding  
protein ph; protein-coding  
suppressor protein-coding  
glypican 1 protein-coding  
cell divisor protein-coding  
cytohesin 1 protein-coding  
family with protein-coding  
signal pept protein-coding  
polymerase; protein-coding  
neurotensi protein-coding  
notch 1 protein-coding  
zinc finger protein-coding  
transmemk protein-coding  
peptidogly; protein-coding  
salt inducit protein-coding  
calpastatin protein-coding  
transient r; protein-coding  
cellular nuc; protein-coding  
tumor necr protein-coding  
ribosomal j; protein-coding

timeless cir protein-coding  
c-myc bind protein-coding  
RNA bindin protein-coding  
LIM domaii protein-coding  
deoxyuridii protein-coding  
HERV-H LTI protein-coding  
kinesin far protein-coding  
radical S-ac protein-coding  
serglycin protein-coding  
golgi reass protein-coding  
transmemk protein-coding  
CTF8, chroi protein-coding  
LIM domaii protein-coding  
hemochror protein-coding  
K(lysine) ac protein-coding  
armadillo r protein-coding  
transmemk protein-coding  
poly(rC) bir protein-coding  
plasminogε protein-coding  
RNA 3'-terr protein-coding  
5,10-methy protein-coding  
DDHD dom protein-coding  
glutaminas protein-coding  
UDP-glucos protein-coding  
methyltran protein-coding  
lysosomal ε protein-coding  
bromodom protein-coding  
podoplanir protein-coding  
solute carri protein-coding  
histone clu protein-coding  
mitogen-ac protein-coding  
coagulator protein-coding  
zinc finger protein-coding  
ring finger protein-coding  
solute carri protein-coding  
cDNA sequ protein-coding  
ribonuclea: protein-coding  
RIKEN cDN. protein-coding  
CDK5 regul protein-coding  
RAD50 hon protein-coding  
zinc finger, protein-coding  
lamin B rec protein-coding  
zinc finger, protein-coding  
required fo protein-coding  
ADP-ribosy protein-coding  
POU doma protein-coding  
Wilms tum protein-coding

adrenergic protein-coding  
UBX domain protein-coding  
actin, beta protein-coding  
sirtuin 7 protein-coding  
RAB14, membrane protein-coding  
DNA fragment protein-coding  
sorting nexin protein-coding  
DNA polymerase protein-coding  
adaptor-receptor protein-coding  
phosphodiesterase protein-coding  
doublesex protein-coding  
Ewing tumor protein-coding  
charged multimer protein-coding  
RIKEN cDNA protein-coding  
deleted in liver protein-coding  
ubiquitin p1 protein-coding  
ubiquitin s1 protein-coding  
PX domain protein-coding  
CAP, adenine protein-coding  
C-terminal protein-coding  
arrestin domain protein-coding  
taste receptor protein-coding  
Mediterranean protein-coding  
coiled-coil protein-coding  
RAB11 family protein-coding  
tripartite repeat protein-coding  
sulfite oxidase protein-coding  
zinc finger, protein-coding  
WD repeat protein-coding  
RIKEN cDNA protein-coding  
ezrin protein-coding  
cadherin 1 protein-coding  
placenta-expressed protein-coding  
calcium/calmodulin protein-coding  
microtubule protein-coding  
eukaryotic protein-coding  
mannoside protein-coding  
ADP-ribosyl protein-coding  
estrogen receptor protein-coding  
DNA damage protein-coding  
thioredoxin protein-coding  
testis expressed protein-coding  
achaete-scute protein-coding  
eyes absent protein-coding  
phospholipase protein-coding  
development protein-coding  
INO80 complex protein-coding



DAZ associ: protein-coding  
autophagy protein-coding  
cytochrom: protein-coding  
integrin be protein-coding  
suppressor protein-coding  
ADP-ribosy protein-coding  
F-box prote: protein-coding  
F-box prote: protein-coding  
flavin cont: protein-coding  
alcohol del: protein-coding  
signal trans: protein-coding  
G protein-c: protein-coding  
gamma-am: protein-coding  
solute carri: protein-coding  
LIM domai: protein-coding  
DnaJ (Hsp4: protein-coding  
acetyl-Coe: protein-coding  
transformii: protein-coding  
RIKEN cDN: protein-coding  
adrenergic: protein-coding  
translocase: protein-coding  
interleukin: protein-coding  
phosducin-: protein-coding  
phosphodi: protein-coding  
CCAAT/en: protein-coding  
inverted fo: protein-coding  
aminoadip: protein-coding  
signal trans: protein-coding  
ADP-ribosy: protein-coding  
purine rich: protein-coding  
guanine de: protein-coding  
2-phospho: protein-coding  
spleen tyro: protein-coding  
mitogen-ac: protein-coding  
bone morp: protein-coding  
COP9 (cons: protein-coding  
prefoldin s: protein-coding  
claudin 23: protein-coding  
ATP-bindin: protein-coding  
leucine rich: protein-coding  
TNF recept: protein-coding  
interferon: protein-coding  
protein ph: protein-coding  
vav 2 onco: protein-coding  
coiled-coil: protein-coding  
abhydrolas: protein-coding  
retinol deh: protein-coding

neuregulin protein-coding  
sprouty prc protein-coding  
kelch-like 5 protein-coding  
translocase protein-coding  
optic atrop protein-coding  
zinc finger protein-coding  
translocase protein-coding  
ubiquitin-c protein-coding  
S100 calciu protein-coding  
family with protein-coding  
intercellula protein-coding  
c-Maf indu protein-coding  
limb regior protein-coding  
hypoxia-inc protein-coding  
serglycin protein-coding  
chemokine protein-coding  
inositol pol protein-coding  
feline sarcc protein-coding  
hect domai protein-coding  
RIKEN cDN. protein-coding  
RWD doma protein-coding  
AT-hook tr; protein-coding  
transmemk protein-coding  
smg-8 hom protein-coding  
cell divisior protein-coding  
ornithine a protein-coding  
tetratricop protein-coding  
hydroxyste protein-coding  
solute carri protein-coding  
cell divisior protein-coding  
cornichon l protein-coding  
mannosida protein-coding  
polo-like ki protein-coding  
ribosomal j protein-coding  
nucleopori protein-coding  
cellular rep protein-coding  
endonucle; protein-coding  
proline del protein-coding  
RIKEN cDN. protein-coding  
heat shock protein-coding  
Cas scaffol protein-coding  
protein kin protein-coding  
serine/argi protein-coding  
UTP18, sm; protein-coding  
NOP56 ribc protein-coding  
chromodor protein-coding  
capping pr; protein-coding

serine/argi protein-coding  
zinc finger protein-coding  
vesicle-ass protein-coding  
glutamyl ar protein-coding  
potassium protein-coding  
cyclin-depe protein-coding  
zinc finger protein-coding  
mitogen-ac protein-coding  
actin relate protein-coding  
protein ph protein-coding  
CWC25 spli protein-coding  
Meis home protein-coding  
regulator o protein-coding  
cytochrom protein-coding  
Kruppel-lik protein-coding  
dihydropyr protein-coding  
programm protein-coding  
family with protein-coding  
clathrin, lig protein-coding  
microtubul protein-coding  
nicotinami protein-coding  
DEP domai protein-coding  
GRB2-relat protein-coding  
secretory c protein-coding  
adenylate l protein-coding  
tripartite n protein-coding  
interferon protein-coding  
predicted ξ protein-coding  
KxDL motif protein-coding  
leucine-ricl protein-coding  
ligase IV, D protein-coding  
ataxin 10 protein-coding  
sterile alph protein-coding  
RAB12, me protein-coding  
HEAT repe protein-coding  
CDK5 regul protein-coding  
sema dom protein-coding  
valosin con protein-coding  
jun proto-c protein-coding  
phosphorik protein-coding  
fibronectin protein-coding  
adducin 3 ( protein-coding  
COP9 (cons protein-coding  
FK506 bind protein-coding  
sal-like 1 (L protein-coding  
ribosomal l protein-coding  
proline rich protein-coding

basic leucir protein-coding  
interferon protein-coding  
transmemk protein-coding  
patatin-like protein-coding  
Kruppel-lik protein-coding  
NLR family, protein-coding  
Ras associa protein-coding  
splA/ryano protein-coding  
zinc finger protein-coding  
Sp140 nucl protein-coding  
RIKEN cDN. protein-coding  
platelet de protein-coding  
Fc receptor protein-coding  
GSK3B inte protein-coding  
fibronectin protein-coding  
cyclin L1 protein-coding  
amyotroph protein-coding  
glucosamin protein-coding  
polyhomec protein-coding  
protein (pe protein-coding  
transformii protein-coding  
protein arg protein-coding  
matrix met protein-coding  
lysozyme-li protein-coding  
transcriptic protein-coding  
predicted g protein-coding  
jade family protein-coding  
PDZ domai protein-coding  
proteasom protein-coding  
lysine (K)-s protein-coding  
DEAD (Asp. protein-coding  
oxysterol b protein-coding  
leucine rich protein-coding  
melanocyt protein-coding  
histone de; protein-coding  
transcriptic protein-coding  
ribophorin protein-coding  
SCY1-like 1 protein-coding  
mitogen-ac protein-coding  
solute carri protein-coding  
exostoses ( protein-coding  
pleckstrin l protein-coding  
voltage-de; protein-coding  
Rab interac protein-coding  
immediate protein-coding  
septin 9 protein-coding  
predicted g protein-coding

zinc finger, protein-coding  
stromal int protein-coding  
family with protein-coding  
cyclin-depe protein-coding  
eukaryotic protein-coding  
coactosin-I protein-coding  
CLIP associ protein-coding  
RIKEN cDN. protein-coding  
CD274 anti protein-coding  
lysosomal t protein-coding  
phosphatic protein-coding  
polymerase protein-coding  
mitochond protein-coding  
1-acylglyce protein-coding  
RAB2A, me protein-coding  
polyhomec protein-coding  
NSFL1 (p97 protein-coding  
thioredoxin protein-coding  
fibroblast g protein-coding  
ATPase, Ca protein-coding  
SET domain protein-coding  
ankyrin re protein-coding  
missing oo protein-coding  
cytochrome protein-coding  
phosphoric protein-coding  
alpha-2-gly protein-coding  
unc-119 hc protein-coding  
sterile alph protein-coding  
lymphoblast protein-coding  
protein tyrosine protein-coding  
transcriptic protein-coding  
protein kinase protein-coding  
plexin C1 protein-coding  
actin relate protein-coding  
polycystic l protein-coding  
Max protei protein-coding  
protein phosphatase protein-coding  
early growth protein-coding  
RIKEN cDN. protein-coding  
autophagy protein-coding  
dihydrolipic protein-coding  
synaptic ve protein-coding  
RIKEN cDN. protein-coding  
proteasome protein-coding  
F-box and l protein-coding  
frizzled homolog protein-coding  
elastase, n protein-coding

lysine (K)-s protein-coding  
heterogenε protein-coding  
zinc finger, protein-coding  
ATP-bindin protein-coding  
2-deoxyrib protein-coding  
transthyret protein-coding  
retinoblast protein-coding  
microsoma protein-coding  
chloride ch protein-coding  
stefin A3 protein-coding  
tRNA splici protein-coding  
RIKEN cDN. protein-coding  
solute carri protein-coding  
cyclin Pas1 protein-coding  
ubiquitin-c protein-coding  
transmemk protein-coding  
regulator o protein-coding  
mitogen-ac protein-coding  
prostaglanı protein-coding  
RIKEN cDN. protein-coding  
Rho guanin protein-coding  
collagen, tı protein-coding  
insulin-like protein-coding  
sosondowaε protein-coding  
ectoderma protein-coding  
immunity-r protein-coding  
RIKEN cDN. protein-coding  
phosphose protein-coding  
fatty acyl C protein-coding  
zinc finger protein-coding  
calcitonin ξ protein-coding  
zinc finger protein-coding  
cullin 1 protein-coding  
glutaredox protein-coding  
UDP-Gal:βε protein-coding  
RAB21, me protein-coding  
TBC1 domε protein-coding  
clustered n protein-coding  
thromboxa protein-coding  
transmemk protein-coding  
fukutin relε protein-coding  
aldehyde d protein-coding  
plakophilin protein-coding  
EBNA1 binı protein-coding  
hepatocyte protein-coding  
fibroblast ε protein-coding  
GTPase act protein-coding

ATP-bindin protein-coding  
zinc finger protein-coding  
methionine protein-coding  
supervillin protein-coding  
sushi, nido protein-coding  
NADH dehydrogenase protein-coding  
ring finger protein-coding  
interleukin protein-coding  
differential protein-coding  
zinc finger, protein-coding  
SH3-domain protein-coding  
carbonic anhydrase protein-coding  
I(3)mbt-like protein-coding  
zinc finger protein-coding  
phospholipase protein-coding  
LIM homeobox protein-coding  
phosphatidylinositol protein-coding  
t-complex protein-coding  
mcf.2 transmembrane protein-coding  
zinc finger protein-coding  
Smg-7 homolog protein-coding  
tripartite repeat protein-coding  
ankyrin repeat protein-coding  
PTK2 protein-coding  
MYB binding protein-coding  
establishment protein-coding  
jun proto-oncogene protein-coding  
dual specificity protein-coding  
gasdermin protein-coding  
platelet-activating protein-coding  
insulin receptor protein-coding  
CD33 antigen protein-coding  
Fanconi anemia protein-coding  
solute carrier protein-coding  
placenta-expressed protein-coding  
angel homolog protein-coding  
xylosyltransferase protein-coding  
dual specificity protein-coding  
solute carrier protein-coding  
tumor protein-coding  
transducin protein-coding  
cDNA sequence protein-coding  
MAP kinase protein-coding  
frizzled homolog protein-coding  
testis-expressed protein-coding  
activating transcription protein-coding  
chromodomain protein-coding

glycerate k protein-coding  
outer dens protein-coding  
hexokinase protein-coding  
vasoactive protein-coding  
SEC23A (S. protein-coding  
APC memb protein-coding  
ADP-deper protein-coding  
transmemk protein-coding  
proteasom protein-coding  
GTF2I repe protein-coding  
selectin, lyi protein-coding  
tubulin, alç protein-coding  
calcium/ca protein-coding  
transmemk protein-coding  
ATPase, Ca protein-coding  
abhydrolas protein-coding  
matrix Gla protein-coding  
K(lysine) ac protein-coding  
NOP2 nucl protein-coding  
CART prepi protein-coding  
additional : protein-coding  
cortactin b protein-coding  
heterogenç protein-coding  
deoxyribon protein-coding  
formin binç protein-coding  
tetratricop protein-coding  
leukemia ir protein-coding  
exocyst cor protein-coding  
SEC23B (S. protein-coding  
acyloxyacy protein-coding  
3-oxoacid Ç protein-coding  
zinc finger, protein-coding  
elaC homol protein-coding  
ubiquitin sç protein-coding  
lysosomal-; protein-coding  
nucleic aciç protein-coding  
protein phç protein-coding  
actin relate protein-coding  
stromal ani protein-coding  
chemokine protein-coding  
cathepsin S protein-coding  
thyroid hor protein-coding  
CLIP associ protein-coding  
hook homc protein-coding  
Kruppel-lik protein-coding  
interleukin protein-coding  
elongation protein-coding



biregional ( protein-coding  
kelch-like 2 protein-coding  
adaptor-re protein-coding  
kelch-like 6 protein-coding  
MYC bindir protein-coding  
nuclear tra protein-coding  
thrombosp protein-coding  
DCN1, defe protein-coding  
tripartite r protein-coding  
suppressor protein-coding  
phosphatic protein-coding  
trypsin dor protein-coding  
tensin 4 protein-coding  
family with protein-coding  
leptin rece protein-coding  
suppressor protein-coding  
methylmal protein-coding  
PHD finger protein-coding  
phosphoin protein-coding  
ubiquitin s protein-coding  
MAP/micrc protein-coding  
serine (or c protein-coding  
ectonucleo protein-coding  
plexin D1 protein-coding  
CDC42 sma protein-coding  
glutathione protein-coding  
family with protein-coding  
BPI fold coi protein-coding  
zinc finger protein-coding  
nei endonu protein-coding  
testis and c protein-coding  
protein tyr protein-coding  
myocyte er protein-coding  
growth diff protein-coding  
BCL2 bindir protein-coding  
ring finger protein-coding  
SH2B adap protein-coding  
leucine-ric protein-coding  
unc-51 like protein-coding  
shisa homc protein-coding  
cannabinoi protein-coding  
degenerati protein-coding  
NADH dehy protein-coding  
transmemk protein-coding  
zinc finger protein-coding  
protein ph protein-coding  
doublesex protein-coding

cell cycle p protein-coding  
zinc ribbon protein-coding  
family with protein-coding  
zinc finger protein-coding  
CD80 antig protein-coding  
idnK glucor protein-coding  
F-box and I protein-coding  
intraflagell. protein-coding  
zinc finger protein-coding  
numb gene protein-coding  
mitochond protein-coding  
GTPase act protein-coding  
RIKEN cDN. protein-coding  
family with protein-coding  
SET domair protein-coding  
phosphatic protein-coding  
ankyrin reꝑ protein-coding  
endoplasm protein-coding  
phospholip protein-coding  
bromodom protein-coding  
zinc finger protein-coding  
protein tyr. protein-coding  
chitobiase, protein-coding  
secretory c protein-coding  
toll-like rec protein-coding  
protein kin protein-coding  
enhancer c protein-coding  
cryptochro protein-coding  
interleukin protein-coding  
mastermin protein-coding  
ribosome k protein-coding  
NEDD4 bin. protein-coding  
ring finger protein-coding  
low density protein-coding  
RIKEN cDN. protein-coding  
RNA polym protein-coding  
chromatin protein-coding  
tripartite r protein-coding  
zinc and rir protein-coding  
cAMP resp. protein-coding  
cell divisior protein-coding  
mannoside protein-coding  
ATPase, Na protein-coding  
ADP-ribosy protein-coding  
matrix met protein-coding  
amplified ii protein-coding  
chemokine protein-coding

immunogl protein-coding  
cDNA sequ protein-coding  
TBC1 domæ protein-coding  
mannosida protein-coding  
notchless h protein-coding  
asialoglyco protein-coding  
small nucle protein-coding  
Ras associa protein-coding  
Fas ligand ( protein-coding  
squamous protein-coding  
ubiquitin-c protein-coding  
small nucle protein-coding  
low density protein-coding  
postmeioti protein-coding  
potassium protein-coding  
ubiquitin s1 protein-coding  
CAS1 domæ protein-coding  
Hermansky protein-coding  
solute carri protein-coding  
ubiquitin s1 protein-coding  
engulfmen protein-coding  
glyceronep protein-coding  
LSM6 homi protein-coding  
ADP-ribosy protein-coding  
3'-phosphc protein-coding  
mitochond protein-coding  
solute carri protein-coding  
RIKEN cDN. protein-coding  
disrupted i protein-coding  
LSM2 homi protein-coding  
spindlin 1 protein-coding  
chemokine protein-coding  
tripartite r protein-coding  
tetratricop protein-coding  
carboxype1 protein-coding  
MKL (mega protein-coding  
SURP and C protein-coding  
ankyrin re1 protein-coding  
bromodom protein-coding  
pleckstrin 1 protein-coding  
membrane protein-coding  
B cell leuke protein-coding  
SWI/SNF re protein-coding  
UFM1 spec protein-coding  
RAD9 homi protein-coding  
adenylate 1 protein-coding  
retinoblast protein-coding

autophagy protein-coding  
cell division protein-coding  
proteasome protein-coding  
fragile X mental retardation protein-coding  
ATPase, Ca<sup>2+</sup> protein-coding  
zinc finger protein-coding  
expressed in testis protein-coding  
transmembrane protein-coding  
selectin, type I protein-coding  
protein phosphatase protein-coding  
transmembrane protein-coding  
ring finger protein-coding  
plexin A1 protein-coding  
membrane protein-coding  
zinc finger protein-coding  
protein tyrosine phosphatase protein-coding  
predicted protein-coding  
CKLF-like factor protein-coding  
family with WYFF domain protein-coding  
chondroitinase protein-coding  
peptidylprolyl isomerase protein-coding  
ethanolamine kinase protein-coding  
predicted protein-coding  
androgen receptor protein-coding  
RAB2A, member 2 protein-coding  
multiple C2 domain protein-coding  
zinc finger protein-coding  
integrin beta protein-coding  
biogenesis protein-coding  
exocyst core protein-coding  
zinc finger protein-coding  
prostaglandin synthase protein-coding  
adrenergic protein-coding  
YTH domain protein-coding  
zinc and ring finger protein-coding  
cyclin C protein-coding  
histocompatibility protein-coding  
synaptoneurin protein-coding  
peptidylprolyl isomerase protein-coding  
RIKEN cDNA protein-coding  
solute carrier protein-coding  
TSC2 domain protein-coding  
SFT2 domain protein-coding  
olfactory receptor protein-coding  
dihydrofolate reductase protein-coding  
family with WYFF domain protein-coding  
glutamyl aminotransferase protein-coding

vinculin protein-coding  
WD repeat protein-coding  
B cell leuke protein-coding  
ring finger protein-coding  
zinc finger protein-coding  
predicted  $\xi$  protein-coding  
Ras and Ra protein-coding  
DOT1-like, protein-coding  
pogo trans protein-coding  
cyclin-depe protein-coding  
nebulin-rel protein-coding  
cilia and fla protein-coding  
inhibitor of protein-coding  
sperm anti; protein-coding  
phosphatic protein-coding  
inositol pol protein-coding  
mitochond protein-coding  
glutathione protein-coding  
thymoma v protein-coding  
membrane protein-coding  
ER degrada protein-coding  
BRF1 homc protein-coding  
protein ph; protein-coding  
histocomp; protein-coding  
zinc finger, protein-coding  
transmemk protein-coding  
F-box and \ protein-coding  
resistance i protein-coding  
major facili protein-coding  
B cell trans protein-coding  
erythrocyt; protein-coding  
cytochrom; protein-coding  
UDP-N-ace protein-coding  
ribosomal j protein-coding  
RAB11 fam protein-coding  
torsin A int protein-coding  
solute carri protein-coding  
signal-regu protein-coding  
TGF-beta a protein-coding  
basic trans protein-coding  
interferon protein-coding  
nucleopori protein-coding  
proteasom protein-coding  
cAMP resp; protein-coding  
metaxin 1 protein-coding  
patatin-like protein-coding  
furin (paire protein-coding

major facili protein-coding  
CD47 antig protein-coding  
achaete-sc protein-coding  
myelin pro: protein-coding  
neutrophil protein-coding  
DnaJ (Hsp4 protein-coding  
sterile alph protein-coding  
Rho family protein-coding  
GTPase act protein-coding  
DAZ associ: protein-coding  
jun D protc protein-coding  
eukaryotic protein-coding  
F-box prote protein-coding  
sirtuin 4 protein-coding  
ariadne ub protein-coding  
GLI pathog protein-coding  
expressed : protein-coding  
mannosida protein-coding  
ribosomal | protein-coding  
Ras associa protein-coding  
phosphohi: protein-coding  
RIKEN cDN. protein-coding  
schlafen 1 protein-coding  
Kruppel-lik protein-coding  
ribosomal | protein-coding  
TAF10 RNA protein-coding  
transmemk protein-coding  
trichorhino protein-coding  
zinc finger protein-coding  
estrogen rε protein-coding  
ankyrin reε protein-coding  
synaptotag protein-coding  
chemokine protein-coding  
family with protein-coding  
DEAD/H (A protein-coding  
predicted ε protein-coding  
TATA box b protein-coding  
interferon protein-coding  
gonadotro| protein-coding  
Tax1 (hum: protein-coding  
arginine/se protein-coding  
protein-L-is protein-coding  
RIKEN cDN. protein-coding  
suppressio protein-coding  
trafficking | protein-coding  
transformii protein-coding  
family with protein-coding

compleme protein-coding  
protein-kin protein-coding  
sorting nex protein-coding  
tubulin tyr protein-coding  
bactericida protein-coding  
G patch do protein-coding  
StAR-relate protein-coding  
ATPase, cla protein-coding  
pyroglutar protein-coding  
NCK-associ protein-coding  
schlafen 2 protein-coding  
transmemk protein-coding  
solute carri protein-coding  
cytochrom protein-coding  
CART prepi protein-coding  
acyl-CoA sy protein-coding  
DENN/MAI protein-coding  
ATPase, Na protein-coding  
lon peptid protein-coding  
E74-like fac protein-coding  
interactor c protein-coding  
transmemk protein-coding  
KT112 hom protein-coding  
uridine-cyt protein-coding  
Ras associa protein-coding  
bombesin-l protein-coding  
coiled-coil protein-coding  
tocopherol protein-coding  
leucine rich protein-coding  
coiled-coil protein-coding  
transcriptic protein-coding  
mediator c protein-coding  
natural kill protein-coding  
v-raf-leuke protein-coding  
protein ph protein-coding  
ring finger protein-coding  
secretory c protein-coding  
nuclear rec protein-coding  
DNA-dama protein-coding  
RNA bindin protein-coding  
caspase aci protein-coding  
SLAIN moti protein-coding  
ral guanine protein-coding  
phosphoin protein-coding  
spinster ho protein-coding  
dual specifi protein-coding  
RAB33B, m protein-coding

renalase, F. protein-coding  
ankyrin reꝑ protein-coding  
zinc finger protein-coding  
metadherin protein-coding  
WD repeat protein-coding  
protein tyrosine protein-coding  
RIKEN cDNA protein-coding  
forkhead b protein-coding  
elongation protein-coding  
engulfment protein-coding  
short chain protein-coding  
SMG1 homolog protein-coding  
germ cell-specific protein-coding  
deltex 4 homolog protein-coding  
heat shock protein-coding  
flavin content protein-coding  
src homolog protein-coding  
spindle apparatus protein-coding  
vimentin-type protein-coding  
nuclear receptor protein-coding  
activity-dependent protein-coding  
N-acetylglucosyl protein-coding  
tRNA splicing protein-coding  
leukocyte-specific protein-coding  
SCY1-like 1 protein-coding  
CD274 anti protein-coding  
multiple C2 protein-coding  
ribosomal L protein-coding  
mab-21-like protein-coding  
TAF15 RNA protein-coding  
AF4/FMR2 protein-coding  
DnaJ (Hsp4) protein-coding  
forkhead b protein-coding  
UDP-Galactose 4-epimerase protein-coding  
thyroid hormone protein-coding  
ras homolog protein-coding  
protein inhibitor protein-coding  
HORMA domain protein-coding  
ATPase, Calcium protein-coding  
asparagine protein-coding  
ribosomal J protein-coding  
ceramide-specific protein-coding  
NLR family protein-coding  
ATPase, arginine protein-coding  
nuclear factor protein-coding  
sp1A/ryano protein-coding  
TAF6 RNA protein-coding



coagulation protein-coding  
pecanex-lik protein-coding  
trichoplein protein-coding  
heterogeneous protein-coding  
RasGEF domain protein-coding  
transforming protein-coding  
transmembrane protein-coding  
Hermansky protein-coding  
mitogen-activated protein-coding  
prolactin factor protein-coding  
chromatin protein-coding  
tetraatricop protein-coding  
paralemmin protein-coding  
zinc finger protein-coding  
solute carrier protein-coding  
protocadherin protein-coding  
filamin A intracellular protein-coding  
transcription protein-coding  
mal, T cell protein-coding  
zinc finger protein-coding  
protein phosphatase protein-coding  
fibronectin protein-coding  
endothelin protein-coding  
zinc finger protein-coding  
zinc finger protein-coding  
polypyrimidine protein-coding  
nuclear receptor protein-coding  
angiopoietin protein-coding  
leucine-rich protein-coding  
cDNA sequence protein-coding  
cytochrome protein-coding  
RAB interaction protein-coding  
RIKEN cDNA protein-coding  
septin 5 protein-coding  
translocase protein-coding  
transmembrane protein-coding  
myocyte enhancer protein-coding  
talin 2 protein-coding  
BTG3 associated protein-coding  
differential protein-coding  
potassium protein-coding  
zinc finger protein-coding  
lysine (K)-s protein-coding  
cell division protein-coding  
cyclin-dependent protein-coding  
histone deacetylase protein-coding  
zinc finger protein-coding

metaxin 3 protein-coding  
oxysterol b protein-coding  
family with protein-coding  
sorting nex protein-coding  
APC memb protein-coding  
CDK5 regul protein-coding  
TBC1 doma protein-coding  
tRNA isope protein-coding  
hexose-6-p protein-coding  
RIKEN cDN. protein-coding  
family with protein-coding  
DnaJ (Hsp4 protein-coding  
mortality f; protein-coding  
coiled-coil protein-coding  
nudix (nucl protein-coding  
forkhead b protein-coding  
RIKEN cDN. protein-coding  
cyclin D3 protein-coding  
insulinoma protein-coding  
phosphodi protein-coding  
spermatog protein-coding  
phosphodi protein-coding  
adaptor-re protein-coding  
retinoic aci protein-coding  
sal-like 1 (L protein-coding  
translocase protein-coding  
CDC-like kii protein-coding  
tetratricop protein-coding  
neural prec protein-coding  
F-box prote protein-coding  
anthrax tox protein-coding  
sterile alph protein-coding  
CD9 antige protein-coding  
sterile alph protein-coding  
Meis home protein-coding  
transcobal; protein-coding  
leucine rich protein-coding  
RAB7, men protein-coding  
trinucleotic protein-coding  
glycophorin protein-coding  
protein ph; protein-coding  
phospholip protein-coding  
tetratricop protein-coding  
microtubul protein-coding  
tRNA aspar protein-coding  
olfactory r; protein-coding  
Rap guanin protein-coding

arachidona protein-coding  
M-phase s $\gamma$  protein-coding  
diacylglyce protein-coding  
acyl-CoA s $\gamma$  protein-coding  
cellular nuc protein-coding  
6-phospho $\gamma$  protein-coding  
NADH dehy protein-coding  
interferon- protein-coding  
contactin 5 protein-coding  
neural prec protein-coding  
ring finger protein-coding  
WD repeat protein-coding  
SMT3 supp protein-coding  
G protein-c protein-coding  
KDM3B lysi protein-coding  
DDB1 and ( protein-coding  
midnolin protein-coding  
A kinase (P protein-coding  
poly(rC) bir protein-coding  
PTK2 prote protein-coding  
transient r $\epsilon$  protein-coding  
TBC1 dom $\alpha$  protein-coding  
cadherin, E protein-coding  
phospholip protein-coding  
protein tyr $\gamma$  protein-coding  
solute carri protein-coding  
RIKEN cDN. protein-coding  
SprT-like N protein-coding  
family with protein-coding  
5-hydroxyt protein-coding  
ubiquitin f $\gamma$  protein-coding  
ADP-ribosy protein-coding  
ubiquitin a: protein-coding  
DiGeorge s protein-coding  
mitochond protein-coding  
interferon protein-coding  
anoctamin protein-coding  
UDP-Gal:b $\epsilon$  protein-coding  
SET domair protein-coding  
glutaredox protein-coding  
cellular nuc protein-coding  
Kruppel-lik protein-coding  
aarF domai protein-coding  
trinucleotic protein-coding  
PHD finger protein-coding  
Rap1 inter $\epsilon$  protein-coding  
F11 recept $\gamma$  protein-coding

ecto-NOX c protein-coding  
NIMA (nev protein-coding  
transmemk protein-coding  
HERPUD fa protein-coding  
ribosomal j protein-coding  
ets variant protein-coding  
phosphatic protein-coding  
ubiquitin-c protein-coding  
RNA bindin protein-coding  
trafficking j protein-coding  
tyrosine 3-i protein-coding  
USP6 N-ter protein-coding  
methyltran protein-coding  
Rho GTPas<sub>i</sub> protein-coding  
arsA arseni protein-coding  
testis expr<sub>e</sub> protein-coding  
ATPase, Na protein-coding  
Ewing tum<sub>i</sub> protein-coding  
transmemk protein-coding  
solute carri protein-coding  
HtrA serine protein-coding  
purine rich protein-coding  
DnaJ (Hsp4 protein-coding  
integrin al<sub>c</sub> protein-coding  
general tra protein-coding  
suppressor protein-coding  
histone de<sub>i</sub> protein-coding  
angiotensir protein-coding  
ras respon<sub>s</sub> protein-coding  
ADP-ribosy protein-coding  
DEAD/H (A protein-coding  
Sec24 relat protein-coding  
neurotensi protein-coding  
zinc finger, protein-coding  
N(alpha)-a<sub>c</sub> protein-coding  
NHP2 ribor protein-coding  
RIKEN cDN. protein-coding  
receptor (c protein-coding  
lysophosph<sub>r</sub> protein-coding  
arrestin, be protein-coding  
family with protein-coding  
polymerase<sub>e</sub> protein-coding  
heparin-bir protein-coding  
transformii protein-coding  
RIKEN cDN. protein-coding  
yrdC doma protein-coding  
pseudouric protein-coding

expressed : protein-coding  
interleukin protein-coding  
lymphocyte protein-coding  
F-box and \ protein-coding  
dynein, axc protein-coding  
RIKEN cDN. protein-coding  
insulin-like protein-coding  
thymus cel protein-coding  
contactin 6 protein-coding  
signal trans protein-coding  
ubiquinol-c protein-coding  
coiled-coil protein-coding  
mutL homc protein-coding  
target of m protein-coding  
TOPBP1-int protein-coding  
zinc finger protein-coding  
LIM domain protein-coding  
WD repeat protein-coding  
neuralized protein-coding  
ubiquitin-c protein-coding  
phosphoin protein-coding  
Ras associa protein-coding  
glutathione protein-coding  
cell divisor protein-coding  
myotubula protein-coding  
peroxisom protein-coding  
heterogen protein-coding  
WD repeat protein-coding  
mitochond protein-coding  
TBC1 dom protein-coding  
tumor-assc protein-coding  
REST corep protein-coding  
DMRT-like protein-coding  
ribosomal protein-coding  
retinol deh protein-coding  
death effec protein-coding  
splicing fac protein-coding  
WW domain protein-coding  
interleukin protein-coding  
melanoreg protein-coding  
inositol pol protein-coding  
muscleblin protein-coding  
cactin, spli protein-coding  
solute carri protein-coding  
zinc finger protein-coding  
canopy 1 h protein-coding  
TSC22 dom protein-coding

zinc finger, protein-coding  
cytochrom, protein-coding  
5'-nucleoti, protein-coding  
centrin 3, protein-coding  
Harvey rat, protein-coding  
REX2, RNA, protein-coding  
1-acylglyce, protein-coding  
PDS5, regu, protein-coding  
shugoshin-, protein-coding  
growth arr, protein-coding  
single-strar, protein-coding  
zinc finger, protein-coding  
PRP19/PSC, protein-coding  
peptidylgly, protein-coding  
tumor necr, protein-coding  
junctophilin, protein-coding  
carbohydrã, protein-coding  
adrenergic, protein-coding  
early growl, protein-coding  
muscleblin, protein-coding  
cytochrom, protein-coding  
tenascin C, protein-coding  
protein kin, protein-coding  
pseudouric, protein-coding  
RIKEN cDN., protein-coding  
tripartite r, protein-coding  
phosphoty, protein-coding  
docking pr, protein-coding  
mortality f, protein-coding  
THAP dom, protein-coding  
trans-actin, protein-coding  
antigen ide, protein-coding  
DEAD (Asp, protein-coding  
nucleobind, protein-coding  
cDNA sequ, protein-coding  
islet cell au, protein-coding  
jagunal hor, protein-coding  
B cell leuke, protein-coding  
protein kin, protein-coding  
valosin con, protein-coding  
ring finger, protein-coding  
scaffold att, protein-coding  
RIKEN cDN., protein-coding  
coagulator, protein-coding  
ras homolc, protein-coding  
period circ, protein-coding  
fucose-1-pl, protein-coding

polycomb  $\xi$  protein-coding  
inhibin bet. protein-coding  
tripartite n protein-coding  
solute carri protein-coding  
F-box prot $\epsilon$  protein-coding  
SR-related protein-coding  
free fatty a protein-coding  
myocardial protein-coding  
RNA bindin protein-coding  
lipopolysac protein-coding  
Fc receptor protein-coding  
breast can $\epsilon$  protein-coding  
ELAV (emb protein-coding  
resistance i protein-coding  
INO80 hor $\epsilon$  protein-coding  
EGF-like dc protein-coding  
adenylate l protein-coding  
Kruppel-lik protein-coding  
leucine rich protein-coding  
sorting nex protein-coding  
ATPase, cla protein-coding  
protein ph $\epsilon$  protein-coding  
hypoxia inc protein-coding  
kinase sup $\epsilon$  protein-coding  
ATPase, cla protein-coding  
Bardet-Bier protein-coding  
CAS1 dom $\alpha$  protein-coding  
ribosomal j protein-coding  
componen $\epsilon$  protein-coding  
Rho-associ $\epsilon$  protein-coding  
NADH dehy $\epsilon$  protein-coding  
bromodom protein-coding  
X-linked m $\epsilon$  protein-coding  
RIKEN cDN. protein-coding  
N-myc dow protein-coding  
sarcoglycar protein-coding  
serine/thre protein-coding  
calcitonin r protein-coding  
regulator o protein-coding  
cullin 3 protein-coding  
nucleopori protein-coding  
DEAD (Asp. protein-coding  
hydroxyste protein-coding  
DEAD (Asp. protein-coding  
pleckstrin l protein-coding  
zinc finger protein-coding  
zinc finger protein-coding

leucine-rich protein-coding  
karyopherin protein-coding  
seryl-aminase protein-coding  
G protein-coupled protein-coding  
phosphatidyl protein-coding  
immediate protein-coding  
cytochrome protein-coding  
protein kinase protein-coding  
TNFAIP3 protein-coding  
regulator of protein-coding  
glomulin, F protein-coding  
ATPase, H+ protein-coding  
Rho GTPase protein-coding  
Vpr (HIV-1) protein-coding  
WD repeat protein-coding  
phosphatidyl protein-coding  
tetraspanin protein-coding  
chromobacter protein-coding  
pecanex-like protein-coding  
cytoskeletal protein-coding  
2-phospho protein-coding  
ribosomal protein-coding  
neuron navigation protein-coding  
immunity-related protein-coding  
adenylate kinase protein-coding  
DNA segment protein-coding  
serine (or cysteine) protein-coding  
sphingosin protein-coding  
twist basic protein-coding  
zinc finger, protein-coding  
zinc finger protein-coding  
runt related protein-coding  
transmembrane protein-coding  
kelch repeat protein-coding  
TBK1 binding protein-coding  
discoidin domain protein-coding  
phosphoprotein protein-coding  
lamin B receptor protein-coding  
RAD1 homolog protein-coding  
prostaglandin protein-coding  
kinesin family protein-coding  
cleavage activation protein-coding  
dedicator of protein-coding  
nudix (nucleoside) protein-coding  
regulator of protein-coding  
CAS1 domain protein-coding  
RRN3 RNA protein-coding



ring finger protein-coding  
R-spondin 1 protein-coding  
septin 2 protein-coding  
dachshund protein-coding  
serine (or c) protein-coding  
negative regulator protein-coding  
integrator 1 protein-coding  
U2 small nuclear ribonucleoprotein protein-coding  
NADH dehydrogenase (ubiquinone) protein-coding  
VPS9 domain protein-coding  
solute carrier protein-coding  
nuclear receptor protein-coding  
translocase protein-coding  
solute carrier protein-coding  
ring finger protein-coding  
suppressor protein-coding  
LIM domain protein-coding  
stromal and mesenchymal protein-coding  
USO1 vesicle trafficking protein-coding  
cyclin-dependent kinase 1 protein-coding  
Max protein-coding  
mitochondrial protein-coding  
cap methylase protein-coding  
flavin-containing monooxygenase protein-coding  
dedicator of cytokinesis 1 protein-coding  
short chain alcohol dehydrogenase protein-coding  
progesterone receptor protein-coding  
transcription factor protein-coding  
Aly/REF exon protein-coding  
pore forming protein-coding  
TSSK6 activator protein-coding  
Friend leukemia protein-coding  
adaptor-receptor protein-coding  
transmembrane protein-coding  
sperm associated protein-coding  
ARP2 actin-binding protein-coding  
capping protein protein-coding  
non-catalytic protein-coding  
protein arginase protein-coding  
katanin p61 protein-coding  
spectrin repeat protein-coding  
dehydrogenase protein-coding  
ubiquitin C protein-coding  
MYST/Esa1 protein-coding  
deleted in lipodystrophy protein-coding  
galactosyltransferase protein-coding  
DNA-damage protein-coding

WD repeat protein-coding  
ADAMTS-lil protein-coding  
tumor necr protein-coding  
zinc finger protein-coding  
poly (ADP-ribose) polymerase 1 protein-coding  
neuroguidin protein-coding  
nuclear receptor corepressor protein-coding  
family with sequence similarity 100 protein-coding  
PRP40 pre-mRNA processing protein-coding  
torsin family protein-coding  
deoxycytidylase protein-coding  
ring finger protein-coding  
diacylglycerol kinase protein-coding  
aconitase 1 protein-coding  
carbohydrate sulfotransferase 1 protein-coding  
RIKEN cDNA 105301 protein-coding  
carbohydrate sulfotransferase 1 protein-coding  
multiple C2 domain protein-coding  
small nuclear ribonucleoprotein A2 protein-coding  
vav 1 oncogene protein-coding  
F-box protein 1 protein-coding  
major facilitator superfamily domain-containing protein 1 protein-coding  
CASP8 and associated protein 2 protein-coding  
somatostatin receptor 2 protein-coding  
DNA-damage-inducible transcript 4 protein-coding  
Krüppel-like factor 10 protein-coding  
heat shock protein 70 protein-coding  
destrin protein-coding  
dpy-19-like protein-coding  
potassium channel protein-coding  
protein phosphatase 1 protein-coding  
F11 receptor protein-coding  
purinergic receptor P2Y11 protein-coding  
ubiquitin-specific protease 1 protein-coding  
CD86 antigen protein-coding  
leucine-rich repeat-containing protein 1 protein-coding  
CCR4-NOT complex subunit 1 protein-coding  
sulfotransferase 1 protein-coding  
ELOVL family class 1 protein-coding  
jumonji, AT domain-containing protein 1 protein-coding  
calmodulin-binding transcription activator 1 protein-coding  
RNA polymerase II protein-coding  
hepatoma-associated protein 1 protein-coding  
protein tyrosine phosphatase 1 protein-coding  
unc-13 homolog protein-coding  
zinc finger protein-coding  
potassium channel protein-coding

protein ph protein-coding  
zinc finger, protein-coding  
WD repeat protein-coding  
Rho guanin protein-coding  
nuclear prc protein-coding  
centrosom. protein-coding  
interleukin protein-coding  
solute carri protein-coding  
recombina protein-coding  
homeodon protein-coding  
acyl-Coenz protein-coding  
general tra protein-coding  
contactin a protein-coding  
golgi autoa protein-coding  
family with protein-coding  
homeodon protein-coding  
solute carri protein-coding  
D site albu protein-coding  
meteorin,  $\xi$  protein-coding  
glutathione  $\epsilon$  protein-coding  
stomatin (E protein-coding  
PCI domair protein-coding  
solute carri protein-coding  
ataxin 7-lik protein-coding  
suppressor protein-coding  
rcd1 (requi protein-coding  
N-myc dow protein-coding  
G protein-c protein-coding  
placenta e $\nu$  protein-coding  
cyclin-depe protein-coding  
S-adenosyl protein-coding  
estrogen-r $\alpha$  protein-coding  
family with protein-coding  
fatty acyl C protein-coding  
RUN and F $\beta$  protein-coding  
solute carri protein-coding  
ELKS/RAB6 protein-coding  
MMS19 (M protein-coding  
SAM and Sl protein-coding  
Nipped-B h protein-coding  
thyroid stir protein-coding  
protein kin protein-coding  
Ctr9, Paf1/ protein-coding  
ATP-bindin protein-coding  
tubulin pol protein-coding  
ATPase, Ca protein-coding  
ankyrin re $\beta$  protein-coding

Smg-7 hom protein-coding  
EMG1 nucl protein-coding  
H2A histon protein-coding  
syndecan b protein-coding  
P450 (cyto protein-coding  
pyroglutar protein-coding  
sine oculis- protein-coding  
ATP syntha protein-coding  
NADH dehy protein-coding  
latent tran: protein-coding  
cordon-ble protein-coding  
Sfi1 homol protein-coding  
c-abl onco protein-coding  
glycine rec protein-coding  
TAP bindin protein-coding  
chemokine protein-coding  
discs, large protein-coding  
centriolin protein-coding  
potassium protein-coding  
lectin, man protein-coding  
TBC1 dom protein-coding  
ATP syntha protein-coding  
G protein-c protein-coding  
sterol O-ac protein-coding  
lin-9 homo protein-coding  
sphingosin protein-coding  
cyclin M2 protein-coding  
HSPA (heat protein-coding  
perilipin 3 protein-coding  
fatty acid b protein-coding  
zinc finger protein-coding  
solute carri protein-coding  
trichohyalin protein-coding  
adiponectin protein-coding  
spermatog protein-coding  
nucleolar a protein-coding  
compleme protein-coding  
ATP syntha protein-coding  
regulatory protein-coding  
thioredoxin protein-coding  
transducin protein-coding  
myosin, lig protein-coding  
pleckstrin epsilon protein-coding  
zinc finger protein-coding  
componen protein-coding  
5'-3' exorib protein-coding  
receptor (T protein-coding

aquaporin protein-coding  
gasdermin protein-coding  
membrane protein-coding  
tyrosine 3- $\beta$  protein-coding  
dehydroge protein-coding  
alkB, alkylA protein-coding  
death asso protein-coding  
Ral GEF wit protein-coding  
heat shock protein-coding  
RAS-relate protein-coding  
TBC1 doma protein-coding  
solute carri protein-coding  
lysophosph protein-coding  
TNF recept protein-coding  
glycyl-tRNA<sup>f</sup> protein-coding  
integral me protein-coding  
pleckstrin 1 protein-coding  
cytidine 5'- protein-coding  
PDX1 C-ter protein-coding  
zinc finger, protein-coding  
interleukin protein-coding  
palmitoyl- $\beta$  protein-coding  
interferon protein-coding  
tribbles ho protein-coding  
homeobox protein-coding  
disabled 2 protein-coding  
syntaphilin protein-coding  
chemokine protein-coding  
protein tyr protein-coding  
fatty acyl C protein-coding  
zinc finger protein-coding  
zinc finger protein-coding  
methyl-CpG protein-coding  
SYS1 Golgi- protein-coding  
ELOVL fam protein-coding  
rhotekin protein-coding  
low density protein-coding  
transmemt protein-coding  
TRAF type 1 protein-coding  
repulsive g protein-coding  
glutaminas protein-coding  
CD47 antig protein-coding  
activating t protein-coding  
FK506 bind protein-coding  
PHD finger protein-coding  
DEAD (Asp) protein-coding  
ras homolc protein-coding

ribosomal | protein-coding  
lamin B rec protein-coding  
glycophorii protein-coding  
G patch do protein-coding  
orosomucc protein-coding  
RIKEN cDN. protein-coding  
lysine (K)-s protein-coding  
family with protein-coding  
glutamate- protein-coding  
RIKEN cDN. protein-coding  
tyrosine 3-i protein-coding  
methyltran protein-coding  
mannosida protein-coding  
abhydrolas protein-coding  
sciellin protein-coding  
ring finger protein-coding  
sulfatase 2 protein-coding  
AT rich inte protein-coding  
anoctamin protein-coding  
RAR-relate protein-coding  
ELOVL fam protein-coding  
jumping tra protein-coding  
RELT tumo protein-coding  
syntrophin protein-coding  
cyclin-depe protein-coding  
vacuolar pr protein-coding  
RRS1 ribos protein-coding  
Parkinson c protein-coding  
RIKEN cDN. protein-coding  
lipocalin 4 protein-coding  
vav 3 onco protein-coding  
oncostatin protein-coding  
Yip1 domai protein-coding  
mitochond protein-coding  
retinoblast protein-coding  
transmemk protein-coding  
zyg-II famil protein-coding  
syntaxin bi protein-coding  
kelch-like 7 protein-coding  
Rho family protein-coding  
unc-5 hom protein-coding  
a disintegri protein-coding  
WAS/WASl protein-coding  
torsin A int protein-coding  
proteasom protein-coding  
YKT6 homc protein-coding  
toll-like rec protein-coding

RFad1, flav protein-coding  
forkhead b protein-coding  
trafficking | protein-coding  
receptor ac protein-coding  
phosphogl protein-coding  
MTOR asso protein-coding  
ATP-bindin protein-coding  
potassium protein-coding  
transducin protein-coding  
OTU domai protein-coding  
ARP3 actin protein-coding  
formin-like protein-coding  
G elongatic protein-coding  
transferrin protein-coding  
LIM domai protein-coding  
F-box prote protein-coding  
tec protein protein-coding  
lemur tyro: protein-coding  
thymus cel protein-coding  
jagged 1 protein-coding  
timeless in: protein-coding  
lymphocyte protein-coding  
vascular en protein-coding  
son of seve protein-coding  
zinc finger protein-coding  
calpain 13 protein-coding  
phosphata: protein-coding  
Kruppel-lik protein-coding  
ligand of n: protein-coding  
URI1, prefc protein-coding  
succinate d protein-coding  
histone de: protein-coding  
serine (or c protein-coding  
kinase inse protein-coding  
family with protein-coding  
interaction protein-coding  
BEN domai protein-coding  
TBC1 domæ protein-coding  
sterol regu protein-coding  
solute carri protein-coding  
FYVE, RhoG protein-coding  
lectin, man protein-coding  
activation-i protein-coding  
APC memb protein-coding  
striatin, cal protein-coding  
peptidyl pr protein-coding  
RIKEN cDN. protein-coding

UDP-GlcNAc protein-coding  
transmembrane protein-coding  
methylmalonate protein-coding  
adiponectin protein-coding  
HECT domain protein-coding  
ribulose-5-phosphate protein-coding  
ribosomal protein-coding  
BCL2-associated protein-coding  
cut-like homeobox protein-coding  
heterogeneous protein-coding  
forkhead box protein-coding  
negative regulator protein-coding  
translin protein-coding  
D-2-hydroxy protein-coding  
prominin 1 protein-coding  
guanine nucleotide protein-coding  
erythrocyte protein-coding  
zinc finger protein-coding  
xyloside xylose protein-coding  
utrophin protein-coding  
BCL2-like 1 protein-coding  
tripartite repeat protein-coding  
solute carrier protein-coding  
lysozyme 1 protein-coding  
membrane protein-coding  
RIKEN cDNA protein-coding  
UDP-glucose protein-coding  
mitochondrial protein-coding  
prothymosin protein-coding  
ARP1 actin protein-coding  
fatty acid binding protein-coding  
carbohydrate protein-coding  
FBX osteocalcin protein-coding  
general transcription factor protein-coding  
serine/threonine protein-coding  
peptidylprolyl isomerase protein-coding  
nitric oxide protein-coding  
calpain 10 protein-coding  
dpy-30 homeobox protein-coding  
G protein-coupled protein-coding  
sorting nexin protein-coding  
BTAF1 RNA protein-coding  
family with protein-coding  
zinc finger protein-coding  
cyclic nucleotide protein-coding  
BH3 interacting protein-coding  
proline-rich protein-coding



HOP home protein-coding  
PDZ domai protein-coding  
SH2B adap protein-coding  
leucine rich protein-coding  
T cell activ protein-coding  
heterogen protein-coding  
centrosom protein-coding  
chemokine protein-coding  
F-box and I protein-coding  
mitochond protein-coding  
ARP3 actin protein-coding  
Holliday jui protein-coding  
RIKEN cDN protein-coding  
transportin protein-coding  
ring finger protein-coding  
Friend leuk protein-coding  
interferon protein-coding  
meningioma protein-coding  
sphingosin protein-coding  
expressed : protein-coding  
solute carri protein-coding  
lipin 1 protein-coding  
myosin reg protein-coding  
neuromedi protein-coding  
spire homc protein-coding  
FK506 bind protein-coding  
RIKEN cDN protein-coding  
RIKEN cDN protein-coding  
transmemk protein-coding  
CART prepi protein-coding  
zinc finger protein-coding  
tripartite r protein-coding  
chondroad protein-coding  
cornichon I protein-coding  
chromatin protein-coding  
translocase protein-coding  
RNA bindin protein-coding  
methyltran protein-coding  
muscleblin protein-coding  
cysteine co protein-coding  
family with protein-coding  
zinc finger protein-coding  
Sp110 nucl protein-coding  
Sh3kbp1 bi protein-coding  
vacuolar pr protein-coding  
NIMA (nev protein-coding  
Kruppel-lik protein-coding

PHD finger protein-coding  
translation protein-coding  
serine/argi protein-coding  
AU RNA bir protein-coding  
Rho guanin protein-coding  
3-phospho; protein-coding  
origin reco; protein-coding  
cullin 2 protein-coding  
ubiquitin-c protein-coding  
DNA-dama protein-coding  
ubiquitin C protein-coding  
sphingomy protein-coding  
glucose-fru protein-coding  
ADP-ribosy protein-coding  
family with protein-coding  
ring finger protein-coding  
myotrophii protein-coding  
solute carri protein-coding  
cullin assoc protein-coding  
leucine rict protein-coding  
RAB3C, me protein-coding  
trinucleotic protein-coding  
PDZ domai protein-coding  
vesicle-ass; protein-coding  
kelch-like 2 protein-coding  
mitogen-ac protein-coding  
lysophosph; protein-coding  
neuregulin protein-coding  
solute carri protein-coding  
autocrine r protein-coding  
RAS-relate; protein-coding  
anillin, acti protein-coding  
formin 1 protein-coding  
prune hom protein-coding  
breast can; protein-coding  
baculoviral protein-coding  
EH-domain protein-coding  
cleavage ar protein-coding  
tRNA-yW s; protein-coding  
notch 2 protein-coding  
germinal c; protein-coding  
biotinidase protein-coding  
SLIT-ROBO protein-coding  
KDEL (Lys-/ protein-coding  
dipeptidyl; protein-coding  
family with protein-coding  
sema dom; protein-coding

striatin, cal protein-coding  
coiled-coil protein-coding  
enolase 1B protein-coding  
ubiquilin 1 protein-coding  
ankyrin repeat protein-coding  
ryanodine receptor protein-coding  
centrosomal protein-coding  
male-specific protein-coding  
solute carrier protein-coding  
methylthio protein-coding  
ArfGAP with protein-coding  
nuclear receptor protein-coding  
ilvB (bacterial protein-coding  
family with protein-coding  
ATP-binding protein-coding  
biotinidase protein-coding  
eukaryotic protein-coding  
RIKEN cDNA protein-coding  
WD repeat protein-coding  
RIKEN cDNA protein-coding  
ArfGAP with protein-coding  
proline-rich protein-coding  
annexin A9 protein-coding  
glutamate protein-coding  
p21 protein-coding  
WD repeat protein-coding  
NOL1/NOP protein-coding  
Coenzyme protein-coding  
RIKEN cDNA protein-coding  
kelch domain protein-coding  
nuclear receptor protein-coding  
single-strand protein-coding  
ring finger protein-coding  
crystallin, gamma protein-coding  
inhibitor of protein-coding  
RIKEN cDNA protein-coding  
mitochondrial protein-coding  
Fc receptor protein-coding  
glutamate protein-coding  
multiple EC protein-coding  
COP9 (conserved protein-coding  
PAXIP1 associated protein-coding  
histone deacetylase protein-coding  
ArfGAP with protein-coding  
F-box and protein-coding  
1-acylglycerol protein-coding  
solute carrier protein-coding

tRNA splici protein-coding  
family with protein-coding  
family with protein-coding  
diazepam k protein-coding  
peroxisomε protein-coding  
tRNA selen protein-coding  
Rho guanin protein-coding  
NIMA (nev protein-coding  
RasGEF doi protein-coding  
FAST kinasi protein-coding  
F-box proteε protein-coding  
multivesicl protein-coding  
wings apar protein-coding  
mitochond protein-coding  
cyclin-depeε protein-coding  
myocyte er protein-coding  
3-ketodihy protein-coding  
DTW doma protein-coding  
cyclin O protein-coding  
optineurin protein-coding  
endoglin protein-coding  
solute carri protein-coding  
arylsulfataε protein-coding  
signal sequ protein-coding  
caspase 7 protein-coding  
mitochond protein-coding  
cylicin, bas protein-coding  
leucine rich protein-coding  
cell divisor protein-coding  
coiled-coil protein-coding  
aspartyl-tR protein-coding  
phosphose protein-coding  
sprouty ho protein-coding  
PARK2 co-r protein-coding  
ring finger protein-coding  
hyaluronar protein-coding  
methionineε protein-coding  
ring finger protein-coding  
histone clu protein-coding  
activating t protein-coding  
vascular en protein-coding  
nucleopori protein-coding  
programmε protein-coding  
branched c protein-coding  
ribosomal j protein-coding  
tripartite r protein-coding  
poly (A) po protein-coding

double hor protein-coding  
RING1 and protein-coding  
H1 histone protein-coding  
growth fac: protein-coding  
presenilin 2 protein-coding  
microsoma protein-coding  
pleckstrin 1 protein-coding  
ring finger protein-coding  
ankyrin repeat protein-coding  
solute carrier protein-coding  
SAFB-like, type 1 protein-coding  
abhydrolase protein-coding  
zinc finger protein-coding  
basic leucine protein-coding  
cell cycle associated protein-coding  
proteasome protein-coding  
F-box and WD40 protein-coding  
resistin protein-coding  
Kruppel-like protein-coding  
transcription protein-coding  
leukotriene protein-coding  
cell division protein-coding  
family with protein-coding  
TBC1 domain protein-coding  
SIK family kinase protein-coding  
heterogeneous protein-coding  
zinc finger protein-coding  
doublecortin protein-coding  
solute carrier protein-coding  
phosphorylation protein-coding  
IQ motif containing protein-coding  
muscleblind protein-coding  
Rho-associated protein-coding  
Y box protein-coding  
laminin, beta protein-coding  
exocyst core protein-coding  
family with protein-coding  
KAT8 regulator protein-coding  
CCAAT/enhancer protein-coding  
primase associated protein-coding  
ras homolog protein-coding  
family with protein-coding  
antizyme inhibitor protein-coding  
carnitine domain protein-coding  
INTS3 and 4 protein-coding  
polyhomeobox protein-coding  
galactosyl protein-coding

LFNG O-fuc protein-coding  
ubiquitin-c protein-coding  
haloacid de protein-coding  
zinc finger protein-coding  
nitric oxide protein-coding  
sorting nex protein-coding  
fibronectin protein-coding  
ring finger protein-coding  
phosphatid protein-coding  
solute carri protein-coding  
COP9 (cons protein-coding  
acylpeptide protein-coding  
heat shock protein-coding  
leucine rich protein-coding  
REM2 and protein-coding  
leukocyte s protein-coding  
histone clu protein-coding  
serine/thre protein-coding  
transmemk protein-coding  
DNA prima protein-coding  
chitinase d protein-coding  
FYN bindin protein-coding  
GTP bindin protein-coding  
migration ε protein-coding  
dystrophia protein-coding  
glucosamin protein-coding  
methyltran protein-coding  
ubiquitin-c protein-coding  
RIKEN cDN. protein-coding  
DCP1 deca protein-coding  
attractin protein-coding  
predicted ξ protein-coding  
NIMA (nev protein-coding  
COP9 (cons protein-coding  
protease-a protein-coding  
sodium chε protein-coding  
NEDD4 bin protein-coding  
signal trans protein-coding  
replication protein-coding  
TRAF-inter protein-coding  
phosphatid protein-coding  
nuclear fra protein-coding  
prolyl 4-hy protein-coding  
basic trans protein-coding  
prion prote protein-coding  
AT rich inte protein-coding  
charged mi protein-coding

bromodom protein-coding  
tripartite r protein-coding  
pantothen; protein-coding  
Sp2 transcr protein-coding  
transmemk protein-coding  
GA repeat l protein-coding  
cysteine an protein-coding  
RNA bindin protein-coding  
SKI-like protein-coding  
chromodor protein-coding  
retinol deh protein-coding  
v-myc mye protein-coding  
cyclin D bir protein-coding  
family with protein-coding  
transmemk protein-coding  
mitochond protein-coding  
superoxide protein-coding  
mast cell in protein-coding  
low density protein-coding  
zinc finger, protein-coding  
ubiquitin s; protein-coding  
Casitas B-li protein-coding  
leucine zip; protein-coding  
ets variant protein-coding  
CCR4-NOT protein-coding  
protein tyr; protein-coding  
ubiquitin d protein-coding  
nitrilase fai protein-coding  
RCSD dom; protein-coding  
SMAD fami protein-coding  
solute carri protein-coding  
c-src tyrosi protein-coding  
queuine tR protein-coding  
predicted g protein-coding  
adhesion n protein-coding  
kelch dom; protein-coding  
major facili protein-coding  
interactor ( protein-coding  
protein kin protein-coding  
CD97 antig protein-coding  
solute carri protein-coding  
inhibitor of protein-coding  
trinucleotic protein-coding  
solute carri protein-coding  
guanylate l protein-coding  
pleckstrin l protein-coding  
RIKEN cDN. protein-coding

CCR4 carbc protein-coding  
transcriptic protein-coding  
small nucle protein-coding  
myeloma o protein-coding  
SDA1 domꞑ protein-coding  
mannosida protein-coding  
casein kina protein-coding  
glutaredox protein-coding  
anaphase ꞑ protein-coding  
furin (paire protein-coding  
neuropilin ꞑ protein-coding  
SMAD fami protein-coding  
ADP-ribosy protein-coding  
maturin, nꞑ protein-coding  
coiled-coil ꞑ protein-coding  
vacuolar pr protein-coding  
mitogen-ac protein-coding  
protein ger protein-coding  
coiled-coil ꞑ protein-coding  
calmodulin protein-coding  
androglobi protein-coding  
calcyclin bi protein-coding  
Scm-like wi protein-coding  
calcium/ca protein-coding  
monoglyce protein-coding  
olfactory rꞑ protein-coding  
eukaryotic ꞑ protein-coding  
mitochond protein-coding  
C-type lecti protein-coding  
AT rich inte protein-coding  
hydroxyste protein-coding  
annexin A3 protein-coding  
tumor necr protein-coding  
fuzzy homc protein-coding  
integrator ꞑ protein-coding  
phosphatid protein-coding  
bone morp protein-coding  
ring finger ꞑ protein-coding  
LYR motif c protein-coding  
cholinergic protein-coding  
protein phꞑ protein-coding  
suppressor protein-coding  
farnesyl diꞑ protein-coding  
synemin, ir protein-coding  
zinc finger ꞑ protein-coding  
RuvB-like p protein-coding  
isocitrate d protein-coding



Morf4 fami protein-coding  
phosphorit protein-coding  
gap junctio protein-coding  
cyclin-depe protein-coding  
Ras associa protein-coding  
glutamate protein-coding  
CKLF-like N protein-coding  
diphosphoi protein-coding  
survival mc protein-coding  
cysteinyl le protein-coding  
ribonuclea: protein-coding  
transducer protein-coding  
sorting nex protein-coding  
PAK1 inter: protein-coding  
transcriptic protein-coding  
zinc finger protein-coding  
G protein-c protein-coding  
growth arr: protein-coding  
fibronectin protein-coding  
zinc finger, protein-coding  
receptor ac protein-coding  
feline sarcc protein-coding  
lipase, end: protein-coding  
butyrophili protein-coding  
F-box and I protein-coding  
prostaglan: protein-coding  
RIMS bindi protein-coding  
plectin protein-coding  
DDHD dom protein-coding  
phosphatic protein-coding  
transmemk protein-coding  
nucleic acic protein-coding  
zinc finger protein-coding  
regulatory protein-coding  
ribosomal j protein-coding  
X-prolyl an protein-coding  
solute carri protein-coding  
ribosomal j protein-coding  
phosphata: protein-coding  
F-box prote protein-coding  
sortilin-rel: protein-coding  
myeloblast protein-coding  
eukaryotic protein-coding  
opioid grov protein-coding  
DIRAS fami protein-coding  
phosphofru protein-coding  
cadherin 2l protein-coding

ubiquitin s1 protein-coding  
ubiquinol c protein-coding  
neurexoph protein-coding  
delta/notch1 protein-coding  
coiled-coil 1 protein-coding  
MORN repeat protein-coding  
Abelson helix protein-coding  
cytochrome protein-coding  
NHL repeat protein-coding  
vesicle-associated protein-coding  
GA repeat 1 protein-coding  
topoisomerase protein-coding  
TRAF3 interactor protein-coding  
solute carrier protein-coding  
lectin, galactose protein-coding  
tubby cand protein-coding  
vacuolar protein-coding  
solute carrier protein-coding  
COX assembly protein-coding  
leucine-rich protein-coding  
centrosome protein-coding  
5'-nucleotide protein-coding  
zinc finger, protein-coding  
DEAD (Asp) protein-coding  
prostaglandin protein-coding  
transmembrane protein-coding  
serine (or cysteine) protein-coding  
proteasome protein-coding  
mitochondrial protein-coding  
signal-inducible protein-coding  
adenosine protein-coding  
ribonucleic acid protein-coding  
killer cell lectin protein-coding  
stem-loop protein-coding  
COMM domain protein-coding  
glutathione protein-coding  
cadherin 6 protein-coding  
ubiquitin s1 protein-coding  
coactosin-1 protein-coding  
cyclin-dependent protein-coding  
RIKEN cDNA protein-coding  
La ribonucleic acid protein-coding  
sphingosine protein-coding  
ORAI calcium protein-coding  
RIKEN cDNA protein-coding  
Kv channel protein-coding  
epithelial n protein-coding

CD47 antig protein-coding  
toll-like rec protein-coding  
stanniocalc protein-coding  
ribosomal l protein-coding  
ARP6 actin protein-coding  
serine/thre protein-coding  
N(alpha)-a protein-coding  
cleavage ar protein-coding  
frizzled hor protein-coding  
neural cell protein-coding  
carboxype protein-coding  
golgi assoc protein-coding  
biogenesis protein-coding  
cysteinyl le protein-coding  
RAB27A, m protein-coding  
septin 14 protein-coding  
ring finger protein-coding  
two pore cl protein-coding  
DEAD (Asp protein-coding  
translocase protein-coding  
serine/thre protein-coding  
ankyrin re protein-coding  
syntaxin 12 protein-coding  
nuclear rec protein-coding  
casein kina protein-coding  
male-speci protein-coding  
digestive o protein-coding  
structural r protein-coding  
CASP8 and protein-coding  
family with protein-coding  
WW domai protein-coding  
melanoreg protein-coding  
Fanconi an protein-coding  
aarF domai protein-coding  
selenoprot protein-coding  
ribosomal l protein-coding  
Ssu72 RNA protein-coding  
kinesin far protein-coding  
RAB31, me protein-coding  
tetraspanir protein-coding  
excision re protein-coding  
RIKEN cDN. protein-coding  
signal pept protein-coding  
phosphoin protein-coding  
DDB1 and ( protein-coding  
fucosyltran protein-coding  
zinc finger protein-coding

speedy hor protein-coding  
RIKEN cDN. protein-coding  
matrix met protein-coding  
sorting nex protein-coding  
selenoprot protein-coding  
avian musc protein-coding  
zinc finger protein-coding  
E74-like fac protein-coding  
phosphoin protein-coding  
atrophin 1 protein-coding  
histocomp; protein-coding  
mitochond protein-coding  
kinesin far protein-coding  
patatin-like protein-coding  
microtubul protein-coding  
acyl-Coenz; protein-coding  
cadherin 1; protein-coding  
sema dom; protein-coding  
RecQ prote protein-coding  
family with protein-coding  
Rap1 GTPa protein-coding  
Sad1 and U protein-coding  
aldehyde d protein-coding  
Yamaguchi protein-coding  
RIKEN cDN. protein-coding  
ligand dep; protein-coding  
cysteine-se protein-coding  
MSS51 mit protein-coding  
catenin (ca protein-coding  
RCE1 homc protein-coding  
phosphata; protein-coding  
UDP-Gal:be protein-coding  
clavesin 1 protein-coding  
RAB20, me protein-coding  
carnitine p; protein-coding  
Rho guanin protein-coding  
La ribonucl protein-coding  
shisa homc protein-coding  
SKI family t protein-coding  
G-protein c protein-coding  
CDC14 cell protein-coding  
DEAD (Asp; protein-coding  
BCL2 bindir protein-coding  
euchromat protein-coding  
coiled-coil protein-coding  
DSN1, MIN protein-coding  
tyrosine 3-i protein-coding

RAD51 hon protein-coding  
thioesteras protein-coding  
tripartite r protein-coding  
transmemk protein-coding  
RAD17 hon protein-coding  
collagen, t<sub>1</sub> protein-coding  
mitochond protein-coding  
heterogenε protein-coding  
transducin protein-coding  
F-box and \ protein-coding  
thrombosp protein-coding  
Aly/REF ex<sub>1</sub> protein-coding  
lysosomal-; protein-coding  
insulin-like protein-coding  
KH-type sp protein-coding  
transforma protein-coding  
proviral int protein-coding  
glycerol kir protein-coding  
C2 calcium- protein-coding  
myelin pro<sub>1</sub> protein-coding  
olfactomec protein-coding  
matrix met protein-coding  
antigen ide protein-coding  
programmε protein-coding  
Vac14 hom protein-coding  
TGFB-induc protein-coding  
tight juncti protein-coding  
forkhead b protein-coding  
olfactory rε protein-coding  
Kruppel-lik protein-coding  
acid phosp protein-coding  
ring finger protein-coding  
ADP-ribose protein-coding  
cyclin-depe protein-coding  
tumor necr protein-coding  
CDC42 effe protein-coding  
SH2 domai protein-coding  
SH3-domai protein-coding  
deafness, a protein-coding  
SFT2 doma protein-coding  
patatin-like protein-coding  
grancalcin protein-coding  
transmemk protein-coding  
transformii protein-coding  
villin 1 protein-coding  
TM2 doma protein-coding  
TRAF famil protein-coding

Fc receptor protein-coding  
predicted  $\xi$  protein-coding  
zinc finger protein-coding  
solute carrier protein-coding  
plasminogen protein-coding  
collagen, type protein-coding  
thymopoietin protein-coding  
dehydrogenase protein-coding  
transmembrane protein-coding  
ubiquinol-coupling protein-coding  
dedicator of cytokinesis protein-coding  
lymphotoxin protein-coding  
bromodomain protein-coding  
neuroligin 1 protein-coding  
G protein-coupled protein-coding  
prolyl 4-hydroxylase protein-coding  
acetylcholinesterase protein-coding  
mitochondrial protein-coding  
solute carrier protein-coding  
glucosyltransferase protein-coding  
MAP/microtubule protein-coding  
ankyrin repeat protein-coding  
lipoyltransferase protein-coding  
PET112 homolog protein-coding  
SEH1-like (1) protein-coding  
elongator  $\epsilon$  protein-coding  
mitochondrial protein-coding  
proline aminopeptidase protein-coding  
glycoprotein protein-coding  
solute carrier protein-coding  
guanine nucleotide protein-coding  
tetramethyl protein-coding  
lymphoblast protein-coding  
FYVE, Rho GTPase protein-coding  
FBX osteocalcin protein-coding  
pleckstrin homolog protein-coding  
chimerin 2 protein-coding  
v-maf musculoaponeurotic protein-coding  
adhesion protein-coding  
sorting nexin protein-coding  
ectonucleoside protein-coding  
processing protein-coding  
fibulin 2 protein-coding  
stefin A3 protein-coding  
interleukin protein-coding  
chaperonin protein-coding  
protein phosphatase protein-coding

progesterone protein-coding  
WD repeat protein-coding  
diacylglycerol protein-coding  
adrenergic protein-coding  
glutathione protein-coding  
SEC22 vesicle protein-coding  
glyoxylate protein-coding  
molybdenum protein-coding  
spleen tyrosine protein-coding  
regulatory protein-coding  
RAD21 homolog protein-coding  
triosephosphate protein-coding  
methyltransferase protein-coding  
chromobox protein-coding  
mitogen-activated protein-coding  
MORN repeat protein-coding  
GDP-mannose protein-coding  
mitogen-activated protein-coding  
solute carrier protein-coding  
TAO kinase protein-coding  
RIKEN cDNA protein-coding  
prostaglandin protein-coding  
pre B cell leukemia protein-coding  
neutral sphingomyelinase protein-coding  
musculoskeletal protein-coding  
early growth protein-coding  
histone deacetylase protein-coding  
protein kinase protein-coding  
LSM12 homolog protein-coding  
RIKEN cDNA protein-coding  
zinc finger, protein-coding  
ubiquitin specific protein-coding  
granule cell protein-coding  
TATA box binding protein-coding  
ATPase, Calcium protein-coding  
inhibitor of protein-coding  
nucleolin protein-coding  
PAP associated protein-coding  
tumor necrosis protein-coding  
BMP2 inducible protein-coding  
katanin p61 protein-coding  
atlastin GT protein-coding  
cold shock protein-coding  
family with protein-coding  
GTPase activating protein-coding  
retinoic acid protein-coding  
zinc finger, protein-coding

branched c protein-coding  
RMI2, RecC protein-coding  
transformii protein-coding  
cornifelin protein-coding  
DIP2 disco- protein-coding  
deiodinase protein-coding  
neural prec protein-coding  
death indu protein-coding  
1-acylglyce protein-coding  
inositol (m protein-coding  
RIKEN cDN. protein-coding  
RAS-relate protein-coding  
phosphofu protein-coding  
polo-like ki protein-coding  
FCH domai protein-coding  
kelch-like 2 protein-coding  
zinc finger protein-coding  
Yamaguchi protein-coding  
protein-L-is protein-coding  
tektin 3 protein-coding  
nuclear tra protein-coding  
sterile alph protein-coding  
neutrophil protein-coding  
de-etiolate protein-coding  
Yae1 doma protein-coding  
protein ph protein-coding  
RIKEN cDN. protein-coding  
paired-Ig-li protein-coding  
transmemk protein-coding  
acyl-Coenz protein-coding  
anthrax to protein-coding  
SLIT and N protein-coding  
hypermeth protein-coding  
pre-mRNA protein-coding  
mesoderm protein-coding  
regulator o protein-coding  
cerebral ca protein-coding  
protein arg protein-coding  
carbonic ar protein-coding  
ATPase, Na protein-coding  
PML-RAR a protein-coding  
ubiquitin-li protein-coding  
RIKEN cDN. protein-coding  
ubiquitin-f protein-coding  
Max intera protein-coding  
nuclear ant protein-coding  
cytosolic th protein-coding



intersectin protein-coding  
glycerol kir protein-coding  
limb and n protein-coding  
glutamine 1 protein-coding  
leucine rich protein-coding  
nucleoporin protein-coding  
C-type lectin protein-coding  
ATPase, Cu protein-coding  
exocyst core protein-coding  
carbohydrate protein-coding  
N-acetylglucosamine protein-coding  
lysine (K)-rich protein-coding  
mitogen-activated protein-coding  
ATP-binding protein-coding  
WD repeat protein-coding  
ribonucleoprotein protein-coding  
lymphocyte protein-coding  
C-type lectin protein-coding  
transmembrane protein-coding  
Kruppel-like protein-coding  
predicted protein-coding  
5' nucleotidyl protein-coding  
ARP5 actin protein-coding  
neuron navigation protein-coding  
plexin B3 protein-coding  
importin 7 protein-coding  
transmembrane protein-coding  
nuclear factor protein-coding  
secretory component protein-coding  
DEAH (Asp) protein-coding  
lipoma HMG protein-coding  
HEAT repeat protein-coding  
peptidylprolyl protein-coding  
carbohydrate protein-coding  
ubiquitin signal protein-coding  
3'-phosphatase protein-coding  
CDC42 effector protein-coding  
Holliday junction protein-coding  
cAMP response protein-coding  
ring finger protein-coding  
AT hook, D protein-coding  
plasminogen protein-coding  
G1 to S phase protein-coding  
dual-specific protein-coding  
ATPase type protein-coding  
forkhead box protein-coding  
EH domain protein-coding

TNF recept protein-coding  
peroxisom; protein-coding  
zinc finger protein-coding  
succinate d protein-coding  
neutral chc protein-coding  
trans-actin; protein-coding  
dual-specif protein-coding  
RIKEN cDN. protein-coding  
serine (or c protein-coding  
NADH dehy protein-coding  
bone marr; protein-coding  
biogenesis protein-coding  
rosbin, rou protein-coding  
ankyrin re; protein-coding  
phosphodi; protein-coding  
RAN bindin protein-coding  
protogenin protein-coding  
fucosyltran protein-coding  
Rap guanin protein-coding  
YdjC homo protein-coding  
unc-79 hon protein-coding  
Janus kinas protein-coding  
zinc finger protein-coding  
platelet/en protein-coding  
chloride int protein-coding  
heterogen; protein-coding  
melanoma protein-coding  
ligase III, D protein-coding  
rosbin, rou protein-coding  
TAF3 RNA ; protein-coding  
N-myc (anc protein-coding  
zinc finger protein-coding  
serine/argi protein-coding  
G protein-c protein-coding  
solute carri protein-coding  
ribosomal ; protein-coding  
ErbB2 inter protein-coding  
RIKEN cDN. protein-coding  
ADP-ribosy protein-coding  
fos-like ant protein-coding  
leucine rich protein-coding  
tensin like protein-coding  
UDP-N-ace protein-coding  
pericentrin protein-coding  
protein ph; protein-coding  
protein ph; protein-coding  
caspase 8 protein-coding

guanine nu protein-coding  
engulfmen protein-coding  
sphingomy protein-coding  
HORMA do protein-coding  
importin 9 protein-coding  
outer dens protein-coding  
coiled-coil protein-coding  
dynein, axc protein-coding  
Rho guanin protein-coding  
PAP associ protein-coding  
ribulose-5- protein-coding  
adaptor-re protein-coding  
SRY (sex de protein-coding  
activin rece protein-coding  
nuclear rec protein-coding  
hydroxyste protein-coding  
arachidona protein-coding  
mitofusin 2 protein-coding  
solute carri protein-coding  
IscU iron-si protein-coding  
profilin 1 protein-coding  
B cell trans protein-coding  
microtubul protein-coding  
atlastin GT protein-coding  
MARVEL (n protein-coding  
short statu protein-coding  
chemokine protein-coding  
paired-like protein-coding  
nuclear poi protein-coding  
zinc finger protein-coding  
active BCR- protein-coding  
CDP-diacyl protein-coding  
signal trans protein-coding  
ring finger protein-coding  
S100 calciu protein-coding  
small integ protein-coding  
RIKEN cDN. protein-coding  
family with protein-coding  
transmemk protein-coding  
REV1 homc protein-coding  
tuftelin int protein-coding  
neugrin, ne protein-coding  
phenylalan protein-coding  
ubiquitin-c protein-coding  
ADP-ribosy protein-coding  
glucocortic protein-coding  
ATPase, H<sup>+</sup> protein-coding

DEAH (Asp- protein-coding  
Alport sync protein-coding  
zinc finger protein-coding  
RUN and F<sup>1</sup> protein-coding  
polypyrimi protein-coding  
mannosida protein-coding  
tetratricop protein-coding  
schwannor protein-coding  
SLAIN moti protein-coding  
MON1 hon protein-coding  
peroxiredo protein-coding  
dual specifi protein-coding  
vestigial lik protein-coding  
transmemk protein-coding  
non-SMC e protein-coding  
phosphoryl protein-coding  
heparan su protein-coding  
expressed : protein-coding  
ribosomal | protein-coding  
pleckstrin protein-coding  
apolipopro protein-coding  
zinc finger protein-coding  
acyl-CoA sy protein-coding  
chemokine protein-coding  
carboxypef protein-coding  
B cell CLL/l<sup>1</sup> protein-coding  
BCL6 intera protein-coding  
XRCC6 binc protein-coding  
DnaJ (Hsp4 protein-coding  
zinc finger, protein-coding  
coiled-coil | protein-coding  
poly(A) bin protein-coding  
membrane protein-coding  
stefin A2 protein-coding  
DPH1 homi protein-coding  
nuclear rec protein-coding  
GATA bindi protein-coding  
syntaxin 11 protein-coding  
transmemk protein-coding  
TAF11 RNA protein-coding  
dopey fami protein-coding  
hypocretin protein-coding  
centromer<sub>1</sub> protein-coding  
family with protein-coding  
heparan su protein-coding  
COP9 (cons protein-coding  
proteoglyc: protein-coding

tec protein protein-coding  
chemokine protein-coding  
interferon  $\gamma$  protein-coding  
proline-ser protein-coding  
TP53 regul protein-coding  
RIKEN cDN. protein-coding  
meiotic nu protein-coding  
gamma-glu protein-coding  
tripartite r protein-coding  
malonyl Co protein-coding  
lymphocyt protein-coding  
small integ protein-coding  
Eph recept protein-coding  
zinc finger protein-coding  
histocomp protein-coding  
proteoglyc protein-coding  
oxidative s protein-coding  
chemokine protein-coding  
abl-interac protein-coding  
adaptor-re protein-coding  
thromboxa protein-coding  
sphingosin protein-coding  
cytidine m protein-coding  
neuronal t protein-coding  
Max dimer protein-coding  
PTK2 prote protein-coding  
aminoacyl protein-coding  
round sper protein-coding  
protein ph protein-coding  
rhotekin 2 protein-coding  
RIKEN cDN. protein-coding  
actin, alpha protein-coding  
CDP-diacyl protein-coding  
LIM homec protein-coding  
hairy/enha protein-coding  
RIKEN cDN. protein-coding  
SET domair protein-coding  
SMAD fami protein-coding  
prostaglan protein-coding  
A kinase (P protein-coding  
ADP-ribosy protein-coding  
protein O-f protein-coding  
2-phospho protein-coding  
solute carri protein-coding  
WD repeat protein-coding  
vacuolar pr protein-coding  
transmemk protein-coding

SAP30-like protein-coding  
centrosom protein-coding  
ATPase, H<sup>+</sup> protein-coding  
mitochond protein-coding  
protein ph protein-coding  
low density protein-coding  
wingless-ty protein-coding  
growth fac protein-coding  
cyclin-depe protein-coding  
myelin pro protein-coding  
SWI5 depe protein-coding  
tyrosyl-tRN protein-coding  
zinc finger protein-coding  
transcriptic protein-coding  
ATPase, Na protein-coding  
cysteine an protein-coding  
zinc finger protein-coding  
StAR-relate protein-coding  
cytokine re protein-coding  
actin relate protein-coding  
glutaminas protein-coding  
Src homolc protein-coding  
solute carri protein-coding  
phospholip protein-coding  
TBC1 doma protein-coding  
aminopept protein-coding  
islet cell au protein-coding  
Rho guanin protein-coding  
insulin rece protein-coding  
low density protein-coding  
ATPase, Ca protein-coding  
angel hom protein-coding  
UDP-GalNA protein-coding  
RIKEN cDN. protein-coding  
TAF15 RNA protein-coding  
protein O-l protein-coding  
DNA segme protein-coding  
abhydrolas protein-coding  
mannose ri protein-coding  
peroxisom protein-coding  
cell divisor protein-coding  
growth arr protein-coding  
chymotryp protein-coding  
multiple C<sub>2</sub> protein-coding  
MICAL-like protein-coding  
necdin-like protein-coding  
poliovirus r protein-coding

tRNA splici protein-coding  
zinc finger protein-coding  
RIKEN cDN. protein-coding  
thioredoxin protein-coding  
CCAAT/enf protein-coding  
homeobox protein-coding  
renalase, F. protein-coding  
PIN2/TERF: protein-coding  
pyrroline-5 protein-coding  
esterase D, protein-coding  
tubulin tyrc protein-coding  
caspase act protein-coding  
regulator o protein-coding  
interferon : protein-coding  
inosine 5'- $\gamma$  protein-coding  
tudor dom: protein-coding  
DIRAS fami protein-coding  
solute carri protein-coding  
peroxisom: protein-coding  
zinc finger, protein-coding  
homeodon protein-coding  
ST6 (alpha- protein-coding  
proteaseor protein-coding  
RIKEN cDN. protein-coding  
RIKEN cDN. protein-coding  
nucleolin protein-coding  
lin-7 homo protein-coding  
dynein, axc protein-coding  
ankyrin re $\gamma$  protein-coding  
sprouty-rel protein-coding  
myeloid ce protein-coding  
hydroxyacy protein-coding  
DEAD (Asp- protein-coding  
UDP-N-ace protein-coding  
Aly/REF ex $\gamma$  protein-coding  
deafness, a protein-coding  
pyroglutar protein-coding  
ankyrin re $\gamma$  protein-coding  
TBC1 dom $\epsilon$  protein-coding  
karyopheri protein-coding  
enhancer c protein-coding  
coiled-coil- protein-coding  
caspase rec protein-coding  
sulfotransf: protein-coding  
regulator o protein-coding  
ras respon: protein-coding  
cholinergic protein-coding

sorting nex protein-coding  
Iroquois re protein-coding  
outer dens protein-coding  
peptidase i protein-coding  
regulatory protein-coding  
Ras associa protein-coding  
glucosamir protein-coding  
MAP/micrc protein-coding  
vav 1 oncoj protein-coding  
brain expre protein-coding  
DNA-dama protein-coding  
transmemk protein-coding  
mitogen-ac protein-coding  
sterol O-ac protein-coding  
inositol mo protein-coding  
A kinase (P protein-coding  
selenoprot protein-coding  
pleckstrin l protein-coding  
kinase supj protein-coding  
PR domain protein-coding  
expressed : protein-coding  
5'-3' exorib protein-coding  
olfactory rε protein-coding  
vacuolar pr protein-coding  
sortilin-relε protein-coding  
2-aminoetf protein-coding  
polymerase protein-coding  
dehydroge protein-coding  
adaptor-re protein-coding  
colony stir protein-coding  
MMS22-lik protein-coding  
cell divisor protein-coding  
tensin 3 protein-coding  
poly (ADP-i protein-coding  
adaptor-re protein-coding  
matrix met protein-coding  
SEC23A (S. protein-coding  
Era (G-prot protein-coding  
trans-actinj protein-coding  
chromodor protein-coding  
anaphase-ξ protein-coding  
adenylosuc protein-coding  
olfactory rε protein-coding  
UDP-GlcNA protein-coding  
ribosome ϕ protein-coding  
TNF recept protein-coding  
platelet de protein-coding



vacuolar pr protein-coding  
inositol 1,4 protein-coding  
Nipped-B h protein-coding  
WW domai protein-coding  
ribosomal j protein-coding  
NIN1/RPN1 protein-coding  
brain and r protein-coding  
zinc finger, protein-coding  
stonin 2 protein-coding  
zinc finger protein-coding  
oxysterol b protein-coding  
nitrilase 1 protein-coding  
ubiquitin C protein-coding  
ras respons protein-coding  
transmemk protein-coding  
glutamate- protein-coding  
LIM domai protein-coding  
chromodor protein-coding  
tetratricop protein-coding  
dihydrolipc protein-coding  
suppressio protein-coding  
Rho GTPas protein-coding  
Cbp/p300-i protein-coding  
gasdermin protein-coding  
ribonuclea: protein-coding  
colony stim protein-coding  
ferredoxin- protein-coding  
potassium protein-coding  
cyclin L2 protein-coding  
peroxisom: protein-coding  
carbohydr: protein-coding  
laminin, ga protein-coding  
centrosom. protein-coding  
DNA-dama protein-coding  
myosin, ligl protein-coding  
forkhead b protein-coding  
unc-13 hor protein-coding  
G-protein c protein-coding  
pecanex-lik protein-coding  
transmemk protein-coding  
baculoviral protein-coding  
UbiA preny protein-coding  
pleiomorpl protein-coding  
small nucle protein-coding  
ribonuclea: protein-coding  
UBX domai protein-coding  
deoxynucle protein-coding

lipoma HM protein-coding  
phosphatic protein-coding  
microsoma protein-coding  
SMAD spec protein-coding  
acyl-Coenz protein-coding  
solute carri protein-coding  
signal reco protein-coding  
ubiquitin-c protein-coding  
ATPase, an protein-coding  
cDNA sequ protein-coding  
ubinuclen protein-coding  
RIKEN cDN. protein-coding  
ankyrin re protein-coding  
mitogen-ac protein-coding  
sigma non- protein-coding  
phosphatic protein-coding  
nudix (nucl protein-coding  
mannosida protein-coding  
translocase protein-coding  
coiled-coil protein-coding  
growth fac protein-coding  
phospholip protein-coding  
kinesin far protein-coding  
family with protein-coding  
RAR-relate protein-coding  
predicted g protein-coding  
aspartyl-tR protein-coding  
RNA bindin protein-coding  
potassium protein-coding  
plexin dom protein-coding  
aurora kin protein-coding  
poliovirus r protein-coding  
mitochond protein-coding  
copine III protein-coding  
TBC1 doma protein-coding  
LIM domaii protein-coding  
REX1, RNA protein-coding  
paired box protein-coding  
SAR1 gene protein-coding  
RIKEN cDN. protein-coding  
pleckstrin l protein-coding  
regulator o protein-coding  
H2A histon protein-coding  
CDC42 sma protein-coding  
methyltran protein-coding  
amyotroph protein-coding  
paraspeckl protein-coding

E26 avian I $\beta$  protein-coding  
Bloom sync protein-coding  
myosin, ligl protein-coding  
acyl-Coenz $\beta$  protein-coding  
MAP kinase protein-coding  
transmem $\beta$  protein-coding  
chloride ch protein-coding  
ribosomal I protein-coding  
cell divisor protein-coding  
family with protein-coding  
predicted  $\xi$  protein-coding  
MAX gene protein-coding  
cytochrom $\beta$  protein-coding  
transducin $\beta$  protein-coding  
ring finger protein-coding  
family with protein-coding  
estrogen r $\epsilon$  protein-coding  
interleukin protein-coding  
transferrin protein-coding  
zinc finger, protein-coding  
tRNA meth protein-coding  
KDEL (Lys- $\beta$ ) protein-coding  
cyclin-depe protein-coding  
stromal int protein-coding  
myeloid/ly $\beta$  protein-coding  
ER membr $\beta$  protein-coding  
ras respon $\beta$  protein-coding  
coiled-coil protein-coding  
pyroglutar protein-coding  
activating t protein-coding  
methylene protein-coding  
peroxisom $\beta$  protein-coding  
SET and M $\beta$  protein-coding  
SH2B adap protein-coding  
regulatory protein-coding  
polymeras $\epsilon$  protein-coding  
peptidase ( protein-coding  
TRAF3 inte protein-coding  
myristoylat protein-coding  
golgi meml protein-coding  
ARP3 actin protein-coding  
cyclin-depe protein-coding  
multiple EC protein-coding  
Ly6/Plaur c protein-coding  
solute carri protein-coding  
transmem $\beta$  protein-coding  
shugoshin- protein-coding

transforma protein-coding  
RIKEN cDN. protein-coding  
phosphatic protein-coding  
zinc finger protein-coding  
trophinin a protein-coding  
leucine rich protein-coding  
kizuna cent protein-coding  
FCH and dc protein-coding  
integrator ( protein-coding  
polymeras( protein-coding  
AT rich inte protein-coding  
peroxisom( protein-coding  
PHD finger protein-coding  
trypsin 4 protein-coding  
nescient h( protein-coding  
DNA segm( protein-coding  
spindle ass protein-coding  
chondroitir protein-coding  
solute carri protein-coding  
SWI/SNF-r( protein-coding  
elongation protein-coding  
RAB, meml protein-coding  
BTB (POZ) ( protein-coding  
componen( protein-coding  
phosphatic protein-coding  
family with protein-coding  
ring finger protein-coding  
adenylate ( protein-coding  
ras homolc protein-coding  
TNF recept protein-coding  
processing protein-coding  
glycophorir protein-coding  
cleavage ar protein-coding  
eukaryotic protein-coding  
transmemk protein-coding  
alkaline ph protein-coding  
CD47 antig protein-coding  
cytochrom( protein-coding  
Ras associa protein-coding  
DENN/MAI protein-coding  
leucine rich protein-coding  
sema dom( protein-coding  
snail family protein-coding  
B cell leuke protein-coding  
minichrom protein-coding  
phospholip protein-coding  
DEAD/H (A protein-coding

ankyrin reꝑ protein-coding  
ER degrada protein-coding  
KAT8 regul protein-coding  
spermatog protein-coding  
YTH domai protein-coding  
RAD54 hon protein-coding  
TBC1 domaꝑ protein-coding  
ubiquitin sꝑ protein-coding  
cyclin Pas1, protein-coding  
acidic (leuc protein-coding  
follistatin-li protein-coding  
adenosine protein-coding  
kinesin farr protein-coding  
dual specifi protein-coding  
phosphatic protein-coding  
Rho GTPasꝑ protein-coding  
stefin A2 lil protein-coding  
RIKEN cDN. protein-coding  
special AT- protein-coding  
BCL2 modifi protein-coding  
transforme protein-coding  
guanine nu protein-coding  
PDS5, regu protein-coding  
RIKEN cDN. protein-coding  
1-acylglyce protein-coding  
fatty acid d protein-coding  
protease, s protein-coding  
nuclear fraꝑ protein-coding  
signal transꝑ protein-coding  
nucleobind protein-coding  
membrane protein-coding  
cysteine-ric protein-coding  
collagen, tꝑ protein-coding  
transcriptic protein-coding  
CUGBP, Ela protein-coding  
ST8 alpha-I protein-coding  
Ras-like wit protein-coding  
MGAT4 fan protein-coding  
xylosyltran protein-coding  
RIKEN cDN. protein-coding  
cyclin G2 protein-coding  
hypoxia inc protein-coding  
mitogen-ac protein-coding  
kinesin farr protein-coding  
SCP2 sterol protein-coding  
transmemkꝑ protein-coding  
tubulin, alꝑ protein-coding

integrin alç protein-coding  
epithelial n protein-coding  
potassium protein-coding  
serum/gluc protein-coding  
inhibin bet. protein-coding  
alpha-kinas protein-coding  
Williams-B protein-coding  
G protein-c protein-coding  
phospholy protein-coding  
MACRO do protein-coding  
predicted ç protein-coding  
DCP2 deca protein-coding  
ADP-ribosy protein-coding  
MDS1 and protein-coding  
sperm flag protein-coding  
zinc finger protein-coding  
zinc finger protein-coding  
metallo-be protein-coding  
tetratricop protein-coding  
mitochond protein-coding  
MAP kinas protein-coding  
Fc receptor protein-coding  
predicted ç protein-coding  
syntaxin 1ç protein-coding  
Rhesus blo protein-coding  
kelch domç protein-coding  
SUMO1/se protein-coding  
nuclear rec protein-coding  
centrosom. protein-coding  
SH3 and Pç protein-coding  
small EDRK protein-coding  
mannosida protein-coding  
protein ph protein-coding  
NCK-associ protein-coding  
valyl-tRNA protein-coding  
fucokinase protein-coding  
coiled-coil protein-coding  
phosphopr protein-coding  
sushi domç protein-coding  
NDC1 trans protein-coding  
mitochond protein-coding  
cerebral dc protein-coding  
cDNA sequ protein-coding  
GC-rich prc protein-coding  
thymopoie protein-coding  
antigen ide protein-coding  
DEAD (Asp. protein-coding

nuclear dis protein-coding  
PRP39 pre- protein-coding  
protein kin protein-coding  
high mobili protein-coding  
prosaposin protein-coding  
DENN/MAI protein-coding  
X-linked m protein-coding  
RIKEN cDN. protein-coding  
nuclear fac protein-coding  
trans-actin protein-coding  
zinc finger protein-coding  
glutathione protein-coding  
ribosomal protein-coding  
TBC1 dom protein-coding  
mahogunir protein-coding  
solute carri protein-coding  
pleckstrin protein-coding  
BTB (POZ) protein-coding  
oculocutan protein-coding  
mannoside protein-coding  
HEAT repe protein-coding  
anaphase protein-coding  
solute carri protein-coding  
surfeit gen protein-coding  
Ras associa protein-coding  
translocate protein-coding  
Kruppel-lik protein-coding  
glucose-fru protein-coding  
transmem protein-coding  
chemokine protein-coding  
sphingomy protein-coding  
S-antigen, protein-coding  
RAB18, me protein-coding  
serine (or c protein-coding  
integrin alpha protein-coding  
sarcolemm protein-coding  
lectin, gala protein-coding  
MAS-relate protein-coding  
lysosomal- protein-coding  
mitogen-ac protein-coding  
enoyl Coen protein-coding  
PDZ and LII protein-coding  
eyes absen protein-coding  
signal pept protein-coding  
sorting nex protein-coding  
mitochond protein-coding  
WAS/WASL protein-coding

predicted g protein-coding  
zinc fingers protein-coding  
protease, s protein-coding  
DnaJ (Hsp4 protein-coding  
paralemmi protein-coding  
SUMO1 act protein-coding  
HECT domæ protein-coding  
thiamine tr protein-coding  
family with protein-coding  
leucine rich protein-coding  
synaptotag protein-coding  
lysosomal t protein-coding  
ring finger protein-coding  
toll-like rec protein-coding  
tubulin, be protein-coding  
killer cell le protein-coding  
prune hom protein-coding  
methyltran protein-coding  
splicing fac protein-coding  
monocyte i protein-coding  
SEC22 vesic protein-coding  
ring finger protein-coding  
distal-less l protein-coding  
dCTP pyroç protein-coding  
PHD finger protein-coding  
basic leucir protein-coding  
solute carri protein-coding  
NADH dehy protein-coding  
DENN/MAI protein-coding  
ring finger protein-coding  
solute carri protein-coding  
Max intera protein-coding  
PRP4 pre-n protein-coding  
ubiquitin-c protein-coding  
NADH dehy protein-coding  
minichrom protein-coding  
tet methylç protein-coding  
branched c protein-coding  
non-SMC e protein-coding  
zinc finger protein-coding  
ring finger protein-coding  
cadherin 8 protein-coding  
myc induce protein-coding  
centromeri protein-coding  
ceramide s protein-coding  
SR-related protein-coding  
centrosom. protein-coding



ubiquitinat protein-coding  
protein tyr protein-coding  
microsemir protein-coding  
zinc finger protein-coding  
NLR family protein-coding  
WD repeat protein-coding  
GC-rich prc protein-coding  
a disintegri protein-coding  
YY1 transcr protein-coding  
phosphatic protein-coding  
DNA segmε protein-coding  
ELAV (emb protein-coding  
RIKEN cDN. protein-coding  
protein ph protein-coding  
PWP1 hom protein-coding  
metallothic protein-coding  
ubiquitin-li protein-coding  
neuregulin protein-coding  
charged mi protein-coding  
CD1d1 anti protein-coding  
myelin-ass protein-coding  
protein ph protein-coding  
RIKEN cDN. protein-coding  
catsper chε protein-coding  
ephrin B1 protein-coding  
MOB kinas protein-coding  
5-azacytidi protein-coding  
vesicle-ass protein-coding  
family with protein-coding  
MAK16 hor protein-coding  
heterogenε protein-coding  
zinc finger protein-coding  
COP9 (cons protein-coding  
S100 calciu protein-coding  
acyl-coenz protein-coding  
zinc finger protein-coding  
LLP homolc protein-coding  
AT rich inte protein-coding  
interleukin protein-coding  
2-aminoetf protein-coding  
helicase, ly protein-coding  
vacuolar pr protein-coding  
annexin A3 protein-coding  
kinesin ligh protein-coding  
RAS-like, fa protein-coding  
F-box protε protein-coding  
family with protein-coding

zinc finger protein-coding  
Cbp/p300-i protein-coding  
cAMP resp. protein-coding  
MAS-relate protein-coding  
melanoreg protein-coding  
solute carri protein-coding  
signal reco protein-coding  
WD repeat protein-coding  
FAD-depen protein-coding  
zinc finger protein-coding  
cyclin-depe protein-coding  
cytochrom protein-coding  
RAB11A, m protein-coding  
early growi protein-coding  
phosphodi protein-coding  
neuropilin protein-coding  
Rho GTPas protein-coding  
zinc finger protein-coding  
cell growth protein-coding  
superkiller protein-coding  
5-phospho protein-coding  
PET112 ho protein-coding  
CCCTC-binc protein-coding  
formin-like protein-coding  
F-box and I protein-coding  
Sjogren syr protein-coding  
RNA bindin protein-coding  
mitogen-ac protein-coding  
transmemk protein-coding  
zinc finger, protein-coding  
coiled-coil protein-coding  
phosphorit protein-coding  
unc-45 hon protein-coding  
coiled-coil protein-coding  
protein kin protein-coding  
histone clu protein-coding  
cell divisior protein-coding  
kin of IRRE protein-coding  
uridine mo protein-coding  
N(alpha)-a protein-coding  
prostate tu protein-coding  
DnaJ (Hsp4 protein-coding  
RIKEN cDN. protein-coding  
tumor-assc protein-coding  
xyloside xy protein-coding  
sine oculis- protein-coding  
a disintegri protein-coding

solute carrier protein-coding  
histidine deaminase protein-coding  
TBC1 domain protein-coding  
transport associated protein-coding  
autophagy protein-coding  
presenilin 2 protein-coding  
transcriptase protein-coding  
anti-silencing protein-coding  
vasodilator protein-coding  
hairy and enhancer of split protein-coding  
ATP/GTP binding protein-coding  
lactalbumin protein-coding  
ubiquitin specific protease protein-coding  
killer cell lectin-like receptor protein-coding  
influenza virus protein-coding  
high mobility group protein-coding  
ring finger protein-coding  
cadherin, E protein-coding  
translocase protein-coding  
CCZ1 vacuole protein-coding  
TNFAIP3 protein-coding  
zinc finger protein-coding  
cullin 4A protein-coding  
glucan (1,4)-beta-D-glucanase protein-coding  
NME/NM2 protein-coding  
RNA binding protein-coding  
propionyl-CoA synthetase protein-coding  
dipeptidyl aminopeptidase protein-coding  
myeloperoxidase protein-coding  
septin 8 protein-coding  
4S short chain alpha-2-macroglobulin protein-coding  
zinc finger protein-coding  
CD9 antigen protein-coding  
ring finger protein-coding  
ubiquilin 4 protein-coding  
interleukin protein-coding  
chromodomain protein-coding  
X Kell blood group protein-coding  
transmembrane protein-coding  
dihydrodipicolinate synthase protein-coding  
nucleolar protein-coding  
nucleolin protein-coding  
UDP-Gal:beta-D-glucanase protein-coding  
zinc finger protein-coding  
cyclin D-type protein-coding  
somatostatin protein-coding  
ephrin A1 protein-coding

mediator c protein-coding  
transmemk protein-coding  
cDNA sequ protein-coding  
POM121 m protein-coding  
Ras associa protein-coding  
family with protein-coding  
lipin 2 protein-coding  
tRNA meth protein-coding  
histone de; protein-coding  
fos-like ant protein-coding  
glyceropho protein-coding  
immature c protein-coding  
tumor prot protein-coding  
spermine c protein-coding  
glucagon-li protein-coding  
calcium/ca protein-coding  
paired-like protein-coding  
serine/thre protein-coding  
cell divisor protein-coding  
alkB, alkyla protein-coding  
SAFB-like, t protein-coding  
RAD23b ho protein-coding  
3-hydroxyi; protein-coding  
transmemk protein-coding  
microsoma protein-coding  
myosin, ligl protein-coding  
ArfGAP wit protein-coding  
adenomatc protein-coding  
Kruppel-lik protein-coding  
ATPase inh protein-coding  
NLR family, protein-coding  
polymeras; protein-coding  
ubiquitin s; protein-coding  
protein ph; protein-coding  
pentatricof; protein-coding  
family with protein-coding  
TNF recept protein-coding  
zinc finger, protein-coding  
interleukin protein-coding  
serine hydr protein-coding  
Rho GTPas; protein-coding  
ATP-bindin protein-coding  
C-type lecti protein-coding  
zinc finger protein-coding  
ras homolc protein-coding  
fumarylace protein-coding  
RIO kinase protein-coding

cleavage ar protein-coding  
inositol 1,4 protein-coding  
pleckstrin l protein-coding  
RAS p21 pr protein-coding  
N(alpha)-a protein-coding  
zinc finger protein-coding  
neuron nav protein-coding  
sushi doma protein-coding  
ceramide s protein-coding  
desumoyla protein-coding  
family with protein-coding  
serine (or c protein-coding  
mitochond protein-coding  
Fas-activat protein-coding  
SMAD fami protein-coding  
EF-hand ca protein-coding  
scinderin protein-coding  
mitochond protein-coding  
lactate deh protein-coding  
olfactomec protein-coding  
ankyrin re protein-coding  
adaptor-re protein-coding  
nicalin hor protein-coding  
S-adenosyl protein-coding  
Prkr intera protein-coding  
regulator o protein-coding  
proviral int protein-coding  
E2F transcr protein-coding  
brain expre protein-coding  
ATPase, Ca protein-coding  
kaptin protein-coding  
predicted g protein-coding  
mitochond protein-coding  
solute carri protein-coding  
survival mc protein-coding  
coiled-coil protein-coding  
activating t protein-coding  
coiled-coil protein-coding  
YME1-like protein-coding  
calpain 10 protein-coding  
wingless-ty protein-coding  
KAT8 regul protein-coding  
transmemt protein-coding  
PDS5, regu protein-coding  
helicase wi protein-coding  
potassium protein-coding  
cathepsin l protein-coding

protein tyri protein-coding  
recombina protein-coding  
utrophin protein-coding  
T cell, imm protein-coding  
cell divisior protein-coding  
transforma protein-coding  
C-terminal protein-coding  
taspase, th protein-coding  
ALS2 C-terr protein-coding  
syntaxin bi protein-coding  
meningiom protein-coding  
potassium protein-coding  
ELOVL fam protein-coding  
basonuclin protein-coding  
zinc finger protein-coding  
calcium/ca protein-coding  
SWA-70 pr protein-coding  
xenotropic protein-coding  
transmemk protein-coding  
nuclear fac protein-coding  
SRY (sex de protein-coding  
gypsy retrc protein-coding  
SCP2 sterol protein-coding  
UDP-GlcNA protein-coding  
regulator o protein-coding  
tumor necr protein-coding  
general tra protein-coding  
membrane protein-coding  
translocase protein-coding  
sorting nex protein-coding  
annexin A6 protein-coding  
tyrosyl-tRN protein-coding  
interleukin protein-coding  
olfactory rε protein-coding  
formin-like protein-coding  
coagulator protein-coding  
nudix (nucl protein-coding  
mannose-6 protein-coding  
attractin lik protein-coding  
histone clu protein-coding  
family with protein-coding  
RIKEN cDN. protein-coding  
alpha glucc protein-coding  
tribbles ho protein-coding  
olfactomec protein-coding  
DEAH (Asp. protein-coding  
basic leucir protein-coding

RIKEN cDN. protein-coding  
vacuolar pr protein-coding  
oxysterol b protein-coding  
transcriptic protein-coding  
poly(A) bin protein-coding  
adenosine protein-coding  
RING1 and protein-coding  
lysophosph protein-coding  
acid phosph protein-coding  
GSG1-like protein-coding  
Kruppel-lik protein-coding  
transmemk protein-coding  
cytochrom protein-coding  
F-box prote protein-coding  
tripartite r protein-coding  
transmemk protein-coding  
papillary re protein-coding  
kelch-like 2 protein-coding  
ribosomal j protein-coding  
glutaredox protein-coding  
RIKEN cDN. protein-coding  
ubiquitin sj protein-coding  
armadillo r protein-coding  
EP300 inte protein-coding  
multiple C2 protein-coding  
osteopetro protein-coding  
COMM dor protein-coding  
WD repeat protein-coding  
RIKEN cDN. protein-coding  
Casitas B-li protein-coding  
autophagy protein-coding  
NLR family, protein-coding  
leucine rich protein-coding  
olfactory r protein-coding  
leucine rich protein-coding  
peroxisom protein-coding  
solute carri protein-coding  
translocase protein-coding  
gem (nucle protein-coding  
RIKEN cDN. protein-coding  
CGG triplet protein-coding  
hydroxycar protein-coding  
CD180 anti protein-coding  
ligand dep protein-coding  
polymerase protein-coding  
solute carri protein-coding  
protein tyr protein-coding

lysosomal-; protein-coding  
bone marr protein-coding  
src homolo protein-coding  
CDK5 and / protein-coding  
CREB3 regu protein-coding  
taspase, th protein-coding  
serine/thre protein-coding  
oxidation r protein-coding  
Kruppel-lik protein-coding  
THO compl protein-coding  
ankyrin re; protein-coding  
carbonic ar protein-coding  
Rap guanin protein-coding  
myeloblast protein-coding  
ribonucleo; protein-coding  
Abelson he protein-coding  
calcyclin bi protein-coding  
basic leucir protein-coding  
SH3-bindin protein-coding  
WD repeat protein-coding  
cDNA sequ protein-coding  
glucan (1,4 protein-coding  
EH domain protein-coding  
CD84 antig protein-coding  
membrane protein-coding  
phosphatic protein-coding  
serine/argi protein-coding  
DnaJ (Hsp4 protein-coding  
adaptor-re protein-coding  
heterogen; protein-coding  
zinc finger, protein-coding  
inhibitor of protein-coding  
zinc finger protein-coding  
protein ph; protein-coding  
mucosa as; protein-coding  
zinc finger protein-coding  
Abelson he protein-coding  
transcriptic protein-coding  
transcriptic protein-coding  
nucleopori protein-coding  
Rho guanin protein-coding  
TatD DNas; protein-coding  
acyl-CoA th; protein-coding  
transmemk protein-coding  
sarcoglycar protein-coding  
transcriptic protein-coding  
glutamate protein-coding



toll-like rec protein-coding  
torsin fami protein-coding  
cytochrom protein-coding  
myotrophii protein-coding  
dishevellec protein-coding  
signal recoi protein-coding  
prostaglani protein-coding  
protein phi protein-coding  
SECIS bindi protein-coding  
Janus kinas protein-coding  
poly (ADP-ri protein-coding  
apoptotic r protein-coding  
adrenergic protein-coding  
astrotactin protein-coding  
transforma protein-coding  
aminolevul protein-coding  
NFU1 iron- protein-coding  
dCMP dear protein-coding  
serine (or c protein-coding  
phosphoini protein-coding  
transcriptic protein-coding  
cyclin L1 protein-coding  
tyrosine 3-ri protein-coding  
X-ray repai protein-coding  
SRY (sex de protein-coding  
kinesin farr protein-coding  
arrestin do protein-coding  
lymphocyt protein-coding  
Rho GTPasi protein-coding  
INO80 horr protein-coding  
non-SMC e protein-coding  
LON peptid protein-coding  
deleted in i protein-coding  
cornichon l protein-coding  
f-box prote protein-coding  
adenosine protein-coding  
thymocyte protein-coding  
tetraspanir protein-coding  
U2 small ni protein-coding  
family with protein-coding  
multiple EC protein-coding  
low density protein-coding  
high mobili protein-coding  
solute carri protein-coding  
lamin B rec protein-coding  
RIKEN cDN. protein-coding  
cytochrom protein-coding

adenosine protein-coding  
death-asso protein-coding  
valyl-tRNA protein-coding  
adenosine protein-coding  
cyclin M3 protein-coding  
oligosacch protein-coding  
zinc finger, protein-coding  
ORAI calciu protein-coding  
heparan su protein-coding  
voltage-de protein-coding  
progesteron a protein-coding  
zinc finger protein-coding  
C1GALT1-s protein-coding  
transcriptic protein-coding  
ring finger protein-coding  
zinc finger protein-coding  
RIKEN cDN. protein-coding  
ribosomal protein-coding  
PDZ domai protein-coding  
HCLS1 bind protein-coding  
WNK lysine protein-coding  
proline rich protein-coding  
carbamoil- protein-coding  
coiled-coil- protein-coding  
TBC1 domai protein-coding  
kinesin farr protein-coding  
feminizatio protein-coding  
arylsulfata protein-coding  
RIKEN cDN. protein-coding  
lines homo protein-coding  
SET domai protein-coding  
heterogen protein-coding  
predicted protein-coding  
GRAM domai protein-coding  
hydroxyste protein-coding  
runt-relate protein-coding  
GTPase, ve protein-coding  
dual specifi protein-coding  
split hand/ protein-coding  
protein kin protein-coding  
transcriptic protein-coding  
transmembr protein-coding  
parvin, gan protein-coding  
RAS, dexan protein-coding  
DNA segm protein-coding  
cytidine m protein-coding  
dermatan s protein-coding

chemokine protein-coding  
A kinase (P protein-coding  
cyclic nucle protein-coding  
E4F transcr protein-coding  
hippocamp protein-coding  
ERO1-like ( protein-coding  
syntaxin 6 protein-coding  
SH3-domai protein-coding  
RIKEN cDN. protein-coding  
prickle hon protein-coding  
5'-nucleoti protein-coding  
tripartite r protein-coding  
solute carri protein-coding  
K(lysine) ac protein-coding  
acyl-Coenz protein-coding  
adiponectii protein-coding  
sortilin-rel protein-coding  
aspartate-k protein-coding  
brain prote protein-coding  
vascular en protein-coding  
zinc finger protein-coding  
proteasom protein-coding  
makorin, ri protein-coding  
secreted fr protein-coding  
LIM and se protein-coding  
aldehyde d protein-coding  
transmemk protein-coding  
calpain, sm protein-coding  
immunogl protein-coding  
adaptor pri protein-coding  
RIKEN cDN. protein-coding  
RIKEN cDN. protein-coding  
FK506 bind protein-coding  
splicing fac protein-coding  
CTAGE fam protein-coding  
breast can protein-coding  
cyclin L1 protein-coding  
ATP-bindin protein-coding  
calcium re protein-coding  
N-acetyltra protein-coding  
solute carri protein-coding  
integrin be protein-coding  
prothymos protein-coding  
suppressor protein-coding  
autophagy protein-coding  
OTU domai protein-coding  
Ras homol protein-coding

integral membrane protein-coding  
guanine nucleotide protein-coding  
sphingosin protein-coding  
fibronectin protein-coding  
viral simian protein-coding  
exocyst core protein-coding  
insulin receptor protein-coding  
triggering receptor protein-coding  
ubiquitin specific protein-coding  
cell adhesion protein-coding  
predicted gene protein-coding  
CTD (carboxyl-terminal domain) protein-coding  
protein tyrosine protein-coding  
nuclear autoantigen protein-coding  
insulin-like growth factor protein-coding  
ubiquitin specific protein-coding  
lipase, family protein-coding  
NME/NM2 protein-coding  
DnaJ (Hsp40) protein-coding  
doublecortin protein-coding  
polymerase protein-coding  
transient receptor protein-coding  
nicalin homolog protein-coding  
oxysterol binding protein-coding  
L-amino acid protein-coding  
SUMO/senescence protein-coding  
adiponectin protein-coding  
transmembrane protein-coding  
nuclear factor protein-coding  
DCP1 decapping protein-coding  
phosphoinositide protein-coding  
diacylglycerol protein-coding  
splicing factor protein-coding  
RB1-induced protein-coding  
FMS-like tyrosine protein-coding  
coiled-coil protein-coding  
neuron derived protein-coding  
solute carrier protein-coding  
claudin 12 protein-coding  
calcium channel protein-coding  
Rho GDP dissociation protein-coding  
nucleolar protein-coding  
alanyl-tRNA protein-coding  
heat shock protein-coding  
cytochrome protein-coding  
cholinergic protein-coding  
GA repeat protein-coding

glypican 1 protein-coding  
NHL repeat protein-coding  
mannoside protein-coding  
phosphorit protein-coding  
CWC27 spli protein-coding  
organic sol protein-coding  
F-box prote protein-coding  
mitochond protein-coding  
WW domai protein-coding  
glutathione protein-coding  
klotho beta protein-coding  
netrin 3 protein-coding  
Rho guanin protein-coding  
dynamin 2 protein-coding  
RNA bindin protein-coding  
NADH dehy protein-coding  
glia matura protein-coding  
Kruppel-lik protein-coding  
H2A histon protein-coding  
major facili protein-coding  
acylpeptide protein-coding  
Fc receptor protein-coding  
metallophc protein-coding  
LFNG O-fuc protein-coding  
protein kin protein-coding  
sex comb c protein-coding  
lipopolysac protein-coding  
zyg-II famil protein-coding  
guanylate l protein-coding  
signal-indu protein-coding  
predicted g protein-coding  
SET and M<sup>1</sup> protein-coding  
non-catalyl protein-coding  
stomatin protein-coding  
polycystic l protein-coding  
zinc finger protein-coding  
mitochond protein-coding  
low density protein-coding  
N(alpha)-ac protein-coding  
aspartyl-tR protein-coding  
Parkinson c protein-coding  
proviral int protein-coding  
thioredoxir protein-coding  
NOP10 ribc protein-coding  
transmemk protein-coding  
mediator c protein-coding  
myelocytor protein-coding

delta-like 2 protein-coding  
forkhead b protein-coding  
zinc finger protein-coding  
protein-L-is protein-coding  
islet cell au protein-coding  
regulator o protein-coding  
G protein-c protein-coding  
zinc finger protein-coding  
pleckstrin l protein-coding  
solute carri protein-coding  
split hand/ protein-coding  
related RA protein-coding  
NCK intera protein-coding  
monoglyce protein-coding  
solute carri protein-coding  
Jun dimeriz protein-coding  
Josephin d protein-coding  
SUN domai protein-coding  
stearoyl-Cc protein-coding  
ribosomal j protein-coding  
cDNA sequ protein-coding  
U2AF homc protein-coding  
transcriptic protein-coding  
emerin protein-coding  
ubiquitinat protein-coding  
zinc finger protein-coding  
MOB kinas protein-coding  
heterogen protein-coding  
secretory c protein-coding  
family with protein-coding  
twisted gas protein-coding  
period circ protein-coding  
mannosyl-c protein-coding  
ubiquitin-a protein-coding  
Max protei protein-coding  
centrosom protein-coding  
serological protein-coding  
thymidine l protein-coding  
protein ph protein-coding  
ErbB2 inter protein-coding  
jun proto-c protein-coding  
hippocalcir protein-coding  
interferon protein-coding  
mitochond protein-coding  
membrane protein-coding  
BCL2-assoc protein-coding  
BCL2-like 1 protein-coding

cysteine co protein-coding  
ets variant protein-coding  
fibronectin protein-coding  
zinc finger, protein-coding  
prostaglan protein-coding  
hexosamin protein-coding  
zona pelluc protein-coding  
Wolf-Hirscl protein-coding  
kelch-like 2 protein-coding  
phospholip protein-coding  
excision rej protein-coding  
cytochrom protein-coding  
ATPase fan protein-coding  
PAK1 inter; protein-coding  
GIPC PDZ d protein-coding  
endothelin protein-coding  
sema dom; protein-coding  
polymerase protein-coding  
eukaryotic protein-coding  
high mobili protein-coding  
solute carri protein-coding  
tetratricop protein-coding  
coiled-coil protein-coding  
dymeclin protein-coding  
homeobox protein-coding  
PNMA-like protein-coding  
coagulator protein-coding  
RNA bindin protein-coding  
MUS81 enc protein-coding  
neural prec protein-coding  
coagulator protein-coding  
predicted g protein-coding  
ADAMTS-lil protein-coding  
WW domai protein-coding  
guanine nu protein-coding  
leucine rich protein-coding  
staufen (R) protein-coding  
La ribonucl protein-coding  
ribonuclea; protein-coding  
glucosamir protein-coding  
myosin IXb protein-coding  
solute carri protein-coding  
solute carri protein-coding  
prion prote protein-coding  
secretory c protein-coding  
DNA segmε protein-coding  
E74-like fac protein-coding

protein ph protein-coding  
phosphorik protein-coding  
scribbled h protein-coding  
phosphatic protein-coding  
nucleopori protein-coding  
lymphocyte protein-coding  
proteasom protein-coding  
ADP-ribosy protein-coding  
3-hydroxy- protein-coding  
ring finger protein-coding  
cDNA sequ protein-coding  
cysteine-ric protein-coding  
cleft lip anc protein-coding  
WD repeat protein-coding  
N-myc dow protein-coding  
phosphatic protein-coding  
xanthine di protein-coding  
protein ph protein-coding  
ribosomal I protein-coding  
capping pr protein-coding  
CDC16 cell protein-coding  
mitochond protein-coding  
dual specifi protein-coding  
MCM (mini protein-coding  
death asso protein-coding  
splicing fac protein-coding  
Rho GTPas protein-coding  
SR-related protein-coding  
lipopolysac protein-coding  
coiled-coil protein-coding  
selenium b protein-coding  
MAP kinas protein-coding  
glutathione protein-coding  
sterile alph protein-coding  
DTW doma protein-coding  
ARP1 actin protein-coding  
SUB1 hom protein-coding  
ribose 5-ph protein-coding  
small VCP/ protein-coding  
sorting nex protein-coding  
NEDD4 bin protein-coding  
B cell trans protein-coding  
ATPase, Na protein-coding  
protein ph protein-coding  
BRCA1 inte protein-coding  
G protein-c protein-coding  
activating s protein-coding



coiled-coil protein-coding  
proline rich protein-coding  
RCS domain protein-coding  
solute carrier protein-coding  
ubiquitin-c protein-coding  
Rap guanine protein-coding  
ubiquitin s protein-coding  
upstream k protein-coding  
glutathione protein-coding  
myelin protein-coding  
forkhead b protein-coding  
carbonyl re protein-coding  
pleckstrin ε protein-coding  
retrotranscriptase protein-coding  
LSM7 homolog protein-coding  
teneurin tr protein-coding  
B cell CLL/lymphoma protein-coding  
ring finger protein-coding  
gem (nucleosome) protein-coding  
SNF2 histone protein-coding  
cerebral dc protein-coding  
protein arginine protein-coding  
PH domain protein-coding  
zinc finger protein-coding  
histamine r protein-coding  
solute carrier protein-coding  
WD repeat protein-coding  
lysosomal- protein-coding  
cartilage as protein-coding  
CCR4-NOT protein-coding  
REV1 homolog protein-coding  
DCN1, defense protein-coding  
G protein-coupled protein-coding  
SWI/SNF repressor protein-coding  
RAS, guanine protein-coding  
spectrin re protein-coding  
SRY (sex determining) protein-coding  
ribosomal protein-coding  
special AT-binding protein-coding  
calpain 7 protein-coding  
transcription factor protein-coding  
LON peptidase protein-coding  
centrosomal protein-coding  
chondroitin protein-coding  
caspase 3 protein-coding  
6-phospho protein-coding  
early growth protein-coding

GDNF-indu protein-coding  
hexokinase protein-coding  
B cell receę protein-coding  
histone de; protein-coding  
RAB21, me protein-coding  
tet methyl; protein-coding  
SH2 domai protein-coding  
mitogen-ac protein-coding  
inositol pol protein-coding  
5-phospho protein-coding  
mitogen-ac protein-coding  
kinesin far; protein-coding  
selenocyst; protein-coding  
ribosomal ; protein-coding  
branched c protein-coding  
kelch repe; protein-coding  
Tia1 cytoto protein-coding  
FYVE, RhoC protein-coding  
cyclic nucle protein-coding  
ubiquitin s; protein-coding  
Dmx-like 2 protein-coding  
testicular c protein-coding  
family with protein-coding  
secretograi protein-coding  
sulfide quir protein-coding  
tripartite r; protein-coding  
kinesin far; protein-coding  
RIKEN cDN. protein-coding  
calcium/ca protein-coding  
excision re; protein-coding  
hydroxyste protein-coding  
family with protein-coding  
proteasom protein-coding  
excision re; protein-coding  
transport a protein-coding  
potassium protein-coding  
mitogen-ac protein-coding  
serine/thre protein-coding  
cytohesin 1 protein-coding  
RAB5B, me protein-coding  
mitochond protein-coding  
diaphanou; protein-coding  
angiomotir protein-coding  
hydroxyste protein-coding  
ATP syntha protein-coding  
ets variant protein-coding  
natriuretic protein-coding

alcohol dehydrogenase protein-coding  
WNT1 inducible protein-coding  
bromodomain protein-coding  
neilike3 protein-coding  
tetraatricoprotein-coding  
ribosome biogenesis protein-coding  
synemin, interactor protein-coding  
solute carrier protein-coding  
lysophosphatidyl protein-coding  
LIM domain protein-coding  
chromodomain protein-coding  
tankyrase, protein-coding  
dystrobrevin protein-coding  
vacuolar protein-coding  
cyclin T2 protein-coding  
adaptor-receptor protein-coding  
amyloid-1,6 protein-coding  
trichohyalin protein-coding  
DnaJ (Hsp40) protein-coding  
leucine rich protein-coding  
membrane protein-coding  
sphingosin protein-coding  
DNA segment protein-coding  
deleted in 1 protein-coding  
F-box and 1 protein-coding  
ubiquitin-c protein-coding  
AT-hook transcription protein-coding  
low density protein-coding  
serine (or cysteine) protein-coding  
Ngfi-A binding protein-coding  
membrane protein-coding  
NADH dehydrogenase protein-coding  
sorting nexin protein-coding  
RIKEN cDNA protein-coding  
ezrin protein-coding  
cDNA sequence protein-coding  
immunity-related protein-coding  
inositol polyphosphate protein-coding  
DNA segment protein-coding  
A kinase (PK) protein-coding  
pituitary tumor protein-coding  
ribosomal protein-coding  
mitochondrial protein-coding  
diacylglycerol protein-coding  
surfactant protein-coding  
aminoacyl protein-coding  
biorientation protein-coding

vacuolar pr protein-coding  
transformii protein-coding  
cardiotropl protein-coding  
coiled-coil protein-coding  
motile spei protein-coding  
interferon protein-coding  
cytoskeletc protein-coding  
mucin 13, € protein-coding  
serine palm protein-coding  
asparagine protein-coding  
RELT tumo protein-coding  
BCL6 interc protein-coding  
protein phi protein-coding  
tet methylc protein-coding  
ring finger protein-coding  
cadherin 2: protein-coding  
UDP-Gal:b€ protein-coding  
TBC1 doma protein-coding  
tribbles ho protein-coding  
tubulin cof. protein-coding  
ubiquitin p protein-coding  
glycine clec protein-coding  
ELOVL fam protein-coding  
golgi reassc protein-coding  
secernin 3 protein-coding  
frizzled hor protein-coding  
leukemia ir protein-coding  
family with protein-coding  
homeobox protein-coding  
calpastatin protein-coding  
CAS1 doma protein-coding  
tubulin, alç protein-coding  
MAP kinasc protein-coding  
methyl-Cpç protein-coding  
N-acetyltra protein-coding  
autism susc protein-coding  
CDC16 cell protein-coding  
proteasom protein-coding  
serine/argi protein-coding  
histone clu protein-coding  
methyltran protein-coding  
G protein-c protein-coding  
UBX domai protein-coding  
tetratricop protein-coding  
H2A histon protein-coding  
RIKEN cDN. protein-coding  
zinc finger protein-coding

seven in ab protein-coding  
cyclin G ass protein-coding  
zinc finger protein-coding  
synaptone protein-coding  
methyltran protein-coding  
brain expre protein-coding  
glutamine i protein-coding  
lamin B rec protein-coding  
SLX4 intera protein-coding  
AE binding protein-coding  
tubulin, ga protein-coding  
family with protein-coding  
egl-9 famil protein-coding  
RIKEN cDN. protein-coding  
NHP2 ribor protein-coding  
tumor necr protein-coding  
armadillo r protein-coding  
ribosomal j protein-coding  
solute carri protein-coding  
coiled-coil i protein-coding  
sema domi protein-coding  
E2F transcr protein-coding  
Rho guanin protein-coding  
CD3 antige protein-coding  
syntaxin 1f protein-coding  
protease, s protein-coding  
DENN/MAI protein-coding  
plasminoge protein-coding  
coenzyme i protein-coding  
tumor prot protein-coding  
calcium/ca protein-coding  
Map3k7 C- protein-coding  
tescalcin protein-coding  
diaphanou: protein-coding  
integrator i protein-coding  
sin3 associ: protein-coding  
glutamine i protein-coding  
ankyrin re protein-coding  
serglycin protein-coding  
inner centr protein-coding  
lymphobla: protein-coding  
NUF2, NDC protein-coding  
olfactory r protein-coding  
heparan su protein-coding  
sprouty prc protein-coding  
limbic syst protein-coding  
nuclear tra protein-coding

family with protein-coding  
growth hor protein-coding  
nephronop protein-coding  
RAB11 fam protein-coding  
galactosylc protein-coding  
SMAD fami protein-coding  
T cell leuke protein-coding  
NOL1/NOP protein-coding  
small nucle protein-coding  
mitochond protein-coding  
olfactomec protein-coding  
ribosomal l protein-coding  
N-acetylglu protein-coding  
NIMA (nev protein-coding  
ubiquitin s1 protein-coding  
ribosomal j protein-coding  
family with protein-coding  
malonyl-Cc protein-coding  
ankyrin reç protein-coding  
polymerasç protein-coding  
splicing reg protein-coding  
regulating : protein-coding  
pleckstrin protein-coding  
mesoderm protein-coding  
mitochond protein-coding  
ubiquitin p protein-coding  
EBNA1 binç protein-coding  
aryl hydroc protein-coding  
Ras interac protein-coding  
ankyrin reç protein-coding  
family with protein-coding  
NCK-associ protein-coding  
transmemk protein-coding  
thrombom protein-coding  
annexin A3 protein-coding  
genetic suç protein-coding  
potassium protein-coding  
ubiquitin s1 protein-coding  
fibroblast ç protein-coding  
cyclin E2 protein-coding  
hect (homç protein-coding  
neuropilin protein-coding  
ecotropic v protein-coding  
actin-like 6 protein-coding  
tudor dom: protein-coding  
ELOVL fam protein-coding  
DIP2 disco- protein-coding

capping prc protein-coding  
male-speci protein-coding  
ubiquitin p protein-coding  
K(lysine) ac protein-coding  
phosphorit protein-coding  
polymerase protein-coding  
heterogene protein-coding  
transmemk protein-coding  
zinc finger, protein-coding  
recombina protein-coding  
leucine rich protein-coding  
ADP-ribosy protein-coding  
predicted g protein-coding  
gametoger protein-coding  
solute carri protein-coding  
zinc finger protein-coding  
nerve grow protein-coding  
cutC coppe protein-coding  
membrane protein-coding  
AT rich inte protein-coding  
SMC hinge protein-coding  
nuclear tra protein-coding  
KAT8 regul protein-coding  
calcium rel protein-coding  
zinc finger protein-coding  
Iroquois re protein-coding  
RAB24, me protein-coding  
nuclear fac protein-coding  
nudix (nucl protein-coding  
N-acetylne protein-coding  
tripeptidyl protein-coding  
HMG box d protein-coding  
H2.0-like h protein-coding  
KDEL (Lys-/ protein-coding  
S-adenosyl protein-coding  
apoptosis e protein-coding  
protein kin protein-coding  
Rho GTPas protein-coding  
TGF-beta a protein-coding  
chemokine protein-coding  
CD274 anti protein-coding  
meiosis arr protein-coding  
prosaposin protein-coding  
transmemk protein-coding  
coiled-coil protein-coding  
chromodor protein-coding  
glycosyltra protein-coding

YTH domai protein-coding  
SEC22 vesic protein-coding  
resistin like protein-coding  
WAS prote protein-coding  
LysM, puta protein-coding  
SEC22 vesic protein-coding  
nuclear rec protein-coding  
zinc finger protein-coding  
HERV-H LTI protein-coding  
B cell receç protein-coding  
olfactory rç protein-coding  
jun proto-c protein-coding  
eosinophil- protein-coding  
ankyrin reç protein-coding  
mediator c protein-coding  
carboxypeç protein-coding  
phosphodi protein-coding  
zinc finger, protein-coding  
UTP18, sm: protein-coding  
interferon protein-coding  
endothelin protein-coding  
acyl-Coenz protein-coding  
suppressor protein-coding  
solute carri protein-coding  
OTU domai protein-coding  
Sec24 relat protein-coding  
nuclear rec protein-coding  
RIKEN cDN. protein-coding  
signal trans protein-coding  
nicalin hor protein-coding  
gem (nucle protein-coding  
UDP-N-ace protein-coding  
RIKEN cDN. protein-coding  
H3 histone, protein-coding  
cell adhesi protein-coding  
potassium protein-coding  
nuclear fac protein-coding  
methyltran protein-coding  
zinc fingers protein-coding  
neuroligin : protein-coding  
gap junctio protein-coding  
chemokine protein-coding  
phosphatic protein-coding  
GLI pathog protein-coding  
TBC1 doma protein-coding  
parathyroi protein-coding  
myosin IIIA protein-coding



interferon protein-coding  
multiple EC protein-coding  
zinc finger protein-coding  
ATP-bindin protein-coding  
CART prepi protein-coding  
sine oculis- protein-coding  
canopy 2 h protein-coding  
CD2-associ protein-coding  
RIKEN cDN. protein-coding  
eukaryotic protein-coding  
UDP-N-ace protein-coding  
N-deacetyl protein-coding  
transducin protein-coding  
RIKEN cDN. protein-coding  
proteasom protein-coding  
transformii protein-coding  
LYR motif c protein-coding  
C-type lecti protein-coding  
exosome ci protein-coding  
Ewing tumi protein-coding  
dihydrolipc protein-coding  
glutamate protein-coding  
prenyl (sol; protein-coding  
raftlin fami protein-coding  
UBX domai protein-coding  
acidic (leuc protein-coding  
COX assem protein-coding  
transcriptic protein-coding  
regulation protein-coding  
hematopoi protein-coding  
RIKEN cDN. protein-coding  
neuroplast protein-coding  
NIMA (nevi protein-coding  
estrogen rε protein-coding  
adaptor-re protein-coding  
regulator o protein-coding  
calcium ch; protein-coding  
signal-indu protein-coding  
spermidine protein-coding  
ninein protein-coding  
B cell CLL/I' protein-coding  
v-maf musc protein-coding  
glycogen sy protein-coding  
LIM domaii protein-coding  
filamin bin; protein-coding  
spermidine protein-coding  
guanine nu protein-coding

nuclear fac protein-coding  
forkhead b protein-coding  
major facili protein-coding  
choline kin protein-coding  
zinc finger protein-coding  
solute carri protein-coding  
transmemk protein-coding  
peroxisom; protein-coding  
ariadne ub protein-coding  
engulfmen; protein-coding  
EGF-like m; protein-coding  
ribosomal j protein-coding  
coronin 7 protein-coding  
major vault protein-coding  
solute carri protein-coding  
spinstar ho protein-coding  
adiponectin protein-coding  
dihydropyr protein-coding  
tachykinin protein-coding  
small nucle protein-coding  
cytochrom; protein-coding  
lipoma HM protein-coding  
RIKEN cDN. protein-coding  
polyadenyl protein-coding  
protein ph; protein-coding  
PET112 ho; protein-coding  
CD300 anti protein-coding  
upstream k protein-coding  
glutamate- protein-coding  
LY6/PLAUR protein-coding  
PHD finger protein-coding  
N-terminal protein-coding  
dickkopf hc protein-coding  
trans-actin; protein-coding  
RIKEN cDN. protein-coding  
activin rece; protein-coding  
peroxisom; protein-coding  
karyopheri protein-coding  
IQ motif co protein-coding  
midasin ho protein-coding  
RNA bindin protein-coding  
zinc finger protein-coding  
ring finger protein-coding  
growth diff protein-coding  
eukaryotic protein-coding  
NTPase, KA protein-coding  
tensin 3 protein-coding

zinc finger protein-coding  
PH domain protein-coding  
actin relate protein-coding  
Kruppel-lik protein-coding  
La ribonucl protein-coding  
tripartite r protein-coding  
unc-80 hon protein-coding  
unc-51 like protein-coding  
calcium reę protein-coding  
WW domai protein-coding  
growth arrı protein-coding  
pyruvate dı protein-coding  
leucine rich protein-coding  
signal-indu protein-coding  
pyrophospl protein-coding  
ATP5S-like protein-coding  
transcriptic protein-coding  
JAZF zinc fi protein-coding  
protein phı protein-coding  
adenylate cı protein-coding  
ribosomal jı protein-coding  
period circı protein-coding  
major urinı protein-coding  
tRNA meth protein-coding  
Znrd1 antis protein-coding  
mutS homcı protein-coding  
DNA (cytos protein-coding  
multiple C2 protein-coding  
leukotrieneı protein-coding  
dachshund protein-coding  
ankyrin reęı protein-coding  
ADAMTS-lil protein-coding  
ribonucleoı protein-coding  
glutamate- protein-coding  
Rho GTPası protein-coding  
methionineı protein-coding  
CDC42 smaı protein-coding  
transmemkı protein-coding  
GTPase actı protein-coding  
interferonı protein-coding  
UTP6, smal protein-coding  
enhancer cı protein-coding  
tribbles hoı protein-coding  
phosphaticı protein-coding  
transmemkı protein-coding  
cell cycle pı protein-coding  
zinc finger protein-coding

cDNA sequ protein-coding  
MAP-kinas protein-coding  
hect (homc protein-coding  
cortexin 3 protein-coding  
deoxyhyphu protein-coding  
egl-9 family protein-coding  
CLOCK inte protein-coding  
ribophorin protein-coding  
actin filame protein-coding  
cathepsin E protein-coding  
homeobox protein-coding  
interleukin protein-coding  
frizzled hor protein-coding  
ankyrin re protein-coding  
TSC22 dom protein-coding  
myosin XVI protein-coding  
influenza v protein-coding  
cDNA sequ protein-coding  
speckle-ty protein-coding  
lscU iron-si protein-coding  
Hedgehog- protein-coding  
apolipopro protein-coding  
oxidation r protein-coding  
insulin-like protein-coding  
predicted g protein-coding  
RNA bindin protein-coding  
ribosomal j protein-coding  
Hermansky protein-coding  
spinster ho protein-coding  
protein tyr protein-coding  
transmemk protein-coding  
ribosomal j protein-coding  
membrane protein-coding  
protein tyr protein-coding  
unc-45 hor protein-coding  
ras respon protein-coding  
major facili protein-coding  
protein tyr protein-coding  
ectonucleo protein-coding  
minichrom protein-coding  
PAX intera protein-coding  
immunity-r protein-coding  
TatD DNAs protein-coding  
LSM6 homi protein-coding  
argonaute protein-coding  
activin rece protein-coding  
zinc finger, protein-coding

ribonucleo protein-coding  
SH3-domai protein-coding  
peroxisom; protein-coding  
BMP-bindir protein-coding  
death effec protein-coding  
phosphatic protein-coding  
Rho family protein-coding  
cleavage st protein-coding  
RIKEN cDN. protein-coding  
EF-hand ca protein-coding  
gasdermin protein-coding  
left-right di protein-coding  
xenotropic protein-coding  
amyloid be protein-coding  
cDNA sequ protein-coding  
hyperpolar protein-coding  
SHQ1 homi protein-coding  
beta-1,3-gl protein-coding  
kelch-like 2 protein-coding  
ubiquitin s; protein-coding  
low density protein-coding  
cystic fibro protein-coding  
actin, beta protein-coding  
pleckstrin protein-coding  
protein kin protein-coding  
chromodor protein-coding  
jun B proto protein-coding  
WD repeat protein-coding  
RNA bindin protein-coding  
transcriptic protein-coding  
coiled-coil protein-coding  
vacuolar pr protein-coding  
ubiquitin s; protein-coding  
potassium protein-coding  
inhibitor of protein-coding  
STE20-relat protein-coding  
solute carri protein-coding  
ribonucleic protein-coding  
guanylate c protein-coding  
BCL2-assoc protein-coding  
RIKEN cDN. protein-coding  
immunogl protein-coding  
SMAD fami protein-coding  
RIKEN cDN. protein-coding  
deleted in I protein-coding  
KxDL motif protein-coding  
dynein ligh protein-coding

RIKEN cDN. protein-coding  
interleukin protein-coding  
zinc finger protein-coding  
mutS homc protein-coding  
jun proto-c protein-coding  
5'-nucleoti protein-coding  
RIKEN cDN. protein-coding  
cytochrom protein-coding  
chromodor protein-coding  
recombina protein-coding  
transmemk protein-coding  
acyl-CoA sy protein-coding  
UDP-N-ace protein-coding  
phosphodi protein-coding  
dual specifi protein-coding  
RNA bindin protein-coding  
t-complex j protein-coding  
mitogen-ac protein-coding  
Ras associa protein-coding  
RNA bindin protein-coding  
G-rich RNA protein-coding  
MAP/micrc protein-coding  
phosphatic protein-coding  
regulator o protein-coding  
septin 14 protein-coding  
trans-2,3-e protein-coding  
solute carri protein-coding  
phospholip protein-coding  
minichrom protein-coding  
small nucle protein-coding  
6-phospho protein-coding  
chemokine protein-coding  
Rho GTPas protein-coding  
ubiquitin sj protein-coding  
Yip1 domai protein-coding  
Werner syr protein-coding  
sel-1 suppr protein-coding  
CCR4-NOT protein-coding  
peroxisom protein-coding  
SET domair protein-coding  
RIKEN cDN. protein-coding  
tribbles ho protein-coding  
Sfi1 homol protein-coding  
split hand/ protein-coding  
chemokine protein-coding  
FAST kinas protein-coding  
CD44 antig protein-coding

ATPase, Na protein-coding  
RIKEN cDN. protein-coding  
angiopoietin protein-coding  
OCIA domain protein-coding  
endothelin protein-coding  
ChaC, cation protein-coding  
carbohydrate protein-coding  
capping protein protein-coding  
cytochrome protein-coding  
polypyrimidine protein-coding  
cell division protein-coding  
hect domain protein-coding  
WD repeat protein-coding  
uridine motif protein-coding  
lysosomal protein-coding  
jumonji domain protein-coding  
neurobeachin protein-coding  
eukaryotic protein-coding  
interleukin protein-coding  
immediate protein-coding  
fibronectin protein-coding  
armadillo repeat protein-coding  
homeodomain protein-coding  
actin-binding protein-coding  
DnaJ (Hsp4) protein-coding  
family with protein-coding  
NADH dehydrogenase protein-coding  
zinc finger protein-coding  
KH domain protein-coding  
inositol polyphosphate protein-coding  
cyclin-dependent protein-coding  
RIKEN cDN. protein-coding  
podoplanin protein-coding  
MUS81 endonuclease protein-coding  
ferredoxin protein-coding  
zinc finger protein-coding  
GINS complex protein-coding  
runt related protein-coding  
alpha disintegrin protein-coding  
Rho GTPase protein-coding  
enhancer c protein-coding  
protein tyrosine protein-coding  
SH3 domain protein-coding  
ribosomal protein-coding  
TLR4 interaction protein-coding  
2-deoxyribose protein-coding  
potassium protein-coding

family with protein-coding  
family with protein-coding  
F-box and \ protein-coding  
transmemk protein-coding  
carbohydræ protein-coding  
cell adhesi protein-coding  
potassium protein-coding  
bromo adjæ protein-coding  
grancalcin protein-coding  
ATPase, cla protein-coding  
myelin basi protein-coding  
NADH dehy protein-coding  
ring finger protein-coding  
protein ph protein-coding  
interferon protein-coding  
phosphatic protein-coding  
coagulator protein-coding  
ribonuclea: protein-coding  
TRAF-inter: protein-coding  
ADP-ribosy protein-coding  
osteocrin protein-coding  
platelet-ac: protein-coding  
adaptor-re protein-coding  
heterogenæ protein-coding  
zinc finger protein-coding  
pleckstrin l protein-coding  
Bardet-Bie protein-coding  
G protein-c protein-coding  
paired imr protein-coding  
Moloney sæ protein-coding  
ring finger protein-coding  
staufen (R) protein-coding  
collagen, t) protein-coding  
ribosomal | protein-coding  
cell divisor protein-coding  
SWI/SNF re protein-coding  
interleukin protein-coding  
vitamin K e protein-coding  
ATP/GTP bi protein-coding  
T cell-inter: protein-coding  
plexin C1 protein-coding  
multivesicu protein-coding  
brain-speci protein-coding  
DDB1 and ( protein-coding  
additional : protein-coding  
olfactory re protein-coding  
sema domæ protein-coding



ArfGAP wit protein-coding  
thymosin, I protein-coding  
SET and M<sup>1</sup> protein-coding  
hepatocyte protein-coding  
cyclin C protein-coding  
transducin- protein-coding  
phosphofru protein-coding  
RNA bindin protein-coding  
glycine dec protein-coding  
NLR family, protein-coding  
synptosor protein-coding  
neurexin III protein-coding  
LIM domaii protein-coding  
lysine (K)-s protein-coding  
BCL6 interæ protein-coding  
leukotriene protein-coding  
ARV1 homc protein-coding  
potassium protein-coding  
E2F transcr protein-coding  
palmitoyl-ç protein-coding  
dynactin 1 protein-coding  
paired-like protein-coding  
glutathione protein-coding  
leucyl-tRN<sup>4</sup> protein-coding  
cyclin L1 protein-coding  
transforma protein-coding  
CDC14 cell protein-coding  
solute carri protein-coding  
mannoside protein-coding  
protein-L-is protein-coding  
ataxin 10 protein-coding  
IQ motif co protein-coding  
chloride ch protein-coding  
WD repeat protein-coding  
zinc finger protein-coding  
ENTH domi protein-coding  
transmemk protein-coding  
excision rej protein-coding  
squamous protein-coding  
serpine1 m protein-coding  
protein kin protein-coding  
nucleolar p protein-coding  
tumor necr protein-coding  
pecanex hc protein-coding  
complemei protein-coding  
taperin protein-coding  
ATP synth protein-coding

aryl-hydroc protein-coding  
ATPase, Ca protein-coding  
arginine/se protein-coding  
P450 (cyto protein-coding  
asparagine protein-coding  
neural prec protein-coding  
taste recep protein-coding  
RIKEN cDN. protein-coding  
LIM and SH protein-coding  
predicted  $\xi$  protein-coding  
endoplasm protein-coding  
GUF1 GTPa protein-coding  
met proto- protein-coding  
immediate protein-coding  
suppressio protein-coding  
RIKEN cDN. protein-coding  
dual specifi protein-coding  
gap junctio protein-coding  
zinc finger protein-coding  
excision rej protein-coding  
superoxide protein-coding  
follistatin-li protein-coding  
degenerati protein-coding  
NUAK fami protein-coding  
zinc finger protein-coding  
ORAI calciu protein-coding  
solute carri protein-coding  
Mdm2, tra protein-coding  
zinc finger, protein-coding  
DEAD (Asp- protein-coding  
forkhead b protein-coding  
zinc finger protein-coding  
interleukin protein-coding  
RIKEN cDN. protein-coding  
killer cell le protein-coding  
fibronectin protein-coding  
thiosulfate protein-coding  
solute carri protein-coding  
autophagy protein-coding  
proline-rich protein-coding  
RAS-like, fa protein-coding  
C-type lecti protein-coding  
predicted  $\xi$  protein-coding  
TBC1 doma protein-coding  
Pbx/knotte protein-coding  
phosphatic protein-coding  
calcium ho protein-coding

granzyme I protein-coding  
DiGeorge s protein-coding  
galactosida protein-coding  
C-type lecti protein-coding  
Smg-6 hom protein-coding  
cystatin 10 protein-coding  
zinc finger, protein-coding  
ubiquitin C protein-coding  
discs, large protein-coding  
growth arr protein-coding  
lysine (K)-s protein-coding  
bobby sox protein-coding  
coiled-coil protein-coding  
GRAM dom protein-coding  
solute carri protein-coding  
B cell trans protein-coding  
phosphodi protein-coding  
ATP-bindin protein-coding  
GINS comp protein-coding  
general tra protein-coding  
tRNA meth protein-coding  
CLPTM1-lik protein-coding  
solute carri protein-coding  
serine inco protein-coding  
zinc finger protein-coding  
UDP-glucos protein-coding  
cytochrom protein-coding  
lysophosph protein-coding  
IQ motif an protein-coding  
transcriptic protein-coding  
guanine nu protein-coding  
vacuolar pr protein-coding  
olfactomec protein-coding  
retinoic aci protein-coding  
Ras associa protein-coding  
protein ph protein-coding  
small integ protein-coding  
zinc finger protein-coding  
colony stim protein-coding  
protein pre protein-coding  
autophagy protein-coding  
transcriptic protein-coding  
A kinase (P protein-coding  
Rho-relate protein-coding  
peptidylprc protein-coding  
orofacial cl protein-coding  
5' nucleotic protein-coding

protein tyri protein-coding  
LPS-induce protein-coding  
transmemk protein-coding  
phospholip protein-coding  
GTPase act protein-coding  
LIM domaii protein-coding  
ribosomal l protein-coding  
nardilysin, protein-coding  
calpain 8 protein-coding  
SECIS bindi protein-coding  
Rho GTPas protein-coding  
killer cell le protein-coding  
KRR1, smal protein-coding  
melanoreg protein-coding  
prothymos protein-coding  
transducer protein-coding  
ATPase, Ca protein-coding  
netrin G1 protein-coding  
zinc finger protein-coding  
lysine (K)-s protein-coding  
zinc finger protein-coding  
DEAD (Asp- protein-coding  
transcriptic protein-coding  
PTK2 prote protein-coding  
NLR family, protein-coding  
sortilin 1 protein-coding  
nuclear fac protein-coding  
polycomb ξ protein-coding  
proprotein protein-coding  
cms small r protein-coding  
SET domair protein-coding  
cyclin-depe protein-coding  
ribosomal j protein-coding  
cadherin 1: protein-coding  
B cell CLL/l protein-coding  
myocardial protein-coding  
2-phospho: protein-coding  
prostaglan protein-coding  
metastasis- protein-coding  
family with protein-coding  
cadherin 2: protein-coding  
structure s protein-coding  
cyclic nucle protein-coding  
glia matura protein-coding  
suppressor protein-coding  
ring finger protein-coding  
interleukin protein-coding

S100 calciu protein-coding  
mannosida protein-coding  
somatostat protein-coding  
ribosomal  $\mu$  protein-coding  
WD repeat protein-coding  
neural prec protein-coding  
phosphoin protein-coding  
adenosine protein-coding  
translocate protein-coding  
regulator o protein-coding  
proteasom protein-coding  
CD81 antig protein-coding  
RIKEN cDN. protein-coding  
phosphatic protein-coding  
kelch-like E protein-coding  
chemokine protein-coding  
phosphodi protein-coding  
phosphodi protein-coding  
fos-like ant protein-coding  
interleukin protein-coding  
zinc finger, protein-coding  
zinc finger protein-coding  
nucleopori protein-coding  
chondroitir protein-coding  
interleukin protein-coding  
poly(A) bin protein-coding  
RuvB-like p protein-coding  
mitogen-ac protein-coding  
predicted  $\xi$  protein-coding  
RAD51 hon protein-coding  
deformed  $\epsilon$  protein-coding  
ribosomal  $\mu$  protein-coding  
solute carri protein-coding  
cyclin E1 protein-coding  
mitochond protein-coding  
family with protein-coding  
anterior gr: protein-coding  
dCMP dear protein-coding  
RCSD dom $\epsilon$  protein-coding  
RIKEN cDN. protein-coding  
small nucle protein-coding  
NHL repeat protein-coding  
BCL2-assoc protein-coding  
otogelin-lik protein-coding  
ubiquitin-c protein-coding  
CDC14 cell protein-coding  
thymocyte protein-coding

zinc finger protein-coding  
anaphase  $\zeta$  protein-coding  
ATPase, cla protein-coding  
PARK2 co-r protein-coding  
NADH dehyd protein-coding  
ankyrin re $\zeta$  protein-coding  
cornichon l protein-coding  
coiled-coil  $\mu$  protein-coding  
selenophos protein-coding  
transporter protein-coding  
E74-like fac protein-coding  
low density protein-coding  
neurogenin protein-coding  
DDB1 and  $\epsilon$  protein-coding  
solute carrier protein-coding  
eukaryotic protein-coding  
cysteine-rich protein-coding  
RIKEN cDN. protein-coding  
density-reg protein-coding  
DNA segme $\epsilon$  protein-coding  
ribosomal  $\mu$  protein-coding  
RAN binding protein-coding  
adrenergic protein-coding  
2-oxoglutarate protein-coding  
metallothionein protein-coding  
sushi, von  $\mu$  protein-coding  
cadherin 4 protein-coding  
zinc finger protein-coding  
regulator of protein-coding  
telomerase protein-coding  
mastermin protein-coding  
Rho guanine protein-coding  
leucine-rich protein-coding  
ADP-ribosyl protein-coding  
OTU domain protein-coding  
zinc finger protein-coding  
ArfGAP with protein-coding  
integrin  $\alpha$  protein-coding  
transmembrane protein-coding  
t-complex  $\mu$  protein-coding  
sphingosin protein-coding  
crystallin,  $\epsilon$  protein-coding  
actin filament protein-coding  
N(alpha)-ac protein-coding  
alkylglycerol protein-coding  
mediator c protein-coding  
phospholipid protein-coding

coenzyme i protein-coding  
2-oxogluta protein-coding  
solute carri protein-coding  
dystroglyca protein-coding  
transmemk protein-coding  
coagulator protein-coding  
transaldola protein-coding  
tetratricop protein-coding  
aldehyde d protein-coding  
nucleic acic protein-coding  
ATP-bindin protein-coding  
solute carri protein-coding  
protein kin protein-coding  
centrosom. protein-coding  
NOP2 nucl protein-coding  
glycosyltra protein-coding  
Ral GTPase protein-coding  
serine/argi protein-coding  
nuclear fac protein-coding  
cortactin protein-coding  
B cell leuke protein-coding  
SUN domai protein-coding  
BCDIN3 do protein-coding  
nucleopori protein-coding  
fibronectin protein-coding  
pentatrico protein-coding  
COMM dor protein-coding  
neutrophil protein-coding  
SECIS bindi protein-coding  
septin 9 protein-coding  
FMS-like ty protein-coding  
CD300 anti protein-coding  
tRNA splici protein-coding  
Rho GTPas protein-coding  
dedicator c protein-coding  
predicted g protein-coding  
coxsackie v protein-coding  
zinc finger protein-coding  
4-hydroxy protein-coding  
eukaryotic protein-coding  
phosphodi protein-coding  
potassium protein-coding  
mitochond protein-coding  
melatonin protein-coding  
Nedd4 fam protein-coding  
mitochond protein-coding  
nucleotide. protein-coding

prostaglandin synthase protein-coding  
ankyrin repeat domain protein-coding  
DNA segment protein-coding  
avian muscle protein-coding  
tripartite repeat protein-coding  
mitochondrial protein-coding  
dual-specific protein-coding  
SR-related protein-coding  
coiled-coil protein-coding  
glutamic protein-coding  
calumenin protein-coding  
forkhead box protein-coding  
F-box and protein-coding  
Jun dimerization protein-coding  
synaptotagmin protein-coding  
cyclin A1 protein-coding  
carboxypeptidase protein-coding  
nuclear factor protein-coding  
NLR family protein-coding  
neurofilament protein-coding  
ATP-binding protein-coding  
Rho guanine nucleotide exchange factor protein-coding  
glutamate receptor protein-coding  
diacylglycerol protein-coding  
CDK5 regulatory subunit protein-coding  
F-box and protein-coding  
egl-9 family protein-coding  
Rho-related protein-coding  
splicing factor protein-coding  
solute carrier protein-coding  
euchromatin protein-coding  
tudor domain protein-coding  
AT hook, domain protein-coding  
testis expressed protein-coding  
lectin, galactose-binding protein-coding  
inositol 1,4-bisphosphate 3-kinase protein-coding  
solute carrier protein-coding  
UHRF1 (ICE1) protein-coding  
RAN, membrane-associated protein-coding  
galanin protein-coding  
solute carrier protein-coding  
polymerase protein-coding  
membrane protein-coding  
influenza virus protein-coding  
guanine nucleotide exchange factor protein-coding  
calsynenin protein-coding  
K(lysine) acetyltransferase protein-coding



bone marr protein-coding  
Hedgehog- protein-coding  
ORAI calciu protein-coding  
N(alpha)-a protein-coding  
bromodom protein-coding  
CUB and Sc protein-coding  
sphingosin protein-coding  
jade family protein-coding  
nuclear tra protein-coding  
zinc finger protein-coding  
zinc finger protein-coding  
zinc finger protein-coding  
piezo-type protein-coding  
transketolase protein-coding  
FK506 bind protein-coding  
CD38 antig protein-coding  
DENN/MAI protein-coding  
WD repeat protein-coding  
X-ray repai protein-coding  
zinc finger protein-coding  
gelsolin protein-coding  
E26 avian l protein-coding  
rhotekin 2 protein-coding  
OTU domai protein-coding  
caspase 2 protein-coding  
WD repeat protein-coding  
tribbles ho protein-coding  
alkylglycer protein-coding  
zinc finger protein-coding  
COX20 Cox protein-coding  
vacuolar pr protein-coding  
RIKEN cDN. protein-coding  
cofilin 1, nc protein-coding  
nuclear rec protein-coding  
interleukin protein-coding  
dedicator c protein-coding  
neuron der protein-coding  
claudin 15 protein-coding  
adenosine protein-coding  
spermatog protein-coding  
phosphata: protein-coding  
sorting nex protein-coding  
DnaJ (Hsp4 protein-coding  
spectrin re protein-coding  
spleen focu protein-coding  
UDP-GlcNA protein-coding  
forkhead b protein-coding

phosphata: protein-coding  
thrombosp protein-coding  
diaphanou: protein-coding  
inhibitor of protein-coding  
rhomboid 5 protein-coding  
RIKEN cDN. protein-coding  
WD repeat protein-coding  
solute carri protein-coding  
protein ph protein-coding  
paired box protein-coding  
arginyltran protein-coding  
angiotensir protein-coding  
ubiquitin p protein-coding  
ankyrin re protein-coding  
NEDD4 bin protein-coding  
zinc finger protein-coding  
pyrophospl protein-coding  
proteasom protein-coding  
migration 2 protein-coding  
immediate protein-coding  
CTD (carbo protein-coding  
crystallin, z protein-coding  
protein tyr protein-coding  
PRAME fan protein-coding  
coiled-coil protein-coding  
UV radiatic protein-coding  
Myb/SANT protein-coding  
SMAD fami protein-coding  
zinc finger protein-coding  
ankyrin re protein-coding  
Rho GTPas protein-coding  
caspase 1 protein-coding  
CUE domai protein-coding  
NEDD4 bin protein-coding  
hexamethy protein-coding  
thrombom protein-coding  
transmemk protein-coding  
sortilin-rel protein-coding  
BMP and a protein-coding  
leptin rece protein-coding  
endo-beta- protein-coding  
janus kinas protein-coding  
salt inducit protein-coding  
YEATS dom protein-coding  
methylster protein-coding  
glucoside x protein-coding  
G protein-c protein-coding

glial cells r protein-coding  
tyrosine 3-i protein-coding  
expressed : protein-coding  
developme protein-coding  
myosin, he protein-coding  
zinc finger protein-coding  
H3 histone protein-coding  
angiopoieti protein-coding  
sestrin 3 protein-coding  
suppressor protein-coding  
ribosomal j protein-coding  
growth arr protein-coding  
eukaryotic protein-coding  
SRY (sex de protein-coding  
UFM1-spec protein-coding  
Nipped-B h protein-coding  
akirin 2 protein-coding  
exportin, tf protein-coding  
golgi appar protein-coding  
transmemk protein-coding  
thymoma v protein-coding  
mitogen-ac protein-coding  
killer cell le protein-coding  
family with protein-coding  
myotubula protein-coding  
ubiquitin sj protein-coding  
SUMO/sen protein-coding  
adenylosuc protein-coding  
RIKEN cDN. protein-coding  
GDP-mann protein-coding  
placenta e protein-coding  
haptoglobi protein-coding  
nucleopori protein-coding  
ubiquitin-c protein-coding  
zinc finger protein-coding  
axin 1 protein-coding  
DENN/MAI protein-coding  
S100 calciu protein-coding  
PTC7 prote protein-coding  
myosin, he protein-coding  
RIKEN cDN. protein-coding  
phorbol-12 protein-coding  
Fc receptor protein-coding  
abhydrolas protein-coding  
ras homolc protein-coding  
ring finger protein-coding  
insulin rece protein-coding

proprotein protein-coding  
NCK-associ protein-coding  
aquaporin protein-coding  
C-type lecti protein-coding  
TRAF-inter; protein-coding  
predicted g protein-coding  
leucine zipj protein-coding  
eukaryotic protein-coding  
ribosomal i protein-coding  
THUMP do protein-coding  
transmemk protein-coding  
zinc finger protein-coding  
C-type lecti protein-coding  
heat shock protein-coding  
KAT8 regul protein-coding  
TruB pseud protein-coding  
thyrotroph protein-coding  
Ras-like wii protein-coding  
transforme protein-coding  
solute carri protein-coding  
TBC1 domæ protein-coding  
acyl-Coenz' protein-coding  
crumbs hoi protein-coding  
muscleblin protein-coding  
fucosyltran protein-coding  
chitinase-li protein-coding  
acyl-Coenz' protein-coding  
sorcini protein-coding  
DEAD (Asp- protein-coding  
large tumo protein-coding  
dynactin 4 protein-coding  
monocyte i protein-coding  
BCL2-like 1 protein-coding  
dehydroge protein-coding  
family with protein-coding  
family with protein-coding  
zinc finger protein-coding  
zinc finger protein-coding  
phosphatic protein-coding  
arginyl ami protein-coding  
integrin be protein-coding  
uncoupling protein-coding  
phosphopr protein-coding  
muscleblin protein-coding  
NIMA (nev protein-coding  
RIKEN cDN. protein-coding  
mediator c protein-coding

cornichon I protein-coding  
plexin D1 protein-coding  
CGG triplet protein-coding  
T cell, imm protein-coding  
Rap guanin protein-coding  
tumor necr protein-coding  
transmemk protein-coding  
PHD finger protein-coding  
ferric-chela protein-coding  
coiled-coil protein-coding  
proline-rich protein-coding  
2-phospho: protein-coding  
WAP four-c protein-coding  
myosin, he protein-coding  
SCAN dom: protein-coding  
aspartyl-tR protein-coding  
SWI/SNF re protein-coding  
DCN1, defe protein-coding  
X Kell bloo protein-coding  
platelet-aci protein-coding  
zinc finger, protein-coding  
X-ray repai protein-coding  
CD302 anti protein-coding  
SWA-70 pr protein-coding  
DnaJ (Hsp4 protein-coding  
UTP23, sm: protein-coding  
zinc finger protein-coding  
calcium/ca protein-coding  
ELAV (emb protein-coding  
stromal int protein-coding  
G protein-c protein-coding  
nuclear rec protein-coding  
nudix (nucl protein-coding  
ATP-bindin protein-coding  
transcriptic protein-coding  
mitochond protein-coding  
solute carri protein-coding  
fucosyltran protein-coding  
ring finger protein-coding  
osteoglycir protein-coding  
purinergic protein-coding  
RIKEN cDN. protein-coding  
leucyl/cysti protein-coding  
plasminoge protein-coding  
radical S-ac protein-coding  
ras homolc protein-coding  
tumor necr protein-coding

LYR motif c protein-coding  
nibrin protein-coding  
ubiquitin p protein-coding  
NADH dehydrogenase protein-coding  
dual serine protein-coding  
origin recognition complex protein-coding  
HemK methyltransferase protein-coding  
lin-7 homolog protein-coding  
transmembrane protein-coding  
iron-sulfur protein-coding  
prostaglandin synthase protein-coding  
lectin, galactose-binding protein-coding  
mitogen-activated protein kinase protein-coding  
interferon receptor protein-coding  
carboxypeptidase protein-coding  
forty-two kDa protein-coding  
tyrosyl-tRNA synthetase protein-coding  
zinc finger protein-coding  
cytochrome protein-coding  
ribose 5-phosphate protein-coding  
TEL2, telomerase protein-coding  
sciellin protein-coding  
insulin-like growth factor protein-coding  
karyopherin protein-coding  
myristoylated protein-coding  
G protein-coupled protein-coding  
pyruvate dehydrogenase protein-coding  
S100 calcium-binding protein-coding  
doublesex protein-coding  
acyl-CoA thioesterase protein-coding  
cortactin b protein-coding  
parathyroid hormone protein-coding  
7-dehydroxycorticosterone protein-coding  
glycerophosphorylcholine protein-coding  
catenin (cadherin-associated) protein-coding  
jade family protein-coding  
protein tyrosine phosphatase protein-coding  
xanthine dehydrogenase protein-coding  
WD repeat protein-coding  
autophagy protein-coding  
mex3 homolog protein-coding  
protein tyrosine phosphatase protein-coding  
gamma-secretase protein-coding  
G protein-coupled protein-coding  
bromodomain protein-coding  
DnaJ (Hsp40) protein-coding  
family with protein-coding

cytidine mcp protein-coding  
signal trans protein-coding  
non-catalyt protein-coding  
D-2-hydrox protein-coding  
coiled-coil protein-coding  
SH2 domai protein-coding  
ribonuclea protein-coding  
protein tyr protein-coding  
transducin protein-coding  
solute carri protein-coding  
proline syn protein-coding  
non-SMC c protein-coding  
UV radiatic protein-coding  
protease, s protein-coding  
LSM6 homi protein-coding  
ring finger protein-coding  
barrier to a protein-coding  
proline del protein-coding  
EH domain protein-coding  
ring finger protein-coding  
REV1 homi protein-coding  
AT rich inte protein-coding  
kinesin far protein-coding  
arginine glu protein-coding  
leucine rich protein-coding  
heat shock protein-coding  
IQ motif co protein-coding  
latrophilin protein-coding  
solute carri protein-coding  
signal reco protein-coding  
tubulin, al protein-coding  
glycine C-a protein-coding  
peroxiredo protein-coding  
peroxisom protein-coding  
jade family protein-coding  
heterogen protein-coding  
interleukin protein-coding  
F-box prote protein-coding  
OVO homo protein-coding  
transmemk protein-coding  
CCZ1 vacuc protein-coding  
sphingomy protein-coding  
calcium ani protein-coding  
RIKEN cDN. protein-coding  
protease, s protein-coding  
ATPase, H+ protein-coding  
hematopoi protein-coding

a disintegri protein-coding  
myozenin 1 protein-coding  
signal trans protein-coding  
C-terminal protein-coding  
monocyte 1 protein-coding  
ring-box 1 protein-coding  
nuclear rec protein-coding  
proteasom protein-coding  
MTOR asso protein-coding  
guanine m protein-coding  
fin bud init protein-coding  
phosphatic protein-coding  
GTP cycloh protein-coding  
X Kell blood protein-coding  
ERO1-like ( protein-coding  
RNA bindin protein-coding  
cytochrom protein-coding  
Abelson he protein-coding  
glutamate protein-coding  
transcriptic protein-coding  
Cbp/p300-i protein-coding  
muscle glyc protein-coding  
coiled-coil protein-coding  
COMM dor protein-coding  
chromodor protein-coding  
mitochond protein-coding  
Rho GTPas protein-coding  
serine (or c protein-coding  
casein kina protein-coding  
WAP four-c protein-coding  
nicotinami protein-coding  
THO compl protein-coding  
karyopheri protein-coding  
guanine de protein-coding  
protease, s protein-coding  
acyl-Coenz protein-coding  
AP2 associ protein-coding  
gem (nucle protein-coding  
kinectin 1 protein-coding  
LEM domai protein-coding  
Kruppel-lik protein-coding  
CDC42 effe protein-coding  
expressed : protein-coding  
regulator o protein-coding  
MOK prote protein-coding  
cAMP resp protein-coding  
TBC1 domæ protein-coding



PAP associ protein-coding  
TAF5-like R protein-coding  
CCR4-NOT protein-coding  
FGFR1 onco protein-coding  
potassium protein-coding  
pyruvate de protein-coding  
ankyrin repeat protein-coding  
RIKEN cDNA protein-coding  
leiomodulin protein-coding  
general transcription protein-coding  
ubiquitin-conjugating protein-coding  
zinc finger protein-coding  
polynucleotide protein-coding  
transmembrane protein-coding  
baculoviral protein-coding  
sushi domain protein-coding  
poly(rC) binding protein-coding  
CCCTC-binding protein-coding  
vomeronasal protein-coding  
solute carrier protein-coding  
exocyst core protein-coding  
ATP-binding protein-coding  
protein arginine protein-coding  
otolin 1 homolog protein-coding  
coiled-coil protein-coding  
Y box protein-coding  
X-box binding protein-coding  
lipoyl(octanoyl) protein-coding  
tetraatricoprotein-coding  
family with protein-coding  
selenophosphate protein-coding  
S-adenosyl protein-coding  
chromodomain protein-coding  
bone morphogenetic protein-coding  
poly (ADP-ribose) protein-coding  
serpine1 mouse protein-coding  
acyl-CoA synthetase protein-coding  
ets variant protein-coding  
ATPase, H<sup>+</sup> protein-coding  
CDC42 effector protein-coding  
v-maf musculo protein-coding  
oxysterol binding protein-coding  
prothymosin protein-coding  
nuclear receptor protein-coding  
MOB kinase protein-coding  
purinergic protein-coding  
AF4/FMR2 protein-coding

runt relate protein-coding  
ring finger protein-coding  
myelin basi protein-coding  
solute carri protein-coding  
solute carri protein-coding  
importin 1: protein-coding  
jagunal hor protein-coding  
YY1 transcr protein-coding  
zinc finger protein-coding  
Aly/REF ex protein-coding  
SCY1-like 3 protein-coding  
ubiquitin s protein-coding  
supervillin protein-coding  
UDP-GlcNA protein-coding  
transcriptic protein-coding  
N-acetyglu protein-coding  
activating t protein-coding  
phosphatid protein-coding  
prostaglan protein-coding  
kelch-like 2 protein-coding  
zinc finger protein-coding  
nuclear fac protein-coding  
TNF recept protein-coding  
LPS-respon protein-coding  
nuclear poi protein-coding  
trans-actin protein-coding  
dynein, axc protein-coding  
notch 2 protein-coding  
interleukin protein-coding  
transmemk protein-coding  
family with protein-coding  
RIKEN cDN. protein-coding  
RAB22A, m protein-coding  
DDB1 and ( protein-coding  
Kruppel-lik protein-coding  
FCH domai protein-coding  
NOL1/NOP protein-coding  
cadherin, E protein-coding  
vitamin K e protein-coding  
enoyl Coen protein-coding  
elastin mic protein-coding  
RIKEN cDN. protein-coding  
mitochond protein-coding  
cathepsin z protein-coding  
secretin rei protein-coding  
AT hook co protein-coding  
calcium rel protein-coding

vaccinia rel protein-coding  
sprouty-rel protein-coding  
TRM5 tRNA<sup>Leu</sup> protein-coding  
ribosomal l1 protein-coding  
nicotinamidase protein-coding  
casein kinase II protein-coding  
ubiquitin S1 protein-coding  
LanC (bacterial) protein-coding  
family with protein-coding  
transmembrane protein-coding  
calcium channel protein-coding  
F-box and 1 protein-coding  
Luc7 homo protein-coding  
CXADR-like protein-coding  
ADP-ribosylase protein-coding  
family with protein-coding  
cell division protein-coding  
apolipoprotein protein-coding  
RIKEN cDNA protein-coding  
insulin degradation protein-coding  
intraflagellar protein-coding  
cyclin-dependent protein-coding  
kinesin light protein-coding  
lysozyme 2 protein-coding  
castor zinc protein-coding  
phosphatidyl protein-coding  
BMS1 hom protein-coding  
zinc finger protein-coding  
prothymosin protein-coding  
oxysterol binding protein-coding  
ArfGAP with protein-coding  
glutamate protein-coding  
inositol 1,4 protein-coding  
ataxin 2 protein-coding  
transducin protein-coding  
carbohydrate protein-coding  
cyclin N-terminal protein-coding  
forkhead b protein-coding  
calcium annexin protein-coding  
RMI1, RecC protein-coding  
lysine (K)-specific protein-coding  
Rap guanine protein-coding  
hemochromin protein-coding  
atonal homolog protein-coding  
ubiquitin S1 protein-coding  
vasodilator protein-coding  
homeobox protein-coding

pleckstrin l protein-coding  
early endo: protein-coding  
N-myc dow protein-coding  
ribosomal l protein-coding  
LIM domai protein-coding  
FH2 domai protein-coding  
retinoblast protein-coding  
mal, T cell ( protein-coding  
nuclear rec protein-coding  
phospholip protein-coding  
CD36 antig protein-coding  
N-acetyglu protein-coding  
Rho guanin protein-coding  
UDP-Gal:be protein-coding  
glucocortic protein-coding  
DnaJ (Hsp4 protein-coding  
vacuolar pr protein-coding  
solute carri protein-coding  
coiled-coil ( protein-coding  
mastermin protein-coding  
potassium ( protein-coding  
signal trans: protein-coding  
peroxisom( protein-coding  
phosphoin( protein-coding  
actin filam( protein-coding  
phosphata: protein-coding  
protein kin protein-coding  
chaperonir protein-coding  
syntaxin bi protein-coding  
solute carri protein-coding  
dihydrolipc protein-coding  
zinc finger ( protein-coding  
scavenger ( protein-coding  
suppressor protein-coding  
dihydrouri( protein-coding  
integrator ( protein-coding  
solute carri protein-coding  
RIKEN cDN. protein-coding  
intraflagell. protein-coding  
ataxin 7-lik protein-coding  
ubiquitin-c( protein-coding  
high mobili protein-coding  
SUMO1/se protein-coding  
signal-indu protein-coding  
muscleblin( protein-coding  
adaptor pr( protein-coding  
hydroxyste protein-coding

KN motif ai protein-coding  
Tctex1 don protein-coding  
K(lysine) ac protein-coding  
diazepam k protein-coding  
tetratricop protein-coding  
serine/thre protein-coding  
aldo-keto r protein-coding  
leucine rich protein-coding  
zinc finger protein-coding  
thiosulfate protein-coding  
teneurin tr protein-coding  
chondroitin protein-coding  
DEP domain protein-coding  
phospholip protein-coding  
guanine nu protein-coding  
DEAH (Asp- protein-coding  
solute carrier protein-coding  
ras response protein-coding  
forkhead b protein-coding  
zinc finger protein-coding  
ribosomal j protein-coding  
chloride ch protein-coding  
EF-hand ca protein-coding  
solute carrier protein-coding  
chemokine protein-coding  
zinc finger protein-coding  
PHD finger protein-coding  
heart and r protein-coding  
syntaxin bi protein-coding  
DNA methyl protein-coding  
spermatog protein-coding  
ribosomal j protein-coding  
protein ph protein-coding  
cyclin-depe protein-coding  
oxysterol b protein-coding  
paired-like protein-coding  
PHD finger protein-coding  
WD repeat protein-coding  
K(lysine) ac protein-coding  
small nucle protein-coding  
bradykinin protein-coding  
charged mi protein-coding  
topoisome protein-coding  
latrophilin protein-coding  
Kruppel-like protein-coding  
UDP-glucur protein-coding  
leucine-rich protein-coding

integrin-lin protein-coding  
protease, s protein-coding  
genetic suꝑ protein-coding  
leucine zipꝑ protein-coding  
Pigy upstre protein-coding  
aldehyde d protein-coding  
histone clu protein-coding  
ATP/GTP bi protein-coding  
GLTSCR1-lil protein-coding  
cache dom protein-coding  
heat shock protein-coding  
family with protein-coding  
abhydrolas protein-coding  
ZXD family protein-coding  
low density protein-coding  
protein phꝑ protein-coding  
phosphata: protein-coding  
protein phꝑ protein-coding  
Rap guanin protein-coding  
nucleopori protein-coding  
glycogenin protein-coding  
tropomyos protein-coding  
ubiquitin C protein-coding  
basic leucir protein-coding  
mitochond protein-coding  
spleen focꝑ protein-coding  
diacylglyce protein-coding  
trafficking ꝑ protein-coding  
transformii protein-coding  
X-ray repai protein-coding  
potassium protein-coding  
myotubula protein-coding  
leucine rich protein-coding  
NLR family, protein-coding  
retinitis pig protein-coding  
PDZ and LII protein-coding  
translocase protein-coding  
ELAV (emb protein-coding  
SHQ1 homꝑ protein-coding  
nuclear rec protein-coding  
protocadheꝑ protein-coding  
speedy hor protein-coding  
target of m protein-coding  
A kinase (P protein-coding  
solute carri protein-coding  
complemei protein-coding  
ubiquitin p protein-coding

Smad nucle protein-coding  
homeodon protein-coding  
formin-like protein-coding  
Ras and Ra protein-coding  
tripartite r protein-coding  
CD33 antig protein-coding  
retinoic aci protein-coding  
acidic (leuc protein-coding  
TGFB-induc protein-coding  
inositol pol protein-coding  
solute carri protein-coding  
DENN/MAI protein-coding  
proline-rich protein-coding  
zinc finger, protein-coding  
ribosomal j protein-coding  
ninein protein-coding  
cyclin-depe protein-coding  
nuclear fac protein-coding  
ribonuclea: protein-coding  
cell divisior protein-coding  
AT hook co protein-coding  
succinyl-Cc protein-coding  
membrane protein-coding  
talin 1 protein-coding  
tripartite r protein-coding  
C-type lecti protein-coding  
calcium ho protein-coding  
RIKEN cDN. protein-coding  
glycerol ph protein-coding  
homeodon protein-coding  
ADAMTS-lil protein-coding  
mitochond protein-coding  
ring finger protein-coding  
mannoside protein-coding  
kinesin far protein-coding  
sulfatase r protein-coding  
kelch-like 6 protein-coding  
CART prep protein-coding  
CCR4-NOT protein-coding  
glycoprotei protein-coding  
GLIS family protein-coding  
phospholip protein-coding  
translocase protein-coding  
Ewing sarc protein-coding  
transforme protein-coding  
oxidized lo protein-coding  
potassium protein-coding

cadherin 6 protein-coding  
TBC1 domain protein-coding  
RIKEN cDN. protein-coding  
NADH dehydrogenase protein-coding  
ribosomal protein-coding  
component protein-coding  
family with protein-coding  
torsin A intron protein-coding  
signal-regulatory protein-coding  
acyl-CoA synthetase protein-coding  
cathepsin C protein-coding  
TBC1 domain protein-coding  
RNA binding protein-coding  
ribonucleoprotein protein-coding  
proteasome protein-coding  
required for protein-coding  
period circadian protein-coding  
procollagen protein-coding  
serine (or cysteine) protein-coding  
lysine (K)-rich protein-coding  
cadherin 1 protein-coding  
TRAF family protein-coding  
hook homology protein-coding  
septin 9 protein-coding  
zinc finger protein-coding  
carbonyl reductase protein-coding  
thyroid hormone protein-coding  
lymphoid enhancer protein-coding  
cerebral calcium protein-coding  
family with protein-coding  
DENN/MAL protein-coding  
leukocyte receptor protein-coding  
kinesin family protein-coding  
jade family protein-coding  
Cbp/p300-interacting protein-coding  
G protein-coupled protein-coding  
glutamine synthetase protein-coding  
M phase promoting protein-coding  
MICAL-like protein-coding  
TBC1 domain protein-coding  
cell division protein-coding  
rearranged protein-coding  
centrosome protein-coding  
UDP-Galactose 4-epimerase protein-coding  
cyclin G associated protein-coding  
HECT domain protein-coding  
RIKEN cDN. protein-coding



coiled-coil protein-coding  
Shc SH2-domain protein-coding  
tubulin tyrosine protein-coding  
E74-like factor protein-coding  
centromere protein-coding  
tRNA asparagine protein-coding  
transmembrane protein-coding  
striatin integrin protein-coding  
transient receptor protein-coding  
protein phosphatase protein-coding  
PR domain protein-coding  
insulin-like protein-coding  
transient receptor protein-coding  
RUN and F-box protein-coding  
vav 2 oncogene protein-coding  
HOP homeobox protein-coding  
a disintegrin protein-coding  
spectrin repeat protein-coding  
family with protein-coding  
neutrophil protein-coding  
transcription protein-coding  
furin (paired) protein-coding  
nicotinamide protein-coding  
Ral GTPase protein-coding  
inhibitor of protein-coding  
maturin, nuclear protein-coding  
RAS related protein-coding  
ATPase type protein-coding  
forkhead box protein-coding  
RIMS binding protein-coding  
serine (or cysteine) protein-coding  
transforming protein-coding  
transmembrane protein-coding  
Smith-Magenheim protein-coding  
transmembrane protein-coding  
glutamyl-tRNA protein-coding  
interferon protein-coding  
tubulin, gamma protein-coding  
LIM domain protein-coding  
dehydrogenase protein-coding  
potassium protein-coding  
calyculin binding protein-coding  
integrin beta protein-coding  
zinc finger, protein-coding  
G patch domain protein-coding  
tetraatricoprotein protein-coding  
retinol dehydrogenase protein-coding

tumor necr protein-coding  
BCL2-like 1 protein-coding  
protein kin protein-coding  
dual adapt protein-coding  
utrophin protein-coding  
prickle hon protein-coding  
DEAH (Asp) protein-coding  
apelin rece protein-coding  
survival mc protein-coding  
adducin 3 ( protein-coding  
stefin A1 protein-coding  
Ras homolc protein-coding  
Hus1 homc protein-coding  
zinc finger protein-coding  
myosin, ligl protein-coding  
methyltran protein-coding  
tetraspanir protein-coding  
calcineurin protein-coding  
interferon protein-coding  
RNA bindin protein-coding  
amyloid be protein-coding  
rabaptin, R protein-coding  
neuregulin protein-coding  
K(lysine) ac protein-coding  
serglycin protein-coding  
solute carri protein-coding  
interleukin protein-coding  
transmemt protein-coding  
histamine I protein-coding  
ras homolc protein-coding  
ubiquitin-c protein-coding  
protein kin protein-coding  
degenerati protein-coding  
testis expr protein-coding  
zinc finger protein-coding  
interleukin protein-coding  
TBC1 domε protein-coding  
transportin protein-coding  
glutamine- protein-coding  
syntrophin protein-coding  
pleckstrin ε protein-coding  
nucleolar p protein-coding  
protein ph protein-coding  
RIKEN cDN. protein-coding  
methylpho protein-coding  
casein kina protein-coding  
chloride int protein-coding

solute carri protein-coding  
microtubul protein-coding  
mitochond protein-coding  
RNA bindin protein-coding  
carbohydræ protein-coding  
GLI pathog protein-coding  
cryptochro protein-coding  
glycosylphc protein-coding  
glutaminas protein-coding  
outer dens protein-coding  
Meis home protein-coding  
cyclin-depe protein-coding  
glypican 1 protein-coding  
zinc finger, protein-coding  
DnaJ (Hsp4 protein-coding  
platelet-de protein-coding  
SPRY doma protein-coding  
ubiquitin fæ protein-coding  
eukaryotic protein-coding  
cell divisior protein-coding  
endoplasm protein-coding  
Ras-relatec protein-coding  
cytohesin 1 protein-coding  
NOP56 ribc protein-coding  
RIKEN cDN. protein-coding  
SH3 domai protein-coding  
NLR family, protein-coding  
methyltran protein-coding  
basic leucir protein-coding  
lysophosph protein-coding  
RIKEN cDN. protein-coding  
calpain 10 protein-coding  
actin, beta protein-coding  
sperm anti protein-coding  
histocomp protein-coding  
calcium ch protein-coding  
RE1-silenci protein-coding  
AT-hook tr protein-coding  
UDP-gluco protein-coding  
homeobox protein-coding  
ribosomal protein-coding  
CLP1, cleav protein-coding  
destrin protein-coding  
androgen c protein-coding  
interleukin protein-coding  
adrenergic protein-coding  
hemochror protein-coding

selenophos protein-coding  
polymerase protein-coding  
ubiquinol-c protein-coding  
RAB18, me protein-coding  
mitochond protein-coding  
DDHD dom protein-coding  
LIM domain protein-coding  
family with protein-coding  
Mediterranean protein-coding  
RIKEN cDN. protein-coding  
lectin, galactose protein-coding  
arrestin domain protein-coding  
UDP-Galactose 4-epimerase protein-coding  
collagen, type I protein-coding  
platelet/endothelial protein-coding  
insulin-like protein-coding  
zinc finger, protein-coding  
aminopeptidase protein-coding  
fibrillin 1 protein-coding  
RIKEN cDN. protein-coding  
latrophilin protein-coding  
family with protein-coding  
ankyrin repeat protein-coding  
high mobility protein-coding  
chaperonin protein-coding  
methyltransferase protein-coding  
major facilitator protein-coding  
low density lipoprotein protein-coding  
pleckstrin homology protein-coding  
solute carrier protein-coding  
annexin A2 protein-coding  
bystin-like protein-coding  
general transcription factor protein-coding  
inositol 1,4-bisphosphate protein-coding  
tumor necrosis factor protein-coding  
SDE2 telomerase protein-coding  
Fas (TNF receptor) protein-coding  
neutrophil protein-coding  
sortilin-related protein-coding  
interleukin protein-coding  
serine (or cysteine) protein-coding  
ADP-ribosyltransferase protein-coding  
transmembrane protein-coding  
PX domain protein-coding  
centriolin protein-coding  
proline rich protein-coding  
mitogen-activated protein-coding

zinc finger protein-coding  
coenzyme I protein-coding  
olfactory receptor protein-coding  
heterogeneous protein-coding  
ARP3 actin protein-coding  
NudC domain protein-coding  
G patch domain protein-coding  
ribosomal protein-coding  
ceramide synthase protein-coding  
vascular endothelial protein-coding  
predicted protein-coding  
FYVE, Rho GTPase protein-coding  
chemokine protein-coding  
granulocyte protein-coding  
aldehyde dehydrogenase protein-coding  
Zinc finger protein-coding  
runt related protein-coding  
solute carrier protein-coding  
RAB2A, membrane protein-coding  
F-box and WD domain protein-coding  
sulfide quinone oxidoreductase protein-coding  
cytochrome protein-coding  
prostaglandin synthase protein-coding  
heat shock response protein-coding  
GTPase, immunophilin protein-coding  
nuclear casein kinase protein-coding  
engulfment protein-coding  
nuclear receptor protein-coding  
glucuronidase protein-coding  
ribonucleoprotein protein-coding  
high-mobility group protein-coding  
carcinoembryonic protein-coding  
F-box protein-coding  
spondin protein-coding  
tRNA-histidyl protein-coding  
HtrA serine protein-coding  
solute carrier protein-coding  
F-box protein-coding  
testis expressed protein-coding  
zinc finger protein-coding  
transcription protein-coding  
neutrophil protein-coding  
fibronectin protein-coding  
elastase, neutrophil protein-coding  
transmembrane protein-coding  
translocase protein-coding  
transducin protein-coding

metastasis protein-coding  
RIKEN cDN. protein-coding  
serine/argi protein-coding  
serum/gluc protein-coding  
bromodom protein-coding  
NADH dehy protein-coding  
transmemk protein-coding  
transmemk protein-coding  
transmemk protein-coding  
GAR1 ribor protein-coding  
family with protein-coding  
tyrosine 3- protein-coding  
proline-ser protein-coding  
protein dis protein-coding  
ficolin B protein-coding  
coagulator protein-coding  
membrane protein-coding  
family with protein-coding  
fer (fms/fp protein-coding  
Mab-21 do protein-coding  
cAMP resp. protein-coding  
DDB1 and ( protein-coding  
otogelin-lik protein-coding  
WD repeat protein-coding  
chromatin protein-coding  
dipeptidylc protein-coding  
growth diff protein-coding  
sphingomy protein-coding  
transmemk protein-coding  
serine/thre protein-coding  
zinc finger protein-coding  
NADH dehy protein-coding  
lymphobla: protein-coding  
transforma protein-coding  
NUF2, NDC protein-coding  
DET1 and [ protein-coding  
vacuolar pr protein-coding  
calcium ch; protein-coding  
phospholy; protein-coding  
CASP2 and protein-coding  
carbohydrã protein-coding  
adenylate l protein-coding  
oxidative si protein-coding  
DNA methy protein-coding  
LIM domaii protein-coding  
autophagy protein-coding  
methionine protein-coding

dolichol-ph protein-coding  
inhibin bet. protein-coding  
ATPase fan protein-coding  
aprataxin a protein-coding  
RAP1 GTPa protein-coding  
biogenesis protein-coding  
zinc finger protein-coding  
zinc finger protein-coding  
GRAM dor protein-coding  
ribophorin protein-coding  
suppressor protein-coding  
Kruppel-lik protein-coding  
stromal int protein-coding  
eukaryotic protein-coding  
G elongatic protein-coding  
CDC14 cell protein-coding  
Meis home protein-coding  
signal-indu protein-coding  
prostaglan protein-coding  
suppressor protein-coding  
protein ph protein-coding  
thyrotroph protein-coding  
oxysterol b protein-coding  
UDP-Gal:b protein-coding  
ATP-bindin protein-coding  
placenta e protein-coding  
CAP-GLY d protein-coding  
relaxin/ins protein-coding  
coactosin-l protein-coding  
defective ir protein-coding  
PWWP dor protein-coding  
deleted in l protein-coding  
electron tr protein-coding  
fucosyltran protein-coding  
vacuolar pr protein-coding  
growth arr protein-coding  
dihydrolipc protein-coding  
F-box prote protein-coding  
transmemk protein-coding  
ATPase, ar protein-coding  
senataxin protein-coding  
unc-13 hor protein-coding  
olfactomec protein-coding  
solute carri protein-coding  
sterile alph protein-coding  
FIC domain protein-coding  
RAB3D, me protein-coding

sodium channel protein-coding  
zinc finger protein-coding  
proline-rich protein-coding  
spindle anchor protein-coding  
Krüppel-like protein-coding  
RIKEN cDNA protein-coding  
splein/ryano protein-coding  
zinc finger protein-coding  
family with protein-coding  
RAS p21 protein-coding  
lysophospholipase protein-coding  
dual specific protein-coding  
LSM14 homolog protein-coding  
sperm acrosome protein-coding  
MAK16 homolog protein-coding  
anthrax toxin protein-coding  
CD101 anti protein-coding  
short chain protein-coding  
nuclear factor protein-coding  
CTS telomerase protein-coding  
slingshot homolog protein-coding  
calcium/calmodulin protein-coding  
kelch-like 3 protein-coding  
Fyn proto-oncogene protein-coding  
myeloid cell protein-coding  
Krüppel-like protein-coding  
olfactomedian protein-coding  
ATPase, H<sup>+</sup> protein-coding  
small nuclear protein-coding  
latent transmembrane protein-coding  
guanine nucleotide protein-coding  
vascular cell protein-coding  
sterile alpha protein-coding  
lymphoblastoma protein-coding  
salivary-like 1 (C protein-coding  
chloride intracellular protein-coding  
secretory component protein-coding  
cyclin-dependent protein-coding  
adducin 3 ( protein-coding  
fibronectin protein-coding  
SUZ12 RNA binding protein-coding  
family with protein-coding  
protein disulfide protein-coding  
kelch-like 2 protein-coding  
homeodomain protein-coding  
predicted protein-coding  
solute carrier protein-coding



cyclin L1 protein-coding  
CASP8 and protein-coding  
translocase protein-coding  
leucine rich protein-coding  
ariadne ub protein-coding  
major facili protein-coding  
Sjogren syr protein-coding  
guanidinoa protein-coding  
family with protein-coding  
nuclear ca $\gamma$  protein-coding  
ataxin 7 protein-coding  
RIKEN cDN. protein-coding  
pleckstrin l protein-coding  
proviral int protein-coding  
zinc finger protein-coding  
phosphodi protein-coding  
neuropilin protein-coding  
alkaline ce protein-coding  
von Hippel protein-coding  
predicted  $\xi$  protein-coding  
predicted  $\xi$  protein-coding  
multiple EC protein-coding  
interleukin protein-coding  
3'-phosphc protein-coding  
MAP/micrc protein-coding  
serine/thre protein-coding  
CLK4-assoc protein-coding  
transmemt protein-coding  
zinc finger, protein-coding  
anaphase  $\tau$  protein-coding  
solute carri protein-coding  
CD97 antig protein-coding  
schlafen 9 protein-coding  
T cell activ protein-coding  
cell divisor protein-coding  
IscU iron-s protein-coding  
spectrin re protein-coding  
angiogenic protein-coding  
serine (or c protein-coding  
mex3 hom protein-coding  
peptidylprc protein-coding  
OTU deubi protein-coding  
rhomboid c protein-coding  
RIKEN cDN. protein-coding  
minichrom protein-coding  
RB-associa protein-coding  
mitochond protein-coding

mannan-bi protein-coding  
mannosida protein-coding  
TBC1 domæ protein-coding  
eukaryotic protein-coding  
neural prec protein-coding  
myosin VII/ protein-coding  
suppressio protein-coding  
dolichol kir protein-coding  
wingless-ty protein-coding  
prenyl (sol; protein-coding  
chemokine protein-coding  
arginyl ami protein-coding  
plexin D1 protein-coding  
ring finger protein-coding  
transmemt protein-coding  
JAZF zinc fi protein-coding  
popeye doi protein-coding  
3-oxoacid ( protein-coding  
serine/argi protein-coding  
carnitine di protein-coding  
CCR4-NOT protein-coding  
olfactory rε protein-coding  
cms small r protein-coding  
karyopheri protein-coding  
methyltran protein-coding  
poly (ADP-i protein-coding  
amplified ii protein-coding  
fibronectin protein-coding  
RIKEN cDN. protein-coding  
mitogen-ac protein-coding  
oligonuclec protein-coding  
RAB12, me protein-coding  
nucleic acic protein-coding  
coiled-coil protein-coding  
strawberry protein-coding  
matrix met protein-coding  
asparagine protein-coding  
SDE2 telor protein-coding  
ski sarcom; protein-coding  
zinc finger protein-coding  
CDC42 sma protein-coding  
antagonist protein-coding  
mitochond protein-coding  
chemokine protein-coding  
zinc finger protein-coding  
zinc finger protein-coding  
tripartite rr protein-coding

ubiquitin-c protein-coding  
golgi autoa protein-coding  
family with protein-coding  
transmemk protein-coding  
zinc finger protein-coding  
furry homc protein-coding  
ubinuclein protein-coding  
cDNA sequ protein-coding  
attractin protein-coding  
bone morp protein-coding  
pumilio RN protein-coding  
solute carri protein-coding  
numb gene protein-coding  
zinc finger, protein-coding  
macrophag protein-coding  
golgi coiled protein-coding  
endothelin protein-coding  
aldehyde d protein-coding  
STAM bind protein-coding  
solute carri protein-coding  
rhomboid ! protein-coding  
glutamyl ar protein-coding  
solute carri protein-coding  
cDNA sequ protein-coding  
Kruppel-lik protein-coding  
zinc finger protein-coding  
spleen focl protein-coding  
eukaryotic protein-coding  
hect (homc protein-coding  
phosphatic protein-coding  
origin reco; protein-coding  
UDP glucur protein-coding  
cAMP resp; protein-coding  
protein ph; protein-coding  
uridine-cyt protein-coding  
UPF1 regul protein-coding  
ADP-ribosy protein-coding  
proline rich protein-coding  
zinc finger protein-coding  
RIKEN cDN. protein-coding  
upstream k protein-coding  
endonucle; protein-coding  
myotubula protein-coding  
cytochrom; protein-coding  
bone morp protein-coding  
glycoprotei protein-coding  
integral me protein-coding

v-abl Abels protein-coding  
bleomycin protein-coding  
RNA pseud protein-coding  
dual specifi protein-coding  
kelch-like 1 protein-coding  
carbonic ar protein-coding  
torsin A int protein-coding  
grainyhead protein-coding  
ATPase, Ca protein-coding  
leucine rich protein-coding  
antizyme ir protein-coding  
BTG3 assoc protein-coding  
BMP2 indu protein-coding  
tumor necr protein-coding  
zinc finger, protein-coding  
protein O-f protein-coding  
protein ph protein-coding  
fer (fms/fp protein-coding  
DEAD (Asp- protein-coding  
zinc finger protein-coding  
mitochond protein-coding  
metallo-be protein-coding  
cortactin b protein-coding  
protein-L-is protein-coding  
DNA methy protein-coding  
POU doma protein-coding  
potassium protein-coding  
jun proto-c protein-coding  
RIKEN cDN. protein-coding  
predicted  $\xi$  protein-coding  
trafficking | protein-coding  
endothelin protein-coding  
sphingomy protein-coding  
ADP-ribosy protein-coding  
regulator o protein-coding  
PTK7 prote protein-coding  
lactation el protein-coding  
transforma protein-coding  
sema dom; protein-coding  
neuralized protein-coding  
cyclin-depe protein-coding  
polymerase; protein-coding  
ring finger protein-coding  
POC1 centr protein-coding  
breast carc protein-coding  
mitochond protein-coding  
serine inco protein-coding

lysophosph protein-coding  
intraflagell. protein-coding  
zinc finger protein-coding  
regulator o protein-coding  
Alport sync protein-coding  
mitochond protein-coding  
calcium ch; protein-coding  
trinucleotic protein-coding  
Kruppel-lik protein-coding  
transmemk protein-coding  
zinc finger protein-coding  
ADP-deper protein-coding  
acetyl-Coei protein-coding  
ATP-bindin protein-coding  
K(lysine) ac protein-coding  
Berardinell protein-coding  
cyclin-depe protein-coding  
RIKEN cDN. protein-coding  
SEC62 hom protein-coding  
WD repeat protein-coding  
activating t protein-coding  
calcium ch; protein-coding  
vinculin protein-coding  
E2F transcr protein-coding  
REX4, RNA protein-coding  
adaptor-re protein-coding  
mitogen-ac protein-coding  
glycophorii protein-coding  
kelch-like 2 protein-coding  
CREB/ATF I protein-coding  
zinc finger, protein-coding  
ribosomal I protein-coding  
ring finger protein-coding  
FERM dom protein-coding  
XRCC6 binc protein-coding  
lysine (K)-s protein-coding  
transmemk protein-coding  
lactate deh protein-coding  
heparan-al protein-coding  
intraflagell. protein-coding  
cell divisor protein-coding  
polyhomec protein-coding  
ubiquitin-li protein-coding  
GLE1 RNA ε protein-coding  
Kruppel-lik protein-coding  
YLP motif c protein-coding  
paxillin protein-coding

DNA prima protein-coding  
zinc finger protein-coding  
COMM dor protein-coding  
caspase aci protein-coding  
serine/argi protein-coding  
tRNA isope protein-coding  
gamma-am protein-coding  
alkaline ph protein-coding  
ATPase, Ca protein-coding  
transketolase protein-coding  
bromodom protein-coding  
solute carri protein-coding  
zinc finger protein-coding  
phosphoglu protein-coding  
potassium protein-coding  
phosphatic protein-coding  
enhancer c protein-coding  
transducin protein-coding  
interferon protein-coding  
thrombosp protein-coding  
phosphofru protein-coding  
CDK5 regul protein-coding  
ATP-bindin protein-coding  
ski sarcoma protein-coding  
major urin protein-coding  
tweety hor protein-coding  
tonsoku-lik protein-coding  
breakpoint protein-coding  
OTU domai protein-coding  
sorting nex protein-coding  
ectonucleo protein-coding  
GTP bindin protein-coding  
fos-like ant protein-coding  
exosome c protein-coding  
SR-related protein-coding  
microsoma protein-coding  
ATPase, H<sup>+</sup> protein-coding  
breast can protein-coding  
CD97 antig protein-coding  
exocyst cor protein-coding  
myosin IE protein-coding  
complemei protein-coding  
glutaredox protein-coding  
B and T lyn protein-coding  
sorting nex protein-coding  
5-aminoim protein-coding  
beta-1,4-N protein-coding

MOB family protein-coding  
peroxisome protein-coding  
transmembrane protein-coding  
WD repeat protein-coding  
myomesin protein-coding  
proteasome protein-coding  
DnaJ (Hsp40) protein-coding  
astrotactin protein-coding  
family with serine/threonine phosphatase protein-coding  
filamin C, gamma protein-coding  
ATPase, class 1 protein-coding  
serine (or cysteine) protein-coding  
exocyst core protein-coding  
RAN, membrane-associated protein-coding  
Jun dimerization protein-coding  
egl-9 family protein-coding  
DnaJ (Hsp40) protein-coding  
plectin protein-coding  
zeta-chain protein-coding  
SMAD family protein-coding  
formin-like protein-coding  
lymphocyte protein-coding  
mago-nash protein-coding  
complement protein-coding  
LSM2 homolog protein-coding  
transformer protein-coding  
solute carrier protein-coding  
RWD domain protein-coding  
fibronectin protein-coding  
mitochondrial protein-coding  
von Willebrand factor protein-coding  
Ral GEF with Ras protein-coding  
golgin, RAB11 protein-coding  
elongator epsilon protein-coding  
eukaryotic protein-coding  
folliculin in protein-coding  
phosphoglycyl protein-coding  
START domain protein-coding  
DAZ interaction protein-coding  
calcium channel protein-coding  
RIKEN cDNA protein-coding  
transient receptor protein-coding  
BCL2-like 1 protein-coding  
hexokinase protein-coding  
ER membrane protein-coding  
phosphatidyl protein-coding  
transformer protein-coding

testis expr protein-coding  
hyaluronar protein-coding  
PRP3 pre-n protein-coding  
chitinase d protein-coding  
selenoprot protein-coding  
lysyl oxidas protein-coding  
thrombosp protein-coding  
TBC1 domæ protein-coding  
fidgetin-lik protein-coding  
nucleopori protein-coding  
voltage-dej protein-coding  
period circ protein-coding  
Rho GTPas protein-coding  
CDC14 cell protein-coding  
COMM dor protein-coding  
mitogen-ac protein-coding  
tetratricop protein-coding  
polo-like ki protein-coding  
SDE2 telor protein-coding  
cDNA sequ protein-coding  
immediate protein-coding  
zinc finger protein-coding  
human imr protein-coding  
Y box prote protein-coding  
Rab gerany protein-coding  
family with protein-coding  
heterogen protein-coding  
UDP-GlcNA protein-coding  
Werner he protein-coding  
nitrogen pæ protein-coding  
prothymos protein-coding  
ankyrin re protein-coding  
PAS domaii protein-coding  
transmemk protein-coding  
Rho GTPas protein-coding  
nudix (nucl protein-coding  
diacylglyce protein-coding  
eukaryotic protein-coding  
ancient ubi protein-coding  
tetratricop protein-coding  
zinc finger protein-coding  
anoctamin protein-coding  
cullin 7 protein-coding  
fucosyltran protein-coding  
HtrA serine protein-coding  
membrane protein-coding  
mitogen-ac protein-coding



family with protein-coding  
demethyl-C protein-coding  
cytochrom protein-coding  
phosphatic protein-coding  
gasdermin protein-coding  
predicted  $\xi$  protein-coding  
calcium bir protein-coding  
interferon protein-coding  
poly (ADP-ribose) polymerase protein-coding  
zinc finger protein-coding  
CD300 anti protein-coding  
muscleblin protein-coding  
peroxisomal protein-coding  
RNA binding protein-coding  
protease ( $\zeta$ ) protein-coding  
ropporin 1 protein-coding  
regulator of G-protein signaling protein-coding  
LYR motif c protein-coding  
matrix metalloproteinase protein-coding  
ZPR1 zinc finger protein-coding  
YOD1 OTU protein-coding  
YY1 associated protein-coding  
hect domain protein-coding  
CAP, adenine protein-coding  
Mab-21 domain protein-coding  
polyamine oxidase protein-coding  
kit oncogene protein-coding  
solute carrier protein-coding  
aspartyl-tRNA synthetase protein-coding  
diaphanous protein-coding  
interferon  $\gamma$  protein-coding  
forkhead box protein-coding  
sperm associated protein-coding  
cDNA sequence protein-coding  
gelsolin protein-coding  
copine II protein-coding  
phosphatic protein-coding  
liver glycogen protein-coding  
small integrin protein-coding  
helicase (D) protein-coding  
GLI pathogen protein-coding  
RIKEN cDNA protein-coding  
thioredoxin protein-coding  
eukaryotic protein-coding  
ER membrane protein-coding  
RIKEN cDNA protein-coding  
tripartite repeat protein-coding

chimerin 2 protein-coding  
SNF relatec protein-coding  
sperm spec protein-coding  
tumor necr protein-coding  
endothelia protein-coding  
peroxisom; protein-coding  
IAP promot protein-coding  
arginyl ami protein-coding  
WD repeat protein-coding  
rhotekin protein-coding  
actin relate protein-coding  
colony stir protein-coding  
Ras associa protein-coding  
phosphohi; protein-coding  
thioredoxir protein-coding  
5-hydroxyt protein-coding  
disabled 2, protein-coding  
phospholip protein-coding  
BTB (POZ) ( protein-coding  
integrin alç protein-coding  
transcriptic protein-coding  
phosphatic protein-coding  
THAP dom; protein-coding  
nrde-2 nec protein-coding  
protein ph; protein-coding  
tumor necr protein-coding  
family with protein-coding  
eukaryotic protein-coding  
sperm anti; protein-coding  
alpha glucc protein-coding  
nucleolar p protein-coding  
ST6 (alpha- protein-coding  
RAB28, me protein-coding  
ankyrin reç protein-coding  
Obg-like A1 protein-coding  
Bmi1 polyc protein-coding  
orofacial cl protein-coding  
tubulin folc protein-coding  
RUN and F\ protein-coding  
dual specifi protein-coding  
cellular rep protein-coding  
formin 2 protein-coding  
zinc finger, protein-coding  
ribosomal | protein-coding  
SEH1-like (! protein-coding  
cysteine-se protein-coding  
PHD finger protein-coding

IQ motif co protein-coding  
phosphodi protein-coding  
protein arg protein-coding  
zinc finger protein-coding  
tec protein protein-coding  
phosphatic protein-coding  
dynactin 6 protein-coding  
MRS2 magi protein-coding  
mediator c protein-coding  
malonyl-Cc protein-coding  
S100 calciu protein-coding  
MyoD fami protein-coding  
Rho GDP di protein-coding  
SAM doma protein-coding  
RAS-relate protein-coding  
RIKEN cDN. protein-coding  
TM2 doma protein-coding  
coiled-coil protein-coding  
N-myc dow protein-coding  
regulator o protein-coding  
Moloney s: protein-coding  
influenza v protein-coding  
cyclin-depe protein-coding  
StAR-relate protein-coding  
Rho GTPasi protein-coding  
Fanconi an protein-coding  
euchromat protein-coding  
synaptotag protein-coding  
guanine nu protein-coding  
CD53 antig protein-coding  
lymphocyt protein-coding  
tripartite r protein-coding  
zinc finger protein-coding  
pyroglutar protein-coding  
replication protein-coding  
guanine nu protein-coding  
alpha-kinas protein-coding  
mitogen-ac protein-coding  
ubiquitin s: protein-coding  
choline def protein-coding  
ribosomal j protein-coding  
nucleotide protein-coding  
mast cell e: protein-coding  
ubiquitin s: protein-coding  
bromodom protein-coding  
ATP/GTP bi protein-coding  
ubiquitin-c protein-coding

cytochrome protein-coding  
small nucle protein-coding  
enhancer c protein-coding  
transmemk protein-coding  
B cell trans protein-coding  
armadillo r protein-coding  
F11 recept protein-coding  
calmodulin protein-coding  
kelch-like 1 protein-coding  
jagunal hor protein-coding  
ribosomal j protein-coding  
consortin, ( protein-coding  
RIKEN cDN. protein-coding  
regulator o protein-coding  
spindle anc protein-coding  
isoprenoid protein-coding  
methionine protein-coding  
predicted g protein-coding  
THO compl protein-coding  
cyclin F protein-coding  
RIKEN cDN. protein-coding  
family with protein-coding  
TAF11 RNA protein-coding  
NEDD4 bin protein-coding  
leucine rich protein-coding  
transmemk protein-coding  
ubiquitin-li protein-coding  
sorting nex protein-coding  
DCP1 deca protein-coding  
formin bin protein-coding  
heat shock protein-coding  
Sec23 inter protein-coding  
serine/argi protein-coding  
N(alpha)-ac protein-coding  
ectoderma protein-coding  
ATPase, Na protein-coding  
PQ loop rej protein-coding  
1-acylglyce protein-coding  
DEAD (Asp. protein-coding  
phosphata: protein-coding  
runt relate protein-coding  
pseudouric protein-coding  
RIKEN cDN. protein-coding  
septin 5 protein-coding  
CDP-diacyl protein-coding  
zinc finger protein-coding  
TRAF famil protein-coding

protein kin protein-coding  
heat shock protein-coding  
kit oncoger protein-coding  
RIKEN cDN. protein-coding  
MOB kinas protein-coding  
transformii protein-coding  
lipoxygena protein-coding  
PR domain protein-coding  
cell divisior protein-coding  
ras homolc protein-coding  
small ArfG/ protein-coding  
immediate protein-coding  
Friend leuk protein-coding  
transportei protein-coding  
SPEN homc protein-coding  
neutral sph protein-coding  
lipase, end protein-coding  
RIKEN cDN. protein-coding  
small integ protein-coding  
DNA segmε protein-coding  
HECT domε protein-coding  
proline-rich protein-coding  
AF4/FMR2 protein-coding  
small integ protein-coding  
contactin a protein-coding  
methionyl i protein-coding  
tigger trans protein-coding  
cyclin J protein-coding  
E2F transcr protein-coding  
zinc finger protein-coding  
solute carri protein-coding  
salt inducit protein-coding  
transmemt protein-coding  
RAN bindin protein-coding  
dual specifi protein-coding  
dual specifi protein-coding  
hedgehog ε protein-coding  
NLR family, protein-coding  
meiosis ex protein-coding  
forkhead b protein-coding  
EH-domain protein-coding  
nuclear mit protein-coding  
solute carri protein-coding  
UDP-N-ace protein-coding  
activating t protein-coding  
glutathione protein-coding  
methyl-Cp( protein-coding

glutamic p<sub>1</sub> protein-coding  
Ras associa protein-coding  
aspartic pe protein-coding  
K(lysine) ac protein-coding  
STE20-like protein-coding  
serine paln protein-coding  
protein kin protein-coding  
CDKN2A in protein-coding  
ankyrin re<sub>1</sub> protein-coding  
zinc finger protein-coding  
aryl-hydroc protein-coding  
mitochond protein-coding  
keratinocyl protein-coding  
eukaryotic protein-coding  
progestero protein-coding  
mitochond protein-coding  
lymphocyt protein-coding  
ATPase, Na protein-coding  
O-sialoglyc protein-coding  
HIG1 doma protein-coding  
sphingomy protein-coding  
RIKEN cDN. protein-coding  
inositol 1,4 protein-coding  
G protein-c protein-coding  
doublecort protein-coding  
ATP/GTP bi protein-coding  
phosphatic protein-coding  
interleukin protein-coding  
kelch-like 2 protein-coding  
carbohydr<sub>1</sub> protein-coding  
protease, s protein-coding  
sine oculis- protein-coding  
son of seve protein-coding  
glycoprotei protein-coding  
Casitas B-li protein-coding  
guanine de protein-coding  
tetratricop protein-coding  
autophagy protein-coding  
polycomb  $\xi$  protein-coding  
histone clu protein-coding  
CCAAT/en<sub>1</sub> protein-coding  
tripartite r<sub>1</sub> protein-coding  
testis deriv protein-coding  
dual specifi protein-coding  
tumor necr protein-coding  
stromal an<sub>1</sub> protein-coding  
dihydrouric protein-coding

coiled-coil protein-coding  
AE binding protein-coding  
lactase protein-coding  
ARP3 actin protein-coding  
tetraatricop protein-coding  
otolin 1 ho protein-coding  
cullin assoc protein-coding  
RasGEF doi protein-coding  
galactosida protein-coding  
diphthamir protein-coding  
autophagy protein-coding  
protein tyr protein-coding  
ring finger protein-coding  
H1 histone protein-coding  
mannose ri protein-coding  
suppressor protein-coding  
son of seve protein-coding  
ankyrin re protein-coding  
echinoderr protein-coding  
glypican 1 protein-coding  
cut-like ho protein-coding  
actin-like 7 protein-coding  
malectin protein-coding  
ring-box 1 protein-coding  
RIKEN cDN. protein-coding  
Abelson he protein-coding  
RAS-relate protein-coding  
regulator o protein-coding  
calcium ch protein-coding  
abhydrolas protein-coding  
leucine rich protein-coding  
neurofibro protein-coding  
retinoblast protein-coding  
mitochond protein-coding  
diphthamir protein-coding  
BMP2 indu protein-coding  
UDP-N-ace protein-coding  
excision re protein-coding  
mex3 hom protein-coding  
notch 2 protein-coding  
ST8 alpha-I protein-coding  
kinesin far protein-coding  
nuclear ant protein-coding  
helt bHLH t protein-coding  
zinc finger protein-coding  
muscle anc protein-coding  
serine/thre protein-coding

nicastrin protein-coding  
G patch do protein-coding  
B9 protein protein-coding  
vomeronas protein-coding  
guanosine protein-coding  
SNW doma protein-coding  
olfactory rε protein-coding  
lectin, gala protein-coding  
PDGFA assi protein-coding  
thioredoxir protein-coding  
SET domair protein-coding  
RIKEN cDN. protein-coding  
baculoviral protein-coding  
TCDD-indu protein-coding  
calcium rel protein-coding  
rho/rac gu: protein-coding  
FYVE, Rhoϕ protein-coding  
coiled-coil protein-coding  
vaccinia rel protein-coding  
poly(A) bin protein-coding  
DnaJ (Hsp4 protein-coding  
limb regior protein-coding  
C1q and tu protein-coding  
torsin fami protein-coding  
selectin, lyi protein-coding  
ER membr: protein-coding  
Cbp/p300-i protein-coding  
expressed : protein-coding  
neurturin protein-coding  
ATP/GTP bi protein-coding  
RWD doma protein-coding  
mediator c protein-coding  
KDM1 lysin protein-coding  
FMS-like ty protein-coding  
protein ph protein-coding  
ATP-bindin protein-coding  
eukaryotic protein-coding  
protein ph protein-coding  
Rho guanin protein-coding  
guanosine protein-coding  
active BCR- protein-coding  
ATPase, H+ protein-coding  
transforme protein-coding  
phosphom: protein-coding  
predicted ξ protein-coding  
sorting nex protein-coding  
lymphocyte protein-coding



nudix (nucl protein-coding  
excision re| protein-coding  
tribbles ho protein-coding  
histone de; protein-coding  
Aly/REF ex| protein-coding  
zinc finger protein-coding  
brain-speci protein-coding  
macrophag protein-coding  
asparagine protein-coding  
glycosyltra| protein-coding  
poly(A) bin protein-coding  
versican protein-coding  
hematopoi protein-coding  
potassium protein-coding  
myosin VA protein-coding  
6-phospho protein-coding  
protein kin protein-coding  
solute carri protein-coding  
spindle ap; protein-coding  
THAP dom; protein-coding  
ring finger protein-coding  
ataxin 1 protein-coding  
retinol deh protein-coding  
cyclin-depe protein-coding  
adaptor pri protein-coding  
zinc finger protein-coding  
serine/thre protein-coding  
prokinetici| protein-coding  
cytidine an protein-coding  
multimerin protein-coding  
palladin, cy protein-coding  
nuclear fac protein-coding  
transmemt protein-coding  
F-box and \ protein-coding  
versican protein-coding  
adenosine protein-coding  
2-phospho: protein-coding  
coiled-coil protein-coding  
heat shock protein-coding  
DNA segmε protein-coding  
cell divisor protein-coding  
SNAP-assoc protein-coding  
protein kin protein-coding  
PTPRF inte| protein-coding  
a disintegri protein-coding  
SWI/SNF re protein-coding  
solute carri protein-coding

NEDD4 bin protein-coding  
cyclin-depe protein-coding  
ER membrꝑ protein-coding  
centromerꝑ protein-coding  
Rho GTPasꝑ protein-coding  
family with protein-coding  
GC-rich sec protein-coding  
predicted ꝑ protein-coding  
transmemk protein-coding  
MGAT4 fan protein-coding  
ribosomal ꝑ protein-coding  
coenzyme ꝑ protein-coding  
a disintegri protein-coding  
T cell acute protein-coding  
succinate-C protein-coding  
TSC22 dom protein-coding  
WD repeat protein-coding  
BRF2, subu protein-coding  
carnitine dꝑ protein-coding  
serrate RNꝑ protein-coding  
RIKEN cDN. protein-coding  
GTP cycloh protein-coding  
seven in ab protein-coding  
U2 small nꝑ protein-coding  
E74-like fac protein-coding  
Friend leuk protein-coding  
ribosomal ꝑ protein-coding  
HGH1 hom protein-coding  
Josephin dꝑ protein-coding  
lysine (K)-s protein-coding  
CD93 antig protein-coding  
JAZF zinc fi protein-coding  
heat shock protein-coding  
family with protein-coding  
bromodom protein-coding  
RIKEN cDN. protein-coding  
mannoside protein-coding  
nidogen 2 ꝑ protein-coding  
ets variant protein-coding  
leucine rich protein-coding  
histocompꝑ protein-coding  
interferon ꝑ protein-coding  
CWC27 spli protein-coding  
C-type lectꝑ protein-coding  
hypoxia inc protein-coding  
myoferlin ꝑ protein-coding  
mitochond protein-coding

proteasom protein-coding  
SET binding protein-coding  
serine pept protein-coding  
RAB14, me protein-coding  
RIKEN cDN. protein-coding  
myeloblast protein-coding  
C2 calcium protein-coding  
polycystic l protein-coding  
ribosomal l protein-coding  
lamin B1 protein-coding  
zinc finger protein-coding  
D-2-hydrox protein-coding  
anaphase  $\gamma$  protein-coding  
THAP dom; protein-coding  
transducin protein-coding  
Scm-like wi protein-coding  
a disintegri protein-coding  
solute carri protein-coding  
progesteron a protein-coding  
3'-phospho protein-coding  
N(alpha)-ac protein-coding  
activated k protein-coding  
RIKEN cDN. protein-coding  
CD200 rece protein-coding  
inhibitor of protein-coding  
spastic par; protein-coding  
COBW dom; protein-coding  
N-acetylglu protein-coding  
syntaxin bi protein-coding  
spleen focl protein-coding  
retinoic aci protein-coding  
CDC42 sma protein-coding  
phosphopr protein-coding  
cyclic nucle protein-coding  
TYRO prote protein-coding  
JAZF zinc fi protein-coding  
actin relate protein-coding  
B cell leuke protein-coding  
creatine kir protein-coding  
ephrin A1 protein-coding  
uridine-cyt protein-coding  
solute carri protein-coding  
phosphatic protein-coding  
scaffolding protein-coding  
RAB GTPas protein-coding  
F-box and \ protein-coding  
peroxisom; protein-coding

thioredoxin protein-coding  
G0/G1 switch protein-coding  
phosphodiesterase protein-coding  
quiescins QSOX1 protein-coding  
inhibitor of protein-coding  
non-SMC alpha protein-coding  
fibronectin protein-coding  
transformer protein-coding  
mitochondrial protein-coding  
mannosidase protein-coding  
cyclin Y protein-coding  
cDNA sequence protein-coding  
zinc finger protein-coding  
family with protein-coding  
casein kinase protein-coding  
heparan sulfate protein-coding  
centrosomal protein-coding  
histidine triad protein-coding  
FAT tumor protein-coding  
ubiquitin-conjugating protein-coding  
Sad1 and UBE1 protein-coding  
Bcl2-like 1 protein-coding  
mediator of protein-coding  
oxysterol binding protein-coding  
proteasome protein-coding  
syntrophin protein-coding  
congenital protein-coding  
ring finger protein-coding  
aquaporin protein-coding  
RIKEN cDNA protein-coding  
bora, aurora protein-coding  
ataxin 10 protein-coding  
GC-rich protein-coding  
serological protein-coding  
forkhead box protein-coding  
WD repeat protein-coding  
solute carrier protein-coding  
SH3 domain protein-coding  
male-specific protein-coding  
versican protein-coding  
chemokine protein-coding  
pyruvate dehydrogenase protein-coding  
spermatogonial protein-coding  
discs, large protein-coding  
platelet-activating protein-coding  
nuclear factor protein-coding  
solute carrier protein-coding

mitogen-act protein-coding  
chromobox protein-coding  
jade family protein-coding  
integrin alpha protein-coding  
MPN domain protein-coding  
WD repeat protein-coding  
zinc finger protein-coding  
timeless in protein-coding  
interleukin protein-coding  
trinucleotide protein-coding  
mitochondrial protein-coding  
melanoreg protein-coding  
expressed in protein-coding  
zinc finger protein-coding  
proline rich protein-coding  
arrestin domain protein-coding  
zinc finger protein-coding  
heat shock protein-coding  
interleukin protein-coding  
Ras-related protein-coding  
chromodomain protein-coding  
guanine nucleotide protein-coding  
predicted protein-coding  
Rho GTPase protein-coding  
guanine nucleotide protein-coding  
RASD family protein-coding  
formyl peptide protein-coding  
tribbles homolog protein-coding  
CDC28 protein-coding  
syntaxin 18 protein-coding  
secretory granule protein-coding  
brain abundant protein-coding  
tubulin polymer protein-coding  
RIKEN cDNA protein-coding  
acyl-CoA thioester protein-coding  
lamin B receptor protein-coding  
RIKEN cDNA protein-coding  
disrupted in protein-coding  
family with protein-coding  
vacuolar protein-coding  
CDC42 effector protein-coding  
BCL2-like 1 protein-coding  
ATPase family protein-coding  
RIMS binding protein-coding  
RIKEN cDNA protein-coding  
inhibin beta protein-coding  
heterogeneous protein-coding

HOP home protein-coding  
gamma-sec protein-coding  
splicing fac protein-coding  
ATP-bindin protein-coding  
xyloside xy protein-coding  
histone clu protein-coding  
glutathione protein-coding  
protein kin protein-coding  
RIKEN cDN. protein-coding  
eukaryotic protein-coding  
lysocardiol protein-coding  
DENN/MAI protein-coding  
early growl protein-coding  
heat shock protein-coding  
brain expre protein-coding  
endonucle; protein-coding  
TEN1 telon protein-coding  
muscleblin protein-coding  
ARP3 actin protein-coding  
prothymos protein-coding  
utrophin protein-coding  
Fas-associa protein-coding  
RIKEN cDN. protein-coding  
NADH dehy protein-coding  
ornithine d protein-coding  
SUMO/sen protein-coding  
inositol (m) protein-coding  
AFG3-like / protein-coding  
HGH1 hom protein-coding  
ArfGAP wit protein-coding  
diacylglyce protein-coding  
penta-EF h. protein-coding  
sterol-C5-d protein-coding  
RIKEN cDN. protein-coding  
ribosomal j protein-coding  
GAR1 ribor protein-coding  
ubiquitin c; protein-coding  
ninjurin 2 protein-coding  
histone clu protein-coding  
solute carri protein-coding  
ADP-ribosy protein-coding  
small nucle protein-coding  
acid-sensin protein-coding  
met proto- protein-coding  
chromodor protein-coding  
tet methylc protein-coding  
C-type lecti protein-coding

leucine rich protein-coding  
family with protein-coding  
phosphoty protein-coding  
glyoxalase protein-coding  
ring finger protein-coding  
E2F transcr protein-coding  
protein ph protein-coding  
integrin be protein-coding  
superoxide protein-coding  
E2F transcr protein-coding  
UDP-GlcNA protein-coding
