# Supplementary material for: MLL1 and MLL1 fusion proteins have distinct functions in regulating leukemic transcription program
Source: PubMed Central journal article supplement (PMC4869169; doi:10.1038/celldisc.2016.8), 2016-05-17
Supplement: celldisc20168-s8.pdf [file celldisc20168-s8.pdf]

**Supplemental Table 2** Complete lists for the joint targets of MLL1 and MLL-AF9.

## MLL1 and MLL-AF9 cotargeting gene list

gene ID

Hebp2

Arrdc4

Scaf11

Lrig2

Herc3

Ttll11

Ermp1

Dusp6

Mcm3

Ggh

Mllt10

Trim45

Snx24

Peli3

Oip5

Stk24

Kcnj2

Eltl1

Utrn

Imp2l1

Prkag2

Dnah17

Cerk

Cdk6

Ctdspl

Camk4

Tnpo1

D430042O09Rik

Meis1

Fam212a

Asap1

Sorl1

Zbtb16

Ptprk

Kit

Trps1

Grem2

Cinp

Tmcc1

Vgl4

Nln

C1qtnf7

Stx8

Ubr3

Xylyt1

Pdha2  
Sox21  
Khdrbs3  
Magi1  
Gbe1  
Ctbp2  
Baz1a  
Lyst  
Gm7102  
Cylc2  
Dnah11  
Kcnip4  
Setbp1  
1190002N15Rik  
Msl3l2  
Tmem196  
Ndufb3  
Zbtb38  
Tns3  
Trim67  
Pim3  
Bcat1  
Gm3376  
Gclm  
Slc45a1  
Mtus2  
Mboat1  
Zfp326  
Grik3  
Sdk1  
Sh2b2  
Stxbp5  
Dpy19l1  
Snx18  
Runx2  
Dhrs13  
Tuba8  
Begain  
Zfp36l2  
Gm14461  
Pcdh18  
Mab21l3  
Dlgap4  
Pmp22  
Cacna1b  
Kctd16  
Lemd3

Edem1  
Grin2b  
Fkbp15  
Six1  
Vegfa  
4933430I17Rik  
Osbpl1a  
Tmem106a  
Sort1  
Gpc6  
Sgk3  
Papss2  
Cers6  
Csrnp3  
Lrpprc  
Elmo1  
Mcm8  
Zfp961  
11-Mar  
Slco6d1  
Dpyd  
Ceacam18  
Anp32b  
Tbc1d14  
Atrnl1  
Mapre3  
Jak2  
Ghitm  
Spry2  
Bmp2k  
Elavl2  
Camta1  
Haao  
Cux1  
Cacna2d3  
Opcml  
Erg  
Cdca2  
Syne1  
Prmt6  
Ece1  
Sim1  
Tmem236  
Sel1l  
Chmp4b  
Chd2  
Cacnb4

Galnt7  
Pak3  
Slitrk1  
Josd1  
Olig3  
Ly6c2  
Dtx4  
Arhgap21  
Hlf  
Trib2  
Copb1  
Robo2  
Fzd1  
Epm2a  
9430020K01Rik  
Tcf12  
Pik3r1  
Luzp1  
Galc  
Msr1  
Apbb1ip  
Hnrnpf  
Tnfaip8  
Gcnt1  
St3gal1  
Fryl  
Kat7  
Hira  
Cd226  
Pphln1  
Lrrtm2  
Zfp609  
Nr4a2  
Matn1  
Ccdc114  
Efna5  
Lamtor3  
1700003F12Rik  
1810046K07Rik  
Col25a1  
Polr1c  
Crim1  
Adh5  
Rnf144b  
Rnf103  
Al467606  
Suz12

Stxbp3a  
Il12a  
Cyb561  
Ubr1  
Cox7a2  
Plxna2  
Jmy  
Smarca2  
Creb1  
Clip1  
Cgn  
Nol4  
Arrdc3  
Tinag  
Gsr  
Kif21a  
1700112E06Rik  
Gas7  
Spag17  
Pde7b  
Mat2b  
Ftmt  
Pcdh9  
Susd1  
Enpep  
Ttc19  
Grin2a  
Tnfsf18  
Celsr3  
Epb4.1l5  
Pcdh17  
Trpm3  
Klf6  
Mapre2  
Shh  
Six4  
Brd1  
Chrna7  
Galnt11  
Rap2b  
Pja2  
Tmc3  
Afap1  
Fbxo21  
Col9a1  
Shox2  
Tbxas1

Umps  
Ccne2  
Zfp276  
Spock1  
Ndst3  
Sema3d  
Eva1a  
Rcc1  
Adar  
Tacc2  
Tmem74  
Dhrs3  
Lyplal1  
Coa7  
Cpeb1  
Ptpn12  
    1-Mar  
Dennd2c  
Nsun3  
Snrpa1  
Foxp4  
B630005N14Rik  
Slc30a8  
Nfatc3  
Arap1  
Chd7  
Rab24  
Lysmd4  
Dck  
Mafb  
Fam193a  
Picalm  
Mef2c  
Igf1r  
Gm5549  
Bmper  
Slmap  
Socs6  
Fcho2  
Ston2  
Stag1  
Zfp40  
Trub1  
Fam69a  
Chn2  
Tiam2  
Sec23a

Spns3  
Cdh9  
Morn2  
Pard6g  
Tax1bp1  
Brinp1  
Uso1  
Tulp4  
S1pr3  
AI429214  
    6-Sep  
Vps13a  
Api5  
B4galt6  
Inhba  
Clip2  
Tlx3  
Pbx1  
Acaca  
Neil3  
Pawr  
Nkain3  
Camkmt  
Cdc42  
Adcyap1  
Mbd2  
Tex36  
Reck  
Jmjd1c  
Dip2b  
Cpsf6  
Nsmce1  
D2Wsu81e  
Ahi1  
Depdc5  
Gcnt2  
Vstm2a  
Lmx1a  
Arhgap20  
Hs3st3b1  
Rarb  
Rad51b  
Pde8b  
Psat1  
Spic  
Grm3  
Anxa3



Rsl24d1  
Dfna5  
Tspan11  
N6amt1  
Gpr125  
Cep350  
Cyp27a1  
Zfc3h1  
Il12b  
Pth2r  
Osbp  
Foxp1  
Pwwp2b  
Fam107b  
Apobec3  
Arfgef1  
Brinp3  
Rnf152  
Prkar2b  
Rapgef5  
Pex2  
Hdac9  
Cntnap5a  
Lrtm1  
Igsf10  
Nr2f2  
Hoxa6  
Med13l  
Haus2  
Lnpep  
Slc35b3  
Pdhb  
Ttc32  
Papd5  
Pde3b  
Dclk2  
Dazl  
Itpr1  
Dlx6  
Sgcd  
Atxn10  
Adcy9  
Hoxa10  
Nat10  
Slc12a7  
Slc16a3  
Cwc27

Tmem260  
Ncs1  
Tspan5  
Tenm4  
Rbbp8  
Sstr4  
Reps1  
Calcrl  
Anks1b  
Swap70  
Itgav  
Murc  
Flnb  
Impg1  
Col1a2  
Mvb12b  
3830403N18Rik  
Bach1  
Ccdc171  
Irak1bp1  
Fstl5  
Gm15881  
Spata13  
lyd  
Slc25a13  
Etaa1  
Sfrp2  
F13a1  
4932414N04Rik  
Cdk5rap2  
Skap2  
Dio2  
Slc10a6  
Fam46a  
Samd4  
Fam133b  
Pax3  
Ano4  
Fance  
Ncor2  
Rab13  
2610002J02Rik  
Nfat5  
Ostf1  
Slit3  
Akap7  
Gtf3c3

Cntnap2  
Itih5  
Ptbp2  
Dennd1a  
Adprhl1  
Muc4  
Smco4  
Ndfip1  
Lrrc3b  
Tbc1d1  
Dync2li1  
Alcam  
Gnb2l1  
St8sia4  
Ccrn4l  
Prox1  
Galnt18  
Arhgap32  
Slc2a2  
Adam6b  
Ski  
Gnaz  
Tceb3  
Ppp1r9b  
Ptges  
Stt3b  
Adpgk  
Gpr75  
B3galt2  
Ywhag  
Rgs18  
Kcnn3  
Zfyve21  
Syt7  
Synj2  
Fam122a  
Vwa8  
C2cd4a  
Raly  
Abca1  
Slc39a11  
Plec  
Myo3b  
Cep95  
1700016H13Rik  
Mecom  
Dok5

Zbtb1  
Mbp  
1810013L24Rik  
Impdh1  
Tmem126b  
Gad1  
Spry4  
Fut8  
Atoh1  
Actr3  
Cngb3  
Wdfy3  
Cmpk2  
Zfp800  
Rsb1  
Sntb1  
Nsun4  
Zfp619  
Myb  
Antxr1  
AW209491  
Phtf1  
Lypd1  
Eps15  
Grhl2  
Rev1  
Maml3  
Unc5cl  
Ddhd2  
Htr1a  
Fndc3a  
BC030500  
Fam222b  
Rnf13  
Wnt2  
Ankrd28  
Mapk6  
Adam39  
Nlgn1  
Cwc15  
Olfm4  
Etv6  
Igfbp7  
Zadh2  
Tsc22d1  
Olf161  
Fbxl14

Nufip1  
Slc23a2  
Galnt13  
Mef2a  
Ly86  
Plcb4  
Grik4  
Dgkg  
Rab11fip2  
Celf4  
Ptpr  
Spsb4  
Cr2  
Perp  
Rapgef6  
Klhl32  
Serbp1  
Ivns1abp  
Rasgrp1  
Heatr5a  
Trib1  
St18  
Ctnnbip1  
Fam53a  
Cblb  
Cse1l  
Cdh17  
Kctd20  
Cntnap5b  
Epha6  
Dtx3l  
Ch1  
Trhde  
Gm15800  
Tab2  
Parvg  
Wdr11  
Uimc1  
Khdrbs2  
Ugcg  
Myo10  
Dach1  
Pspc1  
Gdf7  
Atp6ap1l  
Vav3  
Agbl1

Gtpbp4  
Arhgap18  
3110043O21Rik  
Cdh20  
Neto1  
Lsm1  
Sgms1  
Zfp341  
Car12  
Atp11b  
Alx1  
Ubr2  
Clasp2  
Arhgap26  
Prkcb  
Pcmt1  
Nudt12  
Btd  
Slc8a1  
Lpar1  
Rbx1  
Usp6nl  
Phb  
Kcnc2  
Nbas  
Ptk7  
Ncam1  
Hgf  
Tal2  
1700017N19Rik  
Nabp1  
Snx19  
Abca13  
Prkca  
Efr3a  
Uhrf2  
Myh14  
Pigp  
Dnajc25  
Cyp26a1  
Gm13154  
Dkk2  
Tcf7l2  
Chst9  
Idh1  
Ino80c  
Mtfr2

Ncam2  
Rreb1  
Mis18a  
Rasgef1b  
Ch25h  
Ptger2  
Fam65b  
Map3k14  
Nrxn1  
Slitrk5  
Scara5  
Chrm3  
Ernm  
Slc1a4  
Ncor1  
Cxcl12  
Traf4  
Maml2  
Fry  
Glrx  
Ank3  
Dyrk1a  
Mgat4a  
Gng12  
Adamts5  
Megf9  
Nampt  
Kif13b  
Rbm12  
Pbrm1  
Gira1  
Helz  
Rassf9  
Kcnk9  
Slc25a37  
Olfir845  
Tbx18  
4930562C15Rik  
Sorbs1  
Elf1  
Pggt1b  
Phactr2  
Inpp4b  
Ppargc1a  
Bcl2l11  
Frat2  
Zfp804a

1200014J11Rik  
Phtf2  
Fam196b  
Erc2  
BC030307  
Tmeff2  
Wars  
Anapc1  
Dock9  
Lims1  
Kazn  
Fscb  
Wwox  
A1bg  
Ankrd54  
Dnajc6  
Pid1  
Slc16a1  
Med16  
Rab21  
Vcl  
Runx1t1  
Hist1h2bl  
Exoc6  
Ncald  
2700049A03Rik  
N4bp1  
Thrb  
Ubxn2b  
Cers3  
Ckmt2  
Mut  
Lmod3  
Cd93  
Bhlha15  
Btbd3  
Insm2  
Fam60a  
Nova1  
Nav3  
Mbnl1  
Atad2b  
Dcc  
Edn1  
Slc17a6  
Maf  
Mrpl57



Mtmt12

7-Mar

Vps53

Mpz1

Mbd5

Gm3985

Fgd5

Lrrc8d

Pitx2

Rictor

Flrt1

Ifitm1

Agpat9

Ust

Tet2

Msl2

Il6st

Kcnh5

Adamts17

Zmiz2

Slc30a5

Dpp6

Ppapdc1a

Ube2e3

Mnt

Ptprg

Ppp1r9a

Neurod1

Cemip

Zeb2

Bptf

N4bp2l1

Mppe1

Mgat2

Gpam

Tmem132b

Gbbp1

Nrg1

Klf12

Tal1

Lmo2

Kansl1

Wasl

Ctnna2

Pisd

Cypt4

Fam105a

Cytip  
Parp8  
Rasd1  
Esco1  
Scamp1  
Mdga2  
Reep3  
Asl  
Cyp1a2  
Pax9  
Slc3a2  
Fos  
Smim14  
Nrxn3  
Tyrp1  
Prickle2  
Arhgap24  
Commd8  
St7  
Fgf9  
Purb  
Tdrd3  
Vps13c  
Klf5  
Ldlrad4  
Tbcel  
Atxn1  
Rorb  
Sorcs1  
Socs5  
Pla2g4a  
Npsr1  
Mylip  
Foxa2  
Flrt2  
Sash1  
Atp8a2  
Nfia  
Fbxw7  
Nav2  
Ikzf1  
Acvr2a  
Poc1a  
Fam53b  
Dsp  
Cdkn1c  
3830406C13Rik

Rsf1  
Lrp8  
Fam84a  
Ofcc1  
Igfbp3  
Ninj2  
Rab8b  
Gm266  
Ppp3ca  
8030423J24Rik  
Hsfy2  
Btg1  
Phactr1  
Clnk  
Nedd1  
Lingo2  
Galnt3  
Abhd6  
Patz1  
Smap1  
Spock3  
Coq2  
Ppip5k1  
Ldhal6b  
Xrcc6bp1  
Phc3  
Rassf3  
Hs3st5  
BC061194  
Dct  
U2af2  
Tenm2  
Themis2  
Cyp26b1  
Fam179b  
Zcchc2  
Vmn2r94  
Bola3  
Tnfsf8  
Rgs22  
Ugt8a  
Kirrel3  
Foxl1  
Dlg2  
Kcnj6  
2010300C02Rik  
Lrrc56

Unc5d  
Mpp6  
Zfy2  
Kcnma1  
Tcp11  
Nr5a2  
Ap4e1  
Cenpc1  
Rbfox3  
Grb14  
Phlpp2  
Mtdh  
C1galt1  
Rad18  
Slc37a1  
Actn1  
Tspan2  
Hace1  
Ltbp1  
Grid2  
Fat3  
Med12l  
Rims1  
Tmem165  
Tgm6  
Sgce  
Rab28  
Them7  
Tfap2a  
Antxr2  
Atg16l2  
Chchd5  
Ptbp3  
Abcc4  
Papss1  
Esr1  
Pdcd4  
Rbms3  
Egr3  
Fli1  
Nyap2  
Top2b  
Ska2  
Pcdh7  
Naa35  
Vps4a  
Mrps23

Chd9  
Nbea  
Mocs2  
Tbc1d19  
Nanos1  
Nr3c1  
Slc38a2  
Kpna2  
Hoxa7  
Mark1  
Bambi  
Arid3b  
Ttc36  
Wdr27  
Tmem18  
Dhx30  
Fbrs1  
Phykpl  
Efnb2  
Lphn3  
Gfra2  
Trim59  
Eif4ebp2  
Rnmt  
Aebp2  
Crebzf  
Pkn2  
Sucla2  
Irf2  
Crygf  
Atp2b2  
Hao1  
Zfp217  
Hnf4g  
Fkbp5  
Hnrnp11  
Klf4  
Nedd9  
Fam19a4  
Csmc1  
Rpf2  
E030018B13Rik  
Ntf3  
Amigo2  
Med13  
Ppp1r3b  
Vps8

Cst3  
Sema6d  
Jakmip3  
Usp47  
Lysmd2  
Larp4b  
Dsel  
Smim15  
Ppp6c  
Plekhf2  
Ctnna3  
Lap3  
Atp10a  
Pou1f1  
Chordc1  
Ttc29  
Tas2r119  
Mon2  
Ero1l  
Hspb1  
Ets1  
Lrrtm1  
Ntrk3  
1810011010Rik  
Rab39b  
Agtppb1  
Amph  
Hsd11b1  
Lrmp  
Mcur1  
Dennd4a  
Atg4c  
Snx13  
Erbp4  
Sphkap  
Dtnbp1  
Syt6  
Shisa2  
Brd4  
Sntg1  
Gpr116  
Tenm3  
Ctnnd2  
Car10  
Cacnb2  
Sorcs3  
Lhcgr

Lonrf1  
Vav1  
Hmox1  
Flrt3  
Pitpna  
Fgf12  
Utp18  
Mapk13  
Adipor2  
Atoh8  
Trmt11  
Adamts11  
Hp1bp3  
Khdrbs1  
Gpr84  
Mpp7  
Plk2  
Nkx6-1  
Ccdc74a  
Trim32  
Irx1  
Mapk1ip1  
Rap1gap2  
Cd47  
Mgat5  
Tbc1d2  
Mctp2  
4921506M07Rik  
Plet1  
Dppa4  
Kdm4c  
Kdm8  
Cat  
Arid2  
Rbm47  
Triml1  
Rin3  
Fam20b  
Bcdin3d  
Zfp710  
Oprm1  
Fam46c  
Irf2bp2  
Il15  
Elovl6  
Mad2l1  
Zfp365

Kcnj15  
Jam3  
Tsc22d2  
Zfp644  
Adk  
Rora  
Angptl4  
Etv1  
Eya1  
Zfp462  
BC030336  
AI314180  
Epb4.1  
Mgst2  
Rdm1  
Samsn1  
Tcf4  
Mkl2  
Insr  
Nt5c2  
Tbl1xr1  
Snx9  
Abcg2  
Hrh4  
Sos2  
Epha7  
Tmem65  
Mier3  
Plac8  
Rnf145  
Lpp  
Ubl3  
Ppap2b  
Ssbp2  
Rtn4  
Tiam1  
Sipa1l1  
Rnf220  
Capza2  
Ube2k  
Hectd1  
Marcks  
Kctd1  
Dact1  
Aqp4  
Wdr19  
Axin2



Lhfp12  
Cetn3  
Pard3  
Abcd2  
Diras2  
Smad6  
Robo1  
Vmn2r102  
Daam1  
Macc1  
Cobl  
Fat4  
Cd209f  
Lef1  
D8Ertd82e  
Nos1ap  
Ankrd7  
Tox  
Atxn7l3b  
Extl3  
Tmpe  
Pten  
Kif16b  
Pparg  
Itga4  
1700056E22Rik  
Slc9a4  
Sesn1  
Tle4  
Gcsh  
Lrp5  
Adam10  
Atxn7l1  
Gpr176  
Grxcr1  
Pmaip1  
Osbp10  
Gli3  
Rwdd3  
Met  
Mgarp  
Abra  
Snx29  
Kcnj12  
Spin1  
Rapgef2  
Zfp407

Rps15a  
Emp1  
Pygo1  
Aff1  
Frs2  
Ube3a  
Rab11fip4  
App  
Ube2u  
Dock8  
1700015G11Rik  
Minpp1  
Plxnd1  
Isl1  
Basp1  
Ap1s3  
Akap13  
Lsamp  
Msantd2  
Pdzn3  
Adam7  
Pign  
Zfp53  
Rb1cc1  
Crif2  
Arhgap22  
Hnrnpd  
4930447A16Rik  
Arid1b  
Eif4ebp1  
Lypd6  
Sema3b  
Sox5  
Tcerg1l  
Sox6  
Tsc2  
Eno1b  
Csnk1g1  
Irs2  
Stim2  
Irs1  
Olfm1  
Ctdp1  
Bard1  
Dennd5a  
Elf2  
Mettl24

Eif2ak3  
Atg7  
Nt5c1b  
Fam181b  
Csrnp1  
4931408C20Rik  
Elov14  
Speer2  
Epc2  
Thada  
Rrn3  
Ube2h  
Scfd2  
Ddx18  
Tusc1  
Slc7a1  
A530099J19Rik  
Atg4d  
Ptpn2  
Adrb2  
Samd12  
4930523C07Rik  
Cdk5r1  
Etnk1  
Snx10  
Slc10a2  
Ythdf3  
Myh10  
Tmem209  
Gfi1  
Cdk17  
Hs6st3  
4933402J07Rik  
Stxbp6  
1700025G04Rik  
Lrrc4c  
Tgif1  
Abcg3  
Osbp18  
Gm5803  
Slc16a7  
Fzd8  
Csmd3  
Lhx9  
Baz2b  
Vps13b  
Agmo

Fggy  
Vmn1r238  
Abcd3  
Ldb2  
Socs1  
Tmem261  
Utp6  
Srpk1  
Fscn1  
Sqrnl  
Pbx3  
Dock5  
Lypd6b  
Csnka2ip  
Mtss1l  
Aard  
Irf2bpl  
Wac  
Hoxa9  
Gcm2  
Adam12  
Bcl2l14  
Hiat1  
Fmod  
Cntnap4  
Nfatc1  
Npy2r  
Paqr4  
Abca4  
Nsmce2  
Atn2  
Mbnl2  
Cdkal1  
Stc2  
Gstz1  
Bcl11a  
Snx16  
Siah1a  
Tle3  
Plekhh2  
Zfp191  
Hpgd  
Pgd  
Gcc1  
Icip  
Dync1i1  
Lmo4

Clvs1  
Setd5  
Elmsan1  
Gga2  
Ubash3b  
Hnrnpab  
Gm12695  
Gramd3  
Enpp6  
Prss52  
Fam172a  
Lmbrd1  
Ins1  
Pgk1  
Oxr1  
Gda  
Tlr4  
Lace1  
Specc1l  
Zak  
Stx12  
Cd44  
Ttl7  
Rnf111  
Kdm6b  
Pde4a  
Rabgap1l  
Got2  
Pdc1lg2  
Nol11  
Cdca7l  
Mms22l  
Bves  
Prr14l  
1700009N14Rik  
Arhgef26  
Cfap20  
Csgalnact1  
Arid5b  
Best3  
Chaf1a  
Kcng2  
Fnbp1  
Cd53  
Lpin2  
Efhd1  
Tank

Fam174a  
Spsb1  
Epas1  
Lrrc6  
Fndc1  
Trpm1  
Pdia6  
Clec3a  
Veph1  
Magi2  
Tm6sf1  
Adm  
Itpr2  
Hsd17b6  
Srgap1  
Gm527  
Klhl25  
Slc24a2  
Slc2a1  
Sncaip  
Iqcg  
Fam208a  
Mast4  
Usp24  
Mme  
Gata2  
Gpr68  
Cyth3  
Sf3b3  
Tnrc18  
Cntn5  
Tgfbr2  
Lama2  
Iqgap2  
Vmn1r2  
Snx11  
B3gnt2  
Kdm5b  
Ptprd  
Fsd1l  
Pan3  
Fgfbp3  
Mkln1  
1700029F12Rik  
Cdyl2  
4921511H03Rik  
Sptssb

Aldoart2  
Chst14  
St6galnac3  
Ctsb  
Vcpkmt  
Rag2  
Sec23ip  
Zfp536
