# Supplementary material for: MLL1 and MLL1 fusion proteins have distinct functions in regulating leukemic transcription program
Source: PubMed Central journal article supplement (PMC4869169; doi:10.1038/celldisc.2016.8), 2016-05-17
Supplement: celldisc20168-s9.pdf [file celldisc20168-s9.pdf]

**Supplemental Table 3** Transcription Impact by MM-401, EPZ5676, MI-2 and iBET inhibitors on MLL1 and MLL1-AF9 joint targets. Selection Criteria is  $\log_2$  (fold changes)  $>1$  or  $<-1$ .

## MENINi down-regulated joint targets.

| gene    | logfold      |
|---------|--------------|
| Eya1    | -10.46946749 |
| Ugt8a   | -9.713011705 |
| Ttc29   | -8.103310257 |
| Bcl11a  | -7.681299656 |
| Lyp1a1  | -7.187657263 |
| Elavl2  | -7.148113073 |
| Elt1d1  | -6.41299719  |
| Isl1    | -6.163345808 |
| Meis1   | -6.125483172 |
| Clec3a  | -5.18276713  |
| Gm13154 | -5.14750847  |
| Sgce    | -4.685241959 |
| Grb14   | -4.662665171 |
| Pcdh17  | -4.572637335 |
| Antxr1  | -4.341266715 |
| Gata2   | -4.121111866 |
| Igfbp7  | -3.738179423 |
| Amigo2  | -3.661299621 |
| Hpgd    | -3.425829174 |
| Car12   | -3.406621009 |
| Dsel    | -3.135948944 |
| Nrg1    | -3.116977651 |
| Sdk1    | -3.103343321 |
| Fzd8    | -3.034603848 |
| Epha7   | -3.031455222 |
| Bcat1   | -2.96029941  |
| Slc1a4  | -2.943723685 |
| Fgfbp3  | -2.928524286 |
| Ano4    | -2.890722269 |
| Ssbp2   | -2.606769397 |
| Abcg2   | -2.605154763 |
| Parp8   | -2.516902407 |
| Bhlha15 | -2.501063466 |
| Kcng2   | -2.466677973 |
| Prox1   | -2.452043889 |
| Ptpr    | -2.408601585 |
| Gpr125  | -2.393163371 |
| Slc2a2  | -2.338848124 |
| Enpep   | -2.327110899 |
| Col25a1 | -2.276269428 |
| Cyp27a1 | -2.262297994 |
| Mtss1l  | -2.230338315 |
| Ppp1r9a | -2.22255528  |
| Gdf7    | -2.212539403 |
| Prkca   | -2.169687376 |
| Mettl24 | -2.140977995 |
| Lysmd2  | -2.130891605 |

## MENINi up-regulated joint targets.

| gene     | logfold  |
|----------|----------|
| Nfatc1   | 1.005782 |
| Irf2     | 1.008583 |
| Tmc3     | 1.016327 |
| 1700003F | 1.019533 |
| Arap1    | 1.020912 |
| 4930523C | 1.023291 |
| Gm527    | 1.024879 |
| Wdfy3    | 1.039958 |
| 4931408C | 1.040542 |
| Abcd2    | 1.044848 |
| Tmem65   | 1.049649 |
| Atxn1    | 1.053591 |
| Dtx3l    | 1.057816 |
| Myh10    | 1.058234 |
| Hoxa6    | 1.064003 |
| Pde7b    | 1.066433 |
| Zfp276   | 1.067324 |
| Smad6    | 1.077566 |
| Kcnj15   | 1.079347 |
| Mgst2    | 1.093668 |
| Tusc1    | 1.097795 |
| Mboat1   | 1.103553 |
| Snx29    | 1.115612 |
| Fam222b  | 1.116175 |
| Sorl1    | 1.129402 |
| Tgm6     | 1.136668 |
| Themis2  | 1.137191 |
| St3gal1  | 1.156518 |
| Vcl      | 1.161637 |
| Ceacam1e | 1.165019 |
| Gpr75    | 1.165276 |
| Lhfpl2   | 1.168558 |
| Ggh      | 1.175298 |
| Ifitm1   | 1.175605 |
| Dsp      | 1.185253 |
| E030018B | 1.190814 |
| 3830403N | 1.191797 |
| Rap2b    | 1.197387 |
| Cgn      | 1.201733 |
| Fgd5     | 1.209573 |
| Slc23a2  | 1.215924 |
| Cmpk2    | 1.232852 |
| Gpr68    | 1.238564 |
| Lrrc8d   | 1.251527 |
| Pparg    | 1.251914 |
| Lrrtm2   | 1.264236 |
| Map3k14  | 1.270141 |

## DOT1Li down-regulated

| gene     | logfold  |
|----------|----------|
| Nol4     | -6.49039 |
| Elavl2   | -6.44619 |
| Ttc29    | -6.16649 |
| Meis1    | -5.66672 |
| Clec3a   | -5.07874 |
| Pcdh17   | -4.62961 |
| Zbtb16   | -4.61783 |
| Gm13154  | -4.43815 |
| Elt1d1   | -4.34044 |
| Hpgd     | -4.09194 |
| Gata2    | -4.06928 |
| Bcl11a   | -3.92006 |
| Ano4     | -3.84051 |
| Isl1     | -3.69403 |
| Bhlha15  | -3.55599 |
| Fzd8     | -3.29969 |
| Dsel     | -3.22161 |
| Six4     | -3.20863 |
| Car12    | -3.16743 |
| Tcerg1l  | -3.16094 |
| Gpr125   | -3.0991  |
| Antxr1   | -3.07727 |
| Fut8     | -2.88103 |
| C2cd4a   | -2.8524  |
| Fgfbp3   | -2.82017 |
| Nrg1     | -2.81807 |
| 1700016H | -2.73876 |
| Irs1     | -2.73088 |
| Grb14    | -2.65076 |
| Mtss1l   | -2.55932 |
| S1pr3    | -2.5006  |
| Igfbp7   | -2.49011 |
| Efh1d1   | -2.4591  |
| Trpm3    | -2.32938 |
| Il12a    | -2.32689 |
| Cr2      | -2.31537 |
| Parp8    | -2.27062 |
| Slc1a4   | -2.24456 |
| Lysmd2   | -2.23509 |
| Slc2a2   | -2.2248  |
| Elovl6   | -2.22256 |
| Epha7    | -2.15734 |
| Cyp27a1  | -2.14354 |
| Enpep    | -2.12197 |
| Pard6g   | -2.12011 |
| Gpam     | -2.11319 |
| Kcng2    | -2.0627  |

|           |              |           |          |           |          |
|-----------|--------------|-----------|----------|-----------|----------|
| Kazn      | -2.124402298 | C1galt1   | 1.27341  | Kctd1     | -2.03045 |
| Sfrp2     | -2.015447113 | N4bp2l1   | 1.28226  | Dio2      | -2.00008 |
| Kctd1     | -2.013343786 | Spry4     | 1.287738 | Mettl24   | -1.97397 |
| Hist1h2bl | -2.011314467 | Eva1a     | 1.292015 | Grik4     | -1.97344 |
| Tsc22d1   | -1.945965419 | Rnf111    | 1.300376 | Rab39b    | -1.97292 |
| Inpp4b    | -1.884074846 | Tbc1d2    | 1.310538 | Sdk1      | -1.9619  |
| Myh14     | -1.866650429 | Cyth3     | 1.313857 | Mgat5     | -1.94948 |
| Prickle2  | -1.857725713 | Mbp       | 1.313937 | Cdk6      | -1.91092 |
| Nr4a2     | -1.855676953 | Snx10     | 1.315313 | Pdcd4     | -1.88521 |
| Umps      | -1.84229086  | A530099J  | 1.327271 | 1700112E1 | -1.88517 |
| Psat1     | -1.840585426 | Herc3     | 1.330935 | Chl1      | -1.87106 |
| Plac8     | -1.821917765 | Al467606  | 1.336277 | Tsc22d1   | -1.84863 |
| Elov16    | -1.808406016 | Calcr1    | 1.339579 | Samd4     | -1.78894 |
| Six4      | -1.798485591 | Ttll11    | 1.34688  | Bcat1     | -1.7709  |
| Atp10a    | -1.798177716 | Reep3     | 1.347555 | Trim45    | -1.74309 |
| Myb       | -1.789942705 | Mef2a     | 1.354107 | Col25a1   | -1.72097 |
| Rwdd3     | -1.769302161 | Cacnb4    | 1.357417 | Ppargc1a  | -1.72032 |
| 9430020K1 | -1.761458019 | Lims1     | 1.357619 | Amigo2    | -1.65708 |
| Arhgap32  | -1.759345501 | Kdm6b     | 1.360346 | Umps      | -1.65421 |
| Fam60a    | -1.746063305 | Cdk5r1    | 1.366522 | Trib2     | -1.65099 |
| Impdh1    | -1.737102692 | Gcm2      | 1.374493 | Rwdd3     | -1.62926 |
| 1700112E1 | -1.730096339 | Erg       | 1.393761 | Adamts17  | -1.62454 |
| Trpm3     | -1.714257413 | Celf4     | 1.393942 | Abcg2     | -1.61765 |
| Usp6nl    | -1.706785461 | Nanos1    | 1.394475 | Bambi     | -1.61735 |
| Gpam      | -1.704975989 | Ube2h     | 1.4044   | Lypd6b    | -1.60849 |
| Stc2      | -1.690601227 | Ubash3b   | 1.406012 | Xrcc6bp1  | -1.60822 |
| Frat2     | -1.676594483 | Adcy9     | 1.420054 | Tgif1     | -1.59378 |
| Ddx18     | -1.675335308 | Glrx      | 1.430459 | Kcnh5     | -1.5925  |
| Foxp1     | -1.634866238 | Dach1     | 1.443603 | Nat10     | -1.58337 |
| Cdk6      | -1.634035942 | Sema3b    | 1.45871  | Myb       | -1.57436 |
| Tcf4      | -1.632503579 | Btg1      | 1.485721 | Frat2     | -1.57088 |
| Flnb      | -1.620591602 | Gpr84     | 1.49498  | Gcsh      | -1.56338 |
| Rcc1      | -1.607792382 | Arid3b    | 1.506646 | Atp10a    | -1.557   |
| S1pr3     | -1.6030447   | Plet1     | 1.524426 | St7       | -1.55313 |
| Eno1b     | -1.59138902  | Zfp804a   | 1.52946  | Kazn      | -1.5379  |
| Adamts17  | -1.58991956  | Jak2      | 1.555702 | Trub1     | -1.53291 |
| Trim45    | -1.58574077  | Fam196b   | 1.567047 | Afap1     | -1.51287 |
| Fut8      | -1.578375061 | Ets1      | 1.568413 | Prickle2  | -1.50866 |
| Nat10     | -1.536039514 | Abca13    | 1.585402 | Gramd3    | -1.49519 |
| Phtf2     | -1.532797602 | Rdm1      | 1.587522 | Dnajc6    | -1.49141 |
| St7       | -1.52481764  | Irs2      | 1.594018 | 9430020K1 | -1.47697 |
| Msl3l2    | -1.513919085 | Peli3     | 1.608219 | Lap3      | -1.46153 |
| Ttc36     | -1.510271156 | Thrb      | 1.615154 | Wdr27     | -1.45834 |
| Sncaip    | -1.506986727 | Ski       | 1.627668 | Eno1b     | -1.44455 |
| Immp2l1   | -1.490307514 | Fry       | 1.634185 | Rcc1      | -1.41848 |
| Trub1     | -1.48431068  | Dusp6     | 1.645764 | Myh14     | -1.41705 |
| Mcm3      | -1.47116514  | Kif13b    | 1.678456 | Prox1     | -1.39651 |
| Mgat5     | -1.463981954 | Tbxas1    | 1.680944 | Ddx18     | -1.39126 |
| Crim1     | -1.443681038 | Rab11fip4 | 1.682413 | Slc16a1   | -1.37624 |

|          |              |          |          |          |          |
|----------|--------------|----------|----------|----------|----------|
| Efh1     | -1.437417406 | 2010300C | 1.682993 | Impdh1   | -1.37504 |
| Vcpkmt   | -1.430071749 | Ctdspl   | 1.684498 | Dnajc25  | -1.37364 |
| Pard6g   | -1.427608047 | Zfp365   | 1.693936 | Tcf4     | -1.3697  |
| Spns3    | -1.415764429 | Snx24    | 1.70093  | Phtf2    | -1.36581 |
| Angptl4  | -1.396416225 | Klf6     | 1.717615 | Bola3    | -1.35998 |
| Adamts5  | -1.375389803 | Ctsb     | 1.72363  | Chd9     | -1.35142 |
| Pbx3     | -1.368425565 | Tulp4    | 1.725246 | Plac8    | -1.33945 |
| Tgif1    | -1.365807365 | Chrm3    | 1.76687  | Usp6nl   | -1.33618 |
| Slc7a1   | -1.328932967 | Matn1    | 1.775517 | St8sia4  | -1.33133 |
| Perp     | -1.315560289 | Gcnt1    | 1.784464 | Fam60a   | -1.32137 |
| Lap3     | -1.311892304 | Klf5     | 1.800294 | Six1     | -1.32131 |
| Dio2     | -1.290714546 | Dazl     | 1.803892 | Smco4    | -1.30821 |
| 1810011O | -1.288259367 | Csrnp1   | 1.827739 | Gng12    | -1.30289 |
| Mtus2    | -1.287157751 | Slc8a1   | 1.836433 | Diras2   | -1.29006 |
| Rpf2     | -1.265692765 | Nedd9    | 1.841202 | Itpr1    | -1.28592 |
| C2cd4a   | -1.263923518 | Cyb561   | 1.848122 | Crim1    | -1.28191 |
| Gcsh     | -1.259604297 | Hdac9    | 1.851376 | D8Ert82e | -1.27114 |
| Dnajc6   | -1.255527146 | Rnf144b  | 1.86066  | Lrpprc   | -1.26453 |
| Phb      | -1.251046766 | Nabp1    | 1.875028 | B4galt6  | -1.26246 |
| B4galt6  | -1.242930665 | Adpgk    | 1.923035 | Tox      | -1.25829 |
| 1190002N | -1.235575871 | Dock9    | 1.950411 | Mgarp    | -1.25765 |
| Slc16a1  | -1.219782202 | Acvr2a   | 1.955574 | Angptl4  | -1.23862 |
| Pdcd4    | -1.216360368 | Hmox1    | 1.966633 | Mcm3     | -1.22282 |
| Dnajc25  | -1.209377644 | Adrb2    | 1.972001 | Phb      | -1.2197  |
| Galnt11  | -1.200757762 | Cdh17    | 2.020277 | Psat1    | -1.21342 |
| Minpp1   | -1.196871498 | Megf9    | 2.024485 | Vps13c   | -1.21014 |
| Lmo2     | -1.19293411  | 3110043O | 2.040774 | Inpp4b   | -1.20229 |
| Tdrd3    | -1.175752085 | Kirrel3  | 2.079347 | Xxylt1   | -1.20148 |
| Epb4.115 | -1.157615681 | Hsd11b1  | 2.080116 | Sgce     | -1.20036 |
| D8Ert82e | -1.154013223 | Tenm4    | 2.104887 | Wars     | -1.19675 |
| Cyp26a1  | -1.150797612 | Tcf7l2   | 2.115028 | Nufip1   | -1.19489 |
| Xrcc6bp1 | -1.143751968 | Tgfb2    | 2.115292 | Msl3l2   | -1.18254 |
| Bola3    | -1.134905311 | Fam65b   | 2.12031  | Prkca    | -1.17245 |
| Mgarp    | -1.128809819 | Rassf3   | 2.124689 | Runx2    | -1.15306 |
| Snrpa1   | -1.128174829 | Reck     | 2.127464 | Pdia6    | -1.13608 |
| Acaca    | -1.124968571 | Sqrdl    | 2.135628 | Arrdc3   | -1.12809 |
| Nufip1   | -1.106588594 | Ptges    | 2.137503 | Osdbl1a  | -1.12779 |
| Pdia6    | -1.094057192 | Dlg2     | 2.209573 | Rnf152   | -1.12226 |
| Gtpbp4   | -1.093501498 | Mast4    | 2.216103 | Sfrp2    | -1.12125 |
| Serbp1   | -1.092546047 | Lpp      | 2.220999 | Nr4a2    | -1.10899 |
| Sipa1l1  | -1.090356751 | Agpat9   | 2.22101  | Stc2     | -1.10452 |
| Ankrd28  | -1.089369416 | Etv1     | 2.225854 | Foxp1    | -1.08975 |
| Itpr1    | -1.081892366 | Tal2     | 2.251383 | Papss1   | -1.04644 |
| Met      | -1.060905159 | Tmem106i | 2.252065 | Zfp609   | -1.04182 |
| Lrpprc   | -1.045637316 | Ptger2   | 2.25874  | Flnb     | -1.0339  |
| Coq2     | -1.045149717 | Nos1ap   | 2.277356 | Met      | -1.03304 |
| Xxylt1   | -1.044404407 | Cers3    | 2.286407 | Irak1bp1 | -1.03251 |
| Chd9     | -1.041978393 | Luzp1    | 2.32117  | Rrn3     | -1.02464 |
| Smco4    | -1.034433574 | Syt7     | 2.424477 | Ctnna2   | -1.02353 |

|          |              |           |          |          |          |
|----------|--------------|-----------|----------|----------|----------|
| Runx2    | -1.024183129 | Atp8a2    | 2.43887  | Gfra2    | -1.02353 |
| Pgk1     | -1.018144905 | Actn1     | 2.469204 | Dync1i1  | -1.02353 |
| Samd4    | -1.017690986 | Atg16l2   | 2.4919   | Tdrd3    | -1.01921 |
| Sgk3     | -1.015343071 | Dhrs3     | 2.530744 | Coq2     | -1.01292 |
| Jmy      | -1.015123809 | Lyst      | 2.603127 | Acaca    | -1.00758 |
| Cse1l    | -1.012149688 | Epas1     | 2.61665  | Gtpbp4   | -1.00609 |
| Coa7     | -1.011756687 | Tmcc1     | 2.672724 | Rpf2     | -1.00182 |
| Slc25a13 | -1.00023967  | Arhgap22  | 2.704005 | 1810011O | -1.00117 |
|          |              | Clvs1     | 2.717034 | Snrpa1   | -1.00081 |
|          |              | Syne1     | 2.765264 |          |          |
|          |              | Fos       | 2.84308  |          |          |
|          |              | Irs1      | 2.91551  |          |          |
|          |              | Marcks    | 2.95732  |          |          |
|          |              | Prss52    | 2.957386 |          |          |
|          |              | Rap1gap2  | 3.035576 |          |          |
|          |              | Basp1     | 3.056378 |          |          |
|          |              | Klf4      | 3.081088 |          |          |
|          |              | Fam46c    | 3.125386 |          |          |
|          |              | Sgms1     | 3.189817 |          |          |
|          |              | Maml2     | 3.256511 |          |          |
|          |              | Hgf       | 3.259509 |          |          |
|          |              | Arhgap24  | 3.276018 |          |          |
|          |              | Abca1     | 3.356748 |          |          |
|          |              | St18      | 3.396875 |          |          |
|          |              | Mctp2     | 3.454766 |          |          |
|          |              | Abcg3     | 3.462095 |          |          |
|          |              | Hao1      | 3.52095  |          |          |
|          |              | Alcam     | 3.731137 |          |          |
|          |              | Lrrc6     | 3.800651 |          |          |
|          |              | Dfna5     | 3.821065 |          |          |
|          |              | Flrt3     | 3.854332 |          |          |
|          |              | Gcnt2     | 3.877138 |          |          |
|          |              | 1-Mar     | 3.891465 |          |          |
|          |              | Sstr4     | 3.909664 |          |          |
|          |              | 4933430I1 | 3.913887 |          |          |
|          |              | Fzd1      | 3.922848 |          |          |
|          |              | Olfm4     | 3.925131 |          |          |
|          |              | Plk2      | 3.941655 |          |          |
|          |              | Pdcd1lg2  | 3.973437 |          |          |
|          |              | Mapre3    | 3.991096 |          |          |
|          |              | Tmem132l  | 4.045656 |          |          |
|          |              | Mapk13    | 4.04635  |          |          |
|          |              | Pid1      | 4.089845 |          |          |
|          |              | Ppap2b    | 4.887271 |          |          |
|          |              | Cpeb1     | 4.945067 |          |          |
|          |              | Inhba     | 5.047926 |          |          |
|          |              | Trib1     | 5.060409 |          |          |
|          |              | Msr1      | 5.447355 |          |          |
|          |              | Mafb      | 5.458963 |          |          |

|        |          |
|--------|----------|
| Egr3   | 5.711404 |
| Kcnn3  | 6.058659 |
| Maf    | 6.116051 |
| Erc2   | 6.854318 |
| Pbx1   | 6.945694 |
| Ch25h  | 6.971965 |
| Slc9a4 | 7.060675 |
| Emp1   | 7.286263 |

| joint targets DOT1Li up-regulated joint targets. |          | MLL1i down-regulated joint targets. |          | MLL1i up-regulated joint |          |
|--------------------------------------------------|----------|-------------------------------------|----------|--------------------------|----------|
| gene                                             | logfold  | gene                                | logfold  | gene                     | logfold  |
| Mab21l3                                          | 1.001463 | Bcl11a                              | -9.92076 | Trib1                    | 1.085694 |
| A530099J                                         | 1.003664 | Eya1                                | -9.27677 | Ankrd7                   | 1.105795 |
| Calcr1                                           | 1.009999 | Ttc29                               | -7.92246 | Syt7                     | 1.105795 |
| Kdm6b                                            | 1.013643 | Nol4                                | -6.10143 | Tgm6                     | 1.105795 |
| Ggh                                              | 1.025585 | Pcdh17                              | -5.96062 | Kcnma1                   | 1.111704 |
| Wdfy3                                            | 1.02571  | Elavl2                              | -5.8786  | Sncaip                   | 1.115548 |
| Dazl                                             | 1.02603  | Dsel                                | -4.86868 | Cpeb1                    | 1.126249 |
| Klhl32                                           | 1.02603  | Prox1                               | -4.85062 | Gdf7                     | 1.1866   |
| Ceacam1e                                         | 1.027099 | Igfbp7                              | -4.66986 | Cdh17                    | 1.208755 |
| Etv1                                             | 1.02942  | Eitd1                               | -4.34925 | C2cd4a                   | 1.227292 |
| Ifitm1                                           | 1.029689 | Amigo2                              | -4.0736  | Hsd11b1                  | 1.228612 |
| Ly86                                             | 1.040637 | Adamts17                            | -4.03188 | Gpr84                    | 1.238861 |
| Till7                                            | 1.047397 | Grb14                               | -4.00531 | Alcam                    | 1.240984 |
| Zfp276                                           | 1.053399 | Clec3a                              | -3.81445 | Fam65b                   | 1.30009  |
| Ncs1                                             | 1.059479 | Sox6                                | -3.55534 | Pid1                     | 1.317419 |
| Nt5c2                                            | 1.059889 | Prkca                               | -3.12783 | Ano4                     | 1.348374 |
| 1700003F                                         | 1.06924  | Sgce                                | -2.93098 | Luzp1                    | 1.350266 |
| Hs3st3b1                                         | 1.073001 | Abcg2                               | -2.89739 | Ly86                     | 1.378488 |
| E030018B                                         | 1.075685 | Arrdc3                              | -2.79839 | Pcdh7                    | 1.38529  |
| Slc16a7                                          | 1.077184 | Fzd8                                | -2.79675 | Dazl                     | 1.394382 |
| Acvr2a                                           | 1.081391 | Tsc22d1                             | -2.5137  | Klhl32                   | 1.394382 |
| Snx24                                            | 1.090025 | Ptprg                               | -2.50462 | Abca1                    | 1.410132 |
| Rab13                                            | 1.093554 | Arhgap32                            | -2.41301 | Flrt3                    | 1.427723 |
| Ski                                              | 1.107351 | Mettl24                             | -2.1827  | Lysmd2                   | 1.485056 |
| Antxr2                                           | 1.113089 | Stxbp6                              | -2.12638 | Abcg3                    | 1.510593 |
| Dach1                                            | 1.116461 | Hlf                                 | -2.10059 | Cers3                    | 1.540003 |
| Phactr2                                          | 1.141437 | Antxr1                              | -2.0554  | Nbea                     | 1.586463 |
| Herc3                                            | 1.159739 | Chl1                                | -2.04299 | Ctnna2                   | 1.617903 |
| Dusp6                                            | 1.164217 | Cyp27a1                             | -2.0396  | Plk2                     | 1.62719  |
| Ctsb                                             | 1.168151 | 1700112E                            | -2.02534 | Fzd1                     | 1.668676 |
| Cdk5r1                                           | 1.17601  | Marcks                              | -1.98844 | Atp8a2                   | 1.950978 |
| Ubash3b                                          | 1.177199 | Ttc36                               | -1.91779 | Msr1                     | 2.117295 |
| Slc8a1                                           | 1.190287 | Rag2                                | -1.9018  | Maf                      | 2.358625 |
| Hebp2                                            | 1.191503 | Mgarp                               | -1.89736 | 4933430I1                | 2.393042 |
| Nbea                                             | 1.191948 | Enpep                               | -1.89461 | Lrrc6                    | 2.426538 |
| Reep3                                            | 1.252835 | Col25a1                             | -1.89297 | Ch25h                    | 2.767978 |
| C1galt1                                          | 1.25449  | Med12l                              | -1.86498 | Ppargc1a                 | 3.106327 |
| Mbp                                              | 1.267614 | Ptpr                                | -1.79332 | Slc9a4                   | 3.170549 |
| Sox6                                             | 1.283799 | Tcp11                               | -1.7931  | Emp1                     | 3.244175 |
| Snx10                                            | 1.301872 | Dsp                                 | -1.78835 | Dlg2                     | 3.39537  |
| Galnt3                                           | 1.301978 | Rdm1                                | -1.7731  | Hao1                     | 3.608295 |
| Tiam2                                            | 1.308983 | Iqgap2                              | -1.76584 | Mafb                     | 3.809913 |
| Gas7                                             | 1.322633 | 1700056E                            | -1.70569 |                          |          |
| Gcnt1                                            | 1.330345 | 1810011O                            | -1.70193 |                          |          |
| 4931408C                                         | 1.341794 | Sfrp2                               | -1.64804 |                          |          |
| Chrm3                                            | 1.363436 | Fam46c                              | -1.61983 |                          |          |
| Kif13b                                           | 1.376333 | Efnb2                               | -1.61403 |                          |          |

|           |          |          |          |
|-----------|----------|----------|----------|
| Pde7b     | 1.377264 | Gpr125   | -1.56542 |
| Hdac9     | 1.388908 | Ctnnbip1 | -1.46676 |
| Rap2b     | 1.38972  | Olfm1    | -1.44008 |
| N4bp2l1   | 1.393265 | Myh14    | -1.43534 |
| Luzp1     | 1.396773 | Mtus2    | -1.41717 |
| Smad6     | 1.407193 | Spsb1    | -1.40983 |
| Jak2      | 1.409306 | Kazn     | -1.39868 |
| Myh10     | 1.41008  | Adm      | -1.38275 |
| Al467606  | 1.413373 | Eno1b    | -1.38206 |
| Adrb2     | 1.426767 | Gira1    | -1.34712 |
| Kirrel3   | 1.438013 | 4930562C | -1.29569 |
| Iqgap2    | 1.44843  | Cyp26a1  | -1.293   |
| Ube2h     | 1.451155 | Ppp1r9a  | -1.2386  |
| Gm527     | 1.472024 | 9430020K | -1.22367 |
| Gnaz      | 1.490652 | Wdr19    | -1.22065 |
| Rdm1      | 1.493549 | Srgap1   | -1.20504 |
| Celf4     | 1.496779 | Rwdd3    | -1.18472 |
| Lrrc8d    | 1.497593 | Rbm47    | -1.17548 |
| Tulp4     | 1.500049 | Dync2li1 | -1.1716  |
| Arid3b    | 1.503054 | Epm2a    | -1.14322 |
| Fry       | 1.51155  | Wdr27    | -1.11857 |
| Klf6      | 1.515768 | Galnt11  | -1.11263 |
| Nedd9     | 1.516965 | Mpzl1    | -1.11016 |
| Gpr68     | 1.529198 | Galnt18  | -1.10374 |
| Bcl2l11   | 1.530546 | Dclk2    | -1.10319 |
| Pparg     | 1.531655 | Pard6g   | -1.09968 |
| 3110043O  | 1.557833 | Smad6    | -1.08627 |
| Adcy9     | 1.559878 | Gcm2     | -1.07008 |
| Glrx      | 1.560444 | Gcnt1    | -1.05716 |
| Tnfsf8    | 1.561433 | Celf4    | -1.04753 |
| Cdh17     | 1.573154 | Cgn      | -1.04299 |
| Abca13    | 1.575253 | Zfp365   | -1.04299 |
| Myo3b     | 1.578143 | 1700025G | -1.03854 |
| Hmox1     | 1.579971 | Basp1    | -1.03704 |
| Till11    | 1.581526 | Pde7b    | -1.03537 |
| Lims1     | 1.594342 | Atp10a   | -1.02399 |
| Clvs1     | 1.594661 | Fggy     | -1.01891 |
| Gpr75     | 1.611157 | Prkar2b  | -1.00217 |
| Trim67    | 1.613209 |          |          |
| Tmc3      | 1.624302 |          |          |
| Tbc1d2    | 1.627561 |          |          |
| Med12l    | 1.647511 |          |          |
| Rab11fip4 | 1.648991 |          |          |
| Ankrd7    | 1.651319 |          |          |
| Ptges     | 1.665556 |          |          |
| Btg1      | 1.669271 |          |          |
| Tusc1     | 1.672324 |          |          |
| Cyb561    | 1.673206 |          |          |
| Tmem106i  | 1.687265 |          |          |



|          |          |
|----------|----------|
| Vcl      | 1.71237  |
| Gpr84    | 1.739561 |
| Fam196b  | 1.745308 |
| Mast4    | 1.759815 |
| Lhfpl2   | 1.767717 |
| Cmpk2    | 1.769343 |
| Ets1     | 1.776187 |
| Csrnp1   | 1.776483 |
| Tgfbr2   | 1.823373 |
| Maml2    | 1.823462 |
| Dock9    | 1.826996 |
| Nanos1   | 1.833178 |
| Nabp1    | 1.85078  |
| Lmod3    | 1.901123 |
| Tgm6     | 1.909406 |
| Rassf3   | 1.91283  |
| Nos1ap   | 1.919918 |
| Megf9    | 1.953152 |
| Marcks   | 2.004192 |
| Fscn1    | 2.046465 |
| Lpp      | 2.052574 |
| Phactr1  | 2.056445 |
| 2010300C | 2.112292 |
| Ptger2   | 2.114748 |
| Irs2     | 2.128325 |
| Fam65b   | 2.153727 |
| Tcf7l2   | 2.183762 |
| Tenm4    | 2.193606 |
| Klf5     | 2.201796 |
| Atp8a2   | 2.210255 |
| Dhrs3    | 2.240293 |
| Epas1    | 2.262124 |
| Abca1    | 2.268831 |
| Sqrdl    | 2.271471 |
| Rnf144b  | 2.275962 |
| Actn1    | 2.278102 |
| Arhgap24 | 2.287169 |
| Hsd11b1  | 2.299253 |
| Prss52   | 2.299451 |
| Arhgap22 | 2.300283 |
| Olfm1    | 2.312819 |
| Cers3    | 2.332094 |
| Erg      | 2.366312 |
| Lrrtm2   | 2.411618 |
| Atg16l2  | 2.427018 |
| Cyp26a1  | 2.434173 |
| Lyst     | 2.442742 |
| Fzd1     | 2.475131 |
| Basp1    | 2.489947 |

|           |          |
|-----------|----------|
| Rap1gap2  | 2.53441  |
| Agpat9    | 2.553453 |
| Tmcc1     | 2.557776 |
| Glra1     | 2.666569 |
| 4933430I1 | 2.669515 |
| Pdcd1lg2  | 2.687108 |
| Klf4      | 2.704438 |
| St18      | 2.758602 |
| Reck      | 2.7651   |
| Ctdspl    | 2.766534 |
| Adpgk     | 2.769543 |
| Tmem132l  | 2.777102 |
| Syt7      | 2.917642 |
| Cacnb2    | 2.962368 |
| Fos       | 3.087213 |
| Sstr4     | 3.097164 |
| Sgms1     | 3.129292 |
| Syne1     | 3.144919 |
| Tal2      | 3.168632 |
| Plk2      | 3.175534 |
| Abcg3     | 3.194751 |
| Mctp2     | 3.206169 |
| Gcm2      | 3.265725 |
| Dsp       | 3.279278 |
| 3830403N  | 3.299451 |
| Hao1      | 3.316161 |
| Hgf       | 3.318895 |
| Gcnt2     | 3.492433 |
| Alcam     | 3.584147 |
| 1-Mar     | 3.591914 |
| Dfna5     | 3.659925 |
| Trib1     | 3.825115 |
| Fam46c    | 3.826628 |
| Perp      | 3.997595 |
| Ppap2b    | 4.041644 |
| Cpeb1     | 4.060874 |
| Mapre3    | 4.124883 |
| Mafb      | 4.163105 |
| Pid1      | 4.255439 |
| Mapk13    | 4.301482 |
| Flrt3     | 4.381258 |
| Egr3      | 4.4541   |
| Inhba     | 4.914055 |
| Olfm4     | 4.955812 |
| Dlg2      | 5.154774 |
| Maf       | 5.382676 |
| Erc2      | 5.570686 |
| Lrrc6     | 5.672902 |
| Msr1      | 6.015625 |

|        |          |
|--------|----------|
| Pbx1   | 6.239948 |
| Kcnn3  | 6.430341 |
| Emp1   | 7.145812 |
| Ch25h  | 7.264839 |
| Slc9a4 | 7.324661 |

t targets. BRD4i down-regulated joint targets. BRD4i up-regulated MLL1 and MLL-AF9 joint targets.

| gene     | logfold  | gene     | logfold  |
|----------|----------|----------|----------|
| Clec3a   | -8.42737 | N6amt1   | 1.000883 |
| Ttc29    | -7.84382 | Irs1     | 1.018419 |
| Elavl2   | -7.37027 | Maml3    | 1.027252 |
| Eltf1    | -6.38428 | Spag17   | 1.02775  |
| Hlf      | -6.19637 | Mbnl1    | 1.041482 |
| Col25a1  | -6.12461 | Rnf220   | 1.056255 |
| Erg      | -5.72227 | Flnb     | 1.093565 |
| Fzd8     | -5.64974 | Snx24    | 1.11083  |
| Sgce     | -5.40183 | Tgm6     | 1.134819 |
| Ptpr     | -5.25766 | Bcl2l11  | 1.135765 |
| Grb14    | -4.69505 | Met      | 1.143623 |
| Abcg2    | -4.40035 | Reep3    | 1.171332 |
| Spns3    | -4.39164 | Gnaz     | 1.172998 |
| Dsel     | -4.25496 | Zfp365   | 1.172998 |
| Cyp26a1  | -4.19946 | Kirrel3  | 1.186633 |
| Pde7b    | -4.14726 | Wdfy3    | 1.187183 |
| Olfm4    | -4.10564 | Vps13c   | 1.188371 |
| Amigo2   | -4.06933 | Hoxa10   | 1.198362 |
| Basp1    | -4.02943 | Plk2     | 1.238583 |
| Tmem236  | -3.8313  | Fam65b   | 1.25097  |
| Enpep    | -3.82197 | Ctsb     | 1.251775 |
| Sfrp2    | -3.80008 | Map3k14  | 1.276882 |
| Pcdh17   | -3.67729 | Tulp4    | 1.281274 |
| Prox1    | -3.6531  | Ifitm1   | 1.283091 |
| Sox6     | -3.5899  | N4bp2l1  | 1.296902 |
| Tenm4    | -3.57798 | Chn2     | 1.346436 |
| Lhfpl2   | -3.57138 | Il6st    | 1.349046 |
| 9430020K | -3.55495 | Ski      | 1.378429 |
| Mgarp    | -3.52712 | Nanos1   | 1.387769 |
| Ceacam1e | -3.51543 | Arhgap24 | 1.388065 |
| Ppp1r9a  | -3.46049 | Hmox1    | 1.389128 |
| Dsp      | -3.42055 | St8sia4  | 1.431131 |
| Kcnh5    | -3.33796 | Nsun4    | 1.442215 |
| Trpm3    | -3.26873 | Ctnnbip1 | 1.45449  |
| Car12    | -3.23484 | Gm527    | 1.460831 |
| Kcnn3    | -3.22053 | Zfp619   | 1.463342 |
| Kazn     | -3.20007 | 3110043O | 1.485105 |
| Cyp26b1  | -3.19586 | Spsb1    | 1.544329 |
| Adamts17 | -3.14197 | Fsd1l    | 1.554276 |
| Tll7     | -3.12959 | Cgn      | 1.577831 |
| Myh14    | -3.12622 | Efnb2    | 1.582591 |
| Dnajc6   | -3.11867 | Herc3    | 1.621244 |
| Bhlha15  | -3.046   | Dusp6    | 1.623772 |
| Bcat1    | -2.98916 | Hpgd     | 1.656351 |
| Pbx1     | -2.91759 | Atrnl1   | 1.68989  |
| Chrm3    | -2.91344 | Abhd6    | 1.73359  |
| Inhba    | -2.87363 | Dennd2c  | 1.737681 |

|          |          |          |          |
|----------|----------|----------|----------|
| Cdkn1c   | -2.84984 | Luzp1    | 1.781162 |
| Plekhh2  | -2.82612 | Fam105a  | 1.803429 |
| Fgfbp3   | -2.82032 | Dazl     | 1.831111 |
| Camk4    | -2.69782 | Magi1    | 1.838679 |
| Ptges    | -2.66823 | Epas1    | 1.846091 |
| Ano4     | -2.64804 | Maf      | 1.896835 |
| Marcks   | -2.64506 | Ppap2b   | 1.927805 |
| Gpr84    | -2.62463 | Pcdh7    | 1.954077 |
| Erc2     | -2.58372 | Tox      | 2.479792 |
| F13a1    | -2.55702 | Crim1    | 2.923024 |
| Gcm2     | -2.51165 | C2cd4a   | 3.0906   |
| Pdcd1lg2 | -2.48304 | Flrt3    | 3.114435 |
| Cyp27a1  | -2.46992 | Cxcl12   | 3.408689 |
| 1810011O | -2.43398 | Ppargc1a | 3.474915 |
| Dio2     | -2.40642 | Egr3     | 3.753447 |
| Rab13    | -2.40027 | Mafb     | 4.323838 |
| Cyb561   | -2.36988 |          |          |
| Rgs18    | -2.36309 |          |          |
| Bcl2l14  | -2.34163 |          |          |
| Mettl24  | -2.34064 |          |          |
| Tacc2    | -2.33403 |          |          |
| 1700112E | -2.31853 |          |          |
| Stxbp6   | -2.2705  |          |          |
| Arrdc3   | -2.23911 |          |          |
| Igfbp7   | -2.23147 |          |          |
| Celf4    | -2.22656 |          |          |
| Sntb1    | -2.21514 |          |          |
| Perp     | -2.20019 |          |          |
| B3galt2  | -2.19677 |          |          |
| Eno1b    | -2.19067 |          |          |
| Pparg    | -2.1315  |          |          |
| Smad6    | -2.13096 |          |          |
| Iqgap2   | -2.06651 |          |          |
| Cr2      | -2.06484 |          |          |
| Olfm1    | -2.03531 |          |          |
| Med12l   | -1.99616 |          |          |
| Syne1    | -1.99304 |          |          |
| Zfp804a  | -1.97945 |          |          |
| Gcnt2    | -1.96024 |          |          |
| Plxnd1   | -1.93506 |          |          |
| Hsd11b1  | -1.92271 |          |          |
| Iqcg     | -1.85523 |          |          |
| Tiam1    | -1.85027 |          |          |
| Irak1bp1 | -1.84037 |          |          |
| Trib2    | -1.81219 |          |          |
| Slc16a3  | -1.81081 |          |          |
| Mtus2    | -1.80569 |          |          |
| A530099J | -1.78335 |          |          |
| Stc2     | -1.77247 |          |          |

|           |          |
|-----------|----------|
| D8Ert82e  | -1.76087 |
| Flrt1     | -1.71456 |
| Phactr2   | -1.70771 |
| Cacna1b   | -1.66861 |
| Fam46c    | -1.65739 |
| Pmp22     | -1.65575 |
| Hgf       | -1.6549  |
| 4930562C  | -1.64891 |
| Fscn1     | -1.6219  |
| Elovl6    | -1.61735 |
| Dync2li1  | -1.61339 |
| Rwdd3     | -1.57089 |
| B4galt6   | -1.56111 |
| Esr1      | -1.56078 |
| Hdac9     | -1.52912 |
| Tcp11     | -1.52197 |
| Efhd1     | -1.50937 |
| Rasd1     | -1.49842 |
| Hebp2     | -1.49549 |
| Pgk1      | -1.41676 |
| Impdh1    | -1.40006 |
| Calcr1    | -1.39856 |
| Kit       | -1.39024 |
| Mctp2     | -1.3872  |
| Angptl4   | -1.37921 |
| Camkmt    | -1.37438 |
| Matn1     | -1.34064 |
| Ctnna2    | -1.34064 |
| 1700056E  | -1.3363  |
| Thrb      | -1.33578 |
| Ttc36     | -1.32894 |
| Rbm47     | -1.31257 |
| Gpr68     | -1.30481 |
| Pid1      | -1.2964  |
| Smco4     | -1.28518 |
| Plxna2    | -1.27045 |
| Rab39b    | -1.24212 |
| Dach1     | -1.22495 |
| Dfna5     | -1.19954 |
| Gm5803    | -1.19895 |
| Ets1      | -1.19889 |
| Dnah11    | -1.19861 |
| Extl3     | -1.19199 |
| Nav2      | -1.19013 |
| Ankrd28   | -1.18462 |
| Tbxas1    | -1.18393 |
| Tbc1d2    | -1.15281 |
| Gdf7      | -1.14731 |
| Rab11fip4 | -1.11078 |

|           |          |
|-----------|----------|
| Csrnp1    | -1.10031 |
| Ldlrad4   | -1.06392 |
| 1700016H  | -1.05951 |
| Asap1     | -1.05765 |
| Rab11fip2 | -1.05076 |
| Dact1     | -1.04674 |
| Imp2l     | -1.03725 |
| Susd1     | -1.03469 |
| Ero1l     | -1.01516 |
| Sema3b    | -1.00232 |
